# Supplementary material for: Investigating causal relationships between obesity and skin barrier function in a multi-ethnic Asian general population cohort
Source: PubMed Central journal article supplement (PMC10511308; doi:10.1038/s41366-023-01343-z), 2023-07-21
Supplement: 41366_2023_1343_MOESM2_ESM.pdf [file 41366_2023_1343_MOESM2_ESM.pdf]

Supplementary Table 1. List of SNPs for body mass index (BMI) and their effect on logTEWL

| SNP       | Sample Size | List of BMI SNPs from GIANT Consortium 2018 |             |          | Locke et al + UKBiobank |               | Effect Allele | Other Allele | Missing SNPs | LD(r2)       | BMI_SNP <sub>s</sub> Effect Allele | Other Allele | Beta_BMI | Effects of BMI SNPs on skin physio (using current dataset) |            |             |              |                |                 |              |                |                 |           |
|-----------|-------------|---------------------------------------------|-------------|----------|-------------------------|---------------|---------------|--------------|--------------|--------------|------------------------------------|--------------|----------|------------------------------------------------------------|------------|-------------|--------------|----------------|-----------------|--------------|----------------|-----------------|-----------|
|           |             | Chromosome                                  | Position    | Position | Position                | Effect Allele |               |              |              |              |                                    |              |          | Other Allele                                               | seBeta_BMI | p-value_BMI | Beta_logTEWL | seBeta_logTEWL | p-value_logTEWL | Beta_logmois | seBeta_logmois | p-value_logmois | Beta_logH |
| rs1000096 | 656860      | 4                                           | 38692835 C  | A        |                         |               |               |              |              | rs1000096 T  | C                                  | 0.5696       | 1.4459   | 0.6900                                                     | 0.0126     | 0.0082      | 0.1300       | -0.0068038     | 0.0164843       | 0.68         | -6.2933E-05    | 0.0039886       | 0.99      |
| rs100094C | 794558      | 17                                          | 5283252 G   | T        |                         |               |               |              |              | rs100094A    | C                                  | 0.1759       | 1.2276   | 0.8900                                                     | -0.0163    | 0.0070      | 0.0200       | -0.0068894     | 0.0140228       | 0.62         | -0.0048977     | 0.0039697       | 0.89      |
| rs1003081 | 788712      | 11                                          | 118913993 T | C        |                         |               |               |              |              | rs1003081 A  | T                                  | 0.3345       | 1.3722   | 0.8100                                                     | -0.0050    | 0.0079      | 0.5300       | 0.0134442      | 0.0156923       | 0.39         | 0.00185379     | 0.0037899       | 0.62      |
| rs1003528 | 689769      | 5                                           | 153095918 A | G        |                         |               |               |              |              | rs1003528A   | C                                  | 1.5873       | 2.1636   | 0.4600                                                     | 0.0102     | 0.0123      | 0.4100       | -0.0414231     | 0.0245718       | 0.092        | -0.00056436    | 0.00593454      | 0.92      |
| rs1003704 | 680227      | 5                                           | 88219964 G  | A        |                         |               |               |              |              |              |                                    |              |          |                                                            |            |             |              |                |                 |              |                |                 |           |
| rs1006353 | 790767      | 13                                          | 28047269 A  | G        |                         |               |               |              |              |              |                                    |              |          |                                                            |            |             |              |                |                 |              |                |                 |           |
| rs1006683 | 662130      | 5                                           | 151254297 T | C        |                         |               |               |              |              | rs1006683 T  | C                                  | 2.2336       | 4.6377   | 0.6300                                                     | -0.0027    | 0.0266      | 0.9200       | -0.0502481     | 0.053115        | 0.34         | 0.000610012    | 0.0131692       | 0.96      |
| rs100838C | 690845      | 16                                          | 671400 C    | T        |                         |               |               |              |              | rs10083803 C | C                                  | 0.4741       | 1.3555   | 0.7300                                                     | -0.0075    | 0.0276      | 0.3300       | -0.0025651     | 0.0155114       | 0.81         | 0.000182971    | 0.00374674      | 0.96      |
| rs1011072 | 551363      | 8                                           | 14324437 A  | G        |                         |               |               |              |              | rs7815841    | G                                  | 1.9222       | 1.8761   | 0.3100                                                     | 0.0011     | 0.0107      | 0.9200       | -0.0409542     | 0.0214002       | 0.056        | -0.00255731    | 0.00519147      | 0.62      |
| rs101187C | 692315      | 9                                           | 103061366 G | A        |                         |               |               |              |              | rs5029343    | C                                  | 2.0825       | 1.7454   | 0.2300                                                     | 0.0049     | 0.0100      | 0.6200       | 0.00625474     | 0.0199221       | 0.75         | 0.00702788     | 0.00486365      | 0.15      |
| rs1013185 | 691777      | 14                                          | 97258752 C  | A        |                         |               |               |              |              |              |                                    |              |          |                                                            |            |             |              |                |                 |              |                |                 |           |
| rs1013228 | 786578      | 14                                          | 25928179 C  | A        |                         |               |               |              |              | rs10132280 C | A                                  | 4.6079       | 2.1639   | 0.0330                                                     | 0.0142     | 0.0124      | 0.2500       | 0.049652       | 0.0247524       | 0.045        | -0.0007806     | 0.00594198      | 0.9       |
| rs1014194 | 686107      | 5                                           | 168192944 A | G        |                         |               |               |              |              | rs1014194 C  | A                                  | 1.3936       | 1.2230   | 0.2500                                                     | -0.0132    | 0.0070      | 0.0590       | 0.0136006      | 0.0139911       | 0.33         | -0.00294194    | 0.00337058      | 0.38      |
| rs1014312 | 686402      | 3                                           | 135621417 C | G        |                         |               |               |              |              |              |                                    |              |          |                                                            |            |             |              |                |                 |              |                |                 |           |
| rs1014652 | 781339      | 14                                          | 79498850 T  | C        |                         |               |               |              |              | rs1014652 T  | C                                  | 1.1481       | 1.4822   | 0.4400                                                     | -0.0018    | 0.0085      | 0.8300       | 0.0266222      | 0.0168974       | 0.12         | 0.00151089     | 0.00409065      | 0.71      |
| rs1015362 | 692525      | 20                                          | 327138612 C | T        |                         |               |               |              |              | rs1015362 C  | T                                  | 1.4947       | 1.5762   | 0.3400                                                     | 0.0132     | 0.0090      | 0.1400       | -0.0043774     | 0.0180055       | 0.81         | -0.00263387    | 0.00437445      | 0.55      |
| rs1015363 | 687260      | 20                                          | 32738335 G  | A        |                         |               |               |              |              | rs11700255   | A                                  | 1.9402       | 1.7083   | 0.2600                                                     | -0.0116    | 0.0097      | 0.2300       | -0.0060141     | 0.0194501       | 0.76         | -0.00325405    | 0.0047398       | 0.49      |
| rs1016815 | 689662      | 2                                           | 51834839 G  | C        |                         |               |               |              |              | rs11700255 T | G                                  | 0.5132       | 1.3482   | 0.7000                                                     | 0.0009     | 0.0077      | 0.9100       | 0.0201479      | 0.0153926       | 0.19         | 0.00364321     | 0.0037456       | 0.33      |
| rs1018218 | 792111      | 2                                           | 25150296 G  | A        |                         |               |               |              |              | rs10182181 A | G                                  | 0.4013       | 1.2171   | 0.7400                                                     | -0.0008    | 0.0069      | 0.9100       | -0.0032633     | 0.0138897       | 0.81         | 0.000693228    | 0.0035198       | 0.84      |
| rs1019033 | 527668      | 2                                           | 61619267 T  | G        |                         |               |               |              |              | rs10190332 G | T                                  | 0.9483       | 1.2888   | 0.4600                                                     | -0.0056    | 0.0073      | 0.4400       | -0.00393821    | 0.0146824       | 0.79         | 0.00592156     | 0.00356491      | 0.997     |
| rs1020327 | 690127      | 2                                           | 102496700 A | G        |                         |               |               |              |              | rs10203277 G | A                                  | 0.1876       | 1.5649   | 0.9000                                                     | 0.0128     | 0.0090      | 0.1500       | 0.0336958      | 0.0179005       | 0.06         | -0.00446314    | 0.00436243      | 0.31      |
| rs1020546 | 688748      | 6                                           | 56810539 G  | A        |                         |               |               |              |              |              |                                    |              |          |                                                            |            |             |              |                |                 |              |                |                 |           |
| rs1021105 | 686577      | 2                                           | 229016917 C | T        |                         |               |               |              |              |              |                                    |              |          |                                                            |            |             |              |                |                 |              |                |                 |           |
| rs1026805 | 794416      | 7                                           | 44522617 C  | T        |                         |               |               |              |              | rs10268050 C | T                                  | 1.8875       | 4.6247   | 0.6800                                                     | 0.0145     | 0.0266      | 0.5800       | -0.0349953     | 0.0529244       | 0.51         | -0.00568638    | 0.0127415       | 0.66      |
| rs1026978 | 790551      | 7                                           | 49616203 A  | G        |                         |               |               |              |              | rs10269783 G | C                                  | 0.5335       | 1.1894   | 0.6500                                                     | 0.0026     | 0.0068      | 0.7000       | -0.012506      | 0.0135624       | 0.36         | -0.00070188    | 0.00327623      | 0.83      |
| rs1027504 | 610254      | 7                                           | 1273845 T   | A        |                         |               |               |              |              |              |                                    |              |          |                                                            |            |             |              |                |                 |              |                |                 |           |
| rs103501C | 637868      | 7                                           | 69598328 T  | C        |                         |               |               |              |              | rs1035010 C  | T                                  | 1.1692       | 1.3016   | 0.3700                                                     | 0.0075     | 0.0074      | 0.3100       | -0.0043932     | 0.0148317       | 0.77         | 0.00405518     | 0.00358987      | 0.26      |
| rs1037587 | 687559      | 11                                          | 11796727 T  | C        |                         |               |               |              |              | rs1037587 T  | C                                  | 0.9550       | 1.2836   | 0.4600                                                     | 0.0010     | 0.0073      | 0.8900       | 0.0208944      | 0.0146417       | 0.15         | -0.00083395    | 0.00354837      | 0.81      |
| rs1038088 | 794680      | 17                                          | 28074563 G  | T        |                         |               |               |              |              | rs1038088 G  | T                                  | 1.2107       | 1.2941   | 0.3500                                                     | 0.0090     | 0.0074      | 0.2200       | 0.016549       | 0.0147542       | 0.26         | -0.00149846    | 0.00360105      | 0.68      |
| rs1040801 | 794820      | 19                                          | 33963766 T  | C        |                         |               |               |              |              | rs10408013 C | T                                  | 0.6533       | 1.8619   | 0.7300                                                     | 0.0057     | 0.0107      | 0.5900       | -0.0029358     | 0.0213041       | 0.89         | -0.00300625    | 0.00514181      | 0.56      |
| rs1040881 | 691190      | 20                                          | 15099816 T  | C        |                         |               |               |              |              | rs1040881 C  | T                                  | 1.8938       | 4.9050   | 0.7000                                                     | -0.0047    | 0.0280      | 0.8700       | 0.0668381      | 0.0558644       | 0.23         | 0.0127991      | 0.00316027      | 0.35      |
| rs104389E | 686868      | 18                                          | 42950629 C  | T        |                         |               |               |              |              |              |                                    |              |          |                                                            |            |             |              |                |                 |              |                |                 |           |
| rs1045411 | 776153      | 13                                          | 31033232 C  | T        |                         |               |               |              |              | rs1045411 C  | T                                  | 1.0417       | 1.4320   | 0.4700                                                     | -0.0151    | 0.0082      | 0.0650       | -0.0246306     | 0.0162923       | 0.13         | 0.00795487     | 0.00394057      | 0.044     |
| rs1045663 | 788067      | 6                                           | 50763935 A  | T        |                         |               |               |              |              |              |                                    |              |          |                                                            |            |             |              |                |                 |              |                |                 |           |
| rs1045901 | 792142      | 11                                          | 55091574 A  | C        |                         |               |               |              |              | rs10459012 A | C                                  | 1.0749       | 1.2672   | 0.4000                                                     | -0.0128    | 0.0072      | 0.0770       | 0.0107592      | 0.0144409       | 0.46         | -0.00103549    | 0.00350866      | 0.77      |
| rs104609E | 793248      | 3                                           | 42308735 A  | G        |                         |               |               |              |              | rs1799923    | A                                  | 1.2748       | 1.3563   | 0.6300                                                     | -0.0129    | 0.0078      | 0.0970       | -0.0051259     | 0.0154979       | 0.74         | 0.0094357      | 0.00377299      | 0.82      |
| rs1046753 | 689848      | 13                                          | 54884130 C  | G        |                         |               |               |              |              | rs4883848    | C                                  | 0.9874       | 1.8930   | 0.4000                                                     | -0.0123    | 0.0108      | 0.2500       | 0.00282461     | 0.0216486       | 0.9          | -0.00092881    | 0.00522402      | 0.16      |
| rs1048365 | 636076      | 7                                           | 108004430 T | C        |                         |               |               |              |              | rs1048365 C  | T                                  | 0.8479       | 1.2382   | 0.4900                                                     | -0.0018    | 0.0071      | 0.8000       | 0.0073644      | 0.0141078       | 0.6          | -0.00014058    | 0.00341838      | 0.97      |
| rs1048775 | 690082      | 17                                          | 79202329 C  | G        |                         |               |               |              |              | rs1048775 G  | C                                  | 2.2665       | 1.3171   | 0.0850                                                     | 0.0049     | 0.0075      | 0.5200       | -0.0080522     | 0.015054        | 0.59         | -0.00157303    | 0.00366515      | 0.67      |
| rs1048932 | 795167      | 11                                          | 115044850 C | A        |                         |               |               |              |              | rs1048932 C  | A                                  | 2.9891       | 1.2188   | 0.0140                                                     | 0.0093     | 0.0070      | 0.1800       | -0.0141859     | 0.0139668       | 0.31         | 0.0027804      | 0.00338987      | 0.41      |
| rs104978C | 780080      | 2                                           | 198585087 G | C        |                         |               |               |              |              |              |                                    |              |          |                                                            |            |             |              |                |                 |              |                |                 |           |
| rs1049927 | 794584      | 6                                           | 154309808 T | C        |                         |               |               |              |              | rs10499276 T | C                                  | 1.6615       | 2.6381   | 0.5300                                                     | -0.0128    | 0.0151      | 0.3900       | -0.0541782     | 0.0303225       | 0.074        | 0.00855021     | 0.00735296      | 0.24      |
| rs1050054 | 690612      | 16                                          | 69174141 T  | C        |                         |               |               |              |              | rs10500548 T | C                                  | 2.3347       | 4.1040   | 0.5700                                                     | -0.0534    | 0.0235      | 0.0230       | -0.0842066     | 0.0468001       | 0.072        | -0.0119847     | 0.0115302       | 0.3       |
| rs1051032 | 685852      | 3                                           | 6090992 T   | C        |                         |               |               |              |              |              |                                    |              |          |                                                            |            |             |              |                |                 |              |                |                 |           |
| rs1051105 | 692481      | 3                                           | 83763941 C  | T        |                         |               |               |              |              |              |                                    |              |          |                                                            |            |             |              |                |                 |              |                |                 |           |
| rs1051505 | 691102      | 17                                          | 51923847 C  | T        |                         |               |               |              |              | rs10515050 C | T                                  | 2.5716       | 1.4901   | 0.0840                                                     | -0.0057    | 0.0085      | 0.5000       | -0.0020411     | 0.0170315       | 0.9          | 0.00421149     | 0.00410524      | 0.3       |
| rs1051515 | 692302      | 15                                          | 77156899 T  | A        |                         |               |               |              |              | rs10519151 A | T                                  | 1.4428       | 3.0385   | 0.6300                                                     | -0.0005    | 0.0174      | 0.9700       | 0.00087838     | 0.0347526       | 0.98         | 0.00278769     | 0.00849574      | 0.74      |
| rs1057452 | 692447      | 16                                          | 29837714 A  | G        |                         |               |               |              |              | rs1057452 A  | G                                  | 2.4797       | 3.1860   | 0.4400                                                     | 0.0175     | 0.0180      | 0.3300       | -0.0223789     | 0.0359717       | 0.53         | -0.00608594    | 0.00886737      | 0.5       |
| rs1073205 | 781928      | 1                                           | 167280354 A | G        |                         |               |               |              |              | rs10732051 A | G                                  | 0.7129       | 1.3100   | 0.5900                                                     | 0.0009     | 0.0075      | 0.9000       | -0.0093504     | 0.0149628       | 0.53         | -0.00236899    | 0.00361773      | 0.51      |
| rs1074414 | 689141      | 12                                          | 17214281 G  | A        |                         |               |               |              |              | rs10744146 G | A                                  | 0.4530       | 1.2609   | 0.7200                                                     | 0.0054     | 0.0072      | 0.4500       | -0.0045699     | 0.0144086       | 0.75         | 0.00444219     | 0.00350759      | 0.21      |
| rs1074578 | 691086      | 12                                          | 97586257 T  | A        |                         |               |               |              |              | rs10745785 T | C                                  | 1.           |          |                                                            |            |             |              |                |                 |              |                |                 |           |

|           |        |    |           |   |   |            |      |            |        |        |        |         |        |         |            |           |            |             |            |             |            |      |
|-----------|--------|----|-----------|---|---|------------|------|------------|--------|--------|--------|---------|--------|---------|------------|-----------|------------|-------------|------------|-------------|------------|------|
| rs1093835 | 793518 | 4  | 45182527  | G | A | rs10938397 | A    | G          | 0.3220 | 1.3266 | 0.8100 | -0.0046 | 0.0076 | 0.5400  | -0.0359626 | 0.0151465 | 0.018      | -0.00173749 | 0.00367953 | 0.64        |            |      |
| rs1095362 | 687660 | 7  | 109137373 | C | A | rs10953620 | A    | C          | 0.7232 | 1.4517 | 0.6200 | -0.0034 | 0.0083 | 0.6800  | -0.0151171 | 0.0165441 | 0.36       | -0.00342538 | 0.00399254 | 0.39        |            |      |
| rs1095584 | 688388 | 8  | 118946541 | A | G | rs10955841 | A    | G          | 0.5458 | 1.1905 | 0.6500 | -0.0016 | 0.0068 | 0.8100  | 0.00830581 | 0.0135935 | 0.54       | -0.00026185 | 0.00327537 | 0.94        |            |      |
| rs1096254 | 692271 | 9  | 16719445  | T | C | rs10962549 | T    | C          | 0.7625 | 1.3754 | 0.5800 | 0.0030  | 0.0079 | 0.7100  | -0.0130644 | 0.0156649 | 0.4        | -0.00143664 | 0.00379713 | 0.76        |            |      |
| rs1097171 | 692587 | 9  | 3820938   | C | T | rs10971712 | T    | C          | 0.7523 | 6.5444 | 0.9100 | -0.0173 | 0.0371 | 0.6400  | -0.145702  | 0.0738757 | 0.049      | 0.00377334  | 0.0180438  | 0.83        |            |      |
| rs1098956 | 688508 | 9  | 10496304  | A | G | rs10989568 | A    | G          | 0.8645 | 1.1940 | 0.4700 | 0.0070  | 0.0068 | 0.3100  | -0.002713  | 0.0136243 | 0.84       | 0.00647977  | 0.00303185 | 0.05        |            |      |
| rs1103038 | 692117 | 11 | 28629115  | G | A | rs11030385 | A    | G          | 0.5325 | 1.3780 | 0.7000 | 0.0031  | 0.0079 | 0.7000  | 0.00853244 | 0.0156823 | 0.59       | 0.00420829  | 0.0038059  | 0.27        |            |      |
| rs1103901 | 793931 | 11 | 46895378  | A | G |            |      |            |        |        |        |         |        |         |            |           |            |             |            |             |            |      |
| rs1106630 | 795498 | 12 | 112871372 | A | G | rs11066301 | G    | A          | 1.9746 | 4.9700 | 0.6900 | -0.0338 | 0.0282 | 0.2300  | 0.0315811  | 0.0561129 | 0.57       | 0.00278498  | 0.0135611  | 0.84        |            |      |
| rs1106908 | 795186 | 17 | 34942595  | G | A | rs1106908  | G    | A          | 2.2762 | 1.2563 | 0.0700 | 0.0005  | 0.0072 | 0.9400  | -0.013464  | 0.0143399 | 0.36       | 0.0021642   | 0.00347612 | 0.53        |            |      |
| rs1107444 | 773181 | 16 | 20255123  | T | C | rs11074446 | C    | T          | 0.2414 | 1.4035 | 0.8600 | 0.0016  | 0.0080 | 0.8400  | 0.0060951  | 0.0160399 | 0.97       | -0.0107319  | 0.00386994 | 0.0056      |            |      |
| rs1107548 | 688802 | 16 | 62803841  | C | T | rs11075489 | T    | C          | 0.0931 | 1.2049 | 0.9400 | -0.0058 | 0.0069 | 0.4000  | 0.00117923 | 0.013748  | 0.93       | -0.00241486 | 0.0033266  | 0.47        |            |      |
| rs1107598 | 790364 | 16 | 53805344  | C | T |            |      |            |        |        |        |         |        |         |            |           |            |             |            |             |            |      |
| rs1107984 | 687694 | 17 | 47000785  | C | T |            |      |            |        |        |        |         |        |         |            |           |            |             |            |             |            |      |
| rs1111517 | 792384 | 12 | 82465797  | T | C |            |      |            |        |        |        |         |        |         |            |           |            |             |            |             |            |      |
| rs1111830 | 794625 | 1  | 219653869 | A | G | rs11115176 | C    | T          | 0.4182 | 1.4100 | 0.7700 | 0.0015  | 0.0081 | 0.8500  | 0.0019076  | 0.0161372 | 0.91       | -0.00460113 | 0.00392536 | 0.24        |            |      |
| rs1112876 | 690962 | 3  | 15873407  | A | G | rs11118308 | G    | A          | 0.3740 | 1.3039 | 0.7700 | 0.0104  | 0.0075 | 0.1700  | -0.0071899 | 0.0149304 | 0.63       | -0.00059305 | 0.00363336 | 0.87        |            |      |
| rs1115091 | 781716 | 3  | 3749528   | A | G | rs11128760 | A    | G          | 1.1555 | 1.2453 | 0.3500 | 0.0200  | 0.0071 | 0.0051  | -0.0076273 | 0.014261  | 0.59       | -0.00428415 | 0.00344123 | 0.2         |            |      |
| rs1117270 | 681630 | 12 | 39982413  | A | G | rs11150911 | C    | A          | 0.3558 | 1.3108 | 0.7900 | 0.0037  | 0.0075 | 0.6200  | 0.0127645  | 0.0149132 | 0.39       | -0.00553958 | 0.00360931 | 0.12        |            |      |
| rs1119066 | 690855 | 10 | 104252136 | T | C | rs11172702 | A    | G          | 1.4153 | 1.3293 | 0.2900 | 0.0006  | 0.0076 | 0.9400  | -0.0036674 | 0.0151514 | 0.81       | 0.00225575  | 0.00365585 | 0.54        |            |      |
| rs1120866 | 691220 | 1  | 65987164  | C | G | rs11190661 | C    | T          | 0.3987 | 1.3017 | 0.7600 | 0.0042  | 0.0074 | 0.5700  | 0.00952194 | 0.0148416 | 0.52       | 0.000383627 | 0.00359089 | 0.91        |            |      |
| rs1123154 | 613180 | 11 | 55686588  | G | A | rs11208660 | 0.80 | rs11208660 | T      | C      | 2.4205 | 2.3064  | 0.2900 | 0.0123  | 0.0131     | 0.3500    | 0.0147421  | 0.0262114   | 0.57       | -0.0034571  | 0.006359   | 0.59 |
| rs1125007 | 566163 | 8  | 10647823  | A | G |            |      |            |        |        |        |         |        |         |            |           |            |             |            |             |            |      |
| rs1125135 | 690804 | 10 | 2585792   | G | A | rs4321967  | 0.67 | rs4321967  | T      | C      | 2.3186 | 1.2128  | 0.0560 | -0.0080 | 0.0069     | 0.2500    | -0.0141186 | 0.0138073   | 0.31       | -0.00404015 | 0.0035119  | 0.23 |
| rs1125993 | 703399 | 15 | 84580156  | G | A |            |      |            |        |        |        |         |        |         |            |           |            |             |            |             |            |      |
| rs1149612 | 684574 | 7  | 103417557 | T | C | rs11259933 | G    | A          | 2.2268 | 1.3256 | 0.0930 | 0.0053  | 0.0076 | 0.4800  | 0.00012464 | 0.0151326 | 0.99       | -0.00438352 | 0.00366763 | 0.23        |            |      |
| rs1157717 | 790199 | 1  | 155983710 | G | A | rs11496125 | T    | C          | 0.8186 | 1.2218 | 0.5000 | -0.0014 | 0.0070 | 0.8400  | -0.0111955 | 0.0139398 | 0.42       | 0.00116774  | 0.00338464 | 0.73        |            |      |
| rs1158103 | 688665 | 1  | 101024370 | G | A |            |      |            |        |        |        |         |        |         |            |           |            |             |            |             |            |      |
| rs1158312 | 784393 | 1  | 38053458  | T | C | rs1158103  | G    | A          | 1.2502 | 1.2819 | 0.3300 | 0.0091  | 0.0073 | 0.2200  | 0.0364434  | 0.0146725 | 0.013      | 0.000742719 | 0.00353714 | 0.83        |            |      |
| rs1159047 | 685475 | 1  | 174972588 | C | T | rs11583122 | T    | C          | 1.8031 | 7.8322 | 0.8200 | 0.0195  | 0.0483 | 0.6900  | 0.0907473  | 0.0963824 | 0.35       | -0.0163801  | 0.0225533  | 0.47        |            |      |
| rs1160095 | 691086 | 11 | 64082807  | C | T | rs11590474 | C    | T          | 1.7331 | 2.8595 | 0.5400 | 0.0095  | 0.0163 | 0.5600  | -0.0367874 | 0.0326997 | 0.26       | -0.0188759  | 0.00792697 | 0.017       |            |      |
| rs1161124 | 779823 | 12 | 939480    | T | G | rs11600990 | T    | C          | 1.8220 | 1.8506 | 0.3200 | -0.0064 | 0.0106 | 0.5400  | 0.00262931 | 0.0211007 | 0.9        | -0.00239158 | 0.00514941 | 0.64        |            |      |
| rs1161145 | 690148 | 12 | 108413828 | G | A | rs11611246 | G    | T          | 1.6160 | 1.3185 | 0.2200 | -0.0051 | 0.0076 | 0.5000  | 0.00484932 | 0.0150887 | 0.75       | -0.00069066 | 0.00368716 | 0.85        |            |      |
| rs1162978 | 690824 | 15 | 66741387  | C | A | rs11113659 | 0.68 | rs11113659 | C      | A      | 1.8458 | 1.5522  | 0.2300 | 0.0014  | 0.0089     | 0.8800    | 0.0206836  | 0.0177421   | 0.24       | -0.00122213 | 0.00432444 | 0.78 |
| rs1163567 | 688719 | 15 | 63793238  | T | G | rs78136741 | 1.00 | rs78136741 | A      | G      | 0.9373 | 1.5082  | 0.5300 | -0.0081 | 0.0087     | 0.3500    | -0.0151749 | 0.0172696   | 0.38       | -0.00407257 | 0.00421984 | 0.33 |
| rs1164200 | 691916 | 16 | 71899586  | G | A |            |      |            |        |        |        |         |        |         |            |           |            |             |            |             |            |      |
| rs1165976 | 690582 | 18 | 53335512  | T | A | rs11642001 | G    | A          | 0.8721 | 1.4322 | 0.5400 | 0.0123  | 0.0082 | 0.1300  | 0.0281091  | 0.0163779 | 0.086      | -0.00101964 | 0.00398223 | 0.8         |            |      |
| rs1166830 | 691176 | 19 | 31016196  | A | G |            |      |            |        |        |        |         |        |         |            |           |            |             |            |             |            |      |
| rs1167266 | 768426 | 19 | 46180184  | C | T | rs73022877 | 0.94 | rs73022877 | A      | T      | 2.2044 | 7.2794  | 0.7600 | 0.0065  | 0.0412     | 0.8700    | 0.0982463  | 0.0821732   | 0.23       | -0.0238715  | 0.0211003  | 0.26 |
| rs1171133 | 687496 | 3  | 21784904  | T | A | rs11672660 | T    | C          | 0.0174 | 1.4658 | 0.9900 | 0.0022  | 0.0084 | 0.7900  | -0.0107758 | 0.0167688 | 0.52       | -0.00303205 | 0.00409511 | 0.46        |            |      |
| rs1173622 | 691580 | 4  | 147376205 | A | T | rs11711337 | A    | T          | 0.0579 | 1.2599 | 0.9600 | 0.0019  | 0.0072 | 0.8000  | 0.0180349  | 0.0143863 | 0.21       | 0.00376126  | 0.00348756 | 0.28        |            |      |
| rs1175208 | 790084 | 6  | 20705590  | T | G | rs11736228 | A    | T          | 1.1534 | 1.4919 | 0.4400 | -0.0024 | 0.0085 | 0.7800  | -0.0150247 | 0.017035  | 0.38       | -0.00058961 | 0.00410842 | 0.89        |            |      |
| rs1175665 | 659948 | 6  | 50054296  | G | C | rs11753081 | T    | G          | 0.4932 | 1.1965 | 0.6800 | 0.0010  | 0.0068 | 0.8900  | 0.00455357 | 0.0136366 | 0.74       | -2.9436E-05 | 0.00330835 | 0.99        |            |      |
| rs1177336 | 690588 | 7  | 14768180  | C | T |            |      |            |        |        |        |         |        |         |            |           |            |             |            |             |            |      |
| rs1178060 | 780840 | 6  | 50914343  | A | G | rs11773362 | T    | C          | 0.0543 | 1.2314 | 0.9600 | -0.0022 | 0.0070 | 0.7500  | 0.0122436  | 0.0140298 | 0.38       | -0.00111444 | 0.00341119 | 0.74        |            |      |
| rs1178122 | 789828 | 8  | 23895971  | T | C | rs72901027 | 0.91 | rs72901027 | G      | A      | 3.0061 | 7.2796  | 0.6800 | -0.0151 | 0.0412     | 0.7100    | -0.0436517 | 0.0821207   | 0.6        | -0.0193011  | 0.0026815  | 0.35 |
| rs1178165 | 784642 | 8  | 118863061 | C | T | rs11781222 | T    | C          | 1.6100 | 1.3186 | 0.2200 | 0.0029  | 0.0075 | 0.7000  | -0.0147939 | 0.0150283 | 0.32       | -0.00666707 | 0.00363874 | 0.067       |            |      |
| rs1178324 | 790309 | 8  | 10788875  | C | T | rs72673939 | 0.98 | rs72673939 | C      | G      | 1.7609 | 3.3225  | 0.6000 | 0.0096  | 0.0189     | 0.6100    | -0.065143  | 0.0377365   | 0.084      | -0.00836159 | 0.00918189 | 0.36 |
| rs1179028 | 684876 | 9  | 14651283  | C | T |            |      |            |        |        |        |         |        |         |            |           |            |             |            |             |            |      |
| rs1179206 | 644252 | 9  | 140646121 | A | G | rs11790280 | C    | T          | 1.9737 | 1.4923 | 0.1900 | -0.0136 | 0.0085 | 0.1100  | -0.0322435 | 0.0170129 | 0.058      | 0.000856831 | 0.00412898 | 0.84        |            |      |
| rs1180311 | 662659 | 1  | 174002465 | T | A | rs11792069 | G    | A          | 1.2915 | 5.3668 | 0.8100 | 0.0405  | 0.0307 | 0.1900  | -0.0346625 | 0.0617053 | 0.57       | 0.00382396  | 0.0151707  | 0.8         |            |      |
| rs1184466 | 686135 | 14 | 65910844  | C | T |            |      |            |        |        |        |         |        |         |            |           |            |             |            |             |            |      |
| rs1185585 | 682564 | 15 | 78012618  | C | G | rs11844662 | C    | G          | 0.7736 | 1.9875 | 0.7000 | 0.0076  | 0.0113 | 0.5000  | 0.00073603 | 0.0225714 | 0.97       | -0.00469237 | 0.00552686 | 0.4         |            |      |
| rs1186681 | 792501 | 16 | 387867    | C | T | rs11855821 | 0.84 | rs11855821 | A      | G      | 1.7174 | 3.0054  | 0.5700 | 0.0229  | 0.0172     | 0.1800    | 0.0291955  | 0.0341914   | 0.39       | 0.000469316 | 0.00851515 | 0.96 |
| rs1188953 | 688977 | 2  | 220163543 | A | G | rs11866815 | T    | C          | 1.5402 | 1.5177 | 0.3100 | -0.0083 | 0.0087 | 0.3400  | 0.0276046  | 0.0173535 | 0.11       | -0.00263812 | 0.00427301 | 0.54        |            |      |
| rs1191537 | 690829 | 3  | 7053959   | C | A | rs11889536 | G    | A          | 1.2157 | 2.0437 | 0.5500 | 0.0028  | 0.0117 | 0.8100  | -0.0049556 | 0.0232697 | 0.83       | 0.00627166  | 0.005686   | 0.27        |            |      |
| rs1192902 | 675947 | 3  | 51754424  | T | G | rs11915371 | C    | A          | 1.7125 | 2.3601 | 0.4700 | -0.0376 | 0.0135 | 0.0054  | 0.0117182  | 0.0270089 | 0.66       | -0.00902353 | 0.00654279 | 0.17        |            |      |
| rs1194588 | 682451 | 4  | 65700865  | G | A |            |      |            |        |        |        |         |        |         |            |           |            |             |            |             |            |      |
| rs1197104 | 689741 | 7  | 26698848  | G | A | rs11945861 | A    | G          | 2.5778 | 1.1992 | 0.0320 | -0.0004 | 0.0068 | 0.9600  | 0.0236018  | 0.0136967 | 0.085      | -0.00328377 | 0.00329426 | 0.32        |            |      |
| rs1198738 | 688014 | 8  | 15197115  | C | A |            |      |            |        |        |        |         |        |         |            |           |            |             |            |             |            |      |
| rs1203325 | 664083 | 1  | 112318484 | A | G | rs7819078  | 0.83 | rs7819078  | G      | A      | 1.5059 | 3.6312  | 0.6800 | -0.0108 | 0.0208     | 0.6000    | 0.0112153  | 0.0416682   | 0.79       | 0.000376722 | 0.0104325  | 0.97 |
| rs120     |        |    |           |   |   |            |      |            |        |        |        |         |        |         |            |           |            |             |            |             |            |      |





|           |        |    |           |   |   |   |            |      |            |   |   |            |        |        |         |        |        |            |           |        |             |            |       |             |            |       |
|-----------|--------|----|-----------|---|---|---|------------|------|------------|---|---|------------|--------|--------|---------|--------|--------|------------|-----------|--------|-------------|------------|-------|-------------|------------|-------|
| rs1755197 | 691115 | 2  | 142293146 | C | A | * | rs7574682  | 0.62 | rs7574682  | A | C | 1.1053     | 1.2453 | 0.3700 | -0.0102 | 0.0071 | 0.1500 | -0.0028886 | 0.01418   | 0.84   | 0.00532283  | 0.00342725 | 0.12  |             |            |       |
| rs1759177 | 685869 | 5  | 86420392  | A | G |   |            |      |            |   |   | 0.3512     | 1.4259 | 0.8100 | 0.0062  | 0.0082 | 0.4500 | 0.0363685  | 0.0163021 | 0.0226 | 0.00698332  | 0.00393751 | 0.76  |             |            |       |
| rs1760815 | 791472 | 12 | 110046698 | T | C |   |            |      |            |   |   | 1.5648     | 3.3982 | 0.6500 | -0.0176 | 0.0194 | 0.3600 | -0.0178425 | 0.0387515 | 0.65   | -0.00655684 | 0.00941072 | 0.49  |             |            |       |
| rs1763603 | 782807 | 10 | 126594078 | C | T | * |            |      |            |   |   |            |        |        |         |        |        |            |           |        |             |            |       |             |            |       |
| rs1768145 | 692317 | 3  | 114399296 | G | A |   |            |      |            |   |   | rs17681451 | A      | G      | 3.5491  | 5.5720 | 0.5200 | 0.0242     | 0.0322    | 0.4500 | -0.0101883  | 0.0641355  | 0.87  | 0.0215141   | 0.0150154  | 0.15  |
| rs176817C | 692361 | 17 | 9792872   | C | T |   |            |      |            |   |   | rs17681708 | C      | T      | 1.9004  | 4.4441 | 0.6700 | 0.0491     | 0.0252    | 0.0510 | 0.0269561   | 0.0501705  | 0.59  | -0.0123201  | 0.0121205  | 0.51  |
| rs1772495 | 785851 | 19 | 18454825  | A | G |   |            |      |            |   |   | 1.3006     | 1.1697 | 0.2700 | 0.0055  | 0.0067 | 0.4100 | -0.0124483 | 0.0133418 | 0.35   | -0.00208125 | 0.00323863 | 0.62  |             |            |       |
| rs1773925 | 692334 | 6  | 27293049  | C | G | * | rs55797265 | 0.99 | rs55797265 | T | C | 1.1746     | 1.9629 | 0.5500 | -0.0068 | 0.0112 | 0.5400 | 0.0610384  | 0.0223672 | 0.0064 | -0.0042869  | 0.00539341 | 0.43  |             |            |       |
| rs1775797 | 690716 | 6  | 38214150  | C | G |   |            |      |            |   |   | 2.6327     | 5.8037 | 0.6500 | -0.0020 | 0.0329 | 0.9500 | -0.0325984 | 0.0654809 | 0.62   | -0.0139399  | 0.0158428  | 0.38  |             |            |       |
| rs1779593 | 794950 | 16 | 51926509  | C | T |   |            |      |            |   |   | rs17795934 | T      | C      | 1.7599  | 1.2969 | 0.1700 | 0.0005     | 0.0074    | 0.9400 | 0.0208849   | 0.0148403  | 0.16  | 0.00160952  | 0.00360384 | 0.96  |
| rs1780637 | 690043 | 20 | 51107290  | C | T |   |            |      |            |   |   | rs17806379 | T      | C      | 1.9170  | 1.6974 | 0.2600 | 0.0166     | 0.0097    | 0.0860 | 0.0268482   | 0.0192744  | 0.16  | -0.00148674 | 0.00360672 | 0.75  |
| rs1782082 | 690065 | 9  | 11831420  | T | G | * | rs10809628 | 0.64 | rs10809628 | T | A | 1.6928     | 1.7489 | 0.3300 | 0.0060  | 0.0100 | 0.5500 | -0.0271055 | 0.019844  | 0.17   | -0.00105773 | 0.00481661 | 0.83  |             |            |       |
| rs1782507 | 692310 | 11 | 30243868  | G | T | * |            |      |            |   |   | rs1782767  | C      | G      | 1.5246  | 2.5921 | 0.5600 | 0.0168     | 0.0148    | 0.2600 | -0.0023761  | 0.0295468  | 0.94  | -0.0122642  | 0.00710866 | 0.084 |
| rs1787267 | 692052 | 18 | 76742544  | G | C |   |            |      |            |   |   |            |        |        |         |        |        |            |           |        |             |            |       |             |            |       |
| rs1789165 | 775128 | 11 | 69481069  | A | C | * |            |      |            |   |   |            |        |        |         |        |        |            |           |        |             |            |       |             |            |       |
| rs1791253 | 684367 | 18 | 37103550  | T | G |   |            |      |            |   |   | rs1791253  | T      | G      | 1.1833  | 1.3317 | 0.3700 | -0.0108    | 0.0076    | 0.1600 | 0.0036985   | 0.0151773  | 0.81  | 0.00182077  | 0.00358665 | 0.62  |
| rs181417C | 686628 | 7  | 138794149 | A | T | * | rs62485917 | 0.83 | rs62485917 | T | C | 1.6910     | 1.2272 | 0.1700 | 0.0014  | 0.0070 | 0.8400 | -0.0123948 | 0.0140003 | 0.38   | 0.0052798   | 0.00340081 | 0.12  |             |            |       |
| rs181732  | 686436 | 3  | 136744386 | G | T | * | rs900949   | 0.72 | rs900949   | G | T | 0.7555     | 1.3948 | 0.5900 | -0.0199 | 0.0080 | 0.8100 | -0.0206407 | 0.0158998 | 0.19   | -0.00352612 | 0.00386863 | 0.66  |             |            |       |
| rs1819844 | 793238 | 12 | 68205604  | A | G |   |            |      |            |   |   | rs1819844  | A      | G      | 0.6588  | 1.2913 | 0.6400 | -0.1130    | 0.0079    | 0.1000 | -0.0160644  | 0.0158398  | 0.31  | 0.00315371  | 0.00386064 | 0.41  |
| rs185200E | 692290 | 7  | 77829768  | G | A |   |            |      |            |   |   | rs185200E  | G      | A      | 2.0059  | 1.2060 | 0.0960 | -0.0024    | 0.0069    | 0.7300 | 0.00441287  | 0.0137576  | 0.75  | -0.00239104 | 0.0032187  | 0.47  |
| rs1853635 | 673714 | 6  | 87606842  | G | A |   |            |      |            |   |   | rs1853639  | A      | G      | 0.2126  | 1.2033 | 0.8600 | -0.0088    | 0.0069    | 0.2000 | -0.0021201  | 0.0137274  | 0.88  | -0.00249589 | 0.00331676 | 0.45  |
| rs1862451 | 691653 | 16 | 24803620  | A | G | * | rs964782   | 1.00 | rs964782   | C | T | 1.9156     | 1.9786 | 0.2800 | -0.0191 | 0.0102 | 0.0600 | -0.0106985 | 0.0203423 | 0.6    | -0.00644103 | 0.00499796 | 0.52  |             |            |       |
| rs1865341 | 688863 | 9  | 8485911   | T | C |   |            |      |            |   |   | rs1865341  | T      | C      | 0.1013  | 1.6210 | 0.9500 | -0.0165    | 0.0093    | 0.0750 | -0.0249319  | 0.018477   | 0.18  | 0.006069718 | 0.00450077 | 0.88  |
| rs186543  | 682722 | 5  | 86754835  | G | C |   |            |      |            |   |   | rs186543   | G      | C      | 1.3662  | 1.2040 | 0.2600 | -0.0003    | 0.0069    | 0.9600 | 0.00351052  | 0.0137465  | 0.8   | -0.00040633 | 0.00334107 | 0.59  |
| rs186651C | 691901 | 4  | 44514468  | C | T | * |            |      |            |   |   | rs1866510  | T      | C      | 1.1941  | 1.1885 | 0.3200 | -0.0088    | 0.0068    | 0.1900 | 0.0026815   | 0.0135391  | 0.84  | 0.00167183  | 0.00328862 | 0.61  |
| rs1884385 | 683669 | 20 | 1410582   | C | T | * |            |      |            |   |   |            |        |        |         |        |        |            |           |        |             |            |       |             |            |       |
| rs1884897 | 789534 | 20 | 6612832   | G | A | * |            |      |            |   |   |            |        |        |         |        |        |            |           |        |             |            |       |             |            |       |
| rs1896685 | 794654 | 7  | 121964349 | T | C |   |            |      |            |   |   | rs1896689  | C      | T      | 1.3990  | 1.2201 | 0.2500 | -0.0025    | 0.0070    | 0.7200 | -0.0217823  | 0.013956   | 0.12  | -0.00097667 | 0.00339393 | 0.77  |
| rs1899951 | 795281 | 3  | 12394840  | T | C |   |            |      |            |   |   | rs1899951  | T      | C      | 1.6194  | 2.7796 | 0.5600 | -0.0159    | 0.0160    | 0.3200 | -0.0188294  | 0.0317846  | 0.55  | 0.0139005   | 0.0077306  | 0.72  |
| rs1903575 | 690564 | 4  | 91253965  | C | G | * | rs10008665 | 1.00 | rs10008665 | G | A | 0.1643     | 1.5185 | 0.9100 | -0.0062 | 0.0087 | 0.4700 | 0.00173127 | 0.017352  | 0.92   | 0.00125514  | 0.00418173 | 0.076 |             |            |       |
| rs190598E | 676854 | 3  | 124687767 | G | T |   |            |      |            |   |   | rs1905986  | T      | G      | 0.2394  | 1.3670 | 0.8600 | -0.0048    | 0.0078    | 0.5400 | -0.0174323  | 0.0155577  | 0.26  | -0.00216702 | 0.00376164 | 0.56  |
| rs192779C | 794326 | 13 | 96922191  | C | T |   |            |      |            |   |   | rs1927790  | C      | T      | 0.3558  | 1.2589 | 0.7800 | -0.0010    | 0.0072    | 0.8900 | 0.00193748  | 0.0143292  | 0.89  | -0.00066312 | 0.00348067 | 0.85  |
| rs1928295 | 793649 | 9  | 120378483 | T | C |   |            |      |            |   |   | rs1928295  | C      | T      | 0.4114  | 1.2106 | 0.7300 | -0.0023    | 0.0069    | 0.7400 | 0.00545397  | 0.0137773  | 0.69  | 0.00347819  | 0.00334393 | 0.3   |
| rs1937684 | 690063 | 10 | 53680085  | A | C |   |            |      |            |   |   | rs1937684  | A      | C      | 0.4891  | 1.2248 | 0.6900 | 0.0050     | 0.0070    | 0.4700 | 0.0102525   | 0.0140023  | 0.46  | -0.00483621 | 0.00341654 | 0.16  |
| rs1941697 | 692446 | 18 | 31251276  | A | G | * | rs12456504 | 0.74 | rs12456504 | G | T | 0.9330     | 1.4137 | 0.5100 | -0.0182 | 0.0081 | 0.0240 | -0.0253471 | 0.0161133 | 0.12   | -0.00438801 | 0.00391815 | 0.26  |             |            |       |
| rs1942866 | 781260 | 18 | 57741783  | G | C | * | rs8092496  | 0.67 | rs8092496  | A | G | 1.9191     | 1.5223 | 0.2100 | 0.0110  | 0.0087 | 0.2100 | 0.01071716 | 0.0173471 | 0.54   | -0.00248016 | 0.00419022 | 0.55  |             |            |       |
| rs1943477 | 793263 | 11 | 56973793  | C | T | * |            |      |            |   |   | rs1943477  | T      | C      | 1.1875  | 5.1266 | 0.8200 | 0.0138     | 0.0290    | 0.6400 | 0.0242816   | 0.0583324  | 0.68  | -0.00253799 | 0.0141355  | 0.86  |
| rs1951455 | 690040 | 14 | 91512339  | C | T |   |            |      |            |   |   | rs1951455  | T      | C      | 1.9691  | 1.5926 | 0.2200 | 0.0175     | 0.0091    | 0.0530 | 0.00192015  | 0.0181003  | 0.92  | 0.00333795  | 0.00439903 | 0.45  |
| rs1956151 | 692204 | 14 | 40101060  | G | A | * |            |      |            |   |   | rs1956151  | G      | A      | 1.3631  | 1.2976 | 0.2900 | 0.0100     | 0.0074    | 0.1800 | 0.0143997   | 0.0147815  | 0.33  | -0.00302196 | 0.0036097  | 0.4   |
| rs1973993 | 692549 | 1  | 96943994  | C | T | * |            |      |            |   |   |            |        |        |         |        |        |            |           |        |             |            |       |             |            |       |
| rs1982441 | 687705 | 8  | 28021769  | T | G |   |            |      |            |   |   |            |        |        |         |        |        |            |           |        |             |            |       |             |            |       |
| rs1983864 | 692553 | 10 | 100017453 | T | G | * |            |      |            |   |   | rs1983864  | T      | G      | 0.8342  | 1.2183 | 0.4900 | 0.0111     | 0.0070    | 0.1100 | -0.0025806  | 0.0139213  | 0.85  | 0.000841151 | 0.00337703 | 0.8   |
| rs200074E | 675837 | 18 | 57677294  | A | G | * |            |      |            |   |   |            |        |        |         |        |        |            |           |        |             |            |       |             |            |       |
| rs200361E | 684693 | 14 | 79903993  | T | G | * | rs17758369 | 0.89 | rs17758369 | A | G | 2.1370     | 1.5674 | 0.1700 | 0.0053  | 0.0089 | 0.5500 | -0.0044442 | 0.0178475 | 0.8    | -0.00107191 | 0.00432055 | 0.18  |             |            |       |
| rs200968  | 795566 | 6  | 27805968  | C | T |   |            |      |            |   |   | rs200968   | T      | C      | 2.0687  | 2.3118 | 0.3700 | 0.0090     | 0.0132    | 0.4900 | -0.0376991  | 0.0263527  | 0.15  | -0.00022236 | 0.00699909 | 0.07  |
| rs2010281 | 794009 | 14 | 103862322 | G | A |   |            |      |            |   |   | rs2010281  | A      | G      | 2.1179  | 1.6960 | 0.2100 | 0.0057     | 0.0097    | 0.5500 | 0.0103628   | 0.0192979  | 0.59  | -0.00484911 | 0.00471154 | 0.3   |
| rs2012927 | 792270 | 18 | 63292762  | A | G | * |            |      |            |   |   | rs2012927  | A      | G      | 0.6455  | 1.2271 | 0.6000 | 0.0002     | 0.0070    | 0.9800 | 0.00773919  | 0.0140114  | 0.58  | -0.00321842 | 0.00340346 | 0.34  |
| rs2030342 | 686857 | 1  | 97388226  | T | C | * | rs6671669  | 0.90 | rs6671669  | G | A | 1.2415     | 1.2445 | 0.3200 | 0.0068  | 0.0071 | 0.3400 | 0.00716121 | 0.0141892 | 0.61   | -0.00254713 | 0.00344281 | 0.46  |             |            |       |
| rs2033525 | 792112 | 6  | 40348653  | G | A | * |            |      |            |   |   |            |        |        |         |        |        |            |           |        |             |            |       |             |            |       |
| rs2047632 | 688132 | 3  | 37153431  | G | C | * |            |      |            |   |   |            |        |        |         |        |        |            |           |        |             |            |       |             |            |       |
| rs2075205 | 691296 | 16 | 54153099  | A | T |   |            |      |            |   |   | rs2075205  | A      | T      | 1.4172  | 1.1894 | 0.2300 | 0.0040     | 0.0068    | 0.5600 | -0.0117602  | 0.0136026  | 0.39  | 0.00182265  | 0.00330059 | 0.58  |
| rs207565C | 779741 | 19 | 45935619  | A | G |   |            |      |            |   |   | rs2075650  | A      | G      | 1.2352  | 2.0914 | 0.5500 | -0.0004    | 0.0120    | 0.9700 | 0.00533231  | 0.024019   | 0.82  | 0.00984045  | 0.00578888 | 0.89  |
| rs208015  | 691575 | 17 | 46252346  | T | C |   |            |      |            |   |   | rs208015   | T      | C      | 0.2308  | 1.6316 | 0.8900 | -0.0082    | 0.0093    | 0.3800 | -0.0173716  | 0.0186445  | 0.35  | 0.00552118  | 0.00455084 | 0.22  |
| rs2080454 | 784784 | 16 | 49062590  | C | A | * |            |      |            |   |   |            |        |        |         |        |        |            |           |        |             |            |       |             |            |       |
| rs209861E | 657277 | 5  | 87934851  | T | A | * | rs59782145 | 0.93 | rs59782145 | T | C | 1.4584     | 5.7378 | 0.8000 | 0.0291  | 0.0325 | 0.3700 | -0.001662  | 0.0647604 | 0.98   | -0.0010267  | 0.0168308  | 0.95  |             |            |       |
| rs2100814 | 683658 | 8  | 28118130  | A | G | * |            |      |            |   |   | rs210      |        |        |         |        |        |            |           |        |             |            |       |             |            |       |

|           |        |    |           |   |   |   |            |      |            |   |   |           |        |        |         |         |        |            |            |           |             |             |            |         |
|-----------|--------|----|-----------|---|---|---|------------|------|------------|---|---|-----------|--------|--------|---------|---------|--------|------------|------------|-----------|-------------|-------------|------------|---------|
| rs2307111 | 795430 | 5  | 75003678  | T | C | * | rs9942416  | 0.62 | rs9942416  | G | C |           | 0.5931 | 1.2018 | 0.6200  | 0.0009  | 0.0069 | 0.9000     | -0.0034474 | 0.0137438 | 0.8         | 0.000415391 | 0.00332326 | 0.9     |
| rs2356865 | 691741 | 1  | 50836334  | C | T | * |            |      |            |   |   |           |        |        |         |         |        |            |            |           |             |             |            |         |
| rs235776C | 791053 | 6  | 120213880 | A | G | * | rs6927250  | 0.92 | rs6927250  | G | T |           | 2.3566 | 1.3193 | 0.0740  | -0.0092 | 0.0075 | 0.2200     | -0.0011002 | 0.0150344 | 0.94        | -0.00488872 | 0.00361918 | 0.18    |
| rs236538S | 783625 | 3  | 61236462  | C | T | * | rs13099397 | 0.66 | rs13099397 | C | A |           | 2.2876 | 1.5920 | 0.1500  | 0.0045  | 0.0091 | 0.6200     | -0.0491902 | 0.0181367 | 0.0067      | 0.00638888  | 0.00439522 | 0.15    |
| rs2367112 | 794305 | 5  | 64168193  | T | G |   |            |      |            |   |   | 0.1690    | 1.6928 | 0.9200 | 0.0008  | 0.0096  | 0.9300 | 0.0132049  | 0.0192347  | 0.49      | -0.00355821 | 0.00466895  | 0.45       |         |
| rs2386802 | 688877 | 20 | 25971327  | C | A |   |            |      |            |   |   | 0.7160    | 1.2258 | 0.5600 | -0.0020 | 0.0070  | 0.7700 | 0.0115102  | 0.0140033  | 0.41      | -0.00120031 | 0.00337749  | 0.97       |         |
| rs2397061 | 688481 | 6  | 51638877  | C | T |   |            |      |            |   |   | 1.0382    | 1.8921 | 0.5800 | 0.0100  | 0.0108  | 0.3500 | -0.0004816 | 0.0215922  | 0.98      | -0.00507038 | 0.00521564  | 0.33       |         |
| rs240973C | 788962 | 8  | 11060638  | C | A | * |            |      |            |   |   |           |        |        |         |         |        |            |            |           |             |             |            |         |
| rs2412107 | 686465 | 14 | 65426216  | T | G |   |            |      |            |   |   | rs2412107 | G      | T      |         | 0.6734  | 1.1986 | 0.5700     | 0.0050     | 0.0068    | 0.4700      | 0.00163824  | 0.0136724  | 0.9     |
| rs2425241 | 689885 | 20 | 35018412  | C | T | * |            |      |            |   |   |           |        |        |         |         |        |            |            |           |             |             |            |         |
| rs2425857 | 690825 | 20 | 44914134  | A | G |   |            |      |            |   |   | rs2425857 | G      | A      |         | 0.1381  | 1.2489 | 0.9100     | 0.0082     | 0.0071    | 0.2500      | 0.021011    | 0.0142532  | 0.14    |
| rs242915C | 686276 | 12 | 2152655   | C | A |   |            |      |            |   |   | rs2429150 | C      | A      |         | 1.1404  | 1.3127 | 0.3800     | -0.0138    | 0.0075    | 0.0660      | 0.00827123  | 0.0149832  | 0.58    |
| rs244088S | 689699 | 11 | 70563286  | A | G |   |            |      |            |   |   | rs244088S | A      | G      |         | 1.1672  | 1.2976 | 0.3700     | -0.0034    | 0.0074    | 0.6500      | 0.00286676  | 0.0148187  | 0.85    |
| rs245935S | 677935 | 15 | 76863838  | C | G | * |            |      |            |   |   |           |        |        |         |         |        |            |            |           |             |             |            |         |
| rs246711C | 684290 | 12 | 23067302  | C | T |   |            |      |            |   |   | rs2467110 | C      | T      |         | 0.6952  | 1.3892 | 0.6200     | -0.0032    | 0.0079    | 0.6900      | -0.0359705  | 0.0158345  | 0.023   |
| rs247995S | 664268 | 13 | 111984244 | A | G | * |            |      |            |   |   |           |        |        |         |         |        |            |            |           |             |             |            |         |
| rs248139  | 683675 | 5  | 167352783 | A | G |   |            |      |            |   |   | rs248139  | A      | G      |         | 0.9133  | 1.3294 | 0.4900     | -0.0144    | 0.0076    | 0.0580      | -0.0243989  | 0.0151537  | 0.11    |
| rs248166S | 795247 | 1  | 62594677  | T | C | * | rs17379217 | 0.72 | rs17379217 | T | T |           | 1.1012 | 1.7111 | 0.5200  | -0.0160 | 0.0098 | 0.1000     | -0.0161912 | 0.0196112 | 0.41        | 0.00151336  | 0.00475389 | 0.75    |
| rs2491864 | 690625 | 1  | 242986063 | A | G |   |            |      |            |   |   | rs2491864 | A      | G      |         | 1.4790  | 1.2002 | 0.2200     | -0.0067    | 0.0069    | 0.3300      | 0.00565907  | 0.0136991  | 0.68    |
| rs2504674 | 690877 | 6  | 51160682  | G | C |   |            |      |            |   |   | rs2504674 | G      | C      |         | 1.4657  | 1.1994 | 0.2200     | -0.0043    | 0.0069    | 0.5300      | 0.0163949   | 0.0137161  | 0.23    |
| rs251673S | 761216 | 16 | 2097158   | G | A |   |            |      |            |   |   | rs2516739 | G      | A      |         | 3.9276  | 2.9875 | 0.1900     | 0.0151     | 0.0171    | 0.3800      | 0.0324111   | 0.0341558  | 0.34    |
| rs253476C | 677641 | 16 | 6509097   | T | A | * | rs1935397  | 0.99 | rs1935397  | C | T |           | 0.6697 | 1.3593 | 0.6200  | -0.0074 | 0.0078 | 0.3400     | -0.0024386 | 0.0155499 | 0.88        | -0.00337443 | 0.00376571 | 0.25    |
| rs2537847 | 689643 | 17 | 65694355  | G | A | * | rs2625567  | 0.64 | rs2625567  | T | C |           | 1.8397 | 1.6917 | 0.2800  | -0.0052 | 0.0097 | 0.5900     | -0.0336382 | 0.0193711 | 0.082       | 0.00806512  | 0.00467071 | 0.084   |
| rs2543132 | 688326 | 8  | 15536311  | C | G |   |            |      |            |   |   | rs2543132 | C      | G      |         | 1.0961  | 1.2028 | 0.3600     | 0.0111     | 0.0069    | 0.8800      | 0.0219674   | 0.0137     | 0.11    |
| rs254428  | 774996 | 5  | 14177439  | T | G |   |            |      |            |   |   | rs254428  | G      | T      |         | 0.5888  | 1.2555 | 0.6400     | 0.0033     | 0.0072    | 0.6400      | 0.0110845   | 0.0142958  | 0.44    |
| rs255832  | 692083 | 5  | 66175682  | A | G |   |            |      |            |   |   | rs255832  | G      | A      |         | 0.5732  | 1.1869 | 0.6300     | 0.0037     | 0.0068    | 0.5900      | 0.0169444   | 0.0135008  | 0.21    |
| rs2590942 | 793971 | 1  | 72885281  | T | G |   |            |      |            |   |   | rs2590942 | G      | T      |         | 1.6602  | 4.5727 | 0.7200     | 0.0336     | 0.0262    | 0.2000      | -0.035271   | 0.0523054  | 0.5     |
| rs259328C | 688016 | 15 | 76150965  | A | G |   |            |      |            |   |   | rs2593280 | A      | G      |         | 0.0512  | 1.7654 | 0.9800     | 0.0019     | 0.0101    | 0.8500      | 0.0520178   | 0.0202044  | 0.01    |
| rs2605603 | 790857 | 11 | 93221105  | G | A |   |            |      |            |   |   | rs2605603 | G      | A      |         | 0.1868  | 1.5626 | 0.9000     | 0.0018     | 0.0089    | 0.8400      | 0.0117395   | 0.0177525  | 0.51    |
| rs2611742 | 691646 | 5  | 95856501  | C | T |   |            |      |            |   |   | rs2611742 | C      | T      |         | 0.2612  | 1.2222 | 0.8300     | 0.0067     | 0.0070    | 0.3400      | -0.0039069  | 0.0139666  | 0.78    |
| rs2612203 | 515871 | 11 | 54914689  | A | G | * |            |      |            |   |   |           |        |        |         |         |        |            |            |           |             |             |            |         |
| rs261997E | 684417 | 17 | 71754545  | T | C |   |            |      |            |   |   | rs2619976 | C      | T      |         | 1.3782  | 1.3066 | 0.2900     | 0.0033     | 0.0075    | 0.6600      | 0.0210027   | 0.0148915  | 0.16    |
| rs262956  | 686884 | 3  | 183486117 | T | G | * |            |      |            |   |   |           |        |        |         |         |        |            |            |           |             |             |            |         |
| rs2631681 | 789736 | 10 | 93032943  | C | T | * | rs245044S  | 0.99 | rs245044S  | G | A |           | 1.3293 | 2.0470 | 0.5200  | -0.0017 | 0.0117 | 0.8900     | -0.0258613 | 0.0233137 | 0.27        | 0.00813643  | 0.00567094 | 0.15    |
| rs2634047 | 683222 | 8  | 85696337  | G | C | * | rs263404S  | 0.87 | rs263404S  | G | A |           | 4.2904 | 1.7809 | 0.0160  | -0.0050 | 0.0102 | 0.6300     | -0.0128554 | 0.0204121 | 0.53        | 3.29931E-05 | 0.00494801 | 0.99    |
| rs2635727 | 792938 | 6  | 50820940  | C | T | * | rs2817419  | 0.88 | rs2817419  | G | A |           | 2.0576 | 1.4372 | 0.1500  | 0.0024  | 0.0082 | 0.7700     | 0.03212    | 0.0163598 | 0.05        | -0.00342205 | 0.00399054 | 0.39    |
| rs265336S | 689811 | 6  | 55169801  | C | T |   |            |      |            |   |   | rs265336S | T      | C      |         | 3.0066  | 1.8205 | 0.8700     | -0.0188    | 0.0104    | 0.0710      | 0.00590912  | 0.0207483  | 0.78    |
| rs268064E | 686125 | 3  | 53777176  | T | C |   |            |      |            |   |   | rs2680648 | T      | C      |         | 0.4194  | 1.2956 | 0.7500     | 0.0083     | 0.0074    | 0.2600      | -0.0186752  | 0.0147475  | 0.21    |
| rs2710323 | 790805 | 3  | 52815905  | C | T |   |            |      |            |   |   | rs2710323 | C      | T      |         | 0.9875  | 1.2297 | 0.4200     | 0.0017     | 0.0070    | 0.8100      | 0.0527679   | 0.0140004  | 0.00016 |
| rs271166S | 690170 | 6  | 116662038 | A | C | * | rs2737251  | 1.00 | rs2737251  | C | T |           | 2.0655 | 1.2353 | 0.9950  | 0.0006  | 0.0071 | 0.9300     | -0.0212835 | 0.0141029 | 0.13        | 0.00452502  | 0.00342578 | 0.19    |
| rs2724861 | 780412 | 2  | 471514    | G | A |   |            |      |            |   |   | rs2724861 | A      | G      |         | 1.0857  | 1.2517 | 0.3900     | 0.0032     | 0.0072    | 0.6500      | 0.00240872  | 0.0142729  | 0.87    |
| rs2731222 | 690932 | 12 | 90595383  | A | C |   |            |      |            |   |   | rs2731222 | A      | C      |         | 3.6181  | 1.2026 | 0.0026     | -0.0021    | 0.0069    | 0.7600      | -0.0009058  | 0.0137116  | 0.95    |
| rs2732387 | 681730 | 12 | 41880909  | C | G |   | rs257911S  | 0.94 | rs257911S  | G | T |           | 0.7392 | 1.2217 | 0.5500  | -0.0113 | 0.0070 | 0.8500     | -0.0149075 | 0.0139329 | 0.28        | 0.00069277  | 0.00335987 | 0.86    |
| rs273504  | 690672 | 19 | 18215247  | G | A |   |            |      |            |   |   | rs273504  | A      | G      |         | 0.0514  | 1.2544 | 0.9700     | 0.0009     | 0.0072    | 0.9000      | -0.0054043  | 0.0143104  | 0.71    |
| rs273697  | 683992 | 18 | 23178748  | G | A |   |            |      |            |   |   | rs273697  | A      | G      |         | 0.3000  | 1.1883 | 0.8000     | -0.0117    | 0.0068    | 0.8100      | 0.0171223   | 0.0135432  | 0.21    |
| rs276895C | 754826 | 4  | 49064487  | A | G |   | rs7655341  | 0.91 | rs7655341  | T | C |           | 0.3356 | 1.2316 | 0.7900  | -0.0018 | 0.0070 | 0.8000     | 0.00424686 | 0.0140587 | 0.76        | 0.00195144  | 0.0034046  | 0.57    |
| rs278166E | 678717 | 6  | 131897278 | T | C |   |            |      |            |   |   | rs278166E | T      | C      |         | 1.9381  | 1.3319 | 0.1500     | 0.0120     | 0.0076    | 0.1200      | -0.0018627  | 0.015242   | 0.9     |
| rs2814992 | 794002 | 6  | 34617144  | G | A |   |            |      |            |   |   | rs2814992 | A      | G      |         | 0.3966  | 1.1890 | 0.7400     | -0.0009    | 0.0068    | 0.9000      | -0.001494   | 0.0135658  | 0.91    |
| rs2820311 | 691876 | 1  | 201841476 | G | A |   |            |      |            |   |   | rs2820311 | A      | G      |         | 0.7244  | 1.9369 | 0.7100     | -0.0139    | 0.0111    | 0.2100      | -0.0045768  | 0.0221955  | 0.84    |
| rs28350   | 686689 | 3  | 42418446  | A | G |   |            |      |            |   |   | rs28350   | A      | G      |         | 3.1834  | 2.5761 | 0.2200     | -0.0023    | 0.0147    | 0.8700      | 0.00229609  | 0.0292644  | 0.94    |
| rs2836961 | 793481 | 21 | 40627020  | C | A |   |            |      |            |   |   | rs2836961 | A      | C      |         | 0.3552  | 1.3628 | 0.7900     | 0.0095     | 0.0078    | 0.2300      | 0.00943168  | 0.0156154  | 0.55    |
| rs283800E | 686586 | 21 | 42635567  | C | T | * | rs1041448  | 0.99 | rs1041448  | A | G |           | 2.8832 | 1.7511 | 0.1000  | 0.0099  | 0.0100 | 0.3200     | -0.000151  | 0.0200458 | 0.99        | -0.00421788 | 0.00483462 | 0.38    |
| rs284227  | 792227 | 1  | 82379446  | C | T |   |            |      |            |   |   | rs284227  | C      | T      |         | 2.2386  | 2.3994 | 0.3500     | -0.0169    | 0.0136    | 0.2100      | -0.0485262  | 0.0271147  | 0.074   |
| rs284238S | 689031 | 6  | 19078274  | G | A |   |            |      |            |   |   | rs284238S | G      | A      |         | 0.2667  | 1.5052 | 0.8600     | 0.0092     | 0.0086    | 0.2900      | -0.0178436  | 0.0171848  | 0.3     |
| rs285096S | 691825 | 4  | 102183594 | C | T |   |            |      |            |   |   | rs2850969 | T      | C      |         | 0.5177  | 1.1862 | 0.6600     | -0.0066    | 0.0068    | 0.3300      | -0.0030767  | 0.0135285  | 0.82    |
| rs2863981 | 794282 | 16 | 68295598  | A | G | * |            |      |            |   |   |           |        |        |         |         |        |            |            |           |             |             |            |         |
| rs286681E | 688980 | 19 | 30683879  | T | C |   |            |      |            |   |   | rs286681E | T      | C      |         | 1.4176  | 1.2024 | 0.2400     | 0.0069     | 0.0069    | 0.3200      | -0.0111797  | 0.0137108  | 0.41    |
| rs287576E | 685199 | 6  | 124925032 | C | G |   |            |      |            |   |   | rs287576E | C      | G      |         | 0.8743  | 1.3343 | 0.5100     | 0.0067     | 0.0077    | 0.3800      | 0.0225166   | 0.0153128  | 0.14    |
| rs2890652 | 674785 | 2  | 142959931 | C | T |   |            |      |            |   |   | rs2890652 | C      | T      |         | 2.84    |        |            |            |           |             |             |            |         |



|           |        |    |           |   |   |            |      |            |           |           |        |         |        |         |            |           |            |             |             |             |             |             |            |      |
|-----------|--------|----|-----------|---|---|------------|------|------------|-----------|-----------|--------|---------|--------|---------|------------|-----------|------------|-------------|-------------|-------------|-------------|-------------|------------|------|
| rs4889782 | 684598 | 17 | 78640510  | C | T | rs4889782  | C    | T          | 1.2141    | 1.2614    | 0.3400 | -0.0086 | 0.0072 | 0.2300  | -0.0029902 | 0.0143802 | 0.84       | 7.65372E-06 | 0.00348401  | 1           |             |             |            |      |
| rs490690E | 691345 | 5  | 27040082  | G | T | rs4906908  | T    | G          | 1.1940    | 1.2376    | 0.3300 | 0.0024  | 0.0071 | 0.7400  | -0.016342  | 0.0141531 | 0.25       | -0.00422954 | 0.003441    | 0.22        |             |             |            |      |
| rs4916661 | 688639 | 15 | 87932809  | G | T | rs4916661  | G    | T          | 0.5729    | 1.3644    | 0.4700 | 0.0044  | 0.0078 | 0.5700  | -0.0023975 | 0.0155229 | 0.88       | -0.00999448 | 0.00374891  | 0.077       |             |             |            |      |
| rs4936175 | 692569 | 11 | 132641959 | C | T |            |      |            |           |           |        |         |        |         |            |           |            |             |             |             |             |             |            |      |
| rs4936671 | 678888 | 11 | 121942512 | C | T | rs4936671  | C    | G          | 2.0852    | 1.2975    | 0.1100 | -0.0039 | 0.0074 | 0.6000  | 0.00526565 | 0.0147904 | 0.72       | 0.00150562  | 0.00357897  | 0.67        |             |             |            |      |
| rs4939051 | 527251 | 11 | 56206141  | G | C | rs11228592 | 0.99 | rs11228592 | G         | A         | 1.6539 | 1.2226  | 0.1800 | 0.0039  | 0.0070     | 0.5700    | 7.5164E-05 | 0.0139682   | 1           | -5.1973E-05 | 0.00381214  | 0.99        |            |      |
| rs4969387 | 678051 | 17 | 99061174  | G | C |            |      |            | 1.5395    | 1.9079    | 0.4200 | 0.0104  | 0.0109 | 0.3400  | -0.0043307 | 0.0217005 | 0.84       | -0.0104737  | 0.00523886  | 0.046       |             |             |            |      |
| rs497417  | 691046 | 8  | 9790041   | T | A |            |      |            | 1.6109    | 1.3585    | 0.2400 | 0.0009  | 0.0078 | 0.9100  | 0.0192947  | 0.0154672 | 0.21       | -0.00253867 | 0.00376074  | 0.52        |             |             |            |      |
| rs4981693 | 689120 | 4  | 29680331  | A | G | rs1569979  | 0.83 | rs1569979  | G         | A         | 2.0513 | 1.2908  | 0.1100 | 0.0162  | 0.0074     | 0.0280    | 0.0124972  | 0.0147441   | 0.4         | 0.000793683 | 0.00357764  | 0.85        |            |      |
| rs498240  | 679278 | 6  | 31829592  | G | A | rs62395851 | 0.74 | rs62395851 | C         | G         | 0.6927 | 6.2148  | 0.9100 | 0.0113  | 0.0356     | 0.7500    | -0.0544764 | 0.0709941   | 0.44        | -0.0119603  | 0.0172827   | 0.49        |            |      |
| rs4985155 | 794269 | 16 | 15129459  | A | G |            |      |            | 1.1588    | 1.1744    | 0.3200 | 0.0081  | 0.0067 | 0.2300  | -0.0142678 | 0.013421  | 0.29       | -0.00296456 | 0.00325838  | 0.36        |             |             |            |      |
| rs4986044 | 787219 | 17 | 21261560  | C | T |            |      |            | 1.7146    | 1.2162    | 0.1600 | -0.0083 | 0.0070 | 0.2300  | -0.0210154 | 0.0138808 | 0.13       | 0.00242153  | 0.00386802  | 0.47        |             |             |            |      |
| rs524281  | 777942 | 11 | 65886662  | C | T |            |      |            | 1.4284    | 1.1976    | 0.2300 | 0.0045  | 0.0068 | 0.5100  | -0.0053894 | 0.0136634 | 0.69       | -0.00384895 | 0.00330762  | 0.24        |             |             |            |      |
| rs5396    | 785408 | 3  | 170744815 | C | T |            |      |            | 0.4615    | 1.3968    | 0.7400 | -0.0016 | 0.0080 | 0.8400  | -0.0073795 | 0.0159603 | 0.64       | 0.00299297  | 0.00383396  | 0.44        |             |             |            |      |
| rs543874  | 795504 | 1  | 17889480  | G | A |            |      |            | 1.5510    | 1.8057    | 0.3900 | -0.0044 | 0.0103 | 0.6700  | 0.0247266  | 0.0206106 | 0.23       | -0.00020679 | 0.00503965  | 0.97        |             |             |            |      |
| rs551137  | 529265 | 11 | 55323307  | C | T |            |      |            | 1.9550    | 1.2557    | 0.1200 | -0.0015 | 0.0072 | 0.8400  | -0.011067  | 0.0143408 | 0.44       | 0.00304979  | 0.00346766  | 0.38        |             |             |            |      |
| rs555267  | 788140 | 18 | 40992698  | T | G |            |      |            |           |           |        |         |        |         |            |           |            |             |             |             |             |             |            |      |
| rs559267  | 794315 | 20 | 54157497  | G | A |            |      |            | 1.5864    | 1.2211    | 0.1900 | -0.0046 | 0.0070 | 0.5100  | 0.00030037 | 0.013932  | 0.98       | -0.00147611 | 0.00338985  | 0.66        |             |             |            |      |
| rs573455  | 795095 | 11 | 117267884 | G | A | rs693147   | 0.76 | rs693147   | C         | A         | 1.5702 | 1.2417  | 0.2100 | 0.0033  | 0.0071     | 0.6400    | -0.0040405 | 0.0142162   | 0.78        | 0.00167307  | 0.00345762  | 0.63        |            |      |
| rs5750913 | 794052 | 22 | 40640285  | G | A |            |      |            |           |           |        |         |        |         |            |           |            |             |             |             |             |             |            |      |
| rs577525  | 690616 | 10 | 97999388  | C | T |            |      |            | 0.9064    | 1.3521    | 0.5000 | -0.0061 | 0.0077 | 0.4300  | 0.0250275  | 0.0154054 | 0.1        | -0.00018562 | 0.00371761  | 0.96        |             |             |            |      |
| rs580438  | 684407 | 3  | 13345450  | T | C |            |      |            | 1.2456    | 1.3052    | 0.3400 | 0.0096  | 0.0075 | 0.2000  | -0.0037065 | 0.0148923 | 0.8        | -0.00181195 | 0.00362509  | 0.62        |             |             |            |      |
| rs587230  | 775267 | 11 | 69299771  | A | G |            |      |            | 1.9386    | 3.0343    | 0.5200 | 0.0059  | 0.0174 | 0.7300  | 0.0388155  | 0.0347375 | 0.26       | 6.91109E-05 | 0.00839424  | 0.99        |             |             |            |      |
| rs6011457 | 690692 | 20 | 61530915  | T | A |            |      |            | 0.2106    | 1.2509    | 0.8700 | -0.0032 | 0.0072 | 0.6500  | 0.0172786  | 0.0142754 | 0.23       | 0.00593932  | 0.00344268  | 0.084       |             |             |            |      |
| rs6019482 | 685234 | 20 | 47495560  | C | T |            |      |            | 1.7022    | 2.1020    | 0.4200 | 0.0135  | 0.0120 | 0.2600  | 0.0128605  | 0.0239283 | 0.59       | 0.00592939  | 0.00584313  | 0.31        |             |             |            |      |
| rs6058635 | 690979 | 20 | 30891925  | G | C |            |      |            |           |           |        |         |        |         |            |           |            |             |             |             |             |             |            |      |
| rs6060151 | 692591 | 20 | 33594226  | T | G |            |      |            | rs6060151 | G         | T      | 0.2157  | 1.2857 | 0.8700  | -0.0002    | 0.0073    | 0.9800     | -0.0034468  | 0.014647    | 0.81        | -0.00366964 | 0.00355375  | 0.3        |      |
| rs6061162 | 691901 | 20 | 29893501  | T | C | rs35026126 | 0.69 | rs35026126 | T         | C         | 0.1212 | 6.0568  | 0.6100 | -0.0064 | 0.0347     | 0.8500    | -0.0447016 | 0.0691794   | 0.52        | -0.0069846  | 0.0165908   | 0.67        |            |      |
| rs607634E | 690971 | 20 | 25401827  | G | A |            |      |            |           |           |        |         |        |         |            |           |            |             |             |             |             |             |            |      |
| rs6088525 | 688940 | 20 | 33170752  | A | C | rs6141482  | 0.99 | rs6141482  | C         | G         | 0.1531 | 1.2412  | 0.9000 | -0.0012 | 0.0071     | 0.8600    | 0.0148311  | 0.0141609   | 0.29        | -0.00299652 | 0.00342995  | 0.38        |            |      |
| rs608894E | 680664 | 20 | 34420023  | A | T |            |      |            |           |           |        |         |        |         |            |           |            |             |             |             |             |             |            |      |
| rs6121381 | 691119 | 20 | 30785593  | T | A |            |      |            | rs6121381 | A         | T      | 1.2555  | 1.5537 | 0.4200  | -0.0052    | 0.0089    | 0.5600     | 0.00240754  | 0.0178347   | 0.89        | -0.00519099 | 0.00431989  | 0.23       |      |
| rs613291E | 665013 | 20 | 26073030  | C | T |            |      |            | 0.3140    | 1.1615    | 0.1700 | 0.0012  | 0.0066 | 0.8500  | -0.014223  | 0.0132527 | 0.28       | -0.00087246 | 0.00319527  | 0.78        |             |             |            |      |
| rs6138482 | 795349 | 20 | 25054442  | T | C | rs12624679 | 0.97 | rs12624679 | C         | T         | 1.6522 | 1.2038  | 0.7900 | 0.0028  | 0.0069     | 0.6900    | 0.00909165 | 0.0170906   | 0.51        | 0.000561391 | 0.00331655  | 0.87        |            |      |
| rs614209E | 690983 | 20 | 32686658  | A | G |            |      |            | 0.4663    | 1.2094    | 0.7000 | 0.0026  | 0.0069 | 0.7100  | -0.0004163 | 0.013827  | 0.98       | -0.00491452 | 0.00339412  | 0.14        |             |             |            |      |
| rs621042  | 689121 | 12 | 18789007  | C | A |            |      |            | 2.5266    | 1.2421    | 0.0420 | -0.0255 | 0.0071 | 0.0003  | 0.0143406  | 0.0141429 | 0.31       | -0.00158895 | 0.00342765  | 0.64        |             |             |            |      |
| rs6235    | 691708 | 5  | 95728898  | G | C |            |      |            | 2.1029    | 1.2680    | 0.6970 | -0.0002 | 0.0072 | 0.9800  | -0.0215872 | 0.0144879 | 0.14       | 0.00783119  | 0.00350793  | 0.026       |             |             |            |      |
| rs6265    | 795458 | 11 | 27679916  | C | T | rs11030104 | 0.88 | rs11030104 | C         | A         | 1.1897 | 1.2028  | 0.3200 | 0.0065  | 0.0069     | 0.3500    | -0.0148234 | 0.0137241   | 0.28        | -0.00174119 | 0.00332151  | 0.6         |            |      |
| rs629443  | 790044 | 13 | 76386075  | T | G | rs9544047  | 0.65 | rs9544047  | A         | C         | 3.5656 | 1.4253  | 0.0120 | -0.0063 | 0.0081     | 0.4400    | -0.0183639 | 0.0162316   | 0.26        | -0.00119922 | 0.00395699  | 0.76        |            |      |
| rs6442021 | 777197 | 3  | 46742019  | C | T |            |      |            |           |           |        |         |        |         |            |           |            |             |             |             |             |             |            |      |
| rs6442101 | 795233 | 3  | 48130893  | C | T |            |      |            | 0.4772    | 1.3470    | 0.7200 | 0.0074  | 0.0077 | 0.3400  | -0.0004776 | 0.0153903 | 0.98       | 0.00306026  | 0.00374458  | 0.46        |             |             |            |      |
| rs644375E | 776827 | 3  | 181329682 | C | T |            |      |            | 1.2433    | 4.6638    | 0.7900 | 0.0040  | 0.0274 | 0.8800  | -0.018171  | 0.054573  | 0.74       | 0.0147894   | 0.0130659   | 0.26        |             |             |            |      |
| rs6448587 | 691097 | 4  | 28561990  | A | C | rs68144005 | 0.79 | rs68144005 | G         | C         | 0.5885 | 1.4814  | 0.6900 | -0.0040 | 0.0085     | 0.6300    | -0.0212328 | 0.0169195   | 0.21        | 0.00813505  | 0.00410251  | 0.047       |            |      |
| rs6449531 | 691940 | 5  | 60712212  | G | A |            |      |            | 0.6959    | 1.4246    | 0.6300 | 0.0147  | 0.0081 | 0.0720  | 0.0007558  | 0.0162928 | 0.96       | 0.00846031  | 0.00393351  | 0.83        |             |             |            |      |
| rs645932E | 611474 | 6  | 58060143  | C | G |            |      |            | 0.1746    | 1.9056    | 0.9300 | -0.0035 | 0.0109 | 0.5700  | 0.0162215  | 0.0216563 | 0.45       | -0.00329958 | 0.00524491  | 0.53        |             |             |            |      |
| rs6461115 | 791735 | 7  | 21036668  | G | A | rs4721359  | 0.78 | rs4721359  | G         | A         | 2.2533 | 1.3463  | 0.0940 | -0.0015 | 0.0077     | 0.8500    | -0.0297149 | 0.0153882   | 0.053       | -0.00073966 | 0.00371789  | 0.84        |            |      |
| rs646348E | 791893 | 7  | 5542513   | T | C |            |      |            | 1.6294    | 2.1790    | 0.4500 | 0.0323  | 0.0125 | 0.0096  | -0.0154297 | 0.0250321 | 0.54       | -0.00443796 | 0.00600565  | 0.66        |             |             |            |      |
| rs647494E | 786471 | 9  | 15670492  | G | T |            |      |            | 0.90      | rs7033236 | G      | A       | 2.1824 | 1.3311  | 0.1000     | 0.0051    | 0.0076     | 0.5100      | 0.0063989   | 0.0151762   | 0.67        | -0.00307542 | 0.00370669 | 0.41 |
| rs6477694 | 789230 | 9  | 111932342 | C | T |            |      |            | 0.5662    | 1.2217    | 0.3000 | 0.0080  | 0.0070 | 0.2500  | -0.0132504 | 0.0139699 | 0.34       | 0.000329805 | 0.0039767   | 0.92        |             |             |            |      |
| rs6490055 | 688822 | 12 | 111768973 | G | A | rs4766502  | 0.65 | rs4766502  | G         | T         | 1.2595 | 1.2709  | 0.3200 | 0.0016  | 0.0073     | 0.8300    | -0.0059162 | 0.014506    | 0.68        | -6.0065E-05 | 0.00354575  | 0.99        |            |      |
| rs6494481 | 692540 | 15 | 64849904  | T | G |            |      |            |           |           |        |         |        |         |            |           |            |             |             |             |             |             |            |      |
| rs6495252 | 685875 | 15 | 78117685  | T | C | rs7176895  | 1.00 | rs7176895  | A         | G         | 0.3542 | 1.1985  | 0.7700 | 0.0004  | 0.0068     | 0.9600    | -0.0215223 | 0.0136462   | 0.11        | -0.00463726 | 0.00331436  | 0.16        |            |      |
| rs651548  | 680904 | 12 | 99560183  | A | G |            |      |            | 0.651548  | 1.548     | 0.6100 | -0.0037 | 0.0071 | 0.1750  | 0.00809327 | 0.0142179 | 0.57       | -0.00417519 | 0.00344558  | 0.23        |             |             |            |      |
| rs6545714 | 793368 | 2  | 59307725  | G | A | rs7424120  | 0.85 | rs7424120  | C         | G         | 0.1500 | 1.2350  | 0.9000 | 0.0139  | 0.0071     | 0.0500    | -0.0313379 | 0.0140942   | 0.026       | -0.00680273 | 0.00341576  | 0.046       |            |      |
| rs6548221 | 795394 | 2  | 295255    | A | G |            |      |            | 0.6548221 | 1.7745    | 1.6374 | 0.2800  | 0.0082 | 0.0093  | 0.3800     | 0.0014952 | 0.0186358  | 0.94        | -0.00227828 | 0.00452212  | 0.61        |             |            |      |
| rs655141C | 668900 | 3  | 89442305  | A | T |            |      |            | 2.1357    | 1.3208    | 0.1100 | 0.0102  | 0.0075 | 0.1800  | -0.0202897 | 0.0150605 | 0.18       | 0.00983265  | 0.00366659  | 0.0073      |             |             |            |      |
| rs656436C | 690911 | 16 | 7679612   | G | A |            |      |            | 0.7439    | 1.2937    | 0.5700 | -0.0003 | 0.0074 | 0.9700  | -0.0173635 | 0.0147993 | 0.24       | 0.000161078 | 0.00357845  | 0.96        |             |             |            |      |
| rs656964E | 795618 | 6  | 130349119 | C | T |            |      |            | 2.4552    | 2.4786    | 0.3200 | 0.0072  | 0.0142 | 0.6100  | 0.00044783 | 0.028231  | 0.99       | -0.00211764 | 0.00691475  | 0.75        |             |             |            |      |
| rs6577584 | 691824 | 1  | 6715390   | G | T | rs6577585  | 1.00 | rs6577585  | A         | G         | 0.0221 | 1.5596  | 0.9900 | 0.0184  | 0.0089     | 0.0390    | 0.0133025  | 0.0178189   | 0.46        | -0.00083094 |             |             |            |      |





|           |        |    |           |   |   |            |   |   |        |        |        |         |        |        |            |           |       |             |            |       |
|-----------|--------|----|-----------|---|---|------------|---|---|--------|--------|--------|---------|--------|--------|------------|-----------|-------|-------------|------------|-------|
| rs7711753 | 794802 | 5  | 122733317 | G | A | rs7711753  | G | A | 1.2010 | 1.2037 | 0.3200 | -0.0055 | 0.0069 | 0.4300 | -0.0087081 | 0.0137058 | 0.53  | 0.0035295   | 0.00331648 | 0.29  |
| rs7715256 | 795302 | 5  | 153537893 | G | T |            |   |   |        |        |        |         |        |        |            |           |       |             |            |       |
| rs7716275 | 781833 | 5  | 137631073 | G | T |            |   |   |        |        |        |         |        |        |            |           |       |             |            |       |
| rs7727781 | 683127 | 5  | 165185571 | T | C | rs7727781  | C | T | 2.7220 | 1.2022 | 0.0240 | -0.0063 | 0.0069 | 0.3600 | -0.005493  | 0.0137468 | 0.69  | -7.7371E-05 | 0.00332915 | 0.98  |
| rs7730004 | 690164 | 5  | 437723426 | T | C | rs7732426  | T | C | 1.5296 | 1.6193 | 0.3400 | -0.0014 | 0.0092 | 0.8800 | -0.0045206 | 0.0184158 | 0.81  | 0.00327464  | 0.00449276 | 0.47  |
| rs7730898 | 792975 | 5  | 170459675 | A | G | rs7730898  | A | G | 0.9160 | 1.8396 | 0.6200 | -0.0075 | 0.0105 | 0.4800 | -0.0345313 | 0.020918  | 0.099 | 0.00209005  | 0.00511415 | 0.68  |
| rs7748777 | 790069 | 6  | 41133806  | A | G | rs7748777  | A | G | 0.8887 | 1.2196 | 0.4700 | -0.0059 | 0.0070 | 0.4000 | 0.00505867 | 0.0139242 | 0.72  | -0.00263795 | 0.00337791 | 0.43  |
| rs775731  | 684541 | 3  | 77624784  | C | T | rs775731   | T | C | 0.2365 | 1.2932 | 0.8500 | 0.0012  | 0.0074 | 0.8700 | -0.0013334 | 0.014724  | 0.93  | 0.00278628  | 0.00359697 | 0.44  |
| rs7760082 | 690649 | 6  | 21919387  | G | A |            |   |   |        |        |        |         |        |        |            |           |       |             |            |       |
| rs7777102 | 778230 | 7  | 73058017  | G | A |            |   |   |        |        |        |         |        |        |            |           |       |             |            |       |
| rs7779498 | 671584 | 7  | 130408415 | C | T | rs35814008 | A | C | 0.2268 | 1.6093 | 0.8900 | -0.0003 | 0.0092 | 0.9700 | -0.0022351 | 0.018135  | 0.9   | 0.00158578  | 0.00445465 | 0.72  |
| rs7784465 | 685477 | 7  | 6418275   | C | T | rs7784465  | C | T | 1.1767 | 4.6377 | 0.8000 | 0.0155  | 0.0266 | 0.5600 | -0.096809  | 0.0534668 | 0.07  | 0.00218544  | 0.01288    | 0.09  |
| rs7796608 | 601887 | 7  | 897874    | A | G | rs7796608  | G | A | 1.4350 | 1.6501 | 0.3800 | -0.0091 | 0.0095 | 0.3400 | 0.0119921  | 0.0188864 | 0.53  | -0.00800338 | 0.00455805 | 0.079 |
| rs7805441 | 682488 | 7  | 78121458  | T | C | rs35114939 | G | C | 0.2132 | 1.1894 | 0.8600 | -0.0070 | 0.0068 | 0.3000 | -0.0059875 | 0.0135541 | 0.66  | 0.000203235 | 0.00329402 | 0.95  |
| rs7827182 | 582727 | 8  | 8380471   | C | G | rs13270194 | C | C | 0.1980 | 1.6336 | 0.9000 | 0.0092  | 0.0093 | 0.3200 | -0.0268879 | 0.018575  | 0.15  | 0.000370306 | 0.00447396 | 0.93  |
| rs7832003 | 682766 | 8  | 10782004  | G | C |            |   |   |        |        |        |         |        |        |            |           |       |             |            |       |
| rs7844647 | 793703 | 8  | 34503776  | T | C | rs7844647  | T | C | 0.2188 | 1.2212 | 0.8600 | -0.0020 | 0.0070 | 0.7800 | -0.0344164 | 0.0139496 | 0.014 | 0.000320121 | 0.0033784  | 0.93  |
| rs785278  | 690853 | 1  | 33307987  | T | A | rs811483   | C | T | 2.6877 | 1.4582 | 0.0650 | -0.0001 | 0.0083 | 0.9900 | -0.012326  | 0.0166427 | 0.46  | -0.00380027 | 0.00405881 | 0.35  |
| rs7856157 | 690934 | 9  | 12631560  | T | C | rs7856157  | T | C | 2.5369 | 6.7246 | 0.7100 | -0.0312 | 0.0387 | 0.4200 | -0.0099943 | 0.0770956 | 0.9   | -0.0188701  | 0.0192391  | 0.33  |
| rs7869771 | 679436 | 9  | 94180627  | A | C | rs7869771  | A | C | 2.1980 | 1.3437 | 0.1000 | -0.0043 | 0.0077 | 0.5700 | 0.0107647  | 0.0153039 | 0.48  | 0.00751024  | 0.00372606 | 0.44  |
| rs7871866 | 683494 | 9  | 131072982 | C | G | rs7871866  | C | G | 0.6397 | 1.5427 | 0.0001 | 0.0042  | 0.0088 | 0.6300 | 0.00983163 | 0.01765   | 0.58  | -0.00378042 | 0.00425516 | 0.37  |
| rs7874154 | 685829 | 9  | 27777012  | C | T | rs10757685 | T | C | 0.2040 | 1.9812 | 0.3000 | 0.0152  | 0.0114 | 0.1800 | -0.0307177 | 0.0227425 | 0.18  | 0.00601113  | 0.0053961  | 0.28  |
| rs7893571 | 687864 | 10 | 16750129  | T | G | rs2356377  | T | G | 1.8164 | 1.7138 | 0.2900 | 0.0036  | 0.0098 | 0.7100 | -0.0166279 | 0.0195066 | 0.39  | -0.00335629 | 0.00472393 | 0.48  |
| rs789910E | 793689 | 10 | 8410904   | G | A | rs789910E  | G | A | 2.2995 | 6.0627 | 0.6200 | 0.0736  | 0.0343 | 0.0320 | 0.00475403 | 0.0684238 | 0.94  | 0.0156147   | 0.0172805  | 0.37  |
| rs790314E | 795624 | 10 | 114758349 | C | T |            |   |   |        |        |        |         |        |        |            |           |       |             |            |       |
| rs7919    | 685991 | 16 | 70514828  | C | A | rs9939726  | G | C | 0.3989 | 1.2254 | 0.7400 | -0.0036 | 0.0070 | 0.6100 | -0.0004722 | 0.013981  | 0.97  | -0.00132575 | 0.00339578 | 0.7   |
| rs7924371 | 689201 | 11 | 49620595  | C | T | rs7924371  | C | T | 1.8308 | 1.1992 | 0.1300 | -0.0050 | 0.0069 | 0.4700 | -0.0002287 | 0.0136932 | 0.99  | 0.0031099   | 0.00331571 | 0.35  |
| rs793520  | 687049 | 10 | 99032375  | A | G | rs793520   | A | G | 2.0239 | 7.0106 | 0.2300 | 0.0183  | 0.0097 | 0.0580 | -0.0040897 | 0.019341  | 0.83  | 0.00495633  | 0.00472553 | 0.29  |
| rs794103C | 795457 | 11 | 122522375 | C | T | rs794103C  | C | T | 0.0076 | 1.3195 | 1.0000 | -0.0028 | 0.0075 | 0.7100 | -0.0014298 | 0.0150593 | 0.92  | 0.00515324  | 0.00366304 | 0.16  |
| rs794812C | 756039 | 11 | 281607227 | T | G | rs1607227  | T | G | 1.1614 | 1.2567 | 0.3600 | -0.0067 | 0.0072 | 0.3500 | -0.0067008 | 0.0143143 | 0.64  | 0.00214192  | 0.00346956 | 0.54  |
| rs795820E | 682999 | 12 | 39329294  | A | G | rs795820E  | A | G | 1.3231 | 1.1728 | 0.2600 | 0.0033  | 0.0067 | 0.6200 | -0.015596  | 0.0133736 | 0.24  | -0.00185296 | 0.0032661  | 0.57  |
| rs796565E | 691448 | 12 | 49987929  | G | A | rs796565E  | G | A | 0.4928 | 1.9239 | 0.8000 | -0.0008 | 0.0110 | 0.9400 | 0.0224076  | 0.0218524 | 0.31  | -0.00300448 | 0.00531728 | 0.57  |
| rs796823C | 690439 | 12 | 133481917 | A | G |            |   |   |        |        |        |         |        |        |            |           |       |             |            |       |
| rs7973955 | 684108 | 12 | 118409640 | G | A | rs7963783  | T | G | 2.7258 | 1.3022 | 0.0360 | 0.0034  | 0.0074 | 0.6500 | 0.00187443 | 0.0148284 | 0.9   | 0.00241028  | 0.00360093 | 0.5   |
| rs7975187 | 691440 | 12 | 60964108  | G | A | rs7975187  | A | G | 0.5128 | 1.3253 | 0.7000 | -0.0082 | 0.0076 | 0.2800 | -9.203E-05 | 0.015171  | 1     | -0.00262341 | 0.00366705 | 0.47  |
| rs799132  | 685905 | 14 | 82684748  | T | A | rs799132   | T | A | 1.9603 | 1.7306 | 0.2600 | -0.0139 | 0.0099 | 0.1600 | -0.0034521 | 0.0196743 | 0.86  | 0.00562049  | 0.00479126 | 0.24  |
| rs799449  | 684521 | 7  | 44784697  | T | C | rs799449   | C | T | 0.5043 | 1.4375 | 0.7300 | -0.0002 | 0.0082 | 0.9800 | 0.00885173 | 0.016448  | 0.59  | -0.00044518 | 0.00400052 | 0.91  |
| rs8016771 | 691604 | 10 | 102649451 | G | C | rs12887554 | C | T | 1.1375 | 2.5894 | 0.6600 | 0.0002  | 0.0148 | 0.9900 | 0.00055075 | 0.0295063 | 0.99  | 0.00873368  | 0.00732521 | 0.23  |
| rs8016855 | 781430 | 14 | 30484722  | C | G |            |   |   |        |        |        |         |        |        |            |           |       |             |            |       |
| rs8024932 | 686606 | 15 | 77915282  | T | G | rs8024932  | G | T | 2.2542 | 1.9146 | 0.2400 | 0.0092  | 0.0110 | 0.4100 | 0.0061576  | 0.0219579 | 0.78  | -0.0051458  | 0.00529919 | 0.33  |
| rs803351C | 686532 | 15 | 61445514  | T | C | rs4238351  | G | A | 1.2765 | 1.2696 | 0.3100 | 0.0110  | 0.0073 | 0.1300 | -0.0024971 | 0.014546  | 0.86  | -0.00215128 | 0.00353244 | 0.54  |
| rs803604C | 691068 | 15 | 36402716  | A | C |            |   |   |        |        |        |         |        |        |            |           |       |             |            |       |
| rs8046061 | 680891 | 16 | 80752293  | T | C | rs8046061  | T | C | 0.1030 | 1.2853 | 0.4300 | -0.0026 | 0.0073 | 0.7200 | -0.0211324 | 0.0146407 | 0.15  | 0.00208879  | 0.00355286 | 0.56  |
| rs8047395 | 788556 | 16 | 53798523  | A | G | rs8047395  | A | G | 2.1133 | 1.2362 | 0.0870 | -0.0019 | 0.0070 | 0.7800 | 0.0116357  | 0.0140673 | 0.41  | 9.9699E-05  | 0.00340161 | 0.98  |
| rs8067737 | 649518 | 17 | 29349688  | T | C | rs8067737  | T | C | 0.4971 | 1.2423 | 0.6900 | 0.0187  | 0.0071 | 0.0085 | -0.0188267 | 0.0141825 | 0.18  | 0.000192601 | 0.00340985 | 0.95  |
| rs806929E | 794875 | 17 | 42935059  | C | T | rs806929E  | C | T | 2.0683 | 1.2291 | 0.0920 | 0.0181  | 0.0070 | 0.0098 | -0.0135893 | 0.0140243 | 0.33  | -0.00189257 | 0.00340024 | 0.58  |
| rs8070454 | 795617 | 17 | 38160754  | C | T | rs8070454  | C | T | 0.3491 | 1.2002 | 0.7700 | 0.0087  | 0.0068 | 0.2000 | -0.0244395 | 0.0136755 | 0.074 | -0.00120368 | 0.00331707 | 0.72  |
| rs8071182 | 771437 | 17 | 55336155  | A | G | rs8071182  | A | G | 2.0139 | 1.2929 | 0.1200 | -0.0102 | 0.0074 | 0.1600 | 0.0156384  | 0.0147254 | 0.29  | -0.00288562 | 0.00360597 | 0.42  |
| rs8075273 | 795026 | 17 | 61728881  | C | A | rs8075273  | C | A | 1.9345 | 2.5556 | 0.4500 | 0.0080  | 0.0145 | 0.5800 | 0.0001994  | 0.0289384 | 0.99  | -0.00342366 | 0.00696508 | 0.62  |
| rs8079034 | 687609 | 17 | 5412361   | C | A | rs8079034  | C | A | 0.3510 | 1.7131 | 0.8400 | 0.0006  | 0.0098 | 0.9500 | 0.0157305  | 0.0195053 | 0.42  | -0.00262460 | 0.00472465 | 0.58  |
| rs8081035 | 677239 | 17 | 75995829  | T | C | rs8081035  | T | C | 1.5047 | 4.6028 | 0.7400 | 0.0228  | 0.0261 | 0.3800 | 0.00681464 | 0.051964  | 0.9   | 0.00547674  | 0.0127653  | 0.67  |
| rs808755C | 681066 | 18 | 58371566  | C | A | rs808755C  | C | A | 0.3864 | 1.2201 | 0.7800 | -0.0161 | 0.0070 | 0.0210 | 0.0249983  | 0.0139139 | 0.072 | 0.000696278 | 0.00338014 | 0.84  |
| rs8089514 | 668999 | 18 | 69224478  | A | T | rs8089514  | A | T | 2.8660 | 1.4954 | 0.0550 | -0.0020 | 0.0085 | 0.8100 | -0.0146721 | 0.0170528 | 0.39  | 0.000452518 | 0.00413727 | 0.91  |
| rs8092502 | 777619 | 18 | 52479487  | G | A | rs8092502  | G | A | 2.4988 | 1.2243 | 0.0410 | -0.0003 | 0.0070 | 0.9700 | -0.021487  | 0.013955  | 0.12  | -0.00116743 | 0.00338684 | 0.73  |
