# Supplementary material for: Investigating causal relationships between obesity and skin barrier function in a multi-ethnic Asian general population cohort
Source: PubMed Central journal article supplement (PMC10511308; doi:10.1038/s41366-023-01343-z), 2023-07-21
Supplement: 41366_2023_1343_MOESM3_ESM.pdf [file 41366_2023_1343_MOESM3_ESM.pdf]

Supplementary Table 2a. List of SNPs for Education (Number of years education completed) and their effects on TEWL

| SNP                 | effect_allele.Edu | other_allele | effect_allele | other_allele | beta.Edu | beta.TEWL    | eaf.Educat | eaf.TEWL | chr.TEWL | pos.TEWL  | se.TEWL  | pval.TEWL | chr.Educat | pos.Educat | se.Educati | pval.Education |
|---------------------|-------------------|--------------|---------------|--------------|----------|--------------|------------|----------|----------|-----------|----------|-----------|------------|------------|------------|----------------|
| chr1:107050579:t:a  | A                 | T            | A             | T            | 0.0086   | 0.0142835    | 0.6615     | 0.698127 | 1        | 107050579 | 0.007455 | 0.055     | 1          | 1.08E+08   | 0.0015     | 5.99E-09       |
| chr1:110177778:a:g  | A                 | G            | A             | G            | 0.0078   | 0.00855781   | 0.4556     | 0.684198 | 1        | 110177778 | 0.007301 | 0.24      | 1          | 1.11E+08   | 0.0014     | 3.29E-08       |
| chr1:113832344:c:g  | C                 | G            | C             | G            | 0.0248   | -0.0372184   | 0.9689     | 0.992555 | 1        | 113832344 | 0.040036 | 0.35      | 1          | 1.14E+08   | 0.0041     | 1.44E-09       |
| chr1:11471002:g:a   | A                 | G            | A             | G            | 0.0099   | -0.00895906  | 0.2128     | 0.124159 | 1        | 11471002  | 0.010423 | 0.39      | 1          | 1.1531059  | 0.0018     | 3.35E-08       |
| chr1:159197500:a:c  | A                 | C            | A             | C            | 0.0138   | 0.0251142    | 0.7606     | 0.954611 | 1        | 159197500 | 0.016411 | 0.13      | 1          | 1.59E+08   | 0.0016     | 5.42E-17       |
| chr1:159430569:c:t  | T                 | C            | T             | C            | 0.0083   | 0.00381074   | 0.3346     | 0.727666 | 1        | 159430569 | 0.007529 | 0.61      | 1          | 1.59E+08   | 0.0015     | 2.14E-08       |
| chr1:174107726:g:c  | C                 | G            | C             | G            | 0.0094   | -0.012694    | 0.4478     | 0.630403 | 1        | 174107726 | 0.007001 | 0.07      | 1          | 1.74E+08   | 0.0014     | 6.42E-11       |
| chr1:181667462:a:g  | A                 | G            | A             | G            | 0.0085   | -0.00934562  | 0.3386     | 0.306676 | 1        | 181667462 | 0.007242 | 0.2       | 1          | 1.82E+08   | 0.0015     | 9.94E-09       |
| chr1:197938424:a:g  | A                 | G            | A             | G            | 0.0111   | 0.0056505    | 0.7635     | 0.733429 | 1        | 197938424 | 0.0077   | 0.46      | 1          | 1.98E+08   | 0.0017     | 2.05E-11       |
| chr1:201876447:c:a  | A                 | C            | A             | C            | -0.0115  | 0.0132765    | 0.3294     | 0.104467 | 1        | 201876447 | 0.011103 | 0.23      | 1          | 2.02E+08   | 0.0015     | 1.13E-14       |
| chr1:20214877:a:g   | A                 | G            | A             | G            | -0.0089  | -0.00843214  | 0.2525     | 0.517771 | 1        | 20214877  | 0.006899 | 0.22      | 1          | 20541370   | 0.0016     | 4.11E-08       |
| chr1:204617919:g:a  | A                 | G            | A             | G            | 0.0199   | 0.00388288   | 0.2131     | 0.298031 | 1        | 204617919 | 0.007683 | 0.61      | 1          | 2.05E+08   | 0.0017     | 4.45E-31       |
| chr1:211236502:c:t  | T                 | C            | T             | C            | -0.009   | -0.00303241  | 0.4325     | 0.413785 | 1        | 211236502 | 0.007007 | 0.67      | 1          | 2.11E+08   | 0.0014     | 3.88E-10       |
| chr1:212978238:t:g  | T                 | G            | T             | G            | -0.0091  | -0.000542258 | 0.2902     | 0.338136 | 1        | 212978238 | 0.007264 | 0.94      | 1          | 2.13E+08   | 0.0015     | 3.52E-09       |
| chr1:216519921:t:c  | T                 | C            | T             | C            | -0.0095  | -0.00551871  | 0.6911     | 0.450528 | 1        | 216519921 | 0.006889 | 0.42      | 1          | 2.17E+08   | 0.0015     | 5.25E-10       |
| chr1:235433937:t:g  | T                 | G            | T             | G            | -0.0098  | 0.00397997   | 0.489      | 0.336695 | 1        | 235433937 | 0.007099 | 0.58      | 1          | 2.36E+08   | 0.0014     | 2.30E-12       |
| chr1:43484139:a:g   | A                 | G            | A             | G            | 0.0149   | 0.0121684    | 0.3223     | 0.055716 | 1        | 43484139  | 0.01498  | 0.42      | 1          | 43949810   | 0.0015     | 4.18E-23       |
| chr1:43999747:t:c   | T                 | C            | T             | C            | -0.0173  | 0.00621345   | 0.1076     | 0.105427 | 1        | 43999747  | 0.011289 | 0.58      | 1          | 44465419   | 0.0023     | 2.19E-14       |
| chr1:4509376:t:a    | A                 | T            | A             | T            | -0.0085  | 0.00690052   | 0.7201     | 0.825408 | 1        | 4509376   | 0.008835 | 0.43      | 1          | 4569436    | 0.0016     | 4.98E-08       |
| chr1:45491937:g:a   | A                 | G            | A             | G            | 0.0104   | -0.00262107  | 0.2228     | 0.329011 | 1        | 45491937  | 0.007284 | 0.72      | 1          | 45957609   | 0.0017     | 7.62E-10       |
| chr1:57822645:t:c   | T                 | C            | T             | C            | 0.0092   | 5.24E-06     | 0.6963     | 0.881604 | 1        | 57822645  | 0.010938 | 1         | 1          | 58288317   | 0.0015     | 1.84E-09       |
| chr1:68865616:t:a   | A                 | T            | A             | T            | 0.0148   | -0.0150963   | 0.1013     | 0.036023 | 1        | 68865616  | 0.018626 | 0.42      | 1          | 69331299   | 0.0023     | 1.78E-10       |
| chr1:70100338:g:t   | T                 | G            | T             | G            | 0.0081   | -0.00966262  | 0.6532     | 0.504563 | 1        | 70100338  | 0.006814 | 0.16      | 1          | 70566021   | 0.0015     | 4.02E-08       |
| chr1:72044059:c:g   | C                 | G            | C             | G            | 0.0084   | -0.0118569   | 0.503      | 0.867675 | 1        | 72044059  | 0.009869 | 0.23      | 1          | 72509742   | 0.0014     | 4.16E-09       |
| chr1:73512804:g:c   | A                 | C            | G             | C            | -0.0153  | -0.0360568   | 0.8881     | 0.009606 | 1        | 73512804  | 0.032921 | 0.27      | 1          | 73978572   | 0.0022     | 6.46E-12       |
| chr1:90631242:c:a   | A                 | C            | A             | C            | -0.0097  | -0.00286798  | 0.6926     | 0.899135 | 1        | 90631242  | 0.011364 | 0.8       | 1          | 91096799   | 0.0015     | 1.53E-10       |
| chr1:93282126:t:g   | T                 | G            | T             | G            | 0.0124   | 0.00516102   | 0.6406     | 0.65658  | 1        | 93282126  | 0.007235 | 0.48      | 1          | 93747683   | 0.0015     | 2.07E-17       |
| chr10:102190030:c:t | T                 | C            | T             | C            | 0.0132   | 0.00637181   | 0.2225     | 0.115754 | 10       | 102190030 | 0.010225 | 0.53      | 10         | 1.04E+08   | 0.0024     | 1.96E-08       |
| chr10:102326552:g:a | A                 | G            | A             | G            | -0.0111  | -0.00536256  | 0.6725     | 0.599183 | 10       | 102326552 | 0.006977 | 0.44      | 10         | 1.05E+08   | 0.002      | 1.58E-08       |
| chr10:104694914:t:c | T                 | C            | T             | C            | -0.0106  | -0.000176357 | 0.5838     | 0.315802 | 10       | 104694914 | 0.007301 | 0.98      | 10         | 1.06E+08   | 0.0014     | 9.94E-14       |
| chr10:104978917:t:c | T                 | C            | T             | C            | -0.0139  | -0.0167303   | 0.7832     | 0.966619 | 10       | 104978917 | 0.018333 | 0.36      | 10         | 1.07E+08   | 0.0022     | 1.94E-10       |
| chr10:105860174:t:c | T                 | C            | T             | C            | -0.0098  | 0.00787331   | 0.7441     | 0.960615 | 10       | 105860174 | 0.017348 | 0.65      | 10         | 1.08E+08   | 0.0016     | 1.87E-09       |
| chr10:109122310:c:t | T                 | C            | T             | C            | -0.009   | -0.0124935   | 0.2561     | 0.276417 | 10       | 109122310 | 0.007669 | 0.1       | 10         | 1.11E+08   | 0.0016     | 2.35E-08       |
| chr10:116790510:c:g | C                 | G            | C             | G            | 0.0078   | 0.00492895   | 0.5663     | 0.560999 | 10       | 116790510 | 0.006802 | 0.47      | 10         | 1.19E+08   | 0.0014     | 4.24E-08       |
| chr10:31997014:t:a  | A                 | T            | A             | T            | 0.0101   | 0.00984846   | 0.7498     | 0.976705 | 10       | 31997014  | 0.022797 | 0.67      | 10         | 32285942   | 0.0016     | 4.80E-10       |
| chr10:3989327:g:a   | A                 | G            | A             | G            | 0.01     | -0.00455335  | 0.3818     | 0.53146  | 10       | 3989327   | 0.006763 | 0.5       | 10         | 4031519    | 0.0014     | 3.97E-12       |
| chr10:61839198:t:c  | T                 | C            | T             | C            | -0.008   | 0.0176481    | 0.5019     | 0.568204 | 10       | 61839198  | 0.006977 | 0.011     | 10         | 63598957   | 0.0014     | 9.88E-09       |
| chr10:63431885:g:t  | T                 | G            | T             | G            | 0.0133   | -0.00137707  | 0.5124     | 0.650576 | 10       | 63431885  | 0.007114 | 0.85      | 10         | 65191645   | 0.0014     | 2.55E-21       |
| chr10:65054170:c:g  | C                 | G            | C             | G            | 0.0113   | 0.0037324    | 0.6512     | 0.650336 | 10       | 65054170  | 0.007265 | 0.61      | 10         | 66813928   | 0.002      | 7.47E-09       |
| chr10:75160441:t:c  | T                 | C            | T             | C            | 0.0085   | 0.000207904  | 0.5884     | 0.137608 | 10       | 75160441  | 0.009425 | 0.98      | 10         | 76920199   | 0.0014     | 2.08E-09       |
| chr11:109418812:c:t | T                 | C            | T             | C            | -0.01    | -0.00280263  | 0.3038     | 0.29683  | 11       | 109418812 | 0.007595 | 0.71      | 11         | 1.09E+08   | 0.0016     | 1.32E-10       |
| chr11:111086611:g:c | C                 | G            | C             | G            | -0.0108  | -0.00817253  | 0.1721     | 0.027858 | 11       | 111086611 | 0.020949 | 0.7       | 11         | 1.11E+08   | 0.0019     | 6.45E-09       |
| chr11:114160077:a:g | A                 | G            | A             | G            | 0.0083   | 0.0054351    | 0.3892     | 0.457973 | 11       | 114160077 | 0.006849 | 0.43      | 11         | 1.14E+08   | 0.0015     | 8.89E-09       |
| chr11:115602656:c:t | T                 | C            | T             | C            | 0.008    | -0.00713764  | 0.4773     | 0.231268 | 11       | 115602656 | 0.007968 | 0.37      | 11         | 1.15E+08   | 0.0014     | 1.11E-08       |
| chr11:12859851:g:c  | C                 | G            | C             | G            | 0.0133   | -0.010039    | 0.6911     | 0.721902 | 11       | 12859851  | 0.007466 | 0.18      | 11         | 12881398   | 0.0015     | 1.79E-18       |
| chr11:131419926:c:a | A                 | C            | A             | C            | 0.0111   | 0.00760747   | 0.6475     | 0.869356 | 11       | 131419926 | 0.01011  | 0.45      | 11         | 1.31E+08   | 0.0015     | 3.91E-14       |
| chr11:132632317:c:t | T                 | C            | T             | C            | 0.0091   | 0.0110764    | 0.7606     | 0.589097 | 11       | 132632317 | 0.006959 | 0.11      | 11         | 1.33E+08   | 0.0016     | 2.81E-08       |
| chr11:132789027:c:t | A                 | G            | A             | G            | 0.0134   | -0.00658215  | 0.9103     | 0.010567 | 11       | 132789027 | 0.033005 | 0.84      | 11         | 1.33E+08   | 0.0025     | 4.40E-08       |
| chr11:20937639:a:t  | A                 | T            | A             | T            | -0.0097  | -0.0019416   | 0.2618     | 0.408982 | 11       | 20937639  | 0.006885 | 0.78      | 11         | 20959185   | 0.0016     | 1.11E-09       |
| chr11:27622178:c:t  | T                 | C            | T             | C            | 0.0106   | -0.00397656  | 0.1845     | 0.447406 | 11       | 27622178  | 0.006821 | 0.56      | 11         | 27643725   | 0.0018     | 4.07E-09       |
| chr11:65567241:c:g  | C                 | G            | C             | G            | -0.0175  | -0.0480671   | 0.9432     | 0.987032 | 11       | 65567241  | 0.02994  | 0.11      | 11         | 65334712   | 0.003      | 7.90E-09       |
| chr11:66325096:c:g  | C                 | G            | C             | G            | 0.0141   | -0.000681877 | 0.7609     | 0.710375 | 11       | 66325096  | 0.007483 | 0.93      | 11         | 66092567   | 0.0017     | 3.10E-17       |
| chr11:79433812:c:g  | C                 | G            | C             | G            | -0.015   | 0.0117596    | 0.8925     | 0.966138 | 11       | 79433812  | 0.018756 | 0.53      | 11         | 79144856   | 0.0023     | 3.12E-11       |

|                     |   |   |   |   |         |              |        |          |    |           |          |        |    |          |        |          |
|---------------------|---|---|---|---|---------|--------------|--------|----------|----|-----------|----------|--------|----|----------|--------|----------|
| chr11:88174544:c:t  | T | C | T | C | -0.0082 | 0.00241327   | 0.4427 | 0.289145 | 11 | 88174544  | 0.007626 | 0.75   | 11 | 87907712 | 0.0014 | 7.10E-09 |
| chr12:13264683:g:c  | C | G | C | G | 0.0142  | 0.00209099   | 0.8887 | 0.911143 | 12 | 13264683  | 0.011872 | 0.86   | 12 | 13417617 | 0.0022 | 1.69E-10 |
| chr12:23544791:c:a  | A | C | A | C | -0.0085 | -0.0158248   | 0.3062 | 0.311479 | 12 | 23544791  | 0.00732  | 0.031  | 12 | 23697725 | 0.0015 | 2.33E-08 |
| chr12:26531410:g:a  | A | G | A | G | -0.0094 | 0.0114212    | 0.262  | 0.034582 | 12 | 26531410  | 0.018705 | 0.54   | 12 | 26684343 | 0.0016 | 6.71E-09 |
| chr12:32316667:a:g  | A | G | A | G | 0.0104  | -0.00589938  | 0.2257 | 0.532661 | 12 | 32316667  | 0.006584 | 0.37   | 12 | 32469601 | 0.0017 | 5.03E-10 |
| chr12:49549339:a:g  | A | G | A | G | -0.011  | 0.000654904  | 0.8193 | 0.898895 | 12 | 49549339  | 0.011334 | 0.95   | 12 | 49943122 | 0.0018 | 2.08E-09 |
| chr12:57896495:g:a  | A | G | A | G | -0.0097 | 0.000326002  | 0.3797 | 0.660423 | 12 | 57896495  | 0.007201 | 0.96   | 12 | 58290278 | 0.0014 | 1.75E-11 |
| chr12:67304076:g:a  | A | G | A | G | 0.0082  | -0.000786932 | 0.645  | 0.383525 | 12 | 67304076  | 0.007073 | 0.91   | 12 | 67697856 | 0.0015 | 2.09E-08 |
| chr12:74509286:c:t  | A | G | A | G | -0.017  | 0.0232279    | 0.0717 | 0.007445 | 12 | 74509286  | 0.038845 | 0.55   | 12 | 74936526 | 0.0027 | 4.10E-10 |
| chr12:78236137:c:t  | T | C | T | C | -0.0114 | -0.00129201  | 0.1341 | 0.45341  | 12 | 78236137  | 0.006825 | 0.85   | 12 | 78629917 | 0.0021 | 3.24E-08 |
| chr13:100101542:c:g | C | G | C | G | 0.0109  | -0.00104139  | 0.7355 | 0.324928 | 13 | 100101542 | 0.007362 | 0.89   | 13 | 1.01E+08 | 0.0016 | 7.77E-12 |
| chr13:55147898:a:c  | A | C | A | C | -0.0108 | -0.00540436  | 0.6449 | 0.513929 | 13 | 55147898  | 0.006867 | 0.43   | 13 | 55722033 | 0.0015 | 1.71E-13 |
| chr13:59847085:a:t  | A | T | A | T | 0.0099  | 0.00392532   | 0.362  | 0.539866 | 13 | 59847085  | 0.006718 | 0.56   | 13 | 60421219 | 0.0015 | 2.22E-11 |
| chr13:66346783:t:a  | A | T | A | T | -0.0089 | -0.000150495 | 0.4893 | 0.646494 | 13 | 66346783  | 0.007151 | 0.98   | 13 | 66920915 | 0.0014 | 1.88E-10 |
| chr13:80896978:g:c  | C | G | C | G | -0.0103 | 0.00259908   | 0.5204 | 0.502642 | 13 | 80896978  | 0.006801 | 0.7    | 13 | 81471113 | 0.0014 | 2.89E-13 |
| chr13:90963584:g:a  | A | G | A | G | -0.0128 | 0.0105093    | 0.2761 | 0.192363 | 13 | 90963584  | 0.00857  | 0.22   | 13 | 91615838 | 0.0016 | 3.42E-16 |
| chr13:91401392:a:g  | A | G | A | G | 0.0182  | 0.0124069    | 0.0912 | 0.98391  | 13 | 91401392  | 0.027475 | 0.65   | 13 | 92044587 | 0.0025 | 1.09E-13 |
| chr13:98447792:c:t  | T | C | T | C | -0.011  | -0.0106034   | 0.5233 | 0.432517 | 13 | 98447792  | 0.00689  | 0.12   | 13 | 99100046 | 0.0014 | 5.96E-15 |
| chr14:103588088:t:c | T | C | T | C | -0.0106 | 0.0010578    | 0.3009 | 0.496158 | 14 | 103588088 | 0.006924 | 0.88   | 14 | 1.04E+08 | 0.0015 | 4.07E-12 |
| chr14:21462773:g:t  | T | G | T | G | -0.0122 | 0.00891413   | 0.8031 | 0.841499 | 14 | 21462773  | 0.009327 | 0.34   | 14 | 21930932 | 0.0018 | 4.78E-12 |
| chr14:26510206:t:c  | T | C | T | C | 0.0145  | 0.00745833   | 0.2455 | 0.416427 | 14 | 26510206  | 0.006857 | 0.28   | 14 | 26979412 | 0.0016 | 4.81E-19 |
| chr14:34619429:t:a  | A | T | A | T | 0.008   | -0.0220089   | 0.5687 | 0.873199 | 14 | 34619429  | 0.010273 | 0.032  | 14 | 35088635 | 0.0014 | 1.58E-08 |
| chr14:56813328:c:t  | T | C | T | C | -0.0144 | 0.0109343    | 0.1511 | 0.037704 | 14 | 56813328  | 0.017585 | 0.53   | 14 | 57280046 | 0.002  | 2.24E-13 |
| chr14:60537171:g:c  | C | G | C | G | -0.0103 | -0.02003     | 0.6019 | 0.230067 | 14 | 60537171  | 0.00803  | 0.013  | 14 | 61003889 | 0.0014 | 8.06E-13 |
| chr14:71968988:c:t  | T | C | T | C | 0.012   | 0.00768843   | 0.1991 | 0.048991 | 14 | 71968988  | 0.015646 | 0.62   | 14 | 72435705 | 0.0018 | 9.42E-12 |
| chr14:84646294:g:t  | T | G | T | G | 0.0127  | -0.000123275 | 0.1412 | 0.01561  | 14 | 84646294  | 0.025618 | 1      | 14 | 85112638 | 0.002  | 4.94E-10 |
| chr14:93821484:t:c  | T | C | T | C | 0.0086  | -0.00101169  | 0.3931 | 0.198847 | 14 | 93821484  | 0.008693 | 0.91   | 14 | 94287830 | 0.0014 | 2.49E-09 |
| chr14:99283827:c:t  | T | C | T | C | 0.0121  | 0.0378272    | 0.4161 | 0.059078 | 14 | 99283827  | 0.014314 | 0.0082 | 14 | 99750164 | 0.0015 | 9.20E-17 |
| chr15:38131529:c:t  | T | C | T | C | 0.0092  | -0.0025132   | 0.2819 | 0.352305 | 15 | 38131529  | 0.007287 | 0.73   | 15 | 38423730 | 0.0016 | 4.21E-09 |
| chr15:51095207:g:t  | T | G | T | G | 0.0113  | -0.0120296   | 0.1549 | 0.017771 | 15 | 51095207  | 0.023156 | 0.6    | 15 | 51387404 | 0.0019 | 4.83E-09 |
| chr15:57261634:a:t  | A | T | A | T | 0.0093  | -0.0119571   | 0.4151 | 0.619837 | 15 | 57261634  | 0.007149 | 0.094  | 15 | 57553832 | 0.0014 | 5.76E-11 |
| chr15:64731033:g:t  | T | G | T | G | 0.0174  | -0.00699322  | 0.0683 | 0.709414 | 15 | 64731033  | 0.006923 | 0.31   | 15 | 65023232 | 0.0028 | 7.76E-10 |
| chr15:83753754:c:g  | C | G | C | G | -0.0096 | 0.0191097    | 0.2277 | 0.040586 | 15 | 83753754  | 0.01715  | 0.27   | 15 | 84422506 | 0.0017 | 1.10E-08 |
| chr16:11991486:a:c  | A | C | A | C | -0.0083 | -0.0108917   | 0.3609 | 0.643372 | 16 | 11991486  | 0.007178 | 0.13   | 16 | 12085343 | 0.0015 | 1.36E-08 |
| chr16:12137882:g:t  | T | G | T | G | -0.0117 | -0.0123288   | 0.6825 | 0.979107 | 16 | 12137882  | 0.023702 | 0.6    | 16 | 12231739 | 0.0015 | 1.41E-14 |
| chr16:14471531:c:t  | A | G | A | G | 0.0105  | 0.022762     | 0.2308 | 0.013209 | 16 | 14471531  | 0.029194 | 0.44   | 16 | 14674204 | 0.0017 | 2.66E-10 |
| chr16:15059860:t:c  | T | C | T | C | -0.013  | -0.00154232  | 0.149  | 0.237512 | 16 | 15059860  | 0.007955 | 0.85   | 16 | 15153717 | 0.002  | 6.22E-11 |
| chr16:19255822:c:g  | C | G | C | G | 0.0093  | -0.00672096  | 0.3828 | 0.021374 | 16 | 19255822  | 0.022931 | 0.77   | 16 | 19267144 | 0.0015 | 1.81E-10 |
| chr16:24700485:c:g  | C | G | C | G | 0.0112  | 0.000109927  | 0.3789 | 0.502161 | 16 | 24700485  | 0.006723 | 0.99   | 16 | 24711806 | 0.0014 | 9.77E-15 |
| chr16:30622979:a:g  | A | G | A | G | 0.0082  | 0.00198059   | 0.5298 | 0.814361 | 16 | 30622979  | 0.007955 | 0.8    | 16 | 30634300 | 0.0014 | 5.11E-09 |
| chr16:3512075:a:g   | A | G | A | G | 0.0101  | -0.000864393 | 0.8017 | 0.731988 | 16 | 3512075   | 0.007722 | 0.91   | 16 | 3562075  | 0.0018 | 9.04E-09 |
| chr16:51154521:g:a  | A | G | A | G | 0.0112  | -0.00646555  | 0.5959 | 0.597262 | 16 | 51154521  | 0.006989 | 0.35   | 16 | 51188432 | 0.0014 | 7.25E-15 |
| chr16:62159736:t:g  | T | G | T | G | -0.0099 | -0.000476191 | 0.5688 | 0.746158 | 16 | 62159736  | 0.007796 | 0.95   | 16 | 62193640 | 0.0014 | 2.31E-12 |
| chr16:65414176:t:g  | T | G | T | G | -0.011  | 0.00983135   | 0.8092 | 0.696926 | 16 | 65414176  | 0.007333 | 0.18   | 16 | 65448079 | 0.0018 | 8.19E-10 |
| chr16:71826105:g:a  | A | G | A | G | 0.0099  | 0.00772641   | 0.7453 | 0.966859 | 16 | 71826105  | 0.019217 | 0.69   | 16 | 71860008 | 0.0016 | 9.28E-10 |
| chr16:7199471:g:a   | A | G | A | G | -0.0091 | -0.00702024  | 0.3236 | 0.075648 | 16 | 7199471   | 0.012946 | 0.59   | 16 | 7249472  | 0.0015 | 1.12E-09 |
| chr16:72176966:g:a  | A | G | A | G | 0.0127  | 0.00298832   | 0.1852 | 0.065322 | 16 | 72176966  | 0.013566 | 0.83   | 16 | 72210865 | 0.0018 | 2.36E-12 |
| chr16:7614873:c:t   | T | C | T | C | -0.0102 | 0.0017485    | 0.361  | 0.177714 | 16 | 7614873   | 0.00882  | 0.84   | 16 | 7664875  | 0.0015 | 3.18E-12 |
| chr16:87410128:c:t  | T | C | T | C | 0.0092  | 0.000951144  | 0.5626 | 0.01489  | 16 | 87410128  | 0.02762  | 0.97   | 16 | 87443734 | 0.0014 | 9.20E-11 |
| chr17:20011233:c:t  | T | C | T | C | -0.0078 | -0.00797918  | 0.5214 | 0.205572 | 17 | 20011233  | 0.008555 | 0.35   | 17 | 19914546 | 0.0014 | 2.59E-08 |
| chr17:39613752:c:t  | T | C | T | C | 0.0102  | -0.000474257 | 0.6947 | 0.424592 | 17 | 39613752  | 0.006802 | 0.94   | 17 | 37770005 | 0.0015 | 1.81E-11 |
| chr17:44981374:t:c  | T | C | T | C | 0.0087  | -0.00101919  | 0.3463 | 0.166186 | 17 | 44981374  | 0.009301 | 0.91   | 17 | 43058742 | 0.0015 | 4.11E-09 |
| chr17:48951110:a:g  | A | G | A | G | 0.0088  | -0.00547289  | 0.4756 | 0.337896 | 17 | 48951110  | 0.007034 | 0.44   | 17 | 47028472 | 0.0014 | 4.10E-10 |
| chr17:52196810:c:t  | T | C | T | C | -0.0087 | 0.00329967   | 0.4176 | 0.320125 | 17 | 52196810  | 0.007577 | 0.66   | 17 | 50274170 | 0.0014 | 7.90E-10 |
| chr18:23494291:g:a  | A | G | A | G | -0.011  | -0.0119677   | 0.4067 | 0.085975 | 18 | 23494291  | 0.012013 | 0.32   | 18 | 21074255 | 0.0014 | 1.47E-14 |

|                    |   |   |   |   |         |              |        |          |    |           |          |        |    |          |        |          |
|--------------------|---|---|---|---|---------|--------------|--------|----------|----|-----------|----------|--------|----|----------|--------|----------|
| chr18:25044744:g:a | A | G | A | G | -0.0124 | -0.00868091  | 0.5714 | 0.701009 | 18 | 25044744  | 0.007387 | 0.24   | 18 | 22624708 | 0.0014 | 2.61E-18 |
| chr18:33612565:a:g | A | G | A | G | -0.008  | 0.0133491    | 0.5847 | 0.916427 | 18 | 33612565  | 0.012287 | 0.28   | 18 | 31192529 | 0.0014 | 1.89E-08 |
| chr18:38546022:g:a | A | G | A | G | 0.0099  | -0.00479754  | 0.7506 | 0.612152 | 18 | 38546022  | 0.006962 | 0.49   | 18 | 36125986 | 0.0016 | 8.80E-10 |
| chr18:38985457:c:t | T | C | T | C | -0.0103 | -0.000684864 | 0.2594 | 0.330692 | 18 | 38985457  | 0.007386 | 0.93   | 18 | 36565421 | 0.0016 | 9.85E-11 |
| chr18:51253303:c:t | T | C | T | C | -0.0087 | -0.0115754   | 0.4856 | 0.362392 | 18 | 51253303  | 0.007125 | 0.1    | 18 | 48779673 | 0.0014 | 4.86E-10 |
| chr18:79818191:c:a | A | C | A | C | -0.013  | 0.00350352   | 0.2761 | 0.409462 | 18 | 79818191  | 0.007009 | 0.62   | 18 | 77578191 | 0.0016 | 9.27E-17 |
| chr19:13101211:c:t | T | C | T | C | -0.0149 | -0.00289193  | 0.1141 | 0.022815 | 19 | 13101211  | 0.022787 | 0.9    | 19 | 13212025 | 0.0023 | 3.81E-11 |
| chr19:32481390:c:t | T | C | T | C | 0.0124  | -0.0102195   | 0.8208 | 0.855908 | 19 | 32481390  | 0.009769 | 0.3    | 19 | 32972296 | 0.0018 | 9.92E-12 |
| chr19:4954443:g:a  | A | G | A | G | -0.0108 | -0.00392281  | 0.1918 | 0.032181 | 19 | 4954443   | 0.018894 | 0.84   | 19 | 4954455  | 0.0018 | 1.29E-09 |
| chr19:54449569:c:t | T | C | T | C | -0.0319 | 0.0100388    | 0.0268 | 0.045629 | 19 | 54449569  | 0.016383 | 0.54   | 19 | 54960747 | 0.0045 | 2.06E-12 |
| chr2:100205083:t:c | T | C | T | C | -0.0215 | 0.00603644   | 0.6017 | 0.45389  | 2  | 100205083 | 0.006747 | 0.37   | 2  | 1.01E+08 | 0.0014 | 1.05E-50 |
| chr2:100712266:g:t | T | G | T | G | 0.0187  | -0.000120088 | 0.0907 | 0.03098  | 2  | 100712266 | 0.019955 | 1      | 2  | 1.01E+08 | 0.0025 | 4.17E-14 |
| chr2:103443545:c:a | A | C | A | C | 0.0185  | -0.00358247  | 0.0876 | 0.005524 | 2  | 103443545 | 0.044526 | 0.94   | 2  | 1.04E+08 | 0.0025 | 3.72E-13 |
| chr2:106947659:t:c | T | C | T | C | -0.0107 | 0.0217769    | 0.3962 | 0.420749 | 2  | 106947659 | 0.006977 | 0.0018 | 2  | 1.08E+08 | 0.0014 | 6.88E-14 |
| chr2:124234310:a:c | A | C | A | C | -0.0117 | -0.00489337  | 0.71   | 0.603987 | 2  | 124234310 | 0.007072 | 0.49   | 2  | 1.25E+08 | 0.0015 | 3.56E-14 |
| chr2:125115631:a:c | A | C | A | C | -0.0091 | -0.0262639   | 0.4718 | 0.160903 | 2  | 125115631 | 0.009229 | 0.0044 | 2  | 1.26E+08 | 0.0014 | 1.03E-10 |
| chr2:125134647:c:t | A | G | A | G | -0.0165 | -0.036875    | 0.0926 | 0.006484 | 2  | 125134647 | 0.041359 | 0.37   | 2  | 1.26E+08 | 0.0024 | 8.36E-12 |
| chr2:138662822:t:c | T | C | T | C | -0.0104 | -0.0148963   | 0.8287 | 0.956772 | 2  | 138662822 | 0.016958 | 0.38   | 2  | 1.39E+08 | 0.0019 | 2.19E-08 |
| chr2:140839360:c:g | A | C | G | C | 0.0182  | -0.0318872   | 0.9333 | 0.014409 | 2  | 140839360 | 0.027192 | 0.24   | 2  | 1.42E+08 | 0.0028 | 8.97E-11 |
| chr2:141311445:g:c | C | G | C | G | 0.0088  | 0.000368301  | 0.3688 | 0.063881 | 2  | 141311445 | 0.01368  | 0.98   | 2  | 1.42E+08 | 0.0015 | 1.68E-09 |
| chr2:142105261:a:g | A | G | A | G | 0.0102  | -0.00812595  | 0.8265 | 0.974784 | 2  | 142105261 | 0.02176  | 0.71   | 2  | 1.43E+08 | 0.0019 | 3.31E-08 |
| chr2:144845739:c:t | T | G | A | G | -0.0193 | 0.0112131    | 0.0739 | 0.012968 | 2  | 144845739 | 0.030516 | 0.71   | 2  | 1.46E+08 | 0.0027 | 5.24E-13 |
| chr2:145038684:g:a | A | G | A | G | 0.0107  | -0.000393596 | 0.4538 | 0.720221 | 2  | 145038684 | 0.00775  | 0.96   | 2  | 1.46E+08 | 0.0014 | 3.43E-14 |
| chr2:160379470:g:c | C | G | C | G | -0.0097 | 0.00642985   | 0.2363 | 0.04611  | 2  | 160379470 | 0.016042 | 0.69   | 2  | 1.61E+08 | 0.0017 | 7.22E-09 |
| chr2:161003249:t:c | T | C | T | C | 0.0155  | -7.78E-05    | 0.2447 | 0.179155 | 2  | 161003249 | 0.009029 | 0.99   | 2  | 1.62E+08 | 0.0022 | 1.17E-12 |
| chr2:180750186:a:g | A | G | A | G | -0.0087 | -0.00289716  | 0.3053 | 0.657061 | 2  | 180750186 | 0.007141 | 0.68   | 2  | 1.82E+08 | 0.0015 | 9.47E-09 |
| chr2:192841785:t:c | T | C | T | C | -0.0082 | -0.000880979 | 0.5121 | 0.54611  | 2  | 192841785 | 0.007004 | 0.9    | 2  | 1.94E+08 | 0.0014 | 7.94E-09 |
| chr2:192988543:c:t | T | C | T | C | -0.0127 | 0.00743351   | 0.5224 | 0.59438  | 2  | 192988543 | 0.006793 | 0.27   | 2  | 1.94E+08 | 0.0014 | 1.37E-19 |
| chr2:21105953:a:g  | A | G | A | G | -0.0091 | -0.00329403  | 0.3051 | 0.147214 | 2  | 21105953  | 0.009608 | 0.73   | 2  | 2.13E+08 | 0.0015 | 2.34E-09 |
| chr2:211734578:t:c | T | C | T | C | 0.0137  | 0.0146194    | 0.6894 | 0.947166 | 2  | 211734578 | 0.014863 | 0.33   | 2  | 2.13E+08 | 0.0015 | 2.55E-19 |
| chr2:211815798:t:c | T | G | T | C | -0.0085 | -0.00248541  | 0.5755 | 0.581652 | 2  | 211815798 | 0.006928 | 0.72   | 2  | 2.13E+08 | 0.0014 | 2.55E-09 |
| chr2:214144634:t:c | T | C | T | C | -0.0094 | 0.00603635   | 0.4915 | 0.769693 | 2  | 214144634 | 0.008113 | 0.46   | 2  | 2.15E+08 | 0.0014 | 2.46E-11 |
| chr2:225425989:c:g | C | G | C | G | 0.0119  | -0.0123176   | 0.1842 | 0.392891 | 2  | 225425989 | 0.00717  | 0.086  | 2  | 2.26E+08 | 0.0018 | 5.34E-11 |
| chr2:228197152:c:t | T | C | T | C | 0.0153  | -0.0272549   | 0.1124 | 0.098223 | 2  | 228197152 | 0.011619 | 0.019  | 2  | 2.29E+08 | 0.0022 | 6.29E-12 |
| chr2:235835982:t:a | A | T | A | T | 0.0104  | -0.00085383  | 0.235  | 0.466619 | 2  | 235835982 | 0.006799 | 0.9    | 2  | 2.37E+08 | 0.0017 | 4.12E-10 |
| chr2:241461182:a:g | A | G | A | G | 0.0085  | 0.00495328   | 0.6337 | 0.866234 | 2  | 241461182 | 0.010206 | 0.63   | 2  | 2.42E+08 | 0.0015 | 6.48E-09 |
| chr2:34154956:c:t  | T | C | T | C | 0.0082  | 0.00234626   | 0.3771 | 0.423631 | 2  | 34154956  | 0.006982 | 0.74   | 2  | 34380023 | 0.0015 | 2.11E-08 |
| chr2:49681013:g:a  | A | G | A | G | -0.008  | 0.00345546   | 0.5117 | 0.512968 | 2  | 49681013  | 0.006873 | 0.62   | 2  | 49908151 | 0.0014 | 1.15E-08 |
| chr2:50767117:g:t  | T | G | T | G | -0.0167 | -0.0132881   | 0.1489 | 0.154419 | 2  | 50767117  | 0.009493 | 0.16   | 2  | 50994255 | 0.002  | 2.12E-17 |
| chr2:57155998:g:t  | T | G | T | G | -0.0089 | 0.0101584    | 0.4079 | 0.292027 | 2  | 57155998  | 0.007454 | 0.17   | 2  | 57383133 | 0.0014 | 3.95E-10 |
| chr2:80194680:c:g  | C | G | C | G | -0.016  | -0.0433854   | 0.9129 | 0.991835 | 2  | 80194680  | 0.038259 | 0.26   | 2  | 80421805 | 0.0025 | 1.72E-10 |
| chr2:80360966:a:c  | A | C | A | C | 0.0209  | -0.0106762   | 0.9524 | 0.862392 | 2  | 80360966  | 0.009965 | 0.28   | 2  | 80588091 | 0.0033 | 2.14E-10 |
| chr2:97712734:c:t  | T | C | T | C | -0.0082 | 0.00470638   | 0.4076 | 0.23511  | 2  | 97712734  | 0.007891 | 0.55   | 2  | 98329197 | 0.0014 | 9.29E-09 |
| chr2:99806696:c:t  | T | C | T | C | 0.0212  | 0.0200646    | 0.0378 | 0.010567 | 2  | 99806696  | 0.032312 | 0.53   | 2  | 1E+08    | 0.0037 | 1.36E-08 |
| chr2:99896691:c:t  | T | C | T | C | 0.0135  | -0.00721673  | 0.1713 | 0.271854 | 2  | 99896691  | 0.007604 | 0.34   | 2  | 1.01E+08 | 0.0019 | 7.68E-13 |
| chr20:14936402:c:g | C | G | C | G | 0.0096  | 0.012034     | 0.7193 | 0.495677 | 20 | 14936402  | 0.006845 | 0.079  | 20 | 14917048 | 0.0016 | 7.09E-10 |
| chr20:15759100:t:c | T | C | T | C | -0.0083 | 0.0127253    | 0.6035 | 0.492795 | 20 | 15759100  | 0.006831 | 0.062  | 20 | 15739745 | 0.0014 | 9.72E-09 |
| chr20:43346755:g:t | T | G | T | G | 0.0171  | -0.0290551   | 0.9248 | 0.990154 | 20 | 43346755  | 0.032673 | 0.37   | 20 | 41975395 | 0.0027 | 1.88E-10 |
| chr20:45936043:g:a | A | G | A | G | -0.008  | 0.00431676   | 0.5129 | 0.529539 | 20 | 45936043  | 0.0069   | 0.53   | 20 | 44564682 | 0.0014 | 1.07E-08 |
| chr20:48916462:a:g | A | G | A | G | -0.0085 | 0.00780313   | 0.3706 | 0.377762 | 20 | 48916462  | 0.007036 | 0.27   | 20 | 47532999 | 0.0015 | 4.38E-09 |
| chr20:59644709:a:g | A | G | A | G | 0.0129  | -0.000204522 | 0.8445 | 0.510567 | 20 | 59644709  | 0.006838 | 0.98   | 20 | 58219764 | 0.0019 | 3.20E-11 |
| chr21:33880392:t:c | T | C | T | C | 0.0112  | 0.00348266   | 0.7915 | 0.840298 | 21 | 33880392  | 0.009352 | 0.71   | 21 | 35252696 | 0.0017 | 8.21E-11 |
| chr21:41281640:t:c | T | C | T | C | 0.0132  | -0.012384    | 0.3597 | 0.137848 | 21 | 41281640  | 0.010044 | 0.22   | 21 | 42653567 | 0.0015 | 1.38E-19 |
| chr21:45067815:t:c | T | C | T | C | -0.0178 | 0.00258569   | 0.9428 | 0.845821 | 21 | 45067815  | 0.009462 | 0.78   | 21 | 46487730 | 0.0031 | 5.92E-09 |
| chr21:45075080:t:c | T | C | T | C | -0.0092 | -0.0225823   | 0.3655 | 0.135447 | 21 | 45075080  | 0.00997  | 0.024  | 21 | 46494995 | 0.0015 | 3.37E-10 |

|                    |   |   |   |   |         |              |        |          |    |           |          |        |    |          |        |          |
|--------------------|---|---|---|---|---------|--------------|--------|----------|----|-----------|----------|--------|----|----------|--------|----------|
| chr22:29484784:a:g | A | G | A | G | -0.0116 | -0.0173458   | 0.7575 | 0.888088 | 22 | 29484784  | 0.010659 | 0.1    | 22 | 29880773 | 0.0016 | 1.27E-12 |
| chr22:29806785:g:c | C | G | C | G | -0.0115 | 0.000923547  | 0.4442 | 0.617435 | 22 | 29806785  | 0.006862 | 0.89   | 22 | 30202774 | 0.0014 | 3.73E-16 |
| chr22:33514750:c:t | T | C | T | C | -0.0082 | -0.000860766 | 0.5542 | 0.486071 | 22 | 33514750  | 0.006969 | 0.9    | 22 | 33910736 | 0.0014 | 5.85E-09 |
| chr22:50666252:g:a | A | G | A | G | 0.0122  | -0.0184473   | 0.4477 | 0.077733 | 22 | 50666252  | 0.012224 | 0.13   | 22 | 51104680 | 0.0014 | 8.31E-18 |
| chr22:50697167:a:t | A | T | A | T | 0.0162  | -0.00680767  | 0.8844 | 0.782661 | 22 | 50697167  | 0.008217 | 0.41   | 22 | 51135595 | 0.0022 | 3.03E-13 |
| chr22:50713203:c:t | T | C | T | C | -0.0134 | 0.01528      | 0.3818 | 0.824688 | 22 | 50713203  | 0.008905 | 0.086  | 22 | 51151631 | 0.0015 | 3.58E-20 |
| chr3:116863339:t:c | T | C | T | C | -0.0111 | -0.0241135   | 0.2863 | 0.21902  | 3  | 116863339 | 0.007914 | 0.0023 | 3  | 1.17E+08 | 0.0016 | 9.38E-13 |
| chr3:118956349:a:g | A | G | A | G | -0.009  | -0.0100739   | 0.7356 | 0.665946 | 3  | 118956349 | 0.007199 | 0.16   | 3  | 1.19E+08 | 0.0016 | 1.70E-08 |
| chr3:122495198:c:t | T | C | T | C | 0.0085  | 0.00401502   | 0.306  | 0.111671 | 3  | 122495198 | 0.010812 | 0.71   | 3  | 1.22E+08 | 0.0015 | 2.57E-08 |
| chr3:123875572:t:g | T | G | T | G | -0.0104 | -0.00751433  | 0.3617 | 0.927714 | 3  | 123875572 | 0.012436 | 0.55   | 3  | 1.24E+08 | 0.0015 | 9.77E-13 |
| chr3:161104181:a:g | A | G | A | G | -0.0097 | -0.00303506  | 0.5223 | 0.211575 | 3  | 161104181 | 0.008248 | 0.71   | 3  | 1.61E+08 | 0.0014 | 4.33E-12 |
| chr3:16940191:g:t  | T | G | T | G | -0.0111 | 0.00751507   | 0.1824 | 0.534582 | 3  | 16940191  | 0.006845 | 0.27   | 3  | 16981683 | 0.0018 | 8.69E-10 |
| chr3:20589806:g:a  | A | G | A | G | 0.0086  | 0.00326792   | 0.4804 | 0.319645 | 3  | 20589806  | 0.007437 | 0.66   | 3  | 20631298 | 0.0014 | 1.02E-09 |
| chr3:24908896:c:g  | C | G | C | G | 0.0103  | -0.00449367  | 0.474  | 0.369116 | 3  | 24908896  | 0.007101 | 0.53   | 3  | 24950387 | 0.0014 | 2.40E-13 |
| chr3:34229550:c:t  | T | C | T | C | -0.009  | -0.00781795  | 0.2542 | 0.235351 | 3  | 34229550  | 0.008243 | 0.34   | 3  | 34271042 | 0.0016 | 2.68E-08 |
| chr3:48484583:a:t  | A | T | A | T | -0.0121 | 0.00547075   | 0.6593 | 0.822286 | 3  | 48484583  | 0.008775 | 0.53   | 3  | 48525955 | 0.0015 | 4.72E-16 |
| chr3:49894327:g:t  | T | G | T | G | -0.0201 | -0.00512648  | 0.1773 | 0.100624 | 3  | 49894327  | 0.011501 | 0.66   | 3  | 49931760 | 0.0018 | 1.35E-27 |
| chr3:50150163:g:c  | C | G | C | G | -0.0222 | 0.000280066  | 0.3468 | 0.020413 | 3  | 50150163  | 0.023953 | 0.99   | 3  | 50187596 | 0.0015 | 2.47E-51 |
| chr3:65668805:a:g  | A | G | A | G | -0.0107 | -0.000933119 | 0.2992 | 0.043948 | 3  | 65668805  | 0.016222 | 0.95   | 3  | 65654480 | 0.0015 | 3.13E-12 |
| chr3:68820772:t:a  | A | T | A | T | -0.009  | -0.00772746  | 0.5836 | 0.915946 | 3  | 68820772  | 0.012067 | 0.52   | 3  | 68869923 | 0.0014 | 2.51E-10 |
| chr3:70491196:a:t  | A | T | A | T | 0.0104  | 0.046345     | 0.7926 | 0.945005 | 3  | 70491196  | 0.014483 | 0.0014 | 3  | 70540347 | 0.0017 | 1.64E-09 |
| chr3:76180910:c:g  | C | G | C | G | -0.0082 | 0.00610148   | 0.5502 | 0.810519 | 3  | 76180910  | 0.008604 | 0.48   | 3  | 76230061 | 0.0014 | 7.10E-09 |
| chr3:78391414:g:a  | A | G | A | G | 0.0083  | -0.00537062  | 0.3354 | 0.219981 | 3  | 78391414  | 0.008314 | 0.52   | 3  | 78440564 | 0.0015 | 4.64E-08 |
| chr3:8216487:g:a   | A | G | A | G | 0.0108  | 0.00780378   | 0.3426 | 0.482229 | 3  | 8216487   | 0.006854 | 0.25   | 3  | 8258174  | 0.0015 | 3.10E-13 |
| chr3:85347968:t:c  | T | C | T | C | -0.0147 | 0.0149869    | 0.1117 | 0.060038 | 3  | 85347968  | 0.014177 | 0.29   | 3  | 85397118 | 0.0022 | 4.70E-11 |
| chr4:105457127:t:c | T | C | T | C | -0.0083 | -0.00345407  | 0.4083 | 0.632805 | 4  | 105457127 | 0.007136 | 0.63   | 4  | 1.06E+08 | 0.0014 | 6.23E-09 |
| chr4:111402093:c:g | C | G | C | G | -0.0078 | 0.024907     | 0.48   | 0.748319 | 4  | 111402093 | 0.007897 | 0.0016 | 4  | 1.12E+08 | 0.0014 | 3.38E-08 |
| chr4:122105714:t:c | T | C | T | C | 0.0103  | -0.00240477  | 0.3034 | 0.31244  | 4  | 122105714 | 0.007256 | 0.74   | 4  | 1.23E+08 | 0.0015 | 1.46E-11 |
| chr4:136608692:t:a | A | T | A | T | -0.0106 | -0.000714844 | 0.3909 | 0.520173 | 4  | 136608692 | 0.006821 | 0.92   | 4  | 1.38E+08 | 0.0014 | 2.75E-13 |
| chr4:15056621:a:g  | A | G | A | G | -0.009  | 0.0100391    | 0.3829 | 0.566763 | 4  | 15056621  | 0.006861 | 0.14   | 4  | 15058245 | 0.0014 | 4.41E-10 |
| chr4:15400491:t:c  | T | C | T | C | -0.008  | 0.00785143   | 0.6365 | 0.473823 | 4  | 15400491  | 0.006878 | 0.25   | 4  | 15402115 | 0.0015 | 3.42E-08 |
| chr4:171505922:g:a | A | G | A | G | -0.0126 | 0.00451521   | 0.7504 | 0.438761 | 4  | 171505922 | 0.006903 | 0.51   | 4  | 1.72E+08 | 0.0016 | 6.24E-15 |
| chr4:175726486:t:c | T | C | T | C | -0.0116 | -0.00499434  | 0.5132 | 0.908021 | 4  | 175726486 | 0.011687 | 0.67   | 4  | 1.77E+08 | 0.0014 | 1.37E-16 |
| chr4:176019184:g:t | T | G | T | G | 0.0103  | 0.00124373   | 0.6254 | 0.450768 | 4  | 176019184 | 0.006906 | 0.86   | 4  | 1.77E+08 | 0.0014 | 1.47E-12 |
| chr4:177619009:a:g | A | G | A | G | 0.0085  | 0.00684622   | 0.6865 | 0.785062 | 4  | 177619009 | 0.008403 | 0.42   | 4  | 1.79E+08 | 0.0015 | 2.03E-08 |
| chr4:21944310:g:t  | T | G | T | G | 0.0121  | 0.0199433    | 0.407  | 0.099424 | 4  | 21944310  | 0.011277 | 0.077  | 4  | 21945933 | 0.0014 | 4.88E-17 |
| chr4:22163632:g:c  | C | G | C | G | -0.0081 | -0.0069358   | 0.3907 | 0.43708  | 4  | 22163632  | 0.006897 | 0.31   | 4  | 22165255 | 0.0014 | 1.82E-08 |
| chr4:25407216:g:a  | A | G | A | G | 0.0104  | 0.0280211    | 0.2242 | 0.018492 | 4  | 25407216  | 0.02571  | 0.28   | 4  | 25408838 | 0.0017 | 2.75E-09 |
| chr4:28607854:t:c  | T | C | T | C | -0.0164 | -0.0101796   | 0.1475 | 0.020173 | 4  | 28607854  | 0.024079 | 0.67   | 4  | 28609476 | 0.0027 | 9.45E-10 |
| chr4:30969200:g:a  | A | G | A | G | 0.0109  | 0.00225256   | 0.6937 | 0.7817   | 4  | 30969200  | 0.008328 | 0.79   | 4  | 30970822 | 0.0015 | 8.69E-13 |
| chr4:35444680:t:c  | T | C | T | C | 0.0078  | 0.00227823   | 0.5048 | 0.633525 | 4  | 35444680  | 0.007063 | 0.75   | 4  | 35446302 | 0.0014 | 2.50E-08 |
| chr4:38590239:a:g  | A | G | A | G | 0.0088  | -0.000856145 | 0.483  | 0.571326 | 4  | 38590239  | 0.006822 | 0.9    | 4  | 38591860 | 0.0014 | 3.02E-10 |
| chr4:61261573:g:c  | C | G | C | G | 0.0084  | -0.00317878  | 0.6293 | 0.690442 | 4  | 61261573  | 0.007341 | 0.66   | 4  | 62127291 | 0.0015 | 6.67E-09 |
| chr4:91024421:c:a  | A | C | A | C | -0.0083 | 0.00427447   | 0.441  | 0.673871 | 4  | 91024421  | 0.007183 | 0.55   | 4  | 91945572 | 0.0014 | 4.35E-09 |
| chr5:104620815:c:g | C | G | C | G | 0.0133  | 0.00508033   | 0.6712 | 0.871518 | 5  | 104620815 | 0.010278 | 0.62   | 5  | 1.04E+08 | 0.0015 | 4.85E-19 |
| chr5:107431645:a:g | A | G | A | G | 0.0095  | -0.00807687  | 0.3695 | 0.6256   | 5  | 107431645 | 0.006914 | 0.24   | 5  | 1.07E+08 | 0.0015 | 6.30E-11 |
| chr5:11471767:c:a  | A | C | A | C | 0.0091  | -0.00315695  | 0.5321 | 0.24952  | 5  | 11471767  | 0.007601 | 0.68   | 5  | 11471879 | 0.0014 | 1.06E-10 |
| chr5:124968984:t:c | T | C | T | C | 0.011   | 0.00206795   | 0.3276 | 0.431796 | 5  | 124968984 | 0.006862 | 0.76   | 5  | 1.24E+08 | 0.0015 | 1.88E-13 |
| chr5:137221366:t:g | T | G | T | G | -0.0137 | 0.00110973   | 0.1479 | 0.178194 | 5  | 137221366 | 0.008963 | 0.9    | 5  | 1.37E+08 | 0.002  | 4.63E-12 |
| chr5:146326106:t:g | T | G | T | G | -0.0091 | 0.00667777   | 0.7621 | 0.787704 | 5  | 146326106 | 0.00835  | 0.42   | 5  | 1.46E+08 | 0.0017 | 3.77E-08 |
| chr5:153999327:g:c | C | G | C | G | -0.03   | 0.0250333    | 0.0186 | 0.008165 | 5  | 153999327 | 0.038305 | 0.51   | 5  | 1.53E+08 | 0.0053 | 1.17E-08 |
| chr5:166981783:g:c | C | G | C | G | -0.0098 | -0.00991339  | 0.7122 | 0.42147  | 5  | 166981783 | 0.006904 | 0.15   | 5  | 1.66E+08 | 0.0016 | 2.74E-10 |
| chr5:169551144:a:t | A | T | A | T | -0.0093 | 0.00462457   | 0.3032 | 0.067723 | 5  | 169551144 | 0.013276 | 0.73   | 5  | 1.69E+08 | 0.0015 | 1.06E-09 |
| chr5:30808538:t:g  | T | G | T | G | 0.0111  | -0.00541115  | 0.4194 | 0.633045 | 5  | 30808538  | 0.007161 | 0.45   | 5  | 30808645 | 0.0014 | 1.31E-14 |
| chr5:58236948:t:c  | T | C | T | C | -0.0099 | -0.00703948  | 0.3149 | 0.261047 | 5  | 58236948  | 0.007647 | 0.36   | 5  | 57532775 | 0.0015 | 4.61E-11 |

|                    |   |   |   |   |         |              |        |          |   |           |          |        |   |          |        |          |
|--------------------|---|---|---|---|---------|--------------|--------|----------|---|-----------|----------|--------|---|----------|--------|----------|
| chr5:58475260:a:g  | A | G | A | G | -0.0116 | -0.0145814   | 0.2929 | 0.220461 | 5 | 58475260  | 0.008402 | 0.083  | 5 | 57771087 | 0.0015 | 4.62E-14 |
| chr5:60274431:a:g  | A | G | A | G | -0.0084 | 0.00857347   | 0.4787 | 0.354947 | 5 | 60274431  | 0.007036 | 0.22   | 5 | 59570258 | 0.0014 | 7.55E-09 |
| chr5:72883747:g:c  | C | G | C | G | 0.0105  | 0.0135       | 0.1696 | 0.106388 | 5 | 72883747  | 0.011112 | 0.22   | 5 | 72179574 | 0.0019 | 3.00E-08 |
| chr5:87788144:t:c  | T | C | T | C | -0.0129 | 0.0190154    | 0.8647 | 0.988953 | 5 | 87788144  | 0.033042 | 0.56   | 5 | 87083961 | 0.0021 | 2.95E-10 |
| chr6:107708314:c:a | A | C | A | C | 0.0089  | 0.0077941    | 0.7272 | 0.521374 | 6 | 107708314 | 0.006858 | 0.26   | 6 | 1.08E+08 | 0.0016 | 1.32E-08 |
| chr6:118894238:a:c | A | C | A | C | 0.0112  | 0.0129712    | 0.6947 | 0.366715 | 6 | 118894238 | 0.006996 | 0.064  | 6 | 1.19E+08 | 0.0015 | 2.44E-13 |
| chr6:130981349:g:c | C | G | C | G | 0.008   | 0.00226951   | 0.3692 | 0.634006 | 6 | 130981349 | 0.007115 | 0.75   | 6 | 1.31E+08 | 0.0015 | 4.33E-08 |
| chr6:144702986:t:c | T | C | T | C | 0.0093  | 0.00400646   | 0.5472 | 0.058838 | 6 | 144702986 | 0.01394  | 0.77   | 6 | 1.45E+08 | 0.0014 | 5.31E-11 |
| chr6:151913458:t:c | T | C | T | C | -0.0155 | -0.007103    | 0.3232 | 0.574928 | 6 | 151913458 | 0.006933 | 0.31   | 6 | 1.52E+08 | 0.0015 | 5.48E-25 |
| chr6:16965821:a:g  | A | G | A | G | -0.0149 | 0.00702104   | 0.761  | 0.833333 | 6 | 16965821  | 0.009488 | 0.46   | 6 | 16966052 | 0.0016 | 1.52E-19 |
| chr6:31587353:a:g  | A | G | A | G | 0.0106  | -0.00140902  | 0.4188 | 0.237752 | 6 | 31587353  | 0.008003 | 0.86   | 6 | 31555130 | 0.0014 | 2.40E-13 |
| chr6:31917046:t:c  | T | C | T | C | 0.0138  | -0.0519279   | 0.1428 | 0.012008 | 6 | 31917046  | 0.03105  | 0.094  | 6 | 31845985 | 0.002  | 5.25E-12 |
| chr6:32107786:t:c  | T | C | T | C | 0.0085  | 0.00129744   | 0.5292 | 0.483429 | 6 | 32107786  | 0.006836 | 0.85   | 6 | 32075563 | 0.0014 | 1.50E-09 |
| chr6:33807171:c:t  | T | C | T | C | 0.009   | 0.0124272    | 0.6627 | 0.817723 | 6 | 33807171  | 0.008887 | 0.16   | 6 | 33774948 | 0.0015 | 1.11E-09 |
| chr6:78801277:a:c  | A | C | A | C | 0.0084  | -0.00505025  | 0.6187 | 0.317963 | 6 | 78801277  | 0.007352 | 0.49   | 6 | 79510994 | 0.0015 | 1.05E-08 |
| chr6:96071781:t:c  | T | C | T | C | -0.0087 | -0.0104034   | 0.3906 | 0.290586 | 6 | 96071781  | 0.007659 | 0.17   | 6 | 96519657 | 0.0014 | 1.20E-09 |
| chr7:102052537:c:g | C | G | C | G | -0.0097 | -0.00640156  | 0.39   | 0.069404 | 7 | 102052537 | 0.012811 | 0.62   | 7 | 1.02E+08 | 0.0014 | 1.72E-11 |
| chr7:104880081:a:t | A | T | A | T | -0.0081 | -0.00589815  | 0.4257 | 0.056436 | 7 | 104880081 | 0.013745 | 0.67   | 7 | 1.05E+08 | 0.0014 | 2.18E-08 |
| chr7:128736846:a:g | A | G | A | G | -0.0081 | 0.00532016   | 0.4185 | 0.360711 | 7 | 128736846 | 0.007038 | 0.45   | 7 | 1.28E+08 | 0.0014 | 1.26E-08 |
| chr7:13988366:t:c  | T | C | T | C | 0.0082  | 0.00578107   | 0.4725 | 0.431316 | 7 | 13988366  | 0.006861 | 0.4    | 7 | 14027991 | 0.0014 | 5.59E-09 |
| chr7:2154761:t:c   | T | C | T | C | 0.0176  | 0.018471     | 0.7812 | 0.930836 | 7 | 2154761   | 0.012998 | 0.16   | 7 | 2194396  | 0.0017 | 2.36E-24 |
| chr7:2283308:t:c   | T | C | T | C | 0.0109  | 0.00651185   | 0.3698 | 0.35975  | 7 | 2283308   | 0.007031 | 0.35   | 7 | 2322943  | 0.0015 | 7.84E-14 |
| chr7:3456400:t:c   | T | C | T | C | -0.0121 | -0.000822311 | 0.5462 | 0.512728 | 7 | 3456400   | 0.006867 | 0.9    | 7 | 3496032  | 0.0014 | 9.25E-18 |
| chr7:49830175:a:g  | A | G | A | G | 0.0141  | 0.00722134   | 0.8378 | 0.888329 | 7 | 49830175  | 0.010821 | 0.5    | 7 | 49869771 | 0.0019 | 1.53E-13 |
| chr7:53790128:t:c  | T | C | T | C | 0.0095  | -0.0108115   | 0.7867 | 0.806916 | 7 | 53790128  | 0.008741 | 0.22   | 7 | 53857821 | 0.0017 | 4.77E-08 |
| chr7:69153783:g:c  | C | G | C | G | 0.0167  | 0.00305027   | 0.0583 | 0.069885 | 7 | 69153783  | 0.013519 | 0.82   | 7 | 68618770 | 0.002  | 2.38E-08 |
| chr7:76216765:c:g  | C | G | C | G | -0.0118 | 0.00625932   | 0.844  | 0.71854  | 7 | 76216765  | 0.00762  | 0.41   | 7 | 75846083 | 0.0019 | 1.08E-09 |
| chr7:99158974:c:t  | T | C | T | C | 0.0098  | 0.000601186  | 0.7342 | 0.855427 | 7 | 99158974  | 0.009465 | 0.95   | 7 | 98756597 | 0.0016 | 6.44E-10 |
| chr8:119070014:g:c | C | G | C | G | 0.0098  | 0.000994766  | 0.6682 | 0.684438 | 8 | 119070014 | 0.007302 | 0.89   | 8 | 1.2E+08  | 0.0015 | 1.14E-10 |
| chr8:119174851:g:c | C | G | C | G | 0.0122  | 0.00193692   | 0.1602 | 0.084294 | 8 | 119174851 | 0.01223  | 0.87   | 8 | 1.2E+08  | 0.0019 | 3.12E-10 |
| chr8:129916920:t:c | T | C | T | C | -0.0104 | 0.00349287   | 0.5258 | 0.502882 | 8 | 129916920 | 0.006897 | 0.61   | 8 | 1.31E+08 | 0.0014 | 1.15E-13 |
| chr8:134428365:g:a | A | G | A | G | -0.0158 | -0.00350065  | 0.1142 | 0.047791 | 8 | 134428365 | 0.015513 | 0.82   | 8 | 1.35E+08 | 0.0022 | 9.06E-13 |
| chr8:141607161:c:g | C | G | C | G | 0.0135  | -0.00432086  | 0.6283 | 0.836695 | 8 | 141607161 | 0.00924  | 0.64   | 8 | 1.43E+08 | 0.0015 | 1.19E-20 |
| chr8:142599411:c:t | T | C | T | C | -0.0133 | -2.70E-05    | 0.1299 | 0.486551 | 8 | 142599411 | 0.006854 | 1      | 8 | 1.44E+08 | 0.0021 | 2.24E-10 |
| chr8:142683195:g:t | T | G | T | G | 0.0081  | 0.00333653   | 0.4317 | 0.176273 | 8 | 142683195 | 0.008892 | 0.71   | 8 | 1.44E+08 | 0.0014 | 1.30E-08 |
| chr8:19514256:t:c  | T | C | T | C | -0.0088 | 0.00742076   | 0.3526 | 0.186359 | 8 | 19514256  | 0.008691 | 0.39   | 8 | 19371767 | 0.0015 | 2.35E-09 |
| chr8:26421657:c:a  | A | C | A | C | 0.0106  | 0.00438551   | 0.1683 | 0.336215 | 8 | 26421657  | 0.007253 | 0.55   | 8 | 26279173 | 0.0019 | 1.97E-08 |
| chr8:42505713:t:c  | T | C | T | C | 0.0132  | 0.0159155    | 0.0987 | 0.034102 | 8 | 42505713  | 0.01897  | 0.4    | 8 | 42363231 | 0.0024 | 4.00E-08 |
| chr8:4938572:g:a   | A | G | A | G | -0.0094 | -0.00890085  | 0.3363 | 0.371998 | 8 | 4938572   | 0.007171 | 0.21   | 8 | 4796094  | 0.0015 | 2.03E-10 |
| chr8:65562495:t:c  | T | C | T | C | -0.0091 | -0.00429097  | 0.4033 | 0.970701 | 8 | 65562495  | 0.018167 | 0.81   | 8 | 66474730 | 0.0014 | 2.00E-10 |
| chr8:70255759:c:t  | T | C | T | C | -0.0124 | 0.00350048   | 0.8739 | 0.602546 | 8 | 70255759  | 0.006847 | 0.61   | 8 | 71167994 | 0.0021 | 4.91E-09 |
| chr8:86288546:t:c  | T | C | T | C | -0.0092 | 0.0211097    | 0.4369 | 0.647935 | 8 | 86288546  | 0.007346 | 0.0041 | 8 | 87300775 | 0.0014 | 8.63E-11 |
| chr8:86757733:a:g  | A | G | A | G | 0.0109  | -0.0122341   | 0.5093 | 0.450288 | 8 | 86757733  | 0.006895 | 0.076  | 8 | 87769961 | 0.0014 | 2.24E-14 |
| chr8:92223447:g:a  | A | G | A | G | 0.0083  | -0.00544521  | 0.327  | 0.487272 | 8 | 92223447  | 0.00689  | 0.43   | 8 | 93235675 | 0.0015 | 2.74E-08 |
| chr8:94577112:a:g  | A | G | A | G | -0.0086 | 0.00425769   | 0.6741 | 0.528578 | 8 | 94577112  | 0.006901 | 0.54   | 8 | 95589340 | 0.0015 | 1.62E-08 |
| chr8:9483422:g:a   | A | G | A | G | 0.0102  | -0.012504    | 0.4055 | 0.723583 | 8 | 9483422   | 0.007595 | 0.1    | 8 | 9340932  | 0.0014 | 1.11E-12 |
| chr9:106915136:t:c | T | C | T | C | 0.0106  | -0.00824653  | 0.7585 | 0.670509 | 9 | 106915136 | 0.007183 | 0.25   | 9 | 1.1E+08  | 0.0016 | 1.47E-10 |
| chr9:116723058:c:a | A | C | A | C | 0.0084  | 0.00779935   | 0.3041 | 0.507205 | 9 | 116723058 | 0.006873 | 0.26   | 9 | 1.19E+08 | 0.0015 | 3.55E-08 |
| chr9:119218308:g:a | A | G | A | G | 0.0115  | -0.00138845  | 0.4604 | 0.663064 | 9 | 119218308 | 0.007289 | 0.85   | 9 | 1.22E+08 | 0.0014 | 2.58E-16 |
| chr9:123566991:g:a | A | G | A | G | -0.0128 | 0.00095129   | 0.2441 | 0.10999  | 9 | 123566991 | 0.010971 | 0.93   | 9 | 1.26E+08 | 0.0017 | 1.11E-14 |
| chr9:125650397:g:a | A | G | A | G | 0.0084  | -0.00968959  | 0.558  | 0.471662 | 9 | 125650397 | 0.006993 | 0.17   | 9 | 1.28E+08 | 0.0014 | 2.52E-09 |
| chr9:131862364:g:a | A | G | A | G | 0.0096  | -0.0144151   | 0.656  | 0.274496 | 9 | 131862364 | 0.007698 | 0.061  | 9 | 1.35E+08 | 0.0015 | 7.42E-11 |
| chr9:132008032:c:a | A | C | A | C | 0.0145  | -0.00887736  | 0.684  | 0.57853  | 9 | 132008032 | 0.0069   | 0.2    | 9 | 1.35E+08 | 0.0015 | 7.63E-22 |
| chr9:132615104:t:c | T | C | T | C | -0.0119 | -0.00297854  | 0.7754 | 0.564601 | 9 | 132615104 | 0.006875 | 0.66   | 9 | 1.35E+08 | 0.0017 | 1.26E-12 |
| chr9:14430694:g:a  | A | G | A | G | 0.0078  | 0.00906087   | 0.4144 | 0.409702 | 9 | 14430694  | 0.00698  | 0.19   | 9 | 14430692 | 0.0014 | 4.00E-08 |

|                   |   |   |   |   |         |             |        |          |    |           |          |       |    |          |        |          |
|-------------------|---|---|---|---|---------|-------------|--------|----------|----|-----------|----------|-------|----|----------|--------|----------|
| chr9:1757274:t:g  | T | G | T | G | -0.0167 | -0.00925332 | 0.6578 | 0.561479 | 9  | 1757274   | 0.006907 | 0.18  | 9  | 1757274  | 0.0015 | 1.25E-29 |
| chr9:23747793:t:c | T | C | T | C | 0.0134  | -0.00803767 | 0.8276 | 0.764169 | 9  | 23747793  | 0.008167 | 0.33  | 9  | 23747791 | 0.0019 | 6.28E-13 |
| chr9:3952892:g:a  | A | G | A | G | -0.0093 | -0.00774155 | 0.3411 | 0.329971 | 9  | 3952892   | 0.007282 | 0.29  | 9  | 3952892  | 0.0015 | 4.12E-10 |
| chr9:79827816:a:t | A | T | A | T | -0.0101 | 0.00155907  | 0.4417 | 0.314121 | 9  | 79827816  | 0.007199 | 0.83  | 9  | 82442731 | 0.0014 | 7.78E-13 |
| chr9:89611257:c:g | C | G | C | G | 0.0097  | 0.00368883  | 0.5324 | 0.739673 | 9  | 89611257  | 0.00792  | 0.64  | 9  | 92226172 | 0.0014 | 5.39E-12 |
| chr9:93604365:a:g | A | G | A | G | -0.0092 | -0.00719488 | 0.244  | 0.256484 | 9  | 93604365  | 0.00774  | 0.35  | 9  | 96366647 | 0.0017 | 2.89E-08 |
| rs10006235        | T | C | T | C | -0.0093 | -0.0214552  | 0.2689 | 0.42171  | 4  | 129748953 | 0.006943 | 0.002 | 4  | 1.31E+08 | 0.0016 | 4.48E-09 |
| rs10041403        | T | C | T | C | 0.0151  | -0.0293558  | 0.8339 | 0.979347 | 5  | 68509445  | 0.022534 | 0.19  | 5  | 67805272 | 0.0019 | 1.55E-15 |
| rs10042828        | A | G | A | G | -0.0145 | 0.0204006   | 0.8885 | 0.986551 | 5  | 89012960  | 0.028473 | 0.47  | 5  | 88308777 | 0.0022 | 1.06E-10 |
| rs10046069        | A | G | A | G | 0.0127  | 0.0215633   | 0.1203 | 0.14073  | 5  | 89819759  | 0.009791 | 0.028 | 5  | 89115576 | 0.0022 | 4.40E-09 |
| rs10057590        | A | C | A | C | 0.0106  | -0.00170624 | 0.4724 | 0.286023 | 5  | 124999554 | 0.007567 | 0.82  | 5  | 1.24E+08 | 0.0014 | 4.08E-14 |
| rs10061420        | A | T | A | T | 0.0082  | 0.000597952 | 0.4741 | 0.665946 | 5  | 105342378 | 0.007201 | 0.93  | 5  | 1.05E+08 | 0.0014 | 6.63E-09 |
| rs1006749         | A | G | A | G | 0.0079  | -0.00143501 | 0.5237 | 0.732229 | 20 | 43088013  | 0.007669 | 0.85  | 20 | 41716653 | 0.0014 | 2.43E-08 |
| rs10074178        | A | G | A | G | 0.0079  | -0.00121923 | 0.5129 | 0.643852 | 5  | 94592000  | 0.007079 | 0.86  | 5  | 93927705 | 0.0014 | 1.58E-08 |
| rs1007731         | A | C | A | C | -0.0143 | -0.0259314  | 0.1159 | 0.012968 | 14 | 36585385  | 0.030511 | 0.4   | 14 | 37054590 | 0.0022 | 1.05E-10 |
| rs10080647        | A | C | A | C | 0.0124  | 0.00342207  | 0.1405 | 0.166667 | 6  | 114421171 | 0.009218 | 0.71  | 6  | 1.15E+08 | 0.002  | 7.05E-10 |
| rs1008078         | T | C | T | C | -0.0182 | 0.00189249  | 0.4019 | 0.388809 | 1  | 90724174  | 0.00712  | 0.79  | 1  | 91189731 | 0.0014 | 4.50E-37 |
| rs1009470         | T | G | T | G | 0.0086  | 0.0158702   | 0.4414 | 0.601105 | 9  | 119526909 | 0.006853 | 0.021 | 9  | 1.22E+08 | 0.0014 | 1.34E-09 |
| rs10098073        | A | C | A | C | -0.0091 | 0.00927303  | 0.4775 | 0.289145 | 8  | 142228143 | 0.00767  | 0.23  | 8  | 1.43E+08 | 0.0014 | 1.03E-10 |
| rs10122669        | A | G | A | G | -0.0079 | 0.0161683   | 0.4143 | 0.303554 | 9  | 113793491 | 0.007403 | 0.029 | 9  | 1.17E+08 | 0.0014 | 3.00E-08 |
| rs10128888        | A | G | A | G | -0.0083 | 0.00165459  | 0.3149 | 0.393132 | 12 | 97405746  | 0.006859 | 0.81  | 12 | 97799524 | 0.0015 | 4.04E-08 |
| rs10166286        | T | C | T | C | 0.0151  | 0.000368067 | 0.173  | 0.539385 | 2  | 100511633 | 0.006733 | 0.96  | 2  | 1.01E+08 | 0.0019 | 3.79E-16 |
| rs10169002        | A | G | A | G | -0.008  | 0.0123973   | 0.5305 | 0.298751 | 2  | 139805799 | 0.007552 | 0.1   | 2  | 1.41E+08 | 0.0014 | 1.15E-08 |
| rs10189857        | A | G | A | G | 0.0158  | 0.00258422  | 0.5654 | 0.231028 | 2  | 60486100  | 0.007993 | 0.75  | 2  | 60713235 | 0.0014 | 4.69E-29 |
| rs10192369        | A | G | A | G | -0.0078 | 0.00956316  | 0.496  | 0.68756  | 2  | 160524377 | 0.007249 | 0.19  | 2  | 1.61E+08 | 0.0014 | 2.36E-08 |
| rs10192834        | T | C | T | C | 0.0083  | -0.00403967 | 0.655  | 0.652978 | 2  | 206860892 | 0.007222 | 0.58  | 2  | 2.08E+08 | 0.0015 | 2.05E-08 |
| rs10193498        | A | T | A | T | 0.0097  | 0.0057421   | 0.755  | 0.425552 | 2  | 173229617 | 0.00669  | 0.39  | 2  | 1.74E+08 | 0.0016 | 3.10E-09 |
| rs10204051        | T | G | T | G | -0.0101 | 0.00019943  | 0.4055 | 0.360711 | 2  | 103158977 | 0.007226 | 0.98  | 2  | 1.04E+08 | 0.0014 | 1.92E-12 |
| rs10205057        | T | C | T | C | 0.009   | -0.00582705 | 0.5619 | 0.527378 | 2  | 185275099 | 0.006858 | 0.4   | 2  | 1.86E+08 | 0.0014 | 3.67E-10 |
| rs10208           | T | C | T | C | 0.0091  | 0.00459272  | 0.3173 | 0.689481 | 17 | 44222910  | 0.007169 | 0.52  | 17 | 42300278 | 0.0015 | 2.07E-09 |
| rs10215082        | A | G | A | G | -0.0149 | -0.0278848  | 0.4661 | 0.074448 | 7  | 93028671  | 0.012547 | 0.026 | 7  | 92657985 | 0.0014 | 7.03E-26 |
| rs1024268         | T | C | T | C | -0.0084 | -0.00267116 | 0.4186 | 0.458453 | 1  | 69651721  | 0.006807 | 0.69  | 1  | 70117404 | 0.0014 | 3.40E-09 |
| rs10251438        | A | C | A | C | 0.0078  | -0.00141462 | 0.4955 | 0.290586 | 7  | 137322222 | 0.007444 | 0.85  | 7  | 1.37E+08 | 0.0014 | 2.65E-08 |
| rs1035578         | A | G | A | G | -0.0094 | -0.0130713  | 0.5272 | 0.647935 | 16 | 12437508  | 0.007163 | 0.068 | 16 | 12531365 | 0.0014 | 2.57E-11 |
| rs10402747        | T | C | T | C | 0.0077  | -0.0111131  | 0.5175 | 0.832373 | 19 | 45311990  | 0.008575 | 0.19  | 19 | 45815248 | 0.0014 | 4.79E-08 |
| rs10411759        | A | G | A | G | 0.0116  | 0.0111928   | 0.1561 | 0.288425 | 19 | 1857298   | 0.007633 | 0.14  | 19 | 1857297  | 0.002  | 2.88E-09 |
| rs10434747        | A | G | A | G | -0.008  | -0.00271312 | 0.4248 | 0.384966 | 5  | 137072341 | 0.007243 | 0.71  | 5  | 1.36E+08 | 0.0014 | 1.48E-08 |
| rs10444280        | T | C | T | C | 0.01    | -0.00185365 | 0.7982 | 0.619356 | 11 | 41134347  | 0.006875 | 0.79  | 11 | 41155897 | 0.0018 | 1.47E-08 |
| rs10450809        | A | G | T | A | -0.0116 | -0.0113058  | 0.8437 | 0.016331 | 13 | 98413817  | 0.025416 | 0.66  | 13 | 99055774 | 0.0019 | 2.18E-09 |
| rs10480450        | A | G | A | G | 0.0158  | -0.0198686  | 0.9341 | 0.878722 | 7  | 108643162 | 0.010733 | 0.064 | 7  | 1.08E+08 | 0.0028 | 2.05E-08 |
| rs10496091        | A | G | A | G | -0.0131 | 0.00197056  | 0.2841 | 0.021854 | 2  | 61255126  | 0.0232   | 0.93  | 2  | 61482261 | 0.0016 | 3.71E-17 |
| rs10499535        | A | G | A | G | 0.008   | -0.0037777  | 0.5013 | 0.764409 | 7  | 21650988  | 0.00816  | 0.64  | 7  | 21690606 | 0.0014 | 1.40E-08 |
| rs10509251        | T | C | T | C | -0.0093 | 0.0124597   | 0.22   | 0.404179 | 10 | 66068678  | 0.006988 | 0.075 | 10 | 67828436 | 0.0017 | 3.61E-08 |
| rs10515007        | T | C | T | C | 0.0143  | 0.0083744   | 0.161  | 0.278338 | 17 | 52318179  | 0.007485 | 0.26  | 17 | 50395539 | 0.0019 | 8.07E-14 |
| rs1051860         | A | G | A | G | -0.0079 | -0.00197345 | 0.4071 | 0.510807 | 14 | 58371950  | 0.006766 | 0.77  | 14 | 58838668 | 0.0014 | 3.29E-08 |
| rs10519504        | T | G | T | G | 0.0119  | 0.0149572   | 0.1561 | 0.160183 | 4  | 139719129 | 0.009168 | 0.1   | 4  | 1.41E+08 | 0.0019 | 7.31E-10 |
| rs1054442         | A | C | A | C | -0.0136 | 0.000476362 | 0.6223 | 0.538425 | 12 | 48995537  | 0.006805 | 0.94  | 12 | 49389320 | 0.0015 | 1.10E-20 |
| rs1058993         | A | G | A | T | -0.0248 | 0.0170664   | 0.965  | 0.018972 | 19 | 13023687  | 0.025407 | 0.5   | 19 | 13109531 | 0.0038 | 8.47E-11 |
| rs1061801         | A | G | A | G | -0.011  | -0.00474662 | 0.187  | 0.123919 | 6  | 33314561  | 0.010469 | 0.65  | 6  | 33282338 | 0.0018 | 1.06E-09 |
| rs1066769         | A | G | A | G | -0.023  | -0.00682754 | 0.0311 | 0.038184 | 2  | 188715421 | 0.017936 | 0.7   | 2  | 1.9E+08  | 0.0041 | 1.38E-08 |
| rs10742591        | A | T | A | T | -0.0084 | -0.0118123  | 0.6097 | 0.364313 | 11 | 41527406  | 0.007043 | 0.093 | 11 | 41548956 | 0.0014 | 4.26E-09 |
| rs10750539        | A | G | A | G | -0.0095 | -0.00547465 | 0.3517 | 0.334534 | 11 | 133678978 | 0.007333 | 0.46  | 11 | 1.34E+08 | 0.0015 | 1.11E-10 |
| rs10752262        | T | C | T | C | 0.0102  | -0.00712261 | 0.4192 | 0.587656 | 10 | 12353101  | 0.006969 | 0.31  | 10 | 12395100 | 0.0014 | 1.28E-12 |
| rs10761202        | T | C | T | C | 0.0088  | -0.0098047  | 0.4946 | 0.413305 | 9  | 93257688  | 0.006883 | 0.15  | 9  | 96019970 | 0.0014 | 4.28E-10 |
| rs10761251        | A | T | A | T | 0.0113  | -0.00787448 | 0.6633 | 0.451969 | 9  | 93659264  | 0.006842 | 0.25  | 9  | 96421546 | 0.0015 | 2.52E-14 |

|             |   |   |   |   |         |              |        |          |    |           |          |       |    |          |        |          |
|-------------|---|---|---|---|---------|--------------|--------|----------|----|-----------|----------|-------|----|----------|--------|----------|
| rs10773002  | A | T | A | T | 0.0185  | -0.0130468   | 0.252  | 0.255524 | 12 | 123262414 | 0.00804  | 0.1   | 12 | 1.24E+08 | 0.0016 | 2.50E-30 |
| rs10773208  | T | C | T | C | -0.011  | 0.0162024    | 0.2526 | 0.15634  | 12 | 122485609 | 0.00933  | 0.082 | 12 | 1.23E+08 | 0.0016 | 8.09E-12 |
| rs10782651  | T | C | T | C | -0.0082 | -0.00664422  | 0.5516 | 0.574207 | 1  | 77468650  | 0.006908 | 0.34  | 1  | 77934335 | 0.0014 | 6.37E-09 |
| rs10783243  | A | G | A | G | -0.0092 | 0.000521248  | 0.5228 | 0.386407 | 12 | 48259220  | 0.007022 | 0.94  | 12 | 48653003 | 0.0014 | 5.80E-11 |
| rs10789285  | T | G | T | G | 0.0091  | 0.00097083   | 0.7542 | 0.674352 | 1  | 69322799  | 0.007448 | 0.9   | 1  | 69788482 | 0.0016 | 2.07E-08 |
| rs10793903  | A | G | A | G | 0.0126  | 0.00214132   | 0.1146 | 0.317003 | 9  | 132101265 | 0.007218 | 0.77  | 9  | 1.35E+08 | 0.0022 | 1.37E-08 |
| rs10795831  | T | G | T | G | -0.0099 | -0.00145984  | 0.212  | 0.621758 | 10 | 10901416  | 0.007021 | 0.84  | 10 | 10943379 | 0.0017 | 6.98E-09 |
| rs10798888  | T | G | T | G | -0.014  | 0.00259946   | 0.1725 | 0.242555 | 1  | 31733498  | 0.007808 | 0.74  | 1  | 32199099 | 0.0019 | 5.15E-14 |
| rs10803585  | A | G | A | G | -0.0084 | 0.00637838   | 0.3555 | 0.577089 | 2  | 127372532 | 0.006711 | 0.34  | 2  | 1.28E+08 | 0.0015 | 1.05E-08 |
| rs10805383  | A | G | A | G | -0.0103 | 0.00459279   | 0.4879 | 0.815562 | 5  | 63738779  | 0.008911 | 0.61  | 5  | 63034606 | 0.0014 | 2.22E-13 |
| rs10810099  | A | G | A | G | -0.0146 | 0.00100316   | 0.2734 | 0.410903 | 9  | 14161928  | 0.007028 | 0.89  | 9  | 14161927 | 0.0016 | 1.91E-20 |
| rs10830858  | T | C | T | C | 0.0092  | -0.00496147  | 0.5104 | 0.747358 | 11 | 92163472  | 0.007757 | 0.52  | 11 | 91896638 | 0.0014 | 5.31E-11 |
| rs10831656  | T | C | T | C | 0.009   | 0.00970944   | 0.3134 | 0.335255 | 11 | 11639268  | 0.007343 | 0.19  | 11 | 11660815 | 0.0015 | 3.10E-09 |
| rs10845051  | A | T | A | T | 0.0083  | 0.012838     | 0.5055 | 0.775216 | 12 | 10138847  | 0.008231 | 0.12  | 12 | 10291446 | 0.0014 | 3.75E-09 |
| rs10862376  | A | G | T | A | 0.0187  | 0.0112818    | 0.0995 | 0.212776 | 12 | 81863854  | 0.00833  | 0.18  | 12 | 82258775 | 0.0023 | 1.67E-15 |
| rs10875121  | C | G | C | G | 0.0174  | 0.00430049   | 0.8361 | 0.931076 | 1  | 97951890  | 0.013531 | 0.75  | 1  | 98417446 | 0.0019 | 4.46E-20 |
| rs10877283  | T | G | T | G | 0.0085  | 0.00367609   | 0.5973 | 0.419789 | 12 | 59443953  | 0.006648 | 0.58  | 12 | 59837734 | 0.0014 | 2.86E-09 |
| rs10879676  | T | C | T | C | -0.0083 | -0.00830261  | 0.5833 | 0.790106 | 12 | 73758622  | 0.008431 | 0.32  | 12 | 74152402 | 0.0014 | 5.29E-09 |
| rs10892807  | T | C | T | C | 0.0109  | -0.00790457  | 0.5671 | 0.56244  | 11 | 122127546 | 0.006848 | 0.25  | 11 | 1.22E+08 | 0.0014 | 1.09E-14 |
| rs10896334  | C | G | T | C | -0.0128 | -0.0105125   | 0.2609 | 0.20317  | 11 | 68514026  | 0.00855  | 0.22  | 11 | 68282986 | 0.0021 | 1.15E-09 |
| rs10899282  | A | G | A | G | 0.014   | 0.00683425   | 0.2279 | 0.18684  | 11 | 76793654  | 0.008921 | 0.44  | 11 | 76504698 | 0.0017 | 1.05E-16 |
| rs10927053  | A | T | A | T | -0.0125 | -0.00403236  | 0.8886 | 0.76489  | 1  | 243648019 | 0.007993 | 0.61  | 1  | 2.44E+08 | 0.0022 | 2.13E-08 |
| rs10928190  | T | C | T | C | -0.0087 | -0.00350388  | 0.452  | 0.741835 | 2  | 143618464 | 0.007761 | 0.65  | 2  | 1.44E+08 | 0.0014 | 7.76E-10 |
| rs10931821  | A | T | A | T | -0.0141 | 0.00406818   | 0.4852 | 0.708694 | 2  | 198631106 | 0.007264 | 0.58  | 2  | 1.99E+08 | 0.0014 | 8.65E-24 |
| rs10937240  | T | C | T | C | -0.0123 | 0.00959173   | 0.1899 | 0.586455 | 3  | 186085034 | 0.006737 | 0.15  | 3  | 1.86E+08 | 0.0018 | 6.95E-12 |
| rs10940540  | A | T | A | T | 0.0078  | 0.00236523   | 0.5522 | 0.669549 | 5  | 57381819  | 0.007186 | 0.74  | 5  | 56677646 | 0.0014 | 3.44E-08 |
| rs10949263  | A | G | A | G | -0.0091 | -0.00738596  | 0.2443 | 0.350144 | 6  | 14886746  | 0.007138 | 0.3   | 6  | 14886977 | 0.0016 | 2.33E-08 |
| rs10951590  | T | C | T | C | -0.0109 | -0.00318019  | 0.3275 | 0.680836 | 7  | 39051443  | 0.00721  | 0.66  | 7  | 39091043 | 0.0015 | 3.62E-13 |
| rs1097784   | T | C | T | C | -0.0083 | -0.000343145 | 0.5021 | 0.15682  | 16 | 10155559  | 0.009059 | 0.97  | 16 | 10249416 | 0.0014 | 3.05E-09 |
| rs10979613  | T | C | T | C | -0.0117 | -0.00638733  | 0.6389 | 0.603506 | 9  | 108925304 | 0.006983 | 0.36  | 9  | 1.12E+08 | 0.0015 | 1.25E-15 |
| rs10985402  | T | G | T | G | 0.0089  | 0.00375965   | 0.2472 | 0.399616 | 9  | 121816503 | 0.006987 | 0.59  | 9  | 1.25E+08 | 0.0016 | 4.47E-08 |
| rs10995639  | T | C | T | C | 0.0078  | -0.0100695   | 0.4199 | 0.576849 | 10 | 63813435  | 0.006967 | 0.15  | 10 | 65573195 | 0.0014 | 4.26E-08 |
| rs11003463  | T | G | T | G | 0.0091  | -0.0186527   | 0.6114 | 0.949087 | 10 | 50042033  | 0.015065 | 0.22  | 10 | 51801793 | 0.0015 | 5.58E-10 |
| rs11021432  | A | T | A | T | 0.0103  | 0.00422299   | 0.3692 | 0.229587 | 11 | 96104510  | 0.00796  | 0.6   | 11 | 95837674 | 0.0015 | 1.25E-12 |
| rs11023764  | A | G | A | G | 0.0091  | 0.00910352   | 0.6418 | 0.247598 | 11 | 15889393  | 0.007853 | 0.25  | 11 | 15910939 | 0.0015 | 5.32E-10 |
| rs11030102  | C | G | C | G | 0.0101  | 0.00360197   | 0.7479 | 0.981989 | 11 | 27660049  | 0.024396 | 0.88  | 11 | 27681596 | 0.0016 | 4.60E-10 |
| rs1106090   | A | G | A | G | 0.0094  | 0.00116858   | 0.6228 | 0.48439  | 2  | 57841606  | 0.006827 | 0.86  | 2  | 58068741 | 0.0014 | 1.00E-10 |
| rs11076962  | T | C | T | C | 0.0086  | -0.00264993  | 0.7189 | 0.449808 | 16 | 5761366   | 0.006827 | 0.7   | 16 | 5811367  | 0.0016 | 4.29E-08 |
| rs1107871   | A | G | A | G | -0.0083 | -0.0123823   | 0.5506 | 0.482229 | 12 | 131756114 | 0.006892 | 0.072 | 12 | 1.32E+08 | 0.0014 | 4.18E-09 |
| rs11081529  | T | C | T | C | 0.0126  | -0.0110182   | 0.7112 | 0.641451 | 18 | 78142735  | 0.007081 | 0.12  | 18 | 75902735 | 0.0015 | 5.22E-16 |
| rs11082011  | T | C | T | C | 0.0194  | 0.00510864   | 0.6716 | 0.65682  | 18 | 37565159  | 0.007402 | 0.49  | 18 | 35145122 | 0.0015 | 2.06E-38 |
| rs11100237  | A | G | A | G | -0.0101 | -0.00439307  | 0.5242 | 0.338377 | 4  | 159555889 | 0.007185 | 0.54  | 4  | 1.6E+08  | 0.0014 | 8.17E-13 |
| rs11121177  | A | G | A | G | 0.0151  | 0.0137323    | 0.1785 | 0.079491 | 1  | 8385886   | 0.012042 | 0.25  | 1  | 8445946  | 0.0018 | 1.44E-16 |
| rs111235962 | T | C | T | C | 0.0133  | -0.0112102   | 0.0962 | 0.052354 | 1  | 20545257  | 0.015447 | 0.47  | 1  | 20871750 | 0.0024 | 2.21E-08 |
| rs11130335  | T | C | T | C | 0.0095  | -0.0153304   | 0.3778 | 0.108069 | 3  | 52989619  | 0.010897 | 0.16  | 3  | 53028375 | 0.0015 | 1.05E-10 |
| rs11130380  | T | G | T | G | 0.009   | 0.00037023   | 0.6135 | 0.877281 | 3  | 53724923  | 0.01033  | 0.97  | 3  | 53758950 | 0.0014 | 4.17E-10 |
| rs11138947  | T | C | T | C | 0.0105  | -0.00275243  | 0.7236 | 0.537944 | 9  | 69495646  | 0.0069   | 0.69  | 9  | 72110562 | 0.0016 | 2.36E-11 |
| rs11154410  | T | C | T | C | -0.0092 | -0.0247829   | 0.3311 | 0.01609  | 6  | 127457700 | 0.024653 | 0.31  | 6  | 1.28E+08 | 0.0015 | 7.71E-10 |
| rs11155813  | T | C | T | C | -0.0129 | 0.000944405  | 0.8937 | 0.716138 | 6  | 151828300 | 0.007683 | 0.9   | 6  | 1.52E+08 | 0.0023 | 1.57E-08 |
| rs11157931  | A | C | A | C | -0.0139 | 0.0116663    | 0.3924 | 0.200048 | 14 | 22933984  | 0.008538 | 0.17  | 14 | 23403193 | 0.0014 | 3.86E-22 |
| rs11158800  | A | G | A | G | -0.0091 | 0.0145052    | 0.5044 | 0.611912 | 14 | 69280329  | 0.006843 | 0.034 | 14 | 69747046 | 0.0014 | 7.15E-11 |
| rs1117152   | T | G | T | G | 0.0106  | -0.0149691   | 0.701  | 0.73391  | 12 | 15285098  | 0.007748 | 0.053 | 12 | 15438032 | 0.0015 | 4.47E-12 |
| rs11174399  | A | G | A | G | 0.0111  | -0.00187438  | 0.2008 | 0.158501 | 12 | 62252775  | 0.009458 | 0.84  | 12 | 62646556 | 0.0018 | 2.42E-10 |
| rs111821073 | T | C | T | C | 0.0124  | -0.0146288   | 0.1567 | 0.019933 | 9  | 96322511  | 0.023925 | 0.54  | 9  | 99084793 | 0.0019 | 1.58E-10 |
| rs11190955  | T | C | T | C | -0.0083 | -0.0037935   | 0.354  | 0.122478 | 10 | 101352408 | 0.010398 | 0.72  | 10 | 1.03E+08 | 0.0015 | 1.74E-08 |

|             |   |   |   |   |         |              |        |          |    |           |          |       |    |          |        |          |
|-------------|---|---|---|---|---------|--------------|--------|----------|----|-----------|----------|-------|----|----------|--------|----------|
| rs1120924   | T | C | T | C | 0.0108  | 0.00662523   | 0.3362 | 0.305956 | 4  | 5227212   | 0.007417 | 0.37  | 4  | 5228939  | 0.0015 | 2.79E-13 |
| rs11209894  | A | G | A | G | 0.0119  | -0.00327147  | 0.1377 | 0.122959 | 1  | 41332996  | 0.010429 | 0.75  | 1  | 41798668 | 0.0021 | 8.03E-09 |
| rs11210228  | T | G | T | G | -0.0105 | -0.00172981  | 0.4356 | 0.245197 | 1  | 73393607  | 0.007815 | 0.82  | 1  | 73859290 | 0.0019 | 2.20E-08 |
| rs11210400  | A | C | A | C | 0.012   | 0.019425     | 0.538  | 0.794669 | 1  | 74024775  | 0.008351 | 0.02  | 1  | 74490459 | 0.0014 | 1.63E-17 |
| rs11213482  | A | G | A | G | -0.0106 | -0.000761358 | 0.836  | 0.959894 | 11 | 110564912 | 0.016999 | 0.96  | 11 | 1.1E+08  | 0.0019 | 2.68E-08 |
| rs1123285   | C | G | C | G | -0.0094 | 0.00413632   | 0.6659 | 0.682517 | 14 | 56807801  | 0.007325 | 0.57  | 14 | 57274519 | 0.0015 | 2.38E-10 |
| rs112375785 | A | G | A | G | 0.0184  | 0.017285     | 0.1435 | 0.012488 | 6  | 97776341  | 0.030482 | 0.57  | 6  | 98224217 | 0.0021 | 6.00E-19 |
| rs112603734 | A | C | A | C | -0.0131 | -0.00869119  | 0.7699 | 0.986792 | 6  | 6069355   | 0.028753 | 0.76  | 6  | 6069588  | 0.0022 | 2.72E-09 |
| rs1128956   | T | G | T | G | -0.014  | -0.00755274  | 0.8251 | 0.755764 | 4  | 182802852 | 0.007994 | 0.34  | 4  | 1.84E+08 | 0.0019 | 5.34E-14 |
| rs113205706 | A | G | A | G | -0.0135 | -0.0278271   | 0.0944 | 0.007685 | 7  | 39207388  | 0.039485 | 0.48  | 7  | 39246987 | 0.0024 | 2.00E-08 |
| rs113520408 | A | G | A | G | 0.0155  | -0.00200781  | 0.2756 | 0.065802 | 7  | 128762728 | 0.013697 | 0.88  | 7  | 1.28E+08 | 0.0016 | 1.03E-22 |
| rs113588399 | T | C | T | C | -0.0104 | 0.00859494   | 0.2079 | 0.077089 | 6  | 156915292 | 0.012618 | 0.5   | 6  | 1.57E+08 | 0.0017 | 1.67E-09 |
| rs114142672 | A | C | A | C | 0.0149  | 0.026678     | 0.9112 | 0.988953 | 3  | 165836740 | 0.033021 | 0.42  | 3  | 1.66E+08 | 0.0025 | 1.39E-09 |
| rs114593137 | A | T | A | T | -0.0122 | 0.00816626   | 0.793  | 0.916427 | 1  | 241713263 | 0.012492 | 0.51  | 1  | 2.42E+08 | 0.0017 | 1.65E-12 |
| rs114810763 | A | G | A | G | -0.0121 | -0.00623835  | 0.1549 | 0.035543 | 6  | 30430613  | 0.018223 | 0.73  | 6  | 30398390 | 0.002  | 1.98E-09 |
| rs11492857  | T | G | T | C | 0.0122  | -0.0402495   | 0.1952 | 0.018012 | 10 | 85277976  | 0.026064 | 0.12  | 10 | 87039251 | 0.0018 | 5.08E-12 |
| rs11591870  | T | C | T | C | 0.0098  | 0.0371781    | 0.798  | 0.989914 | 10 | 63734276  | 0.033721 | 0.27  | 10 | 65494036 | 0.0017 | 2.25E-08 |
| rs11592299  | A | G | A | G | 0.0097  | 0.00430548   | 0.1958 | 0.056196 | 10 | 102466184 | 0.015002 | 0.77  | 10 | 1.04E+08 | 0.0018 | 4.19E-08 |
| rs11598765  | A | G | A | G | -0.0106 | 0.00420863   | 0.1966 | 0.185159 | 10 | 23664796  | 0.008738 | 0.63  | 10 | 23953725 | 0.0018 | 1.73E-09 |
| rs11623285  | T | G | T | G | -0.0135 | -0.0299719   | 0.863  | 0.95365  | 14 | 24088433  | 0.016094 | 0.063 | 14 | 24557642 | 0.0021 | 5.58E-11 |
| rs11640569  | A | G | A | G | 0.0112  | 0.00702982   | 0.142  | 0.019933 | 16 | 48757481  | 0.023928 | 0.77  | 16 | 48791392 | 0.002  | 2.77E-08 |
| rs11644446  | A | G | A | G | 0.0117  | -0.00596853  | 0.1562 | 0.016571 | 16 | 7893550   | 0.027122 | 0.83  | 16 | 7943552  | 0.0019 | 1.61E-09 |
| rs11647188  | A | G | A | G | 0.0079  | 0.000654192  | 0.6066 | 0.285543 | 16 | 82614909  | 0.007491 | 0.93  | 16 | 82648514 | 0.0014 | 4.92E-08 |
| rs11652522  | A | C | A | C | -0.0154 | 0.00179597   | 0.1045 | 0.079731 | 17 | 44978211  | 0.012671 | 0.89  | 17 | 43055579 | 0.0023 | 2.29E-11 |
| rs11657342  | A | G | A | G | 0.014   | 0.00448038   | 0.367  | 0.036023 | 17 | 81381494  | 0.01701  | 0.79  | 17 | 79355294 | 0.0019 | 2.32E-13 |
| rs11657979  | A | G | A | G | -0.0091 | -0.00515032  | 0.2449 | 0.162344 | 17 | 34573818  | 0.009232 | 0.58  | 17 | 32900837 | 0.0017 | 4.57E-08 |
| rs11662423  | A | G | C | A | 0.0088  | 0.00162155   | 0.3998 | 0.434198 | 18 | 76469034  | 0.006784 | 0.81  | 18 | 74141190 | 0.0014 | 8.95E-10 |
| rs11663678  | T | C | T | C | -0.0121 | 0.0103332    | 0.8842 | 0.924352 | 18 | 45328761  | 0.012582 | 0.41  | 18 | 42908726 | 0.0022 | 3.42E-08 |
| rs1167827   | A | G | A | G | 0.0104  | -0.00290299  | 0.4347 | 0.875841 | 7  | 75533848  | 0.009986 | 0.77  | 7  | 75163169 | 0.0014 | 2.93E-13 |
| rs11678980  | A | G | A | G | -0.0166 | 0.00914988   | 0.4527 | 0.376801 | 2  | 161244750 | 0.007165 | 0.2   | 2  | 1.62E+08 | 0.0014 | 1.60E-31 |
| rs11687736  | A | T | A | T | -0.0105 | -0.00620536  | 0.6764 | 0.692123 | 2  | 224540405 | 0.007456 | 0.41  | 2  | 2.25E+08 | 0.0015 | 4.66E-12 |
| rs11693885  | A | G | A | G | -0.0091 | -0.0121096   | 0.4522 | 0.304515 | 2  | 59894911  | 0.00747  | 0.11  | 2  | 60122046 | 0.0014 | 1.22E-10 |
| rs117005905 | T | C | T | C | 0.015   | 0.000869463  | 0.1143 | 0.148415 | 6  | 113897444 | 0.00946  | 0.93  | 6  | 1.14E+08 | 0.0022 | 9.35E-12 |
| rs11703948  | A | G | A | G | -0.0168 | 0.000950066  | 0.9026 | 0.851825 | 22 | 38421042  | 0.009669 | 0.92  | 22 | 38817047 | 0.0024 | 1.26E-12 |
| rs1171040   | A | G | A | G | -0.0113 | -0.0023906   | 0.7866 | 0.673151 | 1  | 190431854 | 0.007297 | 0.74  | 1  | 1.9E+08  | 0.0017 | 5.07E-11 |
| rs11716398  | A | G | A | G | 0.0159  | 0.0150972    | 0.8663 | 0.62488  | 3  | 50662284  | 0.006888 | 0.028 | 3  | 50699715 | 0.0021 | 1.89E-14 |
| rs11720093  | T | C | T | C | 0.015   | 0.0123379    | 0.0809 | 0.250961 | 3  | 50524611  | 0.007874 | 0.12  | 3  | 50562042 | 0.0026 | 6.48E-09 |
| rs11724690  | T | G | T | G | 0.0093  | -0.0194123   | 0.2887 | 0.080692 | 4  | 185843593 | 0.012466 | 0.12  | 4  | 1.87E+08 | 0.0015 | 2.08E-09 |
| rs11732160  | A | G | A | G | 0.0105  | -0.00415427  | 0.7154 | 0.819164 | 4  | 66205106  | 0.008907 | 0.64  | 4  | 67070824 | 0.0016 | 1.46E-11 |
| rs11733439  | A | G | A | G | -0.0096 | 0.000637248  | 0.7883 | 0.607349 | 4  | 30533070  | 0.007284 | 0.93  | 4  | 30534692 | 0.0017 | 2.10E-08 |
| rs11736863  | A | G | A | G | 0.0142  | 0.00155166   | 0.1895 | 0.043708 | 4  | 23727943  | 0.016522 | 0.93  | 4  | 23729566 | 0.0018 | 2.56E-15 |
| rs117398064 | C | G | C | G | -0.0141 | 0.0220937    | 0.0912 | 0.007205 | 12 | 26370695  | 0.039414 | 0.58  | 12 | 26523628 | 0.0025 | 1.16E-08 |
| rs117623407 | A | G | A | G | -0.0118 | 0.0328136    | 0.8536 | 0.974544 | 19 | 31713583  | 0.021653 | 0.13  | 19 | 32204489 | 0.002  | 4.30E-09 |
| rs11765387  | T | C | T | C | 0.0086  | 0.000490128  | 0.6734 | 0.418348 | 7  | 32455178  | 0.006981 | 0.94  | 7  | 32494790 | 0.0015 | 9.40E-09 |
| rs11772232  | T | C | T | C | 0.0177  | -0.00394546  | 0.1691 | 0.115274 | 7  | 1816637   | 0.010733 | 0.71  | 7  | 1856273  | 0.0019 | 1.20E-20 |
| rs11774212  | T | C | T | C | 0.0128  | -0.00571543  | 0.5163 | 0.270173 | 8  | 144461122 | 0.007685 | 0.46  | 8  | 1.46E+08 | 0.0014 | 1.40E-19 |
| rs117799466 | C | G | C | G | 0.0106  | 0.00636548   | 0.3619 | 0.282901 | 15 | 34367316  | 0.007601 | 0.4   | 15 | 34659517 | 0.0016 | 1.19E-11 |
| rs11780023  | T | C | T | C | 0.0085  | 0.00156312   | 0.5051 | 0.585014 | 8  | 140982679 | 0.006965 | 0.82  | 8  | 1.42E+08 | 0.0014 | 1.17E-09 |
| rs118093058 | T | G | T | G | 0.0146  | -0.00166048  | 0.133  | 0.222382 | 11 | 62646201  | 0.008165 | 0.84  | 11 | 62413673 | 0.0021 | 3.78E-12 |
| rs11820113  | T | C | T | C | -0.0104 | -0.00986516  | 0.2459 | 0.271134 | 11 | 107296760 | 0.007788 | 0.21  | 11 | 1.07E+08 | 0.0016 | 1.61E-10 |
| rs11845781  | T | C | T | C | -0.0079 | 0.0158635    | 0.5552 | 0.601105 | 14 | 88810087  | 0.00704  | 0.024 | 14 | 89276431 | 0.0014 | 2.43E-08 |
| rs11871429  | A | G | A | G | 0.0128  | -0.00223253  | 0.7727 | 0.666186 | 17 | 44843561  | 0.00724  | 0.76  | 17 | 42920929 | 0.0017 | 2.52E-14 |
| rs11917701  | A | G | A | G | -0.0087 | -0.00244314  | 0.4041 | 0.600624 | 3  | 117455721 | 0.006891 | 0.72  | 3  | 1.17E+08 | 0.0014 | 9.45E-10 |
| rs11919835  | C | G | C | G | 0.0089  | 0.00569764   | 0.3857 | 0.367915 | 3  | 70905122  | 0.007066 | 0.42  | 3  | 70954273 | 0.0015 | 7.95E-10 |
| rs12005151  | A | G | A | G | 0.0087  | 0.0171903    | 0.3615 | 0.139769 | 9  | 132155262 | 0.010081 | 0.088 | 9  | 1.35E+08 | 0.0015 | 3.73E-09 |



|            |   |   |   |   |         |              |        |          |    |           |          |        |    |          |        |          |
|------------|---|---|---|---|---------|--------------|--------|----------|----|-----------|----------|--------|----|----------|--------|----------|
| rs12028010 | T | C | T | C | 0.0164  | -0.0128219   | 0.7711 | 0.660183 | 1  | 41298799  | 0.007079 | 0.07   | 1  | 41764471 | 0.0017 | 9.78E-23 |
| rs12028229 | T | G | T | G | 0.0099  | 0.00344979   | 0.2631 | 0.431076 | 1  | 72520453  | 0.006797 | 0.61   | 1  | 72986136 | 0.0016 | 1.67E-09 |
| rs12054166 | C | G | C | G | 0.0096  | -0.00688524  | 0.7399 | 0.935159 | 3  | 150375658 | 0.013812 | 0.62   | 3  | 1.5E+08  | 0.0016 | 2.30E-09 |
| rs12076635 | C | G | C | G | 0.0207  | -0.00508589  | 0.7811 | 0.771614 | 1  | 43560985  | 0.007923 | 0.52   | 1  | 44026656 | 0.0017 | 3.33E-34 |
| rs12113634 | T | C | T | C | 0.0088  | -0.00164023  | 0.6504 | 0.669549 | 7  | 112356897 | 0.007361 | 0.82   | 7  | 1.12E+08 | 0.0015 | 2.50E-09 |
| rs12123293 | T | C | T | C | 0.0086  | 0.011715     | 0.6476 | 0.800913 | 1  | 210739493 | 0.008633 | 0.17   | 1  | 2.11E+08 | 0.0015 | 4.48E-09 |
| rs12126231 | A | G | A | G | 0.0095  | 0.0043271    | 0.6094 | 0.451729 | 1  | 184729682 | 0.006988 | 0.54   | 1  | 1.85E+08 | 0.0014 | 4.82E-11 |
| rs12127928 | T | C | T | C | 0.0108  | 0.0157604    | 0.8057 | 0.912104 | 1  | 28382018  | 0.012193 | 0.2    | 1  | 28708529 | 0.0018 | 1.69E-09 |
| rs12145078 | A | T | A | T | -0.0127 | -0.00162139  | 0.2074 | 0.115514 | 1  | 197853847 | 0.01048  | 0.88   | 1  | 1.98E+08 | 0.0017 | 2.56E-13 |
| rs12170452 | A | G | A | G | 0.0105  | 9.97E-05     | 0.4507 | 0.053314 | 22 | 39623768  | 0.014005 | 0.99   | 22 | 40019773 | 0.0014 | 7.78E-14 |
| rs1220779  | A | G | A | G | -0.0079 | -0.0108369   | 0.4679 | 0.158261 | 7  | 54666980  | 0.009128 | 0.24   | 7  | 54734673 | 0.0014 | 1.58E-08 |
| rs12234369 | A | G | A | G | 0.0087  | -0.0035903   | 0.3142 | 0.126561 | 7  | 11853649  | 0.010018 | 0.72   | 7  | 11893275 | 0.0015 | 9.61E-09 |
| rs12238011 | T | C | T | C | -0.0141 | 0.00899519   | 0.0809 | 0.137368 | 9  | 14210898  | 0.009932 | 0.37   | 9  | 14210897 | 0.0026 | 4.67E-08 |
| rs12273435 | A | G | A | G | -0.0132 | -0.00096701  | 0.207  | 0.064601 | 11 | 133955960 | 0.013463 | 0.94   | 11 | 1.34E+08 | 0.0017 | 4.72E-14 |
| rs12285074 | A | G | A | G | 0.0161  | 0.00655487   | 0.1012 | 0.51513  | 11 | 116891312 | 0.006962 | 0.35   | 11 | 1.17E+08 | 0.0023 | 5.11E-12 |
| rs12304188 | A | G | A | G | 0.0111  | 0.00565052   | 0.842  | 0.653698 | 12 | 97587494  | 0.007292 | 0.44   | 12 | 97981272 | 0.0019 | 8.17E-09 |
| rs12332731 | A | T | A | T | 0.0135  | 0.00608461   | 0.1882 | 0.054755 | 5  | 93697376  | 0.014827 | 0.68   | 5  | 93033082 | 0.0018 | 5.96E-14 |
| rs12359372 | T | C | T | C | -0.0092 | 0.0256608    | 0.6624 | 0.837656 | 10 | 66008193  | 0.009145 | 0.005  | 10 | 67767951 | 0.0015 | 6.33E-10 |
| rs12375949 | T | C | T | C | -0.0138 | -0.000591436 | 0.4312 | 0.283862 | 9  | 121855621 | 0.007619 | 0.94   | 9  | 1.25E+08 | 0.0014 | 1.61E-22 |
| rs12431682 | T | C | T | C | -0.0093 | 0.00492871   | 0.3699 | 0.438761 | 14 | 101073662 | 0.006994 | 0.48   | 14 | 1.02E+08 | 0.0015 | 1.73E-10 |
| rs12438177 | A | G | A | G | 0.0093  | 0.000228952  | 0.3676 | 0.570845 | 15 | 55659234  | 0.006694 | 0.97   | 15 | 55951432 | 0.0015 | 1.48E-10 |
| rs1245829  | A | T | A | T | -0.0099 | 0.00087089   | 0.5814 | 0.867915 | 12 | 79254390  | 0.010075 | 0.93   | 12 | 79648170 | 0.0014 | 3.29E-12 |
| rs12467175 | T | C | T | C | -0.0081 | 0.00333619   | 0.4923 | 0.31244  | 2  | 228325144 | 0.007329 | 0.65   | 2  | 2.29E+08 | 0.0014 | 6.90E-09 |
| rs12468040 | T | G | T | G | 0.0137  | -0.00349836  | 0.3819 | 0.694524 | 2  | 44627842  | 0.007334 | 0.63   | 2  | 44854981 | 0.0014 | 3.12E-21 |
| rs12473986 | T | C | T | C | -0.0085 | 0.00876129   | 0.2907 | 0.409942 | 2  | 172818220 | 0.006761 | 0.2    | 2  | 1.74E+08 | 0.0015 | 3.57E-08 |
| rs12477385 | T | G | T | G | 0.0109  | -0.00155702  | 0.2264 | 0.356868 | 2  | 165288340 | 0.007004 | 0.82   | 2  | 1.66E+08 | 0.0017 | 7.15E-11 |
| rs12478156 | T | C | T | C | 0.0108  | 0.00318178   | 0.6378 | 0.610471 | 2  | 163523148 | 0.007019 | 0.65   | 2  | 1.64E+08 | 0.0015 | 1.24E-13 |
| rs12503522 | T | C | T | C | -0.0113 | -0.000417903 | 0.282  | 0.534822 | 4  | 93622082  | 0.006777 | 0.95   | 4  | 94543233 | 0.0016 | 3.93E-13 |
| rs12506221 | T | G | T | G | -0.013  | 0.00211391   | 0.436  | 0.441883 | 4  | 67033517  | 0.006782 | 0.76   | 4  | 67899235 | 0.0014 | 4.23E-20 |
| rs12516990 | C | G | C | G | -0.0099 | -0.0437458   | 0.2106 | 0.010087 | 5  | 146548125 | 0.034517 | 0.21   | 5  | 1.46E+08 | 0.0017 | 7.90E-09 |
| rs12519073 | T | C | T | C | -0.0107 | 0.000116365  | 0.2317 | 0.079251 | 5  | 137441073 | 0.012699 | 0.99   | 5  | 1.37E+08 | 0.0017 | 1.16E-10 |
| rs12524795 | T | C | T | C | 0.0102  | 0.00644377   | 0.4374 | 0.516811 | 6  | 3463840   | 0.006885 | 0.35   | 6  | 3464074  | 0.0014 | 5.28E-13 |
| rs12571549 | A | G | A | G | 0.0151  | -0.00380145  | 0.1368 | 0.419308 | 10 | 110010255 | 0.006871 | 0.58   | 10 | 1.12E+08 | 0.002  | 1.45E-13 |
| rs12574281 | A | C | A | C | -0.008  | -0.00129784  | 0.631  | 0.739914 | 11 | 131335526 | 0.007732 | 0.87   | 11 | 1.31E+08 | 0.0015 | 3.04E-08 |
| rs12591647 | T | C | T | C | -0.0152 | 0.000920812  | 0.8171 | 0.28098  | 15 | 65667391  | 0.007417 | 0.9    | 15 | 65959729 | 0.0018 | 7.78E-17 |
| rs12601380 | A | C | A | C | -0.0082 | -0.00285064  | 0.5739 | 0.604947 | 17 | 36549144  | 0.007006 | 0.68   | 17 | 34904985 | 0.0014 | 7.42E-09 |
| rs12602286 | T | G | T | G | 0.016   | -0.00408149  | 0.8731 | 0.180355 | 17 | 19333641  | 0.008774 | 0.64   | 17 | 19236954 | 0.0021 | 4.62E-14 |
| rs12613500 | C | G | C | G | 0.0098  | -0.000226002 | 0.4238 | 0.418588 | 2  | 180063738 | 0.007048 | 0.97   | 2  | 1.81E+08 | 0.0014 | 4.82E-12 |
| rs12614263 | A | G | A | G | 0.0083  | -0.0232764   | 0.4959 | 0.213256 | 2  | 4076206   | 0.008287 | 0.005  | 2  | 4123797  | 0.0014 | 3.38E-09 |
| rs12620796 | A | C | A | C | 0.0121  | -0.00703234  | 0.5496 | 0.725985 | 2  | 51060711  | 0.007647 | 0.36   | 2  | 51287849 | 0.0019 | 9.25E-11 |
| rs12643771 | T | C | T | C | 0.013   | 0.00835698   | 0.3094 | 0.612632 | 4  | 139831949 | 0.007087 | 0.24   | 4  | 1.41E+08 | 0.0015 | 1.32E-17 |
| rs12646216 | T | C | T | C | 0.0084  | -0.00973323  | 0.3889 | 0.380644 | 4  | 45978039  | 0.006976 | 0.16   | 4  | 45980056 | 0.0014 | 4.56E-09 |
| rs12646523 | T | C | T | C | -0.0132 | 0.00809212   | 0.2483 | 0.663785 | 4  | 170023547 | 0.007036 | 0.25   | 4  | 1.71E+08 | 0.0016 | 3.79E-16 |
| rs12659776 | T | G | T | G | 0.0085  | 0.0208087    | 0.5399 | 0.345581 | 5  | 168194269 | 0.007107 | 0.0034 | 5  | 1.68E+08 | 0.0014 | 1.64E-09 |
| rs12667929 | T | C | A | C | -0.0123 | 0.00277971   | 0.133  | 0.28122  | 7  | 114871962 | 0.007676 | 0.72   | 7  | 1.15E+08 | 0.0021 | 2.98E-09 |
| rs12670376 | A | G | A | G | 0.0092  | 0.00281289   | 0.4464 | 0.555716 | 7  | 48783558  | 0.006932 | 0.68   | 7  | 48823154 | 0.0014 | 5.99E-11 |
| rs1267062  | C | G | C | G | 0.0113  | 0.0149496    | 0.1781 | 0.017531 | 2  | 161143755 | 0.025014 | 0.55   | 2  | 1.62E+08 | 0.0018 | 7.40E-10 |
| rs12694681 | T | G | T | G | 0.0102  | 0.00710432   | 0.6883 | 0.627522 | 2  | 225744525 | 0.006897 | 0.3    | 2  | 2.27E+08 | 0.0015 | 2.13E-11 |
| rs12750688 | C | G | C | G | 0.0116  | 0.0362229    | 0.7406 | 0.936119 | 1  | 98292064  | 0.014222 | 0.011  | 1  | 98757620 | 0.0016 | 6.64E-13 |
| rs12761761 | T | C | T | C | 0.0153  | -0.0127248   | 0.2395 | 0.138329 | 10 | 131961871 | 0.009813 | 0.19   | 10 | 1.34E+08 | 0.0017 | 4.79E-20 |
| rs12765185 | A | T | A | T | -0.0088 | 0.001711     | 0.2769 | 0.139769 | 10 | 133163573 | 0.009983 | 0.86   | 10 | 1.35E+08 | 0.0016 | 2.96E-08 |
| rs12774577 | T | C | T | C | 0.0142  | 0.0161538    | 0.8545 | 0.84318  | 10 | 103199730 | 0.009464 | 0.088  | 10 | 1.05E+08 | 0.002  | 8.69E-13 |
| rs12789313 | T | C | T | C | 0.0092  | -0.000734273 | 0.4907 | 0.880163 | 11 | 25037391  | 0.010058 | 0.94   | 11 | 25058937 | 0.0014 | 6.79E-11 |
| rs12790196 | T | C | T | C | -0.0101 | -0.00595512  | 0.3263 | 0.125841 | 11 | 57730375  | 0.010388 | 0.57   | 11 | 57497847 | 0.0015 | 3.29E-11 |
| rs12810587 | T | C | T | C | 0.0094  | 0.00143322   | 0.3256 | 0.715418 | 12 | 122191029 | 0.007393 | 0.85   | 12 | 1.23E+08 | 0.0015 | 3.70E-10 |

|             |   |   |   |   |         |              |        |          |    |           |          |         |    |          |        |          |
|-------------|---|---|---|---|---------|--------------|--------|----------|----|-----------|----------|---------|----|----------|--------|----------|
| rs12891042  | T | C | T | C | 0.0092  | -0.00825668  | 0.5853 | 0.622238 | 14 | 33549780  | 0.006977 | 0.24    | 14 | 34018986 | 0.0014 | 1.02E-10 |
| rs12891191  | C | G | C | G | 0.008   | 0.00558412   | 0.5179 | 0.146254 | 14 | 57633565  | 0.009568 | 0.56    | 14 | 58100283 | 0.0014 | 1.21E-08 |
| rs12912465  | T | C | T | C | -0.0104 | -0.0114906   | 0.269  | 0.017771 | 15 | 77017118  | 0.025179 | 0.65    | 15 | 77309459 | 0.0016 | 1.17E-10 |
| rs12952191  | T | C | T | C | -0.0081 | 0.012637     | 0.4895 | 0.620797 | 17 | 54000025  | 0.006897 | 0.067   | 17 | 52077386 | 0.0014 | 6.52E-09 |
| rs12957463  | A | G | A | G | 0.0146  | -0.00423353  | 0.7953 | 0.784582 | 18 | 39832264  | 0.008205 | 0.61    | 18 | 37412228 | 0.0018 | 9.20E-17 |
| rs12959103  | A | G | A | G | -0.009  | -0.0165264   | 0.3021 | 0.056436 | 18 | 52641394  | 0.014104 | 0.24    | 18 | 50167764 | 0.0015 | 3.91E-09 |
| rs12962845  | C | G | C | G | -0.0123 | -0.0247571   | 0.1325 | 0.191883 | 18 | 25074138  | 0.008654 | 0.0042  | 18 | 22654102 | 0.0021 | 2.38E-09 |
| rs12967010  | T | C | T | C | 0.0114  | -0.00891514  | 0.7746 | 0.920509 | 18 | 9645037   | 0.012441 | 0.47    | 18 | 9645035  | 0.0017 | 1.33E-11 |
| rs12970264  | A | G | A | G | -0.0085 | -0.00728673  | 0.4386 | 0.389529 | 18 | 79867950  | 0.00709  | 0.3     | 18 | 77627950 | 0.0014 | 1.61E-09 |
| rs12981405  | T | C | T | C | -0.0112 | -0.0078868   | 0.1664 | 0.289866 | 19 | 19540768  | 0.007419 | 0.29    | 19 | 19651577 | 0.0019 | 2.75E-09 |
| rs13010288  | T | G | T | G | 0.0198  | -0.0377746   | 0.1288 | 0.012968 | 2  | 51597374  | 0.029961 | 0.21    | 2  | 51824512 | 0.0021 | 3.44E-21 |
| rs13016316  | A | C | A | C | -0.0138 | -0.0139355   | 0.0908 | 0.254803 | 2  | 224472471 | 0.007976 | 0.081   | 2  | 2.25E+08 | 0.0024 | 1.67E-08 |
| rs1301838   | T | C | T | C | -0.0096 | 0.0122242    | 0.3227 | 0.172911 | 11 | 99799783  | 0.009162 | 0.18    | 11 | 99670514 | 0.0015 | 1.29E-10 |
| rs13029602  | T | C | T | C | -0.0092 | 0.000706593  | 0.6059 | 0.753842 | 2  | 29352009  | 0.007812 | 0.93    | 2  | 29574875 | 0.0014 | 1.33E-10 |
| rs13050131  | A | C | A | C | -0.0081 | -0.00452853  | 0.6647 | 0.888329 | 21 | 18645800  | 0.010494 | 0.67    | 21 | 20018118 | 0.0015 | 4.40E-08 |
| rs13072665  | A | T | A | G | -0.025  | 0.00592594   | 0.9451 | 0.064842 | 3  | 69944162  | 0.014202 | 0.68    | 3  | 69930625 | 0.0031 | 1.09E-15 |
| rs13099165  | T | G | T | G | -0.0118 | -0.0115545   | 0.2029 | 0.057877 | 3  | 169022637 | 0.014846 | 0.44    | 3  | 1.69E+08 | 0.0017 | 1.09E-11 |
| rs13117856  | A | T | A | T | 0.0084  | 0.0084746    | 0.7054 | 0.926513 | 4  | 173087608 | 0.013108 | 0.52    | 4  | 1.74E+08 | 0.0015 | 4.64E-08 |
| rs13130765  | C | G | C | G | -0.0091 | -0.00280886  | 0.4721 | 0.327089 | 4  | 45161316  | 0.007323 | 0.7     | 4  | 45163333 | 0.0014 | 1.89E-10 |
| rs13133213  | A | G | A | G | 0.0096  | -0.00121832  | 0.498  | 0.623679 | 4  | 15645171  | 0.007082 | 0.86    | 4  | 15646794 | 0.0014 | 7.57E-12 |
| rs13145650  | T | C | T | C | -0.0173 | -0.00783667  | 0.917  | 0.787464 | 4  | 122042189 | 0.008362 | 0.35    | 4  | 1.23E+08 | 0.0025 | 8.99E-12 |
| rs13154429  | C | G | C | G | -0.0136 | 0.00785953   | 0.1016 | 0.110711 | 5  | 60313123  | 0.010863 | 0.47    | 5  | 59608950 | 0.0023 | 5.02E-09 |
| rs13163062  | T | C | T | C | 0.0115  | -0.0100784   | 0.426  | 0.416427 | 5  | 107619750 | 0.006843 | 0.14    | 5  | 1.07E+08 | 0.0014 | 4.43E-16 |
| rs13163845  | T | C | T | C | -0.0149 | -0.00165674  | 0.8488 | 0.67195  | 5  | 3264275   | 0.007234 | 0.82    | 5  | 3264389  | 0.002  | 4.66E-14 |
| rs13168136  | A | G | A | G | -0.0092 | 0.014441     | 0.7668 | 0.42171  | 5  | 26898520  | 0.006831 | 0.035   | 5  | 26898629 | 0.0017 | 2.57E-08 |
| rs13169187  | A | G | A | G | -0.0079 | -0.00652103  | 0.5374 | 0.727906 | 5  | 52421123  | 0.007588 | 0.39    | 5  | 51716957 | 0.0014 | 2.01E-08 |
| rs13177031  | A | T | A | T | -0.0085 | 0.018179     | 0.3703 | 0.331892 | 5  | 61557696  | 0.007262 | 0.012   | 5  | 60853523 | 0.0015 | 4.88E-09 |
| rs13190235  | T | C | T | C | -0.0138 | 0.0272499    | 0.9036 | 0.720221 | 5  | 66668955  | 0.007585 | 0.00033 | 5  | 65964783 | 0.0024 | 5.66E-09 |
| rs13197257  | T | G | T | G | 0.0109  | 0.00365827   | 0.279  | 0.111191 | 6  | 128012537 | 0.010825 | 0.74    | 6  | 1.28E+08 | 0.0016 | 2.83E-12 |
| rs1320139   | C | G | C | G | -0.0149 | 0.00564571   | 0.427  | 0.568684 | 2  | 143400608 | 0.006795 | 0.41    | 2  | 1.44E+08 | 0.0014 | 7.62E-26 |
| rs13212041  | T | C | T | C | 0.0101  | 0.00825724   | 0.7978 | 0.804755 | 6  | 77461407  | 0.008539 | 0.33    | 6  | 78171124 | 0.0018 | 7.42E-09 |
| rs13246220  | T | G | T | G | -0.0093 | 0.00394139   | 0.6117 | 0.651777 | 7  | 39284654  | 0.007166 | 0.58    | 7  | 39324253 | 0.0014 | 8.53E-11 |
| rs13266287  | A | T | A | T | -0.0085 | -0.00206179  | 0.6687 | 0.240154 | 8  | 18014089  | 0.007914 | 0.79    | 8  | 17871598 | 0.0015 | 1.75E-08 |
| rs13281564  | A | G | A | G | 0.0088  | -0.010765    | 0.5129 | 0.619597 | 8  | 118471077 | 0.006973 | 0.12    | 8  | 1.19E+08 | 0.0014 | 4.02E-10 |
| rs13284516  | C | G | C | G | -0.0082 | -0.00256618  | 0.5452 | 0.379923 | 9  | 23423787  | 0.00694  | 0.71    | 9  | 23423785 | 0.0014 | 6.78E-09 |
| rs1329125   | T | C | T | C | -0.0097 | 0.013441     | 0.3273 | 0.04635  | 1  | 234605134 | 0.016354 | 0.41    | 1  | 2.35E+08 | 0.0015 | 8.37E-11 |
| rs13296345  | T | C | T | C | 0.009   | 0.00969176   | 0.6299 | 0.681076 | 9  | 14791350  | 0.007248 | 0.18    | 9  | 14791348 | 0.0015 | 5.35E-10 |
| rs13318986  | A | G | A | G | 0.0124  | 0.00630709   | 0.3311 | 0.394813 | 3  | 82484488  | 0.007134 | 0.38    | 3  | 82533639 | 0.0015 | 1.17E-16 |
| rs13327482  | A | G | A | G | -0.0121 | 0.00649265   | 0.8221 | 0.96806  | 3  | 197061492 | 0.018813 | 0.73    | 3  | 1.97E+08 | 0.0018 | 4.47E-11 |
| rs1334297   | A | G | A | G | 0.0257  | 0.00812431   | 0.7375 | 0.908261 | 13 | 57761241  | 0.011932 | 0.5     | 13 | 58335375 | 0.0016 | 2.53E-58 |
| rs1335482   | T | C | T | C | 0.0096  | 0.00391158   | 0.5295 | 0.959414 | 1  | 78137779  | 0.016445 | 0.81    | 1  | 78603463 | 0.0014 | 1.01E-11 |
| rs13361043  | T | C | T | C | -0.0158 | -0.00768825  | 0.9329 | 0.597743 | 5  | 59023136  | 0.006868 | 0.26    | 5  | 58318963 | 0.0028 | 1.84E-08 |
| rs13381557  | A | G | A | G | -0.0087 | -0.00474961  | 0.5413 | 0.629683 | 18 | 46933408  | 0.00714  | 0.51    | 18 | 44513371 | 0.0014 | 7.40E-10 |
| rs13397444  | A | G | A | G | 0.0095  | 0.000691771  | 0.2977 | 0.184438 | 2  | 171759913 | 0.008867 | 0.94    | 2  | 1.73E+08 | 0.0015 | 6.00E-10 |
| rs13398860  | A | G | A | G | 0.0086  | -0.00589345  | 0.6529 | 0.774015 | 2  | 50465802  | 0.00805  | 0.46    | 2  | 50692940 | 0.0015 | 5.89E-09 |
| rs13402497  | A | T | A | T | -0.008  | -0.000348073 | 0.4902 | 0.487752 | 2  | 115068741 | 0.006897 | 0.96    | 2  | 1.16E+08 | 0.0014 | 1.33E-08 |
| rs1340561   | T | C | A | C | 0.0152  | 0.0432193    | 0.0738 | 0.017531 | 13 | 58910478  | 0.024738 | 0.081   | 13 | 59496462 | 0.0027 | 1.56E-08 |
| rs13417733  | T | C | T | C | -0.0178 | -0.0540439   | 0.0583 | 0.988953 | 2  | 174357348 | 0.032306 | 0.094   | 2  | 1.75E+08 | 0.003  | 2.91E-09 |
| rs13422673  | T | C | T | C | -0.011  | 0.0022627    | 0.4659 | 0.165946 | 2  | 154617843 | 0.009176 | 0.81    | 2  | 1.55E+08 | 0.0014 | 6.48E-15 |
| rs13425585  | C | G | C | G | -0.0089 | 0.0196653    | 0.5084 | 0.243276 | 2  | 156630761 | 0.007864 | 0.012   | 2  | 1.57E+08 | 0.0014 | 2.32E-10 |
| rs137079    | T | C | T | C | 0.0128  | 0.0130112    | 0.1375 | 0.129203 | 22 | 42581901  | 0.010222 | 0.2     | 22 | 42977907 | 0.002  | 3.06E-10 |
| rs139244147 | A | G | A | G | -0.0193 | 0.000581064  | 0.0604 | 0.130163 | 7  | 112272683 | 0.010228 | 0.95    | 7  | 1.12E+08 | 0.003  | 7.71E-11 |
| rs1392816   | T | C | T | C | 0.0082  | -0.00483966  | 0.3831 | 0.15586  | 1  | 66015505  | 0.009324 | 0.6     | 1  | 66481188 | 0.0014 | 1.61E-08 |
| rs1404549   | A | G | A | G | -0.0089 | -0.00959957  | 0.3278 | 0.67243  | 3  | 65469248  | 0.00714  | 0.18    | 3  | 65454923 | 0.0015 | 2.38E-09 |
| rs1405876   | T | G | T | G | 0.0109  | 0.0055993    | 0.6403 | 0.902257 | 7  | 86608265  | 0.0114   | 0.62    | 7  | 86237581 | 0.0015 | 7.84E-14 |

|             |   |   |   |   |         |              |        |          |    |           |          |       |    |          |        |          |
|-------------|---|---|---|---|---------|--------------|--------|----------|----|-----------|----------|-------|----|----------|--------|----------|
| rs1408284   | C | G | C | G | -0.0127 | -0.0125109   | 0.8639 | 0.959894 | 6  | 93183868  | 0.017408 | 0.47  | 6  | 93893586 | 0.002  | 5.71E-10 |
| rs140954946 | T | C | T | C | 0.0176  | 0.0148096    | 0.0843 | 0.009606 | 16 | 89943764  | 0.035319 | 0.67  | 16 | 89990843 | 0.0026 | 6.25E-12 |
| rs141729694 | T | C | T | C | 0.0195  | -0.00544745  | 0.0768 | 0.054515 | 5  | 88703554  | 0.014983 | 0.72  | 5  | 87999371 | 0.0026 | 1.49E-13 |
| rs142014757 | A | G | A | G | 0.0102  | 0.0359538    | 0.8085 | 0.994236 | 18 | 79751268  | 0.045477 | 0.43  | 18 | 77511268 | 0.0018 | 1.74E-08 |
| rs1426619   | T | C | T | C | 0.0096  | 0.00153447   | 0.4346 | 0.527378 | 10 | 88331783  | 0.006843 | 0.82  | 10 | 90091540 | 0.0014 | 1.40E-11 |
| rs1427298   | T | C | T | C | 0.0086  | -0.00052741  | 0.4264 | 0.557397 | 2  | 144456854 | 0.006813 | 0.94  | 2  | 1.45E+08 | 0.0014 | 1.33E-09 |
| rs1427829   | A | G | A | G | -0.0083 | -0.0106353   | 0.4546 | 0.395053 | 12 | 89366967  | 0.007216 | 0.14  | 12 | 89760744 | 0.0014 | 3.29E-09 |
| rs143743568 | A | G | A | G | 0.0118  | 0.00029474   | 0.154  | 0.449808 | 22 | 38893009  | 0.006697 | 0.96  | 22 | 39289014 | 0.002  | 4.99E-09 |
| rs143812851 | A | G | A | G | -0.0113 | -0.00924319  | 0.1735 | 0.180836 | 16 | 61739945  | 0.009007 | 0.3   | 16 | 61773849 | 0.0019 | 1.03E-09 |
| rs1440930   | C | G | C | G | 0.0081  | 0.000829348  | 0.4535 | 0.48439  | 4  | 65036624  | 0.006812 | 0.9   | 4  | 65902342 | 0.0014 | 8.94E-09 |
| rs1445591   | A | G | A | G | 0.0085  | 0.00186681   | 0.6986 | 0.948847 | 1  | 72494328  | 0.014823 | 0.9   | 1  | 72960011 | 0.0015 | 4.02E-08 |
| rs145489304 | T | C | T | A | 0.024   | 0.00742687   | 0.0426 | 0.055716 | 1  | 75180787  | 0.014662 | 0.61  | 1  | 75562222 | 0.0035 | 5.88E-12 |
| rs1464297   | T | C | T | C | -0.0109 | 0.00651944   | 0.649  | 0.505043 | 2  | 139896180 | 0.006792 | 0.34  | 2  | 1.41E+08 | 0.0015 | 1.49E-13 |
| rs1467737   | T | C | T | C | -0.0084 | -0.000147422 | 0.4746 | 0.438761 | 9  | 122220221 | 0.006894 | 0.98  | 9  | 1.25E+08 | 0.0014 | 3.52E-09 |
| rs150537577 | A | G | A | G | -0.0151 | 0.00232838   | 0.9195 | 0.878482 | 4  | 711840    | 0.01043  | 0.82  | 4  | 705629   | 0.0026 | 9.50E-09 |
| rs151381    | T | C | T | C | -0.0087 | 0.0066075    | 0.4927 | 0.442363 | 4  | 102197611 | 0.006841 | 0.33  | 4  | 1.03E+08 | 0.0014 | 7.01E-10 |
| rs1527878   | A | G | A | G | -0.0105 | -0.00464379  | 0.7566 | 0.944525 | 2  | 182581808 | 0.01501  | 0.76  | 2  | 1.83E+08 | 0.0016 | 1.49E-10 |
| rs1529597   | A | C | A | C | 0.0223  | -0.0604895   | 0.9637 | 0.992315 | 15 | 56897866  | 0.037141 | 0.1   | 15 | 57190064 | 0.0038 | 3.36E-09 |
| rs1538389   | T | C | T | C | -0.0109 | 0.000670539  | 0.1894 | 0.087176 | 1  | 111784522 | 0.012265 | 0.96  | 1  | 1.12E+08 | 0.0018 | 1.27E-09 |
| rs1542354   | A | G | A | G | -0.0084 | -0.011098    | 0.4764 | 0.615754 | 2  | 220949365 | 0.007165 | 0.12  | 2  | 2.22E+08 | 0.0014 | 2.72E-09 |
| rs1544      | A | G | A | G | -0.0096 | 0.00744361   | 0.2636 | 0.293228 | 21 | 31713272  | 0.007495 | 0.32  | 21 | 33085585 | 0.0016 | 1.76E-09 |
| rs1554798   | A | C | A | C | -0.008  | -0.00493877  | 0.4667 | 0.600624 | 2  | 155978547 | 0.007031 | 0.48  | 2  | 1.57E+08 | 0.0014 | 1.22E-08 |
| rs1564347   | T | G | T | G | 0.0088  | -0.00111625  | 0.3433 | 0.555716 | 15 | 73146507  | 0.0068   | 0.87  | 15 | 73438848 | 0.0015 | 2.39E-09 |
| rs1569092   | A | G | A | G | 0.016   | -0.0118079   | 0.152  | 0.092219 | 1  | 74393040  | 0.011743 | 0.31  | 1  | 74858724 | 0.002  | 2.12E-16 |
| rs1593022   | T | G | T | G | -0.0099 | -0.00357065  | 0.2256 | 0.150576 | 5  | 107349862 | 0.009269 | 0.7   | 5  | 1.07E+08 | 0.0017 | 4.69E-09 |
| rs1603460   | T | G | T | G | 0.009   | 0.000356336  | 0.4206 | 0.345341 | 12 | 22939692  | 0.00716  | 0.96  | 12 | 23092626 | 0.0014 | 2.20E-10 |
| rs162445    | A | G | A | G | 0.0152  | -0.00931522  | 0.0788 | 0.221182 | 5  | 7943133   | 0.008396 | 0.27  | 5  | 7943246  | 0.0026 | 5.72E-09 |
| rs164938    | T | G | T | G | -0.0088 | -0.00185598  | 0.3922 | 0.71854  | 3  | 10273419  | 0.007561 | 0.81  | 3  | 10315103 | 0.0014 | 1.05E-09 |
| rs1656614   | C | G | C | G | 0.0122  | 0.00550377   | 0.314  | 0.094861 | 15 | 47508316  | 0.011525 | 0.63  | 15 | 47800513 | 0.0015 | 6.91E-16 |
| rs1671269   | T | C | T | C | -0.01   | 0.0111324    | 0.7524 | 0.32757  | 18 | 52583601  | 0.007302 | 0.13  | 18 | 50109971 | 0.0016 | 7.40E-10 |
| rs1671770   | A | C | A | C | 0.0125  | 0.00243409   | 0.1786 | 0.170029 | 12 | 120508765 | 0.009197 | 0.79  | 12 | 1.21E+08 | 0.0018 | 9.23E-12 |
| rs16851779  | T | C | T | C | -0.0153 | 0.0223172    | 0.9246 | 0.977426 | 2  | 214325226 | 0.023109 | 0.33  | 2  | 2.15E+08 | 0.0027 | 9.24E-09 |
| rs16871807  | T | C | T | C | 0.009   | -0.00202185  | 0.3297 | 0.563401 | 5  | 3437183   | 0.006888 | 0.77  | 5  | 3437297  | 0.0015 | 1.59E-09 |
| rs1689510   | C | G | C | G | 0.0194  | -0.00113333  | 0.3315 | 0.196206 | 12 | 56002984  | 0.008567 | 0.89  | 12 | 56396768 | 0.0015 | 1.35E-38 |
| rs16901689  | T | G | T | G | 0.0111  | 0.000351523  | 0.1634 | 0.082613 | 5  | 11507256  | 0.012389 | 0.98  | 5  | 11507368 | 0.0019 | 5.17E-09 |
| rs1693584   | T | C | T | C | -0.0087 | -0.0106004   | 0.6856 | 0.735591 | 8  | 100736689 | 0.007836 | 0.18  | 8  | 1.02E+08 | 0.0015 | 8.79E-09 |
| rs16958559  | T | G | T | G | 0.0096  | 0.0537902    | 0.7865 | 0.989433 | 17 | 57581872  | 0.032256 | 0.095 | 17 | 55659233 | 0.0017 | 2.07E-08 |
| rs16975275  | A | G | A | G | -0.0102 | 0.00798763   | 0.2306 | 0.247358 | 15 | 95503327  | 0.007915 | 0.31  | 15 | 96046556 | 0.0017 | 8.14E-10 |
| rs17069646  | T | C | T | C | 0.0085  | 0.0150398    | 0.6881 | 0.630163 | 5  | 168025246 | 0.007081 | 0.034 | 5  | 1.67E+08 | 0.0015 | 2.01E-08 |
| rs17110109  | T | C | T | C | -0.0093 | -0.00872295  | 0.6163 | 0.526177 | 12 | 54275124  | 0.006851 | 0.2   | 12 | 54668908 | 0.0014 | 1.47E-10 |
| rs17133297  | A | T | A | T | -0.0146 | 0.00909237   | 0.8958 | 0.661864 | 7  | 3415769   | 0.007108 | 0.2   | 7  | 3455401  | 0.0023 | 2.28E-10 |
| rs17144467  | A | C | A | C | 0.0098  | 0.000458658  | 0.6867 | 0.633285 | 7  | 122458728 | 0.007208 | 0.95  | 7  | 1.22E+08 | 0.0015 | 8.74E-11 |
| rs17148998  | A | G | A | G | 0.0101  | -0.00104113  | 0.2042 | 0.027618 | 10 | 10867438  | 0.021095 | 0.96  | 10 | 10909401 | 0.0017 | 6.98E-09 |
| rs17170519  | C | G | C | G | 0.0132  | 0.00527481   | 0.8991 | 0.712296 | 7  | 32821618  | 0.007343 | 0.47  | 7  | 32861230 | 0.0023 | 1.99E-08 |
| rs1717204   | A | C | A | C | -0.0117 | 0.00299569   | 0.1818 | 0.204371 | 3  | 118742298 | 0.008378 | 0.72  | 3  | 1.18E+08 | 0.0018 | 1.20E-10 |
| rs1718188   | A | T | A | T | 0.0096  | -0.004465    | 0.4365 | 0.560279 | 12 | 120906090 | 0.006744 | 0.51  | 12 | 1.21E+08 | 0.0014 | 9.05E-12 |
| rs17186106  | T | G | T | G | 0.0108  | 0.00312421   | 0.1771 | 0.145293 | 4  | 90782090  | 0.009683 | 0.75  | 4  | 91703241 | 0.0018 | 3.95E-09 |
| rs17246529  | T | C | T | A | 0.0185  | 0.0643856    | 0.942  | 0.012968 | 2  | 156136046 | 0.029948 | 0.032 | 2  | 1.57E+08 | 0.003  | 6.44E-10 |
| rs17248751  | A | G | A | G | -0.0136 | 0.00702968   | 0.7827 | 0.991835 | 16 | 61545714  | 0.037158 | 0.85  | 16 | 61579618 | 0.0017 | 1.28E-15 |
| rs1729412   | T | C | T | C | -0.0107 | -0.00539344  | 0.4224 | 0.74928  | 2  | 200218875 | 0.007915 | 0.5   | 2  | 2.01E+08 | 0.0014 | 4.05E-14 |
| rs173003    | A | C | A | C | -0.0082 | -0.0107025   | 0.4934 | 0.331652 | 19 | 35750059  | 0.007216 | 0.14  | 19 | 36240960 | 0.0014 | 5.50E-09 |
| rs1734370   | A | G | A | G | 0.0099  | 0.0129091    | 0.7171 | 0.620077 | 2  | 10838584  | 0.007051 | 0.067 | 2  | 10978710 | 0.0016 | 2.42E-10 |
| rs1738050   | C | G | C | G | -0.0093 | 0.00572145   | 0.6197 | 0.523535 | 1  | 44241623  | 0.00676  | 0.4   | 1  | 44707295 | 0.0014 | 1.42E-10 |
| rs17411339  | A | G | A | G | 0.014   | -0.00370545  | 0.5612 | 0.959894 | 18 | 53280989  | 0.017097 | 0.83  | 18 | 50807359 | 0.0014 | 5.10E-23 |
| rs17428076  | C | G | C | G | 0.0137  | 0.00527273   | 0.7598 | 0.928674 | 2  | 171987022 | 0.013088 | 0.69  | 2  | 1.73E+08 | 0.0016 | 6.41E-17 |

|             |   |   |   |   |         |              |        |          |    |           |          |       |    |          |        |          |
|-------------|---|---|---|---|---------|--------------|--------|----------|----|-----------|----------|-------|----|----------|--------|----------|
| rs1747714   | T | C | T | C | 0.0106  | 0.00441852   | 0.5287 | 0.229587 | 10 | 11119353  | 0.008089 | 0.58  | 10 | 11161316 | 0.0014 | 3.82E-14 |
| rs1747817   | T | C | T | C | -0.0092 | 0.0108493    | 0.7614 | 0.90682  | 1  | 197742362 | 0.011497 | 0.35  | 1  | 1.98E+08 | 0.0016 | 2.29E-08 |
| rs17489649  | A | G | A | G | 0.0127  | 0.0259511    | 0.6788 | 0.978867 | 5  | 109820483 | 0.023837 | 0.28  | 5  | 1.09E+08 | 0.0015 | 2.77E-17 |
| rs175325    | A | T | A | T | -0.01   | 0.0019284    | 0.5966 | 0.289625 | 20 | 22336672  | 0.00734  | 0.79  | 20 | 22317310 | 0.0014 | 2.24E-12 |
| rs17563464  | A | C | A | C | -0.0147 | 0.00137561   | 0.2173 | 0.012728 | 5  | 26913666  | 0.030792 | 0.96  | 5  | 26913774 | 0.0017 | 1.74E-17 |
| rs17565975  | A | G | A | G | -0.0106 | -0.00517172  | 0.5563 | 0.629203 | 11 | 111716226 | 0.007134 | 0.47  | 11 | 1.12E+08 | 0.0014 | 5.54E-14 |
| rs17568389  | A | T | A | T | 0.0127  | -0.000602101 | 0.5087 | 0.266811 | 7  | 8052246   | 0.007744 | 0.94  | 7  | 8091876  | 0.0014 | 1.62E-19 |
| rs1758747   | A | G | A | G | 0.0092  | 0.0050374    | 0.6962 | 0.633045 | 9  | 25300645  | 0.007091 | 0.48  | 9  | 25300643 | 0.0015 | 1.64E-09 |
| rs176218    | T | G | T | G | 0.02    | 0.0014372    | 0.1958 | 0.519212 | 14 | 29131300  | 0.006662 | 0.83  | 14 | 29600506 | 0.0018 | 1.10E-29 |
| rs17622379  | T | C | T | C | -0.0113 | 0.0152584    | 0.1853 | 0.151537 | 17 | 52649486  | 0.00956  | 0.11  | 17 | 50726846 | 0.0018 | 4.52E-10 |
| rs17669337  | T | C | T | C | -0.011  | 0.0143027    | 0.4133 | 0.497358 | 5  | 92852225  | 0.007053 | 0.043 | 5  | 92187932 | 0.0014 | 1.10E-14 |
| rs17686649  | T | C | T | C | -0.0098 | -0.0279639   | 0.2192 | 0.058598 | 6  | 92858809  | 0.014015 | 0.046 | 6  | 93568527 | 0.0017 | 6.37E-09 |
| rs17732878  | T | C | T | C | -0.0095 | -0.00762691  | 0.7912 | 0.935879 | 17 | 7459040   | 0.013406 | 0.57  | 17 | 7362359  | 0.0017 | 4.06E-08 |
| rs17742342  | A | C | A | C | -0.0119 | 0.00188564   | 0.802  | 0.893852 | 2  | 147876367 | 0.011009 | 0.86  | 2  | 1.49E+08 | 0.0018 | 1.59E-11 |
| rs17747544  | A | G | A | G | -0.009  | -0.000461763 | 0.4701 | 0.238953 | 20 | 42583273  | 0.007943 | 0.95  | 20 | 41211913 | 0.0014 | 1.74E-10 |
| rs1779549   | A | C | A | C | 0.0081  | 0.00291824   | 0.46   | 0.792027 | 14 | 84173672  | 0.008313 | 0.73  | 14 | 84640016 | 0.0014 | 8.45E-09 |
| rs17882802  | A | G | A | G | 0.0084  | 0.0173897    | 0.4295 | 0.073247 | 10 | 100223656 | 0.013181 | 0.19  | 10 | 1.02E+08 | 0.0014 | 3.00E-09 |
| rs1792602   | A | G | A | G | -0.0097 | 0.0125574    | 0.3824 | 0.301393 | 11 | 90706465  | 0.00744  | 0.091 | 11 | 90439633 | 0.0014 | 1.90E-11 |
| rs181216    | T | C | T | C | -0.0104 | -0.0256044   | 0.2225 | 0.978867 | 17 | 58104711  | 0.023835 | 0.28  | 17 | 56179482 | 0.0017 | 8.19E-10 |
| rs1835339   | T | C | T | C | 0.0084  | -0.00654268  | 0.6132 | 0.64073  | 2  | 182528953 | 0.007074 | 0.36  | 2  | 1.83E+08 | 0.0014 | 5.59E-09 |
| rs183869217 | C | G | C | G | 0.0174  | -0.0047914   | 0.9409 | 0.95365  | 2  | 81524216  | 0.016185 | 0.77  | 2  | 81751340 | 0.003  | 4.72E-09 |
| rs1841023   | A | C | A | C | -0.0092 | 6.57E-05     | 0.6904 | 0.802834 | 4  | 162814432 | 0.008593 | 0.99  | 4  | 1.64E+08 | 0.0015 | 1.64E-09 |
| rs1842713   | A | G | A | G | -0.0117 | 0.00373658   | 0.7882 | 0.462776 | 17 | 34873366  | 0.006745 | 0.58  | 17 | 33200385 | 0.0017 | 9.67E-12 |
| rs1843815   | A | T | A | T | 0.0077  | -0.000130979 | 0.4635 | 0.428915 | 1  | 98124159  | 0.00697  | 0.99  | 1  | 98589715 | 0.0014 | 4.40E-08 |
| rs1861786   | A | G | A | G | -0.0081 | 0.00132579   | 0.3813 | 0.492795 | 12 | 13847533  | 0.006938 | 0.85  | 12 | 14000467 | 0.0014 | 2.39E-08 |
| rs1865955   | T | C | T | C | 0.0122  | -0.00197663  | 0.8244 | 0.463256 | 10 | 117078479 | 0.006628 | 0.77  | 10 | 1.19E+08 | 0.0019 | 4.06E-11 |
| rs1866823   | A | G | A | G | 0.0107  | 0.00667783   | 0.5444 | 0.404179 | 8  | 56524018  | 0.00695  | 0.34  | 8  | 57436577 | 0.0014 | 3.09E-14 |
| rs187580    | T | G | T | G | -0.0104 | 0.0035326    | 0.7671 | 0.820365 | 5  | 103291654 | 0.00879  | 0.69  | 5  | 1.03E+08 | 0.0017 | 3.56E-10 |
| rs1880692   | A | G | A | G | 0.0086  | 0.00896624   | 0.5346 | 0.483429 | 11 | 80627025  | 0.006897 | 0.19  | 11 | 80338069 | 0.0014 | 1.09E-09 |
| rs1890132   | T | C | T | C | -0.0089 | -0.0224287   | 0.7056 | 0.974304 | 1  | 199458193 | 0.019791 | 0.26  | 1  | 1.99E+08 | 0.0015 | 6.56E-09 |
| rs1898111   | A | G | A | G | 0.0101  | 0.00626879   | 0.8245 | 0.739433 | 15 | 47600101  | 0.007947 | 0.43  | 15 | 47892298 | 0.0018 | 4.72E-08 |
| rs1910005   | T | C | T | C | -0.009  | 0.00247014   | 0.708  | 0.683718 | 5  | 81815047  | 0.00726  | 0.73  | 5  | 81110866 | 0.0015 | 5.66E-09 |
| rs1918394   | T | C | T | C | 0.0119  | 0.00135621   | 0.1658 | 0.303554 | 3  | 74854753  | 0.007418 | 0.85  | 3  | 74903904 | 0.0019 | 3.04E-10 |
| rs1933264   | T | C | T | C | 0.01    | 0.00268979   | 0.7491 | 0.65658  | 6  | 153070483 | 0.007162 | 0.71  | 6  | 1.53E+08 | 0.0016 | 5.85E-10 |
| rs1952183   | A | G | A | G | -0.0089 | -4.75E-05    | 0.5078 | 0.731028 | 14 | 89377767  | 0.007836 | 1     | 14 | 89844111 | 0.0014 | 2.76E-10 |
| rs1955250   | A | C | A | C | -0.014  | 0.00888833   | 0.9137 | 0.85951  | 4  | 117593081 | 0.00957  | 0.35  | 4  | 1.19E+08 | 0.0025 | 2.26E-08 |
| rs1980129   | A | G | A | G | 0.0085  | -0.00321285  | 0.4738 | 0.548991 | 4  | 17044288  | 0.006796 | 0.64  | 4  | 17045911 | 0.0014 | 1.17E-09 |
| rs1991585   | T | C | T | C | -0.0101 | -0.014116    | 0.706  | 0.225985 | 2  | 16465902  | 0.007893 | 0.074 | 2  | 16647170 | 0.0015 | 6.26E-11 |
| rs1995181   | A | T | A | T | -0.0078 | 0.0158313    | 0.4598 | 0.302354 | 12 | 24042114  | 0.007458 | 0.034 | 12 | 24195048 | 0.0014 | 3.61E-08 |
| rs199968    | T | C | C | G | 0.0207  | -0.0106691   | 0.0485 | 0.020893 | 1  | 181638002 | 0.023685 | 0.65  | 1  | 1.82E+08 | 0.0033 | 2.48E-10 |
| rs2007655   | T | G | T | G | 0.0086  | 0.011387     | 0.4976 | 0.592939 | 10 | 34297761  | 0.006864 | 0.097 | 10 | 34586689 | 0.0014 | 8.64E-10 |
| rs2011603   | A | G | A | G | -0.0091 | 0.00613617   | 0.7359 | 0.589817 | 4  | 18023861  | 0.006827 | 0.37  | 4  | 18025484 | 0.0016 | 1.12E-08 |
| rs2014830   | T | C | T | C | 0.011   | -0.00252767  | 0.3139 | 0.753122 | 3  | 50134964  | 0.007895 | 0.75  | 3  | 50172397 | 0.0015 | 4.72E-13 |
| rs201490    | T | C | T | C | -0.0112 | -0.00071029  | 0.559  | 0.132565 | 7  | 102108630 | 0.009774 | 0.94  | 7  | 1.02E+08 | 0.0019 | 5.92E-09 |
| rs2023016   | C | G | C | G | 0.0107  | -0.00372163  | 0.7899 | 0.535062 | 6  | 162560234 | 0.006892 | 0.59  | 6  | 1.63E+08 | 0.0017 | 4.91E-10 |
| rs2024568   | T | C | T | C | -0.0097 | 0.00822212   | 0.2535 | 0.457012 | 20 | 46103450  | 0.006825 | 0.23  | 20 | 44732089 | 0.0016 | 1.61E-09 |
| rs2029401   | A | G | A | G | -0.0091 | 0.00286815   | 0.4278 | 0.222863 | 5  | 9355323   | 0.007939 | 0.72  | 5  | 92891029 | 0.0014 | 1.53E-10 |
| rs2034631   | T | C | T | C | 0.0089  | -0.00477779  | 0.6508 | 0.558117 | 4  | 81304375  | 0.006981 | 0.49  | 4  | 82225529 | 0.0015 | 2.64E-09 |
| rs2039204   | A | T | A | T | 0.0082  | 0.00201959   | 0.5296 | 0.329971 | 9  | 127608828 | 0.007189 | 0.78  | 9  | 1.3E+08  | 0.0014 | 5.23E-09 |
| rs2055940   | A | G | A | G | 0.0082  | 0.00704961   | 0.3215 | 0.143612 | 4  | 46995896  | 0.009796 | 0.47  | 4  | 46997913 | 0.0015 | 4.95E-08 |
| rs2077235   | T | C | T | C | 0.0097  | 0.0133229    | 0.2373 | 0.31196  | 16 | 3579226   | 0.007341 | 0.07  | 16 | 3629227  | 0.0017 | 5.20E-09 |
| rs2081652   | A | T | A | T | 0.0123  | 0.00895222   | 0.661  | 0.864553 | 4  | 158941761 | 0.010011 | 0.37  | 4  | 1.6E+08  | 0.0015 | 1.09E-16 |
| rs2082317   | T | C | T | C | -0.0078 | -0.0120694   | 0.5301 | 0.506484 | 4  | 170903398 | 0.006888 | 0.08  | 4  | 1.72E+08 | 0.0014 | 3.19E-08 |
| rs2088913   | A | G | A | G | 0.0081  | -0.00137433  | 0.5732 | 0.497358 | 3  | 117591222 | 0.006832 | 0.84  | 3  | 1.17E+08 | 0.0014 | 9.61E-09 |
| rs2092248   | T | C | T | C | -0.0083 | 0.00616817   | 0.331  | 0.329971 | 6  | 19205227  | 0.007424 | 0.41  | 6  | 19205458 | 0.0015 | 2.43E-08 |

|           |   |   |   |   |         |              |        |          |    |           |          |        |    |          |        |          |
|-----------|---|---|---|---|---------|--------------|--------|----------|----|-----------|----------|--------|----|----------|--------|----------|
| rs2098526 | A | G | A | G | -0.0241 | -0.0160039   | 0.0279 | 0.102546 | 2  | 161988766 | 0.011198 | 0.15   | 2  | 1.63E+08 | 0.0043 | 1.62E-08 |
| rs2100249 | T | G | T | G | -0.0089 | 0.0104341    | 0.3488 | 0.529059 | 7  | 114208442 | 0.006914 | 0.13   | 7  | 1.14E+08 | 0.0015 | 1.91E-09 |
| rs2131167 | A | G | A | G | 0.008   | -0.00108739  | 0.4458 | 0.212296 | 12 | 99239411  | 0.008388 | 0.9    | 12 | 99633189 | 0.0014 | 1.52E-08 |
| rs214626  | A | G | A | G | 0.0101  | -0.00593239  | 0.1894 | 0.42243  | 9  | 132843197 | 0.006924 | 0.39   | 9  | 1.36E+08 | 0.0018 | 1.58E-08 |
| rs2160514 | A | C | A | C | -0.0094 | 0.00757645   | 0.5548 | 0.655139 | 12 | 16603574  | 0.007191 | 0.29   | 12 | 16756508 | 0.0014 | 2.54E-11 |
| rs2179152 | T | C | T | C | -0.0131 | -0.00265261  | 0.3673 | 0.132565 | 6  | 26325660  | 0.009823 | 0.79   | 6  | 26325888 | 0.0015 | 1.68E-19 |
| rs2183271 | T | C | T | C | 0.0084  | 0.00844827   | 0.6364 | 0.919549 | 10 | 21668300  | 0.01189  | 0.48   | 10 | 21957229 | 0.0015 | 1.91E-08 |
| rs2196281 | A | G | A | G | 0.0172  | 0.0117337    | 0.0884 | 0.982469 | 5  | 59907581  | 0.025678 | 0.65   | 5  | 59152140 | 0.0025 | 3.63E-12 |
| rs2199409 | T | C | T | C | 0.0103  | 0.00385287   | 0.7962 | 0.805956 | 11 | 39893684  | 0.008649 | 0.66   | 11 | 39915234 | 0.0017 | 3.14E-09 |
| rs2216144 | T | C | T | C | 0.0098  | -0.00342483  | 0.5306 | 0.527618 | 12 | 97272700  | 0.006791 | 0.61   | 12 | 97666478 | 0.0014 | 2.58E-12 |
| rs2220926 | T | C | T | C | -0.0095 | -0.0025349   | 0.4308 | 0.500961 | 18 | 61276153  | 0.006817 | 0.71   | 18 | 58943386 | 0.0014 | 1.84E-11 |
| rs2250660 | C | G | C | G | 0.008   | 0.00852945   | 0.5009 | 0.209414 | 2  | 232887841 | 0.008507 | 0.32   | 2  | 2.34E+08 | 0.0014 | 1.20E-08 |
| rs2252098 | T | C | T | C | -0.0077 | 0.00520944   | 0.4703 | 0.130644 | 20 | 53003762  | 0.0103   | 0.61   | 20 | 51620301 | 0.0014 | 4.74E-08 |
| rs2254681 | A | G | A | G | 0.0101  | 0.00377832   | 0.2517 | 0.219741 | 1  | 159278258 | 0.008266 | 0.65   | 1  | 1.59E+08 | 0.0016 | 4.25E-10 |
| rs2276209 | A | C | A | C | 0.0085  | 0.00601332   | 0.704  | 0.470221 | 18 | 39362493  | 0.006745 | 0.37   | 18 | 36942457 | 0.0015 | 3.49E-08 |
| rs2283076 | A | G | A | G | 0.0115  | -0.0152559   | 0.7786 | 0.9378   | 7  | 126838136 | 0.014098 | 0.28   | 7  | 1.26E+08 | 0.0017 | 1.05E-11 |
| rs2287838 | A | G | A | G | -0.0104 | -0.0112402   | 0.5504 | 0.285783 | 19 | 9848338   | 0.007506 | 0.13   | 19 | 9959014  | 0.0014 | 1.27E-13 |
| rs2290601 | T | C | T | C | -0.0149 | 0.0121793    | 0.772  | 0.5622   | 3  | 108393913 | 0.00681  | 0.074  | 3  | 1.08E+08 | 0.0017 | 4.49E-09 |
| rs2297293 | C | G | C | G | 0.0099  | 0.00192913   | 0.3141 | 0.630644 | 21 | 45705132  | 0.006985 | 0.78   | 21 | 47125046 | 0.0015 | 8.80E-11 |
| rs2299156 | T | C | T | C | 0.0099  | -0.00480356  | 0.189  | 0.299472 | 7  | 50696707  | 0.007229 | 0.51   | 7  | 50764404 | 0.0018 | 3.15E-08 |
| rs2314338 | T | C | T | C | 0.0093  | -0.023702    | 0.7304 | 0.705091 | 17 | 40188233  | 0.007529 | 0.0016 | 17 | 38344485 | 0.0016 | 9.50E-09 |
| rs2321157 | A | G | A | G | -0.0081 | -0.000764358 | 0.5303 | 0.279059 | 13 | 58162767  | 0.007602 | 0.92   | 13 | 58736901 | 0.0014 | 7.64E-09 |
| rs232496  | T | C | T | C | 0.009   | -0.00463115  | 0.3657 | 0.39049  | 21 | 21362089  | 0.007021 | 0.51   | 21 | 22734409 | 0.0015 | 7.14E-10 |
| rs2332179 | A | G | A | G | 0.0121  | 0.0225624    | 0.861  | 0.946686 | 3  | 122360583 | 0.015064 | 0.13   | 3  | 1.22E+08 | 0.002  | 2.76E-09 |
| rs2358628 | A | C | A | C | -0.0091 | -0.00805781  | 0.3122 | 0.804035 | 14 | 74165054  | 0.008606 | 0.35   | 14 | 74631757 | 0.0015 | 1.78E-09 |
| rs236318  | C | G | C | G | -0.0102 | -0.0101308   | 0.2346 | 0.355427 | 1  | 93584664  | 0.007165 | 0.16   | 1  | 94050221 | 0.0017 | 4.90E-10 |
| rs2364544 | A | G | A | G | -0.0105 | 0.00590633   | 0.3912 | 0.337176 | 1  | 41367490  | 0.007166 | 0.41   | 1  | 41833162 | 0.0014 | 2.91E-13 |
| rs2365376 | A | C | A | C | 0.0092  | 0.00116263   | 0.3503 | 0.253842 | 5  | 89444506  | 0.007785 | 0.88   | 5  | 88740323 | 0.0015 | 3.93E-10 |
| rs2368831 | T | C | T | C | -0.0092 | 0.0071802    | 0.5736 | 0.216138 | 12 | 79119     | 0.008273 | 0.39   | 12 | 188285   | 0.0014 | 1.63E-10 |
| rs2373124 | A | G | A | G | -0.0096 | -0.0061181   | 0.7604 | 0.950288 | 7  | 86200956  | 0.015879 | 0.7    | 7  | 85830272 | 0.0016 | 4.35E-09 |
| rs2406253 | A | G | A | G | 0.0135  | -0.00883364  | 0.8053 | 0.955572 | 7  | 100479650 | 0.016764 | 0.6    | 7  | 1E+08    | 0.0018 | 3.58E-14 |
| rs2414072 | A | T | A | T | -0.0083 | -0.0167823   | 0.4443 | 0.476465 | 15 | 50558365  | 0.006688 | 0.012  | 15 | 50850562 | 0.0014 | 4.45E-09 |
| rs2416214 | A | C | A | C | 0.0079  | 0.00679689   | 0.4367 | 0.565082 | 5  | 109607784 | 0.006831 | 0.32   | 5  | 1.09E+08 | 0.0014 | 2.09E-08 |
| rs2416759 | A | G | A | G | -0.0093 | -0.0154234   | 0.6986 | 0.595101 | 9  | 120595984 | 0.006948 | 0.026  | 9  | 1.23E+08 | 0.0015 | 1.45E-09 |
| rs2416845 | T | C | T | C | 0.0263  | -0.0300655   | 0.9775 | 0.96878  | 9  | 121993153 | 0.019733 | 0.13   | 9  | 1.25E+08 | 0.0048 | 4.19E-08 |
| rs2436760 | T | C | T | C | 0.0232  | -0.00877094  | 0.9717 | 0.947887 | 6  | 40406549  | 0.015518 | 0.57   | 6  | 40374288 | 0.0042 | 4.52E-08 |
| rs2447097 | T | G | T | G | 0.0096  | 0.0134162    | 0.4596 | 0.269693 | 17 | 2374770   | 0.007702 | 0.082  | 17 | 2278064  | 0.0014 | 1.10E-11 |
| rs2458370 | T | C | T | C | -0.0086 | 0.00525019   | 0.6409 | 0.557397 | 1  | 117332322 | 0.006844 | 0.44   | 1  | 1.18E+08 | 0.0015 | 4.23E-09 |
| rs2469226 | A | T | A | T | 0.0096  | 0.00742318   | 0.2228 | 0.169308 | 15 | 76954649  | 0.009077 | 0.41   | 15 | 77246990 | 0.0017 | 1.28E-08 |
| rs2470966 | C | G | C | G | -0.0103 | -0.00343262  | 0.6998 | 0.895533 | 7  | 104790442 | 0.010564 | 0.75   | 7  | 1.04E+08 | 0.0015 | 1.62E-11 |
| rs2517086 | C | G | C | G | -0.0088 | -0.00111584  | 0.5721 | 0.164025 | 8  | 17184907  | 0.009318 | 0.9    | 8  | 17042416 | 0.0014 | 8.00E-10 |
| rs2521602 | A | G | A | G | -0.0266 | -0.01832     | 0.0219 | 0.043948 | 17 | 44259056  | 0.016927 | 0.28   | 17 | 42336424 | 0.0049 | 4.17E-08 |
| rs2529069 | T | C | T | C | -0.0106 | -0.00626616  | 0.7343 | 0.284822 | 7  | 24531419  | 0.007602 | 0.41   | 7  | 24571038 | 0.0016 | 2.66E-11 |
| rs2542673 | A | C | A | C | 0.0088  | 0.0149123    | 0.3243 | 0.358549 | 16 | 54172803  | 0.007112 | 0.036  | 16 | 54206715 | 0.0015 | 6.30E-09 |
| rs2545795 | A | C | A | C | 0.0125  | 0.00139123   | 0.4437 | 0.75048  | 5  | 177460105 | 0.007901 | 0.86   | 5  | 1.77E+08 | 0.0014 | 1.03E-18 |
| rs255053  | A | G | A | G | -0.0111 | -0.0175661   | 0.1913 | 0.112632 | 16 | 67986589  | 0.010657 | 0.099  | 16 | 68020492 | 0.0018 | 6.68E-10 |
| rs2569041 | T | C | T | C | 0.0077  | 0.0031939    | 0.5421 | 0.12464  | 5  | 168083352 | 0.010129 | 0.75   | 5  | 1.68E+08 | 0.0014 | 4.85E-08 |
| rs2570497 | T | C | T | C | -0.0121 | -0.0038705   | 0.6367 | 0.603746 | 2  | 103825088 | 0.006945 | 0.58   | 2  | 1.04E+08 | 0.0015 | 1.27E-16 |
| rs2665668 | A | G | A | G | -0.0094 | -0.0118639   | 0.6413 | 0.754563 | 2  | 60541843  | 0.007897 | 0.13   | 2  | 60768978 | 0.0015 | 1.25E-10 |
| rs2718277 | T | C | T | C | 0.0142  | 0.0106636    | 0.0832 | 0.041066 | 7  | 74719610  | 0.017237 | 0.54   | 7  | 74133929 | 0.0026 | 2.99E-08 |
| rs2718791 | T | C | T | C | -0.0081 | 0.00101074   | 0.6452 | 0.814121 | 3  | 181213607 | 0.00868  | 0.91   | 3  | 1.81E+08 | 0.0015 | 4.02E-08 |
| rs27220   | A | G | A | G | -0.0114 | 0.00275097   | 0.3562 | 0.611912 | 5  | 60479309  | 0.00693  | 0.69   | 5  | 59775136 | 0.0015 | 7.52E-15 |
| rs2725370 | T | C | T | C | -0.0141 | 0.00840556   | 0.3017 | 0.066523 | 8  | 30995310  | 0.012631 | 0.51   | 8  | 30852826 | 0.0015 | 4.96E-20 |
| rs2736752 | T | G | T | G | 0.0095  | -0.0111309   | 0.7869 | 0.987032 | 3  | 60831661  | 0.028926 | 0.7    | 3  | 60817322 | 0.0017 | 3.24E-08 |
| rs2740795 | A | T | A | T | 0.0098  | -0.00322093  | 0.7377 | 0.43684  | 8  | 90915227  | 0.006818 | 0.64   | 8  | 91927455 | 0.0016 | 7.71E-10 |

|            |   |   |   |   |         |              |        |          |    |           |          |        |    |          |        |          |
|------------|---|---|---|---|---------|--------------|--------|----------|----|-----------|----------|--------|----|----------|--------|----------|
| rs2761438  | A | G | A | G | 0.0098  | 0.00339898   | 0.3807 | 0.683477 | 1  | 110209517 | 0.007478 | 0.65   | 1  | 1.11E+08 | 0.0015 | 1.59E-11 |
| rs2764684  | T | C | T | C | 0.0143  | -0.0696713   | 0.8266 | 0.992795 | 1  | 58072247  | 0.040705 | 0.087  | 1  | 58537919 | 0.0019 | 9.99E-15 |
| rs2805064  | C | G | C | G | 0.0093  | -0.023831    | 0.7291 | 0.821806 | 9  | 24530617  | 0.008909 | 0.0075 | 9  | 24530615 | 0.0016 | 3.54E-09 |
| rs28482086 | A | G | A | G | 0.0086  | 0.00726473   | 0.3494 | 0.226705 | 1  | 74760568  | 0.00809  | 0.37   | 1  | 75226252 | 0.0015 | 4.51E-09 |
| rs28505285 | C | G | C | G | 0.0106  | 0.0207368    | 0.1884 | 0.012248 | 7  | 44338055  | 0.030205 | 0.49   | 7  | 44377654 | 0.0018 | 3.50E-09 |
| rs28513882 | A | G | A | G | -0.011  | -0.0249142   | 0.1783 | 0.005283 | 3  | 107577781 | 0.045421 | 0.58   | 3  | 1.07E+08 | 0.0018 | 2.03E-09 |
| rs2852349  | T | C | T | C | -0.0093 | 0.00115056   | 0.5278 | 0.579011 | 18 | 39602943  | 0.006943 | 0.87   | 18 | 37182907 | 0.0014 | 3.78E-11 |
| rs28540013 | A | G | A | G | -0.0213 | -0.0682346   | 0.0614 | 0.005043 | 8  | 142215968 | 0.048539 | 0.16   | 8  | 1.43E+08 | 0.0029 | 3.62E-13 |
| rs28587776 | T | C | T | C | 0.0088  | -0.00637683  | 0.3541 | 0.278578 | 5  | 177603176 | 0.007481 | 0.39   | 5  | 1.77E+08 | 0.0015 | 2.55E-09 |
| rs28669886 | A | G | A | G | -0.0084 | 0.0179111    | 0.3548 | 0.087656 | 12 | 106328923 | 0.011447 | 0.12   | 12 | 1.07E+08 | 0.0015 | 8.31E-09 |
| rs2885198  | A | G | A | G | 0.0088  | 0.00116395   | 0.5318 | 0.438761 | 3  | 143917579 | 0.006688 | 0.86   | 3  | 1.44E+08 | 0.0014 | 4.63E-10 |
| rs2898191  | A | C | A | C | 0.0093  | -0.00504735  | 0.6921 | 0.788425 | 21 | 32916201  | 0.00827  | 0.54   | 21 | 34288509 | 0.0015 | 1.88E-09 |
| rs2910823  | T | G | T | G | 0.0115  | 0.00725599   | 0.5359 | 0.147935 | 5  | 60202348  | 0.009592 | 0.45   | 5  | 59498175 | 0.0014 | 2.50E-16 |
| rs2916490  | A | G | A | G | -0.0092 | 0.00277642   | 0.3023 | 0.354467 | 2  | 79965226  | 0.007129 | 0.7    | 2  | 80192352 | 0.0015 | 1.92E-09 |
| rs2923424  | A | G | A | G | 0.012   | 0.0100524    | 0.6069 | 0.549952 | 8  | 42527081  | 0.006905 | 0.15   | 8  | 42382222 | 0.0014 | 6.31E-17 |
| rs2929032  | A | G | A | G | -0.0081 | 0.00350606   | 0.4654 | 0.456052 | 8  | 55459185  | 0.006674 | 0.6    | 8  | 56371745 | 0.0014 | 8.40E-09 |
| rs2929860  | T | C | T | C | 0.011   | -0.0244456   | 0.1878 | 0.045869 | 3  | 128973098 | 0.016277 | 0.13   | 3  | 1.29E+08 | 0.0018 | 1.33E-09 |
| rs2942884  | A | G | A | G | -0.009  | -0.00110744  | 0.4639 | 0.696446 | 2  | 100707116 | 0.007394 | 0.88   | 2  | 1.01E+08 | 0.0014 | 2.27E-10 |
| rs2954114  | A | C | A | C | -0.0081 | 0.0044244    | 0.468  | 0.558117 | 12 | 121731978 | 0.006952 | 0.52   | 12 | 1.22E+08 | 0.0014 | 9.40E-09 |
| rs2958182  | A | T | A | T | 0.0082  | 0.00336498   | 0.3414 | 0.165226 | 18 | 55481790  | 0.009336 | 0.72   | 18 | 53149021 | 0.0015 | 3.46E-08 |
| rs2962378  | A | G | A | G | 0.0101  | 0.00341697   | 0.7872 | 0.6244   | 5  | 91654393  | 0.007016 | 0.63   | 5  | 90950210 | 0.0017 | 4.30E-09 |
| rs2964255  | A | G | A | G | 0.0088  | 0.00378292   | 0.3066 | 0.612152 | 5  | 152672772 | 0.006942 | 0.59   | 5  | 1.52E+08 | 0.0015 | 6.34E-09 |
| rs2977464  | T | C | T | C | 0.0102  | -0.00773025  | 0.1869 | 0.318444 | 8  | 140535094 | 0.007379 | 0.29   | 8  | 1.42E+08 | 0.0018 | 1.46E-08 |
| rs2980813  | A | T | A | T | 0.0088  | -0.00101002  | 0.4692 | 0.448367 | 8  | 40192491  | 0.00682  | 0.88   | 8  | 40050010 | 0.0014 | 4.28E-10 |
| rs2989476  | C | G | C | G | 0.0078  | 0.00049478   | 0.4193 | 0.644573 | 1  | 60593587  | 0.00728  | 0.95   | 1  | 61059259 | 0.0014 | 3.73E-08 |
| rs2994326  | T | C | T | C | -0.01   | 0.00580575   | 0.1852 | 0.125841 | 1  | 243487724 | 0.010023 | 0.56   | 1  | 2.44E+08 | 0.0018 | 3.38E-08 |
| rs2998299  | T | G | T | G | -0.0136 | -0.0112419   | 0.2137 | 0.242555 | 14 | 84531019  | 0.008104 | 0.17   | 14 | 84997363 | 0.0017 | 1.51E-15 |
| rs3128341  | T | C | T | C | -0.0165 | 0.00122986   | 0.2481 | 0.092699 | 1  | 72284165  | 0.011454 | 0.91   | 1  | 72762169 | 0.0016 | 2.51E-24 |
| rs312927   | A | G | A | G | -0.0147 | 0.00325349   | 0.1203 | 0.024976 | 19 | 3274772   | 0.020865 | 0.88   | 19 | 3274770  | 0.0022 | 2.52E-11 |
| rs322614   | A | G | A | G | -0.0087 | 0.00707466   | 0.3817 | 0.473583 | 11 | 29734000  | 0.006841 | 0.3    | 11 | 29755547 | 0.0014 | 1.43E-09 |
| rs322744   | T | C | T | C | -0.009  | 0.00240072   | 0.2609 | 0.362632 | 7  | 128140349 | 0.006998 | 0.73   | 7  | 1.28E+08 | 0.0016 | 2.04E-08 |
| rs324885   | A | C | A | C | 0.0142  | 0.00385056   | 0.5257 | 0.708934 | 5  | 88601453  | 0.007442 | 0.6    | 5  | 87897271 | 0.0014 | 4.11E-24 |
| rs32940    | T | C | T | C | -0.0096 | -0.00458109  | 0.3001 | 0.299232 | 5  | 141752719 | 0.007507 | 0.54   | 5  | 1.41E+08 | 0.0015 | 3.72E-10 |
| rs34098770 | A | G | A | G | -0.016  | 0.000278747  | 0.152  | 0.21806  | 16 | 12143955  | 0.008374 | 0.97   | 16 | 12237812 | 0.002  | 2.95E-16 |
| rs34155847 | A | G | A | G | 0.0135  | 0.00158322   | 0.2483 | 0.363112 | 4  | 3250403   | 0.007146 | 0.82   | 4  | 3252130  | 0.0016 | 1.43E-16 |
| rs34262657 | T | G | T | G | -0.024  | -0.000257385 | 0.9619 | 0.500961 | 15 | 63557088  | 0.006553 | 0.97   | 15 | 63849287 | 0.0038 | 2.84E-10 |
| rs34286836 | T | C | T | C | -0.0089 | -0.00114532  | 0.4479 | 0.409462 | 6  | 147952528 | 0.007146 | 0.87   | 6  | 1.48E+08 | 0.0014 | 3.44E-10 |
| rs34298584 | A | G | A | G | 0.0111  | 0.000615213  | 0.1688 | 0.043228 | 18 | 41446731  | 0.016666 | 0.97   | 18 | 39026695 | 0.0019 | 3.67E-09 |
| rs34305371 | A | G | A | G | 0.0314  | -0.045108    | 0.0985 | 0.006244 | 1  | 72267927  | 0.043688 | 0.3    | 1  | 72733610 | 0.0024 | 1.10E-39 |
| rs34309    | A | G | A | G | 0.008   | -0.000782364 | 0.3816 | 0.339577 | 5  | 68268555  | 0.007206 | 0.91   | 5  | 67564383 | 0.0014 | 2.94E-08 |
| rs34316274 | A | G | A | G | 0.0097  | 0.00860794   | 0.762  | 0.675552 | 16 | 968697    | 0.007467 | 0.25   | 16 | 1018697  | 0.0017 | 3.86E-09 |
| rs34363861 | A | G | A | G | 0.0087  | 0.00682246   | 0.5194 | 0.659222 | 2  | 73263284  | 0.007029 | 0.33   | 2  | 73490412 | 0.0014 | 8.69E-10 |
| rs34394051 | A | G | A | G | -0.0117 | 0.000417462  | 0.8429 | 0.746158 | 1  | 6793031   | 0.007816 | 0.96   | 1  | 6853091  | 0.002  | 2.30E-09 |
| rs34410    | C | G | C | G | -0.0083 | -0.00582368  | 0.4628 | 0.228146 | 5  | 108133983 | 0.008005 | 0.47   | 5  | 1.07E+08 | 0.0014 | 3.86E-09 |
| rs34485537 | A | G | A | G | 0.011   | 0.014879     | 0.4113 | 0.536503 | 16 | 83575319  | 0.006748 | 0.027  | 16 | 83608599 | 0.0014 | 1.13E-14 |
| rs34624793 | T | C | T | C | 0.0116  | -0.0252213   | 0.8636 | 0.989433 | 2  | 144159237 | 0.032263 | 0.43   | 2  | 1.45E+08 | 0.0021 | 1.94E-08 |
| rs34720381 | T | C | T | C | -0.018  | 0.0240461    | 0.0907 | 0.084054 | 1  | 171486183 | 0.012315 | 0.051  | 1  | 1.71E+08 | 0.0024 | 1.90E-13 |
| rs347661   | T | C | T | C | -0.0081 | 0.0192021    | 0.4347 | 0.836936 | 5  | 63253314  | 0.008955 | 0.032  | 5  | 62549141 | 0.0014 | 1.58E-08 |
| rs34807077 | A | C | A | C | 0.0128  | -0.00161553  | 0.1569 | 0.415946 | 8  | 28823252  | 0.006794 | 0.81   | 8  | 28680769 | 0.0019 | 3.29E-11 |
| rs34967082 | A | G | A | G | -0.008  | -0.0115667   | 0.4161 | 0.28074  | 2  | 214517930 | 0.007455 | 0.12   | 2  | 2.15E+08 | 0.0014 | 1.77E-08 |
| rs35016816 | T | C | T | C | 0.0176  | 0.023379     | 0.899  | 0.940922 | 16 | 10172258  | 0.014325 | 0.1    | 16 | 10266115 | 0.0023 | 3.56E-14 |
| rs35104491 | A | G | A | G | 0.0124  | -0.00348283  | 0.1849 | 0.172671 | 6  | 96942587  | 0.008966 | 0.7    | 6  | 97390463 | 0.0018 | 6.81E-12 |
| rs35319653 | T | C | T | C | 0.0119  | 0.00260565   | 0.3433 | 0.270893 | 4  | 139982001 | 0.007677 | 0.73   | 4  | 1.41E+08 | 0.0015 | 8.01E-16 |
| rs35417702 | T | C | T | C | -0.0152 | -0.0162898   | 0.5235 | 0.579491 | 7  | 72274931  | 0.007017 | 0.02   | 7  | 71739916 | 0.0014 | 2.40E-27 |
| rs35493937 | C | G | C | G | 0.0124  | 0.00865998   | 0.2305 | 0.080932 | 2  | 65344005  | 0.01233  | 0.48   | 2  | 65571139 | 0.0017 | 9.73E-14 |

|            |   |   |   |   |         |              |        |          |    |           |          |        |    |          |        |          |
|------------|---|---|---|---|---------|--------------|--------|----------|----|-----------|----------|--------|----|----------|--------|----------|
| rs355579   | A | G | A | G | 0.0236  | -0.000975262 | 0.9346 | 0.008646 | 2  | 141621829 | 0.037199 | 0.98   | 2  | 1.42E+08 | 0.0028 | 7.71E-17 |
| rs35606437 | A | G | A | G | 0.0105  | 0.0105132    | 0.2675 | 0.240154 | 8  | 92315304  | 0.00797  | 0.19   | 8  | 93327532 | 0.0016 | 3.98E-11 |
| rs356999   | A | G | A | G | -0.0101 | -0.00743428  | 0.3802 | 0.110951 | 2  | 60584449  | 0.010911 | 0.5    | 2  | 60811584 | 0.0014 | 2.91E-12 |
| rs35745455 | A | G | A | G | 0.008   | 0.00204286   | 0.501  | 0.871518 | 7  | 5784466   | 0.009641 | 0.83   | 7  | 5824100  | 0.0014 | 1.43E-08 |
| rs35754740 | T | C | T | C | 0.0083  | 0.00367297   | 0.5811 | 0.408982 | 16 | 63093966  | 0.006909 | 0.6    | 16 | 63127870 | 0.0014 | 4.77E-09 |
| rs35929923 | A | G | A | G | -0.0114 | -0.00806418  | 0.2495 | 0.173631 | 7  | 21360907  | 0.008886 | 0.36   | 7  | 21400525 | 0.0016 | 1.77E-12 |
| rs36085856 | C | G | C | G | 0.0201  | -0.0120801   | 0.0734 | 0.106868 | 15 | 70086897  | 0.010903 | 0.27   | 15 | 70379236 | 0.0036 | 1.52E-08 |
| rs36120534 | T | C | T | C | 0.01    | -0.012289    | 0.1811 | 0.028578 | 20 | 17457476  | 0.019882 | 0.54   | 20 | 17438121 | 0.0018 | 3.77E-08 |
| rs363096   | T | C | T | C | -0.0143 | -0.00560815  | 0.4245 | 0.592939 | 4  | 3178294   | 0.007032 | 0.43   | 4  | 3180021  | 0.0014 | 5.77E-24 |
| rs3735478  | T | G | T | G | 0.0108  | 0.0120199    | 0.2932 | 0.145533 | 7  | 44760577  | 0.009774 | 0.22   | 7  | 44800176 | 0.0016 | 3.66E-12 |
| rs3768480  | C | G | C | G | 0.0101  | -0.00659346  | 0.4523 | 0.197887 | 1  | 109988373 | 0.008563 | 0.44   | 1  | 1.11E+08 | 0.0014 | 8.40E-13 |
| rs3778995  | T | C | T | C | 0.0191  | -0.00541149  | 0.0683 | 0.816042 | 7  | 2136236   | 0.008918 | 0.54   | 7  | 2190385  | 0.0028 | 7.32E-12 |
| rs3781339  | T | C | T | C | -0.0104 | 0.00331932   | 0.1962 | 0.237992 | 10 | 103668394 | 0.008128 | 0.68   | 10 | 1.05E+08 | 0.0018 | 7.55E-09 |
| rs3790609  | T | C | T | C | 0.0107  | -0.00711733  | 0.1744 | 0.135207 | 1  | 112514368 | 0.010092 | 0.48   | 1  | 1.13E+08 | 0.0019 | 8.35E-09 |
| rs3809169  | T | C | T | C | 0.014   | 0.00588327   | 0.9128 | 0.957493 | 12 | 113473727 | 0.016895 | 0.73   | 12 | 1.14E+08 | 0.0025 | 3.85E-08 |
| rs3809634  | A | G | A | G | -0.0109 | 0.0140248    | 0.6842 | 0.924832 | 16 | 53504245  | 0.012925 | 0.28   | 16 | 53538157 | 0.0015 | 6.82E-13 |
| rs3812281  | T | C | T | C | 0.0113  | -0.00514099  | 0.6016 | 0.726225 | 7  | 135397999 | 0.007494 | 0.49   | 7  | 1.35E+08 | 0.0014 | 2.70E-15 |
| rs3817923  | A | G | A | G | -0.0121 | -0.00581669  | 0.1133 | 0.041547 | 1  | 171840071 | 0.016047 | 0.72   | 1  | 1.72E+08 | 0.0022 | 4.17E-08 |
| rs382196   | T | G | T | G | -0.0082 | -0.00485142  | 0.3814 | 0.345341 | 3  | 9103870   | 0.007296 | 0.51   | 3  | 9145554  | 0.0014 | 1.47E-08 |
| rs3847228  | T | C | T | C | 0.0083  | 0.0119037    | 0.406  | 0.202209 | 9  | 1798805   | 0.008647 | 0.17   | 9  | 1798805  | 0.0014 | 7.47E-09 |
| rs3895736  | A | C | A | C | 0.0144  | 7.31E-06     | 0.1728 | 0.051153 | 3  | 48621034  | 0.015243 | 1      | 3  | 48658467 | 0.0019 | 9.92E-15 |
| rs3897821  | A | G | A | G | 0.0154  | 0.00271379   | 0.6654 | 0.737512 | 1  | 243257086 | 0.007656 | 0.72   | 1  | 2.43E+08 | 0.0015 | 3.58E-25 |
| rs399821   | A | G | A | G | -0.0078 | -0.000462121 | 0.5321 | 0.473103 | 3  | 21458832  | 0.006859 | 0.95   | 3  | 21500324 | 0.0014 | 2.34E-08 |
| rs39998    | A | C | A | C | 0.009   | 0.0299212    | 0.2967 | 0.130403 | 16 | 28121831  | 0.010238 | 0.0035 | 16 | 28133152 | 0.0015 | 5.02E-09 |
| rs4127499  | A | G | A | G | 0.0087  | 0.0176106    | 0.3495 | 0.059558 | 11 | 122305675 | 0.013985 | 0.21   | 11 | 1.22E+08 | 0.0015 | 3.56E-09 |
| rs42302    | A | G | A | G | 0.0086  | -0.00323378  | 0.3441 | 0.626081 | 5  | 75669729  | 0.00708  | 0.65   | 5  | 74965554 | 0.0015 | 5.96E-09 |
| rs4255791  | A | G | A | G | -0.0084 | 0.00824193   | 0.3301 | 0.09342  | 16 | 28263483  | 0.011792 | 0.48   | 16 | 28274804 | 0.0015 | 2.51E-08 |
| rs4257287  | T | C | T | C | 0.0143  | 0.00741756   | 0.0973 | 0.988233 | 18 | 55076600  | 0.031405 | 0.81   | 18 | 52737309 | 0.0024 | 1.52E-09 |
| rs4263475  | A | G | A | G | 0.0078  | -0.00329247  | 0.5814 | 0.643852 | 5  | 26774033  | 0.007063 | 0.64   | 5  | 26774142 | 0.0014 | 4.40E-08 |
| rs4298514  | T | C | T | C | 0.0104  | -0.0100819   | 0.6986 | 0.536023 | 8  | 117920648 | 0.00684  | 0.14   | 8  | 1.19E+08 | 0.0015 | 1.07E-11 |
| rs4328757  | T | C | T | C | 0.0096  | -0.00251151  | 0.6119 | 0.612632 | 3  | 36896689  | 0.006999 | 0.72   | 3  | 36938180 | 0.0014 | 2.95E-11 |
| rs4352658  | T | C | T | C | -0.019  | -0.00622944  | 0.081  | 0.110471 | 6  | 87570154  | 0.010727 | 0.56   | 6  | 88279872 | 0.0026 | 1.71E-13 |
| rs4358081  | A | C | A | C | -0.0095 | 0.00835317   | 0.5285 | 0.245437 | 2  | 28877776  | 0.007761 | 0.28   | 2  | 29100642 | 0.0014 | 1.28E-11 |
| rs4369924  | A | G | A | G | 0.0125  | 0.00934735   | 0.1615 | 0.302113 | 20 | 43325743  | 0.007488 | 0.21   | 20 | 41954383 | 0.0019 | 5.58E-11 |
| rs4384309  | A | G | A | G | 0.0102  | -0.0102471   | 0.4641 | 0.536984 | 10 | 131312333 | 0.006775 | 0.13   | 10 | 1.33E+08 | 0.0014 | 4.89E-13 |
| rs4396896  | A | T | A | T | -0.0107 | 0.000370249  | 0.3916 | 0.558357 | 3  | 86212650  | 0.006899 | 0.96   | 3  | 86261800 | 0.0014 | 1.12E-13 |
| rs4423373  | A | G | A | G | -0.0087 | -0.00416205  | 0.5386 | 0.114313 | 15 | 27743194  | 0.010733 | 0.7    | 15 | 27988340 | 0.0014 | 6.00E-10 |
| rs4426420  | T | C | T | C | -0.014  | 0.000887204  | 0.16   | 0.126321 | 18 | 37524423  | 0.010446 | 0.93   | 18 | 35104386 | 0.0019 | 2.63E-13 |
| rs4434676  | A | T | A | T | -0.0089 | 0.00534574   | 0.4292 | 0.158501 | 9  | 70417560  | 0.009391 | 0.57   | 9  | 73032476 | 0.0014 | 2.83E-10 |
| rs4458044  | C | G | C | G | 0.0101  | -0.0173141   | 0.2581 | 0.279299 | 17 | 45796361  | 0.007655 | 0.024  | 17 | 43873727 | 0.0016 | 5.71E-10 |
| rs4469771  | T | C | T | C | 0.0101  | -0.00677025  | 0.6802 | 0.670989 | 10 | 66432956  | 0.007344 | 0.36   | 10 | 68192714 | 0.0015 | 1.88E-11 |
| rs4497562  | A | G | A | G | 0.0112  | 0.000774222  | 0.7295 | 0.814601 | 13 | 62038471  | 0.008803 | 0.93   | 13 | 62612604 | 0.0016 | 1.05E-12 |
| rs4500930  | T | C | T | C | -0.0109 | 0.0104814    | 0.3449 | 0.478386 | 2  | 228120789 | 0.00683  | 0.12   | 2  | 2.29E+08 | 0.0015 | 1.67E-13 |
| rs4500960  | T | C | T | C | -0.0131 | 0.010344     | 0.4647 | 0.429395 | 2  | 161962111 | 0.006769 | 0.13   | 2  | 1.63E+08 | 0.0014 | 1.04E-20 |
| rs4502401  | T | C | T | C | 0.0085  | 0.00800619   | 0.6542 | 0.270893 | 2  | 198458802 | 0.007364 | 0.28   | 2  | 1.99E+08 | 0.0015 | 7.55E-09 |
| rs4652135  | A | C | A | C | 0.0103  | -0.00374441  | 0.7201 | 0.572046 | 1  | 175868537 | 0.006792 | 0.58   | 1  | 1.76E+08 | 0.0016 | 4.35E-11 |
| rs4658019  | T | C | T | C | 0.0084  | 0.00501367   | 0.4531 | 0.48463  | 1  | 196180806 | 0.006798 | 0.46   | 1  | 1.96E+08 | 0.0014 | 2.19E-09 |
| rs4664983  | T | C | T | C | -0.0103 | 0.0109988    | 0.1987 | 0.193564 | 2  | 158597926 | 0.008651 | 0.2    | 2  | 1.59E+08 | 0.0018 | 4.11E-09 |
| rs4673840  | T | C | T | C | -0.0138 | -0.00336597  | 0.842  | 0.723583 | 2  | 214498517 | 0.00766  | 0.66   | 2  | 2.15E+08 | 0.0019 | 5.86E-13 |
| rs4675248  | A | G | A | G | -0.0094 | -0.000698721 | 0.3995 | 0.323727 | 2  | 202015507 | 0.007445 | 0.93   | 2  | 2.03E+08 | 0.0014 | 4.50E-11 |
| rs4691601  | A | T | A | T | -0.0115 | -0.00266302  | 0.4571 | 0.318924 | 4  | 159678189 | 0.00724  | 0.71   | 4  | 1.61E+08 | 0.0014 | 2.46E-16 |
| rs4705763  | C | G | C | G | 0.0089  | 0.00618936   | 0.5358 | 0.623199 | 5  | 113058806 | 0.007139 | 0.39   | 5  | 1.12E+08 | 0.0014 | 2.08E-10 |
| rs4712371  | A | G | A | G | -0.0124 | -0.00123039  | 0.1217 | 0.152978 | 6  | 19227436  | 0.009436 | 0.9    | 6  | 19227667 | 0.0021 | 6.63E-09 |
| rs4719460  | T | C | T | C | -0.0088 | 0.00416586   | 0.656  | 0.649616 | 7  | 819973    | 0.007203 | 0.56   | 7  | 859610   | 0.0015 | 2.34E-09 |
| rs4724083  | T | C | T | C | 0.0083  | 0.00593769   | 0.3227 | 0.743036 | 7  | 41967473  | 0.00757  | 0.43   | 7  | 42007071 | 0.0015 | 3.53E-08 |

|            |   |   |   |   |         |              |        |          |    |           |          |        |    |          |        |          |
|------------|---|---|---|---|---------|--------------|--------|----------|----|-----------|----------|--------|----|----------|--------|----------|
| rs4726070  | A | G | A | G | 0.0122  | 0.0105638    | 0.6021 | 0.274256 | 7  | 151631132 | 0.007657 | 0.17   | 7  | 1.51E+08 | 0.0014 | 1.36E-17 |
| rs4730020  | T | C | T | C | 0.009   | 0.00478042   | 0.2697 | 0.104467 | 7  | 104548635 | 0.011236 | 0.67   | 7  | 1.04E+08 | 0.0016 | 1.21E-08 |
| rs4731413  | A | G | A | G | 0.0111  | 0.012455     | 0.2058 | 0.044669 | 7  | 128196079 | 0.016629 | 0.45   | 7  | 1.28E+08 | 0.0017 | 2.31E-10 |
| rs4739235  | A | G | A | G | 0.0109  | 0.00490556   | 0.1701 | 0.349183 | 8  | 21429594  | 0.007199 | 0.5    | 8  | 21287105 | 0.0019 | 5.26E-09 |
| rs4741571  | A | G | A | G | -0.0102 | -0.00105517  | 0.6723 | 0.82877  | 9  | 1667814   | 0.009078 | 0.91   | 9  | 1667814  | 0.0015 | 8.09E-12 |
| rs4778058  | T | C | T | C | -0.0092 | -0.00115277  | 0.4964 | 0.361191 | 15 | 92912839  | 0.007037 | 0.87   | 15 | 93456069 | 0.0014 | 4.92E-11 |
| rs4785187  | A | G | A | G | -0.01   | -0.000247688 | 0.2253 | 0.379923 | 16 | 49732861  | 0.007032 | 0.97   | 16 | 49766772 | 0.0017 | 3.12E-09 |
| rs4787028  | T | C | T | C | 0.0086  | 0.0117823    | 0.6622 | 0.614313 | 16 | 7483019   | 0.006974 | 0.091  | 16 | 7533021  | 0.0015 | 8.08E-09 |
| rs4787457  | A | G | A | G | 0.0162  | 0.0418857    | 0.6339 | 0.948847 | 16 | 28544079  | 0.01553  | 0.007  | 16 | 28555400 | 0.0015 | 1.23E-28 |
| rs4788115  | A | T | A | T | 0.0111  | -0.0332471   | 0.1804 | 0.091979 | 16 | 28986790  | 0.011789 | 0.0048 | 16 | 28998111 | 0.0019 | 2.27E-09 |
| rs479018   | A | G | A | G | 0.0109  | 0.00704167   | 0.3255 | 0.03122  | 11 | 66293075  | 0.018473 | 0.7    | 11 | 66060546 | 0.0015 | 3.10E-13 |
| rs4793090  | A | G | A | G | 0.0084  | -0.00179048  | 0.6635 | 0.590538 | 17 | 42534324  | 0.007022 | 0.8    | 17 | 40686342 | 0.0015 | 1.67E-08 |
| rs481940   | T | C | T | C | 0.01    | -0.00855935  | 0.2546 | 0.045629 | 1  | 70976774  | 0.016285 | 0.6    | 1  | 71442457 | 0.0016 | 4.94E-10 |
| rs482787   | T | C | T | C | 0.01    | 0.00617949   | 0.6749 | 0.756724 | 10 | 98007267  | 0.00796  | 0.44   | 10 | 99767024 | 0.0015 | 1.95E-11 |
| rs4839155  | T | G | T | G | 0.0115  | -0.0046695   | 0.7671 | 0.759846 | 1  | 111618867 | 0.0077   | 0.54   | 1  | 1.12E+08 | 0.0017 | 4.66E-12 |
| rs4846724  | A | G | A | G | 0.0098  | -0.00700497  | 0.5347 | 0.370557 | 1  | 221794475 | 0.007073 | 0.32   | 1  | 2.22E+08 | 0.0014 | 2.89E-12 |
| rs4850954  | T | C | T | C | 0.0077  | 0.00976108   | 0.4628 | 0.805476 | 2  | 100956752 | 0.00817  | 0.23   | 2  | 1.02E+08 | 0.0014 | 3.73E-08 |
| rs4851263  | A | G | A | G | -0.0151 | 0.0115242    | 0.103  | 0.23439  | 2  | 100185405 | 0.007941 | 0.15   | 2  | 1.01E+08 | 0.0023 | 7.86E-11 |
| rs488476   | C | G | C | G | -0.0113 | 0.00712452   | 0.6191 | 0.757925 | 11 | 95810551  | 0.008046 | 0.38   | 11 | 95543715 | 0.0015 | 8.29E-15 |
| rs4894658  | C | G | C | G | 0.0091  | 0.00616978   | 0.2619 | 0.168108 | 3  | 174210946 | 0.008976 | 0.49   | 3  | 1.74E+08 | 0.0016 | 1.34E-08 |
| rs4904523  | A | G | A | G | -0.0082 | 0.00620177   | 0.5208 | 0.579731 | 14 | 89257286  | 0.007067 | 0.38   | 14 | 89723630 | 0.0014 | 6.27E-09 |
| rs4915735  | A | G | A | G | 0.0116  | 0.0120089    | 0.1408 | 0.051393 | 1  | 61342772  | 0.015269 | 0.43   | 1  | 61808444 | 0.002  | 9.56E-09 |
| rs4919624  | A | G | A | G | 0.0193  | 0.00666519   | 0.8022 | 0.75072  | 10 | 102261328 | 0.008015 | 0.41   | 10 | 1.04E+08 | 0.0018 | 6.52E-28 |
| rs4925109  | A | G | A | G | -0.0096 | -0.0227371   | 0.3172 | 0.858549 | 17 | 17758488  | 0.009705 | 0.019  | 17 | 17661802 | 0.0015 | 1.91E-10 |
| rs4938815  | T | G | T | G | 0.0085  | -0.0072484   | 0.7041 | 0.682757 | 11 | 120570938 | 0.007526 | 0.34   | 11 | 1.2E+08  | 0.0015 | 2.99E-08 |
| rs4941735  | T | C | T | C | 0.0092  | -0.0151959   | 0.5703 | 0.79731  | 13 | 31067111  | 0.008659 | 0.079  | 13 | 31641248 | 0.0014 | 8.63E-11 |
| rs4972748  | T | C | T | C | 0.0105  | -0.0170163   | 0.8204 | 0.662104 | 2  | 175233282 | 0.007213 | 0.018  | 2  | 1.76E+08 | 0.0018 | 9.50E-09 |
| rs4977885  | A | G | A | G | -0.0084 | -0.0162198   | 0.3971 | 0.769933 | 9  | 23687985  | 0.008005 | 0.043  | 9  | 23687983 | 0.0014 | 6.78E-09 |
| rs4984541  | A | G | A | G | -0.0138 | 0.00612099   | 0.7666 | 0.541066 | 15 | 96367910  | 0.006751 | 0.36   | 15 | 96911139 | 0.0017 | 3.40E-16 |
| rs4984682  | C | G | C | G | -0.0138 | 0.0025333    | 0.7674 | 0.32853  | 16 | 690404    | 0.007086 | 0.72   | 16 | 740404   | 0.0017 | 1.82E-16 |
| rs503796   | C | G | C | T | -0.026  | -0.0227743   | 0.9775 | 0.005043 | 2  | 44921077  | 0.04864  | 0.64   | 2  | 45157163 | 0.0047 | 4.13E-08 |
| rs548897   | A | G | A | G | 0.0081  | -0.00316377  | 0.45   | 0.367435 | 1  | 57252357  | 0.007048 | 0.65   | 1  | 57718030 | 0.0014 | 1.10E-08 |
| rs55675587 | T | C | T | C | -0.0103 | 0.000377091  | 0.1926 | 0.435399 | 1  | 65759198  | 0.006795 | 0.96   | 1  | 66224881 | 0.0018 | 5.92E-09 |
| rs55736314 | C | G | C | G | -0.0154 | -0.00968519  | 0.599  | 0.975985 | 3  | 71537142  | 0.02203  | 0.66   | 3  | 71586293 | 0.0014 | 4.59E-27 |
| rs56085180 | A | G | A | G | -0.0269 | -0.0309932   | 0.0366 | 0.010567 | 7  | 2103959   | 0.032984 | 0.35   | 7  | 2143594  | 0.0037 | 5.94E-13 |
| rs56099375 | T | C | T | C | 0.012   | -0.000545972 | 0.241  | 0.017531 | 8  | 76460753  | 0.025377 | 0.98   | 8  | 77372988 | 0.0017 | 3.10E-13 |
| rs56171318 | T | C | T | C | -0.0137 | -0.00318738  | 0.1431 | 0.048991 | 18 | 37692576  | 0.015216 | 0.83   | 18 | 35272539 | 0.002  | 7.09E-12 |
| rs56174996 | A | G | A | G | -0.0143 | 0.0198438    | 0.1359 | 0.068924 | 1  | 90679624  | 0.013641 | 0.15   | 1  | 91145181 | 0.002  | 2.81E-12 |
| rs56306882 | A | G | A | G | 0.0086  | -0.0219218   | 0.2741 | 0.039385 | 3  | 70204542  | 0.017442 | 0.21   | 3  | 70253693 | 0.0016 | 4.82E-08 |
| rs56319902 | T | C | T | C | -0.0206 | 0.0195947    | 0.2155 | 0.006724 | 17 | 45794616  | 0.042106 | 0.64   | 17 | 43871982 | 0.0017 | 5.81E-33 |
| rs56391344 | A | G | A | G | 0.0148  | 0.0134339    | 0.2526 | 0.036503 | 15 | 77714557  | 0.01745  | 0.44   | 15 | 78006899 | 0.0016 | 7.49E-20 |
| rs563954   | A | G | A | G | -0.0081 | -0.0170386   | 0.4639 | 0.829011 | 11 | 132521762 | 0.00915  | 0.063  | 11 | 1.32E+08 | 0.0014 | 1.34E-08 |
| rs56405138 | A | T | A | T | 0.0153  | 0.0174961    | 0.1231 | 0.066282 | 4  | 165205593 | 0.013388 | 0.19   | 4  | 1.66E+08 | 0.0022 | 1.31E-12 |
| rs567003   | A | G | A | G | 0.0094  | -0.0132121   | 0.3538 | 0.057637 | 7  | 105701161 | 0.014292 | 0.36   | 7  | 1.05E+08 | 0.0015 | 2.27E-10 |
| rs56794817 | A | G | A | G | 0.0122  | -0.00115699  | 0.1615 | 0.512728 | 17 | 61924617  | 0.006583 | 0.86   | 17 | 60001978 | 0.0019 | 1.69E-10 |
| rs57016874 | T | C | T | C | 0.0209  | 0.0371803    | 0.0387 | 0.006004 | 2  | 219445390 | 0.04284  | 0.39   | 2  | 2.2E+08  | 0.0037 | 1.90E-08 |
| rs57148205 | A | G | A | G | 0.0095  | -0.000861242 | 0.2438 | 0.029539 | 2  | 224824704 | 0.020411 | 0.97   | 2  | 2.26E+08 | 0.0016 | 5.17E-09 |
| rs57204268 | A | G | A | G | 0.0114  | -0.00719371  | 0.8497 | 0.810279 | 11 | 133974129 | 0.008766 | 0.41   | 11 | 1.34E+08 | 0.002  | 9.94E-09 |
| rs57349798 | A | G | A | G | 0.0093  | -0.011428    | 0.4094 | 0.145773 | 6  | 37518276  | 0.009667 | 0.24   | 6  | 37486052 | 0.0014 | 8.63E-11 |
| rs57352738 | A | T | A | T | -0.0152 | -0.0174416   | 0.204  | 0.060038 | 7  | 133619940 | 0.014352 | 0.22   | 7  | 1.33E+08 | 0.0017 | 2.51E-18 |
| rs57437407 | A | G | A | G | -0.0145 | -0.010686    | 0.89   | 0.965178 | 3  | 86124473  | 0.018663 | 0.57   | 3  | 86173623 | 0.0023 | 2.67E-10 |
| rs575113   | A | G | A | G | 0.0133  | 0.00695305   | 0.2941 | 0.3122   | 1  | 109503751 | 0.007376 | 0.35   | 1  | 1.1E+08  | 0.0015 | 7.52E-18 |
| rs5754753  | T | C | T | C | -0.0126 | -0.016989    | 0.7178 | 0.964457 | 22 | 33900763  | 0.016201 | 0.29   | 22 | 34296751 | 0.0016 | 6.15E-16 |
| rs5754762  | A | G | A | G | 0.0197  | -0.00665499  | 0.9405 | 0.739433 | 22 | 33933235  | 0.007566 | 0.38   | 22 | 34329224 | 0.003  | 2.95E-11 |
| rs580652   | T | C | T | C | -0.0147 | -0.00215896  | 0.9017 | 0.695005 | 11 | 85193698  | 0.007509 | 0.77   | 11 | 84904742 | 0.0024 | 4.65E-10 |



|            |   |   |   |   |         |             |        |          |    |           |          |        |    |          |        |          |
|------------|---|---|---|---|---------|-------------|--------|----------|----|-----------|----------|--------|----|----------|--------|----------|
| rs585557   | A | G | A | G | 0.0128  | -0.00879496 | 0.8014 | 0.62464  | 11 | 65896076  | 0.006902 | 0.2    | 11 | 65663547 | 0.0018 | 3.25E-13 |
| rs58779949 | A | C | A | C | 0.011   | -0.0190696  | 0.1698 | 0.064842 | 11 | 64239687  | 0.013809 | 0.17   | 11 | 64007159 | 0.0019 | 3.84E-09 |
| rs58859557 | T | C | T | C | 0.0187  | 0.000109095 | 0.0702 | 0.149856 | 1  | 43544785  | 0.009517 | 0.99   | 1  | 44010456 | 0.0028 | 2.82E-11 |
| rs58996896 | A | G | A | G | -0.0094 | 0.00211385  | 0.7388 | 0.824448 | 2  | 122977429 | 0.009046 | 0.82   | 2  | 1.24E+08 | 0.0016 | 4.23E-09 |
| rs590013   | T | C | T | C | 0.01    | 0.0123643   | 0.6772 | 0.793228 | 1  | 28829226  | 0.008156 | 0.13   | 1  | 29155738 | 0.0015 | 2.47E-11 |
| rs59123361 | C | G | A | G | 0.0203  | -0.0251342  | 0.9006 | 0.027137 | 1  | 110223832 | 0.021028 | 0.23   | 1  | 1.11E+08 | 0.0024 | 7.78E-18 |
| rs59300999 | T | C | T | C | -0.0164 | 0.00616747  | 0.9325 | 0.491835 | 21 | 31700050  | 0.006778 | 0.36   | 21 | 33072363 | 0.0028 | 4.85E-09 |
| rs59480703 | C | G | C | G | -0.0123 | -0.00238965 | 0.1936 | 0.365994 | 8  | 9795620   | 0.007187 | 0.74   | 8  | 9653130  | 0.0018 | 3.97E-12 |
| rs59718180 | A | C | G | A | 0.0083  | -0.0213444  | 0.3496 | 0.115034 | 2  | 139690168 | 0.010866 | 0.049  | 2  | 1.4E+08  | 0.0015 | 2.94E-08 |
| rs59813324 | T | G | T | G | 0.0097  | 0.0078774   | 0.1983 | 0.346302 | 12 | 60485892  | 0.007199 | 0.27   | 12 | 60879673 | 0.0018 | 4.15E-08 |
| rs60096640 | A | G | A | G | 0.0159  | -0.00163646 | 0.8926 | 0.621037 | 6  | 27668534  | 0.007019 | 0.82   | 6  | 27636313 | 0.0023 | 2.24E-12 |
| rs6020560  | T | C | T | C | -0.0083 | 0.0012906   | 0.5258 | 0.662104 | 20 | 50502882  | 0.007262 | 0.86   | 20 | 49119419 | 0.0014 | 3.84E-09 |
| rs60589532 | A | G | A | G | 0.0168  | 0.00377812  | 0.9345 | 0.865994 | 2  | 57845470  | 0.009817 | 0.7    | 2  | 58072605 | 0.0028 | 3.03E-09 |
| rs606308   | A | G | A | G | 0.0095  | -0.00952566 | 0.2788 | 0.15562  | 20 | 35206575  | 0.00928  | 0.3    | 20 | 33794378 | 0.0016 | 1.76E-09 |
| rs6065080  | T | C | T | C | -0.013  | -0.0108976  | 0.3589 | 0.455091 | 20 | 61257735  | 0.006823 | 0.11   | 20 | 59832791 | 0.0015 | 7.49E-19 |
| rs6065784  | C | G | C | G | 0.011   | -0.0144432  | 0.6953 | 0.969501 | 20 | 45088794  | 0.019331 | 0.45   | 20 | 43717435 | 0.0015 | 5.78E-13 |
| rs6091570  | A | G | A | G | 0.0081  | -0.00695349 | 0.3491 | 0.247358 | 20 | 52683345  | 0.007787 | 0.37   | 20 | 51299884 | 0.0015 | 3.20E-08 |
| rs61104616 | A | G | A | G | -0.0172 | 0.0163922   | 0.5249 | 0.528338 | 5  | 88867954  | 0.006928 | 0.018  | 5  | 88163771 | 0.0014 | 1.56E-34 |
| rs61387839 | A | G | A | G | 0.0088  | -0.0308662  | 0.695  | 0.98463  | 2  | 48461496  | 0.02767  | 0.26   | 2  | 48688635 | 0.0015 | 1.11E-08 |
| rs61739710 | A | G | A | G | -0.0099 | -0.00896046 | 0.2813 | 0.157061 | 21 | 33553383  | 0.009449 | 0.34   | 21 | 34925689 | 0.0016 | 3.74E-10 |
| rs61755388 | T | C | T | C | 0.0125  | -0.0452538  | 0.7878 | 0.965658 | 7  | 126901263 | 0.018535 | 0.015  | 7  | 1.27E+08 | 0.0017 | 3.88E-13 |
| rs61798586 | A | C | A | C | -0.0112 | 0.00797723  | 0.1444 | 0.115034 | 4  | 36690073  | 0.01059  | 0.45   | 4  | 36691695 | 0.002  | 2.05E-08 |
| rs61853335 | T | C | T | C | -0.0109 | 0.000581103 | 0.1769 | 0.35879  | 10 | 63124977  | 0.007157 | 0.94   | 10 | 64884737 | 0.0018 | 3.29E-09 |
| rs618869   | T | G | A | G | -0.0163 | -0.010495   | 0.8285 | 0.016811 | 18 | 55580920  | 0.025836 | 0.68   | 18 | 53210302 | 0.0019 | 1.95E-18 |
| rs61958175 | A | G | A | G | -0.0198 | -0.00791251 | 0.9538 | 0.962536 | 13 | 58106116  | 0.018164 | 0.66   | 13 | 58680250 | 0.0034 | 8.22E-09 |
| rs62051146 | A | C | A | C | -0.0134 | -0.00162395 | 0.8886 | 0.794909 | 16 | 72463822  | 0.008269 | 0.84   | 16 | 72497721 | 0.0022 | 1.79E-09 |
| rs62090515 | A | G | A | G | -0.009  | 0.0146864   | 0.3605 | 0.157541 | 18 | 45091671  | 0.009376 | 0.12   | 18 | 42671636 | 0.0015 | 6.88E-10 |
| rs62103236 | T | C | T | C | -0.0147 | 0.0114765   | 0.9087 | 0.013689 | 18 | 79880561  | 0.029799 | 0.7    | 18 | 77634276 | 0.0025 | 2.69E-09 |
| rs62109862 | A | G | A | G | 0.0136  | -0.00111688 | 0.1418 | 0.574928 | 19 | 12900995  | 0.006786 | 0.87   | 19 | 13011809 | 0.002  | 2.85E-11 |
| rs62124721 | T | G | T | C | -0.0127 | -0.00354378 | 0.1216 | 0.012488 | 2  | 12687624  | 0.029953 | 0.91   | 2  | 12836640 | 0.0021 | 3.16E-09 |
| rs62142891 | A | G | A | G | 0.0108  | 0.0155815   | 0.2632 | 0.016811 | 2  | 51311975  | 0.025475 | 0.54   | 2  | 51539113 | 0.0016 | 1.05E-11 |
| rs62155770 | A | G | A | G | -0.0196 | -0.0140531  | 0.9474 | 0.993276 | 2  | 99364759  | 0.0421   | 0.74   | 2  | 99981222 | 0.0032 | 6.88E-10 |
| rs62155873 | T | C | T | C | -0.0151 | 0.0131717   | 0.1221 | 0.028338 | 2  | 105352905 | 0.020617 | 0.52   | 2  | 1.06E+08 | 0.0021 | 1.65E-12 |
| rs62174974 | A | G | A | G | -0.0105 | -0.00774443 | 0.1949 | 0.337896 | 2  | 184188658 | 0.007255 | 0.29   | 2  | 1.85E+08 | 0.0018 | 2.76E-09 |
| rs62179650 | A | G | A | G | 0.0112  | -0.0194507  | 0.2995 | 0.086936 | 2  | 188271157 | 0.011739 | 0.098  | 2  | 1.89E+08 | 0.0016 | 5.66E-13 |
| rs62190914 | T | C | T | C | 0.0089  | -6.99E-05   | 0.636  | 0.602546 | 2  | 235879531 | 0.006853 | 0.99   | 2  | 2.37E+08 | 0.0015 | 1.25E-09 |
| rs62194170 | A | G | A | G | 0.0111  | -0.0119576  | 0.2025 | 0.436359 | 2  | 161009993 | 0.006957 | 0.086  | 2  | 1.62E+08 | 0.0017 | 2.41E-10 |
| rs622169   | T | C | T | C | 0.0086  | 0.00274204  | 0.4536 | 0.056196 | 1  | 244274105 | 0.013453 | 0.84   | 1  | 2.44E+08 | 0.0014 | 2.73E-09 |
| rs62247449 | C | G | C | G | 0.0114  | 0.00386503  | 0.4357 | 0.178915 | 3  | 64444875  | 0.008804 | 0.66   | 3  | 64430551 | 0.0014 | 8.79E-16 |
| rs62252819 | A | T | A | T | -0.0094 | 0.00803589  | 0.7522 | 0.922911 | 3  | 53406101  | 0.012551 | 0.52   | 3  | 53440128 | 0.0017 | 1.20E-08 |
| rs62256284 | T | C | T | C | 0.0111  | -0.00229963 | 0.2093 | 0.314841 | 3  | 70477154  | 0.007405 | 0.76   | 3  | 70526305 | 0.0017 | 1.32E-10 |
| rs62260764 | C | G | C | G | -0.0132 | -0.00444388 | 0.2559 | 0.147935 | 3  | 47949010  | 0.009497 | 0.64   | 3  | 47990500 | 0.0016 | 3.45E-16 |
| rs62262671 | A | G | A | G | 0.0213  | 0.00779144  | 0.8634 | 0.993036 | 3  | 49612440  | 0.0414   | 0.85   | 3  | 49649873 | 0.002  | 2.22E-25 |
| rs62370510 | A | T | A | T | -0.0109 | 0.0193831   | 0.1771 | 0.017531 | 5  | 53493368  | 0.026372 | 0.46   | 5  | 52789198 | 0.0019 | 5.59E-09 |
| rs62379838 | T | C | T | C | 0.0121  | 0.00581268  | 0.6953 | 0.85975  | 5  | 120766333 | 0.009968 | 0.56   | 5  | 1.2E+08  | 0.0015 | 1.77E-15 |
| rs62409395 | T | C | T | C | 0.0101  | 0.000766395 | 0.7755 | 0.763929 | 4  | 25603414  | 0.007901 | 0.92   | 4  | 25605036 | 0.0018 | 3.55E-08 |
| rs62506074 | T | C | T | C | 0.0091  | 0.00447938  | 0.343  | 0.283381 | 8  | 31048573  | 0.007553 | 0.55   | 8  | 30906089 | 0.0015 | 8.64E-10 |
| rs62506104 | A | G | A | G | -0.0098 | 0.0170965   | 0.1923 | 0.111431 | 8  | 31162492  | 0.010871 | 0.12   | 8  | 31020008 | 0.0018 | 3.93E-08 |
| rs628993   | A | G | A | G | 0.0128  | -0.00420952 | 0.1073 | 0.325889 | 11 | 61772219  | 0.007195 | 0.56   | 11 | 61539691 | 0.0023 | 3.83E-08 |
| rs633279   | A | T | A | T | -0.0089 | -0.0130046  | 0.2957 | 0.258165 | 6  | 93130987  | 0.007878 | 0.099  | 6  | 93840705 | 0.0015 | 8.12E-09 |
| rs635754   | A | G | A | G | 0.0119  | -0.017629   | 0.5809 | 0.478626 | 1  | 96019384  | 0.006894 | 0.011  | 1  | 96484940 | 0.0014 | 6.36E-17 |
| rs6428587  | T | C | T | C | 0.0084  | -0.0206053  | 0.6323 | 0.731268 | 1  | 90359630  | 0.007812 | 0.0083 | 1  | 90825188 | 0.0015 | 8.59E-09 |
| rs6435326  | A | T | A | T | -0.0091 | 0.00406845  | 0.5148 | 0.710855 | 2  | 206137835 | 0.007623 | 0.59   | 2  | 2.07E+08 | 0.0014 | 7.56E-11 |
| rs6449503  | A | G | A | G | 0.0185  | 0.00261655  | 0.5038 | 0.844861 | 5  | 60799445  | 0.008814 | 0.77   | 5  | 60095272 | 0.0014 | 1.84E-39 |
| rs6452793  | T | G | T | G | 0.0175  | -0.00794881 | 0.234  | 0.036744 | 5  | 88522356  | 0.016847 | 0.64   | 5  | 87818174 | 0.0017 | 4.47E-26 |

|            |   |   |   |   |         |              |        |          |    |           |          |       |    |          |        |          |
|------------|---|---|---|---|---------|--------------|--------|----------|----|-----------|----------|-------|----|----------|--------|----------|
| rs6461536  | A | G | A | G | 0.0088  | 0.00673389   | 0.7118 | 0.622959 | 7  | 21092188  | 0.006938 | 0.33  | 7  | 21131807 | 0.0015 | 1.28E-08 |
| rs6469654  | C | G | C | G | -0.0103 | -0.00415766  | 0.7769 | 0.537704 | 8  | 116620726 | 0.006825 | 0.54  | 8  | 1.18E+08 | 0.0017 | 1.10E-09 |
| rs6480234  | T | C | T | C | -0.0084 | 0.00199117   | 0.525  | 0.847022 | 10 | 66877136  | 0.009418 | 0.83  | 10 | 68636894 | 0.0014 | 1.94E-09 |
| rs6490618  | T | C | T | C | 0.0088  | 0.00521264   | 0.327  | 0.772334 | 13 | 20764204  | 0.008048 | 0.52  | 13 | 21338343 | 0.0015 | 3.48E-09 |
| rs6493265  | T | C | T | C | -0.0122 | -0.00559293  | 0.3915 | 0.116955 | 15 | 47221056  | 0.010563 | 0.6   | 15 | 47513253 | 0.0014 | 2.26E-17 |
| rs6493275  | A | T | A | T | 0.0131  | 0.0148808    | 0.7885 | 0.961335 | 15 | 47384382  | 0.01781  | 0.4   | 15 | 47676579 | 0.0017 | 2.98E-14 |
| rs6567288  | A | G | A | G | -0.0079 | -0.0124833   | 0.5719 | 0.251201 | 18 | 62551101  | 0.007732 | 0.11  | 18 | 60218334 | 0.0014 | 2.81E-08 |
| rs6569077  | T | C | T | C | 0.0118  | 0.00546433   | 0.3894 | 0.571326 | 6  | 97764533  | 0.006815 | 0.42  | 6  | 98212409 | 0.0014 | 3.29E-16 |
| rs6573552  | T | C | T | C | -0.009  | -0.0092663   | 0.496  | 0.770413 | 14 | 64283515  | 0.008089 | 0.25  | 14 | 64750233 | 0.0014 | 1.17E-10 |
| rs6573559  | T | G | T | G | 0.0105  | 0.0138999    | 0.3152 | 0.396494 | 14 | 64456448  | 0.006933 | 0.045 | 14 | 64923166 | 0.0015 | 3.11E-12 |
| rs660001   | A | G | A | G | -0.0164 | 0.00523481   | 0.2113 | 0.227906 | 5  | 114530901 | 0.00818  | 0.52  | 5  | 1.14E+08 | 0.0017 | 1.66E-21 |
| rs66482320 | C | G | C | G | 0.0124  | -0.00206444  | 0.888  | 0.899376 | 21 | 41317004  | 0.011232 | 0.85  | 21 | 42688931 | 0.0022 | 2.57E-08 |
| rs66568921 | T | G | T | G | -0.0181 | -0.00350071  | 0.6441 | 0.466859 | 3  | 85622868  | 0.006735 | 0.6   | 3  | 85672018 | 0.0015 | 7.60E-34 |
| rs66721975 | A | G | A | G | -0.0087 | 0.0100311    | 0.2903 | 0.135927 | 2  | 190836459 | 0.009613 | 0.3   | 2  | 1.92E+08 | 0.0015 | 1.51E-08 |
| rs6690195  | T | C | T | C | -0.0113 | -0.0305243   | 0.4907 | 0.036503 | 1  | 95756097  | 0.017682 | 0.084 | 1  | 96221653 | 0.0014 | 7.89E-16 |
| rs6695132  | T | C | T | C | 0.0097  | 0.00431085   | 0.2216 | 0.727906 | 1  | 234598909 | 0.007654 | 0.57  | 1  | 2.35E+08 | 0.0017 | 1.01E-08 |
| rs6696068  | T | G | T | G | -0.0088 | -0.00643524  | 0.3838 | 0.580692 | 1  | 53275125  | 0.006723 | 0.34  | 1  | 53740797 | 0.0014 | 9.50E-10 |
| rs6697584  | T | C | T | C | -0.0126 | -0.00578284  | 0.7852 | 0.922671 | 1  | 181540582 | 0.012901 | 0.65  | 1  | 1.82E+08 | 0.0017 | 1.43E-13 |
| rs6704768  | A | G | A | G | -0.0116 | 0.00901615   | 0.5648 | 0.48415  | 2  | 232727791 | 0.006928 | 0.19  | 2  | 2.34E+08 | 0.0014 | 1.84E-16 |
| rs6706275  | T | C | T | C | 0.0083  | 0.00602314   | 0.3246 | 0.063641 | 2  | 239343922 | 0.013981 | 0.67  | 2  | 2.4E+08  | 0.0015 | 2.81E-08 |
| rs6711399  | T | C | T | C | -0.0107 | -0.00077362  | 0.1779 | 0.450048 | 2  | 199598117 | 0.006752 | 0.91  | 2  | 2E+08    | 0.0019 | 1.16E-08 |
| rs6715321  | T | C | T | C | -0.0097 | -0.00525353  | 0.4277 | 0.317483 | 2  | 99492539  | 0.007508 | 0.48  | 2  | 1E+08    | 0.0014 | 7.62E-12 |
| rs6715849  | A | G | A | G | -0.0122 | 0.0120684    | 0.4401 | 0.236792 | 2  | 99689916  | 0.008113 | 0.14  | 2  | 1E+08    | 0.0014 | 6.87E-18 |
| rs6720515  | A | T | A | T | 0.0103  | -0.0112968   | 0.7763 | 0.614073 | 2  | 155747023 | 0.007044 | 0.11  | 2  | 1.57E+08 | 0.0017 | 7.95E-10 |
| rs67224963 | A | G | A | G | 0.0113  | 0.004684     | 0.2052 | 0.65562  | 5  | 64491983  | 0.006955 | 0.5   | 5  | 63787810 | 0.0017 | 7.19E-11 |
| rs6729612  | T | C | T | C | 0.0092  | 0.00526703   | 0.676  | 0.215418 | 2  | 151923653 | 0.008155 | 0.52  | 2  | 1.53E+08 | 0.0015 | 9.39E-10 |
| rs6731373  | A | G | A | G | -0.0115 | 0.00153345   | 0.339  | 0.147935 | 2  | 68275912  | 0.009508 | 0.87  | 2  | 68503044 | 0.0015 | 1.39E-14 |
| rs6736025  | T | G | T | G | 0.0079  | -0.00176252  | 0.4354 | 0.57853  | 2  | 58570499  | 0.006944 | 0.8   | 2  | 58797634 | 0.0014 | 2.77E-08 |
| rs6738860  | A | T | A | T | -0.0088 | -0.00857325  | 0.4574 | 0.880884 | 2  | 22219227  | 0.010282 | 0.4   | 2  | 22442099 | 0.0014 | 4.65E-10 |
| rs67456868 | A | G | A | G | 0.0119  | 0.0131729    | 0.1839 | 0.038665 | 6  | 118758637 | 0.018034 | 0.47  | 6  | 1.19E+08 | 0.0018 | 5.37E-11 |
| rs6752228  | T | G | T | G | -0.008  | -0.00844669  | 0.5523 | 0.449328 | 2  | 160691186 | 0.006872 | 0.22  | 2  | 1.62E+08 | 0.0014 | 1.26E-08 |
| rs6774533  | T | C | T | C | 0.009   | 0.00778315   | 0.6985 | 0.680355 | 3  | 62485411  | 0.007347 | 0.29  | 3  | 62471086 | 0.0015 | 4.18E-09 |
| rs67790232 | A | G | A | G | 0.0101  | -0.0142128   | 0.794  | 0.882325 | 12 | 45685389  | 0.010625 | 0.18  | 12 | 46079172 | 0.0017 | 6.90E-09 |
| rs6780414  | T | C | T | C | 0.0105  | -0.014804    | 0.8176 | 0.839337 | 3  | 67334246  | 0.00929  | 0.11  | 3  | 67384670 | 0.0018 | 7.10E-09 |
| rs68044584 | T | C | T | C | 0.0113  | 0.0157124    | 0.3063 | 0.977906 | 3  | 108126548 | 0.022469 | 0.48  | 3  | 1.08E+08 | 0.0015 | 1.02E-13 |
| rs6812533  | T | C | T | C | 0.0106  | 0.0129558    | 0.7444 | 0.709414 | 4  | 39686218  | 0.007615 | 0.089 | 4  | 39687838 | 0.0016 | 4.85E-11 |
| rs68145588 | T | G | T | G | -0.0127 | -0.0151414   | 0.1395 | 0.086455 | 17 | 77868723  | 0.012316 | 0.22  | 17 | 75864805 | 0.0021 | 7.53E-10 |
| rs6824567  | T | C | T | C | 0.013   | 0.000976432  | 0.2827 | 0.047791 | 4  | 2881445   | 0.015747 | 0.95  | 4  | 2883172  | 0.0016 | 8.91E-17 |
| rs6853599  | T | C | T | C | 0.0108  | 0.027618     | 0.1787 | 0.014169 | 4  | 3443883   | 0.02874  | 0.34  | 4  | 3445610  | 0.0019 | 6.27E-09 |
| rs6861925  | C | G | C | G | -0.009  | -0.0103148   | 0.4902 | 0.418588 | 5  | 176897728 | 0.006743 | 0.13  | 5  | 1.76E+08 | 0.0014 | 1.76E-10 |
| rs6871635  | A | G | A | G | -0.0087 | 0.0192188    | 0.43   | 0.278098 | 5  | 134494704 | 0.00763  | 0.012 | 5  | 1.34E+08 | 0.0014 | 1.16E-09 |
| rs6881581  | A | G | A | G | -0.0096 | 0.000941919  | 0.3278 | 0.196926 | 5  | 141566788 | 0.008457 | 0.91  | 5  | 1.41E+08 | 0.0015 | 1.08E-10 |
| rs6881733  | T | C | T | C | -0.0086 | -0.00478154  | 0.287  | 0.366715 | 5  | 93251285  | 0.007067 | 0.5   | 5  | 92586991 | 0.0016 | 4.08E-08 |
| rs6917154  | T | C | T | C | 0.0127  | -0.00826646  | 0.1236 | 0.048511 | 6  | 166721668 | 0.015789 | 0.6   | 6  | 1.67E+08 | 0.0021 | 2.55E-09 |
| rs6917204  | T | C | T | C | 0.0119  | -0.00291669  | 0.7951 | 0.456772 | 6  | 144963580 | 0.006937 | 0.67  | 6  | 1.45E+08 | 0.0017 | 8.14E-12 |
| rs6918506  | C | G | C | G | 0.0113  | 0.00651675   | 0.5379 | 0.290826 | 6  | 26577629  | 0.007508 | 0.39  | 6  | 26577857 | 0.0014 | 9.57E-16 |
| rs6924023  | A | G | A | G | 0.0107  | -0.00356864  | 0.7548 | 0.085975 | 6  | 169675945 | 0.011337 | 0.75  | 6  | 1.7E+08  | 0.0016 | 5.17E-11 |
| rs6932108  | C | G | C | G | -0.021  | -0.00720724  | 0.0798 | 0.011287 | 6  | 98266116  | 0.032654 | 0.83  | 6  | 98713992 | 0.0027 | 6.10E-15 |
| rs6946136  | A | G | A | G | 0.0081  | -0.00714866  | 0.6116 | 0.669549 | 7  | 135738676 | 0.007302 | 0.33  | 7  | 1.35E+08 | 0.0014 | 1.99E-08 |
| rs6946362  | T | C | T | C | 0.0091  | -0.00172712  | 0.6884 | 0.451969 | 7  | 6535176   | 0.00698  | 0.8   | 7  | 6574807  | 0.0015 | 1.89E-09 |
| rs6951996  | A | T | A | T | -0.0182 | -0.0119668   | 0.0522 | 0.035303 | 7  | 97017125  | 0.018057 | 0.51  | 7  | 96646437 | 0.0032 | 1.41E-08 |
| rs6969783  | A | T | A | T | -0.0098 | -0.00999151  | 0.4705 | 0.317243 | 7  | 117953254 | 0.007295 | 0.17  | 7  | 1.18E+08 | 0.0014 | 2.87E-12 |
| rs6989141  | A | G | A | G | 0.01    | -0.017499    | 0.208  | 0.019933 | 8  | 141671360 | 0.024481 | 0.47  | 8  | 1.43E+08 | 0.0017 | 8.40E-09 |
| rs7012546  | T | C | T | C | 0.0092  | -0.0029104   | 0.4166 | 0.185399 | 8  | 104055509 | 0.008708 | 0.74  | 8  | 1.05E+08 | 0.0014 | 1.25E-10 |
| rs7016302  | C | G | C | G | -0.0125 | -0.000571311 | 0.8308 | 0.897454 | 8  | 4975519   | 0.011077 | 0.96  | 8  | 4833041  | 0.0019 | 2.26E-11 |

|            |   |   |   |   |         |              |        |          |    |           |          |       |    |          |        |          |
|------------|---|---|---|---|---------|--------------|--------|----------|----|-----------|----------|-------|----|----------|--------|----------|
| rs702606   | T | C | T | C | 0.0118  | -0.00135488  | 0.8654 | 0.875841 | 5  | 53871287  | 0.010607 | 0.9   | 5  | 53167117 | 0.0021 | 9.19E-09 |
| rs7029718  | A | G | A | G | 0.0244  | -0.00451958  | 0.4108 | 0.469981 | 9  | 23358497  | 0.006803 | 0.51  | 9  | 23358495 | 0.0014 | 7.82E-65 |
| rs7030373  | A | G | A | G | -0.0098 | 0.0100742    | 0.2074 | 0.439481 | 9  | 118399648 | 0.007033 | 0.15  | 9  | 1.21E+08 | 0.0017 | 1.49E-08 |
| rs7035315  | A | G | A | G | -0.009  | -0.000354434 | 0.6292 | 0.601585 | 9  | 80616596  | 0.007014 | 0.96  | 9  | 83231511 | 0.0015 | 5.85E-10 |
| rs7041702  | A | G | A | G | -0.0111 | 0.00621766   | 0.7406 | 0.869356 | 9  | 33053432  | 0.010272 | 0.54  | 9  | 33053430 | 0.0016 | 4.53E-12 |
| rs7084508  | T | C | T | C | -0.0085 | 0.00613646   | 0.3479 | 0.267291 | 10 | 132119442 | 0.00758  | 0.42  | 10 | 1.34E+08 | 0.0015 | 8.79E-09 |
| rs711793   | T | C | T | C | 0.0103  | -0.0154143   | 0.3474 | 0.292747 | 2  | 173311193 | 0.007489 | 0.04  | 2  | 1.74E+08 | 0.0015 | 5.01E-12 |
| rs7146625  | A | G | A | G | 0.0091  | -0.00668284  | 0.7313 | 0.65658  | 14 | 84321809  | 0.007128 | 0.35  | 14 | 84788153 | 0.0016 | 7.55E-09 |
| rs7147473  | A | G | A | G | -0.0103 | -0.0127411   | 0.6719 | 0.981748 | 14 | 30139332  | 0.024269 | 0.6   | 14 | 30608538 | 0.0015 | 6.33E-12 |
| rs7158218  | A | C | A | C | -0.009  | -0.00232522  | 0.7117 | 0.853987 | 14 | 73468175  | 0.009852 | 0.81  | 14 | 73934880 | 0.0015 | 5.63E-09 |
| rs71646142 | T | C | T | C | 0.0104  | -0.0168559   | 0.1893 | 0.024015 | 1  | 212195886 | 0.02099  | 0.42  | 1  | 2.12E+08 | 0.0018 | 5.69E-09 |
| rs716513   | A | T | A | T | 0.0084  | -0.000574834 | 0.536  | 0.192603 | 13 | 68914776  | 0.008658 | 0.95  | 13 | 69488908 | 0.0014 | 2.83E-09 |
| rs7167688  | T | C | T | C | -0.0094 | -0.00417725  | 0.4917 | 0.194765 | 15 | 26567990  | 0.008704 | 0.63  | 15 | 26813137 | 0.0014 | 1.71E-11 |
| rs7171405  | A | G | A | G | -0.0101 | 0.00225606   | 0.2432 | 0.189481 | 15 | 61174694  | 0.008734 | 0.8   | 15 | 61466893 | 0.0016 | 7.53E-10 |
| rs717996   | T | C | T | C | -0.0122 | -0.00393361  | 0.5986 | 0.747118 | 12 | 83740041  | 0.007954 | 0.62  | 12 | 84133820 | 0.0014 | 1.89E-17 |
| rs7190     | A | G | A | G | -0.0095 | 0.00478335   | 0.3514 | 0.772334 | 18 | 5889766   | 0.008144 | 0.56  | 18 | 5889765  | 0.0015 | 1.50E-10 |
| rs7196496  | T | G | C | T | 0.0177  | -0.00277417  | 0.0528 | 0.027618 | 16 | 66718992  | 0.020852 | 0.89  | 16 | 66750040 | 0.0031 | 1.58E-08 |
| rs721579   | T | C | T | C | -0.011  | 0.00269995   | 0.2617 | 0.473343 | 17 | 45293115  | 0.006837 | 0.69  | 17 | 43370481 | 0.0016 | 5.96E-12 |
| rs7218235  | A | G | A | G | -0.0097 | 0.00839213   | 0.2135 | 0.179875 | 17 | 2660973   | 0.008922 | 0.35  | 17 | 2564267  | 0.0017 | 2.44E-08 |
| rs7223311  | C | G | C | G | -0.0079 | 0.00201233   | 0.5169 | 0.544669 | 17 | 80966814  | 0.006839 | 0.77  | 17 | 78940614 | 0.0014 | 1.77E-08 |
| rs7226824  | T | C | T | C | -0.0078 | -0.000402616 | 0.5305 | 0.48439  | 18 | 30096862  | 0.006866 | 0.95  | 18 | 27676827 | 0.0014 | 2.72E-08 |
| rs72482130 | T | C | T | C | 0.0141  | -0.00184053  | 0.8464 | 0.769452 | 2  | 236145712 | 0.008255 | 0.82  | 2  | 2.37E+08 | 0.0019 | 4.59E-13 |
| rs7254263  | T | C | T | C | -0.0119 | -0.00136001  | 0.285  | 0.428194 | 19 | 30250350  | 0.006952 | 0.84  | 19 | 30741257 | 0.0016 | 1.84E-14 |
| rs7255223  | A | C | A | C | 0.0097  | 0.00174643   | 0.2691 | 0.177954 | 19 | 32333404  | 0.008953 | 0.85  | 19 | 32824310 | 0.0016 | 1.06E-09 |
| rs72622559 | T | C | T | C | -0.012  | -0.00776357  | 0.2301 | 0.3122   | 3  | 175955109 | 0.007349 | 0.29  | 3  | 1.76E+08 | 0.0017 | 5.50E-13 |
| rs72636697 | T | C | T | C | -0.014  | -0.00308317  | 0.1551 | 0.090298 | 4  | 67150891  | 0.011895 | 0.8   | 4  | 68016609 | 0.002  | 1.31E-12 |
| rs72667460 | T | C | T | C | 0.0197  | 0.0476006    | 0.0539 | 0.005043 | 1  | 66070329  | 0.048548 | 0.33  | 1  | 66536012 | 0.0031 | 2.44E-10 |
| rs72671456 | A | G | A | G | -0.0174 | 0.0322052    | 0.1374 | 0.020173 | 14 | 29193531  | 0.024077 | 0.18  | 14 | 29662737 | 0.002  | 1.27E-17 |
| rs72672052 | A | T | A | T | -0.0101 | -0.00889893  | 0.1753 | 0.139529 | 8  | 114786195 | 0.009684 | 0.36  | 8  | 1.16E+08 | 0.0018 | 4.87E-08 |
| rs72677177 | A | G | A | G | 0.01    | -0.00108505  | 0.4017 | 0.382325 | 1  | 71654351  | 0.006987 | 0.88  | 1  | 72120034 | 0.0014 | 3.03E-12 |
| rs72792395 | T | C | T | C | -0.0145 | 0.017875     | 0.1093 | 0.096302 | 2  | 44659005  | 0.011708 | 0.13  | 2  | 44886144 | 0.0022 | 1.09E-10 |
| rs728054   | A | G | A | G | -0.0128 | 0.0134395    | 0.3561 | 0.318444 | 7  | 137387618 | 0.007469 | 0.072 | 7  | 1.37E+08 | 0.0015 | 2.34E-18 |
| rs72819118 | T | C | T | C | -0.0231 | -0.0273284   | 0.0942 | 0.012248 | 2  | 99834895  | 0.031399 | 0.38  | 2  | 1E+08    | 0.0024 | 8.29E-22 |
| rs72824753 | T | C | T | C | 0.0133  | -0.00446445  | 0.9005 | 0.82829  | 6  | 14618917  | 0.0091   | 0.62  | 6  | 14619148 | 0.0024 | 1.93E-08 |
| rs72828517 | T | C | T | C | -0.0168 | -0.00807434  | 0.8273 | 0.825648 | 6  | 19035804  | 0.009063 | 0.37  | 6  | 19036035 | 0.0019 | 1.38E-19 |
| rs72834698 | A | G | A | G | 0.0117  | -0.0145222   | 0.144  | 0.01537  | 6  | 26176289  | 0.028131 | 0.61  | 6  | 26176517 | 0.002  | 4.91E-09 |
| rs72881110 | A | T | A | T | 0.0146  | 0.00173309   | 0.0753 | 0.028578 | 2  | 44526881  | 0.020202 | 0.93  | 2  | 44754020 | 0.0027 | 3.59E-08 |
| rs72883760 | A | G | A | G | 0.0101  | 0.00262191   | 0.1985 | 0.138569 | 11 | 29310422  | 0.009642 | 0.79  | 11 | 29331969 | 0.0018 | 8.64E-09 |
| rs72894681 | T | G | T | G | 0.0162  | 0.00934529   | 0.0707 | 0.951009 | 2  | 182643020 | 0.016141 | 0.56  | 2  | 1.84E+08 | 0.0028 | 4.88E-09 |
| rs72919450 | T | C | T | C | -0.0132 | 0.00747086   | 0.0997 | 0.051873 | 2  | 81772444  | 0.015079 | 0.62  | 2  | 81999568 | 0.0023 | 1.67E-08 |
| rs72944064 | T | C | T | C | -0.0098 | -0.0208208   | 0.7437 | 0.958213 | 18 | 65849019  | 0.016813 | 0.22  | 18 | 63516255 | 0.0016 | 9.39E-10 |
| rs72962169 | T | C | T | C | -0.0174 | -0.0234268   | 0.1595 | 0.072526 | 11 | 72654625  | 0.012987 | 0.071 | 11 | 72365669 | 0.0019 | 1.26E-19 |
| rs72993796 | T | C | T | C | 0.0127  | -0.0356228   | 0.8836 | 0.98391  | 2  | 239399357 | 0.025936 | 0.17  | 2  | 2.4E+08  | 0.0022 | 1.12E-08 |
| rs73034295 | A | G | A | G | 0.0099  | -0.023023    | 0.2016 | 0.043468 | 11 | 133952238 | 0.016715 | 0.17  | 11 | 1.34E+08 | 0.0018 | 2.11E-08 |
| rs730384   | A | G | A | G | 0.0101  | 0.00141298   | 0.4388 | 0.219741 | 14 | 74423167  | 0.008218 | 0.86  | 14 | 74889870 | 0.0014 | 9.38E-13 |
| rs73039077 | C | G | C | G | 0.0092  | -0.0146955   | 0.2471 | 0.018252 | 3  | 16994895  | 0.024563 | 0.55  | 3  | 17036387 | 0.0016 | 1.75E-08 |
| rs73046392 | A | G | A | G | 0.0175  | -0.0295996   | 0.9446 | 0.008646 | 7  | 1884597   | 0.037248 | 0.43  | 7  | 1944591  | 0.0032 | 3.79E-08 |
| rs73055556 | A | G | A | G | 0.0111  | 0.00492851   | 0.1385 | 0.380884 | 3  | 27986047  | 0.006981 | 0.48  | 3  | 28027538 | 0.002  | 4.95E-08 |
| rs7321274  | A | G | A | G | 0.0114  | 0.00793808   | 0.7999 | 0.792027 | 13 | 68572054  | 0.00845  | 0.35  | 13 | 69146186 | 0.0018 | 8.21E-11 |
| rs7323027  | A | G | A | G | 0.013   | 0.00324005   | 0.3719 | 0.257685 | 13 | 58119656  | 0.007873 | 0.68  | 13 | 58693790 | 0.0015 | 3.91E-19 |
| rs73344830 | A | G | A | G | 0.017   | -0.00284305  | 0.4181 | 0.288184 | 10 | 102057071 | 0.007387 | 0.7   | 10 | 1.04E+08 | 0.0014 | 1.00E-32 |
| rs73366608 | A | G | G | C | 0.0388  | -0.00791873  | 0.0181 | 0.04707  | 8  | 142261769 | 0.016369 | 0.63  | 8  | 1.43E+08 | 0.0053 | 2.56E-13 |
| rs73405293 | A | G | A | G | 0.0113  | -0.00315606  | 0.1516 | 0.168588 | 12 | 117085112 | 0.009173 | 0.73  | 12 | 1.18E+08 | 0.002  | 7.42E-09 |
| rs73581580 | A | G | A | G | -0.0181 | -0.0525397   | 0.1248 | 0.018492 | 9  | 137357006 | 0.02572  | 0.041 | 9  | 1.4E+08  | 0.0022 | 5.78E-16 |
| rs73643713 | T | C | T | C | -0.0165 | -0.004922    | 0.928  | 0.854707 | 9  | 4163612   | 0.009661 | 0.61  | 9  | 4163612  | 0.0027 | 1.24E-09 |

|            |   |   |   |   |         |              |        |          |    |           |          |       |    |           |        |          |
|------------|---|---|---|---|---------|--------------|--------|----------|----|-----------|----------|-------|----|-----------|--------|----------|
| rs736471   | T | C | T | C | 0.0083  | 0.00849196   | 0.4653 | 0.127281 | 3  | 50481961  | 0.009885 | 0.39  | 3  | 50519392  | 0.0014 | 4.69E-09 |
| rs73648455 | T | C | T | C | -0.0183 | -0.000768943 | 0.0797 | 0.075889 | 9  | 14077379  | 0.013047 | 0.95  | 9  | 14077378  | 0.0026 | 1.99E-12 |
| rs73874335 | T | C | T | C | -0.0178 | 0.00532307   | 0.0607 | 0.116955 | 3  | 158215694 | 0.010549 | 0.61  | 3  | 1.58E+08  | 0.0029 | 1.29E-09 |
| rs73961845 | A | G | A | G | -0.0114 | 0.000400515  | 0.617  | 0.857109 | 2  | 143721414 | 0.009588 | 0.97  | 2  | 1.44E+08  | 0.0014 | 2.52E-15 |
| rs74459683 | A | G | C | A | -0.0147 | 0.00125442   | 0.9026 | 0.013449 | 12 | 122612067 | 0.028491 | 0.96  | 12 | 1.23E+08  | 0.0024 | 5.71E-10 |
| rs74462621 | T | C | T | C | 0.0125  | 0.0225816    | 0.1357 | 0.063881 | 8  | 132720610 | 0.014237 | 0.11  | 8  | 1.34E+08  | 0.002  | 1.21E-09 |
| rs7449561  | A | G | A | G | 0.0102  | 0.00740351   | 0.226  | 0.26633  | 6  | 65505656  | 0.007844 | 0.35  | 6  | 66215549  | 0.0017 | 9.73E-10 |
| rs7451726  | A | G | A | G | 0.0109  | -0.00247276  | 0.7947 | 0.748559 | 6  | 28414717  | 0.007886 | 0.75  | 6  | 28382494  | 0.0017 | 2.86E-10 |
| rs7460106  | T | C | T | C | -0.0123 | 0.0072711    | 0.762  | 0.444524 | 8  | 142453416 | 0.006908 | 0.29  | 8  | 1.44E+08  | 0.0017 | 2.06E-13 |
| rs74615093 | A | G | A | G | 0.0145  | 0.00543741   | 0.0772 | 0.024256 | 16 | 69088140  | 0.022118 | 0.81  | 16 | 69122043  | 0.0026 | 3.67E-08 |
| rs74915041 | A | G | A | G | 0.0241  | 0.0333073    | 0.966  | 0.018972 | 9  | 118439186 | 0.024176 | 0.17  | 9  | 1.21E+08  | 0.0039 | 4.52E-10 |
| rs74944857 | T | G | T | G | -0.0089 | 0.000567941  | 0.3223 | 0.028338 | 4  | 65631196  | 0.019067 | 0.98  | 4  | 66496914  | 0.0015 | 3.62E-09 |
| rs7495033  | A | T | A | T | 0.0095  | 0.0146642    | 0.689  | 0.831412 | 15 | 74913884  | 0.009147 | 0.11  | 15 | 75206225  | 0.0015 | 5.92E-10 |
| rs7561705  | A | G | A | G | 0.0078  | -0.00234558  | 0.472  | 0.404899 | 2  | 142688903 | 0.006894 | 0.73  | 2  | 1.43E+08  | 0.0014 | 2.71E-08 |
| rs7575938  | A | G | A | G | 0.009   | 0.000708241  | 0.3408 | 0.577089 | 2  | 166054167 | 0.006825 | 0.92  | 2  | 1.67E+08  | 0.0015 | 1.13E-09 |
| rs758161   | C | G | C | T | 0.0142  | -0.0793379   | 0.1237 | 0.009126 | 12 | 1857461   | 0.03624  | 0.029 | 12 | 1954096   | 0.0021 | 2.47E-11 |
| rs7590368  | T | C | T | C | -0.0146 | -0.00394262  | 0.7335 | 0.902257 | 2  | 10821348  | 0.011422 | 0.73  | 2  | 10961474  | 0.0016 | 3.98E-20 |
| rs7603132  | A | G | A | G | 0.0137  | 0.00419089   | 0.1938 | 0.139529 | 2  | 4903958   | 0.00981  | 0.67  | 2  | 4951548   | 0.0018 | 1.20E-14 |
| rs76076331 | T | C | T | C | 0.0206  | 0.0138833    | 0.1346 | 0.024015 | 2  | 10837459  | 0.021376 | 0.52  | 2  | 10977585  | 0.0021 | 1.71E-23 |
| rs76077165 | A | C | A | C | 0.0165  | -0.00366657  | 0.0898 | 0.125841 | 2  | 162036828 | 0.010384 | 0.72  | 2  | 1.63E+08  | 0.0025 | 2.62E-11 |
| rs76241605 | A | G | A | G | 0.0139  | 0.0180548    | 0.1142 | 0.013209 | 4  | 139796006 | 0.029696 | 0.54  | 4  | 1.41E+08  | 0.0022 | 6.48E-10 |
| rs76246107 | A | G | A | G | -0.0162 | -0.000429571 | 0.0941 | 0.263929 | 19 | 49618017  | 0.007688 | 0.96  | 19 | 50121274  | 0.0026 | 6.52E-10 |
| rs7625428  | T | C | T | C | 0.0098  | 0.00158246   | 0.6036 | 0.097743 | 3  | 56536879  | 0.010956 | 0.89  | 3  | 56570907  | 0.0014 | 1.07E-11 |
| rs7630133  | A | G | A | G | 0.0082  | -0.00149056  | 0.6553 | 0.46854  | 3  | 124204441 | 0.006875 | 0.83  | 3  | 1.24E+08  | 0.0015 | 2.80E-08 |
| rs763553   | A | G | A | G | 0.0087  | 0.00679436   | 0.4452 | 0.783141 | 8  | 31587980  | 0.008161 | 0.41  | 8  | 31445496  | 0.0014 | 6.41E-10 |
| rs7650602  | A | G | T | C | -0.0089 | 0.0105408    | 0.5599 | 0.698367 | 3  | 141428572 | 0.007494 | 0.16  | 3  | 1.41E+08  | 0.0014 | 2.77E-10 |
| rs76552497 | T | C | T | C | -0.012  | 0.0102928    | 0.1704 | 0.162344 | 8  | 12822171  | 0.00932  | 0.27  | 8  | 12679680  | 0.0019 | 1.17E-10 |
| rs7672622  | A | G | A | G | -0.0088 | 0.000198031  | 0.7459 | 0.716859 | 4  | 156784399 | 0.0075   | 0.98  | 4  | 1.58E+08  | 0.0016 | 4.72E-08 |
| rs767943   | A | C | A | C | -0.0122 | -0.013237    | 0.269  | 0.733429 | 6  | 234446463 | 0.007598 | 0.081 | 6  | 234446691 | 0.0016 | 1.54E-14 |
| rs7683416  | T | C | T | C | 0.0139  | 0.00981642   | 0.4592 | 0.768732 | 4  | 105231827 | 0.007992 | 0.22  | 4  | 1.06E+08  | 0.0014 | 6.05E-23 |
| rs7692359  | T | C | T | C | -0.0109 | -0.0144999   | 0.7786 | 0.958213 | 4  | 82288193  | 0.017012 | 0.39  | 4  | 83209346  | 0.0017 | 1.40E-10 |
| rs77025239 | A | G | A | G | -0.014  | -0.00446759  | 0.1559 | 0.207253 | 3  | 181016397 | 0.00841  | 0.6   | 3  | 1.81E+08  | 0.0019 | 4.65E-13 |
| rs7714719  | C | G | C | G | 0.0116  | -0.021442    | 0.8602 | 0.948127 | 5  | 107163226 | 0.015213 | 0.16  | 5  | 1.06E+08  | 0.002  | 1.12E-08 |
| rs7766240  | T | C | T | C | -0.0134 | 0.00806428   | 0.0964 | 0.080452 | 6  | 16954137  | 0.012546 | 0.52  | 6  | 16954368  | 0.0024 | 2.00E-08 |
| rs7772172  | A | G | A | G | 0.0091  | -0.00932803  | 0.4009 | 0.146254 | 6  | 16662699  | 0.009622 | 0.33  | 6  | 16662928  | 0.0014 | 1.74E-10 |
| rs77826402 | T | C | T | C | 0.0151  | 0.0121582    | 0.073  | 0.120317 | 2  | 99634927  | 0.010647 | 0.25  | 2  | 1E+08     | 0.0027 | 2.05E-08 |
| rs7796103  | C | G | C | G | -0.0077 | -0.00680951  | 0.5168 | 0.350144 | 7  | 41780557  | 0.007195 | 0.34  | 7  | 41820155  | 0.0014 | 3.81E-08 |
| rs7799141  | A | G | A | G | 0.0099  | -0.0039839   | 0.3104 | 0.318684 | 7  | 132975729 | 0.007457 | 0.59  | 7  | 1.33E+08  | 0.0015 | 5.31E-11 |
| rs7803932  | A | G | A | G | 0.0127  | 0.00878361   | 0.1667 | 0.036023 | 7  | 70738687  | 0.018371 | 0.63  | 7  | 70203673  | 0.0019 | 1.74E-11 |
| rs78116078 | C | G | C | G | 0.0086  | -0.0162642   | 0.718  | 0.936359 | 1  | 18107631  | 0.013957 | 0.24  | 1  | 18434125  | 0.0016 | 3.33E-08 |
| rs78193153 | A | G | A | G | 0.0191  | 0.00801505   | 0.0647 | 0.379443 | 7  | 72255696  | 0.007079 | 0.26  | 7  | 71720681  | 0.0029 | 2.76E-11 |
| rs7849480  | A | G | A | G | -0.0084 | -0.0139042   | 0.4353 | 0.228866 | 9  | 14648132  | 0.007863 | 0.077 | 9  | 14648130  | 0.0014 | 3.54E-09 |
| rs7855503  | C | G | C | G | 0.0088  | 0.0011205    | 0.3478 | 0.492075 | 9  | 83766723  | 0.006891 | 0.87  | 9  | 86381638  | 0.0015 | 2.39E-09 |
| rs78648104 | T | C | T | C | -0.0141 | 0.00102321   | 0.9137 | 0.814121 | 6  | 50715296  | 0.009009 | 0.91  | 6  | 50683009  | 0.0025 | 1.70E-08 |
| rs78714229 | T | C | T | C | 0.0172  | -0.0124546   | 0.9436 | 0.990394 | 6  | 25792827  | 0.035345 | 0.72  | 6  | 25793055  | 0.003  | 1.55E-08 |
| rs7875078  | A | C | A | C | -0.0078 | -0.000350856 | 0.4564 | 0.591739 | 9  | 14494847  | 0.00701  | 0.96  | 9  | 14494845  | 0.0014 | 2.72E-08 |
| rs78918150 | T | C | T | C | -0.008  | 0.00598272   | 0.6227 | 0.670269 | 2  | 116853949 | 0.007279 | 0.41  | 2  | 1.18E+08  | 0.0015 | 4.26E-08 |
| rs7894722  | T | C | T | C | 0.0085  | 0.00400321   | 0.3748 | 0.371998 | 10 | 9930083   | 0.007037 | 0.57  | 10 | 9972046   | 0.0014 | 5.41E-09 |
| rs7899270  | A | C | A | C | -0.0084 | -0.00868731  | 0.6524 | 0.692603 | 10 | 109498376 | 0.007462 | 0.24  | 10 | 1.11E+08  | 0.0015 | 1.74E-08 |
| rs7905192  | T | C | T | C | 0.0084  | -0.00244196  | 0.572  | 0.652978 | 10 | 12669950  | 0.007209 | 0.73  | 10 | 12711949  | 0.0014 | 3.14E-09 |
| rs790647   | A | C | A | C | -0.0145 | -0.00337746  | 0.2278 | 0.313881 | 10 | 105016726 | 0.007466 | 0.65  | 10 | 1.07E+08  | 0.0017 | 3.81E-18 |
| rs7920624  | A | T | A | T | 0.012   | -0.00724257  | 0.4783 | 0.435159 | 10 | 66203428  | 0.00686  | 0.29  | 10 | 67963186  | 0.0014 | 1.06E-17 |
| rs79265434 | A | G | A | G | -0.0197 | -0.00362126  | 0.8834 | 0.93804  | 7  | 24581762  | 0.014189 | 0.8   | 7  | 24621381  | 0.0022 | 1.98E-19 |
| rs7928017  | A | C | A | C | 0.0096  | -0.00411441  | 0.4341 | 0.306676 | 11 | 113578040 | 0.007417 | 0.58  | 11 | 1.13E+08  | 0.0014 | 1.43E-11 |
| rs7931563  | T | G | T | G | -0.0109 | 0.00197069   | 0.6214 | 0.581892 | 11 | 61678953  | 0.006938 | 0.78  | 11 | 61446425  | 0.0014 | 5.15E-14 |

|            |   |   |   |   |         |              |        |          |    |           |          |        |    |          |        |          |
|------------|---|---|---|---|---------|--------------|--------|----------|----|-----------|----------|--------|----|----------|--------|----------|
| rs795230   | T | C | T | C | 0.0081  | -0.00385524  | 0.4283 | 0.509846 | 11 | 30752978  | 0.006834 | 0.57   | 11 | 30774525 | 0.0014 | 9.56E-09 |
| rs7958371  | A | T | A | T | -0.0085 | 0.007758     | 0.3552 | 0.509126 | 12 | 103062306 | 0.006737 | 0.25   | 12 | 1.03E+08 | 0.0015 | 5.99E-09 |
| rs7967550  | A | G | A | G | -0.0086 | 0.00753918   | 0.3998 | 0.581412 | 12 | 91751530  | 0.006932 | 0.28   | 12 | 92145307 | 0.0014 | 1.79E-09 |
| rs7972246  | T | C | T | C | 0.011   | -0.0223223   | 0.3451 | 0.844621 | 12 | 27056395  | 0.009247 | 0.016  | 12 | 27209328 | 0.0015 | 1.01E-13 |
| rs79728014 | A | G | A | G | -0.0134 | -0.00637798  | 0.8553 | 0.959894 | 11 | 46040694  | 0.017297 | 0.71   | 11 | 46062245 | 0.002  | 2.06E-11 |
| rs7974852  | A | C | A | C | 0.0117  | -0.00897158  | 0.5235 | 0.598943 | 12 | 14358745  | 0.007049 | 0.2    | 12 | 14511679 | 0.0014 | 1.14E-16 |
| rs7977614  | A | G | A | G | -0.0134 | 0.0110165    | 0.7143 | 0.712296 | 12 | 109677481 | 0.007597 | 0.15   | 12 | 1.1E+08  | 0.0016 | 6.84E-17 |
| rs80037907 | T | C | T | C | -0.0107 | 0.024373     | 0.1589 | 0.039145 | 8  | 86158684  | 0.016861 | 0.15   | 8  | 87170913 | 0.0019 | 2.16E-08 |
| rs8009933  | A | G | A | G | 0.0088  | -0.00640379  | 0.6783 | 0.686599 | 14 | 39131008  | 0.007484 | 0.39   | 14 | 39600212 | 0.0015 | 4.72E-09 |
| rs8016504  | A | C | A | C | -0.0087 | -0.00165777  | 0.5427 | 0.704851 | 14 | 32838815  | 0.007509 | 0.83   | 14 | 33308021 | 0.0014 | 6.84E-10 |
| rs80223410 | T | C | T | C | -0.0118 | 0.0202965    | 0.1426 | 0.037464 | 12 | 55974182  | 0.01797  | 0.26   | 12 | 56367966 | 0.002  | 8.64E-09 |
| rs8030487  | A | G | A | G | 0.0085  | -0.0180918   | 0.6907 | 0.923631 | 15 | 96576365  | 0.012709 | 0.15   | 15 | 97119595 | 0.0015 | 2.52E-08 |
| rs8052523  | T | C | T | C | -0.0084 | 0.00220034   | 0.5697 | 0.37512  | 16 | 9199389   | 0.00712  | 0.76   | 16 | 9293246  | 0.0014 | 2.73E-09 |
| rs8066044  | A | G | A | G | 0.0009  | 0.00713398   | 0.2712 | 0.426513 | 17 | 1464058   | 0.006828 | 0.3    | 17 | 1367352  | 0.0016 | 1.17E-08 |
| rs8097125  | T | C | T | C | 0.0086  | -0.0195179   | 0.3802 | 0.23415  | 18 | 13005474  | 0.008097 | 0.016  | 18 | 13005473 | 0.0014 | 2.31E-09 |
| rs8103741  | A | G | A | G | -0.0108 | 0.00557654   | 0.822  | 0.757925 | 19 | 2325006   | 0.007878 | 0.48   | 19 | 2325005  | 0.0019 | 5.17E-09 |
| rs853286   | T | G | T | G | 0.0124  | -0.0071312   | 0.8921 | 0.724784 | 3  | 64299826  | 0.007716 | 0.36   | 3  | 64285502 | 0.0023 | 4.13E-08 |
| rs854796   | A | G | A | G | 0.009   | -0.00634271  | 0.6932 | 0.59414  | 17 | 18167447  | 0.006791 | 0.35   | 17 | 18070761 | 0.0015 | 4.66E-09 |
| rs868456   | A | G | A | G | 0.0089  | -0.00441778  | 0.7117 | 0.728146 | 4  | 32148407  | 0.007642 | 0.56   | 4  | 32150029 | 0.0015 | 1.07E-08 |
| rs870589   | A | T | A | T | -0.0079 | 0.00468201   | 0.4595 | 0.736551 | 17 | 33287436  | 0.0074   | 0.53   | 17 | 31614454 | 0.0014 | 2.24E-08 |
| rs884108   | A | G | A | G | -0.0094 | -0.0103153   | 0.222  | 0.118156 | 1  | 204622109 | 0.010576 | 0.33   | 1  | 2.05E+08 | 0.0017 | 2.39E-08 |
| rs891793   | C | G | C | G | -0.0099 | -0.000224895 | 0.5403 | 0.309798 | 15 | 27010874  | 0.007309 | 0.98   | 15 | 27256021 | 0.0014 | 1.87E-12 |
| rs902820   | A | T | A | T | -0.0096 | 0.000893265  | 0.4224 | 0.368636 | 8  | 142018511 | 0.007029 | 0.9    | 8  | 1.43E+08 | 0.0014 | 1.28E-11 |
| rs911149   | T | C | T | C | 0.0091  | -0.012014    | 0.2357 | 0.113112 | 20 | 59639582  | 0.01043  | 0.25   | 20 | 58214637 | 0.0017 | 3.93E-08 |
| rs912883   | T | C | T | C | 0.0087  | -0.0135554   | 0.6781 | 0.692363 | 6  | 41584302  | 0.007366 | 0.066  | 6  | 41552040 | 0.0015 | 6.20E-09 |
| rs9267677  | T | C | T | C | 0.0168  | -0.00872932  | 0.9029 | 0.90586  | 6  | 31924864  | 0.011726 | 0.46   | 6  | 31892641 | 0.0024 | 3.66E-14 |
| rs9289300  | T | C | T | C | -0.0164 | 0.024393     | 0.8412 | 0.949568 | 3  | 127426145 | 0.015181 | 0.11   | 3  | 1.27E+08 | 0.0019 | 1.00E-17 |
| rs9294770  | T | C | T | C | 0.0083  | 0.000936827  | 0.3879 | 0.25024  | 6  | 67532973  | 0.008067 | 0.91   | 6  | 68242866 | 0.0014 | 8.74E-09 |
| rs929511   | T | C | T | C | -0.016  | 0.0122482    | 0.1254 | 0.198847 | 7  | 7963386   | 0.008519 | 0.15   | 7  | 8003017  | 0.0021 | 3.91E-14 |
| rs9300612  | T | C | T | C | 0.0084  | -0.000999897 | 0.6944 | 0.432037 | 13 | 100630965 | 0.006782 | 0.88   | 13 | 1.01E+08 | 0.0015 | 3.07E-08 |
| rs9349956  | A | C | A | C | -0.0159 | -0.0406914   | 0.8211 | 0.919068 | 6  | 14718029  | 0.012455 | 0.0011 | 6  | 14718260 | 0.0018 | 4.89E-18 |
| rs9359939  | A | C | A | C | -0.0105 | -0.00484592  | 0.2431 | 0.295149 | 6  | 91423523  | 0.007587 | 0.52   | 6  | 92133241 | 0.0016 | 1.51E-10 |
| rs936496   | A | G | A | G | -0.0079 | 0.00933008   | 0.6229 | 0.289145 | 13 | 35526404  | 0.007352 | 0.2    | 13 | 36100541 | 0.0014 | 4.38E-08 |
| rs9371883  | C | G | C | G | -0.0087 | -0.00874715  | 0.643  | 0.695245 | 6  | 155323844 | 0.007487 | 0.24   | 6  | 1.56E+08 | 0.0015 | 3.42E-09 |
| rs9373363  | A | G | A | G | -0.0111 | 0.000149567  | 0.7485 | 0.714457 | 6  | 142828906 | 0.007396 | 0.98   | 6  | 1.43E+08 | 0.0016 | 5.54E-12 |
| rs9375188  | T | C | T | C | 0.0212  | 0.00507803   | 0.4847 | 0.413064 | 6  | 98107396  | 0.006943 | 0.46   | 6  | 98555272 | 0.0014 | 8.78E-52 |
| rs9375403  | C | G | C | G | 0.0126  | -0.0047718   | 0.2423 | 0.240394 | 6  | 98383760  | 0.008116 | 0.56   | 6  | 98831636 | 0.0016 | 1.66E-14 |
| rs9386110  | T | C | T | C | -0.0163 | 0.0037735    | 0.8917 | 0.899856 | 6  | 145305072 | 0.01145  | 0.74   | 6  | 1.46E+08 | 0.0023 | 5.66E-13 |
| rs9388490  | T | C | T | C | 0.0091  | 0.00241402   | 0.4437 | 0.924111 | 6  | 126383649 | 0.012161 | 0.84   | 6  | 1.27E+08 | 0.0014 | 1.15E-10 |
| rs939400   | T | G | T | G | -0.0095 | -0.00811522  | 0.3685 | 0.777137 | 2  | 50418752  | 0.007892 | 0.3    | 2  | 50645890 | 0.0015 | 7.52E-11 |
| rs9442750  | A | G | A | G | -0.0089 | 0.00688568   | 0.7439 | 0.962776 | 6  | 72176309  | 0.017322 | 0.69   | 6  | 72886012 | 0.0016 | 3.15E-08 |
| rs9446060  | A | G | A | G | 0.0077  | -0.0175404   | 0.5566 | 0.152017 | 6  | 68842379  | 0.009383 | 0.062  | 6  | 69552271 | 0.0014 | 4.33E-08 |
| rs9465509  | A | G | A | G | -0.0084 | 0.00229288   | 0.4824 | 0.40562  | 6  | 19743899  | 0.006947 | 0.74   | 6  | 19744129 | 0.0014 | 2.35E-09 |
| rs9490512  | A | G | A | G | -0.0136 | -0.01111124  | 0.4496 | 0.352546 | 6  | 98090117  | 0.007084 | 0.12   | 6  | 98537993 | 0.0014 | 4.00E-22 |
| rs9513754  | T | C | T | C | 0.0096  | -0.00686749  | 0.2906 | 0.152257 | 13 | 100391166 | 0.009569 | 0.47   | 13 | 1.01E+08 | 0.0016 | 6.64E-10 |
| rs9527662  | A | T | A | T | 0.0094  | 0.00139645   | 0.4193 | 0.065082 | 13 | 57446131  | 0.012365 | 0.91   | 13 | 58020265 | 0.0014 | 3.37E-11 |
| rs9527905  | A | G | A | G | -0.0094 | -0.00138723  | 0.5828 | 0.590298 | 13 | 58828899  | 0.006953 | 0.84   | 13 | 59403033 | 0.0014 | 4.11E-11 |
| rs9529100  | A | G | A | C | 0.0126  | -0.0120583   | 0.8609 | 0.07829  | 13 | 66587647  | 0.012507 | 0.33   | 13 | 67141932 | 0.002  | 5.82E-10 |
| rs9529146  | T | C | T | C | 0.0127  | 0.0104364    | 0.2282 | 0.473103 | 13 | 31211267  | 0.00683  | 0.13   | 13 | 31785404 | 0.0017 | 3.48E-14 |
| rs9536462  | A | G | A | G | 0.0133  | -0.0112244   | 0.1454 | 0.088617 | 13 | 53550515  | 0.011904 | 0.35   | 13 | 54124650 | 0.002  | 2.10E-11 |
| rs9545395  | T | C | T | C | 0.0138  | 0.00727703   | 0.8702 | 0.697887 | 13 | 35796833  | 0.007278 | 0.32   | 13 | 36370970 | 0.0021 | 3.81E-11 |
| rs9563168  | A | G | A | G | 0.0101  | -0.014897    | 0.2117 | 0.143132 | 13 | 53673692  | 0.00985  | 0.13   | 13 | 54247827 | 0.0017 | 4.07E-09 |
| rs9568798  | T | C | T | C | -0.0093 | 0.00216322   | 0.2912 | 0.245437 | 13 | 53040419  | 0.00797  | 0.79   | 13 | 53614554 | 0.0016 | 2.30E-09 |
| rs9611597  | A | T | A | T | -0.0107 | -0.0119594   | 0.835  | 0.988953 | 22 | 41468186  | 0.03303  | 0.72   | 22 | 41864190 | 0.0019 | 2.30E-08 |
| rs9649     | T | C | T | C | 0.0108  | -0.00879605  | 0.1749 | 0.060038 | 17 | 35723915  | 0.013963 | 0.53   | 17 | 34050934 | 0.0019 | 6.13E-09 |

|           |   |   |   |   |         |              |        |          |    |           |          |       |    |          |        |          |
|-----------|---|---|---|---|---------|--------------|--------|----------|----|-----------|----------|-------|----|----------|--------|----------|
| rs9683585 | C | G | C | G | 0.0084  | 0.00265078   | 0.5677 | 0.623199 | 4  | 2701077   | 0.007002 | 0.71  | 4  | 2702804  | 0.0014 | 2.46E-09 |
| rs969512  | A | T | A | T | -0.0106 | 0.00201089   | 0.6596 | 0.536503 | 4  | 146951590 | 0.006908 | 0.77  | 4  | 1.48E+08 | 0.0015 | 9.84E-13 |
| rs9771228 | T | C | T | C | 0.0096  | -0.00158259  | 0.6491 | 0.497839 | 7  | 32282884  | 0.006846 | 0.82  | 7  | 32322496 | 0.0015 | 5.91E-11 |
| rs977143  | A | G | A | G | 0.0085  | -0.00491365  | 0.3725 | 0.021134 | 18 | 40448201  | 0.02256  | 0.83  | 18 | 38028165 | 0.0015 | 3.95E-09 |
| rs978807  | A | G | A | G | 0.0139  | 0.00694913   | 0.1885 | 0.246638 | 18 | 39318495  | 0.00783  | 0.37  | 18 | 36898459 | 0.0018 | 9.14E-15 |
| rs981230  | T | C | T | C | 0.01    | 0.021557     | 0.4793 | 0.186119 | 5  | 59744032  | 0.008624 | 0.012 | 5  | 59039858 | 0.0014 | 1.28E-12 |
| rs981883  | A | G | A | G | 0.0099  | -0.00489204  | 0.3886 | 0.300672 | 5  | 57812162  | 0.00743  | 0.51  | 5  | 57107989 | 0.0014 | 6.67E-12 |
| rs9820604 | T | C | T | C | 0.0115  | 0.0112432    | 0.8254 | 0.614793 | 3  | 72314523  | 0.007078 | 0.11  | 3  | 72363674 | 0.0018 | 4.80E-10 |
| rs9821664 | A | G | A | G | 0.0094  | 0.0125846    | 0.2105 | 0.579251 | 3  | 127284267 | 0.006869 | 0.067 | 3  | 1.27E+08 | 0.0017 | 4.52E-08 |
| rs9853928 | T | C | T | C | -0.0127 | 0.0106199    | 0.2102 | 0.42195  | 3  | 103576540 | 0.006925 | 0.13  | 3  | 1.03E+08 | 0.0017 | 1.59E-13 |
| rs9858921 | A | G | A | G | -0.0087 | 0.00166859   | 0.4661 | 0.43804  | 3  | 161431158 | 0.006838 | 0.81  | 3  | 1.61E+08 | 0.0014 | 5.19E-10 |
| rs9859556 | T | G | T | G | 0.029   | -0.0198273   | 0.3132 | 0.06292  | 3  | 49418553  | 0.013974 | 0.16  | 3  | 49455986 | 0.0015 | 4.61E-82 |
| rs9870317 | A | C | A | C | 0.0086  | -0.000879718 | 0.3212 | 0.576609 | 3  | 182796848 | 0.006871 | 0.9   | 3  | 1.83E+08 | 0.0015 | 9.35E-09 |
| rs9877225 | T | C | T | C | 0.009   | -0.00844779  | 0.7617 | 0.661383 | 3  | 70582439  | 0.007217 | 0.24  | 3  | 70631590 | 0.0016 | 4.22E-08 |
| rs9882532 | T | C | T | C | 0.0124  | 0.0059841    | 0.6368 | 0.922671 | 3  | 16824346  | 0.012344 | 0.63  | 3  | 16865845 | 0.0015 | 2.15E-17 |
| rs9886703 | A | T | A | T | -0.0136 | -0.0104855   | 0.1671 | 0.207493 | 9  | 79631436  | 0.00836  | 0.21  | 9  | 82246351 | 0.0019 | 4.46E-13 |
| rs9888796 | T | C | T | C | 0.0113  | -0.0147549   | 0.2625 | 0.145533 | 16 | 68263686  | 0.00958  | 0.12  | 16 | 68297589 | 0.0016 | 1.20E-12 |
| rs9916901 | T | G | T | G | 0.0092  | 0.0108158    | 0.7377 | 0.492555 | 18 | 42658370  | 0.006868 | 0.12  | 18 | 40238335 | 0.0016 | 8.40E-09 |
| rs9929762 | A | G | A | G | 0.0096  | 0.00146015   | 0.5595 | 0.513689 | 16 | 78135778  | 0.0068   | 0.83  | 16 | 78169675 | 0.0014 | 1.03E-11 |
| rs9933256 | A | G | A | G | 0.0119  | -0.0138456   | 0.5558 | 0.854227 | 16 | 1196748   | 0.009645 | 0.15  | 16 | 1246748  | 0.0014 | 6.06E-17 |
| rs995698  | A | G | A | G | -0.0099 | -0.0152692   | 0.538  | 0.10951  | 9  | 85382954  | 0.01083  | 0.16  | 9  | 87997869 | 0.0014 | 1.53E-12 |
| rs9974899 | T | C | T | C | -0.0093 | 0.00175851   | 0.2538 | 0.408501 | 21 | 40634515  | 0.006886 | 0.8   | 21 | 42006441 | 0.0016 | 1.22E-08 |

Supplementary Table 2b. List of SNPs for Monthly household income and their effects on TEWL

| SNP          | effect_allele | other_allele | effect_allele | other_allele | beta.Income | beta.TEWL | eaf.Income | eaf.TEWL | chr.TEWL | pos.TEWL | se.TEWL  | pval.TEWL | chr.Income | pos.Income | se.Income | pval.Income |
|--------------|---------------|--------------|---------------|--------------|-------------|-----------|------------|----------|----------|----------|----------|-----------|------------|------------|-----------|-------------|
| chr1:2046: A | G             | A            | G             | G            | 0.01154     | 0.003883  | 0.2029     | 0.298031 | 1        | 2.05E+08 | 0.007683 | 0.61      | 1          | 204617919  | 0.002014  | 9.99E-09    |
| chr13:984: T | C             | T            | C             | C            | -0.01116    | -0.0106   | 0.4852     | 0.432517 | 13       | 98447792 | 0.00689  | 0.12      | 13         | 98447792   | 0.002024  | 3.50E-08    |
| chr17:458: C | A             | C            | A             | A            | -0.01329    | 0.03313   | 0.3822     | 0.007205 | 17       | 45898049 | 0.040709 | 0.42      | 17         | 45898049   | 0.002     | 3.04E-11    |
| chr17:461: T | A             | A            | G             | G            | -0.01333    | 0.031673  | 0.3084     | 0.006964 | 17       | 46101518 | 0.041394 | 0.44      | 17         | 46101518   | 0.002     | 2.65E-11    |
| chr17:461: T | C             | T            | A             | A            | -0.01317    | -0.0104   | 0.3144     | 0.006964 | 17       | 46142465 | 0.0414   | 0.8       | 17         | 46142465   | 0.002001  | 4.69E-11    |
| chr19:131: T | C             | T            | C             | C            | -0.01243    | -0.00289  | 0.1178     | 0.022815 | 19       | 13101211 | 0.022787 | 0.9       | 19         | 13101211   | 0.001987  | 4.04E-10    |
| chr2:1001: A | T             | A            | T             | T            | 0.011346    | -0.01354  | 0.3941     | 0.616955 | 2        | 1E+08    | 0.007068 | 0.055     | 2          | 100188811  | 0.002029  | 2.24E-08    |
| chr2:1003: C | G             | C            | G             | G            | 0.01202     | 0.002034  | 0.4534     | 0.725024 | 2        | 1E+08    | 0.007318 | 0.78      | 2          | 100322455  | 0.002025  | 2.92E-09    |
| chr2:1887: G | C             | G            | C             | C            | -0.0112     | -0.0239   | 0.02391    | 0.028098 | 2        | 1.89E+08 | 0.020917 | 0.25      | 2          | 188711617  | 0.001986  | 1.71E-08    |
| chr2:1986: A | T             | A            | T             | T            | -0.01152    | 0.000859  | 0.4745     | 0.737992 | 2        | 1.99E+08 | 0.007448 | 0.91      | 2          | 198632391  | 0.002019  | 1.16E-08    |
| chr2:2117: T | G             | T            | G             | G            | -0.01221    | -0.00606  | 0.3549     | 0.553554 | 2        | 2.12E+08 | 0.006859 | 0.38      | 2          | 211727319  | 0.002018  | 1.46E-09    |
| chr2:2118: G | A             | G            | A             | A            | 0.012051    | 0.006375  | 0.3149     | 0.371278 | 2        | 2.12E+08 | 0.006976 | 0.36      | 2          | 211813206  | 0.002015  | 2.22E-09    |
| chr3:4968: A | G             | A            | G             | G            | 0.013162    | -0.02325  | 0.2852     | 0.049472 | 3        | 49682296 | 0.015677 | 0.14      | 3          | 49682296   | 0.002018  | 6.98E-11    |
| chr3:4971: C | A             | C            | A             | A            | 0.011457    | -0.04958  | 0.1256     | 0.01561  | 3        | 49712272 | 0.027068 | 0.067     | 3          | 49712272   | 0.002017  | 1.34E-08    |
| chr5:6118: G | A             | G            | A             | A            | 0.012492    | 0.02456   | 0.2934     | 0.93756  | 5        | 61188833 | 0.013357 | 0.066     | 5          | 61188833   | 0.002009  | 5.08E-10    |
| chr5:6120: G | A             | G            | A             | A            | 0.015664    | 0.008479  | 0.4178     | 0.861431 | 5        | 61204446 | 0.009692 | 0.38      | 5          | 61204446   | 0.002021  | 9.04E-15    |
| chr5:6144: G | A             | G            | A             | A            | -0.01244    | -0.01023  | 0.3222     | 0.941403 | 5        | 61441122 | 0.014746 | 0.49      | 5          | 61441122   | 0.002006  | 5.64E-10    |
| chr6:9810: A | C             | A            | C             | C            | 0.017284    | 0.005152  | 0.4818     | 0.413305 | 6        | 98102413 | 0.006938 | 0.46      | 6          | 98102413   | 0.002025  | 1.39E-17    |
| chr7:1050: A | G             | A            | G             | G            | -0.01145    | 0.00129   | 0.4767     | 0.871278 | 7        | 1.05E+08 | 0.009368 | 0.89      | 7          | 105022415  | 0.002029  | 1.67E-08    |
| chr9:2334: A | C             | A            | C             | C            | 0.01204     | -0.00196  | 0.4412     | 0.825648 | 9        | 23349984 | 0.008758 | 0.82      | 9          | 23349984   | 0.00202   | 2.51E-09    |
| chr9:2337: G | A             | G            | A             | A            | 0.011293    | -0.00078  | 0.3679     | 0.520173 | 9        | 23378222 | 0.00676  | 0.91      | 9          | 23378222   | 0.002025  | 2.46E-08    |
| rs1042958 C  | T             | C            | T             | T            | 0.017125    | -0.00643  | 0.414      | 0.426513 | 9        | 23346852 | 0.006926 | 0.35      | 9          | 23346852   | 0.002016  | 1.98E-17    |
| rs1087222 T  | G             | T            | G             | G            | -0.0172     | -0.00441  | 0.3953     | 0.588136 | 6        | 97987249 | 0.007009 | 0.53      | 6          | 97987249   | 0.002015  | 1.40E-17    |
| rs1112382 A  | G             | A            | G             | G            | 0.011969    | 0.030112  | 0.3739     | 0.929635 | 2        | 1E+08    | 0.013099 | 0.022     | 2          | 100313672  | 0.002015  | 2.85E-09    |
| rs1194353 T  | C             | T            | C             | C            | 0.011121    | -0.02688  | 0.239      | 0.035783 | 4        | 96258935 | 0.017827 | 0.13      | 4          | 96258935   | 0.002024  | 3.92E-08    |
| rs1211914 T  | C             | T            | C             | C            | 0.012652    | 0.001192  | 0.2668     | 0.739433 | 1        | 43777612 | 0.007634 | 0.88      | 1          | 43777612   | 0.002037  | 5.24E-10    |
| rs1261488 G  | A             | G            | A             | A            | 0.01461     | -0.00074  | 0.3777     | 0.542267 | 2        | 1E+08    | 0.006725 | 0.91      | 2          | 100232879  | 0.002019  | 4.66E-13    |
| rs1296785 G  | A             | G            | A             | A            | 0.012344    | 0.003615  | 0.3308     | 0.635687 | 18       | 37558282 | 0.007326 | 0.62      | 18         | 37558282   | 0.002058  | 2.01E-09    |
| rs1300294 A  | T             | A            | T             | T            | 0.013929    | -0.00593  | 0.2672     | 0.548751 | 2        | 1E+08    | 0.006737 | 0.38      | 2          | 100185497  | 0.002022  | 5.70E-12    |
| rs1315866 T  | C             | T            | C             | C            | -0.01188    | 0.013105  | 0.4517     | 0.186599 | 5        | 60773230 | 0.008502 | 0.12      | 5          | 60773230   | 0.002022  | 4.21E-09    |
| rs1338549 G  | T             | G            | T             | T            | -0.01371    | -0.00566  | 0.4657     | 0.588617 | 6        | 97864267 | 0.006991 | 0.42      | 6          | 97864267   | 0.00202   | 1.14E-11    |
| rs1933720 C  | T             | C            | T             | T            | 0.013999    | 0.001946  | 0.3626     | 0.302594 | 6        | 97849956 | 0.007432 | 0.79      | 6          | 97849956   | 0.002014  | 3.63E-12    |
| rs2094889 C  | T             | C            | T             | T            | 0.012113    | -0.01062  | 0.3179     | 0.589097 | 9        | 23382384 | 0.006821 | 0.12      | 9          | 23382384   | 0.002018  | 1.93E-09    |
| rs2255158 G  | A             | G            | A             | A            | 0.011484    | 0.009928  | 0.3671     | 0.909942 | 20       | 3149944  | 0.011758 | 0.4       | 20         | 3149944    | 0.002016  | 1.22E-08    |
| rs2280406 A  | G             | A            | G             | G            | -0.01274    | 0.00774   | 0.4837     | 0.154179 | 3        | 49904003 | 0.009527 | 0.42      | 3          | 49904003   | 0.002026  | 3.22E-10    |
| rs2332719 G  | A             | G            | A             | A            | -0.01333    | 7.41E-05  | 0.2784     | 0.486551 | 3        | 1.24E+08 | 0.006863 | 0.99      | 3          | 123994119  | 0.002068  | 1.16E-10    |
| rs2388148 T  | C             | T            | C             | C            | 0.011448    | 0.001305  | 0.4312     | 0.301393 | 6        | 97785319 | 0.007555 | 0.86      | 6          | 97785319   | 0.002018  | 1.41E-08    |
| rs2503776 T  | A             | T            | A             | A            | -0.0137     | -0.0108   | 0.4769     | 0.354947 | 6        | 98072650 | 0.007047 | 0.13      | 6          | 98072650   | 0.002021  | 1.21E-11    |
| rs2563332 T  | C             | T            | C             | C            | -0.01156    | 0.0106    | 0.2075     | 0.143852 | 5        | 1.41E+08 | 0.009794 | 0.28      | 5          | 140646169  | 0.002017  | 9.90E-09    |
| rs2855855 C  | T             | C            | T             | T            | 0.011223    | -0.00277  | 0.1066     | 0.15658  | 6        | 1.14E+08 | 0.009216 | 0.76      | 6          | 113863071  | 0.002046  | 4.11E-08    |
| rs2889678 G  | T             | G            | T             | T            | 0.011228    | -0.00673  | 0.2254     | 0.721662 | 4        | 1.32E+08 | 0.007679 | 0.38      | 4          | 131729441  | 0.002038  | 3.60E-08    |
| rs306755 C   | T             | C            | T             | T            | 0.011925    | 0.001939  | 0.4714     | 0.556916 | 20       | 3119106  | 0.006898 | 0.78      | 20         | 3119106    | 0.002024  | 3.82E-09    |
| rs32940 C    | T             | C            | T             | T            | 0.011072    | 0.004581  | 0.2976     | 0.700768 | 5        | 1.42E+08 | 0.007507 | 0.54      | 5          | 141752719  | 0.002012  | 3.73E-08    |
| rs3619810 A  | G             | A            | G             | G            | -0.01184    | 0.002232  | 0.3879     | 0.080932 | 5        | 61263329 | 0.012091 | 0.85      | 5          | 61263329   | 0.002018  | 4.47E-09    |

|           |   |   |   |   |          |          |        |          |    |          |          |       |    |           |          |          |
|-----------|---|---|---|---|----------|----------|--------|----------|----|----------|----------|-------|----|-----------|----------|----------|
| rs37976   | T | C | T | C | 0.011976 | -0.00067 | 0.4404 | 0.564841 | 7  | 7975326  | 0.006851 | 0.92  | 7  | 7975326   | 0.002022 | 3.14E-09 |
| rs4257287 | G | A | G | A | -0.0126  | -0.00742 | 0.1025 | 0.011768 | 18 | 55076600 | 0.031405 | 0.81  | 18 | 55076600  | 0.002033 | 5.80E-10 |
| rs4443016 | G | C | G | C | 0.012947 | 0.002363 | 0.4941 | 0.603026 | 2  | 1E+08    | 0.006926 | 0.73  | 2  | 100260166 | 0.002016 | 1.36E-10 |
| rs4583848 | C | A | C | A | -0.01504 | -0.00737 | 0.499  | 0.25048  | 5  | 61305607 | 0.007833 | 0.35  | 5  | 61305607  | 0.00203  | 1.29E-13 |
| rs4587178 | C | T | C | T | -0.0133  | -0.0016  | 0.3846 | 0.396974 | 6  | 97974115 | 0.007033 | 0.82  | 6  | 97974115  | 0.002027 | 5.35E-11 |
| rs4799936 | A | G | A | G | 0.011652 | -0.00358 | 0.2871 | 0.550913 | 18 | 37524865 | 0.00695  | 0.61  | 18 | 37524865  | 0.002079 | 2.07E-08 |
| rs5746822 | C | T | C | T | 0.01201  | -0.00855 | 0.394  | 0.391931 | 5  | 60799177 | 0.006829 | 0.21  | 5  | 60799177  | 0.002017 | 2.62E-09 |
| rs5977930 | C | T | C | T | -0.01133 | -0.01081 | 0.4123 | 0.323247 | 2  | 2.12E+08 | 0.007377 | 0.14  | 2  | 211778050 | 0.00202  | 2.06E-08 |
| rs6218302 | T | G | T | G | -0.01137 | -0.01385 | 0.3147 | 0.061479 | 2  | 2.12E+08 | 0.013953 | 0.32  | 2  | 211766758 | 0.002008 | 1.48E-08 |
| rs6236619 | G | C | G | C | 0.013793 | -0.00252 | 0.3414 | 0.3756   | 5  | 61188108 | 0.007015 | 0.72  | 5  | 61188108  | 0.002011 | 7.00E-12 |
| rs6477496 | T | C | T | C | 0.011258 | -0.0171  | 0.1887 | 0.023775 | 9  | 96494130 | 0.022108 | 0.44  | 9  | 96494130  | 0.002028 | 2.85E-08 |
| rs6699397 | G | A | G | A | -0.0122  | 0.00609  | 0.3672 | 0.39121  | 1  | 90746659 | 0.007082 | 0.39  | 1  | 90746659  | 0.002021 | 1.59E-09 |
| rs6931604 | T | C | T | C | 0.015038 | 0.016696 | 0.4019 | 0.579251 | 6  | 98130339 | 0.006899 | 0.016 | 6  | 98130339  | 0.002036 | 1.53E-13 |
| rs6933464 | T | C | T | C | 0.011294 | 0.006809 | 0.2832 | 0.412584 | 6  | 98293860 | 0.006814 | 0.32  | 6  | 98293860  | 0.002012 | 1.97E-08 |
| rs7159268 | T | C | T | C | 0.011341 | -0.02196 | 0.2554 | 0.018972 | 5  | 60825411 | 0.023908 | 0.36  | 5  | 60825411  | 0.002006 | 1.56E-08 |
| rs7566675 | A | G | G | T | -0.01385 | 0.028852 | 0.222  | 0.006964 | 17 | 46012782 | 0.041398 | 0.49  | 17 | 46012782  | 0.002001 | 4.56E-12 |
| rs784256  | A | G | A | G | -0.01154 | 0.00835  | 0.1814 | 0.982949 | 18 | 55731395 | 0.025324 | 0.74  | 18 | 55731395  | 0.002005 | 8.58E-09 |
| rs9517310 | T | C | T | C | 0.011125 | 0.006828 | 0.3107 | 0.173391 | 13 | 98448220 | 0.009026 | 0.45  | 13 | 98448220  | 0.002009 | 3.09E-08 |
| rs9653442 | T | C | T | C | 0.011995 | -0.01508 | 0.4652 | 0.60975  | 2  | 1E+08    | 0.006904 | 0.029 | 2  | 100208905 | 0.002029 | 3.38E-09 |



Supplementary Table 2c. List of SNPs for Diabetes Mellitus(DM) and their effects on TEWL

| SNP         | effect_alle | other_allele | effect_alle | other_allele | beta.DM  | beta.TEWL | eaf.DM | eaf.TEWL | chr.TEWL | pos.TEWL | se.TEWL  | pval.TEWL | chr.DM | pos.DM   | se.DM    | pval.DM  |
|-------------|-------------|--------------|-------------|--------------|----------|-----------|--------|----------|----------|----------|----------|-----------|--------|----------|----------|----------|
| chr1:1199:T | C           | T            | C           |              | 0.086178 | 0.01411   | 0.1089 | 0.044909 | 1        | 1.2E+08  | 0.016405 | 0.39      | 1      | 1.21E+08 | 0.009363 | 1.72E-20 |
| chr1:1779:C | A           | C            | A           |              | 0.04879  | -0.00414  | 0.1981 | 0.128963 | 1        | 1.78E+08 | 0.010313 | 0.69      | 1      | 1.78E+08 | 0.007255 | 8.75E-12 |
| chr1:2051:G | C           | G            | C           |              | 0.039221 | 0.004602  | 0.4417 | 0.925312 | 1        | 2.05E+08 | 0.012937 | 0.72      | 1      | 2.05E+08 | 0.004906 | 6.50E-16 |
| chr1:2064:C | G           | C            | G           |              | 0.039221 | -0.00226  | 0.494  | 0.767291 | 1        | 2.06E+08 | 0.00798  | 0.78      | 1      | 2.07E+08 | 0.007395 | 5.67E-08 |
| chr1:2355:G | A           | G            | A           |              | 0.039221 | 0.000999  | 0.6322 | 0.681316 | 1        | 2.36E+08 | 0.007227 | 0.89      | 1      | 2.36E+08 | 0.007324 | 4.28E-08 |
| chr10:112:T | C           | T            | C           |              | 0.314811 | 0.008164  | 0.295  | 0.052354 | 10       | 1.13E+08 | 0.014522 | 0.57      | 10     | 1.15E+08 | 0.007449 | 0        |
| chr10:113:A | G           | A            | G           |              | 0.04879  | 0.005236  | 0.7162 | 0.971662 | 10       | 1.13E+08 | 0.020605 | 0.8       | 10     | 1.15E+08 | 0.007255 | 8.75E-12 |
| chr10:791:G | C           | G            | C           |              | 0.067659 | 0.00309   | 0.533  | 0.663545 | 10       | 79193069 | 0.007273 | 0.67      | 10     | 80952826 | 0.00712  | 1.02E-21 |
| chr11:173:C | T           | C            | T           |              | 0.067659 | -0.00428  | 0.3624 | 0.360711 | 11       | 17386857 | 0.007089 | 0.55      | 11     | 17408404 | 0.00712  | 1.02E-21 |
| chr11:273:A | G           | A            | G           |              | 0.04879  | -0.01087  | 0.6896 | 0.780259 | 11       | 2734318  | 0.00824  | 0.19      | 11     | 2755548  | 0.007324 | 1.35E-11 |
| chr11:283:C | A           | C            | A           |              | 0.113329 | -0.00273  | 0.426  | 0.341739 | 11       | 2835964  | 0.007277 | 0.71      | 11     | 2857194  | 0.006803 | 1.32E-62 |
| chr11:324:T | C           | T            | C           |              | 0.039221 | 0.006937  | 0.1614 | 0.09318  | 11       | 32439327 | 0.01167  | 0.55      | 11     | 32460873 | 0.009813 | 3.21E-05 |
| chr11:932:C | T           | C            | T           |              | 0.039221 | -0.00352  | 0.7057 | 0.82829  | 11       | 93280365 | 0.009159 | 0.7       | 11     | 93013531 | 0.007324 | 4.28E-08 |
| chr12:117:A | G           | A            | G           |              | 0.058269 | 7.02E-05  | 0.1438 | 0.208213 | 12       | 1.18E+08 | 0.008518 | 0.99      | 12     | 1.18E+08 | 0.009628 | 7.14E-10 |
| chr12:118:A | T           | A            | T           |              | 0.039221 | 0.001813  | 0.8278 | 0.877522 | 12       | 1.18E+08 | 0.010661 | 0.86      | 12     | 1.18E+08 | 0.009813 | 3.21E-05 |
| chr12:127:G | T           | G            | T           |              | 0.04879  | -0.00415  | 0.235  | 0.075889 | 12       | 12718165 | 0.012777 | 0.75      | 12     | 12871099 | 0.007324 | 1.35E-11 |
| chr12:658:T | A           | T            | A           |              | 0.09531  | 0.0022    | 0.1042 | 0.106388 | 12       | 65827280 | 0.011199 | 0.84      | 12     | 66221060 | 0.011545 | 7.56E-17 |
| chr13:109:G | A           | G            | A           |              | 0.039221 | -0.00156  | 0.6685 | 0.550672 | 13       | 1.1E+08  | 0.00684  | 0.82      | 13     | 1.1E+08  | 0.007395 | 5.67E-08 |
| chr14:103:G | T           | G            | T           |              | 0.039221 | -0.00465  | 0.6532 | 0.853746 | 14       | 1.03E+08 | 0.009681 | 0.63      | 14     | 1.04E+08 | 0.007395 | 5.67E-08 |
| chr14:228:G | C           | G            | C           |              | 0.039221 | 0.032606  | 0.228  | 0.050672 | 14       | 22819726 | 0.015459 | 0.035     | 14     | 23288935 | 0.007324 | 4.28E-08 |
| chr15:570:G | A           | G            | T           |              | 0.09531  | 0.051691  | 0.0369 | 0.006724 | 15       | 57071996 | 0.039349 | 0.19      | 15     | 57456802 | 0.016313 | 2.57E-09 |
| chr15:621:G | C           | G            | C           |              | 0.04879  | 0.007195  | 0.5663 | 0.664505 | 15       | 62102065 | 0.007235 | 0.32      | 15     | 62394264 | 0.007324 | 1.35E-11 |
| chr15:756:G | T           | G            | T           |              | 0.04879  | 0.010789  | 0.7586 | 0.644813 | 15       | 75639788 | 0.007115 | 0.13      | 15     | 75932129 | 0.007324 | 1.35E-11 |
| chr15:898:T | C           | T            | C           |              | 0.067659 | -0.00041  | 0.2672 | 0.20389  | 15       | 89880061 | 0.008375 | 0.96      | 15     | 90423293 | 0.007186 | 2.37E-21 |
| chr16:245:T | C           | T            | C           |              | 0.058269 | 0.005125  | 0.8246 | 0.585975 | 16       | 245796   | 0.007051 | 0.47      | 16     | 295795   | 0.007186 | 2.57E-16 |
| chr16:815:T | C           | T            | C           |              | 0.04879  | -0.00035  | 0.2996 | 0.407781 | 16       | 81501185 | 0.007059 | 0.96      | 16     | 81534790 | 0.007255 | 8.75E-12 |
| chr17:377:T | A           | T            | A           |              | 0.076961 | -0.01167  | 0.4808 | 0.245917 | 17       | 37739961 | 0.007851 | 0.14      | 17     | 36099952 | 0.007054 | 5.14E-28 |
| chr17:392:G | C           | G            | C           |              | 0.04879  | -0.00634  | 0.1568 | 0.386167 | 17       | 3924792  | 0.006963 | 0.36      | 17     | 3828086  | 0.009719 | 2.58E-07 |
| chr17:988:C | G           | C            | G           |              | 0.039221 | 0.047094  | 0.3238 | 0.016331 | 17       | 9881870  | 0.025427 | 0.064     | 17     | 9785187  | 0.004906 | 6.50E-16 |
| chr18:603:C | A           | C            | A           |              | 0.139762 | -0.06031  | 0.9763 | 0.995677 | 18       | 60389333 | 0.052461 | 0.25      | 18     | 58056566 | 0.022197 | 1.52E-10 |
| chr18:631:T | C           | T            | C           |              | 0.04879  | -0.01238  | 0.6142 | 0.568684 | 18       | 63178651 | 0.006954 | 0.075     | 18     | 60845884 | 0.004859 | 5.05E-24 |
| chr19:192:T | A           | T            | A           |              | 0.09531  | 0.003409  | 0.0769 | 0.086936 | 19       | 19277691 | 0.012168 | 0.78      | 19     | 19388500 | 0.011651 | 1.41E-16 |
| chr19:333:C | G           | C            | G           |              | 0.039221 | 0.000139  | 0.5226 | 0.583573 | 19       | 33399932 | 0.006809 | 0.98      | 19     | 33890838 | 0.007395 | 5.67E-08 |
| chr19:521:A | G           | A            | G           |              | 0.076961 | -0.0065   | 0.0371 | 0.006484 | 19       | 5212300  | 0.042911 | 0.88      | 19     | 5224998  | 0.018905 | 2.34E-05 |
| chr19:790:A | G           | A            | G           |              | 0.04879  | 2.71E-05  | 0.3902 | 0.413305 | 19       | 7905750  | 0.007035 | 1         | 19     | 7970635  | 0.007324 | 1.35E-11 |
| chr2:2542:G | T           | G            | T           |              | 0.039221 | 0.012029  | 0.7314 | 0.963257 | 2        | 25420352 | 0.016992 | 0.48      | 2      | 25643221 | 0.004906 | 6.50E-16 |
| chr2:4320:A | G           | A            | G           |              | 0.039221 | -0.00155  | 0.5007 | 0.691402 | 2        | 43203301 | 0.007627 | 0.84      | 2      | 43430440 | 0.007395 | 5.67E-08 |
| chr2:5908:G | A           | G            | A           |              | 0.039221 | 0.015115  | 0.392  | 0.361191 | 2        | 59080590 | 0.007092 | 0.033     | 2      | 59307725 | 0.007395 | 5.67E-08 |
| chr2:6512:G | A           | G            | A           |              | 0.067659 | -0.00342  | 0.3038 | 0.333333 | 2        | 65128136 | 0.007119 | 0.63      | 2      | 65355270 | 0.011979 | 8.11E-09 |
| chr20:340:A | G           | A            | G           |              | 0.039221 | 0.015973  | 0.6572 | 0.837416 | 20       | 34008898 | 0.009299 | 0.086     | 20     | 32596704 | 0.007324 | 4.28E-08 |

|            |   |   |   |   |          |           |        |          |    |          |          |       |    |          |          |          |
|------------|---|---|---|---|----------|-----------|--------|----------|----|----------|----------|-------|----|----------|----------|----------|
| chr22:3019 | G | A | G | A | 0.086178 | 0.005258  | 0.9136 | 0.876561 | 22 | 30194037 | 0.010516 | 0.62  | 22 | 30609554 | 0.011758 | 1.16E-13 |
| chr22:3207 | C | T | C | T | 0.067659 | -0.01621  | 0.9117 | 0.987512 | 22 | 32079891 | 0.031091 | 0.6   | 22 | 32348841 | 0.011979 | 8.11E-09 |
| chr22:4996 | C | T | C | T | 0.039221 | -0.0006   | 0.275  | 0.258165 | 22 | 49963202 | 0.007794 | 0.94  | 22 | 50356850 | 0.007395 | 5.67E-08 |
| chr3:1244  | G | T | G | T | 0.058269 | 0.001585  | 0.4249 | 0.888329 | 3  | 12447843 | 0.010501 | 0.88  | 3  | 12489342 | 0.007255 | 4.79E-16 |
| chr3:1252  | T | C | T | C | 0.039221 | -3.96E-05 | 0.4651 | 0.231508 | 3  | 1.25E+08 | 0.008141 | 1     | 3  | 1.25E+08 | 0.004906 | 6.50E-16 |
| chr3:1840  | A | C | A | C | 0.039221 | 0.00884   | 0.4538 | 0.168348 | 3  | 1.84E+08 | 0.00892  | 0.32  | 3  | 1.84E+08 | 0.007395 | 5.67E-08 |
| chr3:1869  | A | G | A | G | 0.076961 | -0.00597  | 0.0576 | 0.06316  | 3  | 1.87E+08 | 0.014126 | 0.67  | 3  | 1.87E+08 | 0.014176 | 2.83E-08 |
| chr3:1880  | C | T | C | T | 0.058269 | -0.00804  | 0.6104 | 0.971662 | 3  | 1.88E+08 | 0.01967  | 0.68  | 3  | 1.88E+08 | 0.007186 | 2.57E-16 |
| chr4:1361  | A | C | A | C | 0.039221 | -0.00219  | 0.4457 | 0.862392 | 4  | 1.36E+08 | 0.00968  | 0.82  | 4  | 1.37E+08 | 0.007395 | 5.67E-08 |
| chr4:1525  | T | A | T | A | 0.058269 | -0.01299  | 0.7045 | 0.502642 | 4  | 1.53E+08 | 0.006783 | 0.056 | 4  | 1.54E+08 | 0.007255 | 4.79E-16 |
| chr4:1567  | C | A | C | A | 0.039221 | -0.00892  | 0.6767 | 0.70341  | 4  | 1.57E+08 | 0.007419 | 0.23  | 4  | 1.58E+08 | 0.007324 | 4.28E-08 |
| chr4:6300  | A | G | A | G | 0.04879  | 0.011821  | 0.7087 | 0.982709 | 4  | 6300792  | 0.026207 | 0.65  | 4  | 6302519  | 0.009719 | 2.58E-07 |
| chr4:6305  | C | G | C | G | 0.058269 | 0.016561  | 0.588  | 0.896494 | 4  | 6305036  | 0.010938 | 0.13  | 4  | 6306763  | 0.009628 | 7.14E-10 |
| chr5:1340  | A | G | A | G | 0.029559 | -0.0154   | 0.7028 | 0.754323 | 5  | 1.34E+08 | 0.007994 | 0.054 | 5  | 1.33E+08 | 0.007395 | 3.20E-05 |
| chr5:1476  | C | G | C | G | 0.067659 | -0.0114   | 0.904  | 0.591258 | 5  | 14767983 | 0.006894 | 0.098 | 5  | 14768092 | 0.011979 | 8.11E-09 |
| chr5:5411  | C | A | C | A | 0.039221 | -0.00252  | 0.6909 | 0.725024 | 5  | 54116790 | 0.007515 | 0.74  | 5  | 53412620 | 0.004906 | 6.50E-16 |
| chr5:7570  | T | C | T | C | 0.04879  | 0.003833  | 0.6053 | 0.433718 | 5  | 75707853 | 0.006927 | 0.58  | 5  | 75003678 | 0.007255 | 8.75E-12 |
| chr5:8728  | G | A | G | A | 0.039221 | 0.003594  | 0.2585 | 0.465418 | 5  | 87281535 | 0.006777 | 0.6   | 5  | 86577352 | 0.007324 | 4.28E-08 |
| chr6:2067  | G | A | G | A | 0.139762 | -0.00063  | 0.2735 | 0.435639 | 6  | 20679478 | 0.006845 | 0.93  | 6  | 20679709 | 0.008874 | 3.46E-56 |
| chr6:5082  | C | A | C | A | 0.058269 | -0.00191  | 0.1844 | 0.232229 | 6  | 50821065 | 0.008161 | 0.82  | 6  | 50788778 | 0.009628 | 7.14E-10 |
| chr6:7035  | C | A | C | A | 0.029559 | 0.013621  | 0.4085 | 0.910903 | 6  | 7035501  | 0.011772 | 0.25  | 6  | 7035734  | 0.007395 | 3.20E-05 |
| chr7:1178  | A | C | A | C | 0.039221 | 0.00165   | 0.3127 | 0.164265 | 7  | 1.18E+08 | 0.009183 | 0.86  | 7  | 1.17E+08 | 0.007324 | 4.28E-08 |
| chr7:1303  | C | A | C | A | 0.029559 | 0.004418  | 0.3271 | 0.363112 | 7  | 1.3E+08  | 0.007088 | 0.53  | 7  | 1.3E+08  | 0.004954 | 1.21E-09 |
| chr7:1571  | G | C | G | C | 0.058269 | 0.00313   | 0.6729 | 0.574688 | 7  | 1.57E+08 | 0.006971 | 0.65  | 7  | 1.57E+08 | 0.004813 | 4.93E-34 |
| chr8:1091  | C | G | C | G | 0.039221 | -0.00441  | 0.5342 | 0.475264 | 8  | 1.09E+08 | 0.006911 | 0.52  | 8  | 1.1E+08  | 0.007395 | 5.67E-08 |
| chr8:3100  | T | C | T | C | 0.039221 | 0.009868  | 0.3135 | 0.067483 | 8  | 31006422 | 0.012531 | 0.43  | 8  | 30863938 | 0.007324 | 4.28E-08 |
| chr8:4165  | C | A | C | A | 0.067659 | 0.007176  | 0.8292 | 0.864553 | 8  | 41651058 | 0.010157 | 0.48  | 8  | 41508577 | 0.009538 | 6.52E-13 |
| chr9:2066  | C | T | C | T | 0.039221 | 0.013625  | 0.8431 | 0.767291 | 9  | 20662704 | 0.00818  | 0.096 | 9  | 20662703 | 0.007324 | 4.28E-08 |
| chr9:2215  | A | C | A | C | 0.029559 | -0.00142  | 0.6599 | 0.697646 | 9  | 22157909 | 0.007607 | 0.85  | 9  | 22157908 | 0.007395 | 3.20E-05 |
| chr9:3965  | A | C | A | C | 0.029559 | -0.00209  | 0.4906 | 0.485351 | 9  | 3965689  | 0.006778 | 0.76  | 9  | 3965689  | 0.004954 | 1.21E-09 |
| rs1005752  | A | C | A | C | 0.076961 | 0.014514  | 0.7154 | 0.37464  | 15 | 77525786 | 0.007095 | 0.041 | 15 | 77818128 | 0.007054 | 5.14E-28 |
| rs1009663  | C | T | C | T | 0.067659 | 0.009386  | 0.8766 | 0.884726 | 8  | 19973410 | 0.010885 | 0.39  | 8  | 19830921 | 0.009538 | 6.52E-13 |
| rs1009761  | T | C | T | C | 0.039221 | 0.008129  | 0.4847 | 0.271374 | 8  | 94949398 | 0.007553 | 0.28  | 8  | 95961626 | 0.007324 | 4.28E-08 |
| rs1019353  | T | G | T | G | 0.039221 | 0.008436  | 0.6103 | 0.423391 | 2  | 58753929 | 0.006867 | 0.22  | 2  | 58981064 | 0.007395 | 5.67E-08 |
| rs1019525  | T | C | T | C | 0.067659 | 0.000905  | 0.5864 | 0.884726 | 2  | 1.65E+08 | 0.010655 | 0.93  | 2  | 1.66E+08 | 0.004768 | 5.36E-46 |
| rs1022806  | T | C | T | C | 0.067659 | 0.013779  | 0.5373 | 0.705331 | 7  | 15023944 | 0.00743  | 0.064 | 7  | 15063569 | 0.00712  | 1.02E-21 |
| rs1030574  | A | G | A | G | 0.24686  | 0.004906  | 0.0145 | 0.098463 | 1  | 1.51E+08 | 0.011433 | 0.67  | 1  | 1.51E+08 | 0.0538   | 2.23E-06 |
| rs1040643  | A | G | A | G | 0.04879  | 0.004351  | 0.5625 | 0.635207 | 19 | 45653761 | 0.007074 | 0.54  | 19 | 46157019 | 0.004859 | 5.05E-24 |
| rs1042725  | T | C | T | C | 0.04879  | -0.00139  | 0.4902 | 0.826609 | 12 | 65964567 | 0.009109 | 0.88  | 12 | 66358347 | 0.007324 | 1.35E-11 |
| rs1046914  | G | A | G | A | 0.029559 | 0.011398  | 0.4849 | 0.566042 | 18 | 63001037 | 0.006981 | 0.1   | 18 | 60668270 | 0.004954 | 1.21E-09 |
| rs1061810  | A | C | A | C | 0.04879  | -0.00031  | 0.288  | 0.286984 | 11 | 43856384 | 0.007626 | 0.97  | 11 | 43877934 | 0.007255 | 8.75E-12 |
| rs1075039  | A | G | A | G | 0.04879  | -0.00325  | 0.2817 | 0.21806  | 11 | 1.28E+08 | 0.008143 | 0.69  | 11 | 1.28E+08 | 0.007255 | 8.75E-12 |

|             |   |   |   |          |          |        |          |    |          |          |        |    |          |          |           |
|-------------|---|---|---|----------|----------|--------|----------|----|----------|----------|--------|----|----------|----------|-----------|
| rs1075728 T | C | T | C | 0.10436  | -0.00358 | 0.4298 | 0.584054 | 9  | 22134173 | 0.006955 | 0.61   | 9  | 22134172 | 0.009194 | 3.66E-30  |
| rs1081166 G | A | G | A | 0.239017 | -0.00786 | 0.8282 | 0.615754 | 9  | 22134069 | 0.007021 | 0.26   | 9  | 22134068 | 0.010084 | 1.73E-124 |
| rs1083096 G | C | G | C | 0.09531  | 0.000667 | 0.2765 | 0.445245 | 11 | 92975544 | 0.006944 | 0.92   | 11 | 92708710 | 0.006926 | 2.20E-43  |
| rs1084299 C | T | C | T | 0.076961 | -0.00643 | 0.8054 | 0.79659  | 12 | 27812217 | 0.008387 | 0.44   | 12 | 27965150 | 0.00712  | 1.55E-27  |
| rs1084895 C | T | C | T | 0.039221 | -0.00193 | 0.8039 | 0.980548 | 12 | 3921938  | 0.024529 | 0.94   | 12 | 4031104  | 0.007324 | 4.28E-08  |
| rs1088210 T | C | T | C | 0.058269 | -0.01064 | 0.5872 | 0.305716 | 10 | 92702670 | 0.007579 | 0.16   | 10 | 94462427 | 0.009628 | 7.14E-10  |
| rs1089382 T | C | T | C | 0.058269 | -0.00436 | 0.8533 | 0.71926  | 11 | 1.28E+08 | 0.007783 | 0.57   | 11 | 1.28E+08 | 0.009628 | 7.14E-10  |
| rs1093839 A | G | A | G | 0.04879  | 0.00419  | 0.4289 | 0.264649 | 4  | 45184122 | 0.007607 | 0.58   | 4  | 45186139 | 0.007324 | 1.35E-11  |
| rs10962 C   | G | C | G | 0.04879  | 0.017002 | 0.2257 | 0.252882 | 17 | 37686448 | 0.007863 | 0.031  | 17 | 36046451 | 0.009719 | 2.58E-07  |
| rs1097443 C | A | C | A | 0.04879  | 0.003686 | 0.3567 | 0.39097  | 9  | 4291928  | 0.006888 | 0.59   | 9  | 4291928  | 0.007255 | 8.75E-12  |
| rs1104259 G | T | G | T | 0.039221 | 0.001336 | 0.6649 | 0.50072  | 11 | 2097630  | 0.007008 | 0.85   | 11 | 2118860  | 0.004906 | 6.50E-16  |
| rs1106302 C | T | C | T | 0.058269 | 0.002384 | 0.18   | 0.180115 | 12 | 4191006  | 0.009086 | 0.79   | 12 | 4300172  | 0.007255 | 4.79E-16  |
| rs1106529 A | G | A | G | 0.058269 | 0.006964 | 0.0754 | 0.007925 | 12 | 1.21E+08 | 0.038887 | 0.86   | 12 | 1.21E+08 | 0.011979 | 5.74E-07  |
| rs1107033 A | G | A | G | 0.04879  | 0.001785 | 0.3578 | 0.178674 | 15 | 41517007 | 0.008695 | 0.84   | 15 | 41809205 | 0.004859 | 5.05E-24  |
| rs1112718 A | G | A | G | 0.058269 | 0.003003 | 0.5984 | 0.170749 | 10 | 92719350 | 0.008916 | 0.74   | 10 | 94479107 | 0.012092 | 7.23E-07  |
| rs1113782 C | G | C | G | 0.039221 | -0.00382 | 0.5751 | 0.68684  | 9  | 78744197 | 0.007461 | 0.61   | 9  | 81359113 | 0.007395 | 5.67E-08  |
| rs1125765 T | C | T | C | 0.086178 | 0.001229 | 0.2184 | 0.506004 | 10 | 12265895 | 0.006706 | 0.85   | 10 | 12307894 | 0.00699  | 3.14E-35  |
| rs1127215 C | T | C | T | 0.04879  | -0.02097 | 0.5838 | 0.722622 | 1  | 1.17E+08 | 0.007606 | 0.0058 | 1  | 1.18E+08 | 0.004859 | 5.05E-24  |
| rs1144475 T | C | T | C | 0.058269 | -0.02083 | 0.0839 | 0.009366 | 4  | 52340927 | 0.034089 | 0.54   | 4  | 53207093 | 0.012092 | 7.23E-07  |
| rs1149606 T | C | T | C | 0.076961 | 0.065772 | 0.8181 | 0.985351 | 7  | 1.03E+08 | 0.027857 | 0.018  | 7  | 1.02E+08 | 0.014176 | 2.83E-08  |
| rs1164243 G | C | G | C | 0.039221 | -0.00189 | 0.399  | 0.431076 | 16 | 30034468 | 0.006938 | 0.79   | 16 | 30045789 | 0.004906 | 6.50E-16  |
| rs1165749 G | T | G | T | 0.058269 | -0.02154 | 0.1002 | 0.033381 | 17 | 67652311 | 0.019171 | 0.26   | 17 | 65648427 | 0.009628 | 7.14E-10  |
| rs1167610 C | G | T | C | 0.19062  | -0.00418 | 0.9818 | 0.01561  | 10 | 1.13E+08 | 0.027455 | 0.88   | 10 | 1.15E+08 | 0.02532  | 2.57E-14  |
| rs1168005 A | G | A | G | 0.058269 | 0.013279 | 0.863  | 0.880403 | 2  | 16393401 | 0.010616 | 0.21   | 2  | 16574669 | 0.009628 | 7.14E-10  |
| rs1168868 G | C | G | C | 0.04879  | 0.005598 | 0.7278 | 0.92243  | 2  | 1.21E+08 | 0.012819 | 0.66   | 2  | 1.21E+08 | 0.007324 | 1.35E-11  |
| rs1168893 C | G | C | G | 0.039221 | 0.00058  | 0.8494 | 0.82781  | 2  | 1.21E+08 | 0.008993 | 0.95   | 2  | 1.21E+08 | 0.009813 | 3.21E-05  |
| rs1169130 C | T | C | T | 0.039221 | 0.019661 | 0.83   | 0.981508 | 7  | 44325950 | 0.025398 | 0.44   | 7  | 44365549 | 0.009813 | 3.21E-05  |
| rs1169980 C | T | C | T | 0.039221 | 0.000194 | 0.5359 | 0.438761 | 20 | 50215598 | 0.00685  | 0.98   | 20 | 48832135 | 0.007324 | 4.28E-08  |
| rs1170806 A | G | A | G | 0.086178 | 0.010881 | 0.7723 | 0.973823 | 3  | 1.23E+08 | 0.019372 | 0.57   | 3  | 1.23E+08 | 0.00699  | 3.14E-35  |
| rs1170907 G | A | G | A | 0.131028 | 0.016222 | 0.8765 | 0.95341  | 3  | 12295008 | 0.015736 | 0.3    | 3  | 12336507 | 0.01124  | 1.05E-31  |
| rs1171795 G | T | G | T | 0.039221 | 0.002197 | 0.6208 | 0.826849 | 3  | 1.86E+08 | 0.008914 | 0.81   | 3  | 1.86E+08 | 0.009813 | 3.21E-05  |
| rs1175902 G | A | G | A | 0.067659 | -0.005   | 0.2321 | 0.467819 | 6  | 1.26E+08 | 0.006687 | 0.45   | 6  | 1.27E+08 | 0.007186 | 2.37E-21  |
| rs1178699 A | C | A | C | 0.029559 | 0.008333 | 0.644  | 0.79683  | 8  | 94672919 | 0.008586 | 0.33   | 8  | 95685147 | 0.004954 | 1.21E-09  |
| rs1182001 T | C | T | C | 0.14842  | -0.03644 | 0.9733 | 0.986551 | 11 | 69633990 | 0.029972 | 0.22   | 11 | 69448758 | 0.019888 | 4.24E-14  |
| rs1184287 G | T | G | T | 0.039221 | -0.01666 | 0.7345 | 0.856628 | 13 | 30468315 | 0.009753 | 0.088  | 13 | 31042452 | 0.007324 | 4.28E-08  |
| rs1192670 C | T | C | T | 0.239017 | -0.00715 | 0.6262 | 0.597983 | 3  | 46884049 | 0.007035 | 0.31   | 3  | 46925539 | 0.042112 | 6.91E-09  |
| rs1196726 G | C | G | C | 0.039221 | 0.01173  | 0.4855 | 0.59438  | 6  | 43792590 | 0.006941 | 0.091  | 6  | 43760327 | 0.004906 | 6.50E-16  |
| rs1200143 C | T | C | T | 0.039221 | 0.000595 | 0.3722 | 0.557637 | 9  | 34074478 | 0.006791 | 0.93   | 9  | 34074476 | 0.007324 | 4.28E-08  |
| rs1223690 T | C | T | C | 0.139762 | 0.00148  | 0.9872 | 0.883045 | 9  | 94735212 | 0.010713 | 0.89   | 9  | 97497494 | 0.031094 | 3.48E-06  |
| rs1260326 C | T | C | T | 0.067659 | 0.003182 | 0.6069 | 0.538665 | 2  | 27508073 | 0.006816 | 0.64   | 2  | 27730940 | 0.004768 | 5.36E-46  |
| rs1264025 C | A | C | A | 0.039221 | 0.005181 | 0.7149 | 0.606868 | 4  | 17791246 | 0.006831 | 0.45   | 4  | 17792869 | 0.004906 | 6.50E-16  |
| rs1271977 T | C | T | C | 0.039221 | 0.008015 | 0.5376 | 0.601585 | 8  | 1.45E+08 | 0.006954 | 0.25   | 8  | 1.46E+08 | 0.004906 | 6.50E-16  |

|             |   |   |   |          |           |        |          |    |          |          |       |    |          |          |          |
|-------------|---|---|---|----------|-----------|--------|----------|----|----------|----------|-------|----|----------|----------|----------|
| rs1280297 A | G | A | G | 0.029559 | -7.97E-05 | 0.4281 | 0.743516 | 11 | 1683366  | 0.007431 | 0.99  | 11 | 1704596  | 0.007395 | 3.20E-05 |
| rs1281140 A | G | A | G | 0.04879  | 0.005877  | 0.3305 | 0.126081 | 12 | 1.32E+08 | 0.010348 | 0.57  | 12 | 1.33E+08 | 0.007255 | 8.75E-12 |
| rs1291082 G | A | G | A | 0.04879  | 0.00117   | 0.3612 | 0.964457 | 15 | 90968030 | 0.017228 | 0.95  | 15 | 91511260 | 0.007255 | 8.75E-12 |
| rs1292002 A | T | A | T | 0.04879  | 0.007536  | 0.1575 | 0.128002 | 16 | 89497647 | 0.010274 | 0.46  | 16 | 89564055 | 0.007255 | 8.75E-12 |
| rs1304175 C | T | C | T | 0.058269 | -0.00503  | 0.1072 | 0.204611 | 20 | 21486157 | 0.008386 | 0.55  | 20 | 21466795 | 0.009628 | 7.14E-10 |
| rs1308513 C | T | C | T | 0.076961 | 0.065457  | 0.9283 | 0.993036 | 3  | 72816032 | 0.040034 | 0.1   | 3  | 72865183 | 0.011867 | 4.43E-11 |
| rs1316776 C | A | C | A | 0.04879  | -0.01232  | 0.6476 | 0.573247 | 5  | 79134784 | 0.006944 | 0.076 | 5  | 78430607 | 0.007324 | 1.35E-11 |
| rs1317617 G | A | G | A | 0.039221 | -0.00482  | 0.7976 | 0.745437 | 10 | 79336832 | 0.00789  | 0.54  | 10 | 81096589 | 0.009813 | 3.21E-05 |
| rs1359790 G | A | G | A | 0.086178 | 0.013943  | 0.7201 | 0.736071 | 13 | 80143021 | 0.007798 | 0.074 | 13 | 80717156 | 0.007054 | 1.26E-34 |
| rs1377807 C | G | C | G | 0.04879  | 0.008356  | 0.3118 | 0.135927 | 17 | 4142146  | 0.009816 | 0.39  | 17 | 4045440  | 0.007255 | 8.75E-12 |
| rs1381622 A | T | G | A | 0.122218 | 0.000219  | 0.9043 | 0.018252 | 2  | 43466909 | 0.02487  | 0.99  | 2  | 43698028 | 0.01124  | 7.70E-28 |
| rs1412234 C | T | C | T | 0.039221 | -0.01309  | 0.3229 | 0.153698 | 9  | 28410685 | 0.009535 | 0.17  | 9  | 28410683 | 0.007324 | 4.28E-08 |
| rs1412830 C | T | C | T | 0.039221 | 0.005871  | 0.6278 | 0.881604 | 9  | 22043613 | 0.010652 | 0.58  | 9  | 22043612 | 0.007395 | 5.67E-08 |
| rs1421085 C | T | C | T | 0.122218 | 0.003589  | 0.415  | 0.153698 | 16 | 53767042 | 0.009546 | 0.71  | 16 | 53800954 | 0.006743 | 1.02E-73 |
| rs1426371 G | A | G | A | 0.04879  | -0.00684  | 0.7389 | 0.45341  | 12 | 1.08E+08 | 0.006836 | 0.32  | 12 | 1.09E+08 | 0.007255 | 8.75E-12 |
| rs1516728 A | T | A | T | 0.029559 | -0.00758  | 0.759  | 0.424111 | 3  | 1.86E+08 | 0.006809 | 0.27  | 3  | 1.86E+08 | 0.007395 | 3.20E-05 |
| rs1531583 T | G | T | G | 0.122218 | -0.03882  | 0.0458 | 0.019452 | 4  | 751184   | 0.024763 | 0.12  | 4  | 744972   | 0.015878 | 6.95E-15 |
| rs1561927 C | T | C | T | 0.039221 | -0.0197   | 0.2686 | 0.056196 | 8  | 1.29E+08 | 0.014496 | 0.17  | 8  | 1.3E+08  | 0.007324 | 4.28E-08 |
| rs1562396 G | A | G | A | 0.058269 | -0.00922  | 0.3186 | 0.387368 | 7  | 1.31E+08 | 0.006976 | 0.19  | 7  | 1.3E+08  | 0.007186 | 2.57E-16 |
| rs1575972 T | A | T | A | 0.09531  | 0.002409  | 0.9671 | 0.962056 | 9  | 22301093 | 0.018327 | 0.9   | 9  | 22301092 | 0.018561 | 1.41E-07 |
| rs1580278 C | A | C | A | 0.039221 | -0.0035   | 0.4728 | 0.419549 | 4  | 1.03E+08 | 0.006953 | 0.62  | 4  | 1.04E+08 | 0.004906 | 6.50E-16 |
| rs1701331 G | A | G | A | 0.10436  | -0.0129   | 0.0313 | 0.111671 | 3  | 23468553 | 0.010788 | 0.23  | 3  | 23510044 | 0.018394 | 6.99E-09 |
| rs1708302 C | T | C | T | 0.09531  | 0.008128  | 0.5124 | 0.963016 | 7  | 28159058 | 0.017166 | 0.64  | 7  | 28198677 | 0.00699  | 1.22E-42 |
| rs1716848 T | C | T | C | 0.067659 | 0.007724  | 0.1808 | 0.465418 | 7  | 14858657 | 0.006787 | 0.26  | 7  | 14898282 | 0.00712  | 1.02E-21 |
| rs1726117 T | C | T | C | 0.039221 | -0.00512  | 0.5172 | 0.613833 | 5  | 52495391 | 0.006937 | 0.46  | 5  | 51791225 | 0.007395 | 5.67E-08 |
| rs1752212 T | G | T | G | 0.039221 | 0.012074  | 0.4742 | 0.388569 | 14 | 32833676 | 0.0069   | 0.08  | 14 | 33302882 | 0.004906 | 6.50E-16 |
| rs1768407 G | C | G | C | 0.039221 | -0.00978  | 0.7403 | 0.976945 | 18 | 57008153 | 0.021177 | 0.64  | 18 | 54675384 | 0.007324 | 4.28E-08 |
| rs1768900 G | A | G | A | 0.039221 | 0.003209  | 0.5329 | 0.962056 | 8  | 10117314 | 0.016705 | 0.85  | 8  | 9974824  | 0.004906 | 6.50E-16 |
| rs177045 G  | A | G | A | 0.067659 | -0.01136  | 0.3155 | 0.601825 | 10 | 69561523 | 0.006991 | 0.1   | 10 | 71321279 | 0.007186 | 2.37E-21 |
| rs1777281 G | A | G | A | 0.076961 | 0.000693  | 0.9151 | 0.990634 | 8  | 1.28E+08 | 0.035767 | 0.98  | 8  | 1.29E+08 | 0.014176 | 2.83E-08 |
| rs1779151 A | G | A | G | 0.09531  | -0.01166  | 0.9317 | 0.939962 | 9  | 79290675 | 0.014235 | 0.41  | 9  | 81905590 | 0.011545 | 7.56E-17 |
| rs1783541 T | C | T | C | 0.058269 | 0.003521  | 0.2035 | 0.167867 | 11 | 65527328 | 0.009215 | 0.7   | 11 | 65294799 | 0.007186 | 2.57E-16 |
| rs1796330 G | C | G | C | 0.04879  | -0.01402  | 0.5711 | 0.719741 | 12 | 71129173 | 0.007623 | 0.066 | 12 | 71522953 | 0.004859 | 5.05E-24 |
| rs1800961 T | C | T | C | 0.165514 | -0.00754  | 0.0353 | 0.01489  | 20 | 44413724 | 0.027641 | 0.78  | 20 | 43042364 | 0.017156 | 2.52E-22 |
| rs1866525 C | T | C | T | 0.058269 | 0.004925  | 0.1233 | 0.876321 | 18 | 38736759 | 0.010368 | 0.63  | 18 | 36278709 | 0.009628 | 7.14E-10 |
| rs1903002 G | C | G | C | 0.039221 | -0.0006   | 0.5005 | 0.736551 | 4  | 88819743 | 0.007467 | 0.94  | 4  | 89740894 | 0.007395 | 5.67E-08 |
| rs2028150 C | G | C | G | 0.04879  | 0.010517  | 0.5979 | 0.789385 | 2  | 65427878 | 0.008139 | 0.2   | 2  | 65655012 | 0.007324 | 1.35E-11 |
| rs2102278 G | A | G | A | 0.039221 | 0.001326  | 0.3186 | 0.591499 | 4  | 51952498 | 0.007064 | 0.85  | 4  | 52818664 | 0.007395 | 5.67E-08 |
| rs2189301 G | A | G | A | 0.04879  | 0.008121  | 0.8716 | 0.988233 | 17 | 37703678 | 0.030761 | 0.79  | 17 | 36063685 | 0.012092 | 2.73E-05 |
| rs2197973 T | C | T | C | 0.039221 | 0.01135   | 0.5375 | 0.725744 | 12 | 95534784 | 0.007693 | 0.14  | 12 | 95928560 | 0.007395 | 5.67E-08 |
| rs2237897 C | T | C | T | 0.207014 | 0.001222  | 0.9543 | 0.681556 | 11 | 2837316  | 0.007263 | 0.87  | 11 | 2858546  | 0.016598 | 5.28E-36 |
| rs2238689 C | T | C | T | 0.039221 | -0.00416  | 0.4177 | 0.550432 | 19 | 45675403 | 0.006954 | 0.55  | 19 | 46178661 | 0.004906 | 6.50E-16 |

|           |   |   |   |   |          |          |        |          |    |          |          |        |    |          |          |          |
|-----------|---|---|---|---|----------|----------|--------|----------|----|----------|----------|--------|----|----------|----------|----------|
| rs2249105 | A | G | A | G | 0.09531  | 0.003178 | 0.6343 | 0.663064 | 2  | 65060762 | 0.007093 | 0.65   | 2  | 65287896 | 0.011545 | 7.56E-17 |
| rs2272163 | C | A | C | A | 0.039221 | -0.00594 | 0.6184 | 0.560999 | 3  | 77622570 | 0.006923 | 0.39   | 3  | 77671721 | 0.007395 | 5.67E-08 |
| rs2280141 | T | G | T | G | 0.04879  | 0.00474  | 0.5161 | 0.381604 | 10 | 1.22E+08 | 0.007118 | 0.51   | 10 | 1.24E+08 | 0.007324 | 1.35E-11 |
| rs2283164 | A | G | A | G | 0.076961 | -0.02037 | 0.9468 | 0.942603 | 11 | 2557933  | 0.015002 | 0.17   | 11 | 2579163  | 0.016464 | 1.47E-06 |
| rs231349  | T | C | T | C | 0.067659 | 0.011793 | 0.1024 | 0.073247 | 11 | 2651591  | 0.013288 | 0.37   | 11 | 2672821  | 0.011867 | 5.95E-09 |
| rs231361  | A | G | A | G | 0.076961 | -0.01146 | 0.2564 | 0.76537  | 11 | 2670270  | 0.007784 | 0.14   | 11 | 2691500  | 0.007054 | 5.14E-28 |
| rs234853  | G | A | G | A | 0.076961 | -0.00525 | 0.2482 | 0.383525 | 11 | 2829598  | 0.006961 | 0.45   | 11 | 2850828  | 0.009449 | 1.90E-16 |
| rs243024  | A | G | A | G | 0.058269 | -0.0045  | 0.4599 | 0.638809 | 2  | 60356530 | 0.006999 | 0.52   | 2  | 60583665 | 0.004813 | 4.93E-34 |
| rs2431115 | A | G | A | G | 0.039221 | 0.000268 | 0.4015 | 0.53146  | 5  | 56552842 | 0.006788 | 0.97   | 5  | 55848669 | 0.007324 | 4.28E-08 |
| rs2456530 | T | C | T | C | 0.058269 | 0.003803 | 0.1272 | 0.46926  | 15 | 52799356 | 0.006822 | 0.58   | 15 | 53091553 | 0.009628 | 7.14E-10 |
| rs2465043 | G | A | G | A | 0.029559 | -0.00825 | 0.6441 | 0.407061 | 6  | 51315967 | 0.006897 | 0.23   | 6  | 51180765 | 0.004954 | 1.21E-09 |
| rs2581787 | T | G | T | G | 0.039221 | 0.023552 | 0.5634 | 0.709894 | 3  | 53093661 | 0.007491 | 0.0017 | 3  | 53127677 | 0.007395 | 5.67E-08 |
| rs2642588 | G | T | G | T | 0.04879  | 0.012138 | 0.7016 | 0.848463 | 10 | 69706822 | 0.009339 | 0.19   | 10 | 71466578 | 0.007255 | 8.75E-12 |
| rs2727301 | T | C | T | C | 0.039221 | -0.01121 | 0.7538 | 0.977426 | 17 | 63887683 | 0.022647 | 0.62   | 17 | 61965043 | 0.007395 | 5.67E-08 |
| rs2767036 | C | A | C | A | 0.039221 | -0.00236 | 0.2908 | 0.248319 | 11 | 34960601 | 0.007883 | 0.76   | 11 | 34982148 | 0.007395 | 5.67E-08 |
| rs2796441 | G | A | G | A | 0.067659 | 0.00254  | 0.5924 | 0.413545 | 9  | 81694033 | 0.006913 | 0.71   | 9  | 84308948 | 0.007186 | 2.37E-21 |
| rs2800733 | A | G | A | G | 0.04879  | -0.01527 | 0.7165 | 0.873199 | 6  | 1.27E+08 | 0.010575 | 0.15   | 6  | 1.27E+08 | 0.007324 | 1.35E-11 |
| rs2820446 | C | G | C | G | 0.058269 | -0.00065 | 0.7055 | 0.78122  | 1  | 2.2E+08  | 0.008233 | 0.94   | 1  | 2.2E+08  | 0.007255 | 4.79E-16 |
| rs2850590 | G | A | G | A | 0.086178 | 0.004911 | 0.752  | 0.954851 | 9  | 1.36E+08 | 0.0162   | 0.76   | 9  | 1.39E+08 | 0.009363 | 1.72E-20 |
| rs2851085 | C | G | A | G | 0.058269 | 0.012724 | 0.8983 | 0.376561 | 3  | 1.3E+08  | 0.006989 | 0.069  | 3  | 1.29E+08 | 0.009628 | 7.14E-10 |
| rs2852537 | G | T | G | T | 0.029559 | -0.00554 | 0.4216 | 0.377041 | 2  | 42980732 | 0.006994 | 0.43   | 2  | 43207872 | 0.004954 | 1.21E-09 |
| rs2863814 | A | C | A | C | 0.076961 | -0.01149 | 0.0442 | 0.237032 | 12 | 1.21E+08 | 0.008064 | 0.15   | 12 | 1.22E+08 | 0.016617 | 1.82E-06 |
| rs286925  | A | G | A | G | 0.039221 | 0.009563 | 0.1815 | 0.594621 | 11 | 34621121 | 0.006947 | 0.17   | 11 | 34642668 | 0.009813 | 3.21E-05 |
| rs2871946 | C | T | C | T | 0.039221 | 0.004265 | 0.1586 | 0.026897 | 18 | 55784913 | 0.021155 | 0.84   | 18 | 53452144 | 0.009813 | 3.21E-05 |
| rs2908334 | T | C | T | C | 0.029559 | -0.00049 | 0.6308 | 0.706532 | 7  | 15166614 | 0.007287 | 0.95   | 7  | 15206239 | 0.004954 | 1.21E-09 |
| rs2972144 | G | A | G | A | 0.09531  | 0.00038  | 0.6385 | 0.900817 | 2  | 2.26E+08 | 0.01129  | 0.97   | 2  | 2.27E+08 | 0.00699  | 1.22E-42 |
| rs3111316 | A | G | A | G | 0.04879  | -0.0117  | 0.5885 | 0.821326 | 19 | 12927601 | 0.008844 | 0.19   | 19 | 13038415 | 0.007324 | 1.35E-11 |
| rs3115960 | G | C | G | C | 0.029559 | 0.004174 | 0.37   | 0.443324 | 16 | 75482636 | 0.006811 | 0.54   | 16 | 75516534 | 0.007395 | 3.20E-05 |
| rs3217860 | G | A | G | A | 0.04879  | 0.002521 | 0.258  | 0.574448 | 12 | 4289884  | 0.006891 | 0.71   | 12 | 4399050  | 0.007324 | 1.35E-11 |
| rs329122  | A | G | A | G | 0.039221 | -0.00353 | 0.4286 | 0.401297 | 5  | 1.35E+08 | 0.007027 | 0.62   | 5  | 1.34E+08 | 0.004906 | 6.50E-16 |
| rs340874  | C | T | C | T | 0.067659 | -0.00686 | 0.5555 | 0.427714 | 1  | 2.14E+08 | 0.006794 | 0.31   | 1  | 2.14E+08 | 0.007186 | 2.37E-21 |
| rs3429898 | T | C | T | C | 0.039221 | 0.002797 | 0.4967 | 0.597262 | 6  | 40441504 | 0.00692  | 0.69   | 6  | 40409243 | 0.004906 | 6.50E-16 |
| rs3445410 | A | T | A | T | 0.039221 | -0.01831 | 0.7709 | 0.850624 | 20 | 52607055 | 0.009706 | 0.059  | 20 | 51223594 | 0.007324 | 4.28E-08 |
| rs3458416 | A | G | A | G | 0.04879  | 0.003621 | 0.7598 | 0.64025  | 13 | 26202862 | 0.006975 | 0.6    | 13 | 26776999 | 0.007324 | 1.35E-11 |
| rs348330  | G | A | G | A | 0.04879  | 0.019638 | 0.3605 | 0.665466 | 1  | 2.3E+08  | 0.007205 | 0.0064 | 1  | 2.3E+08  | 0.007255 | 8.75E-12 |
| rs3485540 | C | G | C | G | 0.04879  | -0.00323 | 0.2772 | 0.23487  | 17 | 42579393 | 0.008153 | 0.69   | 17 | 40731411 | 0.007255 | 8.75E-12 |
| rs3535284 | T | C | T | C | 0.067659 | 0.000795 | 0.7878 | 0.79755  | 3  | 23414091 | 0.008594 | 0.93   | 3  | 23455582 | 0.009538 | 6.52E-13 |
| rs3549723 | C | T | C | T | 0.039221 | -0.00646 | 0.3169 | 0.353026 | 3  | 1.53E+08 | 0.007086 | 0.36   | 3  | 1.52E+08 | 0.007395 | 5.67E-08 |
| rs3565495 | C | T | C | T | 0.029559 | -0.00905 | 0.367  | 0.274015 | 4  | 1016289  | 0.007826 | 0.25   | 4  | 1010077  | 0.007395 | 3.20E-05 |
| rs3589568 | C | A | C | A | 0.058269 | -0.00025 | 0.678  | 0.956052 | 17 | 48982960 | 0.016636 | 0.99   | 17 | 47060322 | 0.007255 | 4.79E-16 |
| rs3591346 | C | T | C | T | 0.058269 | -0.00146 | 0.8291 | 0.92123  | 2  | 653575   | 0.012854 | 0.91   | 2  | 653575   | 0.009628 | 7.14E-10 |
| rs3599910 | T | C | T | C | 0.04879  | -0.00616 | 0.1547 | 0.244476 | 2  | 1.47E+08 | 0.00808  | 0.45   | 2  | 1.48E+08 | 0.009719 | 2.58E-07 |

|             |   |   |   |          |          |        |          |    |          |          |       |    |          |          |          |
|-------------|---|---|---|----------|----------|--------|----------|----|----------|----------|-------|----|----------|----------|----------|
| rs3751837 T | C | T | C | 0.039221 | 0.013592 | 0.22   | 0.229587 | 16 | 3533173  | 0.007997 | 0.089 | 16 | 3583173  | 0.007324 | 4.28E-08 |
| rs3768321 T | G | T | G | 0.086178 | -0.00335 | 0.2004 | 0.105187 | 1  | 39570256 | 0.011215 | 0.77  | 1  | 40035928 | 0.007054 | 1.26E-34 |
| rs3772071 T | C | T | C | 0.04879  | -0.00297 | 0.7135 | 0.78146  | 2  | 1.6E+08  | 0.008226 | 0.72  | 2  | 1.61E+08 | 0.007324 | 1.35E-11 |
| rs3774723 G | A | G | A | 0.067659 | 0.007536 | 0.8442 | 0.618396 | 3  | 63976663 | 0.007133 | 0.29  | 3  | 63962339 | 0.009538 | 6.52E-13 |
| rs3802177 G | A | G | A | 0.10436  | 0.001203 | 0.6851 | 0.548031 | 8  | 1.17E+08 | 0.006858 | 0.86  | 8  | 1.18E+08 | 0.006864 | 1.67E-52 |
| rs3810291 A | G | A | G | 0.04879  | 0.018924 | 0.673  | 0.295149 | 19 | 47065746 | 0.007523 | 0.012 | 19 | 47569003 | 0.007324 | 1.35E-11 |
| rs3811978 G | A | G | A | 0.058269 | 0.002744 | 0.1668 | 0.167627 | 5  | 52804655 | 0.009319 | 0.77  | 5  | 52100489 | 0.007255 | 4.79E-16 |
| rs3826482 A | T | A | T | 0.029559 | -0.01511 | 0.5756 | 0.766811 | 17 | 3957062  | 0.007951 | 0.057 | 17 | 3860356  | 0.007395 | 3.20E-05 |
| rs3887925 T | C | T | C | 0.067659 | -0.00909 | 0.5468 | 0.505283 | 3  | 1.87E+08 | 0.006864 | 0.19  | 3  | 1.87E+08 | 0.007186 | 2.37E-21 |
| rs39328 T   | C | T | C | 0.039221 | -0.00157 | 0.4334 | 0.402017 | 7  | 1.04E+08 | 0.007017 | 0.82  | 7  | 1.03E+08 | 0.007395 | 5.67E-08 |
| rs4148856 C | G | C | G | 0.04879  | -0.00326 | 0.7814 | 0.872238 | 12 | 1.23E+08 | 0.010336 | 0.75  | 12 | 1.23E+08 | 0.009719 | 2.58E-07 |
| rs4238013 C | T | C | T | 0.058269 | -0.00495 | 0.2087 | 0.071806 | 12 | 4266923  | 0.013429 | 0.71  | 12 | 4376089  | 0.007255 | 4.79E-16 |
| rs4279506 G | C | G | C | 0.058269 | 0.01326  | 0.6102 | 0.149856 | 7  | 23473277 | 0.008938 | 0.14  | 7  | 23512896 | 0.009628 | 7.14E-10 |
| rs4281707 G | A | G | A | 0.039221 | 0.006339 | 0.5442 | 0.76585  | 16 | 53468034 | 0.00802  | 0.43  | 16 | 53501946 | 0.004906 | 6.50E-16 |
| rs429358 T  | C | T | C | 0.076961 | -0.00356 | 0.8458 | 0.909462 | 19 | 44908684 | 0.01192  | 0.77  | 19 | 45411941 | 0.009449 | 1.90E-16 |
| rs445084 G  | A | G | A | 0.029559 | 0.018123 | 0.3613 | 0.138329 | 11 | 2887524  | 0.010008 | 0.07  | 11 | 2908754  | 0.007395 | 3.20E-05 |
| rs4457053 G | A | G | A | 0.058269 | -0.00873 | 0.3036 | 0.079491 | 5  | 77129124 | 0.012517 | 0.49  | 5  | 76424949 | 0.007186 | 2.57E-16 |
| rs465002 T  | C | T | C | 0.10436  | -0.011   | 0.7421 | 0.498079 | 5  | 56512648 | 0.006812 | 0.11  | 5  | 55808475 | 0.006926 | 1.33E-51 |
| rs4688760 T | C | T | C | 0.039221 | 0.001824 | 0.6842 | 0.223583 | 3  | 49943163 | 0.00828  | 0.83  | 3  | 49980596 | 0.007324 | 4.28E-08 |
| rs4709746 C | T | C | T | 0.058269 | -0.00281 | 0.8676 | 0.917627 | 6  | 1.64E+08 | 0.012284 | 0.82  | 6  | 1.64E+08 | 0.009628 | 7.14E-10 |
| rs4736819 T | C | T | C | 0.039221 | 0.014627 | 0.5537 | 0.37512  | 8  | 41652396 | 0.00702  | 0.037 | 8  | 41509915 | 0.007395 | 5.67E-08 |
| rs474513 A  | G | A | G | 0.039221 | 0.007831 | 0.5169 | 0.702209 | 6  | 1.6E+08  | 0.007323 | 0.28  | 6  | 1.61E+08 | 0.004906 | 6.50E-16 |
| rs4776970 A | T | A | T | 0.039221 | -0.00758 | 0.6406 | 0.239914 | 15 | 67788548 | 0.0079   | 0.34  | 15 | 68080886 | 0.004906 | 6.50E-16 |
| rs4810426 T | C | T | C | 0.086178 | 0.0005   | 0.1064 | 0.401537 | 20 | 44373081 | 0.006976 | 0.94  | 20 | 43001721 | 0.011651 | 6.97E-14 |
| rs4925109 A | G | A | G | 0.04879  | -0.02274 | 0.3164 | 0.858549 | 17 | 17758488 | 0.009705 | 0.019 | 17 | 17661802 | 0.007324 | 1.35E-11 |
| rs4929965 A | G | A | G | 0.067659 | 1.81E-05 | 0.3829 | 0.081892 | 11 | 2176056  | 0.012395 | 1     | 11 | 2197286  | 0.00712  | 1.02E-21 |
| rs4930091 C | T | C | T | 0.039221 | -0.00295 | 0.7594 | 0.303794 | 11 | 2351126  | 0.007219 | 0.68  | 11 | 2372356  | 0.007395 | 5.67E-08 |
| rs4946812 G | A | G | A | 0.039221 | 0.008109 | 0.6743 | 0.841499 | 6  | 1.07E+08 | 0.009545 | 0.4   | 6  | 1.07E+08 | 0.004906 | 6.50E-16 |
| rs4977213 C | T | C | T | 0.04879  | -0.00609 | 0.3749 | 0.413064 | 8  | 1.44E+08 | 0.006994 | 0.38  | 8  | 1.46E+08 | 0.007255 | 8.75E-12 |
| rs523288 T  | A | T | A | 0.04879  | 0.00661  | 0.2377 | 0.182757 | 18 | 60181136 | 0.008801 | 0.45  | 18 | 57848369 | 0.007255 | 8.75E-12 |
| rs5565356 A | C | A | C | 0.039221 | -0.0018  | 0.7321 | 0.902257 | 9  | 94239400 | 0.011341 | 0.87  | 9  | 97001682 | 0.007324 | 4.28E-08 |
| rs5593549 C | T | C | T | 0.086178 | 0.024326 | 0.0378 | 0.974304 | 8  | 41698218 | 0.021559 | 0.26  | 8  | 41552046 | 0.018731 | 2.11E-06 |
| rs5615804 G | C | A | G | 0.04879  | -0.01603 | 0.6889 | 0.012248 | 12 | 1.21E+08 | 0.030229 | 0.6   | 12 | 1.21E+08 | 0.007255 | 8.75E-12 |
| rs5633723 C | T | C | T | 0.058269 | -0.01755 | 0.5026 | 0.284822 | 4  | 1782676  | 0.007477 | 0.019 | 4  | 1784403  | 0.007255 | 4.79E-16 |
| rs5732734 A | T | A | T | 0.039221 | -0.01065 | 0.782  | 0.884966 | 8  | 10951177 | 0.010616 | 0.32  | 8  | 10808687 | 0.009813 | 3.21E-05 |
| rs5758223 A | G | A | G | 0.039221 | 0.004101 | 0.7167 | 0.973823 | 22 | 41093916 | 0.02047  | 0.84  | 22 | 41489920 | 0.004906 | 6.50E-16 |
| rs576674 G  | A | G | A | 0.04879  | 0.000975 | 0.1694 | 0.213497 | 13 | 32980164 | 0.008307 | 0.91  | 13 | 33554302 | 0.007255 | 8.75E-12 |
| rs5843219 C | T | C | T | 0.067659 | 0.004396 | 0.8811 | 0.909942 | 1  | 50790419 | 0.011943 | 0.71  | 1  | 51256091 | 0.009538 | 6.52E-13 |
| rs6015034 T | C | T | C | 0.067659 | 0.055259 | 0.858  | 0.008886 | 4  | 1.85E+08 | 0.036731 | 0.13  | 4  | 1.86E+08 | 0.009538 | 6.52E-13 |
| rs601945 G  | A | G | A | 0.058269 | -0.00481 | 0.1775 | 0.073727 | 6  | 32605638 | 0.013004 | 0.71  | 6  | 32573415 | 0.009628 | 7.14E-10 |
| rs6027634 T | C | T | C | 0.04879  | -0.01351 | 0.1397 | 0.022334 | 17 | 64125944 | 0.023215 | 0.56  | 17 | 62203304 | 0.009719 | 2.58E-07 |
| rs6063048 G | A | G | A | 0.04879  | -0.00928 | 0.7246 | 0.96926  | 20 | 46969925 | 0.019148 | 0.63  | 20 | 45598564 | 0.007324 | 1.35E-11 |

|           |   |   |   |          |          |        |          |    |          |          |       |    |          |          |          |
|-----------|---|---|---|----------|----------|--------|----------|----|----------|----------|-------|----|----------|----------|----------|
| rs6070625 | G | C | C | 0.04879  | -0.00138 | 0.5174 | 0.67243  | 20 | 58819573 | 0.007259 | 0.85  | 20 | 57394628 | 0.004859 | 5.05E-24 |
| rs6167654 | C | G | G | 0.058269 | -0.00435 | 0.1924 | 0.638329 | 17 | 67896391 | 0.006812 | 0.52  | 17 | 65892507 | 0.007255 | 4.79E-16 |
| rs6185020 | C | G | G | 0.039221 | 0.008447 | 0.2768 | 0.121998 | 10 | 69561902 | 0.010524 | 0.42  | 10 | 71321658 | 0.007395 | 5.67E-08 |
| rs6188111 | G | A | A | 0.04879  | 0.003138 | 0.838  | 0.98415  | 11 | 69229758 | 0.0261   | 0.9   | 11 | 68997225 | 0.007324 | 1.35E-11 |
| rs6237048 | A | G | G | 0.039221 | 0.01664  | 0.2195 | 0.010327 | 5  | 53478680 | 0.034115 | 0.63  | 5  | 52774510 | 0.007395 | 5.67E-08 |
| rs6248240 | G | T | T | 0.04879  | 0.002888 | 0.0819 | 0.052113 | 7  | 1.03E+08 | 0.014583 | 0.84  | 7  | 1.03E+08 | 0.012092 | 2.73E-05 |
| rs6249236 | A | G | G | 0.04879  | -0.00734 | 0.3081 | 0.513689 | 7  | 1.51E+08 | 0.006812 | 0.28  | 7  | 1.51E+08 | 0.007324 | 1.35E-11 |
| rs6458354 | C | T | T | 0.04879  | 0.006812 | 0.289  | 0.148655 | 6  | 43846453 | 0.009643 | 0.48  | 6  | 43814190 | 0.007255 | 8.75E-12 |
| rs6647770 | T | C | C | 0.086178 | 0.007251 | 0.967  | 0.871037 | 2  | 1.21E+08 | 0.010139 | 0.47  | 2  | 1.21E+08 | 0.018731 | 2.11E-06 |
| rs6714881 | A | G | G | 0.086178 | 0.012841 | 0.9373 | 0.009126 | 2  | 1.57E+08 | 0.036244 | 0.72  | 2  | 1.58E+08 | 0.011758 | 1.16E-13 |
| rs6723254 | T | C | C | 0.058269 | -0.01688 | 0.207  | 0.186359 | 11 | 1.29E+08 | 0.008783 | 0.055 | 11 | 1.28E+08 | 0.007255 | 4.79E-16 |
| rs6780171 | A | T | T | 0.131028 | -0.00054 | 0.3138 | 0.248799 | 3  | 1.86E+08 | 0.007762 | 0.94  | 3  | 1.86E+08 | 0.008952 | 8.16E-49 |
| rs6821438 | A | G | G | 0.039221 | 0.017877 | 0.5342 | 0.300672 | 4  | 94170760 | 0.007373 | 0.015 | 4  | 95091911 | 0.007324 | 4.28E-08 |
| rs6884702 | G | A | A | 0.039221 | 0.007401 | 0.3932 | 0.534102 | 5  | 44682487 | 0.00699  | 0.29  | 5  | 44682589 | 0.007324 | 4.28E-08 |
| rs7022807 | G | A | A | 0.039221 | -0.00693 | 0.4014 | 0.257685 | 9  | 19067835 | 0.007781 | 0.37  | 9  | 19067833 | 0.004906 | 6.50E-16 |
| rs702634  | A | G | G | 0.04879  | 0.019809 | 0.69   | 0.847022 | 5  | 53975590 | 0.009706 | 0.041 | 5  | 53271420 | 0.007255 | 8.75E-12 |
| rs7078559 | T | C | C | 0.029559 | 0.007582 | 0.5783 | 0.547791 | 10 | 92164906 | 0.006806 | 0.27  | 10 | 93924663 | 0.007395 | 3.20E-05 |
| rs7115753 | A | G | G | 0.039221 | 0.003646 | 0.4494 | 0.680596 | 11 | 45890462 | 0.00736  | 0.62  | 11 | 45912013 | 0.004906 | 6.50E-16 |
| rs7124681 | A | C | C | 0.039221 | 0.005463 | 0.4097 | 0.273535 | 11 | 47508395 | 0.007815 | 0.48  | 11 | 47529947 | 0.004906 | 6.50E-16 |
| rs7137225 | C | T | T | 0.076961 | 0.039046 | 0.0642 | 0.011047 | 17 | 31086001 | 0.032993 | 0.24  | 17 | 29413019 | 0.011867 | 4.43E-11 |
| rs7178762 | C | T | T | 0.039221 | -0.00277 | 0.4595 | 0.900336 | 15 | 63579093 | 0.011175 | 0.8   | 15 | 63871292 | 0.004906 | 6.50E-16 |
| rs718314  | G | A | A | 0.04879  | -0.00206 | 0.2532 | 0.637368 | 12 | 26300350 | 0.006922 | 0.77  | 12 | 26453283 | 0.007324 | 1.35E-11 |
| rs7240767 | C | T | T | 0.039221 | 0.008609 | 0.3762 | 0.712776 | 18 | 7070643  | 0.00754  | 0.25  | 18 | 7070642  | 0.007395 | 5.67E-08 |
| rs7249758 | A | G | G | 0.04879  | 0.00061  | 0.2039 | 0.03074  | 19 | 4948850  | 0.018843 | 0.97  | 19 | 4948862  | 0.009719 | 2.58E-07 |
| rs7268899 | C | G | T | 0.058269 | 0.003214 | 0.2171 | 0.006964 | 14 | 79388542 | 0.041458 | 0.94  | 14 | 79932041 | 0.009628 | 7.14E-10 |
| rs7280234 | C | A | A | 0.157004 | 0.00353  | 0.9231 | 0.875841 | 16 | 75200974 | 0.010548 | 0.74  | 16 | 75234872 | 0.013085 | 1.80E-33 |
| rs7318723 | G | A | A | 0.076961 | 0.004282 | 0.0512 | 0.894092 | 22 | 50163478 | 0.011393 | 0.71  | 22 | 50604696 | 0.014176 | 2.83E-08 |
| rs738408  | T | C | C | 0.04879  | 0.00364  | 0.2261 | 0.352546 | 22 | 43928850 | 0.007073 | 0.61  | 22 | 44324730 | 0.009719 | 2.58E-07 |
| rs7519705 | C | A | G | 0.09531  | 0.014282 | 0.9571 | 0.127041 | 3  | 1.53E+08 | 0.010161 | 0.16  | 3  | 1.52E+08 | 0.016313 | 2.57E-09 |
| rs7525392 | C | T | T | 0.04879  | -0.00993 | 0.1909 | 0.022334 | 19 | 7240837  | 0.022491 | 0.66  | 19 | 7240848  | 0.007324 | 1.35E-11 |
| rs7615045 | G | A | A | 0.113329 | -0.00045 | 0.2388 | 0.267291 | 3  | 1.86E+08 | 0.007569 | 0.95  | 3  | 1.86E+08 | 0.020602 | 1.89E-08 |
| rs7629630 | A | T | T | 0.04879  | -0.0216  | 0.8567 | 0.980548 | 3  | 1.69E+08 | 0.025087 | 0.39  | 3  | 1.68E+08 | 0.009719 | 2.58E-07 |
| rs7746418 | A | C | C | 0.10436  | -0.0055  | 0.8363 | 0.918828 | 11 | 72749353 | 0.012589 | 0.66  | 11 | 72460398 | 0.009194 | 3.66E-30 |
| rs7786482 | A | G | G | 0.076961 | 0.019782 | 0.9324 | 0.957493 | 12 | 97454997 | 0.016976 | 0.24  | 12 | 97848775 | 0.014176 | 2.83E-08 |
| rs7802029 | A | G | G | 0.086178 | 0.00819  | 0.0517 | 0.056196 | 16 | 53724808 | 0.014795 | 0.58  | 16 | 53758720 | 0.014046 | 4.25E-10 |
| rs7802555 | C | G | G | 0.04879  | 0.010302 | 0.851  | 0.973343 | 10 | 1.13E+08 | 0.021199 | 0.63  | 10 | 1.15E+08 | 0.009719 | 2.58E-07 |
| rs7840347 | G | C | C | 0.058269 | -0.00994 | 0.8956 | 0.85927  | 9  | 1.36E+08 | 0.009975 | 0.32  | 9  | 1.39E+08 | 0.012092 | 7.23E-07 |
| rs7867635 | C | T | T | 0.039221 | -0.00054 | 0.4123 | 0.880644 | 9  | 20241071 | 0.010421 | 0.96  | 9  | 20241069 | 0.007395 | 5.67E-08 |
| rs7918400 | T | C | C | 0.058269 | 0.002583 | 0.4761 | 0.910663 | 10 | 1.13E+08 | 0.011554 | 0.82  | 10 | 1.15E+08 | 0.007255 | 4.79E-16 |
| rs7976843 | G | T | T | 0.113329 | 0.010043 | 0.0225 | 0.982709 | 1  | 2.14E+08 | 0.026163 | 0.7   | 1  | 2.14E+08 | 0.022792 | 3.31E-07 |
| rs7987740 | T | C | C | 0.039221 | 0.005196 | 0.6094 | 0.493276 | 13 | 1.09E+08 | 0.006794 | 0.44  | 13 | 1.1E+08  | 0.007395 | 5.67E-08 |
| rs8010237 | G | T | T | 0.139762 | -0.04435 | 0.9822 | 0.987512 | 11 | 2612947  | 0.030479 | 0.15  | 11 | 2634177  | 0.026644 | 7.79E-08 |

|           |   |   |   |   |          |          |        |          |    |          |          |       |    |          |          |          |
|-----------|---|---|---|---|----------|----------|--------|----------|----|----------|----------|-------|----|----------|----------|----------|
| rs8010382 | G | A | G | A | 0.039221 | -0.0036  | 0.4214 | 0.471662 | 14 | 91497378 | 0.006884 | 0.6   | 14 | 91963722 | 0.004906 | 6.50E-16 |
| rs8017808 | G | T | G | T | 0.039221 | 0.009563 | 0.7431 | 0.391451 | 14 | 38379215 | 0.007115 | 0.18  | 14 | 38848419 | 0.007324 | 4.28E-08 |
| rs8032939 | C | T | C | T | 0.058269 | 0.010348 | 0.246  | 0.558838 | 15 | 38541832 | 0.006796 | 0.13  | 15 | 38834033 | 0.007255 | 4.79E-16 |
| rs8046545 | G | A | G | A | 0.039221 | -0.026   | 0.3589 | 0.07757  | 16 | 28903896 | 0.012818 | 0.043 | 16 | 28915217 | 0.007395 | 5.67E-08 |
| rs862320  | C | T | C | T | 0.039221 | 0.002839 | 0.5783 | 0.865994 | 16 | 69617963 | 0.009888 | 0.77  | 16 | 69651866 | 0.007324 | 4.28E-08 |
| rs878521  | A | G | A | G | 0.058269 | -0.00114 | 0.2451 | 0.353026 | 7  | 44216044 | 0.007116 | 0.87  | 7  | 44255643 | 0.007255 | 4.79E-16 |
| rs914744  | C | T | C | T | 0.039221 | -0.00521 | 0.3311 | 0.800192 | 9  | 1.37E+08 | 0.008741 | 0.55  | 9  | 1.4E+08  | 0.007395 | 5.67E-08 |
| rs917195  | C | T | C | T | 0.04879  | -0.00049 | 0.77   | 0.823967 | 7  | 30688836 | 0.008889 | 0.96  | 7  | 30728452 | 0.007255 | 8.75E-12 |
| rs9200655 | C | T | C | T | 0.04879  | 0.001631 | 0.3317 | 0.369597 | 9  | 1.33E+08 | 0.007032 | 0.82  | 9  | 1.36E+08 | 0.007324 | 1.35E-11 |
| rs9379084 | G | A | G | A | 0.10436  | 0.005478 | 0.8873 | 0.883766 | 6  | 7231610  | 0.010704 | 0.61  | 6  | 7231843  | 0.011545 | 7.88E-20 |
| rs9494624 | A | G | A | G | 0.039221 | -0.00441 | 0.2899 | 0.213497 | 6  | 1.37E+08 | 0.008345 | 0.6   | 6  | 1.37E+08 | 0.007324 | 4.28E-08 |
| rs9505097 | C | T | C | T | 0.04879  | -0.01684 | 0.7994 | 0.934678 | 6  | 7255417  | 0.013612 | 0.22  | 6  | 7255650  | 0.009719 | 2.58E-07 |
| rs9537803 | C | T | C | T | 0.039221 | -0.00671 | 0.2771 | 0.092699 | 13 | 57792500 | 0.011889 | 0.57  | 13 | 58366634 | 0.007324 | 4.28E-08 |
| rs9563615 | A | T | A | T | 0.04879  | 0.001391 | 0.7101 | 0.512728 | 13 | 58503272 | 0.006789 | 0.84  | 13 | 59077406 | 0.007324 | 1.35E-11 |
| rs9569864 | C | T | C | T | 0.04879  | -0.00214 | 0.8247 | 0.513929 | 13 | 58391301 | 0.006828 | 0.75  | 13 | 58965435 | 0.007324 | 1.35E-11 |
| rs963740  | A | T | A | T | 0.039221 | -0.00812 | 0.7128 | 0.357349 | 13 | 50521959 | 0.007223 | 0.26  | 13 | 51096095 | 0.004906 | 6.50E-16 |
| rs96844   | G | A | G | A | 0.039221 | 0.000856 | 0.2622 | 0.764649 | 5  | 56900777 | 0.007817 | 0.91  | 5  | 56196604 | 0.004906 | 6.50E-16 |
| rs9687832 | A | G | A | G | 0.076961 | -0.00157 | 0.1975 | 0.136647 | 5  | 56565768 | 0.009921 | 0.87  | 5  | 55861595 | 0.009449 | 1.90E-16 |
| rs9860730 | A | G | A | G | 0.058269 | 0.004185 | 0.7036 | 0.273055 | 3  | 64715470 | 0.007622 | 0.58  | 3  | 64701146 | 0.007255 | 4.79E-16 |
| rs9873618 | G | A | G | A | 0.067659 | -0.00504 | 0.71   | 0.785303 | 3  | 1.71E+08 | 0.008315 | 0.54  | 3  | 1.71E+08 | 0.007186 | 2.37E-21 |
| rs9957145 | G | A | G | A | 0.04879  | 0.006362 | 0.829  | 0.799232 | 18 | 59208996 | 0.008693 | 0.46  | 18 | 56876228 | 0.009719 | 2.58E-07 |



Supplementary Table 2d. List of SNPs for HbA1c and their effects on TEWL

| SNP         | effect_alle | other_allele | effect_alle | other_allele | beta.HbA1 | beta.TEWL | eaf.HbA1c | eaf.TEWL | chr.TEWL | pos.TEWL | se.TEWL  | pval.TEWL | chr.HbA1c | pos.HbA1c | se.HbA1c | pval.HbA1c |
|-------------|-------------|--------------|-------------|--------------|-----------|-----------|-----------|----------|----------|----------|----------|-----------|-----------|-----------|----------|------------|
| chr1:1003:G | A           | G            | A           |              | -0.0155   | 0.006565  | 0.351672  | 0.720461 | 1        | 1E+08    | 0.007595 | 0.39      | 1         | 1.01E+08  | 0.0026   | 1.33E-09   |
| chr1:1111:C | G           | C            | G           |              | 0.0191    | 0.011418  | 0.224544  | 0.241114 | 1        | 1.11E+08 | 0.007971 | 0.15      | 1         | 1.12E+08  | 0.0029   | 4.90E-11   |
| chr1:1585:C | T           | C            | T           |              | 0.0758    | -0.00027  | 0.233997  | 0.633285 | 1        | 1.59E+08 | 0.007117 | 0.97      | 1         | 1.59E+08  | 0.0029   | 3.75E-152  |
| chr1:1586:T | A           | T            | A           |              | 0.0822    | 0.00351   | 0.266075  | 0.585255 | 1        | 1.59E+08 | 0.006892 | 0.61      | 1         | 1.59E+08  | 0.0028   | 2.76E-194  |
| chr1:2036:T | C           | T            | C           |              | 0.0297    | -0.01705  | 0.097996  | 0.018012 | 1        | 2.04E+08 | 0.025019 | 0.5       | 1         | 2.04E+08  | 0.004    | 1.54E-13   |
| chr1:2070:C | T           | C            | T           |              | 0.0149    | -0.00203  | 0.406155  | 0.804995 | 1        | 2.07E+08 | 0.008794 | 0.82      | 1         | 2.07E+08  | 0.0025   | 2.08E-09   |
| chr1:3778:G | A           | G            | A           |              | -0.0366   | 0.033692  | 0.244157  | 0.983429 | 1        | 3778232  | 0.025327 | 0.18      | 1         | 3694796   | 0.003    | 1.59E-34   |
| chr10:113:G | A           | G            | A           |              | 0.021     | 0.000567  | 0.461621  | 0.9378   | 10       | 1.13E+08 | 0.013838 | 0.97      | 10        | 1.15E+08  | 0.0025   | 1.20E-17   |
| chr10:690:T | C           | T            | C           |              | -0.0444   | -0.02067  | 0.031689  | 0.914986 | 10       | 69085335 | 0.012301 | 0.093     | 10        | 70845091  | 0.0067   | 3.27E-11   |
| chr10:691:A | C           | A            | C           |              | -0.1319   | -0.03143  | 0.027959  | 0.987752 | 10       | 69172435 | 0.030194 | 0.3       | 10        | 70932191  | 0.0074   | 1.19E-70   |
| chr10:693:C | T           | G            | T           |              | -0.133    | 0.013024  | 0.042886  | 0.008165 | 10       | 69380983 | 0.037225 | 0.73      | 10        | 71138133  | 0.006    | 2.46E-109  |
| chr10:694:C | G           | C            | G           |              | 0.0241    | -0.00237  | 0.189859  | 0.938281 | 10       | 69417164 | 0.014072 | 0.87      | 10        | 71176920  | 0.0031   | 1.22E-14   |
| chr10:694:A | G           | A            | G           |              | 0.0266    | 0.036233  | 0.082039  | 0.993276 | 10       | 69448568 | 0.042124 | 0.39      | 10        | 71208324  | 0.0045   | 2.92E-09   |
| chr10:696:G | C           | G            | C           |              | -0.0207   | -0.02627  | 0.23849   | 0.879923 | 10       | 69601005 | 0.010575 | 0.013     | 10        | 71360761  | 0.0029   | 6.01E-13   |
| chr10:792:T | C           | T            | C           |              | 0.0154    | -0.00487  | 0.413878  | 0.2817   | 10       | 79205218 | 0.007528 | 0.52      | 10        | 80964975  | 0.0025   | 5.66E-10   |
| chr11:100:A | G           | A            | G           |              | -0.0577   | 0.013631  | 0.08216   | 0.879443 | 11       | 1.01E+08 | 0.010399 | 0.19      | 11        | 1E+08     | 0.0047   | 4.03E-35   |
| chr11:929:C | T           | C            | T           |              | 0.0524    | 0.003376  | 0.288752  | 0.539625 | 11       | 92940662 | 0.007018 | 0.63      | 11        | 92673828  | 0.0027   | 5.52E-86   |
| chr11:971:G | A           | G            | A           |              | 0.028     | 0.008594  | 0.268988  | 0.98439  | 11       | 9712626  | 0.027062 | 0.75      | 11        | 9734173   | 0.0028   | 6.46E-24   |
| chr13:112:C | A           | C            | A           |              | -0.0175   | 0.002341  | 0.274908  | 0.238713 | 13       | 1.13E+08 | 0.008053 | 0.77      | 13        | 1.14E+08  | 0.0027   | 1.41E-10   |
| chr15:775:G | A           | G            | A           |              | -0.0201   | -0.00131  | 0.361933  | 0.452209 | 15       | 77581207 | 0.006775 | 0.85      | 15        | 77873549  | 0.0025   | 1.90E-15   |
| chr16:283:T | C           | T            | C           |              | 0.0148    | 0.011676  | 0.424416  | 0.555476 | 16       | 28326722 | 0.006785 | 0.085     | 16        | 28338043  | 0.0025   | 2.11E-09   |
| chr16:537:T | G           | T            | G           |              | 0.0217    | -0.00446  | 0.393744  | 0.848943 | 16       | 53779455 | 0.009623 | 0.64      | 16        | 53813367  | 0.0025   | 3.01E-18   |
| chr16:752:T | G           | T            | G           |              | -0.0256   | -0.01318  | 0.093808  | 0.819885 | 16       | 75213347 | 0.008723 | 0.13      | 16        | 75247245  | 0.0042   | 6.98E-10   |
| chr16:815:T | C           | T            | C           |              | -0.0169   | -0.00035  | 0.301774  | 0.407781 | 16       | 81501185 | 0.007059 | 0.96      | 16        | 81534790  | 0.0027   | 1.87E-10   |
| chr17:377:T | C           | T            | C           |              | -0.0157   | -0.00471  | 0.368934  | 0.247118 | 17       | 37736525 | 0.007868 | 0.55      | 17        | 36096515  | 0.0027   | 3.16E-09   |
| chr17:594:A | C           | A            | C           |              | -0.0274   | -0.00514  | 0.235861  | 0.418828 | 17       | 59419609 | 0.006806 | 0.45      | 17        | 57496970  | 0.0029   | 6.74E-22   |
| chr17:767:T | C           | T            | C           |              | -0.0254   | -0.00213  | 0.125109  | 0.04635  | 17       | 7674797  | 0.016202 | 0.9       | 17        | 7578115   | 0.0036   | 2.95E-12   |
| chr17:767:G | C           | G            | C           |              | -0.0243   | -0.01014  | 0.249945  | 0.449568 | 17       | 7676154  | 0.006827 | 0.14      | 17        | 7579472   | 0.0028   | 3.29E-18   |
| chr17:781:A | T           | A            | T           |              | 0.0171    | 0.000696  | 0.474589  | 0.602305 | 17       | 78134494 | 0.006868 | 0.92      | 17        | 76130575  | 0.0024   | 2.22E-12   |
| chr17:781:G | T           | G            | T           |              | -0.0718   | 0.002686  | 0.032866  | 0.993996 | 17       | 78134906 | 0.042845 | 0.95      | 17        | 76130987  | 0.0068   | 5.07E-26   |
| chr19:128:G | T           | G            | T           |              | -0.0215   | -0.01789  | 0.158898  | 0.927474 | 19       | 12836245 | 0.013267 | 0.18      | 19        | 12947059  | 0.0034   | 1.33E-10   |
| chr19:807:G | C           | G            | C           |              | -0.0154   | -0.00136  | 0.396983  | 0.423391 | 19       | 807442   | 0.006971 | 0.85      | 19        | 807442    | 0.0025   | 7.76E-10   |
| chr2:1688:C | T           | C            | T           |              | 0.0716    | 0.001811  | 0.033323  | 0.73439  | 2        | 1.69E+08 | 0.007643 | 0.81      | 2         | 1.7E+08   | 0.0066   | 3.45E-27   |
| chr20:337:C | T           | C            | T           |              | 0.0244    | 0.024879  | 0.154197  | 0.988713 | 20       | 33720469 | 0.03276  | 0.45      | 20        | 32308275  | 0.0034   | 6.55E-13   |
| chr21:443:C | T           | C            | T           |              | -0.0208   | 0.009015  | 0.197466  | 0.583093 | 21       | 44335477 | 0.006832 | 0.19      | 21        | 45755360  | 0.003    | 8.56E-12   |
| chr22:301:T | C           | T            | C           |              | 0.0319    | -0.00526  | 0.092326  | 0.123439 | 22       | 30194037 | 0.010516 | 0.62      | 22        | 30592069  | 0.0042   | 5.04E-14   |
| chr22:320:T | G           | T            | C           |              | -0.0331   | 0.016207  | 0.081392  | 0.012488 | 22       | 32079891 | 0.031091 | 0.6       | 22        | 32383419  | 0.0045   | 2.15E-13   |
| chr22:370:G | A           | G            | A           |              | 0.0533    | -0.01553  | 0.123571  | 0.950528 | 22       | 37075250 | 0.016083 | 0.33      | 22        | 37471290  | 0.0037   | 6.19E-46   |
| chr22:370:G | A           | G            | A           |              | -0.0378   | 0.007348  | 0.387768  | 0.661864 | 22       | 37098875 | 0.007168 | 0.31      | 22        | 37494915  | 0.0025   | 8.11E-52   |
| chr3:1869:G | A           | G            | A           |              | 0.0203    | 0.000112  | 0.273182  | 0.902017 | 3        | 1.87E+08 | 0.011105 | 0.99      | 3         | 1.87E+08  | 0.0027   | 1.31E-13   |
| chr4:1440:A | C           | A            | C           |              | 0.0314    | -0.0029   | 0.317148  | 0.51633  | 4        | 1.44E+08 | 0.006787 | 0.67      | 4         | 1.45E+08  | 0.0026   | 4.25E-33   |

|              |   |   |   |         |          |          |          |    |          |          |       |    |          |        |           |
|--------------|---|---|---|---------|----------|----------|----------|----|----------|----------|-------|----|----------|--------|-----------|
| chr4:14427 A | G | A | G | -0.0166 | 0.004126 | 0.499459 | 0.556196 | 4  | 1.44E+08 | 0.006706 | 0.54  | 4  | 1.45E+08 | 0.0024 | 1.21E-11  |
| chr4:62815 T | C | T | C | 0.0172  | 0.003217 | 0.337336 | 0.018492 | 4  | 6281526  | 0.023625 | 0.89  | 4  | 6283253  | 0.0026 | 3.25E-11  |
| chr6:1093 G  | A | G | A | -0.0193 | 0.00602  | 0.295123 | 0.831892 | 6  | 1.09E+08 | 0.009332 | 0.52  | 6  | 1.1E+08  | 0.0027 | 6.05E-13  |
| chr6:1351 G  | A | G | A | -0.0313 | -0.00448 | 0.194094 | 0.785543 | 6  | 1.35E+08 | 0.008224 | 0.59  | 6  | 1.35E+08 | 0.0031 | 5.44E-24  |
| chr6:1531 C  | A | C | A | 0.016   | 0.004961 | 0.306299 | 0.34438  | 6  | 1.53E+08 | 0.007141 | 0.49  | 6  | 1.53E+08 | 0.0027 | 1.49E-09  |
| chr6:2533 C  | T | C | T | -0.0346 | -0.00085 | 0.168321 | 0.977185 | 6  | 25331902 | 0.022282 | 0.97  | 6  | 25332130 | 0.0033 | 4.27E-26  |
| chr6:7247 C  | A | C | A | -0.0354 | -0.00456 | 0.186168 | 0.954131 | 6  | 7247111  | 0.016612 | 0.78  | 6  | 7247344  | 0.0032 | 2.77E-29  |
| chr7:4418 C  | A | C | A | -0.0434 | 0.017711 | 0.034377 | 0.993996 | 7  | 44181320 | 0.044601 | 0.69  | 7  | 44220919 | 0.0067 | 8.24E-11  |
| chr7:4427 C  | T | C | G | -0.0423 | 0.012947 | 0.035996 | 0.008165 | 7  | 44276433 | 0.03622  | 0.72  | 7  | 44283661 | 0.0066 | 1.63E-10  |
| chr7:7741 A  | G | A | G | -0.0154 | -0.00815 | 0.326637 | 0.854227 | 7  | 77417785 | 0.00967  | 0.4   | 7  | 77047102 | 0.0026 | 3.40E-09  |
| chr7:9977 C  | T | C | T | 0.05    | -0.06739 | 0.024579 | 0.006004 | 7  | 99774507 | 0.044606 | 0.13  | 7  | 99307972 | 0.008  | 3.86E-10  |
| chr8:1172 G  | T | G | T | -0.0264 | -0.00523 | 0.124607 | 0.106148 | 8  | 1.17E+08 | 0.011237 | 0.64  | 8  | 1.18E+08 | 0.0036 | 4.34E-13  |
| chr8:4136 G  | T | G | T | -0.0236 | -0.00865 | 0.125051 | 0.201729 | 8  | 41367937 | 0.00853  | 0.31  | 8  | 41225456 | 0.0037 | 1.41E-10  |
| chr8:4169 G  | A | A | T | -0.1524 | -0.01363 | 0.034696 | 0.036984 | 8  | 41691393 | 0.018153 | 0.45  | 8  | 41543675 | 0.0067 | 2.69E-113 |
| chr8:4180 T  | G | T | G | -0.0456 | -0.00475 | 0.210612 | 0.644332 | 8  | 41801405 | 0.006983 | 0.5   | 8  | 41658923 | 0.003  | 2.16E-52  |
| chr9:1332 G  | T | G | T | -0.0396 | 0.002558 | 0.060123 | 0.819164 | 9  | 1.33E+08 | 0.009005 | 0.78  | 9  | 1.36E+08 | 0.0049 | 5.94E-16  |
| chr9:1334 G  | C | G | C | -0.0202 | 0.003975 | 0.307614 | 0.29707  | 9  | 1.33E+08 | 0.007489 | 0.6   | 9  | 1.36E+08 | 0.0026 | 1.58E-14  |
| chr9:1372 G  | A | G | A | -0.0268 | -0.01381 | 0.105337 | 0.849183 | 9  | 1.37E+08 | 0.009638 | 0.15  | 9  | 1.4E+08  | 0.0039 | 1.07E-11  |
| chr9:2213 A  | T | A | T | -0.0515 | 0.003621 | 0.136442 | 0.879683 | 9  | 22136490 | 0.010409 | 0.73  | 9  | 22136489 | 0.0036 | 3.81E-47  |
| rs1000778 A  | G | A | G | 0.0174  | -0.00831 | 0.255369 | 0.325168 | 11 | 61887833 | 0.007263 | 0.25  | 11 | 61655305 | 0.0028 | 3.53E-10  |
| rs1006632 G  | A | G | A | -0.0269 | -0.01113 | 0.099397 | 0.587896 | 5  | 14800567 | 0.006818 | 0.1   | 5  | 14800676 | 0.0041 | 3.54E-11  |
| rs1019488 G  | A | G | A | 0.0158  | 0.011678 | 0.448551 | 0.188521 | 2  | 2.26E+08 | 0.00846  | 0.17  | 2  | 2.27E+08 | 0.0025 | 1.30E-10  |
| rs1043192 G  | T | G | T | -0.0171 | -0.00275 | 0.484831 | 0.488953 | 16 | 68805360 | 0.006744 | 0.68  | 16 | 68839263 | 0.0024 | 1.97E-12  |
| rs1047912 C  | T | C | T | 0.021   | -0.0163  | 0.301803 | 0.852305 | 12 | 50745079 | 0.009667 | 0.092 | 12 | 51138862 | 0.0027 | 3.18E-15  |
| rs1052373 C  | T | C | T | 0.0171  | 0.001872 | 0.322463 | 0.310519 | 11 | 47333236 | 0.007262 | 0.8   | 11 | 47354787 | 0.0026 | 6.20E-11  |
| rs1057037 A  | T | A | T | 0.0281  | -0.01563 | 0.079312 | 0.981028 | 21 | 44313984 | 0.024448 | 0.52  | 21 | 45733867 | 0.0045 | 3.03E-10  |
| rs1063729 G  | A | G | A | 0.0171  | -0.00984 | 0.316389 | 0.46926  | 2  | 1.69E+08 | 0.006882 | 0.15  | 2  | 1.7E+08  | 0.0026 | 5.99E-11  |
| rs1075925 T  | C | T | C | -0.0191 | -0.00638 | 0.32364  | 0.550192 | 9  | 1.08E+08 | 0.006666 | 0.34  | 9  | 1.1E+08  | 0.0026 | 1.94E-13  |
| rs1079098 G  | A | G | A | 0.0315  | -0.00733 | 0.057302 | 0.878722 | 19 | 17321868 | 0.010452 | 0.48  | 19 | 17432677 | 0.0052 | 1.69E-09  |
| rs1087574 A  | C | A | C | 0.0383  | 0.005382 | 0.236983 | 0.753122 | 12 | 48124481 | 0.007974 | 0.5   | 12 | 48518264 | 0.0029 | 1.47E-40  |
| rs1099871 A  | C | A | C | 0.0404  | 0.008849 | 0.0527   | 0.4695   | 10 | 69313959 | 0.006717 | 0.19  | 10 | 71073715 | 0.0054 | 6.54E-14  |
| rs1099871 A  | G | A | G | 0.075   | -0.00837 | 0.012003 | 0.961575 | 10 | 69316145 | 0.018206 | 0.65  | 10 | 71075901 | 0.0098 | 1.57E-14  |
| rs1104245 G  | A | G | A | -0.0254 | 0.007603 | 0.235359 | 0.628482 | 11 | 9640056  | 0.007228 | 0.29  | 11 | 9661603  | 0.0029 | 5.78E-19  |
| rs1104275 T  | C | T | C | 0.0188  | -0.00251 | 0.244558 | 0.85951  | 11 | 2128634  | 0.009889 | 0.8   | 11 | 2149864  | 0.0029 | 6.27E-11  |
| rs1106630 A  | G | A | G | -0.0251 | 0.029923 | 0.424376 | 0.985351 | 12 | 1.12E+08 | 0.027851 | 0.28  | 12 | 1.13E+08 | 0.0025 | 8.17E-24  |
| rs1116836 A  | G | A | G | 0.0475  | 0.002534 | 0.112544 | 0.869116 | 12 | 48026930 | 0.010006 | 0.8   | 12 | 48420713 | 0.0038 | 2.74E-35  |
| rs1118709 T  | C | T | C | -0.0228 | 0.029521 | 0.115439 | 0.918828 | 10 | 92614846 | 0.012516 | 0.018 | 10 | 94374603 | 0.0038 | 3.20E-09  |
| rs1119550 C  | G | C | G | -0.0209 | -0.01847 | 0.149206 | 0.947166 | 10 | 1.11E+08 | 0.01432  | 0.2   | 10 | 1.13E+08 | 0.0034 | 8.37E-10  |
| rs1122864 A  | C | A | C | 0.0481  | -0.0347  | 0.027217 | 0.991595 | 17 | 82820524 | 0.037732 | 0.36  | 17 | 80778400 | 0.0075 | 1.27E-10  |
| rs1136425 G  | A | G | A | 0.0349  | 0.063217 | 0.059936 | 0.990874 | 19 | 17098335 | 0.036256 | 0.081 | 19 | 17209145 | 0.0052 | 2.13E-11  |
| rs1145970 T  | C | T | C | -0.0279 | -0.03164 | 0.086905 | 0.01561  | 5  | 88589681 | 0.026762 | 0.24  | 5  | 87780432 | 0.0043 | 9.80E-11  |
| rs1158743 C  | T | C | T | -0.0229 | 0.006507 | 0.128724 | 0.204371 | 1  | 6571371  | 0.00838  | 0.44  | 1  | 6631431  | 0.0036 | 1.48E-10  |
| rs1159741 A  | G | A | G | 0.0494  | 0.004896 | 0.063665 | 0.970701 | 10 | 69343219 | 0.019986 | 0.81  | 10 | 71102975 | 0.0049 | 6.93E-24  |

|           |   |    |   |   |         |          |          |          |    |          |          |       |    |          |        |           |
|-----------|---|----|---|---|---------|----------|----------|----------|----|----------|----------|-------|----|----------|--------|-----------|
| rs1160698 | T | C  | T | C | 0.0175  | 0.017617 | 0.246632 | 0.979347 | 11 | 2822446  | 0.024084 | 0.46  | 11 | 2843676  | 0.0028 | 8.23E-10  |
| rs1162767 | C | A  | A | T | -0.0399 | 0.028453 | 0.042573 | 0.043708 | 14 | 64841755 | 0.017002 | 0.094 | 14 | 65349806 | 0.0061 | 6.47E-11  |
| rs1166764 | G | T  | A | G | 0.0413  | 0.036986 | 0.050162 | 0.019212 | 19 | 44876534 | 0.025232 | 0.14  | 19 | 45381292 | 0.0058 | 9.88E-13  |
| rs1166832 | G | C  | G | C | 0.0203  | 0.058105 | 0.175578 | 0.986311 | 19 | 44895376 | 0.029215 | 0.047 | 19 | 45398633 | 0.0034 | 1.91E-09  |
| rs1167228 | C | T  | C | T | 0.0272  | -0.04785 | 0.11275  | 0.990154 | 19 | 17158700 | 0.03492  | 0.17  | 19 | 17269510 | 0.0039 | 2.56E-12  |
| rs1167239 | A | G  | T | G | 0.0349  | 0.037043 | 0.063537 | 0.019452 | 19 | 44873841 | 0.025081 | 0.14  | 19 | 45372329 | 0.0052 | 2.20E-11  |
| rs1170605 | A | G  | A | G | 0.0335  | 0.013012 | 0.108977 | 0.96806  | 3  | 49026677 | 0.0197   | 0.51  | 3  | 49064110 | 0.004  | 2.74E-17  |
| rs1171513 | G | A  | G | A | 0.0251  | -0.01234 | 0.093827 | 0.749039 | 3  | 50515435 | 0.007874 | 0.12  | 3  | 50552866 | 0.0042 | 2.50E-09  |
| rs1175121 | G | A  | G | A | -0.0477 | -0.04207 | 0.047429 | 0.994957 | 11 | 72838300 | 0.04634  | 0.36  | 11 | 72549345 | 0.0058 | 2.04E-16  |
| rs1177318 | C | T  | C | T | -0.0324 | 0.034959 | 0.070899 | 0.982709 | 10 | 68316137 | 0.026166 | 0.18  | 10 | 70075894 | 0.0048 | 1.54E-11  |
| rs1178545 | G | A  | C | G | 0.0269  | 0.014894 | 0.143507 | 0.008886 | 8  | 1.17E+08 | 0.036707 | 0.68  | 8  | 1.18E+08 | 0.0035 | 2.29E-14  |
| rs1181291 | C | T  | C | T | 0.0349  | -0.05821 | 0.067927 | 0.989673 | 10 | 69241218 | 0.033358 | 0.081 | 10 | 71000974 | 0.0049 | 6.71E-13  |
| rs1181326 | T | C  | T | C | 0.0319  | -0.03192 | 0.053778 | 0.993036 | 16 | 88777595 | 0.041388 | 0.44  | 16 | 88844003 | 0.0054 | 4.23E-09  |
| rs1181756 | T | C  | T | C | 0.0247  | 0.006025 | 0.237133 | 0.961575 | 10 | 69191590 | 0.017967 | 0.74  | 10 | 70951346 | 0.0029 | 2.02E-17  |
| rs1181908 | C | T  | C | T | 0.0369  | -0.00845 | 0.174015 | 0.884246 | 10 | 69298258 | 0.010826 | 0.43  | 10 | 71058014 | 0.0032 | 1.80E-30  |
| rs1191381 | A | G  | G | C | 0.0258  | 0.014944 | 0.130383 | 0.019212 | 22 | 37051006 | 0.023523 | 0.53  | 22 | 37439033 | 0.0037 | 2.02E-12  |
| rs1196453 | G | A  | G | A | -0.0235 | -0.00136 | 0.289283 | 0.822286 | 6  | 1.1E+08  | 0.009041 | 0.88  | 6  | 1.1E+08  | 0.0027 | 3.20E-18  |
| rs1209599 | C | T  | C | T | -0.0379 | 0.004699 | 0.088928 | 0.907541 | 1  | 50926173 | 0.011903 | 0.69  | 1  | 51391845 | 0.0042 | 3.87E-19  |
| rs1219444 | A | G  | A | G | -0.031  | -0.0172  | 0.082833 | 0.989914 | 6  | 24866267 | 0.034539 | 0.62  | 6  | 24866495 | 0.0045 | 5.59E-12  |
| rs1222113 | G | A  | G | A | 0.0299  | -0.00354 | 0.239424 | 0.498319 | 10 | 12211598 | 0.006655 | 0.59  | 10 | 12253597 | 0.0029 | 1.69E-25  |
| rs1222279 | A | G  | A | G | 0.0231  | -0.00187 | 0.449878 | 0.446206 | 11 | 92933881 | 0.006768 | 0.78  | 11 | 92667047 | 0.0024 | 3.24E-21  |
| rs1234214 | C | CA | T | G | -0.0176 | -0.00356 | 0.393029 | 0.448367 | 10 | 87938433 | 0.006911 | 0.61  | 10 | 89655242 | 0.0025 | 2.73E-12  |
| rs1235520 | A | G  | A | G | 0.0361  | -0.01252 | 0.372544 | 0.856868 | 10 | 69329923 | 0.009684 | 0.2   | 10 | 71089679 | 0.0025 | 1.01E-46  |
| rs1241601 | C | T  | C | T | -0.0312 | -0.01785 | 0.158072 | 0.847502 | 10 | 69533948 | 0.009749 | 0.067 | 10 | 71293704 | 0.0034 | 1.62E-20  |
| rs1252957 | G | C  | G | C | -0.0195 | 0.007473 | 0.215363 | 0.825408 | 6  | 1.1E+08  | 0.008951 | 0.4   | 6  | 1.1E+08  | 0.003  | 4.18E-11  |
| rs1292002 | G | C  | G | C | 0.0231  | 0.014388 | 0.10751  | 0.806676 | 16 | 84559765 | 0.008765 | 0.1   | 16 | 84593371 | 0.0039 | 2.61E-09  |
| rs1293259 | G | A  | G | A | 0.0361  | 0.002215 | 0.149225 | 0.804755 | 1  | 25369344 | 0.008417 | 0.79  | 1  | 25695835 | 0.0034 | 1.01E-25  |
| rs1293762 | C | A  | C | A | -0.034  | -0.00653 | 0.153737 | 0.967099 | 17 | 82681872 | 0.018976 | 0.73  | 17 | 80639748 | 0.0034 | 1.43E-23  |
| rs1294990 | T | C  | T | C | -0.0279 | 0.00349  | 0.176325 | 0.821566 | 17 | 28897781 | 0.008874 | 0.69  | 17 | 27224799 | 0.0032 | 1.66E-18  |
| rs1297155 | C | T  | C | T | -0.0465 | -0.00041 | 0.02786  | 0.927233 | 19 | 32679562 | 0.013037 | 0.97  | 19 | 33170468 | 0.0075 | 7.13E-10  |
| rs1297523 | G | C  | G | C | -0.0175 | -0.01081 | 0.284916 | 0.917867 | 19 | 51275698 | 0.012711 | 0.39  | 19 | 51778952 | 0.0027 | 1.14E-10  |
| rs1298332 | T | C  | T | C | 0.0238  | -0.01245 | 0.150107 | 0.737512 | 19 | 17136051 | 0.007605 | 0.1   | 19 | 17246861 | 0.0034 | 2.45E-12  |
| rs1307749 | C | T  | C | T | 0.0334  | 0.009598 | 0.10882  | 0.969501 | 3  | 49276545 | 0.020284 | 0.64  | 3  | 49313978 | 0.0039 | 2.34E-17  |
| rs1309495 | T | C  | T | C | -0.0212 | 0.001719 | 0.20749  | 0.801153 | 3  | 23415589 | 0.008667 | 0.84  | 3  | 23457080 | 0.003  | 1.82E-12  |
| rs1316450 | G | A  | G | A | 0.0252  | -0.01503 | 0.170311 | 0.914265 | 5  | 1.59E+08 | 0.011992 | 0.21  | 5  | 1.58E+08 | 0.0032 | 7.23E-15  |
| rs1320945 | C | T  | C | T | -0.0246 | 0.022485 | 0.146977 | 0.987992 | 6  | 1.09E+08 | 0.031679 | 0.48  | 6  | 1.1E+08  | 0.0035 | 1.39E-12  |
| rs13928   | A | G  | A | G | 0.0193  | -0.00095 | 0.473678 | 0.722142 | 7  | 44114181 | 0.007743 | 0.9   | 7  | 44153780 | 0.0024 | 2.57E-15  |
| rs1497609 | T | C  | T | C | 0.0246  | -0.0013  | 0.353186 | 0.928674 | 4  | 1.44E+08 | 0.012574 | 0.92  | 4  | 1.45E+08 | 0.0026 | 6.12E-22  |
| rs1499517 | A | G  | A | G | 0.0301  | 0.005566 | 0.094997 | 0.961816 | 14 | 64762288 | 0.018136 | 0.76  | 14 | 65229006 | 0.0042 | 4.19E-13  |
| rs1609812 | G | A  | G | A | 0.0196  | -0.00764 | 0.15402  | 0.495437 | 11 | 5225911  | 0.006877 | 0.27  | 11 | 5247141  | 0.0033 | 4.36E-09  |
| rs163168  | T | C  | T | C | 0.0209  | -0.01121 | 0.219668 | 0.364073 | 11 | 2803115  | 0.007014 | 0.11  | 11 | 2824345  | 0.0029 | 1.08E-12  |
| rs1685624 | C | T  | C | T | 0.0759  | 0.007713 | 0.013462 | 0.725985 | 2  | 1.69E+08 | 0.007687 | 0.32  | 2  | 1.7E+08  | 0.0095 | 1.01E-15  |
| rs1692624 | C | T  | C | T | -0.2836 | 0.062263 | 0.13058  | 0.993516 | 10 | 69333636 | 0.042911 | 0.15  | 10 | 71093392 | 0.0036 | 1.00E-200 |

|           |   |   |   |   |         |          |          |          |    |          |          |       |    |          |        |          |
|-----------|---|---|---|---|---------|----------|----------|----------|----|----------|----------|-------|----|----------|--------|----------|
| rs1698841 | T | C | T | C | 0.0349  | 0.006878 | 0.045399 | 0.67243  | 22 | 30221596 | 0.007333 | 0.35  | 22 | 30617585 | 0.0055 | 1.88E-10 |
| rs1712277 | A | G | A | G | 0.0171  | -0.03261 | 0.229714 | 0.949328 | 14 | 22819744 | 0.015459 | 0.035 | 14 | 23288953 | 0.0029 | 3.91E-09 |
| rs1715615 | C | T | C | T | 0.0381  | -0.0193  | 0.079415 | 0.987272 | 11 | 270514   | 0.030221 | 0.52  | 11 | 270514   | 0.0045 | 2.05E-17 |
| rs1722661 | C | A | C | A | 0.0356  | -0.00282 | 0.222587 | 0.882085 | 12 | 48304257 | 0.010466 | 0.79  | 12 | 48698040 | 0.0029 | 3.01E-34 |
| rs174570  | C | T | C | T | -0.0256 | 0.002748 | 0.12827  | 0.423391 | 11 | 61829740 | 0.00655  | 0.67  | 11 | 61597212 | 0.0037 | 2.83E-12 |
| rs1772846 | C | G | C | G | 0.0198  | 0.006687 | 0.294722 | 0.821806 | 22 | 30202563 | 0.00893  | 0.45  | 22 | 30598552 | 0.0027 | 1.54E-13 |
| rs1775015 | C | T | C | T | -0.0251 | 0.009894 | 0.314079 | 0.897214 | 22 | 37101986 | 0.011121 | 0.37  | 22 | 37498026 | 0.0026 | 1.44E-21 |
| rs1864585 | A | G | A | G | 0.0188  | 0.013194 | 0.257345 | 0.030019 | 8  | 10875395 | 0.017892 | 0.46  | 8  | 10732905 | 0.0028 | 1.74E-11 |
| rs1867971 | A | G | A | G | -0.0305 | 0.006109 | 0.218623 | 0.597022 | 10 | 69385730 | 0.007008 | 0.38  | 10 | 71145486 | 0.0029 | 3.16E-25 |
| rs1930261 | A | G | A | G | 0.0163  | -0.01128 | 0.435856 | 0.536263 | 1  | 1.59E+08 | 0.006776 | 0.096 | 1  | 1.59E+08 | 0.0025 | 2.84E-11 |
| rs1975233 | A | C | A | C | -0.0146 | -0.00948 | 0.449562 | 0.642891 | 4  | 1.54E+08 | 0.007043 | 0.18  | 4  | 1.54E+08 | 0.0025 | 3.55E-09 |
| rs2026882 | C | T | C | T | -0.0208 | -0.01412 | 0.160296 | 0.863593 | 21 | 44902938 | 0.010161 | 0.16  | 21 | 46322853 | 0.0033 | 3.62E-10 |
| rs2065500 | A | G | A | G | -0.0259 | -0.00677 | 0.157067 | 0.414745 | 9  | 22145695 | 0.006685 | 0.31  | 9  | 22145694 | 0.0034 | 1.05E-14 |
| rs2071208 | G | A | G | A | -0.0188 | -0.00341 | 0.177788 | 0.240874 | 3  | 50122246 | 0.007982 | 0.67  | 3  | 50159679 | 0.0032 | 3.51E-09 |
| rs2074311 | A | G | A | G | -0.0164 | -0.00236 | 0.413265 | 0.351825 | 11 | 17400313 | 0.007226 | 0.74  | 11 | 17421860 | 0.0025 | 3.61E-11 |
| rs2188553 | G | A | G | A | -0.0179 | -0.01031 | 0.199837 | 0.990394 | 6  | 1.11E+08 | 0.035336 | 0.77  | 6  | 1.11E+08 | 0.003  | 4.25E-09 |
| rs2232328 | C | G | C | G | 0.0422  | 0.003879 | 0.098332 | 0.978146 | 2  | 1.69E+08 | 0.023721 | 0.87  | 2  | 1.7E+08  | 0.0041 | 3.40E-25 |
| rs2235321 | G | A | G | A | -0.0431 | -0.00273 | 0.384312 | 0.57877  | 22 | 37066886 | 0.006874 | 0.69  | 22 | 37462926 | 0.0025 | 1.04E-66 |
| rs2238368 | C | T | C | T | 0.0156  | -0.0055  | 0.461803 | 0.788425 | 16 | 120329   | 0.008381 | 0.51  | 16 | 170328   | 0.0024 | 1.91E-10 |
| rs2269434 | T | C | T | C | 0.0165  | 0.001934 | 0.346476 | 0.31316  | 11 | 47338861 | 0.007249 | 0.79  | 11 | 47360412 | 0.0026 | 1.23E-10 |
| rs2279008 | T | C | T | C | 0.0168  | -0.01032 | 0.251735 | 0.674111 | 19 | 17172493 | 0.00728  | 0.16  | 19 | 17283303 | 0.0028 | 2.27E-09 |
| rs2293941 | G | A | G | A | 0.0342  | 0.008401 | 0.218254 | 0.554035 | 13 | 27917061 | 0.006821 | 0.22  | 13 | 28491198 | 0.0029 | 2.84E-31 |
| rs231362  | A | G | A | G | 0.0205  | 0.014513 | 0.476085 | 0.103746 | 11 | 2670241  | 0.011217 | 0.2   | 11 | 2691471  | 0.0025 | 7.28E-17 |
| rs2384000 | A | G | A | G | 0.0242  | 0.006298 | 0.095157 | 0.194044 | 12 | 1.13E+08 | 0.007956 | 0.43  | 12 | 1.13E+08 | 0.0041 | 2.83E-09 |
| rs2384937 | T | C | T | C | -0.0225 | -0.03169 | 0.120249 | 0.980067 | 16 | 15953968 | 0.023376 | 0.18  | 16 | 16047825 | 0.0037 | 1.43E-09 |
| rs2390731 | G | A | G | A | 0.0508  | -0.04627 | 0.072857 | 0.016811 | 2  | 1.69E+08 | 0.026166 | 0.077 | 2  | 1.7E+08  | 0.0046 | 4.70E-28 |
| rs2394534 | T | G | T | G | 0.0372  | -0.01311 | 0.250317 | 0.9378   | 10 | 69269546 | 0.014261 | 0.36  | 10 | 71029302 | 0.0028 | 3.56E-39 |
| rs2413447 | G | A | G | A | -0.0185 | 0.000837 | 0.445873 | 0.51537  | 22 | 37005491 | 0.006728 | 0.9   | 22 | 37401532 | 0.0025 | 4.66E-14 |
| rs2515236 | A | G | A | G | 0.0156  | -0.00766 | 0.354315 | 0.825648 | 8  | 94922679 | 0.00894  | 0.39  | 8  | 95934907 | 0.0025 | 8.89E-10 |
| rs2526353 | G | T | G | T | 0.0228  | 0.001841 | 0.198501 | 0.634726 | 17 | 59911246 | 0.007035 | 0.79  | 17 | 57988607 | 0.0031 | 9.34E-14 |
| rs2528374 | C | G | C | G | 0.0487  | -0.01145 | 0.050802 | 0.907541 | 7  | 43936949 | 0.011741 | 0.33  | 7  | 43976548 | 0.0056 | 1.85E-18 |
| rs2613518 | A | G | A | G | -0.0162 | -0.00785 | 0.411729 | 0.370797 | 17 | 78118773 | 0.007045 | 0.27  | 17 | 76114854 | 0.0025 | 5.04E-11 |
| rs271043  | G | A | G | A | 0.0347  | -0.00675 | 0.476876 | 0.309798 | 11 | 92993923 | 0.007367 | 0.36  | 11 | 92727089 | 0.0025 | 2.06E-45 |
| rs2731073 | A | G | A | G | -0.0286 | 0.011329 | 0.104308 | 0.044909 | 12 | 48525773 | 0.016604 | 0.5   | 12 | 48919556 | 0.004  | 6.83E-13 |
| rs282595  | G | A | G | A | 0.0478  | -0.0069  | 0.162185 | 0.897935 | 13 | 1.13E+08 | 0.011315 | 0.54  | 13 | 1.13E+08 | 0.0033 | 1.01E-47 |
| rs2864146 | T | C | T | C | 0.0372  | -0.00581 | 0.243855 | 0.045149 | 9  | 1.36E+08 | 0.016194 | 0.72  | 9  | 1.39E+08 | 0.0028 | 1.90E-39 |
| rs2872068 | A | G | A | G | -0.0203 | -0.00202 | 0.161579 | 0.808117 | 3  | 1.71E+08 | 0.008633 | 0.82  | 3  | 1.71E+08 | 0.0033 | 1.00E-09 |
| rs2887944 | G | T | G | T | 0.0148  | 0.010969 | 0.450193 | 0.168588 | 3  | 27716784 | 0.009294 | 0.24  | 3  | 27758275 | 0.0025 | 2.00E-09 |
| rs2954038 | C | A | C | A | 0.016   | 0.010541 | 0.29975  | 0.28074  | 8  | 1.25E+08 | 0.007517 | 0.16  | 8  | 1.27E+08 | 0.0027 | 1.87E-09 |
| rs2971681 | A | G | A | G | 0.0348  | 0.0146   | 0.163644 | 0.604467 | 7  | 44143588 | 0.006897 | 0.034 | 7  | 44183187 | 0.0033 | 1.43E-26 |
| rs2998005 | A | G | A | G | 0.0203  | -0.00416 | 0.152799 | 0.227666 | 10 | 69040867 | 0.008123 | 0.61  | 10 | 70800623 | 0.0034 | 1.74E-09 |
| rs3217833 | A | G | A | G | 0.0217  | -0.00603 | 0.151202 | 0.251201 | 12 | 4284308  | 0.007965 | 0.45  | 12 | 4393474  | 0.0034 | 1.33E-10 |
| rs3217843 | G | T | G | T | 0.0216  | -0.00928 | 0.143298 | 0.848223 | 12 | 4286699  | 0.009455 | 0.33  | 12 | 4395865  | 0.0035 | 6.81E-10 |

|           |   |   |   |   |         |          |          |          |    |          |          |       |    |          |        |           |
|-----------|---|---|---|---|---------|----------|----------|----------|----|----------|----------|-------|----|----------|--------|-----------|
| rs3217863 | C | T | C | T | 0.0287  | -0.00238 | 0.074674 | 0.706052 | 12 | 4290330  | 0.007516 | 0.75  | 12 | 4399496  | 0.0047 | 7.31E-10  |
| rs3447934 | G | A | G | A | -0.0241 | 0.004619 | 0.116508 | 0.76537  | 17 | 28997922 | 0.008267 | 0.58  | 17 | 27324940 | 0.0038 | 1.52E-10  |
| rs3482381 | G | A | G | A | 0.0345  | 0.000802 | 0.102471 | 0.975745 | 3  | 49712543 | 0.022127 | 0.97  | 3  | 49749976 | 0.0041 | 2.16E-17  |
| rs3503188 | C | A | C | A | 0.0196  | 0.002079 | 0.187186 | 0.982229 | 12 | 50383790 | 0.024595 | 0.93  | 12 | 50777573 | 0.0032 | 4.89E-10  |
| rs3516979 | C | T | C | T | 0.0329  | 0.051701 | 0.06389  | 0.987272 | 11 | 64263769 | 0.030231 | 0.087 | 11 | 64031241 | 0.005  | 5.38E-11  |
| rs3573282 | C | A | C | A | 0.0218  | 0.007192 | 0.162655 | 0.986551 | 17 | 46755851 | 0.028947 | 0.8   | 17 | 44833217 | 0.0033 | 6.55E-11  |
| rs3608435 | G | A | G | A | -0.0267 | -0.00587 | 0.09242  | 0.963977 | 19 | 1079960  | 0.018493 | 0.75  | 19 | 1079959  | 0.0043 | 3.97E-10  |
| rs3621174 | T | C | T | C | 0.0417  | -0.00921 | 0.478929 | 0.554515 | 4  | 1.44E+08 | 0.006909 | 0.18  | 4  | 1.45E+08 | 0.0024 | 2.46E-65  |
| rs3729931 | G | A | G | A | -0.0234 | 0.005398 | 0.359383 | 0.92243  | 3  | 12585017 | 0.012606 | 0.67  | 3  | 12626516 | 0.0025 | 2.72E-20  |
| rs3731211 | T | A | T | A | 0.022   | 0.005985 | 0.278913 | 0.205091 | 9  | 21986848 | 0.008456 | 0.48  | 9  | 21986847 | 0.0027 | 5.98E-16  |
| rs3731620 | G | A | G | A | -0.0274 | 0.025674 | 0.142974 | 0.941403 | 2  | 24039190 | 0.014371 | 0.074 | 2  | 24262060 | 0.0035 | 3.87E-15  |
| rs3744802 | G | A | G | A | -0.0156 | -0.00022 | 0.462572 | 0.563641 | 17 | 78797518 | 0.006958 | 0.97  | 17 | 76793600 | 0.0025 | 2.29E-10  |
| rs3751120 | C | T | C | T | 0.0285  | -0.00403 | 0.068699 | 0.490394 | 11 | 64116981 | 0.006759 | 0.55  | 11 | 63884453 | 0.0046 | 8.16E-10  |
| rs3757972 | C | T | C | T | 0.0206  | 0.000208 | 0.379636 | 0.505043 | 8  | 1.44E+08 | 0.00686  | 0.98  | 8  | 1.46E+08 | 0.0025 | 2.73E-16  |
| rs3794738 | C | T | C | T | -0.0539 | -0.00858 | 0.078033 | 0.857589 | 17 | 78123212 | 0.009683 | 0.38  | 17 | 76119293 | 0.0046 | 4.28E-32  |
| rs3811444 | C | T | C | T | 0.026   | 0.003563 | 0.332885 | 0.748319 | 1  | 2.48E+08 | 0.00786  | 0.65  | 1  | 2.48E+08 | 0.0026 | 9.77E-24  |
| rs3813026 | A | G | A | G | 0.0498  | -0.00713 | 0.070204 | 0.951489 | 17 | 78127447 | 0.015951 | 0.66  | 17 | 76123528 | 0.0047 | 7.76E-26  |
| rs3842752 | G | A | G | A | 0.025   | -0.02926 | 0.22752  | 0.957733 | 11 | 2159843  | 0.016625 | 0.078 | 11 | 2181073  | 0.0029 | 1.15E-17  |
| rs3857286 | C | T | C | T | -0.0159 | 0.008736 | 0.300748 | 0.341258 | 5  | 55567362 | 0.007137 | 0.22  | 5  | 54863190 | 0.0027 | 2.58E-09  |
| rs3887417 | G | A | G | A | 0.0254  | -0.00663 | 0.130804 | 0.188761 | 17 | 78257576 | 0.008768 | 0.45  | 17 | 76253657 | 0.0036 | 1.19E-12  |
| rs4073729 | G | A | G | A | 0.0304  | -0.01426 | 0.150868 | 0.713737 | 12 | 47943286 | 0.007442 | 0.055 | 12 | 48337069 | 0.0034 | 2.68E-19  |
| rs4127080 | A | C | A | C | 0.0209  | -0.00164 | 0.212175 | 0.81268  | 1  | 39336143 | 0.008722 | 0.85  | 1  | 39801815 | 0.003  | 3.77E-12  |
| rs4127850 | T | G | T | G | -0.0485 | 0.035883 | 0.04641  | 0.992555 | 10 | 68344810 | 0.038786 | 0.35  | 10 | 70104567 | 0.0059 | 1.62E-16  |
| rs4130267 | T | G | T | G | 0.038   | 0.0026   | 0.091125 | 0.98391  | 9  | 1.33E+08 | 0.027516 | 0.92  | 9  | 1.36E+08 | 0.0043 | 6.27E-19  |
| rs4135275 | A | G | A | G | 0.0273  | -0.00125 | 0.202443 | 0.522094 | 3  | 12402345 | 0.006812 | 0.85  | 3  | 12443844 | 0.003  | 2.74E-19  |
| rs4145930 | G | A | G | A | 0.0272  | 0.001915 | 0.110104 | 0.240874 | 10 | 69238982 | 0.007924 | 0.81  | 10 | 70998738 | 0.0038 | 1.22E-12  |
| rs4148157 | G | A | G | A | 0.0275  | 0.005717 | 0.098321 | 0.75024  | 4  | 88099782 | 0.00792  | 0.47  | 4  | 89020934 | 0.0041 | 2.48E-11  |
| rs4148796 | A | G | A | G | 0.0192  | -0.00176 | 0.253474 | 0.660663 | 2  | 1.69E+08 | 0.007152 | 0.81  | 2  | 1.7E+08  | 0.0028 | 6.25E-12  |
| rs4227    | G | T | G | T | 0.0174  | 0.002368 | 0.276619 | 0.231508 | 17 | 7587859  | 0.008149 | 0.77  | 17 | 7491177  | 0.0027 | 1.63E-10  |
| rs4279506 | G | C | G | C | -0.0152 | 0.01326  | 0.382513 | 0.149856 | 7  | 23473277 | 0.008938 | 0.14  | 7  | 23512896 | 0.0025 | 1.99E-09  |
| rs4282786 | G | A | G | A | -0.0255 | -0.00422 | 0.261194 | 0.683477 | 1  | 2.14E+08 | 0.007314 | 0.56  | 1  | 2.14E+08 | 0.0028 | 4.85E-20  |
| rs4420638 | A | G | A | G | -0.0203 | -0.00551 | 0.191028 | 0.895293 | 19 | 44919689 | 0.011151 | 0.62  | 19 | 45422946 | 0.0031 | 6.31E-11  |
| rs4432643 | C | T | C | T | 0.0244  | 0.021388 | 0.139102 | 0.790106 | 3  | 1.71E+08 | 0.008498 | 0.012 | 3  | 1.7E+08  | 0.0035 | 6.10E-12  |
| rs454139  | T | C | T | C | 0.0952  | -0.00134 | 0.12218  | 0.81196  | 17 | 78130013 | 0.008757 | 0.88  | 17 | 76126094 | 0.0037 | 4.25E-146 |
| rs4665630 | C | T | C | T | 0.0228  | -0.01495 | 0.111498 | 0.011287 | 2  | 23675447 | 0.030791 | 0.63  | 2  | 23898317 | 0.0038 | 2.66E-09  |
| rs4688992 | C | G | C | G | 0.0165  | 0.008605 | 0.330412 | 0.020413 | 4  | 6315193  | 0.024244 | 0.72  | 4  | 6316920  | 0.0026 | 2.21E-10  |
| rs4731120 | A | C | A | C | -0.0494 | 0.006708 | 0.080614 | 0.877041 | 7  | 1.24E+08 | 0.010254 | 0.51  | 7  | 1.23E+08 | 0.0045 | 1.10E-27  |
| rs4812829 | G | A | G | A | 0.0221  | -0.00174 | 0.158702 | 0.576129 | 20 | 44360627 | 0.006932 | 0.8   | 20 | 42989267 | 0.0033 | 2.59E-11  |
| rs4889651 | A | G | A | G | -0.0201 | -0.00612 | 0.261869 | 0.157541 | 16 | 30884224 | 0.008464 | 0.47  | 16 | 30895545 | 0.0029 | 6.63E-12  |
| rs4894799 | G | A | G | A | 0.0266  | -0.00649 | 0.371809 | 0.223103 | 3  | 1.72E+08 | 0.0081   | 0.42  | 3  | 1.72E+08 | 0.0025 | 3.89E-26  |
| rs5030915 | A | G | A | G | -0.067  | 0.022812 | 0.022353 | 0.991595 | 10 | 69384500 | 0.036671 | 0.53  | 10 | 71144256 | 0.0083 | 5.41E-16  |
| rs520161  | T | C | T | C | -0.02   | -0.00528 | 0.299578 | 0.23511  | 7  | 28171041 | 0.007954 | 0.51  | 7  | 28210660 | 0.0027 | 5.49E-14  |
| rs5587333 | C | T | C | T | 0.0348  | 0.011377 | 0.102705 | 0.970941 | 3  | 49559622 | 0.020055 | 0.57  | 3  | 49597055 | 0.0041 | 1.02E-17  |

|           |   |   |   |   |         |           |          |          |    |          |          |       |    |          |        |           |
|-----------|---|---|---|---|---------|-----------|----------|----------|----|----------|----------|-------|----|----------|--------|-----------|
| rs5604960 | C | G | C | G | -0.029  | 0.020881  | 0.222255 | 0.986551 | 3  | 49547810 | 0.02945  | 0.48  | 3  | 49585243 | 0.003  | 1.53E-22  |
| rs569805  | A | T | A | T | 0.0913  | -0.00905  | 0.353966 | 0.042507 | 2  | 1.69E+08 | 0.016798 | 0.59  | 2  | 1.7E+08  | 0.0026 | 1.00E-200 |
| rs5758922 | T | C | T | C | 0.0153  | -0.00135  | 0.488752 | 0.82829  | 22 | 42764750 | 0.008859 | 0.88  | 22 | 43160756 | 0.0024 | 3.51E-10  |
| rs5763560 | C | T | C | T | -0.03   | 0.007438  | 0.093301 | 0.987512 | 22 | 29862778 | 0.029394 | 0.8   | 22 | 30221120 | 0.0042 | 1.19E-12  |
| rs5774058 | T | G | T | G | -0.0269 | 0.007065  | 0.238342 | 0.82829  | 3  | 1.71E+08 | 0.009128 | 0.44  | 3  | 1.71E+08 | 0.0029 | 4.86E-21  |
| rs5805308 | T | G | T | G | -0.0429 | 0.001517  | 0.071016 | 0.915226 | 7  | 44193014 | 0.012439 | 0.9   | 7  | 44232613 | 0.0047 | 1.30E-19  |
| rs584007  | A | G | A | G | -0.023  | -0.00873  | 0.355942 | 0.577329 | 19 | 44913221 | 0.006813 | 0.2   | 19 | 45416478 | 0.0027 | 1.01E-17  |
| rs6023895 | A | G | A | G | -0.0174 | -0.00643  | 0.234044 | 0.786263 | 7  | 1874714  | 0.008504 | 0.45  | 7  | 1914350  | 0.0029 | 2.52E-09  |
| rs603424  | G | A | G | A | 0.0207  | -0.00914  | 0.168952 | 0.885207 | 10 | 1E+08    | 0.010036 | 0.36  | 10 | 1.02E+08 | 0.0032 | 9.75E-11  |
| rs6179107 | T | C | T | A | -0.0586 | 0.030669  | 0.016173 | 0.013689 | 3  | 1.71E+08 | 0.028242 | 0.28  | 3  | 1.71E+08 | 0.0095 | 5.48E-10  |
| rs6196107 | A | G | A | G | 0.04    | -0.02815  | 0.04643  | 0.98391  | 13 | 1.13E+08 | 0.027068 | 0.3   | 13 | 1.13E+08 | 0.0059 | 8.55E-12  |
| rs6257822 | G | A | G | A | 0.0326  | -0.06107  | 0.074083 | 0.991114 | 9  | 1.33E+08 | 0.036744 | 0.097 | 9  | 1.36E+08 | 0.0047 | 5.85E-12  |
| rs632057  | T | G | T | G | -0.0199 | -0.01029  | 0.371909 | 0.630163 | 6  | 1.4E+08  | 0.006839 | 0.13  | 6  | 1.4E+08  | 0.0025 | 2.82E-15  |
| rs653178  | C | T | C | T | 0.0286  | -0.02554  | 0.482445 | 0.013209 | 12 | 1.12E+08 | 0.028716 | 0.37  | 12 | 1.12E+08 | 0.0025 | 4.37E-31  |
| rs6598057 | C | T | C | T | 0.024   | -0.03115  | 0.156956 | 0.028098 | 11 | 251034   | 0.020866 | 0.14  | 11 | 251034   | 0.0034 | 1.17E-12  |
| rs6686424 | G | A | G | A | 0.0537  | -0.01004  | 0.021632 | 0.017291 | 1  | 2.14E+08 | 0.026163 | 0.7   | 1  | 2.14E+08 | 0.0084 | 1.96E-10  |
| rs6709302 | G | A | G | A | -0.0182 | -0.00922  | 0.328303 | 0.977906 | 2  | 60500494 | 0.021924 | 0.67  | 2  | 60727629 | 0.0026 | 2.60E-12  |
| rs6731171 | T | A | T | A | 0.0162  | -0.0082   | 0.380959 | 0.288665 | 2  | 2.01E+08 | 0.007644 | 0.28  | 2  | 2.02E+08 | 0.0026 | 2.04E-10  |
| rs6760053 | C | G | C | G | -0.0144 | -0.01431  | 0.454377 | 0.617195 | 2  | 1.11E+08 | 0.006969 | 0.04  | 2  | 1.12E+08 | 0.0024 | 3.66E-09  |
| rs6772452 | T | C | T | C | 0.0277  | 0.000765  | 0.23245  | 0.016571 | 3  | 49003029 | 0.027111 | 0.98  | 3  | 49054692 | 0.0029 | 2.03E-21  |
| rs6840504 | C | T | C | T | 0.0178  | -0.00026  | 0.450645 | 0.64121  | 4  | 18203479 | 0.007128 | 0.97  | 4  | 18205102 | 0.0025 | 4.30E-13  |
| rs6844670 | A | G | A | G | 0.0476  | -0.0066   | 0.338219 | 0.428674 | 4  | 1.44E+08 | 0.006899 | 0.34  | 4  | 1.45E+08 | 0.0026 | 3.09E-77  |
| rs6885904 | G | A | G | A | -0.0225 | 0.004058  | 0.444817 | 0.542988 | 5  | 77143425 | 0.007002 | 0.56  | 5  | 76439250 | 0.0025 | 5.41E-20  |
| rs6974831 | A | G | A | G | 0.0466  | -0.00519  | 0.039353 | 0.955091 | 7  | 99533982 | 0.016491 | 0.75  | 7  | 99131605 | 0.0061 | 2.10E-14  |
| rs7018475 | T | G | T | G | 0.0276  | 0.004759  | 0.255123 | 0.654419 | 9  | 22137686 | 0.007207 | 0.51  | 9  | 22137685 | 0.0028 | 3.44E-23  |
| rs703143  | G | A | G | A | 0.0359  | -0.00662  | 0.382476 | 0.566763 | 1  | 1.59E+08 | 0.006875 | 0.34  | 1  | 1.59E+08 | 0.0025 | 5.22E-46  |
| rs7076989 | A | G | A | G | -0.0154 | -0.02179  | 0.332781 | 0.90658  | 10 | 3095280  | 0.01186  | 0.066 | 10 | 3137472  | 0.0026 | 3.21E-09  |
| rs7081062 | G | A | G | A | 0.0271  | -0.0023   | 0.374919 | 0.330211 | 10 | 1.13E+08 | 0.007245 | 0.75  | 10 | 1.15E+08 | 0.0025 | 5.49E-27  |
| rs7090788 | C | A | C | A | -0.0418 | -0.00137  | 0.07742  | 0.626081 | 10 | 69453894 | 0.006963 | 0.84  | 10 | 71213650 | 0.0045 | 2.41E-20  |
| rs7129781 | T | C | T | C | 0.0271  | -0.00099  | 0.078073 | 0.824448 | 11 | 14890871 | 0.008815 | 0.91  | 11 | 14912417 | 0.0045 | 1.58E-09  |
| rs7155671 | C | T | C | T | 0.0276  | -0.01237  | 0.090616 | 0.969981 | 7  | 73440219 | 0.019456 | 0.52  | 7  | 72854549 | 0.0043 | 1.22E-10  |
| rs7196626 | G | A | G | A | -0.0241 | -0.00247  | 0.243048 | 0.216859 | 16 | 68655516 | 0.008124 | 0.76  | 16 | 68689419 | 0.0028 | 2.72E-17  |
| rs7255902 | A | G | A | G | -0.0314 | -9.81E-05 | 0.277207 | 0.587176 | 19 | 17128883 | 0.006926 | 0.99  | 19 | 17239693 | 0.0027 | 1.64E-30  |
| rs7256794 | T | C | T | C | 0.0373  | 0.00328   | 0.037737 | 0.987272 | 19 | 12864794 | 0.030219 | 0.91  | 19 | 12975608 | 0.0063 | 3.79E-09  |
| rs7274421 | G | A | G | A | 0.034   | 0.014549  | 0.09174  | 0.012728 | 9  | 77270084 | 0.029227 | 0.62  | 9  | 79919444 | 0.0042 | 1.11E-15  |
| rs7274761 | G | A | G | A | -0.0175 | 0.02056   | 0.218846 | 0.005524 | 5  | 34501273 | 0.044495 | 0.64  | 5  | 34507418 | 0.0029 | 2.83E-09  |
| rs7278010 | A | C | A | C | 0.0518  | -0.00609  | 0.090433 | 0.942603 | 2  | 23761964 | 0.015145 | 0.69  | 2  | 23984834 | 0.0043 | 1.30E-33  |
| rs7279427 | C | T | C | T | -0.0269 | -0.00311  | 0.077252 | 0.810999 | 2  | 23669453 | 0.008528 | 0.72  | 2  | 23892323 | 0.0046 | 3.46E-09  |
| rs7281422 | C | T | C | T | 0.0396  | -0.00341  | 0.145421 | 0.158501 | 10 | 69240373 | 0.009294 | 0.71  | 10 | 71007677 | 0.0035 | 3.85E-30  |
| rs7285197 | G | C | G | C | 0.036   | 0.003714  | 0.081199 | 0.672911 | 17 | 83060131 | 0.00708  | 0.6   | 17 | 81018007 | 0.0045 | 8.78E-16  |
| rs7285432 | G | A | G | A | 0.0585  | -0.00689  | 0.09563  | 0.969741 | 17 | 82746355 | 0.019838 | 0.73  | 17 | 80704231 | 0.0042 | 2.40E-44  |
| rs7286283 | C | T | C | T | -0.025  | -0.01445  | 0.313088 | 0.719981 | 17 | 82963611 | 0.007576 | 0.056 | 17 | 80921487 | 0.0026 | 3.02E-21  |
| rs7289783 | C | T | C | T | 0.0284  | 0.003235  | 0.094033 | 0.010567 | 17 | 78202506 | 0.032266 | 0.92  | 17 | 76200965 | 0.0042 | 1.22E-11  |

|           |    |   |   |   |         |          |          |          |    |          |          |        |    |          |        |           |
|-----------|----|---|---|---|---------|----------|----------|----------|----|----------|----------|--------|----|----------|--------|-----------|
| rs7297302 | A  | C | A | C | 0.0194  | -0.00465 | 0.166525 | 0.96806  | 19 | 3341453  | 0.019523 | 0.81   | 19 | 3341451  | 0.0033 | 3.20E-09  |
| rs7301872 | A  | G | A | G | 0.058   | 0.014679 | 0.051902 | 0.993276 | 2  | 1.69E+08 | 0.040671 | 0.72   | 2  | 1.7E+08  | 0.0054 | 6.45E-27  |
| rs730497  | G  | A | G | A | 0.1124  | 0.009388 | 0.177842 | 0.827329 | 7  | 44184122 | 0.008946 | 0.29   | 7  | 44223721 | 0.0032 | 1.00E-200 |
| rs7305283 | A  | C | A | C | 0.0231  | 0.024308 | 0.112976 | 0.985831 | 19 | 51657512 | 0.028764 | 0.4    | 19 | 52160765 | 0.0039 | 2.19E-09  |
| rs730566  | C  | A | C | A | -0.0174 | -0.00518 | 0.259618 | 0.383045 | 3  | 48445644 | 0.007001 | 0.46   | 3  | 48487048 | 0.0028 | 3.93E-10  |
| rs7311287 | T  | C | T | C | -0.0382 | -0.00633 | 0.045587 | 0.784102 | 12 | 48584516 | 0.008424 | 0.45   | 12 | 48978299 | 0.0057 | 1.58E-11  |
| rs7337494 | CT | C | C | T | -0.0568 | -0.00038 | 0.021925 | 0.183958 | 17 | 78116884 | 0.00876  | 0.97   | 17 | 76115478 | 0.0081 | 1.78E-12  |
| rs734312  | G  | A | G | A | 0.0162  | -0.00504 | 0.457357 | 0.204131 | 4  | 6301627  | 0.008358 | 0.55   | 4  | 6303354  | 0.0025 | 4.29E-11  |
| rs7405821 | G  | A | G | A | 0.0334  | -0.0047  | 0.05724  | 0.982229 | 14 | 64755499 | 0.026197 | 0.86   | 14 | 65222217 | 0.0052 | 1.62E-10  |
| rs7433381 | C  | T | C | T | -0.0382 | -0.00155 | 0.156061 | 0.919068 | 11 | 72746442 | 0.012603 | 0.9    | 11 | 72457487 | 0.0034 | 8.52E-30  |
| rs7515142 | T  | C | T | C | 0.0565  | -0.03819 | 0.015199 | 0.972863 | 12 | 6996714  | 0.021018 | 0.069  | 12 | 7104806  | 0.0093 | 1.26E-09  |
| rs7572278 | T  | A | T | A | 0.0282  | 0.008779 | 0.204031 | 0.832373 | 2  | 8422899  | 0.009208 | 0.34   | 2  | 8563029  | 0.003  | 9.86E-21  |
| rs7594415 | G  | A | G | A | 0.0366  | 0.000392 | 0.094609 | 0.936599 | 14 | 64815589 | 0.014151 | 0.98   | 14 | 65282307 | 0.0042 | 1.39E-18  |
| rs7636294 | G  | C | G | C | 0.0274  | 0.00813  | 0.123323 | 0.008165 | 3  | 49831371 | 0.038278 | 0.83   | 3  | 49868804 | 0.0038 | 3.30E-13  |
| rs7682793 | T  | C | T | C | 0.0329  | -0.04312 | 0.054448 | 0.951729 | 1  | 1.08E+08 | 0.015615 | 0.0058 | 1  | 1.09E+08 | 0.0054 | 1.03E-09  |
| rs769449  | G  | A | G | A | -0.0231 | -0.00692 | 0.126903 | 0.923631 | 19 | 44906745 | 0.012974 | 0.59   | 19 | 45410002 | 0.0037 | 4.79E-10  |
| rs7742267 | T  | C | T | C | 0.0416  | 0.004196 | 0.03212  | 0.778578 | 12 | 1.23E+08 | 0.008189 | 0.61   | 12 | 1.23E+08 | 0.0068 | 1.06E-09  |
| rs7760225 | T  | C | T | C | 0.0362  | 0.003712 | 0.059579 | 0.899135 | 10 | 69351910 | 0.011251 | 0.74   | 10 | 71111666 | 0.0051 | 7.67E-13  |
| rs7760783 | T  | C | T | C | -0.0401 | 0.012556 | 0.035342 | 0.868876 | 10 | 69262987 | 0.010136 | 0.22   | 10 | 71022743 | 0.0066 | 9.13E-10  |
| rs7769970 | C  | T | C | T | -0.0379 | 0.017242 | 0.056842 | 0.962296 | 12 | 97451205 | 0.018122 | 0.34   | 12 | 97851002 | 0.0053 | 7.12E-13  |
| rs7798781 | G  | T | G | T | -0.0289 | -0.00225 | 0.078399 | 0.930596 | 4  | 1.57E+08 | 0.013551 | 0.87   | 4  | 1.58E+08 | 0.0046 | 3.28E-10  |
| rs780094  | T  | C | T | C | 0.0279  | -0.00412 | 0.381035 | 0.451969 | 2  | 27518370 | 0.00683  | 0.55   | 2  | 27741237 | 0.0025 | 1.06E-28  |
| rs7807030 | A  | C | A | C | -0.0572 | 0.005721 | 0.08862  | 0.961095 | 2  | 43628011 | 0.017638 | 0.75   | 2  | 43855150 | 0.0043 | 2.49E-40  |
| rs7834392 | C  | T | C | T | 0.0378  | -0.01689 | 0.043671 | 0.954851 | 1  | 1.68E+08 | 0.016447 | 0.3    | 1  | 1.68E+08 | 0.0059 | 2.07E-10  |
| rs7836908 | G  | A | G | A | -0.04   | 0.008239 | 0.03866  | 0.848943 | 16 | 194786   | 0.009767 | 0.4    | 16 | 244785   | 0.0063 | 2.18E-10  |
| rs7843297 | C  | T | C | T | -0.0541 | 0.034095 | 0.055619 | 0.988713 | 9  | 22132577 | 0.032688 | 0.3    | 9  | 22132576 | 0.0054 | 1.33E-23  |
| rs7847715 | G  | A | G | A | -0.0254 | -0.03919 | 0.11059  | 0.004563 | 3  | 1.52E+08 | 0.048642 | 0.42   | 3  | 1.52E+08 | 0.0039 | 7.62E-11  |
| rs7871226 | C  | T | T | G | -0.0335 | 0.011453 | 0.102893 | 0.023055 | 12 | 54205482 | 0.021184 | 0.59   | 12 | 54649978 | 0.004  | 5.89E-17  |
| rs7923811 | C  | T | C | T | 0.0239  | -0.04435 | 0.136229 | 0.965658 | 3  | 1.72E+08 | 0.018508 | 0.017  | 3  | 1.72E+08 | 0.0036 | 2.43E-11  |
| rs7948798 | G  | A | G | A | -0.0292 | 0.019773 | 0.074024 | 0.819645 | 11 | 1.19E+08 | 0.008943 | 0.027  | 11 | 1.19E+08 | 0.0045 | 1.10E-10  |
| rs7970284 | C  | G | C | G | 0.0487  | -0.04402 | 0.046778 | 0.973823 | 17 | 77898604 | 0.021366 | 0.039  | 17 | 75894686 | 0.0058 | 2.49E-17  |
| rs7984515 | A  | G | A | G | 0.0288  | -0.00732 | 0.196355 | 0.887128 | 13 | 32992027 | 0.010649 | 0.49   | 13 | 33566165 | 0.0031 | 4.96E-21  |
| rs7985325 | C  | T | C | T | -0.0396 | -0.01519 | 0.187998 | 0.190922 | 13 | 1.14E+08 | 0.00867  | 0.08   | 13 | 1.15E+08 | 0.0031 | 2.55E-36  |
| rs8005181 | T  | C | T | C | 0.0173  | 0.011441 | 0.326055 | 0.971182 | 2  | 27368937 | 0.019508 | 0.56   | 2  | 27591804 | 0.0026 | 4.20E-11  |
| rs8059048 | A  | G | A | G | -0.021  | 0.001237 | 0.179865 | 0.363833 | 16 | 88714632 | 0.006811 | 0.86   | 16 | 88781040 | 0.0032 | 3.09E-11  |
| rs8126070 | A  | G | A | G | -0.0199 | -0.00485 | 0.176841 | 0.908501 | 20 | 8624657  | 0.011178 | 0.68   | 20 | 8605304  | 0.0032 | 5.73E-10  |
| rs854793  | G  | A | G | A | 0.0246  | 0.007134 | 0.227547 | 0.690682 | 17 | 18127210 | 0.007412 | 0.34   | 17 | 18030524 | 0.0029 | 1.44E-17  |
| rs895636  | C  | T | C | T | 0.0221  | -0.00784 | 0.203145 | 0.586695 | 2  | 44961214 | 0.007027 | 0.26   | 2  | 45188353 | 0.003  | 1.96E-13  |
| rs906220  | A  | G | A | G | 0.1257  | -0.05121 | 0.073092 | 0.021854 | 10 | 69300854 | 0.023478 | 0.029  | 10 | 71060610 | 0.0046 | 7.98E-166 |
| rs9398642 | C  | T | C | T | -0.0217 | -0.00429 | 0.139536 | 0.800913 | 6  | 1.22E+08 | 0.008411 | 0.61   | 6  | 1.22E+08 | 0.0035 | 5.33E-10  |
| rs9438901 | G  | A | G | A | -0.0373 | 0.010531 | 0.141912 | 0.104227 | 1  | 25258485 | 0.011299 | 0.35   | 1  | 25584976 | 0.0035 | 2.96E-26  |
| rs9577924 | A  | G | A | G | 0.0378  | -0.00287 | 0.259538 | 0.751681 | 13 | 1.14E+08 | 0.007779 | 0.71   | 13 | 1.15E+08 | 0.0028 | 8.39E-43  |
| rs9579135 | A  | G | A | G | 0.0227  | -0.00143 | 0.299535 | 0.6561   | 13 | 27959601 | 0.007048 | 0.84   | 13 | 28533738 | 0.0027 | 1.71E-17  |

|           |   |   |   |   |         |          |          |          |    |          |          |      |    |          |        |          |
|-----------|---|---|---|---|---------|----------|----------|----------|----|----------|----------|------|----|----------|--------|----------|
| rs9590217 | C | T | C | T | 0.0163  | 0.002495 | 0.464168 | 0.517531 | 9  | 1.33E+08 | 0.006799 | 0.71 | 9  | 1.36E+08 | 0.0024 | 2.36E-11 |
| rs9790301 | T | C | T | C | 0.0213  | -0.0053  | 0.191058 | 0.479587 | 3  | 1.23E+08 | 0.006682 | 0.43 | 3  | 1.23E+08 | 0.0031 | 6.06E-12 |
| rs9832454 | G | T | A | G | 0.0328  | -0.00904 | 0.086239 | 0.038905 | 3  | 50180125 | 0.017115 | 0.6  | 3  | 50189531 | 0.0044 | 9.16E-14 |
| rs9871778 | C | T | C | T | -0.0217 | 0.059044 | 0.130645 | 0.008405 | 3  | 1.77E+08 | 0.036688 | 0.11 | 3  | 1.77E+08 | 0.0036 | 1.77E-09 |
| rs9901502 | T | C | T | C | -0.0348 | -0.00099 | 0.356623 | 0.451249 | 17 | 83013225 | 0.006815 | 0.88 | 17 | 80971101 | 0.0025 | 2.13E-42 |
| rs9921085 | G | A | G | A | 0.0554  | -0.00372 | 0.184602 | 0.814121 | 9  | 1.33E+08 | 0.008722 | 0.67 | 9  | 1.36E+08 | 0.0032 | 4.58E-68 |



Supplementary Table 2e. List of SNPs for Insulin Resistance (HOMA-IR) and their effects on TEWL

| SNP         | effect_alle | other_allele | effect_alle | other_allele | beta.HOM | beta.TEWL | eaf.HOMA | eaf.TEWL | chr.TEWL | pos.TEWL | se.TEWL  | pval.TEWL | chr.HOMA | pos.HOMA | se.HOMA | pval.HOMA_IR |
|-------------|-------------|--------------|-------------|--------------|----------|-----------|----------|----------|----------|----------|----------|-----------|----------|----------|---------|--------------|
| chr12:102 G | A           | G            | A           |              | 0.009    | -0.00051  | 0.62     | 0.631364 | 12       | 1.02E+08 | 0.007118 | 0.94      | 12       | 1.02E+08 | 0.005   | 0.071861     |
| chr2:2262 C | A           | C            | A           |              | -0.01512 | -0.00054  | NA       | 0.892891 | 2        | 2.26E+08 | 0.010956 | 0.96      | 2        | 2.26E+08 | 0.0184  | 0.411225     |
| chr6:3487 T | G           | T            | G           |              | -0.0173  | -0.01593  | NA       | 0.316763 | 6        | 34877672 | 0.007252 | 0.028     | 6        | 34877672 | 0.02006 | 0.38846      |
| rs2785980 T | C           | T            | C           |              | 0.02082  | -0.00587  | NA       | 0.762488 | 1        | 2.2E+08  | 0.00802  | 0.46      | 1        | 2.2E+08  | 0.01817 | 0.251859     |
| rs4691380 C | T           | C            | T           |              | -0.00337 | 0.002035  | NA       | 0.666427 | 4        | 1.57E+08 | 0.007202 | 0.78      | 4        | 1.57E+08 | 0.01919 | 0.860762     |
| rs4841132 A | G           | A            | G           |              | -0.05486 | -0.02347  | NA       | 0.021854 | 8        | 9326086  | 0.023476 | 0.32      | 8        | 9326086  | 0.0284  | 0.053398     |
| rs7607980 T | C           | T            | C           |              | -0.07136 | -0.02198  | NA       | 0.988713 | 2        | 1.65E+08 | 0.030708 | 0.47      | 2        | 1.65E+08 | 0.02542 | 0.004997     |
| rs780094 C  | T           | C            | T           |              | 0.035    | 0.00412   | 0.62     | 0.548031 | 2        | 27518370 | 0.00683  | 0.55      | 2        | 27518370 | 0.004   | 2.13E-18     |

Supplementary Table 2f. List of SNPs for Systolic BP (SBP) and their effects on TEWL

| SNP         | effect_alle | other_allele | effect_alle | other_allele | beta.SBP | beta.TEWL | eaf.SBP | eaf.TEWL | chr.TEWL | pos.TEWL | se.TEWL  | pval.TEWL | chr.SBP | pos.SBP  | se.SBP | pval.SBP |
|-------------|-------------|--------------|-------------|--------------|----------|-----------|---------|----------|----------|----------|----------|-----------|---------|----------|--------|----------|
| chr1:1073fA | G           | A            | G           |              | 0.4161   | -0.00697  | 0.3372  | 0.57781  | 1        | 10736490 | 0.006754 | 0.3       | 1       | 10736490 | 0.0345 | 1.83E-33 |
| chr1:1748fA | G           | A            | G           |              | -0.2039  | -0.01184  | 0.4781  | 0.463737 | 1        | 1748780  | 0.006869 | 0.085     | 1       | 1748780  | 0.0338 | 1.62E-09 |
| chr1:3798fT | C           | T            | C           |              | 0.196    | 0.015592  | 0.4106  | 0.301873 | 1        | 37983491 | 0.007602 | 0.04      | 1       | 37983491 | 0.0347 | 1.66E-08 |
| chr10:112fT | C           | T            | C           |              | 0.2209   | 0.008164  | 0.2906  | 0.052354 | 10       | 1.13E+08 | 0.014522 | 0.57      | 10      | 1.13E+08 | 0.0354 | 4.41E-10 |
| chr10:132fA | G           | A            | G           |              | 0.2524   | -0.01922  | 0.7935  | 0.854227 | 10       | 1.33E+08 | 0.009741 | 0.049     | 10      | 1.33E+08 | 0.0341 | 1.37E-13 |
| chr10:184fG | C           | G            | C           |              | 0.4531   | 0.002543  | 0.7071  | 0.029539 | 10       | 18439030 | 0.019178 | 0.89      | 10      | 18439030 | 0.0374 | 7.81E-34 |
| chr10:804fT | C           | T            | C           |              | 0.1723   | 0.006433  | 0.4086  | 0.104467 | 10       | 80436193 | 0.010598 | 0.54      | 10      | 80436193 | 0.0269 | 1.64E-10 |
| chr11:122fA | G           | A            | G           |              | -0.1811  | -0.00343  | 0.523   | 0.621278 | 11       | 1.23E+08 | 0.007024 | 0.63      | 11      | 1.23E+08 | 0.0267 | 1.21E-11 |
| chr11:473fT | C           | T            | C           |              | 0.3127   | -0.00896  | 0.5159  | 0.433718 | 11       | 47385041 | 0.006842 | 0.19      | 11      | 47385041 | 0.0327 | 1.23E-21 |
| chr11:585fA | G           | A            | G           |              | -0.2678  | -0.01704  | 0.2175  | 0.168108 | 11       | 58590875 | 0.009186 | 0.064     | 11      | 58590875 | 0.0405 | 3.86E-11 |
| chr12:124fA | G           | A            | G           |              | -0.1727  | 0.008818  | 0.3295  | 0.154419 | 12       | 12474476 | 0.009472 | 0.35      | 12      | 12474476 | 0.0285 | 1.40E-09 |
| chr12:501fA | G           | A            | G           |              | 0.2932   | -0.00397  | 0.3506  | 0.086696 | 12       | 50116154 | 0.012188 | 0.74      | 12      | 50116154 | 0.0347 | 3.17E-17 |
| chr12:576fA | G           | A            | G           |              | -0.3025  | -0.00183  | 0.8329  | 0.901777 | 12       | 57610139 | 0.011441 | 0.87      | 12      | 57610139 | 0.0417 | 4.26E-13 |
| chr12:795fA | G           | A            | G           |              | 0.2499   | 0.009755  | 0.185   | 0.270653 | 12       | 79510878 | 0.007795 | 0.21      | 12      | 79510878 | 0.0363 | 5.83E-12 |
| chr13:316fA | C           | A            | C           |              | 0.3258   | -0.0032   | 0.4693  | 0.098703 | 13       | 31607820 | 0.011505 | 0.78      | 13      | 31607820 | 0.0266 | 1.80E-34 |
| chr14:354fA | G           | A            | G           |              | 0.2118   | -0.00327  | 0.4023  | 0.463737 | 14       | 35402011 | 0.006907 | 0.64      | 14      | 35402011 | 0.0331 | 1.58E-10 |
| chr14:719fT | C           | T            | C           |              | -0.2055  | -0.00913  | 0.2515  | 0.207253 | 14       | 71999568 | 0.00832  | 0.27      | 14      | 71999568 | 0.0301 | 8.84E-12 |
| chr15:400fA | C           | A            | C           |              | 0.1926   | -0.00176  | 0.5181  | 0.324928 | 15       | 40029150 | 0.007355 | 0.81      | 15      | 40029150 | 0.0331 | 5.86E-09 |
| chr15:486fA | G           | A            | G           |              | -0.4312  | 0.041672  | 0.0949  | 0.013449 | 15       | 48610929 | 0.029463 | 0.16      | 15      | 48610929 | 0.0575 | 6.44E-14 |
| chr15:747fA | C           | A            | C           |              | -0.324   | -0.00276  | 0.6516  | 0.191883 | 15       | 74785026 | 0.008763 | 0.75      | 15      | 74785026 | 0.0378 | 1.08E-17 |
| chr16:247fT | C           | T            | C           |              | -0.3316  | -0.02046  | 0.1825  | 0.113112 | 16       | 24718909 | 0.01081  | 0.058     | 16      | 24718909 | 0.0446 | 1.04E-13 |
| chr17:183fT | C           | T            | C           |              | -0.2274  | -0.01024  | 0.5569  | 0.759126 | 17       | 18318485 | 0.007964 | 0.2       | 17      | 18318485 | 0.0263 | 5.41E-18 |
| chr17:592fC | T           | C            | T           |              | -0.1846  | 0.000933  | 0.5749  | 0.132565 | 17       | 59299316 | 0.009744 | 0.92      | 17      | 59299316 | 0.033  | 2.32E-08 |
| chr17:598fA | T           | A            | T           |              | -0.2774  | -0.00176  | 0.2771  | 0.384246 | 17       | 59880621 | 0.006921 | 0.8       | 17      | 59880621 | 0.045  | 7.01E-10 |
| chr17:634fT | A           | T            | A           |              | -0.2063  | 0.002736  | 0.629   | 0.334534 | 17       | 63476833 | 0.007275 | 0.71      | 17      | 63476833 | 0.0341 | 1.41E-09 |
| chr17:727fT | C           | T            | C           |              | 0.2407   | 0.001474  | 0.5357  | 0.403458 | 17       | 7276955  | 0.006971 | 0.83      | 17      | 7276955  | 0.0351 | 6.74E-12 |
| chr18:555fA | G           | A            | G           |              | -0.2834  | 0.009273  | 0.8602  | 0.982949 | 18       | 55585157 | 0.025338 | 0.71      | 18      | 55585157 | 0.0392 | 5.03E-13 |
| chr18:631fT | C           | T            | C           |              | 0.1747   | -0.01238  | 0.6364  | 0.568684 | 18       | 63178651 | 0.006954 | 0.075     | 18      | 63178651 | 0.0283 | 7.19E-10 |
| chr18:753fA | G           | A            | G           |              | -0.1774  | 0.003811  | 0.5266  | 0.689721 | 18       | 75328421 | 0.007282 | 0.6       | 18      | 75328421 | 0.0261 | 1.13E-11 |
| chr19:102fT | G           | T            | G           |              | 0.2156   | -0.00512  | 0.3977  | 0.610231 | 19       | 10223987 | 0.0071   | 0.47      | 19      | 10223987 | 0.035  | 7.06E-10 |
| chr19:114fT | G           | T            | G           |              | -0.4121  | -0.00282  | 0.4565  | 0.506484 | 19       | 11416089 | 0.006746 | 0.68      | 19      | 11416089 | 0.0329 | 4.32E-36 |
| chr2:1121fA | G           | A            | G           |              | 0.1832   | 0.017433  | 0.6388  | 0.85951  | 2        | 1.12E+08 | 0.009648 | 0.071     | 2       | 1.12E+08 | 0.0282 | 8.72E-11 |
| chr2:1576fA | T           | C            | G           |              | -0.2424  | 0.002856  | 0.1229  | 0.066523 | 2        | 1.58E+08 | 0.013772 | 0.84      | 2       | 1.58E+08 | 0.0403 | 1.85E-09 |
| chr2:1641fG | C           | G            | C           |              | -0.3584  | 0.009404  | 0.5067  | 0.56172  | 2        | 1.64E+08 | 0.006947 | 0.18      | 2       | 1.64E+08 | 0.0344 | 1.90E-25 |
| chr2:1821fA | T           | A            | T           |              | -0.2755  | -0.0067   | 0.2117  | 0.229827 | 2        | 1.82E+08 | 0.008062 | 0.41      | 2       | 1.82E+08 | 0.0328 | 4.85E-17 |
| chr2:2067fC | T           | C            | T           |              | -0.1924  | -0.00566  | 0.4803  | 0.251201 | 2        | 20679060 | 0.007943 | 0.48      | 2       | 20679060 | 0.0324 | 2.94E-09 |
| chr2:2178fA | G           | A            | G           |              | 0.2053   | -0.01295  | 0.3689  | 0.378242 | 2        | 2.18E+08 | 0.007011 | 0.065     | 2       | 2.18E+08 | 0.0338 | 1.21E-09 |
| chr2:2183fA | G           | A            | G           |              | -0.1532  | -0.00307  | 0.6249  | 0.649135 | 2        | 2.18E+08 | 0.007098 | 0.67      | 2       | 2.18E+08 | 0.0269 | 1.29E-08 |
| chr2:2262fA | G           | A            | G           |              | -0.2825  | -0.00068  | 0.3475  | 0.099424 | 2        | 2.26E+08 | 0.011282 | 0.95      | 2       | 2.26E+08 | 0.0338 | 5.93E-17 |
| chr2:2669fT | G           | T            | G           |              | -0.5149  | -0.00802  | 0.5692  | 0.280259 | 2        | 26692756 | 0.007348 | 0.27      | 2       | 26692756 | 0.0346 | 5.89E-50 |

|             |   |   |   |         |          |        |          |    |          |          |         |    |          |        |          |
|-------------|---|---|---|---------|----------|--------|----------|----|----------|----------|---------|----|----------|--------|----------|
| chr2:3697 C | A | C | A | -0.2062 | 0.019928 | 0.6686 | 0.033622 | 2  | 36975863 | 0.018171 | 0.27    | 2  | 36975863 | 0.0354 | 5.88E-09 |
| chr2:4565 T | G | T | G | 0.2769  | 0.000534 | 0.239  | 0.0622   | 2  | 45651621 | 0.014152 | 0.97    | 2  | 45651621 | 0.041  | 1.42E-11 |
| chr2:8620 A | G | A | G | -0.2359 | -0.01011 | 0.333  | 0.523775 | 2  | 86200698 | 0.006883 | 0.14    | 2  | 86200698 | 0.0362 | 6.80E-11 |
| chr21:420 A | G | A | G | 0.1588  | 0.004337 | 0.4342 | 0.09294  | 21 | 42052039 | 0.011369 | 0.7     | 21 | 42052039 | 0.0265 | 2.07E-09 |
| chr21:435 A | G | C | G | -0.2418 | -0.008   | 0.4052 | 0.225985 | 21 | 43578734 | 0.00804  | 0.32    | 21 | 43578734 | 0.0337 | 7.70E-13 |
| chr3:1604 T | C | T | C | -0.2361 | -0.01162 | 0.4838 | 0.235351 | 3  | 1.6E+08  | 0.008079 | 0.15    | 3  | 1.6E+08  | 0.0329 | 7.37E-13 |
| chr3:4198 A | C | A | C | -0.4206 | 0.013403 | 0.0955 | 0.988233 | 3  | 41983305 | 0.030909 | 0.66    | 3  | 41983305 | 0.0592 | 1.25E-12 |
| chr3:4560 C | G | C | G | -0.1731 | -0.00697 | 0.3978 | 0.086936 | 3  | 45602156 | 0.011883 | 0.56    | 3  | 45602156 | 0.0283 | 1.02E-09 |
| chr3:4754 T | C | T | C | -0.2714 | -0.00639 | 0.2456 | 0.134726 | 3  | 47547159 | 0.009673 | 0.51    | 3  | 47547159 | 0.04   | 1.16E-11 |
| chr3:4805 T | C | T | C | -0.3319 | -0.00414 | 0.256  | 0.147214 | 3  | 48050845 | 0.009508 | 0.66    | 3  | 48050845 | 0.0406 | 2.87E-16 |
| chr4:1059 C | T | C | T | 0.3159  | -0.00481 | 0.7315 | 0.337176 | 4  | 1.06E+08 | 0.007316 | 0.51    | 4  | 1.06E+08 | 0.0368 | 9.33E-18 |
| chr4:1431 G | T | G | T | 0.2669  | -0.00112 | 0.5372 | 0.744957 | 4  | 1.43E+08 | 0.007401 | 0.88    | 4  | 1.43E+08 | 0.0345 | 1.07E-14 |
| chr4:1687 A | C | A | C | 0.2082  | -0.00618 | 0.3911 | 0.169068 | 4  | 1.69E+08 | 0.00908  | 0.5     | 4  | 1.69E+08 | 0.034  | 9.22E-10 |
| chr4:2696 T | C | T | C | -0.2065 | -0.00131 | 0.4115 | 0.374159 | 4  | 2696637  | 0.007011 | 0.85    | 4  | 2696637  | 0.0268 | 1.35E-14 |
| chr5:1087 C | A | C | A | 0.2124  | 0.002455 | 0.7287 | 0.089097 | 5  | 1.09E+08 | 0.011682 | 0.83    | 5  | 1.09E+08 | 0.0372 | 1.11E-08 |
| chr5:1280 A | T | A | T | -0.277  | 0.005563 | 0.8125 | 0.783141 | 5  | 1.28E+08 | 0.008131 | 0.49    | 5  | 1.28E+08 | 0.0388 | 9.42E-13 |
| chr5:3283 T | C | T | C | -0.43   | -0.0267  | 0.4087 | 0.338377 | 5  | 32831833 | 0.007337 | 0.00027 | 5  | 32831833 | 0.0331 | 1.09E-38 |
| chr6:1267 C | T | C | T | -0.3614 | -0.00099 | 0.583  | 0.435639 | 6  | 1.27E+08 | 0.006761 | 0.88    | 6  | 1.27E+08 | 0.0351 | 7.76E-25 |
| chr6:2068 A | C | A | C | 0.2018  | -0.00227 | 0.2637 | 0.338377 | 6  | 20686765 | 0.007258 | 0.75    | 6  | 20686765 | 0.0295 | 7.40E-12 |
| chr6:2610 T | G | T | G | 0.3513  | -0.02704 | 0.1418 | 0.03194  | 6  | 26104404 | 0.019833 | 0.17    | 6  | 26104404 | 0.0483 | 3.33E-13 |
| chr6:2717 T | C | T | C | 0.2089  | -0.00784 | 0.1681 | 0.009846 | 6  | 27171269 | 0.034906 | 0.82    | 6  | 27171269 | 0.0351 | 2.69E-09 |
| chr6:3213 T | C | T | C | -0.2611 | 0.002562 | 0.3668 | 0.480788 | 6  | 32139362 | 0.006866 | 0.71    | 6  | 32139362 | 0.0335 | 6.19E-15 |
| chr6:3419 T | C | C | A | -0.3749 | -0.01174 | 0.9498 | 0.009126 | 6  | 34197574 | 0.036234 | 0.75    | 6  | 34197574 | 0.0654 | 1.01E-08 |
| chr6:4338 A | G | A | G | 0.3526  | 0.013186 | 0.3991 | 0.341499 | 6  | 43381477 | 0.007312 | 0.071   | 6  | 43381477 | 0.0347 | 2.63E-24 |
| chr7:1315 C | G | C | G | 0.239   | -0.00812 | 0.3679 | 0.460134 | 7  | 1.32E+08 | 0.006715 | 0.23    | 7  | 1.32E+08 | 0.0358 | 2.51E-11 |
| chr7:2720 C | T | C | T | 0.6519  | -0.00552 | 0.8778 | 0.347983 | 7  | 27206377 | 0.007036 | 0.43    | 7  | 27206377 | 0.0546 | 6.67E-33 |
| chr7:4597 G | C | G | C | 0.3505  | 0.003803 | 0.5691 | 0.73487  | 7  | 45970501 | 0.007642 | 0.62    | 7  | 45970501 | 0.033  | 2.48E-26 |
| chr8:1236 T | C | T | C | -0.1918 | -0.00138 | 0.7845 | 0.817483 | 8  | 1.24E+08 | 0.009006 | 0.88    | 8  | 1.24E+08 | 0.0322 | 2.46E-09 |
| chr8:5077 T | C | T | C | 0.2518  | 0.001514 | 0.2063 | 0.248079 | 8  | 50778263 | 0.007886 | 0.85    | 8  | 50778263 | 0.0403 | 3.95E-10 |
| chr8:7567 A | C | A | C | 0.2185  | 0.016664 | 0.5109 | 0.409462 | 8  | 75679645 | 0.006946 | 0.016   | 8  | 75679645 | 0.033  | 3.54E-11 |
| chr9:1139 T | G | T | G | 0.1708  | 0.010186 | 0.4946 | 0.620317 | 9  | 1.14E+08 | 0.007062 | 0.15    | 9  | 1.14E+08 | 0.0269 | 2.09E-10 |
| chr9:2061 T | C | T | C | -0.1843 | -0.00825 | 0.3134 | 0.398175 | 9  | 20612517 | 0.006936 | 0.23    | 9  | 20612517 | 0.0291 | 2.36E-10 |
| chr9:9241 A | G | A | G | 0.1884  | -0.00905 | 0.6056 | 0.855427 | 9  | 92419346 | 0.009598 | 0.35    | 9  | 92419346 | 0.0275 | 7.78E-12 |
| rs1006204 T | C | T | C | 0.2352  | 0.000284 | 0.1473 | 0.170029 | 5  | 62258054 | 0.009212 | 0.98    | 5  | 62258054 | 0.0379 | 5.61E-10 |
| rs1014987 T | C | T | C | 0.2127  | 0.001989 | 0.3973 | 0.371758 | 14 | 99645618 | 0.00719  | 0.78    | 14 | 99645618 | 0.0342 | 4.93E-10 |
| rs1018230 A | G | A | G | -0.1644 | -0.01886 | 0.4315 | 0.411143 | 2  | 2.27E+08 | 0.006844 | 0.0059  | 2  | 2.27E+08 | 0.0264 | 4.58E-10 |
| rs1018400 T | C | T | C | -0.2046 | -0.00091 | 0.4314 | 0.115274 | 2  | 1.65E+08 | 0.010655 | 0.93    | 2  | 1.65E+08 | 0.0273 | 7.17E-14 |
| rs1021606 A | G | A | G | -0.2386 | -0.00861 | 0.8274 | 0.571085 | 7  | 30875648 | 0.006831 | 0.21    | 7  | 30875648 | 0.0382 | 4.40E-10 |
| rs1025410 T | C | T | C | 0.3459  | -0.00188 | 0.2726 | 0.044188 | 7  | 1.52E+08 | 0.016421 | 0.91    | 7  | 1.52E+08 | 0.0374 | 2.11E-20 |
| rs1025686 G | A | G | A | 0.214   | 0.014472 | 0.7546 | 0.444524 | 18 | 50620757 | 0.006904 | 0.036   | 18 | 50620757 | 0.0389 | 3.78E-08 |
| rs1034906 C | G | C | G | -0.2067 | 0.002778 | 0.1482 | 0.067483 | 16 | 4078852  | 0.013713 | 0.84    | 16 | 4078852  | 0.0373 | 2.89E-08 |
| rs1036190 G | A | G | A | 0.2165  | 0.002897 | 0.6023 | 0.271374 | 5  | 1.49E+08 | 0.007593 | 0.7     | 5  | 1.49E+08 | 0.034  | 1.89E-10 |

|             |   |   |   |         |          |        |          |    |          |          |       |    |          |        |          |
|-------------|---|---|---|---------|----------|--------|----------|----|----------|----------|-------|----|----------|--------|----------|
| rs1036821 A | G | A | G | 0.2143  | 0.007503 | 0.2954 | 0.522815 | 8  | 1.35E+08 | 0.006947 | 0.28  | 8  | 1.35E+08 | 0.0363 | 3.71E-09 |
| rs1042392 A | T | A | T | 0.1975  | 0.002042 | 0.1983 | 0.191883 | 19 | 45679046 | 0.008424 | 0.81  | 19 | 45679046 | 0.0328 | 1.81E-09 |
| rs1047717 A | G | A | G | 0.1845  | 0.015256 | 0.7439 | 0.933237 | 5  | 1.42E+08 | 0.013261 | 0.25  | 5  | 1.42E+08 | 0.03   | 7.45E-10 |
| rs1073425 A | G | A | G | -0.3026 | 0.004378 | 0.6206 | 0.637128 | 11 | 17383292 | 0.007067 | 0.54  | 11 | 17383292 | 0.0359 | 3.82E-17 |
| rs1077462 G | A | G | A | -0.481  | -0.0255  | 0.6576 | 0.011047 | 12 | 1.11E+08 | 0.031029 | 0.41  | 12 | 1.11E+08 | 0.0537 | 3.14E-19 |
| rs1078856 C | T | C | T | -0.2282 | -0.00205 | 0.7503 | 0.345821 | 10 | 87844975 | 0.007144 | 0.77  | 10 | 87844975 | 0.0398 | 1.00E-08 |
| rs1083027 T | A | T | A | 0.259   | 0.005854 | 0.759  | 0.413545 | 11 | 89483257 | 0.007003 | 0.4   | 11 | 89483257 | 0.0425 | 1.10E-09 |
| rs1084959 T | C | T | C | -0.1891 | 0.000188 | 0.8132 | 0.887608 | 12 | 934668   | 0.010921 | 0.99  | 12 | 934668   | 0.0346 | 4.53E-08 |
| rs1085285 T | C | T | C | 0.2287  | 0.000805 | 0.4153 | 0.275937 | 17 | 1454457  | 0.007574 | 0.92  | 17 | 1454457  | 0.0333 | 6.76E-12 |
| rs1085714 T | A | T | A | -0.6298 | -0.0028  | 0.7239 | 0.398655 | 4  | 80259918 | 0.007081 | 0.69  | 4  | 80259918 | 0.0372 | 3.05E-64 |
| rs1092824 G | C | G | C | 0.216   | -0.00226 | 0.6014 | 0.716378 | 2  | 1.45E+08 | 0.007722 | 0.77  | 2  | 1.45E+08 | 0.0333 | 8.50E-11 |
| rs1100075 T | G | T | G | -0.3584 | 0.011696 | 0.8665 | 0.813641 | 10 | 73710597 | 0.00865  | 0.18  | 10 | 73710597 | 0.0494 | 4.21E-13 |
| rs1104059 T | G | T | G | -0.2779 | 0.003468 | 0.1304 | 0.215418 | 11 | 49857205 | 0.008285 | 0.68  | 11 | 49857205 | 0.041  | 1.24E-11 |
| rs1106468 G | A | G | A | 0.3775  | -0.01468 | 0.9175 | 0.119837 | 12 | 1.1E+08  | 0.010421 | 0.16  | 12 | 1.1E+08  | 0.0684 | 3.40E-08 |
| rs1106632 A | G | A | G | 0.2464  | -0.02939 | 0.4165 | 0.014409 | 12 | 1.12E+08 | 0.028512 | 0.3   | 12 | 1.12E+08 | 0.0362 | 1.00E-11 |
| rs1110535 G | A | G | A | 0.6003  | -0.00055 | 0.8382 | 0.29635  | 12 | 89632746 | 0.007286 | 0.94  | 12 | 89632746 | 0.0443 | 7.71E-42 |
| rs1115301 A | G | A | G | 0.304   | 0.010801 | 0.1799 | 0.040346 | 6  | 96508261 | 0.016854 | 0.52  | 6  | 96508261 | 0.0449 | 1.25E-11 |
| rs1115433 A | C | A | C | -0.2205 | -0.00441 | 0.6055 | 0.472863 | 6  | 1.26E+08 | 0.006886 | 0.52  | 6  | 1.26E+08 | 0.0276 | 1.22E-15 |
| rs1115909 A | G | A | G | -0.1777 | -0.00534 | 0.5221 | 0.808357 | 14 | 74631610 | 0.008447 | 0.53  | 14 | 74631610 | 0.0266 | 2.49E-11 |
| rs1116851 T | C | T | C | 0.2472  | -0.00417 | 0.2193 | 0.28194  | 12 | 48308282 | 0.007707 | 0.59  | 12 | 48308282 | 0.0396 | 4.47E-10 |
| rs1117913 T | C | T | C | 0.2053  | -0.01527 | 0.1487 | 0.036744 | 9  | 19111189 | 0.017874 | 0.39  | 9  | 19111189 | 0.0375 | 4.45E-08 |
| rs1122208 T | A | T | A | -0.2986 | -0.00679 | 0.6594 | 0.030259 | 11 | 1.3E+08  | 0.019083 | 0.72  | 11 | 1.3E+08  | 0.0358 | 7.09E-17 |
| rs1122925 T | C | T | C | -0.3524 | 0.003693 | 0.0986 | 0.122719 | 11 | 55362164 | 0.010283 | 0.72  | 11 | 55362164 | 0.0609 | 7.12E-09 |
| rs1124886 A | G | A | G | -0.1726 | 0.004975 | 0.5811 | 0.884006 | 16 | 1315340  | 0.01044  | 0.63  | 16 | 1315340  | 0.0277 | 4.90E-10 |
| rs1125683 A | G | A | G | 0.2107  | -0.02076 | 0.1956 | 0.013449 | 10 | 10798572 | 0.029476 | 0.48  | 10 | 10798572 | 0.0351 | 2.01E-09 |
| rs1126344 A | G | A | G | -0.4016 | -0.01133 | 0.1161 | 0.496878 | 11 | 69437232 | 0.006786 | 0.095 | 11 | 69437232 | 0.0583 | 5.77E-12 |
| rs1133970 A | G | A | G | -0.5177 | -0.00378 | 0.0827 | 0.111671 | 6  | 1.51E+08 | 0.010687 | 0.72  | 6  | 1.51E+08 | 0.0637 | 4.56E-16 |
| rs1137442 T | G | T | G | -0.2173 | 0.006372 | 0.4792 | 0.099904 | 12 | 65979721 | 0.011408 | 0.58  | 12 | 65979721 | 0.0333 | 7.04E-11 |
| rs1152620 C | A | A | T | 0.5265  | 0.012153 | 0.9166 | 0.010327 | 2  | 42969554 | 0.034159 | 0.72  | 2  | 42969554 | 0.0638 | 1.54E-16 |
| rs1159201 A | G | A | G | 0.2092  | 0.008226 | 0.7406 | 0.825648 | 5  | 67015511 | 0.009015 | 0.36  | 5  | 67015511 | 0.03   | 2.90E-12 |
| rs1159216 C | G | C | G | 0.2318  | 0.00165  | 0.1955 | 0.163305 | 10 | 1.17E+08 | 0.009314 | 0.86  | 10 | 1.17E+08 | 0.0363 | 1.72E-10 |
| rs1161744 A | G | A | G | 0.3324  | -0.00028 | 0.2889 | 0.10999  | 13 | 1.14E+08 | 0.010859 | 0.98  | 13 | 1.14E+08 | 0.0374 | 5.82E-19 |
| rs1162256 T | C | T | C | -0.1756 | -0.00694 | 0.3202 | 0.454371 | 14 | 77050805 | 0.006804 | 0.31  | 14 | 77050805 | 0.0283 | 5.80E-10 |
| rs1163625 T | C | T | C | 0.1914  | 0.000223 | 0.4702 | 0.487272 | 15 | 75946679 | 0.006735 | 0.97  | 15 | 75946679 | 0.0272 | 1.96E-12 |
| rs1168868 C | G | C | G | -0.2222 | -0.0056  | 0.2384 | 0.07757  | 2  | 1.21E+08 | 0.012819 | 0.66  | 2  | 1.21E+08 | 0.0368 | 1.55E-09 |
| rs1178504 T | C | T | C | 0.2385  | -0.01101 | 0.2229 | 0.301873 | 8  | 38348724 | 0.00745  | 0.14  | 8  | 38348724 | 0.0314 | 2.93E-14 |
| rs1187634 A | G | A | G | -0.2453 | 0.002483 | 0.7007 | 0.773535 | 18 | 51273621 | 0.008148 | 0.76  | 18 | 51273621 | 0.03   | 3.21E-16 |
| rs1203421 T | G | T | G | -0.2434 | 0.00145  | 0.4093 | 0.284342 | 1  | 41909802 | 0.007594 | 0.85  | 1  | 41909802 | 0.0359 | 1.16E-11 |
| rs1203575 C | T | C | T | -0.2125 | 0.00205  | 0.6445 | 0.310279 | 1  | 88866416 | 0.007371 | 0.78  | 1  | 88866416 | 0.0359 | 3.38E-09 |
| rs1208844 A | C | A | C | -0.1631 | -0.00491 | 0.6235 | 0.619837 | 1  | 2.18E+08 | 0.00703  | 0.49  | 1  | 2.18E+08 | 0.028  | 5.87E-09 |
| rs1211663 A | G | A | G | 0.1811  | -0.02695 | 0.2801 | 0.021614 | 1  | 42600923 | 0.022828 | 0.24  | 1  | 42600923 | 0.0302 | 1.94E-09 |
| rs1212578 G | C | G | C | -0.229  | -0.0004  | 0.6523 | 0.181316 | 1  | 56151040 | 0.008966 | 0.96  | 1  | 56151040 | 0.0366 | 3.82E-10 |

|               |   |   |   |         |           |        |          |    |          |          |       |    |          |        |          |
|---------------|---|---|---|---------|-----------|--------|----------|----|----------|----------|-------|----|----------|--------|----------|
| rs1219424 T   | C | T | C | -0.3776 | -0.01599  | 0.1797 | 0.013929 | 6  | 1.34E+08 | 0.028483 | 0.57  | 6  | 1.34E+08 | 0.0607 | 4.83E-10 |
| rs12321 C     | G | C | G | -0.1946 | 0.004548  | 0.4127 | 0.473823 | 22 | 29057205 | 0.006973 | 0.51  | 22 | 29057205 | 0.0334 | 5.62E-09 |
| rs1244917 T   | C | T | C | 0.3022  | -0.00082  | 0.557  | 0.508646 | 16 | 75429114 | 0.006819 | 0.9   | 16 | 75429114 | 0.0334 | 1.35E-19 |
| rs1250259 T   | A | T | A | -0.4518 | -0.0071   | 0.7447 | 0.118636 | 2  | 2.15E+08 | 0.010064 | 0.48  | 2  | 2.15E+08 | 0.0745 | 1.33E-09 |
| rs1250618 T   | A | T | A | -0.381  | 0.011699  | 0.8789 | 0.154419 | 4  | 85818748 | 0.00947  | 0.22  | 4  | 85818748 | 0.0524 | 3.63E-13 |
| rs1263557 A   | C | A | C | 0.282   | 0.007964  | 0.249  | 0.414745 | 3  | 14913042 | 0.006937 | 0.25  | 3  | 14913042 | 0.0389 | 3.99E-13 |
| rs1263886 G   | A | G | A | 0.258   | -0.00337  | 0.7348 | 0.521854 | 3  | 1.7E+08  | 0.00683  | 0.62  | 3  | 1.7E+08  | 0.0373 | 4.80E-12 |
| rs1264966 A   | T | A | T | -0.2194 | 0.000555  | 0.2258 | 0.504563 | 4  | 82975665 | 0.006867 | 0.94  | 4  | 82975665 | 0.0332 | 3.93E-11 |
| rs1270539 A   | G | A | G | 0.7392  | -0.00102  | 0.1907 | 0.148895 | 7  | 1.07E+08 | 0.009498 | 0.91  | 7  | 1.07E+08 | 0.0421 | 5.50E-69 |
| rs1279912 T   | G | T | G | 0.3084  | 0.006374  | 0.2006 | 0.231748 | 11 | 16286917 | 0.007934 | 0.42  | 11 | 16286917 | 0.0419 | 1.75E-13 |
| rs1290696 C   | T | C | T | -0.2324 | -0.00365  | 0.6175 | 0.261768 | 15 | 94768842 | 0.007723 | 0.64  | 15 | 94768842 | 0.0354 | 5.45E-11 |
| rs1290964 A   | G | A | G | 0.1911  | 0.008381  | 0.4629 | 0.050432 | 15 | 85681339 | 0.015189 | 0.58  | 15 | 85681339 | 0.0264 | 5.01E-13 |
| rs1291687 A   | C | A | C | 0.1922  | 0.017733  | 0.5868 | 0.979107 | 15 | 74260401 | 0.023676 | 0.45  | 15 | 74260401 | 0.0289 | 3.12E-11 |
| rs1293798 A   | G | A | G | -0.2313 | 0.002541  | 0.3849 | 0.29731  | 17 | 6576133  | 0.007454 | 0.73  | 17 | 6576133  | 0.0355 | 6.91E-11 |
| rs1295205 T   | C | T | C | -0.244  | 0.001312  | 0.4188 | 0.254803 | 17 | 2079496  | 0.007677 | 0.86  | 17 | 2079496  | 0.0351 | 3.73E-12 |
| rs1295564 C   | G | C | G | 0.2931  | 0.00047   | 0.8239 | 0.688761 | 18 | 771046   | 0.007455 | 0.95  | 18 | 771046   | 0.0362 | 5.75E-16 |
| rs1314152 A   | G | A | G | -0.1948 | -0.00602  | 0.4113 | 0.260086 | 4  | 48787252 | 0.007891 | 0.45  | 4  | 48787252 | 0.0357 | 4.70E-08 |
| rs1323440 A   | G | A | G | -0.1928 | 0.012979  | 0.4645 | 0.342939 | 7  | 1.31E+08 | 0.007233 | 0.073 | 7  | 1.31E+08 | 0.0326 | 3.27E-09 |
| rs1328223 A   | G | A | G | 0.1764  | -0.00118  | 0.527  | 0.483429 | 8  | 1.42E+08 | 0.006816 | 0.86  | 8  | 1.42E+08 | 0.0272 | 9.43E-11 |
| rs1343114 A   | C | A | C | 0.2055  | -0.0083   | 0.3773 | 0.743756 | 2  | 55966530 | 0.007631 | 0.28  | 2  | 55966530 | 0.0339 | 1.35E-09 |
| rs1407256 G   | A | G | A | -0.2925 | 0.006717  | 0.8337 | 0.539866 | 20 | 32625845 | 0.006811 | 0.32  | 20 | 32625845 | 0.0503 | 5.96E-09 |
| rs1415293 A   | T | A | T | 0.1745  | -0.00193  | 0.6994 | 0.771614 | 1  | 2.2E+08  | 0.008132 | 0.81  | 1  | 2.2E+08  | 0.0288 | 1.43E-09 |
| rs1440371 A   | G | A | G | 0.217   | 0.00407   | 0.2827 | 0.189241 | 15 | 66648746 | 0.008502 | 0.63  | 15 | 66648746 | 0.0363 | 2.30E-09 |
| rs1449386 T   | G | T | G | -0.2088 | 0.008237  | 0.3968 | 0.102546 | 3  | 85569929 | 0.010706 | 0.44  | 3  | 85569929 | 0.0276 | 4.29E-14 |
| rs1490938 TTG | T | A | G | -0.2276 | 0.008046  | 0.5535 | 0.350624 | 11 | 1.07E+08 | 0.007322 | 0.27  | 11 | 1.07E+08 | 0.0332 | 7.50E-12 |
| rs159960 G    | A | G | A | -0.2382 | -8.84E-05 | 0.4883 | 0.782421 | 1  | 8416368  | 0.008126 | 0.99  | 1  | 8416368  | 0.0342 | 3.49E-12 |
| rs1692792 C   | T | C | T | -0.2817 | 0.008094  | 0.8471 | 0.278338 | 9  | 1.25E+08 | 0.00766  | 0.29  | 9  | 1.25E+08 | 0.0457 | 7.18E-10 |
| rs1709658 C   | T | C | G | -0.2831 | -0.0094   | 0.7962 | 0.227906 | 14 | 98168761 | 0.00808  | 0.24  | 14 | 98168761 | 0.0409 | 4.32E-12 |
| rs1711464 G   | T | G | T | 0.4605  | -0.0038   | 0.8951 | 0.381844 | 10 | 1.03E+08 | 0.007005 | 0.59  | 10 | 1.03E+08 | 0.0571 | 7.64E-16 |
| rs1760876 C   | T | C | T | -0.4971 | -0.02922  | 0.8708 | 0.009126 | 17 | 46935905 | 0.034426 | 0.4   | 17 | 46935905 | 0.0507 | 1.09E-22 |
| rs1767925 A   | G | A | G | 0.3393  | -0.00182  | 0.869  | 0.945725 | 14 | 1.03E+08 | 0.015089 | 0.9   | 14 | 1.03E+08 | 0.0398 | 1.59E-17 |
| rs1780435 T   | C | T | C | 0.1773  | 0.00364   | 0.5441 | 0.341979 | 8  | 1.28E+08 | 0.007261 | 0.62  | 8  | 1.28E+08 | 0.0267 | 2.99E-11 |
| rs1801253 G   | C | G | C | 0.2724  | 0.008853  | 0.7099 | 0.262488 | 10 | 1.14E+08 | 0.007837 | 0.26  | 10 | 1.14E+08 | 0.0376 | 4.19E-13 |
| rs1815614 A   | G | A | G | 0.2405  | -0.0113   | 0.5401 | 0.552113 | 1  | 9381779  | 0.006913 | 0.1   | 1  | 9381779  | 0.0342 | 2.14E-12 |
| rs1840221 T   | C | T | C | 0.216   | -0.01726  | 0.2593 | 0.128722 | 19 | 4932267  | 0.010148 | 0.089 | 19 | 4932267  | 0.0304 | 1.14E-12 |
| rs1860509 G   | T | G | T | 0.268   | -0.00548  | 0.7757 | 0.221902 | 7  | 1.4E+08  | 0.008264 | 0.51  | 7  | 1.4E+08  | 0.0442 | 1.31E-09 |
| rs1887320 A   | G | A | G | 0.3107  | 0.005138  | 0.4655 | 0.541787 | 20 | 10985350 | 0.006879 | 0.46  | 20 | 10985350 | 0.0323 | 6.00E-22 |
| rs1995624 T   | C | T | C | -0.3412 | 0.004399  | 0.1252 | 0.354707 | 10 | 94827994 | 0.007029 | 0.53  | 10 | 94827994 | 0.057  | 2.20E-09 |
| rs2001337 A   | G | A | G | 0.3192  | -0.00092  | 0.3599 | 0.239433 | 8  | 10393644 | 0.008129 | 0.91  | 8  | 10393644 | 0.028  | 5.13E-30 |
| rs2012071 A   | G | A | G | -0.1575 | -0.00467  | 0.4827 | 0.850144 | 6  | 1.12E+08 | 0.009446 | 0.62  | 6  | 1.12E+08 | 0.0267 | 3.60E-09 |
| rs2048240 C   | T | C | T | 0.2328  | -0.00194  | 0.5273 | 0.396013 | 2  | 28417460 | 0.007059 | 0.78  | 2  | 28417460 | 0.033  | 1.83E-12 |
| rs2071382 T   | C | T | C | 0.4092  | 0.002914  | 0.4353 | 0.180836 | 15 | 90884967 | 0.008652 | 0.74  | 15 | 90884967 | 0.0345 | 1.55E-32 |

|           |    |   |   |         |          |        |          |    |          |          |       |    |          |        |          |
|-----------|----|---|---|---------|----------|--------|----------|----|----------|----------|-------|----|----------|--------|----------|
| rs2075066 | A  | G | G | 0.2507  | -0.01047 | 0.1851 | 0.185879 | 7  | 44225580 | 0.008712 | 0.23  | 7  | 44225580 | 0.0458 | 4.40E-08 |
| rs2084600 | G  | A | A | -0.2336 | -0.01778 | 0.5568 | 0.086696 | 11 | 10330748 | 0.01151  | 0.12  | 11 | 10330748 | 0.0332 | 1.97E-12 |
| rs2107595 | A  | G | G | 0.4172  | 0.00132  | 0.1847 | 0.332373 | 7  | 19009765 | 0.007365 | 0.86  | 7  | 19009765 | 0.0441 | 3.25E-21 |
| rs2139629 | A  | G | G | 0.2007  | 0.001671 | 0.7722 | 0.669068 | 2  | 50400459 | 0.007158 | 0.82  | 2  | 50400459 | 0.0324 | 5.89E-10 |
| rs2179490 | A  | G | G | -0.2307 | 0.023121 | 0.3692 | 0.068684 | 1  | 1.69E+08 | 0.013652 | 0.09  | 1  | 1.69E+08 | 0.0342 | 1.56E-11 |
| rs2192768 | C  | T | T | -0.2313 | -0.00342 | 0.4407 | 0.339097 | 2  | 40298792 | 0.00719  | 0.63  | 2  | 40298792 | 0.0347 | 2.58E-11 |
| rs2286525 | G  | A | A | 0.353   | -0.00893 | 0.732  | 0.399616 | 17 | 61394762 | 0.006965 | 0.2   | 17 | 61394762 | 0.0395 | 3.65E-19 |
| rs2290273 | T  | C | C | -0.1511 | -0.00324 | 0.4886 | 0.588136 | 15 | 85000819 | 0.006893 | 0.64  | 15 | 85000819 | 0.0272 | 2.93E-08 |
| rs2300481 | T  | C | C | 0.1857  | 0.013121 | 0.3787 | 0.161864 | 2  | 66555335 | 0.009186 | 0.15  | 2  | 66555335 | 0.027  | 6.03E-12 |
| rs2306363 | T  | G | G | -0.3618 | 0.012567 | 0.1937 | 0.252882 | 11 | 65638129 | 0.007743 | 0.1   | 11 | 65638129 | 0.0432 | 5.08E-17 |
| rs2476970 | A  | G | G | -0.3872 | 0.034049 | 0.1016 | 0.007925 | 10 | 1.01E+08 | 0.037706 | 0.37  | 10 | 1.01E+08 | 0.0551 | 2.03E-12 |
| rs2487903 | T  | C | C | -0.1692 | -0.00148 | 0.401  | 0.319404 | 1  | 2.1E+08  | 0.007483 | 0.84  | 1  | 2.1E+08  | 0.0272 | 4.82E-10 |
| rs256904  | A  | T | T | -0.206  | 0.01098  | 0.2766 | 0.501921 | 5  | 56514478 | 0.006812 | 0.11  | 5  | 56514478 | 0.0295 | 3.02E-12 |
| rs2581468 | T  | C | C | 0.2435  | -0.00862 | 0.8093 | 0.721662 | 15 | 99572263 | 0.007677 | 0.26  | 15 | 99572263 | 0.0356 | 7.84E-12 |
| rs2643826 | C  | T | T | 0.4106  | -0.00431 | 0.4571 | 0.710615 | 3  | 27521497 | 0.007423 | 0.56  | 3  | 27521497 | 0.0366 | 2.87E-29 |
| rs267539  | A  | G | G | -0.1784 | -0.00205 | 0.4635 | 0.697406 | 3  | 37540761 | 0.007187 | 0.78  | 3  | 37540761 | 0.0264 | 1.40E-11 |
| rs2707450 | T  | C | C | 0.2125  | 0.005593 | 0.7357 | 0.595341 | 4  | 17940937 | 0.006892 | 0.42  | 4  | 17940937 | 0.0303 | 2.29E-12 |
| rs2823139 | A  | G | G | 0.25    | 0.002725 | 0.3392 | 0.229107 | 21 | 15204463 | 0.008109 | 0.74  | 21 | 15204463 | 0.0367 | 9.25E-12 |
| rs3407044 | A  | G | G | -0.1971 | 0.00723  | 0.566  | 0.518972 | 5  | 1.48E+08 | 0.00681  | 0.29  | 5  | 1.48E+08 | 0.0263 | 6.44E-14 |
| rs3429493 | A  | T | T | 0.2079  | 0.004158 | 0.2063 | 0.097262 | 16 | 49850016 | 0.011625 | 0.72  | 16 | 49850016 | 0.0334 | 4.94E-10 |
| rs3455689 | T  | G | G | 0.2115  | -0.00729 | 0.3107 | 0.009846 | 17 | 58749592 | 0.034918 | 0.83  | 17 | 58749592 | 0.0292 | 4.31E-13 |
| rs3479779 | A  | G | G | -0.2473 | -0.00601 | 0.4267 | 0.269452 | 5  | 78557262 | 0.00777  | 0.44  | 5  | 78557262 | 0.0333 | 1.07E-13 |
| rs3486854 | T  | C | C | -0.2044 | -0.00944 | 0.5701 | 0.25     | 10 | 74226399 | 0.007654 | 0.22  | 10 | 74226399 | 0.028  | 3.06E-13 |
| rs35444   | G  | A | A | 0.3671  | -0.00973 | 0.6147 | 0.291787 | 12 | 1.15E+08 | 0.007503 | 0.19  | 12 | 1.15E+08 | 0.033  | 8.94E-29 |
| rs356833  | A  | G | G | 0.1719  | 0.006183 | 0.7496 | 0.776417 | 18 | 28743561 | 0.008135 | 0.45  | 18 | 28743561 | 0.0303 | 1.38E-08 |
| rs357489  | A  | T | T | -0.2101 | -0.00595 | 0.7092 | 0.658501 | 3  | 1.54E+08 | 0.007104 | 0.4   | 3  | 1.54E+08 | 0.0295 | 9.83E-13 |
| rs3734345 | TA | T | A | -0.3067 | 0.003218 | 0.8811 | 0.060038 | 6  | 1.18E+08 | 0.014319 | 0.82  | 6  | 1.18E+08 | 0.0513 | 2.34E-09 |
| rs3740781 | T  | C | C | 0.2255  | 0.00827  | 0.6604 | 0.307157 | 11 | 45234375 | 0.007299 | 0.26  | 11 | 45234375 | 0.0363 | 5.20E-10 |
| rs3744010 | A  | G | G | -0.2759 | -0.00338 | 0.292  | 0.115754 | 17 | 75844162 | 0.010689 | 0.75  | 17 | 75844162 | 0.0371 | 1.05E-13 |
| rs3745348 | T  | C | C | 0.2599  | -0.0143  | 0.3421 | 0.378482 | 19 | 17101600 | 0.007103 | 0.044 | 19 | 17101600 | 0.0343 | 3.74E-14 |
| rs3772840 | T  | C | C | -0.1846 | 0.001334 | 0.4362 | 0.664505 | 3  | 1.25E+08 | 0.007159 | 0.85  | 3  | 1.25E+08 | 0.0334 | 3.41E-08 |
| rs3790604 | A  | C | C | 0.6346  | -0.00294 | 0.0813 | 0.292747 | 1  | 1.13E+08 | 0.007498 | 0.69  | 1  | 1.13E+08 | 0.0636 | 2.05E-23 |
| rs3796592 | C  | T | T | 0.2949  | -0.01179 | 0.7958 | 0.208934 | 4  | 1.56E+08 | 0.008456 | 0.16  | 4  | 1.56E+08 | 0.042  | 2.24E-12 |
| rs3802228 | A  | G | G | 0.2144  | 0.003392 | 0.4325 | 0.653458 | 8  | 1.43E+08 | 0.006989 | 0.63  | 8  | 1.43E+08 | 0.0334 | 1.36E-10 |
| rs3821843 | G  | A | A | 0.3337  | -0.01033 | 0.6923 | 0.536263 | 3  | 53523985 | 0.006701 | 0.12  | 3  | 53523985 | 0.0377 | 9.09E-19 |
| rs3821964 | T  | C | C | -0.1676 | -0.0016  | 0.6057 | 0.488953 | 4  | 95119553 | 0.006913 | 0.82  | 4  | 95119553 | 0.0271 | 6.22E-10 |
| rs4109837 | A  | T | T | -0.2287 | 0.004095 | 0.302  | 0.298991 | 11 | 49350499 | 0.007576 | 0.59  | 11 | 49350499 | 0.0357 | 1.46E-10 |
| rs414992  | T  | C | C | 0.3128  | 0.007763 | 0.1365 | 0.133045 | 11 | 16872543 | 0.009972 | 0.44  | 11 | 16872543 | 0.0482 | 8.51E-11 |
| rs42377   | A  | G | G | -0.2575 | -0.0062  | 0.3172 | 0.113833 | 7  | 92614358 | 0.010957 | 0.57  | 7  | 92614358 | 0.0348 | 1.35E-13 |
| rs42398   | T  | C | C | 0.2195  | -0.00092 | 0.8279 | 0.521134 | 5  | 96784751 | 0.00671  | 0.89  | 5  | 96784751 | 0.0353 | 4.80E-10 |
| rs4572866 | T  | C | C | 0.2015  | 0.014132 | 0.6682 | 0.90562  | 4  | 26793981 | 0.011473 | 0.22  | 4  | 26793981 | 0.0289 | 3.06E-12 |
| rs4651224 | T  | C | C | 0.178   | -0.0019  | 0.4766 | 0.612152 | 1  | 1.85E+08 | 0.006974 | 0.79  | 1  | 1.85E+08 | 0.0276 | 1.13E-10 |

|           |       |   |   |         |          |        |          |    |          |          |       |    |          |        |          |
|-----------|-------|---|---|---------|----------|--------|----------|----|----------|----------|-------|----|----------|--------|----------|
| rs4681794 | C     | T | T | 0.2105  | -0.0034  | 0.6394 | 0.4378   | 3  | 56742880 | 0.006805 | 0.62  | 3  | 56742880 | 0.0345 | 1.02E-09 |
| rs4712120 | G     | T | T | -0.1971 | 0.001881 | 0.576  | 0.191402 | 6  | 56228118 | 0.008524 | 0.83  | 6  | 56228118 | 0.0333 | 3.19E-09 |
| rs4768862 | G     | A | A | -0.264  | -0.00263 | 0.6197 | 0.303074 | 12 | 50801044 | 0.007456 | 0.72  | 12 | 50801044 | 0.0343 | 1.34E-14 |
| rs4854572 | A     | G | G | -0.1819 | -0.0101  | 0.4388 | 0.268732 | 3  | 1.33E+08 | 0.007807 | 0.2   | 3  | 1.33E+08 | 0.027  | 1.53E-11 |
| rs4858758 | T     | C | C | -0.2318 | -0.0153  | 0.3923 | 0.440442 | 3  | 20075741 | 0.006945 | 0.028 | 3  | 20075741 | 0.0269 | 7.49E-18 |
| rs4980470 | A     | G | G | 0.1561  | -0.00368 | 0.5874 | 0.752642 | 11 | 50665628 | 0.00801  | 0.65  | 11 | 50665628 | 0.0274 | 1.15E-08 |
| rs544625  | A     | G | G | -0.1805 | 0.000769 | 0.6674 | 0.487272 | 11 | 30494949 | 0.006894 | 0.91  | 11 | 30494949 | 0.0281 | 1.26E-10 |
| rs555625  | C     | T | T | 0.3617  | 0.033393 | 0.9023 | 0.009846 | 5  | 1.23E+08 | 0.034929 | 0.34  | 5  | 1.23E+08 | 0.0589 | 8.46E-10 |
| rs5579955 | G     | C | C | 0.2034  | 0.004051 | 0.6546 | 0.358549 | 2  | 1.76E+08 | 0.0072   | 0.57  | 2  | 1.76E+08 | 0.0372 | 4.46E-08 |
| rs5607341 | A     | C | C | -0.4144 | -0.00263 | 0.1057 | 0.018012 | 2  | 24911142 | 0.02543  | 0.92  | 2  | 24911142 | 0.058  | 9.40E-13 |
| rs569550  | T     | G | G | -0.3991 | 0.001211 | 0.6064 | 0.324207 | 11 | 1865838  | 0.007168 | 0.87  | 11 | 1865838  | 0.0347 | 1.14E-30 |
| rs5740056 | A     | G | G | -0.2174 | -0.00459 | 0.2134 | 0.560759 | 4  | 88831125 | 0.006943 | 0.51  | 4  | 88831125 | 0.0397 | 4.34E-08 |
| rs5759103 | A     | G | G | 0.2358  | 0.009542 | 0.3041 | 0.42219  | 2  | 2.08E+08 | 0.006837 | 0.16  | 2  | 2.08E+08 | 0.0366 | 1.18E-10 |
| rs5786676 | C     | T | T | 0.306   | 0.001953 | 0.5435 | 0.540586 | 10 | 94263320 | 0.006882 | 0.78  | 10 | 94263320 | 0.0327 | 7.99E-21 |
| rs5787428 | A     | C | C | 0.156   | 0.002776 | 0.3989 | 0.244236 | 2  | 1.11E+08 | 0.007854 | 0.72  | 2  | 1.11E+08 | 0.0279 | 2.26E-08 |
| rs5965208 | T     | C | C | -0.4044 | 0.01006  | 0.1735 | 0.269693 | 11 | 47885798 | 0.007713 | 0.19  | 11 | 47885798 | 0.0475 | 1.57E-17 |
| rs6026739 | T     | A | A | -0.3899 | 0.003569 | 0.8587 | 0.063401 | 20 | 59164414 | 0.013878 | 0.8   | 20 | 59164414 | 0.0492 | 2.35E-15 |
| rs6031431 | G     | A | A | -0.2792 | 0.001936 | 0.5418 | 0.398655 | 20 | 44166512 | 0.007024 | 0.78  | 20 | 44166512 | 0.0333 | 5.65E-17 |
| rs6054200 | A     | G | G | 0.1644  | -0.01624 | 0.5898 | 0.866715 | 20 | 6384998  | 0.010052 | 0.11  | 20 | 6384998  | 0.0268 | 8.35E-10 |
| rs6069199 | C     | T | T | 0.3528  | 0.002064 | 0.6921 | 0.048031 | 12 | 20215335 | 0.015513 | 0.89  | 12 | 20215335 | 0.0368 | 1.03E-21 |
| rs6202076 | T     | C | C | -0.1738 | -0.00498 | 0.4871 | 0.3744   | 15 | 92737261 | 0.007055 | 0.48  | 15 | 92737261 | 0.0272 | 1.60E-10 |
| rs6237997 | T     | G | A | 0.2407  | 0.003358 | 0.4659 | 0.380884 | 5  | 1.15E+08 | 0.007113 | 0.64  | 5  | 1.15E+08 | 0.0325 | 1.39E-13 |
| rs6438253 | A     | G | G | 0.1737  | 0.006107 | 0.529  | 0.910663 | 3  | 1.15E+08 | 0.011843 | 0.61  | 3  | 1.15E+08 | 0.0267 | 7.67E-11 |
| rs6454092 | G     | A | A | 0.2277  | -0.00351 | 0.47   | 0.295149 | 6  | 78992255 | 0.007487 | 0.64  | 6  | 78992255 | 0.0333 | 7.53E-12 |
| rs6503413 | T     | C | C | -0.2513 | 0.002716 | 0.5323 | 0.221422 | 17 | 45063974 | 0.00804  | 0.74  | 17 | 45063974 | 0.0325 | 1.14E-14 |
| rs6595838 | A     | G | G | 0.3426  | 0.010828 | 0.3522 | 0.229347 | 5  | 1.29E+08 | 0.008076 | 0.18  | 5  | 1.29E+08 | 0.0357 | 9.06E-22 |
| rs6669371 | G     | T | T | 0.6877  | 0.013528 | 0.8429 | 0.146494 | 1  | 11822085 | 0.009582 | 0.16  | 1  | 11822085 | 0.0453 | 4.88E-52 |
| rs6672350 | A     | G | G | 0.2131  | -0.00114 | 0.692  | 0.598223 | 2  | 59836628 | 0.006969 | 0.87  | 2  | 59836628 | 0.0288 | 1.38E-13 |
| rs6689862 | T     | C | C | -0.3273 | 0.014542 | 0.9147 | 0.904419 | 1  | 28510931 | 0.01164  | 0.21  | 1  | 28510931 | 0.0519 | 2.85E-10 |
| rs6731208 | CTGAA | C | T | -0.2282 | -0.00096 | 0.2463 | 0.228626 | 2  | 1.91E+08 | 0.008251 | 0.91  | 2  | 1.91E+08 | 0.0385 | 3.19E-09 |
| rs6731373 | A     | G | G | 0.1815  | 0.001533 | 0.3309 | 0.147935 | 2  | 68275912 | 0.009508 | 0.87  | 2  | 68275912 | 0.0292 | 5.27E-10 |
| rs6760542 | A     | C | C | -0.2231 | -0.00853 | 0.3838 | 0.682037 | 3  | 26998960 | 0.007271 | 0.24  | 3  | 26998960 | 0.0379 | 4.01E-09 |
| rs6793656 | G     | A | A | -0.2657 | -0.0101  | 0.8567 | 0.084774 | 3  | 13781845 | 0.012282 | 0.41  | 3  | 13781845 | 0.0463 | 9.53E-09 |
| rs6815273 | A     | G | G | -0.3283 | -0.007   | 0.3927 | 0.441883 | 4  | 1.1E+08  | 0.006915 | 0.31  | 4  | 1.1E+08  | 0.038  | 5.70E-18 |
| rs693367  | A     | G | G | -0.1777 | 0.008148 | 0.659  | 0.886888 | 4  | 55394495 | 0.010059 | 0.42  | 4  | 55394495 | 0.0279 | 1.89E-10 |
| rs6954    | T     | C | C | -0.1512 | 0.008471 | 0.3853 | 0.462056 | 1  | 43450971 | 0.006895 | 0.22  | 1  | 43450971 | 0.0269 | 1.82E-08 |
| rs6963853 | A     | G | G | 0.1966  | -0.00448 | 0.4442 | 0.314841 | 7  | 1819089  | 0.007193 | 0.53  | 7  | 1819089  | 0.0337 | 5.41E-09 |
| rs7023828 | T     | C | C | -0.2278 | 0.012777 | 0.4287 | 0.352065 | 9  | 1.26E+08 | 0.007279 | 0.079 | 9  | 1.26E+08 | 0.0267 | 1.38E-17 |
| rs702814  | T     | C | C | -0.1963 | -0.0047  | 0.4861 | 0.037464 | 7  | 28133113 | 0.01708  | 0.78  | 7  | 28133113 | 0.0349 | 1.81E-08 |
| rs7042283 | T     | G | G | -0.2202 | 0.053549 | 0.8509 | 0.979347 | 9  | 68903111 | 0.024385 | 0.028 | 9  | 68903111 | 0.0369 | 2.52E-09 |
| rs7075018 | T     | C | C | 0.1987  | 0.011179 | 0.3436 | 0.411864 | 10 | 1.32E+08 | 0.007066 | 0.11  | 10 | 1.32E+08 | 0.0284 | 2.59E-12 |
| rs7125196 | C     | T | T | 0.2642  | -0.00965 | 0.8548 | 0.361431 | 11 | 61505093 | 0.007129 | 0.18  | 11 | 61505093 | 0.0472 | 2.18E-08 |

|             |     |   |   |         |          |        |          |    |          |          |       |    |          |        |          |
|-------------|-----|---|---|---------|----------|--------|----------|----|----------|----------|-------|----|----------|--------|----------|
| rs7128382 A | C   | A | C | 0.2688  | 0.003341 | 0.2123 | 0.552354 | 11 | 1.17E+08 | 0.006981 | 0.63  | 11 | 1.17E+08 | 0.0406 | 3.69E-11 |
| rs7134677 T | C   | T | C | -0.3406 | -0.00687 | 0.2925 | 0.394092 | 12 | 54047714 | 0.007002 | 0.33  | 12 | 54047714 | 0.0367 | 1.70E-20 |
| rs7173086 T | A   | T | A | 0.2486  | 0.003697 | 0.4654 | 0.67219  | 15 | 41217090 | 0.007228 | 0.61  | 15 | 41217090 | 0.0344 | 5.21E-13 |
| rs7218605 T | C   | T | C | -0.1822 | -0.01206 | 0.5037 | 0.494476 | 17 | 78815721 | 0.006813 | 0.077 | 17 | 78815721 | 0.0323 | 1.67E-08 |
| rs7226575 T | C   | T | C | -0.2999 | 0.027635 | 0.8304 | 0.962776 | 18 | 33589018 | 0.018475 | 0.13  | 18 | 33589018 | 0.0435 | 5.64E-12 |
| rs7245273 A | G   | A | G | -0.2354 | 0.010372 | 0.3347 | 0.329251 | 18 | 44494557 | 0.007259 | 0.15  | 18 | 44494557 | 0.0345 | 9.14E-12 |
| rs7275634 T | G   | T | G | -0.2047 | -0.00243 | 0.2739 | 0.371998 | 15 | 69305593 | 0.007141 | 0.73  | 15 | 69305593 | 0.0375 | 4.79E-08 |
| rs7282178 T | C   | T | C | -0.3366 | -0.01921 | 0.1307 | 0.040106 | 10 | 61684670 | 0.017306 | 0.27  | 10 | 61684670 | 0.0495 | 1.02E-11 |
| rs7283444 A | G   | A | G | 0.2613  | 0.00769  | 0.1195 | 0.026657 | 10 | 1.22E+08 | 0.020125 | 0.7   | 10 | 1.22E+08 | 0.0426 | 8.41E-10 |
| rs7286518 T | C   | T | C | -0.2245 | -0.01346 | 0.2381 | 0.079491 | 1  | 15468885 | 0.012483 | 0.28  | 1  | 15468885 | 0.0396 | 1.40E-08 |
| rs7291006 T | C   | T | C | 0.314   | -0.00853 | 0.1181 | 0.111671 | 11 | 46323584 | 0.010996 | 0.44  | 11 | 46323584 | 0.0433 | 4.25E-13 |
| rs7293174 A | G   | A | G | 0.2997  | -0.02966 | 0.901  | 0.981748 | 11 | 69979308 | 0.025228 | 0.24  | 11 | 69979308 | 0.046  | 7.25E-11 |
| rs7309990 T | C   | T | C | 0.3724  | 0.003782 | 0.0767 | 0.0317   | 12 | 53046995 | 0.018608 | 0.84  | 12 | 53046995 | 0.0647 | 8.77E-09 |
| rs7313782 A | G   | A | G | 0.2709  | -0.00404 | 0.2666 | 0.176753 | 12 | 90143493 | 0.00892  | 0.65  | 12 | 90143493 | 0.0408 | 3.29E-11 |
| rs731749 A  | G   | A | G | 0.32    | -0.00166 | 0.0783 | 0.037224 | 16 | 86322976 | 0.018471 | 0.93  | 16 | 86322976 | 0.0563 | 1.30E-08 |
| rs7406178 T | C   | C | G | -0.2909 | -0.0139  | 0.1101 | 0.006484 | 1  | 27387075 | 0.042953 | 0.75  | 1  | 27387075 | 0.044  | 3.81E-11 |
| rs7412 T    | C   | T | C | -0.3255 | -0.01288 | 0.0833 | 0.081172 | 19 | 44908822 | 0.012548 | 0.3   | 19 | 44908822 | 0.0486 | 2.08E-11 |
| rs750416 T  | C   | T | C | -0.1502 | 0.002779 | 0.4619 | 0.449808 | 2  | 1.21E+08 | 0.006855 | 0.69  | 2  | 1.21E+08 | 0.0271 | 3.12E-08 |
| rs7539215 T | G   | T | G | -0.5716 | 0.024615 | 0.1138 | 0.009846 | 19 | 7256232  | 0.034083 | 0.47  | 19 | 7256232  | 0.0546 | 1.31E-25 |
| rs7547570 A | G   | A | G | 0.168   | -0.01188 | 0.3986 | 0.518012 | 1  | 66542812 | 0.006739 | 0.078 | 1  | 66542812 | 0.027  | 4.55E-10 |
| rs7550273 C | G   | C | G | -0.1935 | 0.010495 | 0.3928 | 0.096542 | 1  | 2.08E+08 | 0.011446 | 0.36  | 1  | 2.08E+08 | 0.0336 | 8.50E-09 |
| rs758374 C  | T   | C | T | -0.2097 | -0.00793 | 0.71   | 0.237512 | 22 | 19984029 | 0.008027 | 0.32  | 22 | 19984029 | 0.0363 | 7.70E-09 |
| rs7601637 G | A   | G | A | 0.2175  | -0.00173 | 0.6938 | 0.383045 | 2  | 37766161 | 0.006981 | 0.8   | 2  | 37766161 | 0.0351 | 5.59E-10 |
| rs7620672 A | G   | A | G | -0.4119 | -0.0103  | 0.107  | 0.464217 | 7  | 40408372 | 0.006803 | 0.13  | 7  | 40408372 | 0.0566 | 3.43E-13 |
| rs7671947 C | T   | C | T | 0.3182  | 0.003797 | 0.8736 | 0.196686 | 4  | 53934592 | 0.008571 | 0.66  | 4  | 53934592 | 0.0532 | 2.22E-09 |
| rs7672622 A | G   | A | G | 0.2297  | 0.000198 | 0.7352 | 0.716859 | 4  | 1.57E+08 | 0.0075   | 0.98  | 4  | 1.57E+08 | 0.0314 | 2.54E-13 |
| rs7719885 G | A   | G | A | 0.3611  | -0.00501 | 0.6222 | 0.300192 | 5  | 1.58E+08 | 0.007421 | 0.5   | 5  | 1.58E+08 | 0.0344 | 7.99E-26 |
| rs7796089 C | G   | C | G | -0.221  | 0.006774 | 0.3394 | 0.285062 | 7  | 77882781 | 0.007537 | 0.37  | 7  | 77882781 | 0.0281 | 3.93E-15 |
| rs7837090 C | G   | C | G | 0.2201  | 1.80E-05 | 0.8081 | 0.81268  | 8  | 73309171 | 0.008919 | 1     | 8  | 73309171 | 0.034  | 9.24E-11 |
| rs7847526 C | T   | C | T | -0.2558 | -0.00524 | 0.8484 | 0.377762 | 9  | 1.1E+08  | 0.007145 | 0.46  | 9  | 1.1E+08  | 0.0467 | 4.26E-08 |
| rs7886611 A | ATG | C | T | -0.1883 | 0.005891 | 0.5353 | 0.349664 | 4  | 1.08E+08 | 0.007022 | 0.4   | 4  | 1.08E+08 | 0.0334 | 1.66E-08 |
| rs7889 C    | G   | C | G | -0.2499 | 0.001493 | 0.3904 | 0.228146 | 6  | 31637671 | 0.00821  | 0.86  | 6  | 31637671 | 0.033  | 3.73E-14 |
| rs7969298 T | C   | T | C | -0.3226 | -0.05436 | 0.0954 | 0.009366 | 3  | 1.55E+08 | 0.034054 | 0.11  | 3  | 1.55E+08 | 0.0586 | 3.70E-08 |
| rs7977128 A | T   | A | T | -0.2214 | -0.03182 | 0.8345 | 0.963257 | 17 | 60894370 | 0.018457 | 0.085 | 17 | 60894370 | 0.0364 | 1.15E-09 |
| rs8002127 G | A   | G | A | -0.5679 | -0.04384 | 0.9583 | 0.006484 | 13 | 73250287 | 0.04286  | 0.31  | 13 | 73250287 | 0.0894 | 2.13E-10 |
| rs8078112 C | T   | C | T | -0.1913 | 0.003433 | 0.5367 | 0.205331 | 17 | 62643001 | 0.008248 | 0.68  | 17 | 62643001 | 0.0344 | 2.65E-08 |
| rs8104223 G | A   | G | A | -0.2141 | -0.00727 | 0.7067 | 0.123679 | 19 | 15252666 | 0.010301 | 0.48  | 19 | 15252666 | 0.0367 | 5.33E-09 |
| rs8104559 T | C   | T | C | -0.2282 | 0.008011 | 0.8418 | 0.858069 | 19 | 22022365 | 0.009769 | 0.41  | 19 | 22022365 | 0.0367 | 4.89E-10 |
| rs821317 A  | G   | A | G | 0.2004  | -0.01015 | 0.1995 | 0.117435 | 9  | 1.38E+08 | 0.010703 | 0.34  | 9  | 1.38E+08 | 0.0353 | 1.42E-08 |
| rs896693 A  | G   | A | G | -0.166  | 0.00389  | 0.422  | 0.131364 | 11 | 1.2E+08  | 0.010043 | 0.7   | 11 | 1.2E+08  | 0.0278 | 2.25E-09 |
| rs9330353 A | T   | A | T | 0.2169  | 0.003796 | 0.4499 | 0.511287 | 4  | 1.38E+08 | 0.006869 | 0.58  | 4  | 1.38E+08 | 0.0273 | 2.03E-15 |
| rs9349379 G | A   | G | A | 0.2254  | 0.010662 | 0.6016 | 0.65634  | 6  | 12903725 | 0.007174 | 0.14  | 6  | 12903725 | 0.0354 | 1.83E-10 |



|             |   |   |   |         |          |        |          |    |          |          |      |    |          |        |          |
|-------------|---|---|---|---------|----------|--------|----------|----|----------|----------|------|----|----------|--------|----------|
| rs9356632 A | G | A | G | -0.2743 | -0.00756 | 0.1762 | 0.807157 | 6  | 1.7E+08  | 0.008213 | 0.36 | 6  | 1.7E+08  | 0.0367 | 7.27E-14 |
| rs9401025 C | A | C | A | 0.203   | -0.01238 | 0.5712 | 0.21854  | 6  | 1.18E+08 | 0.007991 | 0.12 | 6  | 1.18E+08 | 0.0354 | 9.27E-09 |
| rs9506725 T | C | T | C | 0.2172  | 0.045487 | 0.6487 | 0.987032 | 13 | 21740007 | 0.029433 | 0.12 | 13 | 21740007 | 0.0272 | 1.37E-15 |
| rs9508495 T | C | T | C | -0.2242 | -0.00503 | 0.6709 | 0.362632 | 13 | 29572064 | 0.006939 | 0.47 | 13 | 29572064 | 0.037  | 1.36E-09 |
| rs9532959 A | G | A | G | 0.3137  | -0.00939 | 0.0835 | 0.121037 | 13 | 41969380 | 0.010337 | 0.36 | 13 | 41969380 | 0.0499 | 3.37E-10 |
| rs9549328 T | C | T | C | 0.2665  | 0.010204 | 0.2246 | 0.235591 | 13 | 1.13E+08 | 0.008058 | 0.21 | 13 | 1.13E+08 | 0.0394 | 1.32E-11 |
| rs9818220 T | C | T | C | -0.2034 | 0.005026 | 0.7293 | 0.51537  | 3  | 30242829 | 0.006786 | 0.46 | 3  | 30242829 | 0.031  | 5.65E-11 |
| rs983016 G  | C | C | T | 0.1996  | -0.00303 | 0.4953 | 0.405139 | 4  | 38386666 | 0.007128 | 0.67 | 4  | 38386666 | 0.0329 | 1.29E-09 |
| rs9849301 T | C | T | C | 0.2284  | 0.007925 | 0.1412 | 0.1878   | 3  | 1.59E+08 | 0.008868 | 0.37 | 3  | 1.59E+08 | 0.0383 | 2.47E-09 |
| rs9912738 C | T | C | T | -0.2037 | 0.002966 | 0.6214 | 0.387848 | 17 | 49433222 | 0.006933 | 0.67 | 17 | 49433222 | 0.0354 | 8.62E-09 |

Supplementary Table 2g. List of SNPs for Diastolic BP (DBP) and their effects on TEWL

| SNP        | effect_allele | other_allele | effect_allele | other_allele | beta.DBP | beta.TEWL | eaf.DBP | eaf.TEWL | chr.TEWL | pos.TEWL | se.TEWL  | pval.TEWL | chr.DBP | pos.DBP  | se.DBP | pval.DBP |
|------------|---------------|--------------|---------------|--------------|----------|-----------|---------|----------|----------|----------|----------|-----------|---------|----------|--------|----------|
| chr1:14104 | T             | G            | T             | G            | 0.4383   | -0.00632  | 0.7778  | 0.104227 | 1        | 1410616  | 0.01126  | 0.57      | 1       | 1410616  | 0.0781 | 1.98E-08 |
| chr1:2045  | C             | G            | C             | G            | 0.1577   | 0.015079  | 0.7334  | 0.946206 | 1        | 2.05E+08 | 0.014803 | 0.31      | 1       | 2.05E+08 | 0.0271 | 6.08E-09 |
| chr12:111  | T             | C            | T             | C            | 0.1536   | -0.00864  | 0.4816  | 0.012968 | 12       | 1.11E+08 | 0.028479 | 0.76      | 12      | 1.11E+08 | 0.0255 | 1.70E-09 |
| chr15:713  | C             | A            | C             | A            | 0.1868   | -0.00014  | 0.5618  | 0.334054 | 15       | 71314327 | 0.007159 | 0.98      | 15      | 71314327 | 0.0252 | 1.22E-13 |
| chr16:562  | T             | G            | T             | G            | -0.1519  | -0.0079   | 0.4065  | 0.231508 | 16       | 56294901 | 0.008225 | 0.34      | 16      | 56294901 | 0.0271 | 2.04E-08 |
| chr3:1015  | C             | G            | C             | G            | 0.1373   | -0.00464  | 0.407   | 0.411623 | 3        | 1.02E+08 | 0.006901 | 0.5       | 3       | 1.02E+08 | 0.0192 | 9.23E-13 |
| chr3:1341  | T             | A            | T             | A            | 0.1719   | 0.052649  | 0.6932  | 0.010327 | 3        | 1.34E+08 | 0.034158 | 0.12      | 3       | 1.34E+08 | 0.0299 | 9.13E-09 |
| chr5:1235  | A             | G            | A             | G            | 0.1714   | 0.009167  | 0.4303  | 0.267051 | 5        | 1.24E+08 | 0.007887 | 0.25      | 5       | 1.24E+08 | 0.0253 | 1.26E-11 |
| chr5:1323  | C             | T            | C             | T            | 0.1483   | -0.04512  | 0.5313  | 0.011287 | 5        | 1.32E+08 | 0.031335 | 0.15      | 5       | 1.32E+08 | 0.0255 | 6.31E-09 |
| chr5:7570  | T             | C            | T             | C            | -0.1404  | 0.003833  | 0.5369  | 0.433718 | 5        | 75707853 | 0.006927 | 0.58      | 5       | 75707853 | 0.0257 | 4.46E-08 |
| chr6:2586  | T             | C            | T             | A            | -0.3103  | 0.031111  | 0.3528  | 0.019452 | 6        | 25866004 | 0.023883 | 0.19      | 6       | 25866004 | 0.0474 | 5.92E-11 |
| chr7:1067  | G             | T            | G             | T            | 0.2573   | -0.00234  | 0.6507  | 0.151537 | 7        | 1.07E+08 | 0.00946  | 0.8       | 7       | 1.07E+08 | 0.0306 | 4.42E-17 |
| chr7:1900  | G             | T            | G             | T            | 0.2072   | 0.002374  | 0.6395  | 0.350624 | 7        | 19006554 | 0.007276 | 0.74      | 7       | 19006554 | 0.0311 | 2.82E-11 |
| chr7:4592  | C             | G            | C             | G            | 0.228    | 0.005981  | 0.4472  | 0.714938 | 7        | 45921046 | 0.007427 | 0.42      | 7       | 45921046 | 0.0251 | 1.18E-19 |
| rs1017699  | C             | T            | C             | T            | -0.2275  | -0.0133   | 0.5928  | 0.068924 | 2        | 19508931 | 0.013239 | 0.32      | 2       | 19508931 | 0.0262 | 3.40E-18 |
| rs1092025  | A             | G            | A             | G            | -0.1723  | 0.022366  | 0.4061  | 0.080452 | 1        | 2.02E+08 | 0.012709 | 0.078     | 1       | 2.02E+08 | 0.0277 | 5.30E-10 |
| rs1092699  | G             | A            | G             | A            | -0.2022  | -0.00057  | 0.6023  | 0.242315 | 1        | 2.43E+08 | 0.007913 | 0.94      | 1       | 2.43E+08 | 0.0259 | 5.29E-15 |
| rs1122208  | T             | A            | T             | A            | 0.2736   | -0.00679  | 0.5851  | 0.030259 | 11       | 1.3E+08  | 0.019083 | 0.72      | 11      | 1.3E+08  | 0.0261 | 1.11E-25 |
| rs1189988  | G             | A            | G             | A            | -0.2549  | -0.04927  | 0.6448  | 0.004083 | 2        | 55875609 | 0.053972 | 0.36      | 2       | 55875609 | 0.037  | 5.92E-12 |
| rs1220317  | G             | C            | G             | C            | 0.219    | -0.01187  | 0.6788  | 0.103026 | 6        | 56129439 | 0.011094 | 0.28      | 6       | 56129439 | 0.0326 | 1.89E-11 |
| rs1220877  | C             | T            | C             | T            | -0.2679  | -0.00021  | 0.6101  | 0.430596 | 6        | 1.22E+08 | 0.006687 | 0.98      | 6       | 1.22E+08 | 0.0363 | 1.59E-13 |
| rs1250259  | T             | A            | T             | A            | 0.4275   | -0.0071   | 0.3196  | 0.118636 | 2        | 2.15E+08 | 0.010064 | 0.48      | 2       | 2.15E+08 | 0.0515 | 1.09E-16 |
| rs1279755  | A             | G            | A             | G            | 0.177    | -0.03477  | 0.3801  | 0.007205 | 11       | 1.17E+08 | 0.038211 | 0.36      | 11      | 1.17E+08 | 0.0292 | 1.36E-09 |
| rs1294351  | A             | G            | A             | G            | 0.1865   | 0.006388  | 0.3937  | 0.14001  | 17       | 4180628  | 0.009687 | 0.51      | 17      | 4180628  | 0.028  | 2.53E-11 |
| rs1303524  | T             | C            | T             | C            | 0.1606   | -0.00477  | 0.5232  | 0.602546 | 2        | 24911140 | 0.007057 | 0.5       | 2       | 24911140 | 0.0283 | 1.33E-08 |
| rs1322639  | G             | A            | G             | A            | -0.2352  | -0.01139  | 0.6172  | 0.420749 | 6        | 1.69E+08 | 0.006838 | 0.096     | 6       | 1.69E+08 | 0.0283 | 8.78E-17 |
| rs1773776  | C             | T            | C             | T            | -0.2621  | 0.006504  | 0.668   | 0.007685 | 2        | 46129994 | 0.038239 | 0.86      | 2       | 46129994 | 0.0402 | 6.78E-11 |
| rs2009598  | A             | G            | A             | G            | -0.1674  | -0.00081  | 0.443   | 0.35951  | 17       | 6567278  | 0.007101 | 0.91      | 17      | 6567278  | 0.027  | 5.90E-10 |
| rs2282978  | T             | C            | T             | C            | -0.1578  | 0.011835  | 0.6482  | 0.869597 | 7        | 92635096 | 0.010177 | 0.24      | 7       | 92635096 | 0.0247 | 1.58E-10 |
| rs2289124  | A             | G            | A             | G            | 0.2199   | 0.009791  | 0.3822  | 0.228626 | 11       | 89491309 | 0.008196 | 0.23      | 11      | 89491309 | 0.0328 | 1.98E-11 |
| rs2505084  | A             | G            | A             | G            | -0.1735  | 0.011235  | 0.4638  | 0.231268 | 10       | 30046591 | 0.008179 | 0.17      | 10      | 30046591 | 0.0248 | 2.88E-12 |
| rs2543029  | C             | A            | C             | A            | 0.2381   | -0.00044  | 0.633   | 0.303554 | 18       | 45518310 | 0.007546 | 0.95      | 18      | 45518310 | 0.03   | 1.95E-15 |
| rs2683696  | C             | T            | C             | T            | -0.3962  | -0.00489  | 0.5807  | 0.174832 | 3        | 41873406 | 0.009117 | 0.59      | 3       | 41873406 | 0.0305 | 1.36E-38 |
| rs268771   | C             | T            | C             | T            | 0.1344   | 0.006763  | 0.5043  | 0.213737 | 3        | 57952265 | 0.008164 | 0.41      | 3       | 57952265 | 0.0242 | 2.77E-08 |
| rs2894251  | C             | T            | C             | T            | 0.3443   | 0.022956  | 0.6531  | 0.023055 | 6        | 32375459 | 0.022402 | 0.31      | 6       | 32375459 | 0.0406 | 2.16E-17 |
| rs3130566  | C             | T            | C             | G            | 0.3056   | 0.008479  | 0.6478  | 0.153218 | 6        | 31134841 | 0.009523 | 0.37      | 6       | 31134841 | 0.0402 | 2.97E-14 |
| rs3130631  | A             | G            | A             | G            | -0.317   | 0.026295  | 0.3561  | 0.079251 | 6        | 31598391 | 0.012704 | 0.038     | 6       | 31598391 | 0.0419 | 3.98E-14 |
| rs3407044  | A             | G            | A             | G            | -0.1126  | 0.00723   | 0.5694  | 0.518972 | 5        | 1.48E+08 | 0.00681  | 0.29      | 5       | 1.48E+08 | 0.0178 | 2.45E-10 |
| rs3437018  | T             | G            | T             | G            | 0.2019   | 0.003336  | 0.3823  | 0.177474 | 1        | 59191237 | 0.008842 | 0.71      | 1       | 59191237 | 0.0284 | 1.20E-12 |
| rs365990   | G             | A            | G             | A            | -0.1937  | 0.000975  | 0.5291  | 0.179635 | 14       | 23392602 | 0.008878 | 0.91      | 14      | 23392602 | 0.025  | 8.88E-15 |

|           |   |        |   |   |         |          |        |          |    |          |          |       |    |          |        |          |
|-----------|---|--------|---|---|---------|----------|--------|----------|----|----------|----------|-------|----|----------|--------|----------|
| rs3786130 | C | T      | C | T | 0.1571  | -0.0185  | 0.5616 | 0.323247 | 17 | 62687682 | 0.007225 | 0.01  | 17 | 62687682 | 0.0254 | 6.59E-10 |
| rs3790228 | G | T      | G | T | 0.1759  | 0.000564 | 0.6088 | 0.501681 | 20 | 19488506 | 0.00687  | 0.93  | 20 | 19488506 | 0.0271 | 9.24E-11 |
| rs4894055 | A | G      | A | G | 0.324   | -0.03337 | 0.0864 | 0.974784 | 2  | 1.79E+08 | 0.021555 | 0.12  | 2  | 1.79E+08 | 0.0441 | 2.11E-13 |
| rs4925166 | T | C      | A | C | -0.1569 | 0.002024 | 0.4931 | 0.467339 | 17 | 18307496 | 0.006863 | 0.77  | 17 | 18307496 | 0.0201 | 6.57E-15 |
| rs6541001 | C | CT     | A | G | 0.3061  | 0.012187 | 0.8965 | 0.14073  | 1  | 11777310 | 0.009787 | 0.21  | 1  | 11777310 | 0.0451 | 1.15E-11 |
| rs6578061 | A | G      | A | G | 0.1465  | 0.006611 | 0.5068 | 0.503602 | 8  | 1.4E+08  | 0.006925 | 0.34  | 8  | 1.4E+08  | 0.0261 | 2.00E-08 |
| rs7500448 | G | A      | G | A | -0.2134 | 0.013632 | 0.6143 | 0.254563 | 16 | 83012185 | 0.007926 | 0.085 | 16 | 83012185 | 0.0303 | 1.95E-12 |
| rs7766549 | C | T      | C | T | 0.2259  | -0.0068  | 0.6284 | 0.384246 | 6  | 1.52E+08 | 0.006853 | 0.32  | 6  | 1.52E+08 | 0.0349 | 9.45E-11 |
| rs7987651 | T | C      | T | C | -0.1329 | -0.00718 | 0.1763 | 0.03194  | 13 | 1.1E+08  | 0.019093 | 0.71  | 13 | 1.1E+08  | 0.0237 | 2.05E-08 |
| rs8023114 | T | TAAATC | T | C | 0.2163  | -0.00428 | 0.4099 | 0.369116 | 14 | 91925611 | 0.006965 | 0.54  | 14 | 91925611 | 0.0274 | 2.64E-15 |
| rs8030926 | A | G      | A | G | -0.3319 | 0.020459 | 0.3552 | 0.947647 | 8  | 1.19E+08 | 0.015085 | 0.18  | 8  | 1.19E+08 | 0.0295 | 2.32E-29 |
| rs9467704 | T | C      | T | C | -0.3191 | 0.007629 | 0.345  | 0.04635  | 6  | 26319258 | 0.016266 | 0.64  | 6  | 26319258 | 0.0446 | 8.34E-13 |
| rs956006  | T | C      | T | C | 0.1595  | 0.009245 | 0.4183 | 0.266811 | 15 | 62516340 | 0.007777 | 0.23  | 15 | 62516340 | 0.0285 | 2.28E-08 |
| rs9644861 | C | T      | C | T | -0.1397 | -0.00152 | 0.515  | 0.331412 | 9  | 22090936 | 0.007346 | 0.84  | 9  | 22090936 | 0.0256 | 4.77E-08 |
| rs9821489 | A | G      | A | G | 0.4962  | 0.025092 | 0.4813 | 0.052354 | 3  | 53541701 | 0.01516  | 0.098 | 3  | 53541701 | 0.067  | 1.32E-13 |

Supplementary Table 2h. List of SNPs for Pulse Pressure (PP) and their effects on TEWL

| SNP        | effect_alle | other_allele | effect_alle | other_allele | beta.PP | beta.TEWL | eaf.PP | eaf.TEWL | chr.TEWL | pos.TEWL | se.TEWL  | pval.TEWL | chr.PP | pos.PP   | se.PP  | pval.PP  |
|------------|-------------|--------------|-------------|--------------|---------|-----------|--------|----------|----------|----------|----------|-----------|--------|----------|--------|----------|
| chr1:10734 | G           | C            | G           | C            | -0.1644 | 0.001291  | 0.6558 | 0.694765 | 1        | 10738432 | 0.007175 | 0.86      | 1      | 10738432 | 0.0259 | 2.35E-10 |
| chr1:20174 | C           | A            | C           | A            | -0.1975 | 0.002837  | 0.622  | 0.29611  | 1        | 2.02E+08 | 0.007545 | 0.71      | 1      | 2.02E+08 | 0.0259 | 2.65E-14 |
| chr1:50484 | A           | G            | A           | G            | -0.2792 | -0.0098   | 0.0866 | 0.086215 | 1        | 50488456 | 0.012202 | 0.42      | 1      | 50488456 | 0.0449 | 5.18E-10 |
| chr1:50994 | G           | A            | G           | A            | 0.2785  | 0.001312  | 0.8998 | 0.089577 | 1        | 50991528 | 0.012038 | 0.91      | 1      | 50991528 | 0.0423 | 4.43E-11 |
| chr1:56114 | A           | G            | A           | G            | 0.1956  | -0.00138  | 0.328  | 0.179155 | 1        | 56111252 | 0.008985 | 0.88      | 1      | 56111252 | 0.0274 | 9.28E-13 |
| chr10:1124 | T           | C            | T           | C            | 0.2209  | 0.008164  | 0.2904 | 0.052354 | 10       | 1.13E+08 | 0.014522 | 0.57      | 10     | 1.13E+08 | 0.0266 | 8.86E-17 |
| chr10:1844 | G           | C            | G           | C            | 0.2252  | 0.002543  | 0.7069 | 0.029539 | 10       | 18439030 | 0.019178 | 0.89      | 10     | 18439030 | 0.0279 | 7.57E-16 |
| chr10:5644 | C           | G            | C           | G            | -0.1789 | -0.00783  | 0.1204 | 0.123919 | 10       | 5647187  | 0.010396 | 0.45      | 10     | 5647187  | 0.032  | 2.31E-08 |
| chr11:1174 | G           | A            | G           | A            | 0.2518  | 0.003299  | 0.4751 | 0.342939 | 11       | 1.17E+08 | 0.007163 | 0.65      | 11     | 1.17E+08 | 0.0241 | 1.74E-25 |
| chr11:1874 | A           | G            | A           | G            | 0.2148  | -0.0046   | 0.3581 | 0.613593 | 11       | 1871700  | 0.006868 | 0.5       | 11     | 1871700  | 0.026  | 1.41E-16 |
| chr12:1234 | T           | A            | T           | A            | 0.2799  | -0.0087   | 0.9265 | 0.282181 | 12       | 1.23E+08 | 0.007695 | 0.26      | 12     | 1.23E+08 | 0.0512 | 4.47E-08 |
| chr13:3164 | T           | C            | T           | C            | 0.1512  | -0.0032   | 0.4717 | 0.098703 | 13       | 31605999 | 0.011505 | 0.78      | 13     | 31605999 | 0.0194 | 6.42E-15 |
| chr14:3544 | A           | G            | A           | G            | 0.1714  | -0.00327  | 0.4011 | 0.463737 | 14       | 35402011 | 0.006907 | 0.64      | 14     | 35402011 | 0.0248 | 5.19E-12 |
| chr14:7464 | T           | C            | T           | C            | -0.1245 | -0.00815  | 0.5111 | 0.797791 | 14       | 74613001 | 0.008415 | 0.33      | 14     | 74613001 | 0.0191 | 6.37E-11 |
| chr16:1294 | A           | C            | A           | C            | -0.1556 | 0.00648   | 0.5815 | 0.882565 | 16       | 1297716  | 0.010426 | 0.53      | 16     | 1297716  | 0.0201 | 1.13E-14 |
| chr16:2474 | G           | A            | G           | A            | 0.1758  | -0.0202   | 0.7338 | 0.128963 | 16       | 24741320 | 0.010232 | 0.048     | 16     | 24741320 | 0.0279 | 2.80E-10 |
| chr16:7304 | T           | C            | T           | C            | 0.1276  | 0.005081  | 0.7376 | 0.902257 | 16       | 73064057 | 0.011431 | 0.66      | 16     | 73064057 | 0.0223 | 1.14E-08 |
| chr17:6434 | T           | C            | T           | C            | -0.1442 | 0.001754  | 0.3926 | 0.308357 | 17       | 64304354 | 0.007422 | 0.81      | 17     | 64304354 | 0.0261 | 3.27E-08 |
| chr18:4554 | A           | C            | A           | C            | 0.3134  | 0.000423  | 0.219  | 0.301153 | 18       | 45517785 | 0.007546 | 0.96      | 18     | 45517785 | 0.0302 | 3.25E-25 |
| chr18:5554 | A           | G            | A           | G            | -0.1747 | 0.009273  | 0.859  | 0.982949 | 18       | 55585157 | 0.025338 | 0.71      | 18     | 55585157 | 0.0284 | 7.30E-10 |
| chr19:1514 | C           | T            | C           | T            | 0.2094  | 0.003272  | 0.7008 | 0.405379 | 19       | 15156052 | 0.006895 | 0.64      | 19     | 15156052 | 0.0279 | 6.07E-14 |
| chr19:4984 | T           | C            | T           | C            | 0.1284  | -0.01766  | 0.3558 | 0.276897 | 19       | 4980853  | 0.007609 | 0.02      | 19     | 4980853  | 0.0199 | 1.16E-10 |
| chr19:6644 | T           | C            | T           | C            | -0.1668 | 0.001962  | 0.8137 | 0.960135 | 19       | 664278   | 0.017253 | 0.91      | 19     | 664278   | 0.027  | 6.61E-10 |
| chr2:10554 | A           | G            | A           | G            | -0.1758 | -0.0194   | 0.1072 | 0.100865 | 2        | 1.06E+08 | 0.011111 | 0.081     | 2      | 1.06E+08 | 0.0313 | 1.87E-08 |
| chr2:18214 | C           | G            | C           | G            | -0.1918 | -0.00947  | 0.1561 | 0.259606 | 2        | 1.82E+08 | 0.007779 | 0.22      | 2      | 1.82E+08 | 0.0349 | 4.03E-08 |
| chr2:19524 | A           | C            | A           | C            | -0.2836 | -0.01375  | 0.3249 | 0.068444 | 2        | 19523852 | 0.013274 | 0.3       | 2      | 19523852 | 0.0259 | 7.93E-28 |
| chr2:20314 | G           | C            | G           | C            | 0.1859  | -0.00187  | 0.4763 | 0.346542 | 2        | 2.03E+08 | 0.007171 | 0.79      | 2      | 2.03E+08 | 0.0256 | 3.66E-13 |
| chr2:20674 | C           | T            | C           | T            | -0.2354 | -0.00566  | 0.479  | 0.251201 | 2        | 20679060 | 0.007943 | 0.48      | 2      | 20679060 | 0.0243 | 3.51E-22 |
| chr2:22624 | A           | C            | A           | C            | -0.1542 | -0.00025  | 0.3332 | 0.097743 | 2        | 2.26E+08 | 0.011375 | 0.98      | 2      | 2.26E+08 | 0.0259 | 2.65E-09 |
| chr2:26694 | T           | G            | T           | G            | -0.2461 | -0.00802  | 0.5707 | 0.280259 | 2        | 26692756 | 0.007348 | 0.27      | 2      | 26692756 | 0.026  | 2.55E-21 |
| chr20:1944 | A           | C            | A           | C            | 0.2685  | -0.00067  | 0.3181 | 0.513449 | 20       | 19488358 | 0.006844 | 0.92      | 20     | 19488358 | 0.0267 | 8.77E-24 |
| chr20:6674 | C           | G            | C           | G            | -0.1563 | 0.01121   | 0.5245 | 0.771374 | 20       | 6675381  | 0.008212 | 0.17      | 20     | 6675381  | 0.0192 | 3.32E-16 |
| chr3:10014 | A           | G            | A           | G            | 0.1876  | 0.031331  | 0.8232 | 0.990634 | 3        | 1E+08    | 0.034911 | 0.37      | 3      | 1E+08    | 0.026  | 5.66E-13 |
| chr3:11534 | A           | G            | A           | G            | 0.1228  | 0.006508  | 0.5201 | 0.911383 | 3        | 1.15E+08 | 0.01191  | 0.58      | 3      | 1.15E+08 | 0.0192 | 1.75E-10 |
| chr3:16044 | T           | C            | T           | C            | -0.1376 | -0.01162  | 0.4853 | 0.235351 | 3        | 1.6E+08  | 0.008079 | 0.15      | 3      | 1.6E+08  | 0.0247 | 2.43E-08 |
| chr3:16974 | C           | T            | C           | T            | 0.1976  | -0.00432  | 0.752  | 0.509846 | 3        | 1.7E+08  | 0.006846 | 0.53      | 3      | 1.7E+08  | 0.0291 | 1.07E-11 |
| chr4:14584 | G           | A            | G           | A            | -0.144  | 0.007321  | 0.5618 | 0.167867 | 4        | 1.46E+08 | 0.009095 | 0.42      | 4      | 1.46E+08 | 0.0261 | 3.28E-08 |
| chr4:27214 | T           | C            | T           | C            | -0.1395 | -0.00054  | 0.3922 | 0.37536  | 4        | 2721066  | 0.007006 | 0.94      | 4      | 2721066  | 0.0196 | 1.07E-12 |
| chr4:39414 | A           | T            | A           | T            | -0.1256 | -0.02317  | 0.6913 | 0.889289 | 4        | 39412030 | 0.010714 | 0.031     | 4      | 39412030 | 0.0211 | 2.58E-09 |
| chr4:85814 | G           | C            | G           | C            | -0.2485 | 0.007761  | 0.8606 | 0.153458 | 4        | 85810232 | 0.009555 | 0.42      | 4      | 85810232 | 0.036  | 5.41E-12 |

|             |    |   |   |         |          |        |          |    |          |          |         |    |          |        |          |
|-------------|----|---|---|---------|----------|--------|----------|----|----------|----------|---------|----|----------|--------|----------|
| chr5:3283:T | C  | T | C | -0.2268 | -0.0267  | 0.4085 | 0.338377 | 5  | 32831833 | 0.007337 | 0.00027 | 5  | 32831833 | 0.0248 | 5.54E-20 |
| chr5:7335:T | C  | T | C | 0.1618  | -0.01399 | 0.1999 | 0.032181 | 5  | 73351691 | 0.019465 | 0.47    | 5  | 73351691 | 0.0274 | 3.54E-09 |
| chr5:7570:T | C  | T | C | 0.1593  | 0.003833 | 0.5943 | 0.433718 | 5  | 75707853 | 0.006927 | 0.58    | 5  | 75707853 | 0.0264 | 1.51E-09 |
| chr6:1267:C | T  | C | T | -0.1482 | -0.00099 | 0.5815 | 0.435639 | 6  | 1.27E+08 | 0.006761 | 0.88    | 6  | 1.27E+08 | 0.0262 | 1.58E-08 |
| chr6:1592:A | G  | A | G | -0.1908 | -0.00332 | 0.5843 | 0.374159 | 6  | 1.59E+08 | 0.006978 | 0.63    | 6  | 1.59E+08 | 0.0252 | 4.06E-14 |
| chr6:2068:A | C  | A | C | 0.1302  | -0.00227 | 0.2643 | 0.338377 | 6  | 20686765 | 0.007258 | 0.75    | 6  | 20686765 | 0.0214 | 1.21E-09 |
| chr6:4338:A | G  | A | G | 0.196   | 0.013186 | 0.3962 | 0.341499 | 6  | 43381477 | 0.007312 | 0.071   | 6  | 43381477 | 0.026  | 4.42E-14 |
| chr6:7213:A | C  | A | C | 0.1613  | -0.00463 | 0.8219 | 0.95293  | 6  | 7213674  | 0.016246 | 0.78    | 6  | 7213674  | 0.0257 | 3.62E-10 |
| chr7:4597:G | C  | G | C | 0.4633  | 0.003803 | 0.5689 | 0.73487  | 7  | 45970501 | 0.007642 | 0.62    | 7  | 45970501 | 0.0247 | 2.44E-78 |
| chr8:1039:T | C  | T | C | 0.1869  | -0.00288 | 0.3578 | 0.220461 | 8  | 10390466 | 0.008358 | 0.73    | 8  | 10390466 | 0.0202 | 2.31E-20 |
| chr8:3838:A | T  | A | T | 0.152   | -0.01091 | 0.2345 | 0.302354 | 8  | 38385709 | 0.007443 | 0.14    | 8  | 38385709 | 0.0226 | 1.83E-11 |
| chr8:7567:A | C  | A | C | 0.2502  | 0.016664 | 0.5121 | 0.409462 | 8  | 75679645 | 0.006946 | 0.016   | 8  | 75679645 | 0.0247 | 4.45E-24 |
| chr9:1231:G | C  | G | C | 0.2261  | 0.005242 | 0.8128 | 0.568924 | 9  | 1.23E+08 | 0.006734 | 0.44    | 9  | 1.23E+08 | 0.0354 | 1.64E-10 |
| chr9:9241:A | G  | A | G | 0.1275  | -0.00905 | 0.6077 | 0.855427 | 9  | 92419346 | 0.009598 | 0.35    | 9  | 92419346 | 0.02   | 1.87E-10 |
| rs1008628 A | G  | A | G | 0.1197  | 0.003292 | 0.3113 | 0.211335 | 8  | 94974699 | 0.008178 | 0.69    | 8  | 94974699 | 0.0209 | 9.61E-09 |
| rs1008872 A | G  | A | G | -0.189  | 0.003722 | 0.5801 | 0.479827 | 8  | 1.4E+08  | 0.006872 | 0.59    | 8  | 1.4E+08  | 0.0254 | 1.07E-13 |
| rs1019525 T | C  | T | C | 0.1156  | 0.000905 | 0.5704 | 0.884726 | 2  | 1.65E+08 | 0.010655 | 0.93    | 2  | 1.65E+08 | 0.0197 | 4.51E-09 |
| rs1027095 A | T  | A | T | 0.1431  | 0.012504 | 0.5227 | 0.204371 | 7  | 90177982 | 0.008438 | 0.14    | 7  | 90177982 | 0.0189 | 3.93E-14 |
| rs1036821 A | G  | A | G | 0.1536  | 0.007503 | 0.2957 | 0.522815 | 8  | 1.35E+08 | 0.006947 | 0.28    | 8  | 1.35E+08 | 0.0272 | 1.66E-08 |
| rs1048798 A | T  | A | T | 0.1543  | 0.043243 | 0.1707 | 0.017531 | 7  | 90857507 | 0.025035 | 0.084   | 7  | 90857507 | 0.0259 | 2.73E-09 |
| rs1050923 G | GC | G | A | 0.2473  | -0.0187  | 0.1376 | 0.0305   | 1  | 1.54E+08 | 0.019461 | 0.34    | 1  | 1.54E+08 | 0.045  | 3.99E-08 |
| rs1061808 T | G  | T | G | -0.25   | 0.004217 | 0.3698 | 0.416667 | 6  | 32168770 | 0.007024 | 0.55    | 6  | 32168770 | 0.0249 | 1.09E-23 |
| rs1073243 T | C  | T | C | 0.1784  | 0.010207 | 0.445  | 0.557877 | 10 | 20748365 | 0.007009 | 0.15    | 10 | 20748365 | 0.025  | 8.58E-13 |
| rs1077061 G | A  | G | A | 0.2502  | -0.02148 | 0.7997 | 0.349904 | 12 | 20077705 | 0.007368 | 0.0036  | 12 | 20077705 | 0.0314 | 1.62E-15 |
| rs1083095 A | G  | A | G | -0.1188 | 0.003649 | 0.6985 | 0.539385 | 11 | 92951950 | 0.007007 | 0.6     | 11 | 92951950 | 0.0209 | 1.21E-08 |
| rs1085714 T | A  | T | A | -0.2136 | -0.0028  | 0.7235 | 0.398655 | 4  | 80259918 | 0.007081 | 0.69    | 4  | 80259918 | 0.0279 | 1.77E-14 |
| rs1095679 A | T  | A | T | 0.1574  | -0.00366 | 0.7017 | 0.616475 | 8  | 91242113 | 0.006924 | 0.6     | 8  | 91242113 | 0.0216 | 2.84E-13 |
| rs1100075 T | G  | T | G | -0.2218 | 0.011696 | 0.8663 | 0.813641 | 10 | 73710597 | 0.00865  | 0.18    | 10 | 73710597 | 0.037  | 2.12E-09 |
| rs1101090 A | T  | A | T | 0.1336  | -0.00117 | 0.507  | 0.566282 | 10 | 19645884 | 0.006964 | 0.87    | 10 | 19645884 | 0.0195 | 6.87E-12 |
| rs1108239 T | C  | T | C | -0.2353 | 0.010043 | 0.3331 | 0.329731 | 18 | 44491260 | 0.007262 | 0.17    | 18 | 44491260 | 0.0259 | 1.15E-19 |
| rs1118784 A | C  | A | C | -0.2729 | -0.00724 | 0.1188 | 0.239433 | 10 | 94296872 | 0.008318 | 0.38    | 10 | 94296872 | 0.0383 | 1.10E-12 |
| rs1119135 T | A  | T | A | 0.3377  | -0.00361 | 0.896  | 0.37536  | 10 | 1.03E+08 | 0.007091 | 0.61    | 10 | 1.03E+08 | 0.043  | 4.25E-15 |
| rs1122208 T | A  | T | A | -0.4622 | -0.00679 | 0.6581 | 0.030259 | 11 | 1.3E+08  | 0.019083 | 0.72    | 11 | 1.3E+08  | 0.0267 | 5.44E-67 |
| rs1125683 A | G  | A | G | 0.1808  | -0.02076 | 0.197  | 0.013449 | 10 | 10798572 | 0.029476 | 0.48    | 10 | 10798572 | 0.0253 | 9.68E-13 |
| rs1126684 A | G  | A | G | -0.3785 | -0.00192 | 0.0779 | 0.017771 | 5  | 1.09E+08 | 0.02516  | 0.94    | 5  | 1.09E+08 | 0.0463 | 2.80E-16 |
| rs1137442 T | G  | T | G | -0.1662 | 0.006372 | 0.4796 | 0.099904 | 12 | 65979721 | 0.011408 | 0.58    | 12 | 65979721 | 0.025  | 2.78E-11 |
| rs1146975 T | A  | T | C | 0.4622  | -0.04272 | 0.9267 | 0.01537  | 12 | 94283783 | 0.028116 | 0.13    | 12 | 94283783 | 0.0494 | 8.50E-21 |
| rs1155422 T | G  | T | G | -0.1685 | 0.008404 | 0.5118 | 0.127041 | 4  | 1.55E+08 | 0.010245 | 0.41    | 4  | 1.55E+08 | 0.0261 | 1.11E-10 |
| rs1177702 T | C  | T | C | -0.3563 | -0.00083 | 0.0435 | 0.06268  | 6  | 34161184 | 0.013879 | 0.95    | 6  | 34161184 | 0.0617 | 7.83E-09 |
| rs1185335 A | G  | A | G | 0.1798  | 0.001987 | 0.3548 | 0.303554 | 15 | 71329185 | 0.007351 | 0.79    | 15 | 71329185 | 0.0258 | 2.94E-12 |
| rs1189988 G | A  | G | A | 0.2701  | -0.04927 | 0.8602 | 0.004083 | 2  | 55875609 | 0.053972 | 0.36    | 2  | 55875609 | 0.038  | 1.15E-12 |
| rs1203421 T | G  | T | G | -0.1666 | 0.00145  | 0.4104 | 0.284342 | 1  | 41909802 | 0.007594 | 0.85    | 1  | 41909802 | 0.0268 | 5.07E-10 |

|              |   |   |   |         |           |        |          |    |          |          |       |    |          |        |           |
|--------------|---|---|---|---------|-----------|--------|----------|----|----------|----------|-------|----|----------|--------|-----------|
| rs1205445 A  | G | A | G | 0.1145  | -0.00038  | 0.3373 | 0.248799 | 20 | 38249344 | 0.007976 | 0.96  | 20 | 38249344 | 0.021  | 4.93E-08  |
| rs1210062 T  | C | T | C | 0.2067  | 0.009397  | 0.2024 | 0.772094 | 14 | 98169146 | 0.00808  | 0.24  | 14 | 98169146 | 0.0315 | 5.38E-11  |
| rs1220317 G  | C | G | C | -0.3528 | -0.01187  | 0.8396 | 0.103026 | 6  | 56129439 | 0.011094 | 0.28  | 6  | 56129439 | 0.0333 | 3.70E-26  |
| rs1222433 A  | G | A | G | 0.1406  | 0.006082  | 0.4863 | 0.508405 | 11 | 1.07E+08 | 0.006874 | 0.38  | 11 | 1.07E+08 | 0.0244 | 8.42E-09  |
| rs1226418 T  | C | T | C | 0.1845  | 0.007809  | 0.1806 | 0.021374 | 10 | 32001058 | 0.023734 | 0.74  | 10 | 32001058 | 0.0319 | 7.03E-09  |
| rs1240608 G  | C | G | C | 0.2275  | 0.020695  | 0.6564 | 0.206532 | 1  | 11861124 | 0.008325 | 0.013 | 1  | 11861124 | 0.0267 | 1.66E-17  |
| rs1241231 A  | G | A | G | 0.1541  | -0.01873  | 0.7737 | 0.853506 | 10 | 1.33E+08 | 0.00971  | 0.054 | 10 | 1.33E+08 | 0.0236 | 6.35E-11  |
| rs1241633 A  | T | A | T | -0.5987 | -0.00533  | 0.0909 | 0.260807 | 10 | 1.03E+08 | 0.007897 | 0.5   | 10 | 1.03E+08 | 0.0441 | 5.94E-42  |
| rs1242725 T  | C | T | C | -0.1991 | -0.00769  | 0.187  | 0.051873 | 12 | 50488738 | 0.014951 | 0.61  | 12 | 50488738 | 0.0349 | 1.18E-08  |
| rs1244917 T  | C | T | C | 0.2264  | -0.00082  | 0.5583 | 0.508646 | 16 | 75429114 | 0.006819 | 0.9   | 16 | 75429114 | 0.025  | 1.37E-19  |
| rs1245312 G  | A | G | A | 0.1554  | -0.00333  | 0.4698 | 0.458694 | 17 | 59968715 | 0.006762 | 0.62  | 17 | 59968715 | 0.0265 | 4.53E-09  |
| rs1246327 A  | T | A | T | 0.242   | -0.01011  | 0.2051 | 0.361431 | 19 | 7243073  | 0.007051 | 0.15  | 19 | 7243073  | 0.0329 | 1.79E-13  |
| rs1248500 A  | G | A | G | 0.4076  | 0.015622  | 0.0889 | 0.094621 | 22 | 40239272 | 0.011741 | 0.18  | 22 | 40239272 | 0.0494 | 1.48E-16  |
| rs1250259 T  | A | T | A | -0.4236 | -0.0071   | 0.7437 | 0.118636 | 2  | 2.15E+08 | 0.010064 | 0.48  | 2  | 2.15E+08 | 0.0517 | 2.54E-16  |
| rs1251116 T  | C | T | C | 0.1351  | 0.005517  | 0.6456 | 0.541787 | 4  | 94652847 | 0.006834 | 0.42  | 4  | 94652847 | 0.02   | 1.39E-11  |
| rs1256508 GT | G | G | T | 0.2916  | -0.00834  | 0.8959 | 0.07757  | 1  | 2.08E+08 | 0.012759 | 0.51  | 1  | 2.08E+08 | 0.0414 | 1.84E-12  |
| rs1270539 A  | G | A | G | 0.7464  | -0.00102  | 0.1908 | 0.148895 | 7  | 1.07E+08 | 0.009498 | 0.91  | 7  | 1.07E+08 | 0.0315 | 7.09E-124 |
| rs1280722 A  | G | A | G | -0.1585 | -0.00101  | 0.3475 | 0.31316  | 11 | 1.02E+08 | 0.007345 | 0.89  | 11 | 1.02E+08 | 0.0203 | 6.28E-15  |
| rs1296657 A  | G | A | G | -0.1798 | -0.03414  | 0.1232 | 0.012488 | 18 | 12736043 | 0.031075 | 0.27  | 18 | 12736043 | 0.0311 | 7.53E-09  |
| rs1298229 T  | G | T | G | 0.1862  | 0.000285  | 0.3398 | 0.058598 | 19 | 40541454 | 0.014169 | 0.98  | 19 | 40541454 | 0.0209 | 5.83E-19  |
| rs1302624 T  | C | T | C | -0.2918 | -0.00743  | 0.1744 | 0.379443 | 2  | 1.64E+08 | 0.007055 | 0.29  | 2  | 1.64E+08 | 0.0329 | 8.06E-19  |
| rs1308340 A  | G | A | G | 0.1142  | -0.0088   | 0.4304 | 0.465418 | 3  | 73197186 | 0.006744 | 0.19  | 3  | 73197186 | 0.0198 | 7.49E-09  |
| rs1316353 C  | G | C | G | -0.1563 | -0.00504  | 0.1623 | 0.220701 | 5  | 71772334 | 0.008161 | 0.54  | 5  | 71772334 | 0.0283 | 3.24E-08  |
| rs1322739 T  | C | T | C | -0.2193 | 0.009564  | 0.901  | 0.971182 | 7  | 46510929 | 0.019967 | 0.63  | 7  | 46510929 | 0.0325 | 1.52E-11  |
| rs1324167 C  | T | C | T | -0.1716 | 0.001212  | 0.7785 | 0.048511 | 7  | 73903956 | 0.016322 | 0.94  | 7  | 73903956 | 0.0311 | 3.50E-08  |
| rs13260 T    | G | T | G | 0.2548  | -0.0238   | 0.1314 | 0.012968 | 13 | 1.1E+08  | 0.029949 | 0.43  | 13 | 1.1E+08  | 0.0401 | 2.10E-10  |
| rs1326307 A  | C | A | C | 0.1863  | -0.00514  | 0.8133 | 0.788184 | 8  | 1.05E+08 | 0.008286 | 0.53  | 8  | 1.05E+08 | 0.0266 | 2.31E-12  |
| rs1328800 A  | G | A | G | 0.1587  | -0.01233  | 0.6415 | 0.794669 | 9  | 1.26E+08 | 0.008427 | 0.14  | 9  | 1.26E+08 | 0.0207 | 1.69E-14  |
| rs1329032 T  | C | T | C | -0.1575 | -0.00697  | 0.4919 | 0.380403 | 9  | 1.14E+08 | 0.006979 | 0.32  | 9  | 1.14E+08 | 0.0194 | 4.86E-16  |
| rs1330812 T  | C | T | C | -0.1827 | 0.012361  | 0.3345 | 0.404659 | 7  | 1.32E+08 | 0.006891 | 0.073 | 7  | 1.32E+08 | 0.0304 | 1.86E-09  |
| rs1333045 C  | T | C | T | -0.1728 | 0.001056  | 0.4894 | 0.510327 | 9  | 22119196 | 0.006952 | 0.88  | 9  | 22119196 | 0.0247 | 2.72E-12  |
| rs134077 A   | G | A | G | -0.1596 | -0.00314  | 0.42   | 0.482469 | 22 | 27667264 | 0.006796 | 0.64  | 22 | 27667264 | 0.0254 | 3.47E-10  |
| rs1436206 A  | G | A | G | -0.1068 | 0.002334  | 0.4846 | 0.695965 | 10 | 50360852 | 0.007419 | 0.75  | 10 | 50360852 | 0.0191 | 2.12E-08  |
| rs1489110 T  | G | T | G | 0.1715  | 0.000713  | 0.3777 | 0.825408 | 12 | 48318084 | 0.008438 | 0.93  | 12 | 48318084 | 0.0197 | 3.06E-18  |
| rs1557765 T  | C | T | C | 0.2227  | -0.0045   | 0.3713 | 0.362392 | 11 | 17382092 | 0.007071 | 0.52  | 11 | 17382092 | 0.0262 | 2.09E-17  |
| rs160337 AT  | A | T | G | -0.1597 | 0.013186  | 0.6681 | 0.057157 | 7  | 28588171 | 0.014705 | 0.37  | 7  | 28588171 | 0.0266 | 2.02E-09  |
| rs1630736 T  | C | T | C | -0.1271 | 0.000746  | 0.4609 | 0.547791 | 6  | 12295754 | 0.00676  | 0.91  | 6  | 12295754 | 0.0203 | 4.21E-10  |
| rs1646010 C  | G | C | G | 0.1343  | 0.004124  | 0.2537 | 0.398655 | 16 | 58515300 | 0.007108 | 0.56  | 16 | 58515300 | 0.0224 | 2.06E-09  |
| rs1675382 A  | G | A | G | 0.1325  | -3.33E-06 | 0.5186 | 0.197646 | 3  | 57959516 | 0.008466 | 1     | 3  | 57959516 | 0.0243 | 4.81E-08  |
| rs1695412 A  | G | A | G | 0.2116  | 0.021893  | 0.887  | 0.911383 | 16 | 80834007 | 0.012149 | 0.072 | 16 | 80834007 | 0.0333 | 2.11E-10  |
| rs174564 G   | A | G | A | 0.1696  | -0.0021   | 0.6728 | 0.588136 | 11 | 61820833 | 0.006612 | 0.75  | 11 | 61820833 | 0.0274 | 6.38E-10  |
| rs1760876 G  | A | G | A | -0.4936 | -0.02922  | 0.8796 | 0.009126 | 17 | 46935905 | 0.034426 | 0.4   | 17 | 46935905 | 0.0399 | 3.58E-35  |

|             |    |   |   |         |           |        |          |    |          |          |       |    |          |        |          |
|-------------|----|---|---|---------|-----------|--------|----------|----|----------|----------|-------|----|----------|--------|----------|
| rs1773776 C | A  | G | A | 0.3482  | 0.006504  | 0.8922 | 0.007685 | 2  | 46129994 | 0.038239 | 0.86  | 2  | 46129994 | 0.041  | 1.86E-17 |
| rs177992 A  | G  | A | G | -0.1226 | 0.011845  | 0.3544 | 0.133525 | 18 | 22483241 | 0.009864 | 0.23  | 18 | 22483241 | 0.0205 | 2.43E-09 |
| rs1800629 A | G  | A | G | 0.2902  | 0.02391   | 0.166  | 0.083093 | 6  | 31575254 | 0.012441 | 0.055 | 6  | 31575254 | 0.0327 | 7.66E-19 |
| rs1818275 T | C  | T | C | 0.5369  | -0.04597  | 0.9048 | 0.986792 | 15 | 48591742 | 0.029724 | 0.12  | 15 | 48591742 | 0.0423 | 7.60E-37 |
| rs1919865 T | A  | T | A | 0.3173  | -0.00198  | 0.7563 | 0.431796 | 6  | 1.22E+08 | 0.00668  | 0.77  | 6  | 1.22E+08 | 0.0345 | 3.71E-20 |
| rs193686 C  | T  | C | T | -0.1465 | -0.00193  | 0.6767 | 0.100624 | 7  | 1.17E+08 | 0.011286 | 0.86  | 7  | 1.17E+08 | 0.0265 | 3.09E-08 |
| rs200481 A  | T  | A | T | 0.3585  | 0.002305  | 0.0932 | 0.070125 | 6  | 27806054 | 0.013494 | 0.86  | 6  | 27806054 | 0.0441 | 4.20E-16 |
| rs2005950 A | G  | A | G | -0.1763 | -0.01798  | 0.1437 | 0.04611  | 21 | 45976680 | 0.016312 | 0.27  | 21 | 45976680 | 0.028  | 2.94E-10 |
| rs2011603 A | G  | A | G | 0.1432  | 0.006136  | 0.7256 | 0.589817 | 4  | 18023861 | 0.006827 | 0.37  | 4  | 18023861 | 0.0213 | 1.91E-11 |
| rs2023843 C | T  | C | T | 0.3618  | -0.00606  | 0.9072 | 0.341499 | 7  | 27203602 | 0.007021 | 0.39  | 7  | 27203602 | 0.0436 | 9.92E-17 |
| rs2069833 T | C  | T | C | -0.1816 | -0.0216   | 0.5874 | 0.981508 | 7  | 22728045 | 0.02332  | 0.35  | 7  | 22728045 | 0.0202 | 2.16E-19 |
| rs2071382 T | C  | T | C | 0.2317  | 0.002914  | 0.4374 | 0.180836 | 15 | 90884967 | 0.008652 | 0.74  | 15 | 90884967 | 0.0257 | 2.31E-19 |
| rs2075665 A | T  | A | T | 0.1672  | 0.006991  | 0.6078 | 0.575889 | 9  | 98987661 | 0.006986 | 0.32  | 9  | 98987661 | 0.0195 | 8.82E-18 |
| rs210314 T  | C  | T | C | -0.1278 | -0.00115  | 0.5558 | 0.65658  | 14 | 53655683 | 0.007336 | 0.88  | 14 | 53655683 | 0.0193 | 3.75E-11 |
| rs2104038 G | A  | G | A | 0.1727  | -0.01079  | 0.6819 | 0.067723 | 1  | 15649492 | 0.013351 | 0.42  | 1  | 15649492 | 0.027  | 1.69E-10 |
| rs2107595 A | G  | A | G | 0.5121  | 0.00132   | 0.1834 | 0.332373 | 7  | 19009765 | 0.007365 | 0.86  | 7  | 19009765 | 0.0331 | 5.08E-54 |
| rs2172745 T | TC | T | G | -0.2083 | 0.010436  | 0.2401 | 0.10927  | 5  | 1.58E+08 | 0.010862 | 0.34  | 5  | 1.58E+08 | 0.0293 | 1.09E-12 |
| rs2206815 C | A  | C | A | -0.3212 | 0.014663  | 0.5296 | 0.496878 | 20 | 10688540 | 0.006908 | 0.034 | 20 | 10688540 | 0.0257 | 6.34E-36 |
| rs2240716 T | C  | T | C | 0.2045  | -0.00793  | 0.2917 | 0.237512 | 22 | 19982173 | 0.008027 | 0.32  | 22 | 19982173 | 0.0271 | 4.49E-14 |
| rs2241003 G | C  | G | C | -0.156  | 0.006242  | 0.6014 | 0.473823 | 9  | 1.21E+08 | 0.006801 | 0.36  | 9  | 1.21E+08 | 0.0249 | 3.94E-10 |
| rs2254240 A | G  | A | G | -0.2275 | -4.25E-05 | 0.2321 | 0.565562 | 11 | 47335619 | 0.006675 | 0.99  | 11 | 47335619 | 0.0301 | 4.41E-14 |
| rs2282978 T | C  | T | C | 0.2988  | 0.011835  | 0.6456 | 0.869597 | 7  | 92635096 | 0.010177 | 0.24  | 7  | 92635096 | 0.0252 | 2.36E-32 |
| rs2286525 G | A  | G | A | 0.1853  | -0.00893  | 0.7332 | 0.399616 | 17 | 61394762 | 0.006965 | 0.2   | 17 | 61394762 | 0.0295 | 3.41E-10 |
| rs2286870 G | A  | G | A | 0.192   | 0.005025  | 0.6454 | 0.519212 | 17 | 1468702  | 0.006875 | 0.46  | 17 | 1468702  | 0.0266 | 5.56E-13 |
| rs2289125 A | C  | A | C | -0.3421 | 0.004962  | 0.3076 | 0.439001 | 11 | 89491285 | 0.006928 | 0.47  | 11 | 89491285 | 0.0308 | 1.19E-28 |
| rs2302417 A | T  | A | T | 0.14    | 0.000204  | 0.4666 | 0.3744   | 3  | 52780240 | 0.007073 | 0.98  | 3  | 52780240 | 0.0249 | 1.82E-08 |
| rs2306363 T | G  | T | G | -0.1782 | 0.012567  | 0.1948 | 0.252882 | 11 | 65638129 | 0.007743 | 0.1   | 11 | 65638129 | 0.0323 | 3.34E-08 |
| rs2325885 T | C  | T | C | -0.1969 | -0.00582  | 0.2368 | 0.183718 | 17 | 48213013 | 0.008804 | 0.51  | 17 | 48213013 | 0.0228 | 6.69E-18 |
| rs2366264 T | G  | T | G | -0.183  | 0.002839  | 0.4894 | 0.28122  | 2  | 85261888 | 0.00752  | 0.71  | 2  | 85261888 | 0.0251 | 2.93E-13 |
| rs2428939 A | G  | A | G | 0.1352  | -0.0063   | 0.6344 | 0.709894 | 7  | 77932977 | 0.007489 | 0.4   | 7  | 77932977 | 0.0202 | 2.08E-11 |
| rs2498323 A | G  | A | G | 0.3315  | -0.03923  | 0.0983 | 0.042507 | 4  | 3449382  | 0.016883 | 0.02  | 4  | 3449382  | 0.0407 | 3.88E-16 |
| rs2530244 A | G  | A | G | 0.1156  | -0.00135  | 0.4934 | 0.519452 | 5  | 1.41E+08 | 0.006889 | 0.84  | 5  | 1.41E+08 | 0.0195 | 2.93E-09 |
| rs255299 T  | C  | T | C | -0.1115 | -0.00198  | 0.5572 | 0.213497 | 5  | 1.73E+08 | 0.008171 | 0.81  | 5  | 1.73E+08 | 0.0195 | 1.12E-08 |
| rs256837 A  | C  | A | C | -0.148  | 0.016968  | 0.1941 | 0.024496 | 5  | 1.57E+08 | 0.02083  | 0.42  | 5  | 1.57E+08 | 0.0248 | 2.49E-09 |
| rs2569842 T | C  | T | C | 0.1429  | 0.007965  | 0.2847 | 0.532661 | 6  | 1648798  | 0.006814 | 0.24  | 6  | 1648798  | 0.0213 | 2.00E-11 |
| rs2643826 C | T  | C | T | 0.2353  | -0.00431  | 0.457  | 0.710615 | 3  | 27521497 | 0.007423 | 0.56  | 3  | 27521497 | 0.0273 | 6.11E-18 |
| rs267540 A  | G  | A | G | -0.1274 | -0.00712  | 0.6007 | 0.837896 | 3  | 37540352 | 0.009161 | 0.44  | 3  | 37540352 | 0.0195 | 6.15E-11 |
| rs2820444 A | G  | A | G | -0.1621 | 0.000711  | 0.2801 | 0.217819 | 1  | 2.2E+08  | 0.008236 | 0.93  | 1  | 2.2E+08  | 0.0218 | 9.52E-14 |
| rs2889121 T | C  | T | C | 0.254   | -0.00968  | 0.2931 | 0.413305 | 5  | 1.23E+08 | 0.006932 | 0.16  | 5  | 1.23E+08 | 0.0269 | 3.45E-21 |
| rs2911268 A | G  | A | G | -0.184  | 0.018528  | 0.2289 | 0.151297 | 16 | 89441587 | 0.009508 | 0.051 | 16 | 89441587 | 0.033  | 2.57E-08 |
| rs2971669 T | C  | T | C | 0.2183  | -0.00184  | 0.2754 | 0.350865 | 7  | 44192179 | 0.007125 | 0.8   | 7  | 44192179 | 0.029  | 5.31E-14 |
| rs2978456 C | T  | C | T | -0.1907 | -9.27E-06 | 0.5473 | 0.419308 | 8  | 42467247 | 0.006968 | 1     | 8  | 42467247 | 0.0271 | 1.95E-12 |

|           |    |   |   |   |         |          |        |          |    |          |          |        |    |          |        |          |
|-----------|----|---|---|---|---------|----------|--------|----------|----|----------|----------|--------|----|----------|--------|----------|
| rs3109083 | G  | T | G | T | -0.1667 | 0.00958  | 0.7154 | 0.259846 | 2  | 1.77E+08 | 0.007884 | 0.22   | 2  | 1.77E+08 | 0.0301 | 3.15E-08 |
| rs3176336 | A  | T | A | T | 0.1609  | 0.001865 | 0.5666 | 0.316763 | 6  | 36681039 | 0.007267 | 0.8    | 6  | 36681039 | 0.0198 | 3.90E-16 |
| rs3421960 | A  | G | A | G | -0.1681 | 0.005361 | 0.8531 | 0.855908 | 12 | 24607522 | 0.009772 | 0.58   | 12 | 24607522 | 0.0273 | 7.41E-10 |
| rs35436   | AT | A | A | G | 0.1385  | -0.0097  | 0.6052 | 0.291787 | 12 | 1.15E+08 | 0.007503 | 0.2    | 12 | 1.15E+08 | 0.0249 | 2.71E-08 |
| rs356926  | A  | G | A | G | -0.1499 | 0.001291 | 0.1575 | 0.128722 | 18 | 28749090 | 0.010103 | 0.9    | 18 | 28749090 | 0.027  | 2.95E-08 |
| rs3570285 | C  | G | C | G | -0.1798 | 0.003246 | 0.1982 | 0.170269 | 11 | 841284   | 0.008908 | 0.72   | 11 | 841284   | 0.0318 | 1.53E-08 |
| rs3611438 | A  | G | A | G | 0.1665  | 0.014019 | 0.8741 | 0.963497 | 6  | 84509360 | 0.018133 | 0.44   | 6  | 84509360 | 0.0302 | 3.47E-08 |
| rs365990  | G  | A | G | A | 0.2302  | 0.000975 | 0.5933 | 0.179635 | 14 | 23392602 | 0.008878 | 0.91   | 14 | 23392602 | 0.0256 | 2.34E-19 |
| rs3740781 | T  | C | T | C | 0.2127  | 0.00827  | 0.663  | 0.307157 | 11 | 45234375 | 0.007299 | 0.26   | 11 | 45234375 | 0.0272 | 5.67E-15 |
| rs3767199 | T  | G | T | G | -0.1206 | 0.003877 | 0.3563 | 0.119116 | 1  | 1.8E+08  | 0.010369 | 0.71   | 1  | 1.8E+08  | 0.0202 | 2.41E-09 |
| rs3798293 | G  | A | G | A | -0.1884 | 0.016233 | 0.7952 | 0.038184 | 6  | 96585494 | 0.01734  | 0.35   | 6  | 96585494 | 0.0324 | 5.90E-09 |
| rs379862  | T  | G | T | G | -0.1184 | -0.00589 | 0.6296 | 0.198607 | 19 | 34353658 | 0.008459 | 0.49   | 19 | 34353658 | 0.0211 | 2.03E-08 |
| rs4073778 | A  | C | A | C | -0.1839 | -0.00999 | 0.5529 | 0.334774 | 1  | 1.16E+08 | 0.007253 | 0.17   | 1  | 1.16E+08 | 0.0262 | 2.38E-12 |
| rs4534535 | T  | C | T | C | -0.1739 | 0.000973 | 0.1384 | 0.557157 | 11 | 46767141 | 0.006817 | 0.89   | 11 | 46767141 | 0.0292 | 2.55E-09 |
| rs464605  | T  | C | T | C | 0.1332  | -0.01101 | 0.7251 | 0.497839 | 5  | 56511543 | 0.006815 | 0.11   | 5  | 56511543 | 0.0214 | 4.42E-10 |
| rs4744239 | T  | C | T | C | 0.1152  | -0.01078 | 0.5758 | 0.553554 | 9  | 93404100 | 0.006784 | 0.11   | 9  | 93404100 | 0.0197 | 5.31E-09 |
| rs4795641 | T  | C | T | C | 0.114   | -0.01432 | 0.4935 | 0.372238 | 17 | 31760281 | 0.007092 | 0.043  | 17 | 31760281 | 0.0194 | 4.25E-09 |
| rs4803455 | A  | C | A | C | -0.1617 | 0.001342 | 0.4959 | 0.357349 | 19 | 41345604 | 0.007103 | 0.85   | 19 | 41345604 | 0.0248 | 7.58E-11 |
| rs4852780 | T  | C | T | C | 0.1526  | -0.01013 | 0.4262 | 0.148655 | 2  | 71392981 | 0.009532 | 0.29   | 2  | 71392981 | 0.0255 | 2.12E-09 |
| rs4894055 | A  | G | A | G | -0.2589 | -0.03337 | 0.086  | 0.974784 | 2  | 1.79E+08 | 0.021555 | 0.12   | 2  | 1.79E+08 | 0.0453 | 1.12E-08 |
| rs499594  | C  | T | C | T | -0.1479 | -0.01697 | 0.6926 | 0.089577 | 6  | 54111115 | 0.011897 | 0.15   | 6  | 54111115 | 0.0265 | 2.28E-08 |
| rs5021979 | T  | C | T | C | -0.1203 | -0.01178 | 0.7046 | 0.894332 | 8  | 1.16E+08 | 0.010596 | 0.27   | 8  | 1.16E+08 | 0.0218 | 3.61E-08 |
| rs5582407 | A  | G | A | G | 0.1923  | -0.01173 | 0.153  | 0.016811 | 4  | 1.74E+08 | 0.025443 | 0.64   | 4  | 1.74E+08 | 0.0351 | 4.49E-08 |
| rs5600066 | C  | A | C | A | 0.1444  | 0.007532 | 0.6284 | 0.200048 | 17 | 75882573 | 0.008553 | 0.38   | 17 | 75882573 | 0.0263 | 3.93E-08 |
| rs5602465 | T  | C | T | C | 0.2303  | 0.014517 | 0.1807 | 0.197887 | 4  | 1.47E+08 | 0.008739 | 0.097  | 4  | 1.47E+08 | 0.033  | 3.04E-12 |
| rs5628872 | G  | A | G | A | -0.2657 | -0.01978 | 0.6049 | 0.310999 | 17 | 62689774 | 0.007321 | 0.0069 | 17 | 62689774 | 0.0256 | 3.00E-25 |
| rs5635638 | T  | C | T | C | 0.1561  | -0.01118 | 0.7853 | 0.966138 | 19 | 4064059  | 0.018489 | 0.55   | 19 | 4064059  | 0.0243 | 1.37E-10 |
| rs5772    | C  | G | C | G | -0.1188 | 0.00583  | 0.596  | 0.571326 | 8  | 1.09E+08 | 0.006893 | 0.4    | 8  | 1.09E+08 | 0.0193 | 7.68E-10 |
| rs5847721 | T  | C | T | C | 0.1437  | -0.00052 | 0.2099 | 0.169789 | 4  | 1.03E+08 | 0.00915  | 0.95   | 4  | 1.03E+08 | 0.0248 | 6.48E-09 |
| rs5864682 | T  | C | T | C | -0.2414 | 0.010878 | 0.2403 | 0.262488 | 15 | 62513935 | 0.007821 | 0.16   | 15 | 62513935 | 0.032  | 4.41E-14 |
| rs5977682 | T  | C | T | C | 0.2076  | -0.00503 | 0.1634 | 0.09318  | 3  | 13785388 | 0.011818 | 0.67   | 3  | 13785388 | 0.0338 | 8.35E-10 |
| rs5988496 | T  | C | T | C | 0.2646  | -0.00806 | 0.1864 | 0.223343 | 21 | 28753586 | 0.008189 | 0.32   | 21 | 28753586 | 0.0326 | 4.48E-16 |
| rs6031431 | G  | A | G | A | -0.1523 | 0.001936 | 0.5416 | 0.398655 | 20 | 44166512 | 0.007024 | 0.78   | 20 | 44166512 | 0.025  | 1.08E-09 |
| rs6090040 | A  | C | A | C | 0.2159  | 0.001736 | 0.4804 | 0.358069 | 20 | 64060707 | 0.007143 | 0.81   | 20 | 64060707 | 0.0249 | 3.74E-18 |
| rs6142381 | A  | G | A | G | -0.1471 | 0.002271 | 0.5966 | 0.673631 | 20 | 35420820 | 0.007121 | 0.75   | 20 | 35420820 | 0.0195 | 5.27E-14 |
| rs6174863 | C  | G | C | G | -0.2793 | 0.012528 | 0.9302 | 0.916427 | 1  | 28466638 | 0.012412 | 0.31   | 1  | 28466638 | 0.0415 | 1.75E-11 |
| rs6177738 | T  | C | T | C | 0.1479  | -0.02906 | 0.2982 | 0.021614 | 1  | 42536084 | 0.022824 | 0.2    | 1  | 42536084 | 0.0215 | 5.80E-12 |
| rs6180887 | A  | G | A | G | -0.2267 | -0.00667 | 0.3154 | 0.360951 | 1  | 1.69E+08 | 0.006874 | 0.33   | 1  | 1.69E+08 | 0.0269 | 3.61E-17 |
| rs6182300 | G  | A | G | A | 0.3774  | -0.00419 | 0.9507 | 0.049712 | 1  | 1.77E+08 | 0.015951 | 0.79   | 1  | 1.77E+08 | 0.0594 | 2.04E-10 |
| rs6202076 | T  | C | T | C | -0.1209 | -0.00498 | 0.4898 | 0.3744   | 15 | 92737261 | 0.007055 | 0.48   | 15 | 92737261 | 0.0197 | 9.06E-10 |
| rs6203340 | A  | G | A | G | -0.1219 | 0.000526 | 0.5983 | 0.504083 | 16 | 53790314 | 0.006837 | 0.94   | 16 | 53790314 | 0.0197 | 6.36E-10 |
| rs6215551 | G  | A | G | A | 0.1526  | -0.00277 | 0.6164 | 0.443324 | 2  | 95991827 | 0.006849 | 0.69   | 2  | 95991827 | 0.0255 | 2.21E-09 |



|               |       |   |   |         |           |        |          |    |          |          |        |    |          |        |          |
|---------------|-------|---|---|---------|-----------|--------|----------|----|----------|----------|--------|----|----------|--------|----------|
| rs6225071 A   | G     | A | G | 0.1309  | -0.01306  | 0.6008 | 0.802834 | 3  | 85466626 | 0.008263 | 0.11   | 3  | 85466626 | 0.0197 | 2.99E-11 |
| rs6233428 A   | C     | A | C | 0.2171  | -0.00986  | 0.3944 | 0.303794 | 4  | 1.69E+08 | 0.007476 | 0.19   | 4  | 1.69E+08 | 0.0253 | 8.78E-18 |
| rs6421389 C   | G     | C | G | -0.1173 | -0.00625  | 0.5015 | 0.938521 | 10 | 88958770 | 0.013782 | 0.65   | 10 | 88958770 | 0.0199 | 3.59E-09 |
| rs6511029 T   | C     | C | A | 0.1871  | 0.022826  | 0.1682 | 0.036984 | 19 | 19360610 | 0.017355 | 0.19   | 19 | 19360610 | 0.0326 | 8.95E-09 |
| rs6535419 A   | G     | A | G | 0.1329  | -6.51E-05 | 0.7117 | 0.478146 | 4  | 82969822 | 0.006849 | 0.99   | 4  | 82969822 | 0.0215 | 6.22E-10 |
| rs6539284 T   | C     | T | C | 0.1279  | 0.002841  | 0.5863 | 0.872719 | 12 | 79198900 | 0.010176 | 0.78   | 12 | 79198900 | 0.0202 | 2.26E-10 |
| rs6595838 A   | G     | A | G | 0.2073  | 0.010828  | 0.351  | 0.229347 | 5  | 1.29E+08 | 0.008076 | 0.18   | 5  | 1.29E+08 | 0.0268 | 9.45E-15 |
| rs6599251 T   | G     | T | G | -0.1241 | -1.40E-05 | 0.5548 | 0.612152 | 3  | 38744318 | 0.007167 | 1      | 3  | 38744318 | 0.0192 | 1.10E-10 |
| rs6662330 T   | C     | T | C | 0.1426  | -0.00112  | 0.218  | 0.17243  | 1  | 66553045 | 0.008948 | 0.9    | 1  | 66553045 | 0.0236 | 1.42E-09 |
| rs666720 T    | C     | T | C | -0.1165 | 0.007869  | 0.5439 | 0.378963 | 1  | 45555123 | 0.007093 | 0.27   | 1  | 45555123 | 0.0193 | 1.56E-09 |
| rs6679045 A   | G     | A | G | 0.438   | 0.043003  | 0.0774 | 0.023295 | 6  | 26106860 | 0.021858 | 0.049  | 6  | 26106860 | 0.0476 | 3.82E-20 |
| rs6679817 T   | C     | T | C | 0.1533  | 0.005988  | 0.3421 | 0.304275 | 1  | 88897581 | 0.007367 | 0.42   | 1  | 88897581 | 0.0267 | 9.02E-09 |
| rs6730325 G   | A     | G | A | -0.1599 | 0.000304  | 0.638  | 0.152257 | 2  | 59088693 | 0.009535 | 0.97   | 2  | 59088693 | 0.0259 | 6.61E-10 |
| rs6742041 A   | G     | A | G | 0.1167  | 0.000555  | 0.693  | 0.597502 | 2  | 59841443 | 0.006948 | 0.94   | 2  | 59841443 | 0.0208 | 2.08E-08 |
| rs6763107 T   | C     | T | C | 0.2351  | 0.01651   | 0.5008 | 0.316042 | 1  | 37996149 | 0.007477 | 0.027  | 1  | 37996149 | 0.0254 | 1.93E-20 |
| rs6766170 A   | C     | A | C | -0.1423 | -0.00962  | 0.4843 | 0.261527 | 3  | 14837323 | 0.007733 | 0.21   | 3  | 14837323 | 0.0252 | 1.55E-08 |
| rs6792918 A   | C     | A | C | 0.2907  | 0.00037   | 0.9449 | 0.942603 | 3  | 44815512 | 0.014243 | 0.98   | 3  | 44815512 | 0.0429 | 1.21E-11 |
| rs6797165 G   | A     | G | A | 0.5241  | -0.00536  | 0.7233 | 0.175552 | 3  | 41846285 | 0.009095 | 0.56   | 3  | 41846285 | 0.0312 | 2.21E-63 |
| rs6848906 T   | C     | T | C | 0.1817  | 0.003272  | 0.1864 | 0.388569 | 4  | 1.1E+08  | 0.006933 | 0.64   | 4  | 1.1E+08  | 0.0318 | 1.09E-08 |
| rs6996562 A   | C     | A | C | 0.1235  | -0.01142  | 0.4732 | 0.641931 | 8  | 33534505 | 0.007088 | 0.11   | 8  | 33534505 | 0.0193 | 1.65E-10 |
| rs704191 T    | C     | T | C | 0.1492  | 0.018898  | 0.4449 | 0.342699 | 12 | 21862088 | 0.007274 | 0.0094 | 12 | 21862088 | 0.0195 | 1.73E-14 |
| rs7095095 G   | A     | G | A | 0.1809  | 0.008106  | 0.8071 | 0.103746 | 10 | 31072535 | 0.010982 | 0.46   | 10 | 31072535 | 0.0313 | 7.59E-09 |
| rs7134677 T   | C     | T | C | -0.1695 | -0.00687  | 0.2926 | 0.394092 | 12 | 54047714 | 0.007002 | 0.33   | 12 | 54047714 | 0.0275 | 6.71E-10 |
| rs7158073 T   | C     | T | C | 0.1877  | -0.00086  | 0.453  | 0.375841 | 14 | 99675352 | 0.006909 | 0.9    | 14 | 99675352 | 0.0245 | 1.67E-14 |
| rs7166269 T   | C     | T | C | 0.1579  | 0.009967  | 0.7805 | 0.809318 | 15 | 85423058 | 0.008811 | 0.26   | 15 | 85423058 | 0.0252 | 3.82E-10 |
| rs7197770 T   | TTCTG | G | A | 0.2026  | -0.00435  | 0.7085 | 0.178674 | 16 | 30704587 | 0.008177 | 0.59   | 16 | 30704587 | 0.0298 | 9.96E-12 |
| rs7219390 T   | C     | T | C | 0.1067  | -0.00128  | 0.575  | 0.64001  | 17 | 76688776 | 0.006991 | 0.85   | 17 | 76688776 | 0.0193 | 3.17E-08 |
| rs7226020 C   | T     | C | T | -0.2759 | -0.00126  | 0.5726 | 0.364313 | 17 | 6570508  | 0.007062 | 0.86   | 17 | 6570508  | 0.0264 | 1.61E-25 |
| rs7315818 T   | C     | T | C | 0.1837  | -0.00169  | 0.2725 | 0.044669 | 7  | 1.52E+08 | 0.016346 | 0.92   | 7  | 1.52E+08 | 0.028  | 5.30E-11 |
| rs7318734 T   | C     | T | C | 0.2407  | 0.008025  | 0.0583 | 0.911383 | 7  | 1.07E+08 | 0.012013 | 0.5    | 7  | 1.07E+08 | 0.0418 | 8.25E-09 |
| rs7320104 G   | A     | G | A | -0.2005 | -0.00642  | 0.7861 | 0.069885 | 13 | 1.14E+08 | 0.013213 | 0.63   | 13 | 1.14E+08 | 0.0329 | 1.14E-09 |
| rs7375405 A   | T     | A | T | 0.1284  | 0.002012  | 0.2599 | 0.237272 | 5  | 52860947 | 0.008078 | 0.8    | 5  | 52860947 | 0.0219 | 4.41E-09 |
| rs7412 T      | C     | T | C | -0.3606 | -0.01288  | 0.0833 | 0.081172 | 19 | 44908822 | 0.012548 | 0.3    | 19 | 44908822 | 0.0356 | 3.71E-24 |
| rs7418129 C   | T     | C | T | 0.23    | -0.00131  | 0.5797 | 0.32829  | 2  | 65056838 | 0.007166 | 0.86   | 2  | 65056838 | 0.0251 | 6.03E-20 |
| rs7500448 G   | A     | G | A | 0.3198  | 0.013632  | 0.7611 | 0.254563 | 16 | 83012185 | 0.007926 | 0.085  | 16 | 83012185 | 0.031  | 5.87E-25 |
| rs7502355 ACT | A     | A | G | -0.2349 | 0.012348  | 0.842  | 0.249039 | 15 | 78859743 | 0.007784 | 0.11   | 15 | 78859743 | 0.0336 | 2.57E-12 |
| rs7512595 A   | G     | A | G | 0.204   | -0.01532  | 0.8558 | 0.98463  | 1  | 27530660 | 0.027663 | 0.58   | 1  | 27530660 | 0.0321 | 1.96E-10 |
| rs7543389 G   | A     | G | A | 0.3066  | 0.002763  | 0.7371 | 0.181316 | 1  | 59214864 | 0.008824 | 0.75   | 1  | 59214864 | 0.0287 | 1.26E-26 |
| rs757462 T    | C     | T | C | -0.1346 | -0.01605  | 0.6507 | 0.725264 | 16 | 4246784  | 0.007512 | 0.033  | 16 | 4246784  | 0.021  | 1.48E-10 |
| rs7620672 A   | G     | A | G | -0.4336 | -0.0103   | 0.1069 | 0.464217 | 7  | 40408372 | 0.006803 | 0.13   | 7  | 40408372 | 0.0423 | 1.18E-24 |
| rs7632108 A   | C     | A | C | 0.1326  | 0.011432  | 0.4674 | 0.879683 | 3  | 37216572 | 0.010512 | 0.28   | 3  | 37216572 | 0.0195 | 1.11E-11 |
| rs7671947 C   | T     | C | T | 0.4471  | 0.003797  | 0.8744 | 0.196686 | 4  | 53934592 | 0.008571 | 0.66   | 4  | 53934592 | 0.0398 | 2.89E-29 |

|             |   |   |   |         |          |        |          |    |          |          |      |    |          |        |          |
|-------------|---|---|---|---------|----------|--------|----------|----|----------|----------|------|----|----------|--------|----------|
| rs7672622 A | G | A | G | 0.1327  | 0.000198 | 0.7358 | 0.716859 | 4  | 1.57E+08 | 0.0075   | 0.98 | 4  | 1.57E+08 | 0.0227 | 5.09E-09 |
| rs7707918 C | A | C | A | -0.212  | -0.01027 | 0.6171 | 0.298991 | 5  | 1.59E+08 | 0.007395 | 0.17 | 5  | 1.59E+08 | 0.0256 | 1.15E-16 |
| rs7727978 A | C | A | C | -0.1212 | -0.00494 | 0.6809 | 0.95269  | 5  | 1.2E+08  | 0.014691 | 0.74 | 5  | 1.2E+08  | 0.0207 | 5.25E-09 |
| rs7752448 G | A | G | A | -0.3397 | 0.006572 | 0.9087 | 0.088136 | 6  | 28333322 | 0.011926 | 0.58 | 6  | 28333322 | 0.0436 | 6.22E-15 |
| rs7757437 T | C | T | C | -0.1771 | 0.010416 | 0.8465 | 0.961095 | 9  | 19105640 | 0.017672 | 0.56 | 9  | 19105640 | 0.0271 | 6.58E-11 |
| rs7813925 T | C | T | C | 0.2697  | 0.009638 | 0.0892 | 0.131364 | 17 | 41800770 | 0.010349 | 0.35 | 17 | 41800770 | 0.0465 | 6.70E-09 |
| rs7914598 T | C | T | C | -0.2319 | 0.007636 | 0.1769 | 0.269452 | 11 | 47839194 | 0.007684 | 0.32 | 11 | 47839194 | 0.035  | 3.28E-11 |
| rs7968719 C | G | C | G | -0.1197 | -0.0072  | 0.4861 | 0.676753 | 12 | 57146968 | 0.007213 | 0.32 | 12 | 57146968 | 0.0203 | 3.55E-09 |
| rs8013933 T | C | T | C | 0.122   | -0.00977 | 0.703  | 0.646254 | 14 | 93999443 | 0.007198 | 0.17 | 14 | 93999443 | 0.0214 | 1.19E-08 |
| rs8027524 T | C | T | C | 0.1182  | 0.002134 | 0.3191 | 0.353506 | 15 | 49985422 | 0.007073 | 0.76 | 15 | 49985422 | 0.0206 | 8.80E-09 |
| rs8030926 A | G | A | G | 0.4663  | 0.020459 | 0.2092 | 0.947647 | 8  | 1.19E+08 | 0.015085 | 0.18 | 8  | 1.19E+08 | 0.0299 | 5.28E-55 |
| rs8044595 G | A | G | A | 0.1446  | -0.00944 | 0.63   | 0.291547 | 16 | 15812273 | 0.007452 | 0.21 | 16 | 15812273 | 0.0262 | 3.53E-08 |
| rs8102624 A | G | A | G | 0.4062  | -0.00585 | 0.1779 | 0.279059 | 19 | 2161444  | 0.007883 | 0.46 | 19 | 2161444  | 0.0395 | 9.03E-25 |
| rs9289798 G | T | G | T | -0.1595 | 0.010157 | 0.6947 | 0.284102 | 3  | 1.5E+08  | 0.007516 | 0.18 | 3  | 1.5E+08  | 0.0266 | 1.93E-09 |
| rs9305545 A | G | A | G | -0.1708 | 0.005685 | 0.1251 | 0.989914 | 21 | 34223520 | 0.032953 | 0.86 | 21 | 34223520 | 0.0311 | 4.07E-08 |
| rs9337951 A | G | A | G | 0.3282  | 0.019417 | 0.317  | 0.032901 | 10 | 30028144 | 0.018581 | 0.3  | 10 | 30028144 | 0.0298 | 3.23E-28 |
| rs9340995 C | G | C | G | 0.4665  | -0.00757 | 0.1236 | 0.379683 | 6  | 1.52E+08 | 0.006839 | 0.27 | 6  | 1.52E+08 | 0.0397 | 6.11E-32 |
| rs9349379 G | A | G | A | 0.2448  | 0.010662 | 0.6014 | 0.65634  | 6  | 12903725 | 0.007174 | 0.14 | 6  | 12903725 | 0.0264 | 2.08E-20 |
| rs9373387 G | A | G | A | -0.1856 | 0.00255  | 0.6348 | 0.01609  | 6  | 1.43E+08 | 0.024961 | 0.92 | 6  | 1.43E+08 | 0.0269 | 5.50E-12 |
| rs9477927 T | C | T | C | 0.1044  | 0.000258 | 0.561  | 0.563881 | 6  | 18913149 | 0.006975 | 0.97 | 6  | 18913149 | 0.0191 | 4.50E-08 |
| rs9506725 T | C | T | C | 0.1175  | 0.045487 | 0.6475 | 0.987032 | 13 | 21740007 | 0.029433 | 0.12 | 13 | 21740007 | 0.0198 | 2.90E-09 |
| rs9549328 T | C | T | C | 0.1996  | 0.010204 | 0.2244 | 0.235591 | 13 | 1.13E+08 | 0.008058 | 0.21 | 13 | 1.13E+08 | 0.0295 | 1.36E-11 |
| rs9633643 T | C | T | C | 0.17    | 0.003182 | 0.2236 | 0.257205 | 10 | 20224618 | 0.007756 | 0.68 | 10 | 20224618 | 0.0293 | 6.56E-09 |
| rs9658584 C | G | C | G | -0.1421 | 0.001871 | 0.2018 | 0.132085 | 1  | 85581628 | 0.01025  | 0.86 | 1  | 85581628 | 0.0246 | 7.41E-09 |
| rs9662255 A | C | A | C | -0.241  | 0.011152 | 0.4075 | 0.440922 | 1  | 9381890  | 0.006932 | 0.11 | 1  | 9381890  | 0.0256 | 4.68E-21 |
| rs968267 G  | A | G | A | 0.1733  | 0.012209 | 0.6093 | 0.198367 | 2  | 9157461  | 0.008638 | 0.16 | 2  | 9157461  | 0.0281 | 7.16E-10 |
| rs9708177 T | C | T | C | 0.308   | 0.01968  | 0.0791 | 0.070845 | 15 | 90105840 | 0.0134   | 0.14 | 15 | 90105840 | 0.0501 | 7.64E-10 |
| rs9937309 C | G | C | G | 0.1181  | -0.00578 | 0.2925 | 0.217819 | 16 | 11018255 | 0.008291 | 0.49 | 16 | 11018255 | 0.0209 | 1.70E-08 |
| rs998382 T  | G | T | C | -0.1418 | 0.001728 | 0.5957 | 0.098703 | 20 | 32796330 | 0.011335 | 0.88 | 20 | 32796330 | 0.0258 | 3.91E-08 |

Supplementary Table 2i. List of SNPs for Hypertension and their effects on TEWL

| SNP         | effect_alle | other_allele | effect_alle | other_allele | beta.hyper | beta.TEWL | eaf.hypert | eaf.TEWL | chr.TEWL | pos.TEWL | se.TEWL  | pval.TEWL | chr.hypert | pos.hypert | se.hyperte | pval.hypertension |
|-------------|-------------|--------------|-------------|--------------|------------|-----------|------------|----------|----------|----------|----------|-----------|------------|------------|------------|-------------------|
| chr12:895:G | A           | G            | A           | A            | 0.15       | -0.00357  | 0.18       | 0.191883 | 12       | 89548613 | 0.0085   | 0.67      | 12         | 88466521   | 0.03       | 7.10E-07          |
| chr12:896:C | T           | C            | T           | T            | 0.14       | -0.00108  | 0.19       | 0.29635  | 12       | 89619312 | 0.007286 | 0.88      | 12         | 88537220   | 0.03       | 8.40E-08          |
| chr12:896:C | G           | C            | G           | G            | 0.16       | -0.00059  | 0.17       | 0.299712 | 12       | 89680664 | 0.007289 | 0.94      | 12         | 88598572   | 0.03       | 2.20E-08          |
| rs1101416T  | A           | T            | A           | A            | 0.11       | -0.00533  | 0.17       | 0.158021 | 10       | 18419869 | 0.009171 | 0.56      | 10         | 18748804   | 0.02       | 7.80E-07          |
| rs1110535G  | A           | G            | A           | A            | 0.16       | -0.00055  | 0.17       | 0.29635  | 12       | 89632746 | 0.007286 | 0.94      | 12         | 88550654   | 0.03       | 1.80E-08          |
| rs1110536G  | T           | G            | T           | T            | 0.16       | -0.00059  | 0.17       | 0.299712 | 12       | 89675499 | 0.007289 | 0.94      | 12         | 88593407   | 0.03       | 2.10E-08          |
| rs1110537T  | C           | T            | C           | C            | 0.17       | 0.001347  | 0.16       | 0.293708 | 12       | 89696964 | 0.00735  | 0.85      | 12         | 88614872   | 0.03       | 2.80E-08          |
| rs1223007G  | A           | G            | A           | A            | 0.17       | 0.001554  | 0.16       | 0.293948 | 12       | 89697090 | 0.007351 | 0.83      | 12         | 88614998   | 0.03       | 2.80E-08          |
| rs1257930G  | A           | G            | A           | A            | 0.16       | -0.00064  | 0.17       | 0.29731  | 12       | 89656726 | 0.007297 | 0.93      | 12         | 88574634   | 0.03       | 2.20E-08          |
| rs1724975A  | G           | A            | G           | G            | 0.16       | -0.00052  | 0.17       | 0.299232 | 12       | 89666809 | 0.007288 | 0.94      | 12         | 88584717   | 0.03       | 2.20E-08          |
| rs2681472G  | A           | G            | A           | A            | 0.16       | -0.00034  | 0.17       | 0.295629 | 12       | 89615182 | 0.007292 | 0.96      | 12         | 88533090   | 0.03       | 1.70E-08          |
| rs4842666C  | T           | C            | T           | T            | 0.15       | 0.003274  | 0.17       | 0.3122   | 12       | 89547772 | 0.007257 | 0.65      | 12         | 88465680   | 0.03       | 3.40E-07          |
| rs743395 T  | C           | T            | C           | C            | 0.12       | 0.001795  | 0.38       | 0.111671 | 3        | 37556891 | 0.010542 | 0.86      | 3          | 37573386   | 0.02       | 7.50E-07          |
| rs7640747 G | C           | G            | C           | C            | 0.12       | 0.009521  | 0.38       | 0.160663 | 3        | 37555314 | 0.009211 | 0.3       | 3          | 37571809   | 0.02       | 4.80E-07          |

Supplementary Table 2j. List of SNPs for Heart Rate and their effects on TEWL

| SNP          | effect_alle | other_allele | effect_alle | other_allele | beta.HR | beta.TEWL | eaf.HR | eaf.TEWL | chr.TEWL | pos.TEWL | se.TEWL  | pval.TEWL | chr.HR | pos.HR   | se.HR  | pval.HR  |
|--------------|-------------|--------------|-------------|--------------|---------|-----------|--------|----------|----------|----------|----------|-----------|--------|----------|--------|----------|
| chr1:87427 A | G           | A            | G           |              | -0.3061 | -0.0122   | 0.33   | 0.46902  | 1        | 87427449 | 0.006868 | 0.076     | 1      | 87427449 | 0.0355 | 7.23E-18 |
| chr14:853 G  | A           | G            | A           |              | -0.4096 | 0.017411  | 0.28   | 0.085255 | 14       | 85330220 | 0.012251 | 0.16      | 14     | 85330220 | 0.0367 | 6.55E-29 |
| chr16:652 C  | T           | C            | T           |              | -0.2907 | 0.004106  | 0.43   | 0.183958 | 16       | 65252967 | 0.008434 | 0.63      | 16     | 65252967 | 0.0334 | 3.58E-18 |
| chr2:1591 C  | A           | C            | A           |              | -0.1844 | -0.0118   | 0.27   | 0.068444 | 2        | 1.59E+08 | 0.013047 | 0.37      | 2      | 1.59E+08 | 0.0372 | 7.00E-07 |
| chr2:2272 C  | T           | C            | T           |              | 0.2486  | -0.00204  | 0.33   | 0.598463 | 2        | 2.27E+08 | 0.006973 | 0.77      | 2      | 2.27E+08 | 0.0353 | 1.85E-12 |
| chr22:277 T  | C           | T            | C           |              | -0.1741 | 0.002381  | 0.45   | 0.401537 | 22       | 27785411 | 0.007065 | 0.74      | 22     | 27785411 | 0.0348 | 5.48E-07 |
| chr6:7542 T  | A           | C            | A           |              | 0.2403  | -0.00581  | 0.16   | 0.016571 | 6        | 7542890  | 0.026328 | 0.83      | 6      | 7542890  | 0.0459 | 1.60E-07 |
| chr7:1273 C  | G           | C            | G           |              | -0.2311 | 0.010075  | 0.27   | 0.93684  | 7        | 1.27E+08 | 0.014133 | 0.48      | 7      | 1.27E+08 | 0.0371 | 4.42E-10 |
| rs1050288 T  | C           | T            | C           |              | -0.2125 | 0.01411   | 0.34   | 0.634486 | 12       | 27802363 | 0.007029 | 0.045     | 12     | 27802363 | 0.0357 | 2.74E-09 |
| rs1073966 G  | A           | G            | A           |              | -0.2656 | 0.006537  | 0.45   | 0.346061 | 9        | 1.26E+08 | 0.007371 | 0.38      | 9      | 1.26E+08 | 0.0331 | 9.62E-16 |
| rs1082061 C  | G           | C            | G           |              | -0.1854 | -0.01872  | 0.21   | 0.039866 | 9        | 96433812 | 0.01725  | 0.28      | 9      | 96433812 | 0.0408 | 5.65E-06 |
| rs1084148 C  | T           | C            | T           |              | -0.2382 | 0.000151  | 0.22   | 0.034102 | 12       | 20319268 | 0.018959 | 0.99      | 12     | 20319268 | 0.0401 | 2.98E-09 |
| rs1108176 A  | G           | A            | G           |              | -0.2669 | -0.00199  | 0.15   | 0.341979 | 18       | 32423359 | 0.007083 | 0.78      | 18     | 32423359 | 0.0469 | 1.25E-08 |
| rs1108325 C  | A           | C            | A           |              | -0.2761 | -0.01515  | 0.17   | 0.017531 | 18       | 28186254 | 0.025998 | 0.56      | 18     | 28186254 | 0.0445 | 5.51E-10 |
| rs1178673 A  | G           | A            | G           |              | -0.6662 | 0.049782  | 0.04   | 0.993036 | 8        | 1.44E+08 | 0.040028 | 0.21      | 8      | 1.44E+08 | 0.0831 | 1.09E-15 |
| rs1192057 A  | G           | A            | G           |              | 0.2676  | -0.00383  | 0.26   | 0.231028 | 3        | 1.22E+08 | 0.00818  | 0.64      | 3      | 1.22E+08 | 0.0371 | 5.18E-13 |
| rs1250103 G  | C           | G            | C           |              | 0.2878  | 0.006766  | 0.31   | 0.087416 | 4        | 23949395 | 0.011861 | 0.57      | 4      | 23949395 | 0.0362 | 1.83E-15 |
| rs1257632 G  | A           | G            | A           |              | 0.2528  | 0.002017  | 0.34   | 0.270893 | 11       | 44958832 | 0.007765 | 0.8       | 11     | 44958832 | 0.0356 | 1.20E-12 |
| rs1257975 T  | C           | T            | C           |              | -0.2456 | -0.02799  | 0.23   | 0.054275 | 12       | 81825597 | 0.015081 | 0.063     | 12     | 81825597 | 0.0394 | 4.81E-10 |
| rs1260326 C  | T           | C            | T           |              | -0.2746 | 0.003182  | 0.39   | 0.538665 | 2        | 27508073 | 0.006816 | 0.64      | 2      | 27508073 | 0.0338 | 4.29E-16 |
| rs1271340 T  | G           | T            | G           |              | -0.1992 | 0.000591  | 0.38   | 0.60951  | 2        | 59779570 | 0.006894 | 0.93      | 2      | 59779570 | 0.0347 | 9.33E-09 |
| rs1272105 G  | C           | G            | C           |              | -0.2874 | 0.005947  | 0.18   | 0.104947 | 19       | 44918903 | 0.011143 | 0.59      | 19     | 44918903 | 0.0438 | 5.23E-11 |
| rs1288926 G  | A           | G            | A           |              | 0.4164  | 0.012985  | 0.16   | 0.047791 | 14       | 21074607 | 0.01581  | 0.41      | 14     | 21074607 | 0.0453 | 3.61E-20 |
| rs1294135 G  | A           | G            | A           |              | -0.1809 | 0.008668  | 0.42   | 0.101345 | 17       | 17813217 | 0.011203 | 0.44      | 17     | 17813217 | 0.0333 | 5.49E-08 |
| rs1300273 C  | A           | C            | A           |              | -0.3305 | 0.00048   | 0.24   | 0.262488 | 2        | 2.31E+08 | 0.007668 | 0.95      | 2      | 2.31E+08 | 0.0387 | 1.29E-17 |
| rs1316553 T  | A           | T            | A           |              | -0.221  | -0.00012  | 0.42   | 0.45389  | 5        | 30888476 | 0.006977 | 0.99      | 5      | 30888476 | 0.0335 | 4.31E-11 |
| rs1320761 T  | C           | T            | C           |              | 0.9018  | 0.000609  | 0.11   | 0.423391 | 6        | 1.22E+08 | 0.006678 | 0.93      | 6      | 1.22E+08 | 0.0531 | 1.22E-64 |
| rs1456482 C  | A           | C            | T           |              | 0.4038  | 0.005705  | 0.05   | 0.051153 | 18       | 22535366 | 0.015604 | 0.71      | 18     | 22535366 | 0.0768 | 1.48E-07 |
| rs1483890 G  | A           | G            | A           |              | 0.2836  | 0.007893  | 0.3    | 0.386167 | 3        | 69361574 | 0.006981 | 0.26      | 3      | 69361574 | 0.0359 | 2.54E-15 |
| rs1549118 T  | C           | T            | C           |              | 0.2003  | 0.003687  | 0.28   | 0.173631 | 14       | 77913341 | 0.008861 | 0.68      | 14     | 77913341 | 0.0367 | 4.67E-08 |
| rs1592560 C  | A           | C            | A           |              | -0.1826 | -0.00746  | 0.4    | 0.355187 | 16       | 10717830 | 0.007031 | 0.29      | 16     | 10717830 | 0.0346 | 1.34E-07 |
| rs1697419 A  | G           | A            | G           |              | 0.2436  | -0.00733  | 0.32   | 0.475264 | 19       | 40327563 | 0.006895 | 0.29      | 19     | 40327563 | 0.0359 | 1.11E-11 |
| rs1707989 A  | T           | A            | G           |              | 0.5196  | 0.002671  | 0.47   | 0.258405 | 6        | 1.18E+08 | 0.007944 | 0.74      | 6      | 1.18E+08 | 0.0332 | 2.95E-55 |
| rs1718048 C  | G           | C            | G           |              | -0.4896 | 0.004829  | 0.14   | 0.021854 | 14       | 72418763 | 0.022483 | 0.83      | 14     | 72418763 | 0.0554 | 9.15E-19 |
| rs1726551 C  | T           | C            | T           |              | 0.2398  | 0.012738  | 0.19   | 0.006964 | 20       | 41203988 | 0.041471 | 0.76      | 20     | 41203988 | 0.042  | 1.12E-08 |
| rs1770596 G  | A           | G            | A           |              | 0.3365  | -0.02722  | 0.19   | 0.011768 | 2        | 1.87E+08 | 0.030178 | 0.37      | 2      | 1.87E+08 | 0.0416 | 5.99E-16 |
| rs1788169 A  | G           | A            | G           |              | 0.5784  | 0.000948  | 0.18   | 0.053794 | 7        | 1.01E+08 | 0.01528  | 0.95      | 7      | 1.01E+08 | 0.0428 | 1.18E-41 |
| rs180239 C   | G           | C            | G           |              | -0.326  | 0.006077  | 0.35   | 0.748799 | 7        | 93921103 | 0.007894 | 0.44      | 7      | 93921103 | 0.0346 | 4.54E-21 |
| rs1994135 C  | T           | C            | T           |              | 0.4     | -0.0193   | 0.47   | 0.067003 | 12       | 33529470 | 0.013292 | 0.15      | 12     | 33529470 | 0.033  | 7.19E-34 |
| rs2076028 A  | G           | A            | G           |              | -0.2949 | 0.005767  | 0.29   | 0.424592 | 22       | 38754445 | 0.006902 | 0.4       | 22     | 38754445 | 0.0364 | 5.45E-16 |
| rs2283274 C  | G           | C            | G           |              | -0.4051 | -0.01161  | 0.18   | 0.417627 | 12       | 2075300  | 0.006941 | 0.094     | 12     | 2075300  | 0.0444 | 7.21E-20 |

|           |    |   |   |   |         |          |      |          |    |          |          |       |    |          |        |           |
|-----------|----|---|---|---|---------|----------|------|----------|----|----------|----------|-------|----|----------|--------|-----------|
| rs2358740 | T  | G | T | G | -0.2079 | 0.00295  | 0.32 | 0.283862 | 3  | 53421542 | 0.007502 | 0.69  | 3  | 53421542 | 0.0352 | 3.58E-09  |
| rs236349  | G  | A | G | A | 0.2812  | -0.01168 | 0.34 | 0.645293 | 6  | 36852789 | 0.007079 | 0.099 | 6  | 36852789 | 0.035  | 1.01E-15  |
| rs272564  | C  | A | C | A | 0.351   | 0.00142  | 0.28 | 0.56196  | 1  | 44546601 | 0.006834 | 0.84  | 1  | 44546601 | 0.0373 | 4.51E-21  |
| rs3749237 | A  | G | A | G | 0.2583  | 0.001087 | 0.32 | 0.176753 | 3  | 49732599 | 0.009021 | 0.9   | 3  | 49732599 | 0.0354 | 3.09E-13  |
| rs3915499 | A  | G | A | G | 0.303   | -0.00828 | 0.32 | 0.289145 | 16 | 15816886 | 0.007481 | 0.27  | 16 | 15816886 | 0.0354 | 1.24E-17  |
| rs4131241 | G  | C | G | C | -0.32   | -0.03654 | 0.15 | 0.022815 | 3  | 38579746 | 0.021683 | 0.092 | 3  | 38579746 | 0.047  | 1.34E-11  |
| rs4131799 | A  | G | A | G | 0.6304  | -0.00717 | 0.1  | 0.07757  | 1  | 2.08E+08 | 0.01276  | 0.57  | 1  | 2.08E+08 | 0.0545 | 5.42E-31  |
| rs41748   | G  | T | G | T | -0.1926 | 0.004076 | 0.45 | 0.455331 | 7  | 1.17E+08 | 0.006808 | 0.55  | 7  | 1.17E+08 | 0.0333 | 7.14E-09  |
| rs422068  | C  | T | C | T | 0.7307  | 0.001897 | 0.36 | 0.179875 | 14 | 23395595 | 0.008847 | 0.83  | 14 | 23395595 | 0.0343 | 1.52E-100 |
| rs4868243 | A  | G | A | G | -0.361  | -0.00862 | 0.16 | 0.501441 | 5  | 1.73E+08 | 0.006785 | 0.2   | 5  | 1.73E+08 | 0.0444 | 4.08E-16  |
| rs4894055 | T  | G | G | A | 1.0613  | 0.033372 | 0.09 | 0.025216 | 2  | 1.79E+08 | 0.021555 | 0.12  | 2  | 1.79E+08 | 0.058  | 7.86E-75  |
| rs4900069 | C  | A | C | A | 0.1999  | -0.01022 | 0.37 | 0.87488  | 14 | 91117029 | 0.010355 | 0.32  | 14 | 91117029 | 0.0343 | 5.38E-09  |
| rs4963772 | A  | G | A | G | -0.7139 | -0.00586 | 0.15 | 0.144813 | 12 | 24605546 | 0.009723 | 0.55  | 12 | 24605546 | 0.0465 | 3.23E-53  |
| rs5843797 | C  | T | C | T | -0.2402 | 0.000727 | 0.5  | 0.341739 | 7  | 35218665 | 0.007219 | 0.92  | 7  | 35218665 | 0.0343 | 2.61E-12  |
| rs6123471 | C  | T | C | T | -0.5953 | 0.012959 | 0.46 | 0.516811 | 20 | 38211754 | 0.006816 | 0.057 | 20 | 38211754 | 0.0332 | 6.63E-72  |
| rs6214405 | C  | T | C | T | 0.2246  | -0.00483 | 0.28 | 0.177714 | 2  | 66497930 | 0.008837 | 0.58  | 2  | 66497930 | 0.0429 | 1.62E-07  |
| rs6845865 | C  | T | C | T | -0.3423 | -0.00431 | 0.16 | 0.25048  | 4  | 1.48E+08 | 0.007973 | 0.59  | 4  | 1.48E+08 | 0.0448 | 2.25E-14  |
| rs7173389 | T  | A | T | A | -0.5393 | 0.030323 | 0.16 | 0.037464 | 15 | 73371562 | 0.017709 | 0.087 | 15 | 73371562 | 0.0453 | 1.31E-32  |
| rs7274760 | CT | C | G | C | 0.2558  | 0.000782 | 0.26 | 0.432277 | 1  | 2.18E+08 | 0.00679  | 0.91  | 1  | 2.18E+08 | 0.0378 | 1.29E-11  |
| rs7315870 | G  | A | G | A | 0.3929  | 0.005263 | 0.16 | 0.410903 | 7  | 1.37E+08 | 0.007063 | 0.46  | 7  | 1.37E+08 | 0.0451 | 2.81E-18  |
| rs748802  | A  | G | A | G | -0.2022 | -0.00592 | 0.34 | 0.277858 | 9  | 35909521 | 0.007602 | 0.44  | 9  | 35909521 | 0.0354 | 1.13E-08  |
| rs7519094 | A  | C | A | C | -0.4962 | 0.018153 | 0.09 | 0.080452 | 11 | 1.29E+08 | 0.012517 | 0.15  | 11 | 1.29E+08 | 0.0599 | 1.19E-16  |
| rs7612445 | T  | G | T | G | -0.4276 | 0.003415 | 0.19 | 0.178915 | 3  | 1.79E+08 | 0.008753 | 0.7   | 3  | 1.79E+08 | 0.042  | 2.41E-24  |
| rs7912176 | T  | C | T | C | -0.471  | 0.033607 | 0.09 | 0.009846 | 17 | 15291962 | 0.034101 | 0.32  | 17 | 15291962 | 0.0629 | 7.17E-14  |
| rs867400  | C  | T | C | T | 0.2983  | 0.000376 | 0.43 | 0.259606 | 12 | 64583070 | 0.007791 | 0.96  | 12 | 64583070 | 0.0334 | 4.58E-19  |
| rs907683  | T  | G | T | G | -0.3335 | -0.00268 | 0.43 | 0.725744 | 2  | 2.19E+08 | 0.007561 | 0.72  | 2  | 2.19E+08 | 0.0357 | 1.02E-20  |

Supplementary Table 2k. List of SNPs for C-reactive Protein and their effects on TEWL

| SNP         | effect_alle | other_allele | effect_alle | other_allele | beta.CRP | beta.TEWL | eaf.CRP | eaf.TEWL | chr.TEWL | pos.TEWL | se.TEWL  | pval.TEWL | chr.CRP | pos.CRP  | se.CRP | pval.CRP |
|-------------|-------------|--------------|-------------|--------------|----------|-----------|---------|----------|----------|----------|----------|-----------|---------|----------|--------|----------|
| chr1:1006:A | G           | A            | G           |              | 0.0173   | -0.00496  | 0.1501  | 0.68684  | 1        | 10065349 | 0.007336 | 0.5       | 1       | 10125407 | 0.003  | 4.65E-09 |
| chr1:1502:T | G           | T            | G           |              | 0.012    | -0.00184  | 0.07157 | 0.239193 | 1        | 1.5E+08  | 0.008093 | 0.82      | 1       | 1.5E+08  | 0.002  | 3.79E-09 |
| chr1:1779:A | G           | A            | G           |              | 0.0154   | 0.001808  | 0.2227  | 0.188521 | 1        | 1.78E+08 | 0.008712 | 0.84      | 1       | 1.78E+08 | 0.0023 | 4.82E-11 |
| chr1:1984:A | G           | A            | G           |              | 0.0256   | 0.012539  | 0.1352  | 0.446926 | 1        | 1.98E+08 | 0.006748 | 0.063     | 1       | 1.98E+08 | 0.0033 | 3.92E-15 |
| chr1:2003:T | C           | T            | C           |              | -0.0131  | -0.01367  | 0.2992  | 0.700288 | 1        | 2E+08    | 0.007454 | 0.067     | 1       | 2E+08    | 0.0022 | 4.96E-09 |
| chr1:2149:A | G           | A            | G           |              | -0.0182  | -0.01042  | 0.4016  | 0.619116 | 1        | 21493549 | 0.007167 | 0.15      | 1       | 21820042 | 0.0021 | 1.71E-17 |
| chr1:4359:A | G           | A            | G           |              | -0.0131  | -0.00763  | 0.3539  | 0.193324 | 1        | 43594812 | 0.008642 | 0.38      | 1       | 44060483 | 0.002  | 1.25E-10 |
| chr1:6265:T | C           | T            | C           |              | 0.0136   | -0.0104   | 0.3012  | 0.769693 | 1        | 62651339 | 0.007988 | 0.19      | 1       | 63117010 | 0.0021 | 2.01E-10 |
| chr1:7679:T | G           | T            | G           |              | 0.0114   | 0.01226   | 0.4105  | 0.303314 | 1        | 7679080  | 0.007407 | 0.098     | 1       | 7739140  | 0.002  | 2.16E-08 |
| chr1:9106:A | C           | A            | C           |              | 0.0349   | 0.003627  | 0.1899  | 0.865514 | 1        | 91064875 | 0.010028 | 0.72      | 1       | 91530432 | 0.0025 | 8.68E-43 |
| chr11:103:A | ACT         | A            | C           |              | -0.0133  | 0.003412  | 0.4682  | 0.480788 | 11       | 10381992 | 0.006837 | 0.62      | 11      | 10404252 | 0.0023 | 1.35E-08 |
| chr11:117:A | C           | A            | C           |              | 0.0118   | 0.010833  | 0.494   | 0.242075 | 11       | 11798902 | 0.007932 | 0.17      | 11      | 11820449 | 0.002  | 6.84E-09 |
| chr11:162:A | T           | A            | T           |              | 0.0129   | 0.009725  | 0.4165  | 0.504803 | 11       | 16229705 | 0.006873 | 0.16      | 11      | 16251251 | 0.002  | 2.37E-10 |
| chr11:555:A | G           | A            | G           |              | -0.0294  | 0.007202  | 0.1322  | 0.150817 | 11       | 55583022 | 0.009373 | 0.44      | 11      | 55371381 | 0.0035 | 2.01E-17 |
| chr11:617:C | G           | C            | G           |              | -0.0145  | 0.001069  | 0.338   | 0.870797 | 11       | 61752514 | 0.010132 | 0.92      | 11      | 61519986 | 0.0021 | 1.19E-11 |
| chr12:120:A | G           | A            | G           |              | 0.0823   | -0.00472  | 0.3897  | 0.585255 | 12       | 1.21E+08 | 0.006838 | 0.49      | 12      | 1.21E+08 | 0.0021 | 0        |
| chr12:215:T | C           | T            | C           |              | 0.0185   | -0.00514  | 0.2296  | 0.244476 | 12       | 21557815 | 0.007965 | 0.52      | 12      | 21710749 | 0.0025 | 3.64E-13 |
| chr12:459:T | C           | T            | C           |              | 0.0139   | 0.017158  | 0.2396  | 0.151297 | 12       | 45928666 | 0.00953  | 0.072     | 12      | 46322449 | 0.0024 | 1.28E-08 |
| chr12:900:T | C           | T            | C           |              | 0.0159   | 0.003602  | 0.4851  | 0.316042 | 12       | 90068229 | 0.007395 | 0.63      | 12      | 90462006 | 0.002  | 5.79E-15 |
| chr14:964:T | C           | T            | C           |              | 0.0198   | -0.00444  | 0.2843  | 0.818444 | 14       | 96467077 | 0.008905 | 0.62      | 14      | 96933414 | 0.0022 | 9.60E-19 |
| chr15:583:A | G           | A            | G           |              | 0.0147   | -0.00044  | 0.3648  | 0.463497 | 15       | 58391167 | 0.006731 | 0.95      | 15      | 58683366 | 0.002  | 5.23E-13 |
| chr16:211:A | G           | A            | G           |              | -0.0317  | -0.03779  | 0.07157 | 0.009846 | 16       | 2119457  | 0.034911 | 0.28      | 16      | 2169458  | 0.0042 | 3.10E-14 |
| chr16:537:A | G           | A            | G           |              | -0.0266  | -0.0025   | 0.4344  | 0.846302 | 16       | 53772541 | 0.009547 | 0.79      | 16      | 53806453 | 0.002  | 5.35E-39 |
| chr16:839:T | C           | T            | C           |              | -0.0165  | 0.004349  | 0.3837  | 0.209654 | 16       | 83945712 | 0.008289 | 0.6       | 16      | 83979317 | 0.0021 | 1.19E-14 |
| chr17:161:T | C           | T            | C           |              | 0.0158   | 0.008833  | 0.4344  | 0.229827 | 17       | 16180370 | 0.008021 | 0.27      | 17      | 16083684 | 0.002  | 8.54E-15 |
| chr17:639:T | C           | T            | C           |              | 0.0152   | 0.014919  | 0.2227  | 0.919549 | 17       | 63946431 | 0.012465 | 0.23      | 17      | 62023791 | 0.0026 | 9.36E-09 |
| chr17:702:A | C           | A            | C           |              | 0.0166   | -0.00188  | 0.2744  | 0.438521 | 17       | 70261597 | 0.006873 | 0.78      | 17      | 68257738 | 0.0023 | 1.35E-12 |
| chr17:747:T | C           | T            | C           |              | 0.0281   | -0.00871  | 0.2734  | 0.548031 | 17       | 74706775 | 0.006892 | 0.21      | 17      | 72702914 | 0.0023 | 3.56E-33 |
| chr17:783:A | G           | A            | G           |              | -0.0334  | -0.00959  | 0.2137  | 0.48487  | 17       | 78361793 | 0.006762 | 0.16      | 17      | 76357874 | 0.0027 | 5.74E-34 |
| chr18:127:T | C           | T            | C           |              | -0.0237  | -0.00582  | 0.4294  | 0.599424 | 18       | 12783899 | 0.007099 | 0.41      | 18      | 12783898 | 0.002  | 2.61E-31 |
| chr18:481:T | C           | T            | C           |              | 0.0141   | -0.00801  | 0.3489  | 0.582373 | 18       | 48137416 | 0.006984 | 0.25      | 18      | 45663787 | 0.0021 | 4.26E-11 |
| chr19:350:T | C           | T            | C           |              | -0.0305  | -0.03135  | 0.06163 | 0.865994 | 19       | 35062437 | 0.009957 | 0.0016    | 19      | 35553341 | 0.0041 | 6.93E-14 |
| chr19:357:T | C           | T            | C           |              | -0.0118  | -0.01016  | 0.3519  | 0.481028 | 19       | 35785184 | 0.006763 | 0.13      | 19      | 36276086 | 0.0021 | 3.41E-08 |
| chr19:512:T | C           | T            | C           |              | -0.02    | 0.000255  | 0.3101  | 0.182757 | 19       | 51225221 | 0.008829 | 0.98      | 19      | 51728477 | 0.0021 | 8.43E-21 |
| chr19:807:C | G           | C            | G           |              | -0.0132  | 0.001355  | 0.3648  | 0.576609 | 19       | 807442   | 0.006971 | 0.85      | 19      | 807442   | 0.0022 | 3.79E-09 |
| chr2:1021:A | G           | A            | G           |              | 0.0223   | -0.01644  | 0.2505  | 0.210134 | 2        | 1.02E+08 | 0.008424 | 0.051     | 2       | 1.03E+08 | 0.0023 | 1.68E-21 |
| chr2:1773:T | C           | T            | C           |              | 0.0169   | 0.000218  | 0.2207  | 0.103026 | 2        | 1.77E+08 | 0.011083 | 0.98      | 2       | 1.78E+08 | 0.0024 | 4.64E-12 |
| chr2:2131:A | G           | A            | G           |              | 0.021    | 0.005907  | 0.3936  | 0.091979 | 2        | 2.13E+08 | 0.011438 | 0.61      | 2       | 2.14E+08 | 0.002  | 6.16E-25 |
| chr2:2314:T | C           | T            | C           |              | -0.0133  | -0.00159  | 0.3748  | 0.383766 | 2        | 2.31E+08 | 0.007108 | 0.82      | 2       | 2.32E+08 | 0.002  | 6.51E-11 |
| chr2:2490:A | T           | A            | T           |              | -0.0186  | -0.00515  | 0.4274  | 0.602305 | 2        | 24907571 | 0.007067 | 0.47      | 2       | 25130440 | 0.002  | 6.58E-20 |
| chr2:3683:C | G           | C            | G           |              | -0.0144  | -0.00442  | 0.499   | 0.695245 | 2        | 36832414 | 0.007345 | 0.55      | 2       | 37059557 | 0.002  | 1.53E-12 |

|              |   |   |   |         |           |         |          |    |          |          |         |    |          |        |           |
|--------------|---|---|---|---------|-----------|---------|----------|----|----------|----------|---------|----|----------|--------|-----------|
| chr2:5907: A | C | A | C | 0.0124  | 0.015232  | 0.3797  | 0.355668 | 2  | 59071163 | 0.007063 | 0.031   | 2  | 59298298 | 0.002  | 1.13E-09  |
| chr2:6325: T | C | T | C | -0.026  | 0.004532  | 0.172   | 0.079011 | 2  | 632591   | 0.01284  | 0.72    | 2  | 632591   | 0.0026 | 9.06E-23  |
| chr2:7227: C | G | C | G | -0.0161 | 0.031829  | 0.1123  | 0.039625 | 2  | 72273556 | 0.017497 | 0.069   | 2  | 72500685 | 0.0029 | 1.63E-08  |
| chr21:390: A | C | A | C | -0.0344 | 0.007081  | 0.2694  | 0.169068 | 21 | 39093140 | 0.009051 | 0.43    | 21 | 40465066 | 0.0022 | 3.14E-53  |
| chr21:450: T | C | T | C | 0.0122  | -0.02258  | 0.3569  | 0.135447 | 21 | 45075080 | 0.00997  | 0.024   | 21 | 46494995 | 0.0021 | 1.16E-08  |
| chr22:410: T | C | T | C | -0.0195 | 0.001666  | 0.3529  | 0.412824 | 22 | 41013425 | 0.006859 | 0.81    | 22 | 41409429 | 0.0021 | 7.49E-20  |
| chr3:1709: A | G | A | G | 0.0196  | 0.002966  | 0.2883  | 0.246398 | 3  | 1.71E+08 | 0.007983 | 0.71    | 3  | 1.71E+08 | 0.0022 | 2.13E-18  |
| chr3:2532: A | G | A | G | 0.0113  | 0.010215  | 0.4105  | 0.146254 | 3  | 25321672 | 0.009694 | 0.29    | 3  | 25363163 | 0.002  | 2.87E-08  |
| chr3:3695: T | C | T | C | -0.0112 | 0.001469  | 0.4702  | 0.064842 | 3  | 36957264 | 0.013675 | 0.91    | 3  | 36998755 | 0.002  | 3.79E-08  |
| chr4:1480: C | G | C | G | -0.0138 | 0.002168  | 0.3807  | 0.831172 | 4  | 1.48E+08 | 0.008871 | 0.81    | 4  | 1.49E+08 | 0.0023 | 3.79E-09  |
| chr4:3876: T | C | T | C | 0.0137  | 0.027752  | 0.3181  | 0.991354 | 4  | 38764099 | 0.036294 | 0.44    | 4  | 38765720 | 0.0021 | 1.48E-10  |
| chr5:5689: T | C | T | C | -0.0188 | 0.00325   | 0.1561  | 0.396013 | 5  | 56898941 | 0.006895 | 0.64    | 5  | 56194768 | 0.0029 | 4.26E-11  |
| chr5:7368: A | G | A | G | 0.0158  | 0.010303  | 0.2922  | 0.82781  | 5  | 73683611 | 0.00905  | 0.25    | 5  | 72979436 | 0.0022 | 1.74E-12  |
| chr6:1265: T | C | T | C | -0.0279 | -0.00817  | 0.493   | 0.929155 | 6  | 1.27E+08 | 0.012646 | 0.52    | 6  | 1.27E+08 | 0.002  | 9.94E-43  |
| chr6:1300: C | G | C | G | -0.0224 | 0.000499  | 0.3211  | 0.168828 | 6  | 1.3E+08  | 0.009103 | 0.96    | 6  | 1.3E+08  | 0.0021 | 1.11E-25  |
| chr6:1339: T | C | T | C | 0.0116  | -0.0011   | 0.497   | 0.844621 | 6  | 1.34E+08 | 0.009368 | 0.91    | 6  | 1.34E+08 | 0.002  | 1.22E-08  |
| chr6:1496: A | G | A | G | -0.0119 | 0.005201  | 0.33    | 0.795869 | 6  | 1.5E+08  | 0.00818  | 0.52    | 6  | 1.5E+08  | 0.0021 | 2.61E-08  |
| chr6:1849: T | G | T | G | 0.0268  | 0.016796  | 0.4712  | 0.007685 | 6  | 18492119 | 0.03948  | 0.67    | 6  | 18492350 | 0.0047 | 1.05E-08  |
| chr6:3508: A | G | A | G | -0.0164 | 0.003553  | 0.159   | 0.886407 | 6  | 35082729 | 0.010942 | 0.75    | 6  | 35050506 | 0.0027 | 2.43E-09  |
| chr7:1022: A | C | A | C | 0.0144  | -3.54E-05 | 0.3867  | 0.098223 | 7  | 1.02E+08 | 0.011259 | 1       | 7  | 1.02E+08 | 0.002  | 1.53E-12  |
| chr7:1505: A | T | A | T | 0.0212  | 0.011968  | 0.2157  | 0.791787 | 7  | 1.51E+08 | 0.008453 | 0.16    | 7  | 1.5E+08  | 0.0024 | 4.10E-18  |
| chr8:1435: T | C | T | C | -0.0244 | -0.00345  | 0.2058  | 0.45365  | 8  | 1.44E+08 | 0.006948 | 0.62    | 8  | 1.45E+08 | 0.0025 | 9.14E-22  |
| chr8:7252: T | C | T | C | -0.0135 | 0.007523  | 0.2793  | 0.690202 | 8  | 72522921 | 0.007456 | 0.31    | 8  | 73435156 | 0.0022 | 1.67E-09  |
| chr8:9315: A | G | A | G | 0.0499  | -0.01415  | 0.4732  | 0.899856 | 8  | 9315699  | 0.010596 | 0.18    | 8  | 9173209  | 0.002  | 1.29E-132 |
| chr9:6845: A | C | A | C | 0.0344  | -0.00535  | 0.01789 | 0.322046 | 9  | 68454919 | 0.007302 | 0.46    | 9  | 71069835 | 0.006  | 1.02E-08  |
| rs1007821 A  | C | A | C | 0.0128  | -0.00898  | 0.2137  | 0.898175 | 5  | 1.14E+08 | 0.011246 | 0.42    | 5  | 1.13E+08 | 0.0023 | 4.60E-08  |
| rs1009593 T  | C | T | C | 0.0286  | -0.00943  | 0.4264  | 0.650096 | 8  | 1.16E+08 | 0.007013 | 0.18    | 8  | 1.17E+08 | 0.002  | 8.23E-45  |
| rs1010629 A  | G | A | G | 0.0151  | 0.004149  | 0.3539  | 0.204131 | 8  | 1.03E+08 | 0.008502 | 0.63    | 8  | 1.04E+08 | 0.0021 | 1.64E-12  |
| rs1049742 T  | G | T | G | -0.0134 | 0.001548  | 0.4294  | 0.6256   | 2  | 1.74E+08 | 0.006987 | 0.82    | 2  | 1.75E+08 | 0.002  | 4.68E-11  |
| rs1049824 A  | C | A | C | 0.0133  | 0.000842  | 0.4414  | 0.243516 | 2  | 2.3E+08  | 0.007985 | 0.92    | 2  | 2.31E+08 | 0.0021 | 4.96E-10  |
| rs1056441 T  | C | T | C | -0.0208 | -0.02383  | 0.2773  | 0.545149 | 20 | 63738996 | 0.006784 | 0.00044 | 20 | 62370349 | 0.0021 | 2.28E-22  |
| rs1076069 A  | G | A | G | -0.0172 | -0.00304  | 0.3847  | 0.668828 | 9  | 99519101 | 0.007211 | 0.67    | 9  | 1.02E+08 | 0.0021 | 8.65E-16  |
| rs1086408 A  | G | A | G | -0.016  | -0.00478  | 0.3072  | 0.518732 | 1  | 2.14E+08 | 0.006884 | 0.49    | 1  | 2.14E+08 | 0.0021 | 7.25E-14  |
| rs1087177 A  | G | A | G | -0.0196 | -0.00661  | 0.2465  | 0.817243 | 18 | 60184530 | 0.008801 | 0.45    | 18 | 57851763 | 0.0023 | 5.76E-17  |
| rs1092437 T  | C | T | C | -0.0147 | 0.011044  | 0.3678  | 0.880884 | 1  | 2.36E+08 | 0.010363 | 0.29    | 1  | 2.36E+08 | 0.0021 | 6.19E-12  |
| rs1096933 A  | C | A | C | -0.0112 | -0.01228  | 0.4503  | 0.444044 | 9  | 29717281 | 0.006849 | 0.073   | 9  | 29717279 | 0.002  | 3.79E-08  |
| rs1101273 A  | G | A | G | -0.0153 | 0.021946  | 0.3519  | 0.963737 | 10 | 21541175 | 0.016705 | 0.19    | 10 | 21830104 | 0.0021 | 8.31E-13  |
| rs1105440 T  | C | T | C | -0.012  | 0.005086  | 0.4612  | 0.186359 | 12 | 11638095 | 0.008587 | 0.55    | 12 | 11791029 | 0.002  | 3.79E-09  |
| rs1107859 T  | C | T | C | 0.0187  | -0.00162  | 0.169   | 0.799712 | 17 | 1715069  | 0.008475 | 0.85    | 17 | 1618363  | 0.0026 | 1.62E-12  |
| rs1111862 A  | G | A | G | 0.0194  | -0.01003  | 0.2604  | 0.911143 | 1  | 2.21E+08 | 0.012035 | 0.4     | 1  | 2.21E+08 | 0.0022 | 4.67E-18  |
| rs1115689 A  | T | A | T | -0.0163 | -0.00179  | 0.1819  | 0.217819 | 14 | 21223782 | 0.008389 | 0.83    | 14 | 21691941 | 0.0025 | 1.52E-10  |
| rs1120868 A  | T | A | T | 0.0974  | 0.009588  | 0.2078  | 0.263208 | 1  | 65604348 | 0.007155 | 0.18    | 1  | 66070031 | 0.0025 | 1.00E-200 |
| rs1121719 T  | G | T | G | 0.0134  | 0.00815   | 0.2962  | 0.498799 | 11 | 1.19E+08 | 0.006774 | 0.23    | 11 | 1.19E+08 | 0.0023 | 1.05E-08  |

|              |   |   |   |         |          |         |          |    |          |          |       |    |          |        |           |
|--------------|---|---|---|---------|----------|---------|----------|----|----------|----------|-------|----|----------|--------|-----------|
| rs1135855 T  | G | T | G | 0.0184  | 0.034491 | 0.1093  | 0.029779 | 7  | 44758716 | 0.019833 | 0.082 | 7  | 44798315 | 0.0031 | 1.70E-09  |
| rs1149471 T  | C | T | C | -0.0157 | 0.002056 | 0.161   | 0.90562  | 7  | 1.06E+08 | 0.011467 | 0.86  | 7  | 1.06E+08 | 0.0026 | 3.01E-09  |
| rs1162441 A  | G | A | G | 0.0138  | 0.012124 | 0.2594  | 0.411623 | 14 | 75270407 | 0.006696 | 0.082 | 14 | 75737110 | 0.0023 | 3.79E-09  |
| rs1165382 T  | C | T | C | 0.0199  | 0.007518 | 0.08648 | 0.255524 | 17 | 29325998 | 0.007762 | 0.33  | 17 | 27653016 | 0.0035 | 8.99E-09  |
| rs1166624 A  | G | A | G | -0.0419 | -0.02659 | 0.04573 | 0.010087 | 19 | 37739025 | 0.031565 | 0.4   | 19 | 38229926 | 0.0048 | 2.02E-18  |
| rs1166651 A  | C | A | G | 0.0298  | -0.00784 | 0.04076 | 0.056436 | 19 | 10777948 | 0.014782 | 0.6   | 19 | 11019581 | 0.0049 | 1.08E-09  |
| rs1170806 A  | G | A | G | -0.0129 | 0.010881 | 0.2913  | 0.973823 | 3  | 1.23E+08 | 0.019372 | 0.57  | 3  | 1.23E+08 | 0.0023 | 3.61E-08  |
| rs1177247 A  | G | A | G | -0.0273 | 0.005924 | 0.1561  | 0.363353 | 7  | 99583473 | 0.00714  | 0.41  | 7  | 99181096 | 0.0029 | 1.01E-21  |
| rs1178213 T  | G | T | G | 0.0123  | 0.001483 | 0.3419  | 0.254323 | 8  | 22594844 | 0.007846 | 0.85  | 8  | 22452357 | 0.0021 | 8.78E-09  |
| rs1179045 A  | G | A | G | -0.0198 | -0.03716 | 0.159   | 0.944525 | 9  | 1.01E+08 | 0.014586 | 0.011 | 9  | 1.04E+08 | 0.0027 | 5.90E-13  |
| rs1192879 A  | C | A | C | -0.0194 | -0.0193  | 0.1014  | 0.017531 | 3  | 33416001 | 0.023816 | 0.42  | 3  | 33457493 | 0.0033 | 2.61E-09  |
| rs1214049 T  | C | T | C | -0.0173 | -0.01713 | 0.2227  | 0.018012 | 1  | 2.22E+08 | 0.024453 | 0.48  | 1  | 2.22E+08 | 0.0024 | 1.44E-12  |
| rs1219181 T  | G | T | G | -0.0119 | 0.001311 | 0.2873  | 0.597262 | 6  | 1.36E+08 | 0.006991 | 0.85  | 6  | 1.36E+08 | 0.0021 | 2.61E-08  |
| rs12220 T    | C | T | C | -0.0151 | 0.01726  | 0.4533  | 0.550913 | 20 | 58715649 | 0.006824 | 0.011 | 20 | 57290705 | 0.002  | 1.21E-13  |
| rs1222209 A  | C | A | C | -0.0146 | -0.00815 | 0.33    | 0.891451 | 11 | 30340123 | 0.010741 | 0.45  | 11 | 30361670 | 0.0021 | 8.58E-12  |
| rs1223123 A  | G | A | G | -0.0279 | -0.00782 | 0.4076  | 0.255764 | 12 | 95463914 | 0.007825 | 0.32  | 12 | 95857690 | 0.002  | 9.94E-43  |
| rs1223904 T  | C | T | C | -0.0404 | -0.00398 | 0.3539  | 0.392411 | 1  | 2.47E+08 | 0.006966 | 0.57  | 1  | 2.48E+08 | 0.002  | 1.34E-87  |
| rs1227014 A  | G | A | G | 0.0139  | 0.003616 | 0.2038  | 0.572046 | 11 | 69348673 | 0.006767 | 0.59  | 11 | 69163441 | 0.0024 | 1.28E-08  |
| rs1242836 T  | C | T | C | -0.0142 | -0.0004  | 0.2296  | 0.644573 | 13 | 1.1E+08  | 0.007248 | 0.96  | 13 | 1.1E+08  | 0.0023 | 1.33E-09  |
| rs1251617 T  | C | T | C | -0.0151 | 0.016273 | 0.2863  | 0.78074  | 5  | 1.51E+08 | 0.008347 | 0.051 | 5  | 1.5E+08  | 0.0022 | 1.57E-11  |
| rs1260326 T  | C | T | C | 0.0758  | -0.00318 | 0.4105  | 0.461335 | 2  | 27508073 | 0.006816 | 0.64  | 2  | 27730940 | 0.002  | 1.00E-200 |
| rs1261375 A  | G | A | G | -0.0121 | -0.01097 | 0.3877  | 0.520653 | 2  | 2.28E+08 | 0.006829 | 0.11  | 2  | 2.29E+08 | 0.0021 | 1.52E-08  |
| rs1262194 C  | G | C | G | 0.0126  | 0.002094 | 0.2753  | 0.768252 | 2  | 66531780 | 0.008284 | 0.8   | 2  | 66758912 | 0.0022 | 1.85E-08  |
| rs1271697 A  | G | A | G | -0.0115 | 9.38E-05 | 0.4821  | 0.56172  | 16 | 29925333 | 0.00685  | 0.99  | 16 | 29936654 | 0.002  | 1.63E-08  |
| rs1292061 A  | G | A | G | -0.0209 | 0.003297 | 0.4324  | 0.587176 | 17 | 59833869 | 0.006869 | 0.63  | 17 | 57911230 | 0.002  | 1.03E-24  |
| rs1292717 A  | G | A | G | 0.0193  | -0.00246 | 0.3718  | 0.576369 | 16 | 27313700 | 0.006983 | 0.72  | 16 | 27325021 | 0.002  | 2.59E-21  |
| rs1292950 T  | C | T | C | 0.0161  | 0.008658 | 0.4245  | 0.868396 | 16 | 69531558 | 0.009975 | 0.39  | 16 | 69565461 | 0.002  | 2.65E-15  |
| rs1306668 A  | C | A | C | -0.0128 | -0.00827 | 0.4115  | 0.371518 | 3  | 94356182 | 0.007192 | 0.25  | 3  | 94075026 | 0.002  | 3.26E-10  |
| rs1329494 T  | G | T | G | 0.0137  | 7.02E-05 | 0.3797  | 0.402498 | 9  | 15852779 | 0.006841 | 0.99  | 9  | 15852777 | 0.0024 | 2.06E-08  |
| rs1332328 T  | C | T | C | 0.0265  | 0.009636 | 0.3598  | 0.372238 | 10 | 89251701 | 0.006999 | 0.17  | 10 | 91011458 | 0.0021 | 2.81E-35  |
| rs1337267 CT | C | G | A | 0.0146  | -0.013   | 0.3002  | 0.376081 | 13 | 85790261 | 0.006975 | 0.062 | 13 | 86367973 | 0.0025 | 9.70E-09  |
| rs1338071 C  | G | C | G | 0.0163  | -0.0081  | 0.2932  | 0.610231 | 6  | 1.53E+08 | 0.006991 | 0.25  | 6  | 1.53E+08 | 0.0022 | 3.41E-13  |
| rs1419361 A  | G | A | G | 0.0127  | 0.002224 | 0.339   | 0.652257 | 4  | 1.02E+08 | 0.007297 | 0.76  | 4  | 1.03E+08 | 0.0021 | 2.85E-09  |
| rs1464245 A  | G | A | G | 0.0159  | 0.004837 | 0.161   | 0.356628 | 14 | 35152187 | 0.007026 | 0.49  | 14 | 35621393 | 0.0027 | 7.30E-09  |
| rs1470560 A  | G | A | G | 0.0121  | 0.006225 | 0.338   | 0.170029 | 3  | 35628658 | 0.009014 | 0.49  | 3  | 35670150 | 0.0021 | 1.52E-08  |
| rs1635852 T  | C | T | C | 0.0141  | 0.010976 | 0.4811  | 0.773055 | 7  | 28149792 | 0.008127 | 0.18  | 7  | 28189411 | 0.002  | 4.38E-12  |
| rs1705027 A  | G | A | G | 0.0112  | 0.004958 | 0.4284  | 0.456052 | 2  | 1.21E+08 | 0.006764 | 0.46  | 2  | 1.21E+08 | 0.002  | 3.79E-08  |
| rs1705627 C  | G | C | G | -0.0228 | -0.02616 | 0.2724  | 0.929875 | 5  | 1.59E+08 | 0.013211 | 0.048 | 5  | 1.58E+08 | 0.0039 | 3.79E-09  |
| rs1709882 C  | G | C | G | -0.0129 | 0.008568 | 0.171   | 0.532901 | 12 | 63061567 | 0.006579 | 0.19  | 12 | 63455347 | 0.0023 | 3.61E-08  |
| rs1713847 A  | C | A | C | 0.0338  | 0.003851 | 0.1133  | 0.278338 | 17 | 37713312 | 0.007645 | 0.61  | 17 | 36073320 | 0.0032 | 9.23E-27  |
| rs1713852 T  | C | T | C | 0.0124  | -0.00218 | 0.3101  | 0.438521 | 7  | 1.16E+08 | 0.006869 | 0.75  | 7  | 1.16E+08 | 0.0022 | 3.10E-08  |
| rs1741725 A  | G | A | G | -0.015  | -0.00258 | 0.2823  | 0.59342  | 1  | 2.05E+08 | 0.006889 | 0.71  | 1  | 2.05E+08 | 0.0022 | 2.13E-11  |
| rs174373 T   | C | T | C | 0.0135  | -0.00274 | 0.2107  | 0.429635 | 6  | 1.12E+08 | 0.006912 | 0.69  | 6  | 1.12E+08 | 0.0024 | 3.30E-08  |



|             |   |   |   |         |          |         |          |    |          |          |       |    |          |        |           |
|-------------|---|---|---|---------|----------|---------|----------|----|----------|----------|-------|----|----------|--------|-----------|
| rs1761606 A | G | A | G | 0.1338  | -0.02146 | 0.07853 | 0.989193 | 16 | 51402971 | 0.033341 | 0.52  | 16 | 51436882 | 0.0044 | 1.00E-200 |
| rs1800693 T | C | T | C | 0.0218  | 0.010008 | 0.4254  | 0.861671 | 12 | 6330843  | 0.009817 | 0.31  | 12 | 6440009  | 0.002  | 9.56E-27  |
| rs1800961 T | C | T | C | -0.1074 | -0.00754 | 0.03678 | 0.01489  | 20 | 44413724 | 0.027641 | 0.78  | 20 | 43042364 | 0.0059 | 6.50E-74  |
| rs1880241 A | G | A | G | 0.0252  | 0.009847 | 0.4811  | 0.035062 | 7  | 22719850 | 0.016705 | 0.56  | 7  | 22759469 | 0.002  | 3.54E-35  |
| rs1886008 T | C | T | C | 0.0184  | 0.000465 | 0.1402  | 0.57805  | 20 | 62022567 | 0.006948 | 0.95  | 20 | 60597623 | 0.0033 | 1.63E-08  |
| rs1969066 A | G | A | G | 0.0133  | 0.004653 | 0.3082  | 0.456052 | 3  | 1.57E+08 | 0.006966 | 0.5   | 3  | 1.57E+08 | 0.0022 | 2.89E-09  |
| rs197419 A  | C | A | C | -0.0123 | 0.009997 | 0.4185  | 0.676273 | 1  | 1.12E+08 | 0.007276 | 0.17  | 1  | 1.12E+08 | 0.002  | 1.54E-09  |
| rs2156407 A | G | A | G | 0.0135  | 0.014785 | 0.2813  | 0.425312 | 21 | 36075413 | 0.006866 | 0.031 | 21 | 37447711 | 0.0022 | 1.67E-09  |
| rs2161037 A | G | A | G | 0.0205  | -0.00874 | 0.4672  | 0.610471 | 2  | 1.69E+08 | 0.007136 | 0.22  | 2  | 1.7E+08  | 0.002  | 7.70E-24  |
| rs2161374 T | C | T | C | -0.0191 | -0.00323 | 0.4781  | 0.336215 | 5  | 1.73E+08 | 0.007278 | 0.66  | 5  | 1.72E+08 | 0.002  | 6.60E-21  |
| rs2239222 A | G | A | G | -0.0359 | -0.00253 | 0.3539  | 0.589337 | 14 | 72545177 | 0.006968 | 0.72  | 14 | 73011885 | 0.0021 | 2.85E-63  |
| rs2261790 T | C | T | C | -0.0178 | -0.00037 | 0.4334  | 0.120797 | 20 | 25282153 | 0.009612 | 0.97  | 20 | 25262789 | 0.002  | 2.30E-18  |
| rs2274782 T | C | T | C | 0.012   | -0.00111 | 0.3002  | 0.302113 | 9  | 1.24E+08 | 0.007455 | 0.88  | 9  | 1.27E+08 | 0.0021 | 1.99E-08  |
| rs2280406 A | G | A | G | 0.0222  | 0.00774  | 0.4911  | 0.154179 | 3  | 49904003 | 0.009527 | 0.42  | 3  | 49941436 | 0.002  | 1.12E-27  |
| rs2289852 A | G | A | G | -0.0313 | 0.00342  | 0.06262 | 0.275696 | 5  | 1.57E+08 | 0.007625 | 0.65  | 5  | 1.57E+08 | 0.0044 | 8.72E-13  |
| rs2307377 A | G | A | G | -0.0221 | 0.006071 | 0.08847 | 0.89049  | 6  | 87657917 | 0.010755 | 0.57  | 6  | 88367635 | 0.0038 | 4.45E-09  |
| rs2429473 A | C | A | C | 0.0224  | 0.013715 | 0.1998  | 0.552354 | 12 | 46805116 | 0.006906 | 0.047 | 12 | 47198899 | 0.0025 | 1.36E-18  |
| rs245767 A  | G | A | G | -0.0145 | 0.008751 | 0.2734  | 0.123199 | 5  | 1.71E+08 | 0.010317 | 0.4   | 5  | 1.71E+08 | 0.0022 | 9.58E-11  |
| rs2596937 T | C | T | C | -0.0173 | 0.000511 | 0.1769  | 0.873679 | 3  | 9439222  | 0.010422 | 0.96  | 3  | 9480906  | 0.0024 | 1.44E-12  |
| rs2657896 T | C | T | C | -0.0233 | 0.00655  | 0.1789  | 0.157781 | 12 | 56535910 | 0.00948  | 0.49  | 12 | 56929694 | 0.0027 | 2.33E-17  |
| rs2700938 T | C | T | C | -0.0236 | -0.00937 | 0.3817  | 0.775696 | 7  | 36045532 | 0.00829  | 0.26  | 7  | 36085142 | 0.0021 | 2.51E-28  |
| rs2858259 A | G | A | G | 0.0157  | -0.0043  | 0.2137  | 0.068924 | 1  | 97960920 | 0.013531 | 0.75  | 1  | 98426476 | 0.0026 | 3.01E-09  |
| rs2860176 C | G | C | G | 0.0211  | 0.010458 | 0.4076  | 0.847502 | 8  | 1.25E+08 | 0.009505 | 0.27  | 8  | 1.27E+08 | 0.002  | 3.69E-25  |
| rs288183 T  | G | T | G | 0.0148  | 0.002447 | 0.167   | 0.65682  | 5  | 1.08E+08 | 0.007121 | 0.73  | 5  | 1.07E+08 | 0.0026 | 2.26E-08  |
| rs2926851 T | C | T | C | 0.0122  | 0.008484 | 0.4463  | 0.080452 | 5  | 1.54E+08 | 0.012393 | 0.49  | 5  | 1.53E+08 | 0.002  | 2.08E-09  |
| rs303429 T  | C | T | C | -0.0152 | -0.01589 | 0.4026  | 0.350865 | 10 | 30419512 | 0.007202 | 0.027 | 10 | 30708441 | 0.002  | 8.35E-14  |
| rs339969 A  | C | A | C | 0.0339  | 0.003982 | 0.3917  | 0.85975  | 15 | 60591082 | 0.009807 | 0.68  | 15 | 60883281 | 0.0021 | 1.29E-56  |
| rs3476152 T | C | T | C | -0.0179 | -0.00248 | 0.1909  | 0.355427 | 1  | 22354721 | 0.007127 | 0.73  | 1  | 22681214 | 0.0025 | 2.03E-12  |
| rs3486435 A | G | A | G | -0.0301 | 0.00059  | 0.05865 | 0.989914 | 14 | 58292562 | 0.033685 | 0.99  | 14 | 58759280 | 0.0046 | 5.04E-11  |
| rs3732356 T | G | T | G | -0.0235 | -0.0109  | 0.05765 | 0.884486 | 3  | 1.2E+08  | 0.010637 | 0.31  | 3  | 1.2E+08  | 0.0042 | 1.81E-08  |
| rs3768321 T | G | T | G | 0.0338  | -0.00335 | 0.1879  | 0.105187 | 1  | 39570256 | 0.011215 | 0.77  | 1  | 40035928 | 0.0025 | 3.06E-40  |
| rs3808348 T | C | T | C | -0.0224 | 0.005494 | 0.2147  | 0.275937 | 7  | 988812   | 0.007647 | 0.47  | 7  | 1028448  | 0.0025 | 1.36E-18  |
| rs3935032 T | C | T | C | -0.0153 | 0.005762 | 0.3579  | 0.089337 | 1  | 1628814  | 0.011835 | 0.63  | 1  | 1564194  | 0.0023 | 6.42E-11  |
| rs424539 C  | G | C | G | -0.012  | -0.00736 | 0.337   | 0.53194  | 9  | 14442597 | 0.006715 | 0.27  | 9  | 14442595 | 0.0021 | 1.99E-08  |
| rs4246598 A | C | A | C | 0.0134  | 0.006568 | 0.3897  | 0.2195   | 2  | 88138531 | 0.008276 | 0.43  | 2  | 88438050 | 0.002  | 4.68E-11  |
| rs4354188 T | C | T | C | 0.018   | -0.00784 | 0.2346  | 0.927233 | 6  | 1.16E+08 | 0.01282  | 0.54  | 6  | 1.16E+08 | 0.002  | 9.60E-19  |
| rs4418728 T | G | T | G | -0.0166 | 0.000331 | 0.4871  | 0.817483 | 10 | 93079967 | 0.008723 | 0.97  | 10 | 94839724 | 0.002  | 3.58E-16  |
| rs4468667 A | G | A | G | -0.0124 | -0.00654 | 0.3032  | 0.21902  | 17 | 67907513 | 0.007991 | 0.41  | 17 | 65903629 | 0.0022 | 3.10E-08  |
| rs4656241 T | C | T | C | -0.0884 | 0.022247 | 0.2416  | 0.975745 | 1  | 1.6E+08  | 0.021292 | 0.3   | 1  | 1.6E+08  | 0.0025 | 1.00E-200 |
| rs4658403 T | C | T | C | -0.0184 | 0.006757 | 0.1779  | 0.737752 | 1  | 2.44E+08 | 0.007604 | 0.37  | 1  | 2.44E+08 | 0.0026 | 3.63E-12  |
| rs4690098 T | C | T | C | 0.0167  | -0.00169 | 0.2346  | 0.427714 | 4  | 3445429  | 0.006864 | 0.81  | 4  | 3447156  | 0.0024 | 8.24E-12  |
| rs4704552 T | G | C | T | 0.0184  | 0.012717 | 0.338   | 0.420989 | 5  | 79284545 | 0.006961 | 0.068 | 5  | 78570219 | 0.0021 | 7.58E-18  |
| rs4714508 A | G | A | G | -0.0179 | 0.009143 | 0.3449  | 0.600624 | 6  | 41703939 | 0.00689  | 0.18  | 6  | 41671677 | 0.0021 | 5.67E-17  |

|             |   |   |   |         |          |         |          |    |          |          |       |    |          |        |           |
|-------------|---|---|---|---------|----------|---------|----------|----|----------|----------|-------|----|----------|--------|-----------|
| rs4755720 T | C | T | C | -0.0165 | -0.01105 | 0.3996  | 0.740634 | 11 | 43607199 | 0.007645 | 0.15  | 11 | 43628749 | 0.002  | 5.36E-16  |
| rs4764939 T | C | T | C | -0.0201 | -0.00307 | 0.494   | 0.801393 | 12 | 1.03E+08 | 0.008575 | 0.72  | 12 | 1.04E+08 | 0.002  | 5.56E-23  |
| rs4788095 T | C | T | C | -0.0166 | 0.018461 | 0.331   | 0.909462 | 16 | 28820038 | 0.011876 | 0.12  | 16 | 28831359 | 0.002  | 3.58E-16  |
| rs516316 C  | G | C | G | 0.0223  | 0.003176 | 0.4414  | 0.038665 | 19 | 48702888 | 0.017155 | 0.85  | 19 | 49206145 | 0.002  | 6.54E-28  |
| rs5585523 T | C | T | C | -0.027  | 0.000944 | 0.332   | 0.722863 | 18 | 57422483 | 0.007561 | 0.9   | 18 | 55089715 | 0.0021 | 1.48E-36  |
| rs5854292 T | C | T | C | 0.0356  | -0.00303 | 0.06759 | 0.069885 | 19 | 19268740 | 0.013267 | 0.82  | 19 | 19379549 | 0.0039 | 3.53E-20  |
| rs5942708 T | C | T | C | -0.0125 | 0.000623 | 0.4642  | 0.336936 | 18 | 26218893 | 0.007114 | 0.93  | 18 | 23798857 | 0.002  | 8.32E-10  |
| rs5973743 T | C | T | C | -0.015  | 0.005641 | 0.2386  | 0.511768 | 19 | 2671102  | 0.007027 | 0.42  | 19 | 2671100  | 0.0023 | 1.50E-10  |
| rs5991640 T | G | T | G | 0.0166  | -0.0167  | 0.336   | 0.657541 | 2  | 2.41E+08 | 0.007105 | 0.019 | 2  | 2.42E+08 | 0.0021 | 8.23E-15  |
| rs6003710 A | T | A | T | 0.0183  | 0.00725  | 0.3032  | 0.466378 | 16 | 88462228 | 0.006797 | 0.29  | 16 | 88528636 | 0.0022 | 3.08E-16  |
| rs6020459 T | C | T | C | -0.0178 | -0.00708 | 0.326   | 0.334774 | 20 | 50344009 | 0.007194 | 0.33  | 20 | 48960546 | 0.0022 | 1.91E-15  |
| rs6073958 T | C | T | C | 0.0279  | 0.011717 | 0.2207  | 0.865754 | 20 | 45923216 | 0.010095 | 0.25  | 20 | 44551855 | 0.0025 | 5.87E-28  |
| rs6201128 A | G | A | G | -0.0156 | 0.00647  | 0.3926  | 0.027137 | 15 | 63498926 | 0.019077 | 0.73  | 15 | 63791125 | 0.0021 | 2.96E-13  |
| rs6443429 A | C | A | C | 0.0134  | 0.009475 | 0.3022  | 0.259126 | 3  | 1.77E+08 | 0.007739 | 0.22  | 3  | 1.77E+08 | 0.0021 | 3.67E-10  |
| rs6486122 T | C | T | C | 0.0296  | 0.007754 | 0.2962  | 0.397935 | 11 | 13339977 | 0.006992 | 0.27  | 11 | 13361524 | 0.0021 | 1.38E-43  |
| rs6500446 A | G | A | G | 0.0114  | 0.011368 | 0.4175  | 0.052113 | 16 | 89782151 | 0.013928 | 0.41  | 16 | 89848559 | 0.002  | 2.16E-08  |
| rs6519133 T | C | T | C | 0.0313  | -0.00399 | 0.4046  | 0.539625 | 22 | 38700597 | 0.006898 | 0.56  | 22 | 39096602 | 0.0021 | 1.58E-48  |
| rs6595549 C | G | C | G | -0.0155 | -0.00631 | 0.1769  | 0.32757  | 5  | 1.25E+08 | 0.007132 | 0.38  | 5  | 1.24E+08 | 0.0026 | 4.76E-09  |
| rs663015 T  | C | T | C | -0.0167 | 0.001665 | 0.2823  | 0.690922 | 11 | 72787990 | 0.007436 | 0.82  | 11 | 72499035 | 0.0021 | 5.69E-15  |
| rs6734238 A | G | A | G | -0.0449 | 0.008379 | 0.4125  | 0.896013 | 2  | 1.13E+08 | 0.010904 | 0.44  | 2  | 1.14E+08 | 0.002  | 9.53E-108 |
| rs6775319 A | T | A | T | -0.0131 | 0.002133 | 0.2644  | 0.517051 | 3  | 18717009 | 0.006916 | 0.76  | 3  | 18758501 | 0.0022 | 4.96E-09  |
| rs6792725 A | G | A | G | 0.0185  | 0.006767 | 0.329   | 0.48439  | 3  | 24478792 | 0.006783 | 0.32  | 3  | 24520283 | 0.0022 | 1.47E-16  |
| rs6801781 A | G | A | G | 0.0129  | 0.008013 | 0.2783  | 0.910903 | 3  | 71583115 | 0.01142  | 0.48  | 3  | 71632266 | 0.0022 | 8.45E-09  |
| rs6808581 A | G | A | G | -0.0164 | -0.01443 | 0.2575  | 0.030019 | 17 | 49058513 | 0.019468 | 0.46  | 17 | 47135875 | 0.0022 | 2.45E-13  |
| rs687339 T  | C | T | C | -0.0249 | -0.00356 | 0.2296  | 0.865514 | 3  | 1.36E+08 | 0.00976  | 0.71  | 3  | 1.36E+08 | 0.0024 | 2.19E-24  |
| rs6925389 A | G | A | G | -0.0149 | 0.014837 | 0.3777  | 0.958453 | 6  | 7112586  | 0.016226 | 0.36  | 6  | 7112819  | 0.0021 | 3.20E-12  |
| rs704017 A  | G | A | G | 0.016   | 0.001389 | 0.4384  | 0.708694 | 10 | 79059375 | 0.007416 | 0.85  | 10 | 80819132 | 0.002  | 3.92E-15  |
| rs7084062 A | G | A | G | -0.0133 | 0.003617 | 0.3439  | 0.42171  | 10 | 1.32E+08 | 0.006909 | 0.6   | 10 | 1.34E+08 | 0.0021 | 4.96E-10  |
| rs7103411 T | C | T | C | 0.0216  | 0.004957 | 0.4085  | 0.512248 | 11 | 27678578 | 0.006907 | 0.47  | 11 | 27700125 | 0.0024 | 9.60E-19  |
| rs7127808 A | T | A | T | -0.0206 | 0.009406 | 0.1909  | 0.674832 | 11 | 66164448 | 0.007328 | 0.2   | 11 | 65931919 | 0.0026 | 7.14E-15  |
| rs7269439 T | G | T | G | -0.0179 | 0.012757 | 0.4891  | 0.091018 | 14 | 24404987 | 0.011629 | 0.27  | 14 | 24874193 | 0.002  | 1.49E-18  |
| rs7271255 A | G | A | G | -0.012  | 0.003176 | 0.4115  | 0.268732 | 4  | 1.4E+08  | 0.007692 | 0.68  | 4  | 1.41E+08 | 0.0021 | 1.99E-08  |
| rs7279949 A | G | A | G | 0.0166  | 0.018678 | 0.1451  | 0.130884 | 5  | 1.33E+08 | 0.010248 | 0.068 | 5  | 1.32E+08 | 0.0027 | 1.55E-09  |
| rs7313714 A | G | A | G | 0.0186  | -0.00787 | 0.168   | 0.957733 | 7  | 74659260 | 0.016941 | 0.64  | 7  | 74073590 | 0.0026 | 2.12E-12  |
| rs7357754 A | G | A | G | -0.0177 | 0.003421 | 0.4841  | 0.73367  | 9  | 89592393 | 0.007829 | 0.66  | 9  | 92207308 | 0.002  | 3.55E-18  |
| rs7367251 T | G | T | G | -0.0175 | 0.002933 | 0.1412  | 0.101345 | 9  | 1.3E+08  | 0.011473 | 0.8   | 9  | 1.33E+08 | 0.0031 | 1.01E-08  |
| rs7455288 T | C | T | C | 0.0143  | 0.006064 | 0.2256  | 0.767291 | 7  | 6376984  | 0.00798  | 0.45  | 7  | 6416615  | 0.0023 | 1.02E-09  |
| rs7490497 A | C | A | C | -0.019  | -0.00534 | 0.09443 | 0.305956 | 4  | 88128874 | 0.007441 | 0.47  | 4  | 89050026 | 0.0033 | 5.49E-09  |
| rs7522990 T | C | T | C | 0.0372  | -0.00421 | 0.1143  | 0.902257 | 7  | 73481616 | 0.011306 | 0.71  | 7  | 72895946 | 0.0031 | 4.02E-34  |
| rs7526511 C | G | C | G | -0.0182 | -0.02305 | 0.1551  | 0.989193 | 2  | 1.65E+08 | 0.031936 | 0.47  | 2  | 1.66E+08 | 0.0031 | 2.54E-09  |
| rs7539332 T | C | G | C | 0.0333  | -0.00921 | 0.1541  | 0.034342 | 11 | 47244920 | 0.018117 | 0.61  | 11 | 47245389 | 0.0027 | 8.94E-34  |
| rs7639927 A | T | A | T | -0.0134 | -0.02059 | 0.4771  | 0.209174 | 3  | 4721050  | 0.008411 | 0.014 | 3  | 4762734  | 0.002  | 4.68E-11  |
| rs7662058 A | G | A | G | 0.019   | 0.00301  | 0.08946 | 0.931556 | 13 | 1.03E+08 | 0.013672 | 0.83  | 13 | 1.03E+08 | 0.0035 | 4.05E-08  |

|             |    |   |   |         |           |         |          |    |          |          |       |    |          |        |          |
|-------------|----|---|---|---------|-----------|---------|----------|----|----------|----------|-------|----|----------|--------|----------|
| rs7662792 A | T  | A | T | -0.0166 | -5.41E-05 | 0.3191  | 0.459894 | 4  | 45119856 | 0.006852 | 0.99  | 4  | 45121873 | 0.0021 | 8.23E-15 |
| rs7684939 A | AC | T | C | -0.0134 | 0.008148  | 0.05865 | 0.322526 | 4  | 54643022 | 0.007192 | 0.26  | 4  | 55508495 | 0.0023 | 1.05E-08 |
| rs7770473 T | C  | T | C | 0.0483  | 0.003965  | 0.02883 | 0.992555 | 5  | 52785075 | 0.04011  | 0.92  | 5  | 52080909 | 0.0052 | 1.38E-20 |
| rs7773862 T | C  | T | C | -0.0588 | -0.02225  | 0.01093 | 0.012008 | 12 | 1.01E+08 | 0.031682 | 0.48  | 12 | 1.01E+08 | 0.0099 | 2.62E-09 |
| rs7801838 T | C  | T | C | -0.0128 | 0.014949  | 0.3101  | 0.100144 | 7  | 1.29E+08 | 0.011228 | 0.18  | 7  | 1.29E+08 | 0.0022 | 1.10E-08 |
| rs7842899 T | C  | T | C | -0.0203 | -0.00219  | 0.3936  | 0.686359 | 9  | 1.36E+08 | 0.007415 | 0.77  | 9  | 1.39E+08 | 0.002  | 2.08E-23 |
| rs787488 A  | G  | A | G | 0.0136  | -0.00666  | 0.2873  | 0.901777 | 1  | 67622756 | 0.011144 | 0.55  | 1  | 68088439 | 0.0022 | 1.27E-09 |
| rs7908825 C | G  | C | G | -0.0133 | 0.003833  | 0.3678  | 0.884726 | 10 | 73794783 | 0.010467 | 0.71  | 10 | 75554541 | 0.002  | 6.51E-11 |
| rs7933202 A | C  | A | C | 0.021   | 0.002837  | 0.4652  | 0.901057 | 11 | 60169453 | 0.010585 | 0.79  | 11 | 59936926 | 0.002  | 6.16E-25 |
| rs7956514 T | G  | T | G | -0.0151 | 0.002326  | 0.2545  | 0.560038 | 12 | 12726320 | 0.006873 | 0.74  | 12 | 12879254 | 0.0022 | 1.57E-11 |
| rs7993752 A | C  | A | C | -0.0134 | 0.000535  | 0.4791  | 0.487272 | 13 | 41999844 | 0.007046 | 0.94  | 13 | 42573980 | 0.002  | 4.68E-11 |
| rs8072566 A | G  | A | G | -0.0204 | 0.001814  | 0.2058  | 0.35951  | 17 | 42324345 | 0.00714  | 0.8   | 17 | 40476363 | 0.0025 | 1.11E-15 |
| rs878664 A  | C  | A | G | -0.014  | -0.07394  | 0.2753  | 0.005283 | 18 | 62447188 | 0.047428 | 0.12  | 18 | 60203855 | 0.0022 | 4.10E-10 |
| rs9200655 T | C  | T | C | -0.0239 | -0.00163  | 0.3678  | 0.630403 | 9  | 1.33E+08 | 0.007032 | 0.82  | 9  | 1.36E+08 | 0.0021 | 5.21E-29 |
| rs930035 A  | G  | A | G | -0.0133 | -0.00998  | 0.4722  | 0.675793 | 2  | 1.71E+08 | 0.007245 | 0.17  | 2  | 1.72E+08 | 0.002  | 6.51E-11 |
| rs9604045 T | G  | T | G | -0.0229 | 0.018881  | 0.2565  | 0.199087 | 13 | 1.13E+08 | 0.008795 | 0.032 | 13 | 1.14E+08 | 0.0027 | 8.06E-17 |
| rs9634098 C | G  | T | C | -0.0522 | 0.047421  | 0.04573 | 0.009846 | 12 | 24053144 | 0.034925 | 0.17  | 12 | 24195042 | 0.0054 | 3.90E-22 |
| rs9738365 A | C  | A | C | 0.0212  | 0.016801  | 0.3072  | 0.175072 | 12 | 31844701 | 0.00904  | 0.063 | 12 | 31997635 | 0.0023 | 1.39E-19 |
| rs9788721 T | C  | T | C | -0.0121 | -0.00127  | 0.3598  | 0.696686 | 15 | 78510527 | 0.007407 | 0.86  | 15 | 78802869 | 0.0021 | 1.52E-08 |
| rs991946 T  | C  | T | C | 0.0112  | 0.00134   | 0.4125  | 0.310038 | 6  | 1.66E+08 | 0.007419 | 0.86  | 6  | 1.66E+08 | 0.002  | 3.79E-08 |
| rs994596 T  | C  | T | C | 0.0137  | -0.00823  | 0.4344  | 0.301153 | 4  | 18458205 | 0.007509 | 0.27  | 4  | 18459828 | 0.0021 | 1.48E-10 |
| rs9965184 A | T  | A | T | 0.0118  | 0.006552  | 0.329   | 0.570605 | 18 | 43196641 | 0.006836 | 0.34  | 18 | 40776606 | 0.0021 | 3.41E-08 |

Supplementary Table 2L. List of SNPs for Total White Cell Count and their effects on TEWL

| SNP        | effect_alle | other_allele | effect_alle | other_allele | beta.TWC | beta.TEWL | eaf.TWC  | eaf.TEWL | chr.TEWL | pos.TEWL | se.TEWL  | pval.TEWL | chr.TWC | pos.TWC  | se.TWC   | pval.TWC  |
|------------|-------------|--------------|-------------|--------------|----------|-----------|----------|----------|----------|----------|----------|-----------|---------|----------|----------|-----------|
| chr1:10124 | G           | C            | T           | C            | -0.14688 | 0.026492  | 0.003596 | 0.010807 | 1        | 1.01E+08 | 0.033362 | 0.43      | 1       | 1.01E+08 | 0.014471 | 3.56E-24  |
| chr1:1459  | C           | T            | C           | T            | 0.003395 | -0.00986  | 0.780415 | 0.67195  | 1        | 1.46E+08 | 0.007304 | 0.18      | 1       | 1.46E+08 | 0.002193 | 0.121638  |
| chr1:1696  | A           | C            | A           | C            | 0.000917 | -0.00451  | 0.219085 | 0.012728 | 1        | 1.7E+08  | 0.030213 | 0.88      | 1       | 1.7E+08  | 0.002098 | 0.662104  |
| chr1:1740  | A           | G            | A           | G            | -0.01554 | -0.01363  | 0.247801 | 0.567723 | 1        | 1.74E+08 | 0.006706 | 0.042     | 1       | 1.74E+08 | 0.001959 | 2.25E-15  |
| chr1:1821  | G           | C            | G           | C            | 0.014336 | 0.000686  | 0.310047 | 0.24976  | 1        | 1.82E+08 | 0.007859 | 0.93      | 1       | 1.82E+08 | 0.001742 | 1.95E-16  |
| chr1:1985  | A           | C            | A           | C            | -0.03471 | 0.006662  | 0.094648 | 0.130644 | 1        | 1.99E+08 | 0.010164 | 0.51      | 1       | 1.99E+08 | 0.002814 | 6.63E-35  |
| chr1:2036  | G           | C            | G           | C            | -0.02552 | 0.017649  | 0.89393  | 0.982229 | 1        | 2.04E+08 | 0.025177 | 0.48      | 1       | 2.04E+08 | 0.003063 | 8.39E-17  |
| chr1:2790  | T           | C            | T           | C            | -0.01557 | -0.00353  | 0.388104 | 0.512248 | 1        | 27908488 | 0.006951 | 0.61      | 1       | 27908488 | 0.00165  | 4.14E-21  |
| chr1:3992  | T           | C            | T           | C            | 0.013596 | 0.007953  | 0.259492 | 0.035303 | 1        | 39926080 | 0.01793  | 0.66      | 1       | 39926080 | 0.002044 | 3.02E-11  |
| chr1:4585  | G           | T            | G           | T            | -0.0154  | -0.00703  | 0.476458 | 0.608309 | 1        | 45858493 | 0.006951 | 0.31      | 1       | 45858493 | 0.001687 | 7.39E-20  |
| chr1:9358  | G           | T            | G           | C            | 0.015559 | 0.026688  | 0.202849 | 0.005764 | 1        | 93585354 | 0.045455 | 0.56      | 1       | 93585354 | 0.002226 | 2.88E-12  |
| chr10:135  | C           | A            | C           | A            | 0.013457 | 0.011663  | 0.513009 | 0.324928 | 10       | 13502285 | 0.007289 | 0.11      | 10      | 13502285 | 0.001651 | 3.79E-16  |
| chr10:678  | G           | A            | G           | A            | 0.014029 | 0.014619  | 0.56575  | 0.180596 | 10       | 67874444 | 0.008718 | 0.094     | 10      | 67874444 | 0.001771 | 2.49E-15  |
| chr10:747  | T           | C            | T           | C            | -0.01474 | -0.00143  | 0.769722 | 0.826369 | 10       | 74730578 | 0.008964 | 0.87      | 10      | 74730578 | 0.001917 | 1.51E-14  |
| chr10:777  | T           | C            | T           | C            | 0.011211 | -0.00562  | 0.385489 | 0.43732  | 10       | 77792334 | 0.006982 | 0.42      | 10      | 77792334 | 0.001667 | 1.80E-11  |
| chr10:942  | C           | G            | C           | G            | -0.01874 | 0.001952  | 0.442832 | 0.540106 | 10       | 94279840 | 0.00688  | 0.78      | 10      | 94279840 | 0.001618 | 5.67E-31  |
| chr11:114  | A           | T            | A           | T            | 0.027012 | -0.01237  | 0.296945 | 0.291787 | 11       | 1.14E+08 | 0.007565 | 0.1       | 11      | 1.14E+08 | 0.001772 | 2.03E-52  |
| chr11:116  | T           | C            | T           | C            | 0.016408 | -0.00582  | 0.766848 | 0.407061 | 11       | 1.17E+08 | 0.006935 | 0.4       | 11      | 1.17E+08 | 0.002196 | 8.28E-14  |
| chr11:128  | A           | G            | A           | G            | -0.02531 | -0.00836  | 0.289159 | 0.184678 | 11       | 1.28E+08 | 0.00888  | 0.35      | 11      | 1.28E+08 | 0.001804 | 1.07E-44  |
| chr11:308  | C           | T            | C           | T            | 0.043503 | -0.01147  | 0.521522 | 0.925552 | 11       | 308314   | 0.012474 | 0.36      | 11      | 308314   | 0.002047 | 4.03E-100 |
| chr11:618  | G           | C            | G           | C            | -0.0196  | -0.00254  | 0.327978 | 0.571326 | 11       | 61803876 | 0.006565 | 0.7       | 11      | 61803876 | 0.00173  | 1.02E-29  |
| chr11:696  | T           | G            | T           | G            | -0.01592 | 0.01057   | 0.67551  | 0.836455 | 11       | 69685018 | 0.009263 | 0.25      | 11      | 69685018 | 0.001803 | 1.13E-18  |
| chr11:880  | T           | C            | T           | C            | -0.01719 | -0.00495  | 0.660818 | 0.370077 | 11       | 8801946  | 0.007059 | 0.48      | 11      | 8801946  | 0.001773 | 3.36E-22  |
| chr12:111  | C           | T            | C           | T            | -0.06635 | 0.008637  | 0.624937 | 0.987032 | 12       | 1.11E+08 | 0.028479 | 0.76      | 12      | 1.11E+08 | 0.001815 | 1.00E-200 |
| chr12:121  | T           | A            | T           | A            | -0.0182  | -0.00386  | 0.833149 | 0.954371 | 12       | 1.22E+08 | 0.016207 | 0.81      | 12      | 1.22E+08 | 0.002211 | 1.98E-16  |
| chr12:127  | C           | T            | C           | T            | 0.019285 | -0.00035  | 0.30502  | 0.429875 | 12       | 12725831 | 0.006898 | 0.96      | 12      | 12725831 | 0.001768 | 1.17E-27  |
| chr12:204  | C           | G            | C           | G            | -0.01619 | 0.006074  | 0.168602 | 0.076129 | 12       | 20426458 | 0.012942 | 0.64      | 12      | 20426458 | 0.002183 | 1.24E-13  |
| chr12:478  | C           | T            | C           | T            | -0.01284 | 0.012101  | 0.608851 | 0.454371 | 12       | 47808263 | 0.006805 | 0.075     | 12      | 47808263 | 0.001761 | 3.20E-13  |
| chr12:501  | G           | T            | G           | T            | 0.01371  | 0.007914  | 0.416027 | 0.558598 | 12       | 50184922 | 0.006865 | 0.25      | 12      | 50184922 | 0.001687 | 4.64E-16  |
| chr12:519  | T           | C            | T           | C            | 0.022569 | -0.00871  | 0.786583 | 0.852065 | 12       | 51912002 | 0.009598 | 0.36      | 12      | 51912002 | 0.00201  | 3.26E-29  |
| chr12:572  | T           | C            | T           | C            | -0.01457 | -0.01414  | 0.201016 | 0.082133 | 12       | 57298687 | 0.012459 | 0.26      | 12      | 57298687 | 0.002027 | 6.89E-13  |
| chr12:681  | A           | G            | A           | G            | 0.011624 | -4.35E-05 | 0.668577 | 0.742555 | 12       | 68149460 | 0.007612 | 1         | 12      | 68149460 | 0.001741 | 2.52E-11  |
| chr13:113  | A           | T            | A           | T            | 0.020044 | 0.009002  | 0.299899 | 0.388569 | 13       | 1.14E+08 | 0.007057 | 0.2       | 13      | 1.14E+08 | 0.001761 | 5.72E-30  |
| chr13:517  | C           | G            | C           | G            | -0.01605 | -0.0015   | 0.173799 | 0.151537 | 13       | 51771501 | 0.009385 | 0.87      | 13      | 51771501 | 0.002151 | 8.93E-14  |
| chr14:103  | C           | G            | C           | G            | 0.017372 | -0.00229  | 0.623231 | 0.400096 | 14       | 1.03E+08 | 0.006959 | 0.74      | 14      | 1.03E+08 | 0.001776 | 1.48E-22  |
| chr14:812  | C           | G            | C           | G            | -0.01296 | -0.01233  | 0.543932 | 0.402978 | 14       | 81202363 | 0.006995 | 0.078     | 14      | 81202363 | 0.001615 | 1.06E-15  |
| chr14:926  | C           | G            | C           | G            | -0.03061 | -0.00653  | 0.176954 | 0.016811 | 14       | 92631994 | 0.026517 | 0.81      | 14      | 92631994 | 0.002358 | 1.76E-38  |
| chr15:419  | T           | C            | T           | C            | -0.0402  | -0.00179  | 0.115502 | 0.085735 | 15       | 41936843 | 0.011983 | 0.88      | 15      | 41936843 | 0.00255  | 6.22E-56  |
| chr15:770  | C           | T            | C           | T            | -0.01386 | 0.004199  | 0.284938 | 0.194765 | 15       | 77013944 | 0.008493 | 0.62      | 15      | 77013944 | 0.001808 | 1.90E-14  |
| chr16:304  | C           | G            | C           | G            | 0.037905 | 0.025498  | 0.605975 | 0.897695 | 16       | 30474072 | 0.011365 | 0.025     | 16      | 30474072 | 0.001807 | 1.10E-97  |
| chr16:887  | G           | C            | G           | C            | -0.0169  | -0.00293  | 0.592978 | 0.636647 | 16       | 88795935 | 0.007203 | 0.68      | 16      | 88795935 | 0.001767 | 1.20E-21  |

|             |   |   |   |          |           |          |          |    |          |          |         |    |          |          |           |
|-------------|---|---|---|----------|-----------|----------|----------|----|----------|----------|---------|----|----------|----------|-----------|
| chr17:162:C | G | C | G | 0.024816 | -0.01469  | 0.623539 | 0.913064 | 17 | 16237935 | 0.012024 | 0.22    | 17 | 16237935 | 0.001839 | 1.81E-41  |
| chr17:297:C | T | C | T | -0.0212  | 0.009993  | 0.489511 | 0.311239 | 17 | 29738261 | 0.007415 | 0.18    | 17 | 29738261 | 0.001717 | 5.90E-35  |
| chr17:399:G | T | G | T | 0.071473 | -0.00918  | 0.478787 | 0.54707  | 17 | 39968377 | 0.006957 | 0.19    | 17 | 39968377 | 0.001713 | 1.00E-200 |
| chr17:481:T | A | T | A | 0.016084 | 0.003442  | 0.239827 | 0.299232 | 17 | 48131431 | 0.007384 | 0.64    | 17 | 48131431 | 0.001895 | 2.26E-17  |
| chr17:542:A | G | A | G | 0.020133 | 0.017438  | 0.593963 | 0.955572 | 17 | 5422842  | 0.016745 | 0.3     | 17 | 5422842  | 0.001805 | 7.63E-29  |
| chr17:733:T | C | T | C | -0.02527 | 0.003637  | 0.197914 | 0.07805  | 17 | 7337072  | 0.012945 | 0.78    | 17 | 7337072  | 0.002185 | 6.49E-31  |
| chr17:746:T | C | T | C | 0.021501 | -0.01024  | 0.72912  | 0.553554 | 17 | 74699072 | 0.006903 | 0.14    | 17 | 74699072 | 0.001924 | 5.86E-29  |
| chr17:764:C | G | C | G | -0.01499 | 0.007812  | 0.400289 | 0.262968 | 17 | 76402433 | 0.007732 | 0.31    | 17 | 76402433 | 0.001716 | 2.51E-18  |
| chr18:488:A | G | C | G | 0.021461 | -0.02819  | 0.112308 | 0.010327 | 18 | 48806551 | 0.033345 | 0.4     | 18 | 48806551 | 0.002866 | 7.27E-14  |
| chr19:102:G | T | G | T | -0.02504 | 0.003856  | 0.665226 | 0.420269 | 19 | 10280935 | 0.006766 | 0.57    | 19 | 10280935 | 0.001873 | 1.04E-40  |
| chr19:138:G | T | G | T | 0.019702 | 0.01747   | 0.350708 | 0.282901 | 19 | 13837583 | 0.007558 | 0.021   | 19 | 13837583 | 0.001733 | 6.34E-30  |
| chr19:143:C | G | C | G | 0.065963 | -0.00608  | 0.018477 | 0.013209 | 19 | 14388802 | 0.03024  | 0.84    | 19 | 14388802 | 0.007483 | 1.26E-18  |
| chr19:163:C | A | C | A | -0.039   | -0.00235  | 0.762745 | 0.613593 | 19 | 16384963 | 0.007045 | 0.74    | 19 | 16384963 | 0.001946 | 2.55E-89  |
| chr19:394:A | G | A | G | -0.01191 | -0.00526  | 0.49863  | 0.527618 | 19 | 39456187 | 0.006928 | 0.45    | 19 | 39456187 | 0.00161  | 1.43E-13  |
| chr19:512:T | C | T | C | -0.02471 | 0.000255  | 0.290492 | 0.182757 | 19 | 51225221 | 0.008829 | 0.98    | 19 | 51225221 | 0.001782 | 1.04E-43  |
| chr2:1271:A | G | A | G | 0.027625 | 0.023837  | 0.064416 | 0.057397 | 2  | 1.27E+08 | 0.014546 | 0.1     | 2  | 1.27E+08 | 0.00336  | 2.11E-16  |
| chr2:1598:G | A | G | A | -0.03132 | -0.00542  | 0.845951 | 0.896494 | 2  | 1.6E+08  | 0.011217 | 0.63    | 2  | 1.6E+08  | 0.002234 | 1.31E-44  |
| chr2:1814:T | G | T | G | 0.033947 | -0.00278  | 0.517669 | 0.386647 | 2  | 1.81E+08 | 0.007013 | 0.69    | 2  | 1.81E+08 | 0.001629 | 2.06E-96  |
| chr2:2317:A | G | A | G | -0.02104 | -0.00318  | 0.211117 | 0.191162 | 2  | 2.32E+08 | 0.008589 | 0.71    | 2  | 2.32E+08 | 0.002047 | 9.32E-25  |
| chr2:8531:T | C | A | C | -0.01427 | -0.01026  | 0.584702 | 0.120797 | 2  | 85313657 | 0.010347 | 0.32    | 2  | 85313657 | 0.001839 | 8.96E-15  |
| chr20:406:C | G | C | G | 0.02227  | 0.006195  | 0.594701 | 0.432277 | 20 | 40630638 | 0.006879 | 0.37    | 20 | 40630638 | 0.001664 | 8.24E-41  |
| chr20:637:G | A | G | A | 0.01205  | 0.025577  | 0.612218 | 0.433477 | 20 | 63706054 | 0.006812 | 0.00017 | 20 | 63706054 | 0.001728 | 3.22E-12  |
| chr22:199:T | G | T | G | 0.017901 | -0.00408  | 0.327066 | 0.264409 | 22 | 19983024 | 0.007675 | 0.59    | 22 | 19983024 | 0.001782 | 1.03E-23  |
| chr22:391:C | G | C | G | -0.01932 | -0.01522  | 0.3895   | 0.231988 | 22 | 39136415 | 0.008218 | 0.064   | 22 | 39136415 | 0.0017   | 7.16E-30  |
| chr3:1369:T | A | T | A | 0.014428 | 0.001892  | 0.659532 | 0.841739 | 3  | 1.37E+08 | 0.00937  | 0.84    | 3  | 1.37E+08 | 0.001735 | 9.65E-17  |
| chr3:1512:A | C | A | C | 0.018836 | -0.01208  | 0.832934 | 0.845581 | 3  | 1.51E+08 | 0.009469 | 0.2     | 3  | 1.51E+08 | 0.002162 | 3.16E-18  |
| chr3:1840:C | T | C | T | 0.014659 | -0.00449  | 0.622358 | 0.82757  | 3  | 1.84E+08 | 0.008902 | 0.61    | 3  | 1.84E+08 | 0.001729 | 2.39E-17  |
| chr3:1872:G | A | G | A | 0.016437 | -0.02054  | 0.174075 | 0.129683 | 3  | 18722783 | 0.010279 | 0.046   | 3  | 18722783 | 0.002144 | 1.86E-14  |
| chr3:7144:T | C | T | C | 0.014255 | -0.02444  | 0.593955 | 0.090058 | 3  | 71449831 | 0.011507 | 0.034   | 3  | 71449831 | 0.002016 | 1.59E-12  |
| chr4:3103:A | G | A | G | -0.01402 | 0.003668  | 0.357323 | 0.410183 | 4  | 3103473  | 0.006975 | 0.6     | 4  | 3103473  | 0.001685 | 9.11E-17  |
| chr4:5454:T | A | T | A | 0.025668 | 0.005499  | 0.269486 | 0.350144 | 4  | 54542708 | 0.00726  | 0.45    | 4  | 54542708 | 0.001856 | 1.81E-43  |
| chr4:6968:G | A | G | A | -0.01767 | 0.004655  | 0.375444 | 0.270653 | 4  | 6968192  | 0.007727 | 0.55    | 4  | 6968192  | 0.001667 | 3.14E-26  |
| chr4:7175:T | G | T | G | -0.02655 | 0.00314   | 0.281416 | 0.260086 | 4  | 71752606 | 0.007673 | 0.68    | 4  | 71752606 | 0.001787 | 6.59E-50  |
| chr4:8892:C | T | C | T | 0.012076 | 0.00467   | 0.742801 | 0.541306 | 4  | 88927432 | 0.006902 | 0.5     | 4  | 88927432 | 0.001872 | 1.16E-10  |
| chr5:1154:G | T | G | T | -0.01755 | -0.00321  | 0.876036 | 0.835735 | 5  | 1.15E+08 | 0.009086 | 0.72    | 5  | 1.15E+08 | 0.002448 | 8.01E-13  |
| chr5:1227:T | C | T | C | 0.011133 | -0.0086   | 0.566955 | 0.631604 | 5  | 1.23E+08 | 0.006971 | 0.22    | 5  | 1.23E+08 | 0.001702 | 6.32E-11  |
| chr5:1285:A | C | A | C | 0.02938  | -6.94E-06 | 0.326633 | 0.396494 | 5  | 1285859  | 0.006994 | 1       | 5  | 1285859  | 0.001862 | 4.84E-56  |
| chr5:5801:A | G | A | G | -0.01802 | 0.009654  | 0.174992 | 0.105908 | 5  | 58019808 | 0.01113  | 0.39    | 5  | 58019808 | 0.002136 | 3.52E-17  |
| chr6:1224:G | A | G | A | 0.018824 | -0.00164  | 0.546455 | 0.458934 | 6  | 1.22E+08 | 0.006829 | 0.81    | 6  | 1.22E+08 | 0.001612 | 1.78E-31  |
| chr6:1367:T | C | T | C | 0.015465 | 0.003077  | 0.425862 | 0.504563 | 6  | 1.37E+08 | 0.006801 | 0.65    | 6  | 1.37E+08 | 0.001639 | 4.25E-21  |
| chr6:3667:C | A | C | A | 0.016089 | 0.000153  | 0.432065 | 0.349183 | 6  | 36670914 | 0.007075 | 0.98    | 6  | 36670914 | 0.001677 | 8.86E-22  |
| chr7:1050:C | G | C | G | 0.014501 | 0.001057  | 0.231881 | 0.502882 | 7  | 1.05E+08 | 0.006761 | 0.88    | 7  | 1.05E+08 | 0.00222  | 6.73E-11  |
| chr7:1300:T | C | T | C | 0.016954 | -0.00906  | 0.301138 | 0.066042 | 7  | 1.3E+08  | 0.013509 | 0.5     | 7  | 1.3E+08  | 0.001862 | 9.34E-20  |

|             |   |   |   |          |          |          |          |    |          |          |      |    |          |          |           |
|-------------|---|---|---|----------|----------|----------|----------|----|----------|----------|------|----|----------|----------|-----------|
| chr7:1397 G | A | G | A | -0.01198 | -0.00665 | 0.707979 | 0.579971 | 7  | 13979617 | 0.006911 | 0.34 | 7  | 13979617 | 0.00178  | 1.80E-11  |
| chr7:1491 T | C | T | C | -0.01435 | 7.85E-05 | 0.702687 | 0.887608 | 7  | 1.49E+08 | 0.010766 | 0.99 | 7  | 1.49E+08 | 0.001823 | 3.71E-15  |
| chr7:1816 C | T | C | T | -0.01351 | -0.01204 | 0.221979 | 0.253362 | 7  | 18164395 | 0.007766 | 0.12 | 7  | 18164395 | 0.001936 | 3.05E-12  |
| chr7:2354 T | C | T | C | 0.014103 | -0.01199 | 0.213816 | 0.036023 | 7  | 23547541 | 0.016646 | 0.47 | 7  | 23547541 | 0.002019 | 2.95E-12  |
| chr7:2716 A | C | A | C | -0.02322 | -0.0053  | 0.082454 | 0.164505 | 7  | 27165113 | 0.009207 | 0.56 | 7  | 27165113 | 0.002996 | 9.64E-15  |
| chr7:4807 C | T | C | T | -0.01052 | -0.00153 | 0.433122 | 0.486551 | 7  | 48077226 | 0.006847 | 0.82 | 7  | 48077226 | 0.001622 | 9.34E-11  |
| chr7:9954 A | C | A | C | -0.02181 | -0.01314 | 0.080172 | 0.009366 | 7  | 99540251 | 0.034888 | 0.71 | 7  | 99540251 | 0.00303  | 6.43E-13  |
| chr8:1265 T | C | T | C | 0.01867  | -0.00677 | 0.12922  | 0.288665 | 8  | 1.27E+08 | 0.007485 | 0.37 | 8  | 1.27E+08 | 0.002501 | 6.62E-14  |
| chr8:1280 T | C | T | C | 0.017845 | -0.00387 | 0.505807 | 0.565562 | 8  | 1.28E+08 | 0.006832 | 0.57 | 8  | 1.28E+08 | 0.001654 | 4.31E-27  |
| chr8:1296 T | C | T | C | -0.03731 | 0.00104  | 0.578197 | 0.371037 | 8  | 1.3E+08  | 0.007061 | 0.88 | 8  | 1.3E+08  | 0.001712 | 2.92E-105 |
| chr9:1111 G | A | G | A | -0.02465 | 0.003413 | 0.412105 | 0.165466 | 9  | 1.11E+08 | 0.009352 | 0.72 | 9  | 1.11E+08 | 0.001698 | 1.02E-47  |
| chr9:1209 A | G | A | G | 0.011151 | -0.00684 | 0.538442 | 0.520173 | 9  | 1.21E+08 | 0.00681  | 0.32 | 9  | 1.21E+08 | 0.00163  | 8.20E-12  |
| chr9:4039 T | G | T | G | -0.01307 | 0.013542 | 0.645549 | 0.79659  | 9  | 4039727  | 0.008512 | 0.11 | 9  | 4039727  | 0.001709 | 2.15E-14  |
| chr9:8892 C | T | C | T | -0.01741 | 0.011075 | 0.572279 | 0.650576 | 9  | 88920798 | 0.007265 | 0.13 | 9  | 88920798 | 0.001637 | 2.14E-26  |
| chr9:9273 A | C | A | C | 0.017827 | -0.00045 | 0.259563 | 0.70389  | 9  | 92732165 | 0.007173 | 0.95 | 9  | 92732165 | 0.001988 | 3.18E-19  |
| rs1005006 C | A | C | A | -0.01274 | 0.012235 | 0.413689 | 0.285783 | 4  | 80000216 | 0.007622 | 0.11 | 4  | 80000216 | 0.001665 | 2.02E-14  |
| rs1005807 A | G | A | G | -0.03311 | -0.04512 | 0.362436 | 0.011287 | 5  | 1.32E+08 | 0.031335 | 0.15 | 5  | 1.32E+08 | 0.001821 | 7.54E-74  |
| rs1012116 A | G | A | G | -0.01382 | 0.00458  | 0.7005   | 0.674592 | 9  | 1.13E+08 | 0.007295 | 0.53 | 9  | 1.13E+08 | 0.00178  | 8.66E-15  |
| rs1012551 T | C | T | C | -0.01204 | -0.00609 | 0.460924 | 0.460615 | 9  | 38197082 | 0.006915 | 0.38 | 9  | 38197082 | 0.001622 | 1.19E-13  |
| rs1014696 C | T | C | T | -0.01239 | -0.00375 | 0.436149 | 0.607589 | 14 | 1.01E+08 | 0.006992 | 0.59 | 14 | 1.01E+08 | 0.001749 | 1.47E-12  |
| rs1019312 C | G | C | G | 0.014524 | 0.010959 | 0.453915 | 0.244717 | 2  | 2.01E+08 | 0.007995 | 0.17 | 2  | 2.01E+08 | 0.001682 | 6.12E-18  |
| rs1025687 C | T | C | T | -0.01994 | 0.008473 | 0.62446  | 0.628002 | 18 | 50621423 | 0.007101 | 0.23 | 18 | 50621423 | 0.001669 | 7.44E-33  |
| rs1042286 T | C | T | C | -0.01432 | -0.00011 | 0.626555 | 0.424111 | 19 | 33403940 | 0.006775 | 0.99 | 19 | 33403940 | 0.001713 | 6.75E-17  |
| rs1043106 T | G | T | G | 0.016202 | 0.004057 | 0.429197 | 0.43828  | 11 | 1.08E+08 | 0.006791 | 0.55 | 11 | 1.08E+08 | 0.001626 | 2.36E-23  |
| rs1045242 G | A | G | A | -0.01977 | -0.00732 | 0.245596 | 0.157541 | 5  | 1.19E+08 | 0.009311 | 0.43 | 5  | 1.19E+08 | 0.001887 | 1.20E-25  |
| rs1047891 A | C | A | C | -0.01973 | -0.00569 | 0.282512 | 0.165946 | 2  | 2.11E+08 | 0.009281 | 0.54 | 2  | 2.11E+08 | 0.001818 | 2.03E-27  |
| rs1050991 A | T | A | T | -0.02061 | 0.001932 | 0.168296 | 0.308117 | 10 | 1.1E+08  | 0.007368 | 0.79 | 10 | 1.1E+08  | 0.002191 | 5.44E-21  |
| rs1051762 T | C | T | C | -0.01126 | -0.00471 | 0.244402 | 0.20317  | 4  | 1.56E+08 | 0.008685 | 0.59 | 4  | 1.56E+08 | 0.001904 | 3.49E-09  |
| rs1074960 A | G | A | G | 0.017602 | -0.01006 | 0.807023 | 0.858549 | 10 | 80489996 | 0.009726 | 0.3  | 10 | 80489996 | 0.00204  | 6.69E-18  |
| rs1075728 T | A | T | A | -0.03163 | 0.007482 | 0.248405 | 0.579011 | 9  | 22143571 | 0.006729 | 0.27 | 9  | 22143571 | 0.002027 | 8.06E-55  |
| rs1078632 G | C | G | C | 0.039541 | 0.009482 | 0.603099 | 0.682037 | 10 | 97308981 | 0.007281 | 0.19 | 10 | 97308981 | 0.001648 | 3.67E-127 |
| rs1080633 A | T | A | T | 0.012971 | -0.00323 | 0.443108 | 0.536744 | 6  | 85729611 | 0.006743 | 0.63 | 6  | 85729611 | 0.001677 | 1.10E-14  |
| rs1082872 T | G | T | G | -0.04863 | 0.002415 | 0.287684 | 0.044669 | 10 | 24929314 | 0.016524 | 0.88 | 10 | 24929314 | 0.001861 | 1.80E-150 |
| rs1083173 A | G | A | G | 0.016267 | 0.002741 | 0.678861 | 0.630644 | 11 | 12114765 | 0.007135 | 0.7  | 11 | 12114765 | 0.001766 | 3.44E-20  |
| rs1086436 C | T | C | T | 0.020594 | -0.01726 | 0.570129 | 0.848223 | 1  | 8858254  | 0.008815 | 0.05 | 1  | 8858254  | 0.001703 | 1.30E-33  |
| rs1088957 A | G | A | G | -0.03901 | -0.00965 | 0.455637 | 0.787464 | 1  | 65683658 | 0.007711 | 0.21 | 1  | 65683658 | 0.001806 | 2.13E-103 |
| rs1093547 T | G | T | G | 0.01307  | -0.0015  | 0.449586 | 0.444284 | 3  | 98698056 | 0.006985 | 0.83 | 3  | 98698056 | 0.001627 | 1.01E-15  |
| rs1093658 A | G | A | G | -0.0111  | 0.01174  | 0.656136 | 0.738232 | 3  | 1.7E+08  | 0.007714 | 0.13 | 3  | 1.7E+08  | 0.001696 | 6.09E-11  |
| rs1094803 A | C | A | C | 0.020635 | -0.00153 | 0.190908 | 0.154899 | 6  | 42542567 | 0.009531 | 0.87 | 6  | 42542567 | 0.002057 | 1.16E-23  |
| rs1095199 C | T | C | T | 0.019729 | -0.00612 | 0.487741 | 0.620317 | 7  | 6719307  | 0.007075 | 0.39 | 7  | 6719307  | 0.001779 | 1.57E-28  |
| rs109536 C  | G | C | G | 0.016144 | 0.00519  | 0.337819 | 0.630644 | 9  | 1.34E+08 | 0.007222 | 0.47 | 9  | 1.34E+08 | 0.001838 | 1.68E-18  |
| rs1099547 C | T | C | T | -0.0257  | -0.00912 | 0.467959 | 0.301393 | 10 | 63250912 | 0.007321 | 0.21 | 10 | 63250912 | 0.001617 | 7.68E-57  |
| rs1102713 C | A | C | A | -0.00163 | -0.00051 | 0.426687 | 0.331172 | 1  | 1.73E+08 | 0.00712  | 0.94 | 1  | 1.73E+08 | 0.001697 | 0.337047  |

|           |   |   |   |          |          |          |          |    |          |          |       |    |          |          |           |
|-----------|---|---|---|----------|----------|----------|----------|----|----------|----------|-------|----|----------|----------|-----------|
| rs1104252 | A | G | G | -0.01157 | 0.001353 | 0.492945 | 0.422911 | 11 | 9880564  | 0.007112 | 0.85  | 11 | 9880564  | 0.001625 | 1.11E-12  |
| rs1104842 | G | C | G | 0.011895 | 0.012613 | 0.477652 | 0.391451 | 12 | 26187053 | 0.007014 | 0.072 | 12 | 26187053 | 0.001621 | 2.26E-13  |
| rs1105287 | G | A | G | 0.023737 | -0.00153 | 0.365734 | 0.389289 | 12 | 9753094  | 0.006997 | 0.83  | 12 | 9753094  | 0.001673 | 1.18E-45  |
| rs1110081 | T | C | T | 0.018143 | -0.00529 | 0.432863 | 0.416907 | 4  | 1.44E+08 | 0.006961 | 0.45  | 4  | 1.44E+08 | 0.00166  | 8.97E-28  |
| rs1110487 | T | C | T | -0.02177 | 0.00281  | 0.668701 | 0.802113 | 12 | 88435517 | 0.008483 | 0.74  | 12 | 88435517 | 0.001782 | 2.81E-34  |
| rs1124009 | A | G | A | 0.000209 | -0.00983 | 0.796311 | 0.662344 | 1  | 1.48E+08 | 0.007394 | 0.18  | 1  | 1.48E+08 | 0.002296 | 0.927404  |
| rs1125007 | G | A | G | 0.020425 | -0.01171 | 0.479336 | 0.096542 | 8  | 10790313 | 0.010752 | 0.28  | 8  | 10790313 | 0.001745 | 1.28E-31  |
| rs1135704 | A | G | A | -0.01805 | -0.00487 | 0.200343 | 0.254083 | 7  | 76025659 | 0.008    | 0.54  | 7  | 76025659 | 0.002104 | 1.01E-17  |
| rs1148947 | T | C | T | -0.04628 | -0.00357 | 0.031526 | 0.014649 | 10 | 88017202 | 0.02876  | 0.9   | 10 | 88017202 | 0.00463  | 1.70E-23  |
| rs1158619 | C | T | C | -0.02554 | 0.052561 | 0.192388 | 0.013689 | 1  | 2.08E+08 | 0.028247 | 0.063 | 1  | 2.08E+08 | 0.002093 | 3.23E-34  |
| rs1160232 | G | T | G | 0.030765 | 0.002581 | 0.113921 | 0.097743 | 11 | 1.23E+08 | 0.011604 | 0.82  | 11 | 1.23E+08 | 0.00255  | 1.75E-33  |
| rs1163825 | C | T | C | 0.017243 | -0.00329 | 0.129433 | 0.15586  | 15 | 58480608 | 0.009397 | 0.73  | 15 | 58480608 | 0.002433 | 1.43E-12  |
| rs1164412 | T | C | T | -0.01621 | -0.00325 | 0.505864 | 0.200528 | 16 | 57025062 | 0.008367 | 0.7   | 16 | 57025062 | 0.001724 | 5.92E-21  |
| rs1164628 | T | C | T | -0.01673 | 0.015144 | 0.368288 | 0.39001  | 16 | 3669343  | 0.006895 | 0.028 | 16 | 3669343  | 0.001722 | 2.87E-22  |
| rs1164913 | T | C | T | -0.01902 | -0.0087  | 0.130817 | 0.049952 | 1  | 26846193 | 0.015524 | 0.58  | 1  | 26846193 | 0.002415 | 3.49E-15  |
| rs1165641 | G | A | G | 0.013816 | 0.001596 | 0.564421 | 0.525456 | 17 | 45260603 | 0.006771 | 0.81  | 17 | 45260603 | 0.001631 | 2.61E-17  |
| rs1167071 | A | C | A | -0.0144  | 0.013702 | 0.298241 | 0.088617 | 19 | 11808063 | 0.011875 | 0.25  | 19 | 11808063 | 0.001833 | 4.11E-15  |
| rs1168830 | T | C | T | 0.020983 | 0.009388 | 0.122939 | 0.18732  | 2  | 1.28E+08 | 0.008683 | 0.28  | 2  | 1.28E+08 | 0.002513 | 7.15E-17  |
| rs1168989 | T | C | T | -0.02705 | 0.007185 | 0.072261 | 0.20341  | 2  | 70128819 | 0.008473 | 0.4   | 2  | 70128819 | 0.003288 | 2.03E-16  |
| rs1172570 | G | A | G | 0.058085 | -0.00269 | 0.379726 | 0.504563 | 4  | 74094279 | 0.006774 | 0.69  | 4  | 74094279 | 0.001664 | 1.00E-200 |
| rs1180355 | A | G | A | 7.60E-05 | 0.008447 | 0.404899 | 0.555716 | 1  | 1.18E+08 | 0.006957 | 0.22  | 1  | 1.18E+08 | 0.001699 | 0.964267  |
| rs1181210 | A | G | A | -0.03855 | -0.02545 | 0.039746 | 0.009846 | 17 | 57385975 | 0.034091 | 0.46  | 17 | 57385975 | 0.004141 | 1.38E-20  |
| rs1182182 | T | C | T | 0.017111 | -0.00715 | 0.282124 | 0.20293  | 7  | 2833600  | 0.008671 | 0.41  | 7  | 2833600  | 0.00179  | 1.25E-21  |
| rs1188720 | G | T | G | -0.02104 | 0.004111 | 0.627144 | 0.638569 | 2  | 61547338 | 0.007155 | 0.57  | 2  | 61547338 | 0.001663 | 1.16E-36  |
| rs1196051 | G | A | G | 0.019768 | -0.0032  | 0.226192 | 0.096542 | 5  | 35883139 | 0.011572 | 0.78  | 5  | 35883139 | 0.001947 | 3.52E-24  |
| rs1196064 | C | A | C | -0.01661 | 0.000395 | 0.621366 | 0.745677 | 5  | 1.49E+08 | 0.007698 | 0.96  | 5  | 1.49E+08 | 0.001791 | 1.86E-20  |
| rs1197477 | G | T | G | 0.018542 | 0.001556 | 0.111518 | 0.323967 | 7  | 80583740 | 0.007356 | 0.83  | 7  | 80583740 | 0.002724 | 1.04E-11  |
| rs1206287 | G | T | G | 0.019572 | 0.009027 | 0.185431 | 0.069164 | 1  | 2.24E+08 | 0.013703 | 0.51  | 1  | 2.24E+08 | 0.002116 | 2.36E-20  |
| rs1220359 | T | C | T | 0.022541 | -0.01488 | 0.200408 | 0.01489  | 6  | 396321   | 0.028085 | 0.6   | 6  | 396321   | 0.002335 | 5.01E-22  |
| rs1227995 | T | C | T | 0.024074 | 0.001449 | 0.656352 | 0.669308 | 11 | 47938658 | 0.007295 | 0.84  | 11 | 47938658 | 0.001705 | 3.36E-45  |
| rs1228038 | C | T | C | 0.022897 | -0.03475 | 0.063872 | 0.024496 | 11 | 1.22E+08 | 0.021826 | 0.11  | 11 | 1.22E+08 | 0.003346 | 8.08E-12  |
| rs1237806 | T | C | T | -0.0158  | -0.00182 | 0.573011 | 0.382565 | 9  | 1.24E+08 | 0.00698  | 0.79  | 9  | 1.24E+08 | 0.001713 | 3.18E-20  |
| rs1245035 | A | C | A | 0.012359 | -0.00295 | 0.549187 | 0.32781  | 12 | 64582269 | 0.00734  | 0.69  | 12 | 64582269 | 0.001695 | 3.15E-13  |
| rs1254030 | T | C | T | -0.02867 | 0.000856 | 0.093536 | 0.142651 | 7  | 66197780 | 0.009779 | 0.93  | 7  | 66197780 | 0.003016 | 2.14E-21  |
| rs1255061 | A | G | A | -0.02954 | 0.004466 | 0.815735 | 0.805716 | 8  | 23109256 | 0.008786 | 0.61  | 8  | 23109256 | 0.002116 | 2.95E-44  |
| rs1260326 | C | T | C | -0.03131 | 0.003182 | 0.575362 | 0.538665 | 2  | 27508073 | 0.006816 | 0.64  | 2  | 27508073 | 0.001644 | 8.68E-81  |
| rs1269170 | T | G | T | -0.01206 | 0.003028 | 0.748598 | 0.845581 | 2  | 1.45E+08 | 0.009614 | 0.75  | 2  | 1.45E+08 | 0.001862 | 9.80E-11  |
| rs1271056 | G | A | G | 0.013297 | -0.00307 | 0.21021  | 0.251681 | 22 | 37633716 | 0.008013 | 0.7   | 22 | 37633716 | 0.002103 | 2.64E-10  |
| rs1275153 | G | A | G | -0.01873 | -0.00561 | 0.144329 | 0.260327 | 1  | 40891108 | 0.007824 | 0.47  | 1  | 40891108 | 0.002339 | 1.22E-15  |
| rs1276379 | C | T | C | 0.016144 | -0.01102 | 0.473507 | 0.361191 | 10 | 1.02E+08 | 0.007114 | 0.12  | 10 | 1.02E+08 | 0.001654 | 1.79E-22  |
| rs1279246 | G | C | G | 0.015364 | 0.005697 | 0.235611 | 0.173391 | 11 | 18054892 | 0.009221 | 0.54  | 11 | 18054892 | 0.00192  | 1.26E-15  |
| rs1285879 | C | T | C | 0.025035 | -0.00063 | 0.607445 | 0.124159 | 6  | 7137130  | 0.010097 | 0.95  | 6  | 7137130  | 0.002009 | 1.27E-35  |
| rs1292254 | C | T | C | 0.013471 | -0.00265 | 0.680733 | 0.645773 | 16 | 50045479 | 0.007082 | 0.71  | 16 | 50045479 | 0.001744 | 1.19E-14  |

|           |   |   |   |          |          |          |          |    |          |          |       |    |          |          |           |
|-----------|---|---|---|----------|----------|----------|----------|----|----------|----------|-------|----|----------|----------|-----------|
| rs1292995 | A | G | G | -0.03005 | -0.02568 | 0.074569 | 0.009126 | 16 | 2094893  | 0.036229 | 0.48  | 16 | 2094893  | 0.003578 | 4.74E-17  |
| rs1293085 | G | A | G | 0.015442 | -0.00452 | 0.458787 | 0.208453 | 16 | 81568607 | 0.008291 | 0.59  | 16 | 81568607 | 0.001692 | 7.42E-20  |
| rs1294135 | G | A | G | -0.01661 | 0.008668 | 0.463769 | 0.101345 | 17 | 17813217 | 0.011203 | 0.44  | 17 | 17813217 | 0.001846 | 2.44E-19  |
| rs1301326 | T | C | T | 0.022612 | -0.01221 | 0.075778 | 0.070845 | 2  | 1.92E+08 | 0.01339  | 0.36  | 2  | 1.92E+08 | 0.00307  | 1.85E-13  |
| rs1303374 | T | G | T | -0.01653 | 0.006213 | 0.619078 | 0.435639 | 2  | 66433271 | 0.006723 | 0.36  | 2  | 66433271 | 0.001731 | 1.37E-21  |
| rs1306357 | A | T | A | 0.027327 | -0.00179 | 0.401584 | 0.307637 | 3  | 47046347 | 0.007486 | 0.81  | 3  | 47046347 | 0.001805 | 9.44E-52  |
| rs1315623 | G | T | G | -0.01167 | -0.00098 | 0.66371  | 0.480307 | 5  | 55634423 | 0.006819 | 0.89  | 5  | 55634423 | 0.00201  | 6.55E-09  |
| rs1318072 | A | G | A | -0.01847 | -0.00193 | 0.789384 | 0.769452 | 5  | 1.8E+08  | 0.008099 | 0.81  | 5  | 1.8E+08  | 0.002035 | 1.21E-19  |
| rs1320717 | T | C | T | -0.02066 | 0.003738 | 0.135984 | 0.168108 | 6  | 41198081 | 0.009107 | 0.68  | 6  | 41198081 | 0.002435 | 2.30E-17  |
| rs1322599 | T | C | T | -0.02778 | 0.000673 | 0.266935 | 0.598463 | 6  | 16758194 | 0.00678  | 0.92  | 6  | 16758194 | 0.00203  | 1.34E-42  |
| rs1328328 | G | C | G | -0.02319 | 0.001076 | 0.130574 | 0.084774 | 9  | 1.29E+08 | 0.012318 | 0.93  | 9  | 1.29E+08 | 0.002511 | 2.75E-20  |
| rs1329166 | G | A | G | 0.025828 | 0.037578 | 0.180746 | 0.017531 | 9  | 282738   | 0.024433 | 0.12  | 9  | 282738   | 0.002335 | 2.06E-28  |
| rs1358980 | T | C | T | 0.014867 | 0.014474 | 0.490836 | 0.585014 | 6  | 43796814 | 0.006844 | 0.034 | 6  | 43796814 | 0.00166  | 3.51E-19  |
| rs1366045 | C | T | C | -0.02356 | -0.01096 | 0.427321 | 0.658501 | 3  | 42867558 | 0.007362 | 0.14  | 3  | 42867558 | 0.001649 | 2.90E-46  |
| rs1366689 | C | T | C | 0.014961 | 0.003045 | 0.193292 | 0.333093 | 4  | 1.47E+08 | 0.007307 | 0.68  | 4  | 1.47E+08 | 0.002092 | 8.99E-13  |
| rs138918  | A | G | A | 0.014738 | 0.005681 | 0.29934  | 0.028098 | 22 | 43163445 | 0.019277 | 0.77  | 22 | 43163445 | 0.001937 | 2.86E-14  |
| rs1412444 | T | C | T | 0.018435 | 0.011747 | 0.321679 | 0.347022 | 10 | 89243170 | 0.007105 | 0.098 | 10 | 89243170 | 0.001729 | 1.62E-26  |
| rs1434077 | C | G | C | -0.01369 | -0.00822 | 0.209788 | 0.089337 | 4  | 78719704 | 0.011483 | 0.47  | 4  | 78719704 | 0.002024 | 1.40E-11  |
| rs1446707 | G | A | G | 0.395514 | -0.00805 | 0.997167 | 0.008405 | 2  | 2.18E+08 | 0.03774  | 0.83  | 2  | 2.18E+08 | 0.017605 | 1.05E-111 |
| rs1456055 | T | C | T | -0.05219 | -0.00853 | 0.254829 | 0.044909 | 19 | 45239644 | 0.015978 | 0.59  | 19 | 45239644 | 0.002065 | 7.86E-141 |
| rs1456896 | T | C | T | 0.015801 | -0.00242 | 0.637986 | 0.411623 | 7  | 50264865 | 0.006613 | 0.71  | 7  | 50264865 | 0.001688 | 8.49E-21  |
| rs1468102 | G | C | G | 0.011468 | -0.0123  | 0.376468 | 0.648655 | 11 | 2983296  | 0.007175 | 0.086 | 11 | 2983296  | 0.001748 | 5.57E-11  |
| rs1533299 | T | C | T | 0.011253 | -0.0042  | 0.384855 | 0.447887 | 2  | 1.11E+08 | 0.00679  | 0.54  | 2  | 1.11E+08 | 0.001711 | 5.04E-11  |
| rs1536760 | T | C | T | 0.015182 | -0.01042 | 0.402967 | 0.663064 | 13 | 1.14E+08 | 0.007173 | 0.15  | 13 | 1.14E+08 | 0.001813 | 5.78E-17  |
| rs1539009 | T | C | T | -0.01236 | 0.007506 | 0.634095 | 0.824207 | 1  | 2.14E+08 | 0.008955 | 0.4   | 1  | 2.14E+08 | 0.001712 | 5.41E-13  |
| rs1693037 | C | T | C | 0.01552  | 0.012584 | 0.168441 | 0.086455 | 12 | 3278531  | 0.0123   | 0.31  | 12 | 3278531  | 0.002197 | 1.67E-12  |
| rs1700589 | A | G | A | -0.04393 | 5.10E-05 | 0.211959 | 0.336455 | 4  | 82626709 | 0.007295 | 0.99  | 4  | 82626709 | 0.001999 | 5.53E-107 |
| rs1704143 | C | A | C | 0.034578 | -0.00092 | 0.05961  | 0.083814 | 12 | 1.01E+08 | 0.012534 | 0.94  | 12 | 1.01E+08 | 0.003438 | 9.23E-24  |
| rs1710014 | G | A | G | 0.015728 | 0.004746 | 0.178957 | 0.157301 | 5  | 1.43E+08 | 0.009524 | 0.62  | 5  | 1.43E+08 | 0.002136 | 1.85E-13  |
| rs1738074 | C | T | C | -0.01958 | 0.007922 | 0.50973  | 0.48439  | 6  | 1.59E+08 | 0.006633 | 0.23  | 6  | 1.59E+08 | 0.001642 | 9.39E-33  |
| rs1738668 | G | T | G | 0.019768 | -0.02127 | 0.152276 | 0.061239 | 14 | 35132881 | 0.013903 | 0.13  | 14 | 35132881 | 0.002261 | 2.38E-18  |
| rs1770596 | G | A | G | -0.01999 | -0.02722 | 0.193134 | 0.011768 | 2  | 1.87E+08 | 0.030178 | 0.37  | 2  | 1.87E+08 | 0.002309 | 5.20E-18  |
| rs1771000 | A | G | A | 0.021027 | 0.011888 | 0.164636 | 0.082373 | 6  | 1.53E+08 | 0.01248  | 0.34  | 6  | 1.53E+08 | 0.002171 | 3.78E-22  |
| rs1800961 | T | C | T | -0.034   | -0.00754 | 0.026449 | 0.01489  | 20 | 44413724 | 0.027641 | 0.78  | 20 | 44413724 | 0.005016 | 1.25E-11  |
| rs180942  | G | T | G | -0.01222 | -0.00852 | 0.581572 | 0.488713 | 10 | 1.14E+08 | 0.006802 | 0.21  | 10 | 1.14E+08 | 0.001668 | 2.45E-13  |
| rs1863176 | C | G | C | 0.015695 | -0.00592 | 0.552717 | 0.818924 | 2  | 12790966 | 0.008661 | 0.49  | 2  | 12790966 | 0.001649 | 1.87E-21  |
| rs1883587 | A | G | A | -0.03195 | 0.088895 | 0.071663 | 0.005043 | 12 | 1.2E+08  | 0.048578 | 0.067 | 12 | 1.2E+08  | 0.003499 | 7.11E-20  |
| rs1894401 | A | G | A | -0.0157  | -0.00376 | 0.587311 | 0.816042 | 15 | 90885812 | 0.008629 | 0.66  | 15 | 90885812 | 0.001746 | 2.55E-19  |
| rs1926168 | T | C | T | 0.199981 | -0.04495 | 0.005104 | 0.021854 | 11 | 1.18E+08 | 0.022703 | 0.048 | 11 | 1.18E+08 | 0.01373  | 5.19E-48  |
| rs1929863 | T | C | T | -0.01771 | 0.012623 | 0.392805 | 0.177474 | 1  | 2.27E+08 | 0.008886 | 0.16  | 1  | 2.27E+08 | 0.00178  | 2.73E-23  |
| rs1933295 | G | A | G | -0.01541 | -0.01397 | 0.800867 | 0.910663 | 1  | 61641349 | 0.011515 | 0.22  | 1  | 61641349 | 0.002124 | 4.27E-13  |
| rs1985157 | C | T | C | 0.014651 | -0.00947 | 0.377911 | 0.182277 | 19 | 18402784 | 0.00877  | 0.28  | 19 | 18402784 | 0.001761 | 9.46E-17  |
| rs2012011 | A | G | A | -0.02518 | 0.006737 | 0.135421 | 0.159702 | 6  | 46925618 | 0.009414 | 0.47  | 6  | 46925618 | 0.002354 | 1.14E-26  |



|           |   |   |   |   |          |          |          |          |    |          |          |       |    |          |          |           |
|-----------|---|---|---|---|----------|----------|----------|----------|----|----------|----------|-------|----|----------|----------|-----------|
| rs2038700 | C | T | C | T | 0.034194 | -0.00916 | 0.421037 | 0.450528 | 14 | 24992783 | 0.006918 | 0.19  | 14 | 24992783 | 0.00165  | 2.52E-95  |
| rs205438  | T | C | T | C | 0.013686 | -0.01215 | 0.707266 | 0.683958 | 16 | 28082353 | 0.007323 | 0.097 | 16 | 28082353 | 0.001837 | 9.79E-14  |
| rs2062250 | A | G | A | G | 0.043089 | -0.016   | 0.92808  | 0.908982 | 15 | 64379803 | 0.011195 | 0.15  | 15 | 64379803 | 0.003232 | 1.62E-40  |
| rs2073081 | C | T | C | T | -0.01732 | 0.004812 | 0.225362 | 0.362152 | 22 | 43939864 | 0.007013 | 0.49  | 22 | 43939864 | 0.00201  | 7.13E-18  |
| rs2075998 | C | T | C | T | -0.02128 | 0.004366 | 0.660041 | 0.790346 | 1  | 23523871 | 0.008267 | 0.6   | 1  | 23523871 | 0.001754 | 7.79E-34  |
| rs2096507 | A | G | A | G | -0.01416 | 0.009214 | 0.465457 | 0.43756  | 21 | 46522003 | 0.006922 | 0.18  | 21 | 46522003 | 0.001615 | 1.95E-18  |
| rs2111485 | G | A | G | A | -0.01697 | -0.00912 | 0.508109 | 0.201009 | 2  | 1.62E+08 | 0.008372 | 0.28  | 2  | 1.62E+08 | 0.001713 | 4.19E-23  |
| rs2212930 | G | A | G | A | 0.014763 | 0.011937 | 0.532356 | 0.340298 | 21 | 38486979 | 0.00728  | 0.1   | 21 | 38486979 | 0.001676 | 1.32E-18  |
| rs2219143 | A | G | A | G | 0.013959 | -0.00504 | 0.392297 | 0.370317 | 9  | 2622278  | 0.007119 | 0.48  | 9  | 2622278  | 0.001788 | 6.07E-15  |
| rs2240128 | C | T | C | T | 0.016375 | 0.001681 | 0.143782 | 0.239914 | 19 | 2187277  | 0.008148 | 0.84  | 19 | 2187277  | 0.002449 | 2.38E-11  |
| rs2267630 | A | G | A | G | 0.032622 | -0.02739 | 0.057081 | 0.084054 | 19 | 42251546 | 0.012311 | 0.026 | 19 | 42251546 | 0.003549 | 4.13E-20  |
| rs2269996 | A | G | A | G | -0.01457 | 0.002232 | 0.268424 | 0.532421 | 7  | 1.4E+08  | 0.006601 | 0.74  | 7  | 1.4E+08  | 0.001933 | 5.00E-14  |
| rs2271400 | T | C | T | C | -0.02271 | -0.00149 | 0.699045 | 0.754323 | 8  | 55878685 | 0.007896 | 0.85  | 8  | 55878685 | 0.001852 | 1.56E-34  |
| rs2286599 | A | G | A | G | 0.037565 | -0.01926 | 0.140546 | 0.045149 | 12 | 6390367  | 0.016667 | 0.25  | 12 | 6390367  | 0.00273  | 5.05E-43  |
| rs2304130 | G | A | G | A | 0.01811  | 0.003437 | 0.091892 | 0.127041 | 19 | 19678719 | 0.010267 | 0.74  | 19 | 19678719 | 0.0028   | 1.02E-10  |
| rs2347696 | C | T | C | T | -0.01585 | 0.004325 | 0.36298  | 0.276897 | 7  | 1.35E+08 | 0.007719 | 0.58  | 7  | 1.35E+08 | 0.00168  | 4.35E-21  |
| rs2369842 | T | G | T | G | 0.017518 | -0.00416 | 0.247619 | 0.107109 | 16 | 1316424  | 0.010839 | 0.7   | 16 | 1316424  | 0.001989 | 1.33E-18  |
| rs2371108 | T | G | T | G | 0.019353 | -0.01471 | 0.486269 | 0.839097 | 3  | 27715527 | 0.009271 | 0.11  | 3  | 27715527 | 0.001743 | 1.29E-28  |
| rs2458280 | G | A | G | A | -0.0174  | -0.00605 | 0.282275 | 0.364073 | 8  | 1.03E+08 | 0.007012 | 0.39  | 8  | 1.03E+08 | 0.001841 | 3.70E-21  |
| rs2462015 | C | T | C | T | 0.014524 | 0.00366  | 0.571654 | 0.399135 | 10 | 30194159 | 0.006862 | 0.59  | 10 | 30194159 | 0.001722 | 3.45E-17  |
| rs2469434 | C | T | C | T | 0.011856 | -0.00672 | 0.401843 | 0.350144 | 18 | 69876810 | 0.007244 | 0.35  | 18 | 69876810 | 0.001654 | 7.80E-13  |
| rs247826  | T | C | T | C | 0.032607 | -0.00359 | 0.204419 | 0.173631 | 16 | 84549359 | 0.009145 | 0.69  | 16 | 84549359 | 0.002013 | 5.84E-59  |
| rs2497833 | T | A | T | A | 0.010357 | -0.00403 | 0.502341 | 0.60903  | 10 | 17983041 | 0.006976 | 0.56  | 10 | 17983041 | 0.001629 | 2.11E-10  |
| rs2501309 | C | T | C | T | -0.01414 | 0.018203 | 0.582509 | 0.323967 | 1  | 22015221 | 0.007168 | 0.011 | 1  | 22015221 | 0.001713 | 1.55E-16  |
| rs2561758 | G | A | G | A | -0.03566 | 0.042767 | 0.727742 | 0.993996 | 5  | 1.74E+08 | 0.044591 | 0.34  | 5  | 1.74E+08 | 0.002048 | 6.86E-68  |
| rs2583839 | A | G | A | G | -0.01327 | -0.00192 | 0.458589 | 0.617915 | 9  | 1.31E+08 | 0.00694  | 0.78  | 9  | 1.31E+08 | 0.00165  | 9.45E-16  |
| rs2665405 | A | G | A | G | 0.03069  | -0.00279 | 0.504866 | 0.413064 | 17 | 59797931 | 0.006866 | 0.68  | 17 | 59797931 | 0.001635 | 1.38E-78  |
| rs2710804 | C | T | C | T | 0.018236 | 0.009366 | 0.330595 | 0.224304 | 7  | 36044919 | 0.00829  | 0.26  | 7  | 36044919 | 0.001732 | 6.82E-26  |
| rs2713573 | T | C | T | C | 0.02426  | 0.003313 | 0.719776 | 0.763208 | 3  | 1.29E+08 | 0.008071 | 0.68  | 3  | 1.29E+08 | 0.001807 | 4.92E-41  |
| rs2807742 | A | G | A | G | 0.031059 | -0.00103 | 0.811673 | 0.914986 | 10 | 28492438 | 0.012074 | 0.93  | 10 | 28492438 | 0.002101 | 2.16E-49  |
| rs2853075 | A | G | A | G | 0.053472 | 0.020268 | 0.040239 | 0.011768 | 4  | 36310920 | 0.032006 | 0.53  | 4  | 36310920 | 0.00424  | 1.98E-36  |
| rs2857622 | A | G | A | G | 0.021127 | 0.004725 | 0.183354 | 0.318684 | 15 | 1.01E+08 | 0.007322 | 0.52  | 15 | 1.01E+08 | 0.002219 | 1.79E-21  |
| rs2861524 | C | T | C | T | -0.02142 | -0.00945 | 0.195268 | 0.207493 | 8  | 54538633 | 0.008471 | 0.26  | 8  | 54538633 | 0.002102 | 2.29E-24  |
| rs2867816 | T | G | T | G | -0.01443 | -0.00458 | 0.309506 | 0.301873 | 17 | 43020464 | 0.007289 | 0.53  | 17 | 43020464 | 0.001802 | 1.24E-15  |
| rs2875187 | T | A | T | A | -0.02047 | 0.014434 | 0.126353 | 0.043948 | 5  | 71009726 | 0.016459 | 0.38  | 5  | 71009726 | 0.003013 | 1.12E-11  |
| rs2883497 | C | T | C | T | -0.01375 | 0.006321 | 0.32825  | 0.325648 | 8  | 27337604 | 0.007242 | 0.38  | 8  | 27337604 | 0.001729 | 1.88E-15  |
| rs2889525 | A | G | A | G | 0.065484 | -0.01379 | 0.453955 | 0.335495 | 6  | 32477302 | 0.007215 | 0.056 | 6  | 32477302 | 0.001701 | 1.00E-200 |
| rs2904270 | A | G | A | G | -0.01295 | -0.00732 | 0.542493 | 0.604707 | 20 | 50568735 | 0.007096 | 0.3   | 20 | 50568735 | 0.001629 | 1.94E-15  |
| rs2915607 | C | T | C | T | 0.01693  | 0.00883  | 0.771819 | 0.774015 | 8  | 30422400 | 0.008012 | 0.27  | 8  | 30422400 | 0.001936 | 2.31E-18  |
| rs2963471 | A | G | A | G | 0.013951 | -0.00049 | 0.225004 | 0.334534 | 5  | 1.59E+08 | 0.00734  | 0.95  | 5  | 1.59E+08 | 0.001918 | 3.63E-13  |
| rs303753  | A | G | A | G | -0.01823 | -0.0085  | 0.284667 | 0.086215 | 18 | 23494958 | 0.011967 | 0.48  | 18 | 23494958 | 0.001852 | 8.04E-23  |
| rs3131610 | A | G | A | G | -0.02358 | -0.01305 | 0.310521 | 0.533381 | 15 | 50507898 | 0.006773 | 0.054 | 15 | 50507898 | 0.00181  | 9.10E-39  |
| rs333947  | A | G | A | G | 0.021734 | -0.01382 | 0.178853 | 0.285062 | 1  | 1.1E+08  | 0.007455 | 0.064 | 1  | 1.1E+08  | 0.002207 | 7.34E-23  |

|           |   |   |   |   |          |          |          |          |    |          |          |        |    |          |          |           |
|-----------|---|---|---|---|----------|----------|----------|----------|----|----------|----------|--------|----|----------|----------|-----------|
| rs337637  | A | G | A | G | 0.016784 | -0.00461 | 0.353088 | 0.287464 | 4  | 38602849 | 0.007465 | 0.54   | 4  | 38602849 | 0.001689 | 3.14E-23  |
| rs3411241 | G | A | G | A | 0.026172 | 0.00495  | 0.068514 | 0.117675 | 14 | 69374185 | 0.010434 | 0.64   | 14 | 69374185 | 0.003221 | 4.67E-16  |
| rs3418057 | T | C | T | C | 0.018208 | 0.011366 | 0.170595 | 0.041547 | 1  | 2.21E+08 | 0.016939 | 0.5    | 1  | 2.21E+08 | 0.002135 | 1.55E-17  |
| rs342242  | C | T | C | T | -0.01674 | -0.00805 | 0.392777 | 0.251921 | 7  | 1.07E+08 | 0.007785 | 0.3    | 7  | 1.07E+08 | 0.001691 | 4.52E-23  |
| rs3495231 | A | G | A | G | -0.03328 | 0.035669 | 0.041361 | 0.014169 | 20 | 11196407 | 0.029242 | 0.22   | 20 | 11196407 | 0.004267 | 6.58E-15  |
| rs3573424 | C | T | C | T | 0.017843 | -0.00365 | 0.434888 | 0.449568 | 4  | 712911   | 0.007046 | 0.6    | 4  | 712911   | 0.001695 | 6.91E-26  |
| rs3732378 | A | G | A | G | 0.01992  | -0.01315 | 0.142533 | 0.028818 | 3  | 39265671 | 0.019969 | 0.51   | 3  | 39265671 | 0.002314 | 7.82E-18  |
| rs3735007 | A | G | A | G | -0.01095 | -0.00417 | 0.470249 | 0.363353 | 7  | 1.39E+08 | 0.006991 | 0.55   | 7  | 1.39E+08 | 0.00163  | 1.89E-11  |
| rs3735485 | G | A | G | A | 0.040271 | 0.008335 | 0.864755 | 0.900576 | 7  | 44969742 | 0.01152  | 0.47   | 7  | 44969742 | 0.002392 | 1.56E-63  |
| rs3747869 | C | A | C | A | 0.038139 | -0.00446 | 0.887996 | 0.808838 | 10 | 71760875 | 0.008657 | 0.61   | 10 | 71760875 | 0.002665 | 2.12E-46  |
| rs3781454 | A | G | A | G | 0.023296 | 0.008515 | 0.649431 | 0.668348 | 10 | 1.25E+08 | 0.0072   | 0.24   | 10 | 1.25E+08 | 0.001719 | 8.60E-42  |
| rs3793537 | C | G | C | G | 0.017823 | 0.012812 | 0.295123 | 0.289145 | 9  | 35687559 | 0.007535 | 0.089  | 9  | 35687559 | 0.001772 | 8.89E-24  |
| rs3795503 | T | C | T | C | -0.01422 | 0.001332 | 0.346145 | 0.46926  | 1  | 1.81E+08 | 0.006811 | 0.84   | 1  | 1.81E+08 | 0.001753 | 5.18E-16  |
| rs3812849 | C | A | C | A | 0.018345 | 0.006585 | 0.247233 | 0.163064 | 13 | 74127599 | 0.009065 | 0.47   | 13 | 74127599 | 0.001913 | 9.64E-22  |
| rs3825761 | C | T | C | T | -0.01196 | -0.00255 | 0.61884  | 0.54635  | 14 | 1.05E+08 | 0.006833 | 0.71   | 14 | 1.05E+08 | 0.001724 | 4.13E-12  |
| rs385893  | C | T | C | T | 0.01611  | 0.008994 | 0.562514 | 0.770173 | 9  | 4763176  | 0.00796  | 0.26   | 9  | 4763176  | 0.001665 | 4.18E-22  |
| rs38859   | T | C | T | C | 0.011484 | 0.0045   | 0.456869 | 0.471902 | 7  | 1.17E+08 | 0.006811 | 0.51   | 7  | 1.17E+08 | 0.001626 | 1.70E-12  |
| rs3917932 | G | C | G | C | -0.04258 | -0.00705 | 0.585271 | 0.610471 | 1  | 36478315 | 0.007002 | 0.31   | 1  | 36478315 | 0.001642 | 3.64E-148 |
| rs3931    | G | A | G | A | 0.023208 | -0.00464 | 0.318355 | 0.259126 | 2  | 1.69E+08 | 0.007782 | 0.55   | 2  | 1.69E+08 | 0.00173  | 5.62E-41  |
| rs398474  | A | G | A | G | 0.01361  | -0.00467 | 0.325327 | 0.56244  | 15 | 62506836 | 0.006814 | 0.49   | 15 | 62506836 | 0.001758 | 1.03E-14  |
| rs413141  | G | A | G | A | 0.015911 | 0.007688 | 0.813462 | 0.756484 | 19 | 6675978  | 0.008056 | 0.34   | 19 | 6675978  | 0.002195 | 4.33E-13  |
| rs4142967 | T | C | T | C | -0.01939 | -0.00832 | 0.369719 | 0.085735 | 6  | 90286630 | 0.011747 | 0.48   | 6  | 90286630 | 0.001774 | 9.18E-28  |
| rs4147108 | G | A | G | A | 0.015583 | 0.014503 | 0.254718 | 0.347262 | 1  | 38833751 | 0.007264 | 0.046  | 1  | 38833751 | 0.00187  | 8.40E-17  |
| rs4256842 | T | C | T | C | 0.003978 | -0.00126 | 0.710618 | 0.744236 | 1  | 1.07E+08 | 0.007763 | 0.87   | 1  | 1.07E+08 | 0.001822 | 0.029001  |
| rs4272720 | G | C | G | A | -0.02342 | 0.010305 | 0.223329 | 0.051873 | 10 | 49055156 | 0.015438 | 0.5    | 10 | 49055156 | 0.002153 | 1.63E-27  |
| rs4355178 | A | G | A | G | -0.01831 | 0.004657 | 0.368474 | 0.793948 | 20 | 1950227  | 0.008426 | 0.58   | 20 | 1950227  | 0.001812 | 5.42E-24  |
| rs439749  | A | G | A | G | -0.01447 | 0.009814 | 0.707674 | 0.923391 | 20 | 57393057 | 0.012236 | 0.42   | 20 | 57393057 | 0.00188  | 1.46E-14  |
| rs4413892 | A | G | A | G | 0.029225 | -0.00283 | 0.23589  | 0.042027 | 9  | 1.36E+08 | 0.016977 | 0.87   | 9  | 1.36E+08 | 0.002003 | 3.73E-48  |
| rs4432538 | A | G | A | G | -0.0196  | 0.007534 | 0.485651 | 0.335975 | 20 | 8626746  | 0.007385 | 0.31   | 20 | 8626746  | 0.001616 | 8.54E-34  |
| rs445     | T | C | T | C | -0.08936 | -0.00889 | 0.145643 | 0.332133 | 7  | 92779056 | 0.007238 | 0.22   | 7  | 92779056 | 0.002361 | 1.00E-200 |
| rs447802  | C | T | C | T | -0.01474 | -0.00171 | 0.369561 | 0.728866 | 19 | 48613102 | 0.007511 | 0.82   | 19 | 48613102 | 0.001913 | 1.38E-14  |
| rs4519779 | A | G | A | G | 0.017152 | -0.00301 | 0.489981 | 0.397695 | 4  | 1.51E+08 | 0.007137 | 0.67   | 4  | 1.51E+08 | 0.001644 | 1.89E-25  |
| rs4534048 | G | A | G | A | 0.011192 | -0.00996 | 0.239541 | 0.154659 | 7  | 21904567 | 0.009386 | 0.29   | 7  | 21904567 | 0.001939 | 8.02E-09  |
| rs4568584 | T | C | T | C | 0.014753 | 0.01854  | 0.75381  | 0.942363 | 8  | 1.29E+08 | 0.013948 | 0.18   | 8  | 1.29E+08 | 0.001951 | 4.21E-14  |
| rs4574603 | T | C | T | C | -0.016   | 0.0095   | 0.503268 | 0.618876 | 6  | 87107187 | 0.007067 | 0.18   | 6  | 87107187 | 0.001617 | 4.46E-23  |
| rs4632345 | A | G | A | G | -0.01328 | 0.000229 | 0.602441 | 0.268492 | 2  | 16521386 | 0.007461 | 0.98   | 2  | 16521386 | 0.001718 | 1.12E-14  |
| rs464609  | A | G | A | G | 0.010524 | -0.00076 | 0.502579 | 0.404899 | 5  | 34654372 | 0.006883 | 0.91   | 5  | 34654372 | 0.001629 | 1.09E-10  |
| rs4703133 | G | C | G | C | -0.01345 | 0.020352 | 0.363088 | 0.23439  | 5  | 1.01E+08 | 0.007892 | 0.0099 | 5  | 1.01E+08 | 0.00168  | 1.27E-15  |
| rs4703881 | A | G | A | G | -0.03324 | -0.02291 | 0.894852 | 0.960135 | 5  | 72446024 | 0.017565 | 0.19   | 5  | 72446024 | 0.002636 | 2.03E-36  |
| rs4704835 | A | G | A | G | -0.02041 | 0.018223 | 0.846064 | 0.933958 | 5  | 1.57E+08 | 0.013926 | 0.19   | 5  | 1.57E+08 | 0.002212 | 2.96E-20  |
| rs4710971 | G | A | G | A | -0.0192  | -0.00591 | 0.622674 | 0.608549 | 6  | 21383185 | 0.007114 | 0.41   | 6  | 21383185 | 0.001656 | 4.67E-31  |
| rs473068  | G | A | G | A | 0.014143 | -0.0064  | 0.155267 | 0.184198 | 1  | 1.12E+08 | 0.008691 | 0.46   | 1  | 1.12E+08 | 0.002251 | 3.44E-10  |
| rs4734879 | G | A | G | A | -0.02032 | -0.00763 | 0.301273 | 0.427474 | 8  | 1.06E+08 | 0.006899 | 0.27   | 8  | 1.06E+08 | 0.00176  | 8.18E-31  |

|           |   |   |   |   |          |          |          |          |    |          |          |       |    |          |          |           |
|-----------|---|---|---|---|----------|----------|----------|----------|----|----------|----------|-------|----|----------|----------|-----------|
| rs4760    | G | A | G | A | -0.06975 | 0.010138 | 0.147921 | 0.016811 | 19 | 43648948 | 0.026562 | 0.7   | 19 | 43648948 | 0.002563 | 5.50E-163 |
| rs4761234 | C | T | C | T | 0.013948 | -0.00975 | 0.458309 | 0.431076 | 12 | 69338325 | 0.006916 | 0.16  | 12 | 69338325 | 0.001631 | 1.27E-17  |
| rs476386  | T | C | T | C | 0.016191 | 0.011225 | 0.45272  | 0.49952  | 1  | 1.08E+08 | 0.006845 | 0.1   | 1  | 1.08E+08 | 0.001616 | 1.33E-23  |
| rs4803336 | T | C | T | C | -0.01582 | 0.013597 | 0.16326  | 0.101105 | 19 | 40420075 | 0.011302 | 0.23  | 19 | 40420075 | 0.002225 | 1.19E-12  |
| rs4807440 | T | G | T | G | 0.022625 | -0.00202 | 0.602487 | 0.428674 | 19 | 1026478  | 0.007014 | 0.77  | 19 | 1026478  | 0.001773 | 2.87E-37  |
| rs4811528 | A | G | A | G | -0.01276 | 0.000246 | 0.732254 | 0.644092 | 20 | 38159027 | 0.007085 | 0.97  | 20 | 38159027 | 0.001876 | 1.08E-11  |
| rs4836600 | T | A | T | A | -0.01516 | 0.00866  | 0.710271 | 0.448847 | 9  | 1.28E+08 | 0.006889 | 0.21  | 9  | 1.28E+08 | 0.00211  | 7.10E-13  |
| rs4842200 | C | T | C | T | 0.017095 | 0.010577 | 0.305443 | 0.392411 | 9  | 1.35E+08 | 0.007052 | 0.13  | 9  | 1.35E+08 | 0.001778 | 7.44E-22  |
| rs4842316 | T | C | T | C | -0.01439 | -0.00794 | 0.594967 | 0.42147  | 12 | 79580785 | 0.007065 | 0.26  | 12 | 79580785 | 0.001758 | 2.88E-16  |
| rs4899652 | G | A | G | A | 0.015629 | -0.00388 | 0.376514 | 0.106388 | 14 | 77382629 | 0.010856 | 0.72  | 14 | 77382629 | 0.001776 | 1.44E-18  |
| rs4948097 | G | A | G | A | -0.01634 | -0.00924 | 0.723378 | 0.68732  | 7  | 55988878 | 0.007592 | 0.22  | 7  | 55988878 | 0.001814 | 2.27E-19  |
| rs4978410 | T | G | T | G | 0.020583 | -0.00452 | 0.174088 | 0.213497 | 9  | 1.1E+08  | 0.008451 | 0.59  | 9  | 1.1E+08  | 0.00216  | 1.67E-21  |
| rs519464  | G | A | G | A | -0.00588 | -0.01221 | 0.743743 | 0.7805   | 1  | 1.78E+08 | 0.008265 | 0.14  | 1  | 1.78E+08 | 0.001873 | 0.001687  |
| rs554743  | T | C | T | C | -0.01256 | 0.01427  | 0.684246 | 0.60879  | 20 | 3681495  | 0.007009 | 0.042 | 20 | 3681495  | 0.001845 | 1.06E-11  |
| rs5608240 | C | T | C | T | 0.013923 | 0.004333 | 0.448707 | 0.660183 | 3  | 1.57E+08 | 0.007139 | 0.54  | 3  | 1.57E+08 | 0.001672 | 8.73E-17  |
| rs5618886 | C | T | C | T | -0.02408 | -0.00416 | 0.383224 | 0.382565 | 1  | 2.47E+08 | 0.006971 | 0.55  | 1  | 2.47E+08 | 0.001657 | 8.58E-48  |
| rs5638817 | T | G | T | G | 0.056711 | -0.00633 | 0.283687 | 0.184918 | 7  | 28684757 | 0.008702 | 0.47  | 7  | 28684757 | 0.001829 | 1.00E-200 |
| rs571497  | A | G | A | G | -0.03518 | -0.03028 | 0.157579 | 0.009606 | 19 | 7762944  | 0.035329 | 0.39  | 19 | 7762944  | 0.002506 | 9.49E-45  |
| rs5752360 | T | C | T | C | -0.01505 | 0.001495 | 0.202984 | 0.367195 | 22 | 26629953 | 0.007202 | 0.84  | 22 | 26629953 | 0.002164 | 3.65E-12  |
| rs5840842 | C | T | C | T | -0.02343 | -0.00409 | 0.229036 | 0.376801 | 4  | 56903658 | 0.007021 | 0.56  | 4  | 56903658 | 0.001958 | 5.62E-33  |
| rs5963187 | C | T | C | T | -0.03579 | -0.00324 | 0.937229 | 0.717819 | 15 | 79984036 | 0.007533 | 0.67  | 15 | 79984036 | 0.003967 | 1.97E-19  |
| rs6046684 | A | C | A | C | -0.02075 | 0.007336 | 0.119365 | 0.232949 | 7  | 7985209  | 0.008159 | 0.37  | 7  | 7985209  | 0.00257  | 7.17E-16  |
| rs605783  | A | T | A | T | -0.0128  | -0.00375 | 0.576137 | 0.644332 | 6  | 10526140 | 0.007233 | 0.6   | 6  | 10526140 | 0.001661 | 1.36E-14  |
| rs610578  | G | A | G | A | -0.01539 | -0.00491 | 0.6975   | 0.833573 | 12 | 1.21E+08 | 0.009105 | 0.59  | 12 | 1.21E+08 | 0.001769 | 3.50E-18  |
| rs6185065 | A | G | A | G | -0.02199 | 0.011299 | 0.125102 | 0.144332 | 1  | 2.26E+08 | 0.009879 | 0.25  | 1  | 2.26E+08 | 0.002439 | 2.07E-19  |
| rs6194205 | G | C | G | C | -0.01298 | 0.004329 | 0.314764 | 0.01561  | 12 | 48707963 | 0.025939 | 0.87  | 12 | 48707963 | 0.001942 | 2.39E-11  |
| rs6198501 | T | C | A | T | -0.03821 | 0.026487 | 0.063807 | 0.01489  | 14 | 68740170 | 0.028527 | 0.35  | 14 | 68740170 | 0.003308 | 8.14E-31  |
| rs6211989 | A | G | A | G | 0.0172   | -0.01324 | 0.129467 | 0.215658 | 19 | 17559147 | 0.008337 | 0.11  | 19 | 17559147 | 0.002445 | 2.05E-12  |
| rs6214107 | T | C | T | C | 0.022694 | -0.00916 | 0.350726 | 0.214697 | 2  | 65417482 | 0.008059 | 0.26  | 2  | 65417482 | 0.001734 | 4.17E-39  |
| rs6226202 | G | A | G | A | -0.02345 | 0.032708 | 0.13803  | 0.995917 | 3  | 1.08E+08 | 0.053938 | 0.54  | 3  | 1.08E+08 | 0.002376 | 6.11E-23  |
| rs6246631 | T | C | T | C | -0.02053 | 0.006255 | 0.178468 | 0.107589 | 7  | 73627755 | 0.01106  | 0.57  | 7  | 73627755 | 0.00219  | 7.72E-21  |
| rs6251850 | G | A | G | A | -0.03652 | -0.00223 | 0.111948 | 0.790586 | 8  | 78260489 | 0.008326 | 0.79  | 8  | 78260489 | 0.002586 | 3.01E-45  |
| rs6445826 | C | T | C | T | 0.011816 | -0.00716 | 0.459288 | 0.322526 | 3  | 56814971 | 0.00727  | 0.32  | 3  | 56814971 | 0.001671 | 1.62E-12  |
| rs646698  | A | G | A | G | -0.01646 | -0.01056 | 0.804527 | 0.920749 | 9  | 76702806 | 0.012314 | 0.39  | 9  | 76702806 | 0.00208  | 2.72E-15  |
| rs6584278 | T | C | T | C | -0.01662 | -0.00257 | 0.422933 | 0.506004 | 10 | 99518342 | 0.006782 | 0.7   | 10 | 99518342 | 0.001643 | 5.06E-24  |
| rs6585139 | C | T | C | T | 0.013142 | -0.01093 | 0.730192 | 0.770653 | 10 | 1.12E+08 | 0.00818  | 0.18  | 10 | 1.12E+08 | 0.001811 | 4.16E-13  |
| rs6651495 | A | G | A | G | -0.01983 | -0.00514 | 0.453446 | 0.408261 | 5  | 69315756 | 0.006951 | 0.46  | 5  | 69315756 | 0.001694 | 1.24E-31  |
| rs6700311 | G | C | G | C | 0.012775 | -0.01819 | 0.301315 | 0.256724 | 19 | 34997029 | 0.007813 | 0.02  | 19 | 34997029 | 0.001788 | 9.37E-13  |
| rs6714557 | C | T | C | T | -0.03978 | -0.003   | 0.042045 | 0.774496 | 5  | 1.51E+08 | 0.008208 | 0.71  | 5  | 1.51E+08 | 0.00444  | 3.41E-19  |
| rs6734238 | G | A | G | A | 0.036121 | -0.00838 | 0.325488 | 0.103987 | 2  | 1.13E+08 | 0.010904 | 0.44  | 2  | 1.13E+08 | 0.001851 | 1.04E-84  |
| rs674451  | C | T | C | T | 0.014444 | 0.000102 | 0.278062 | 0.1244   | 6  | 1.38E+08 | 0.010328 | 0.99  | 6  | 1.38E+08 | 0.001856 | 7.59E-15  |
| rs6779340 | G | C | G | C | -0.01728 | -0.0093  | 0.265086 | 0.035783 | 3  | 58047974 | 0.017195 | 0.59  | 3  | 58047974 | 0.001916 | 2.00E-19  |
| rs681167  | A | G | A | G | 0.013    | 0.002457 | 0.592277 | 0.849183 | 20 | 2919333  | 0.009682 | 0.8   | 20 | 2919333  | 0.001727 | 5.33E-14  |

|           |   |   |   |   |          |          |          |          |    |          |          |        |    |          |          |           |
|-----------|---|---|---|---|----------|----------|----------|----------|----|----------|----------|--------|----|----------|----------|-----------|
| rs6826663 | C | T | C | T | 0.017565 | 0.010959 | 0.140605 | 0.148895 | 4  | 53351440 | 0.009426 | 0.24   | 4  | 53351440 | 0.002327 | 4.56E-14  |
| rs6882226 | A | T | A | T | 0.020847 | 0.005397 | 0.625132 | 0.634486 | 5  | 1.42E+08 | 0.007024 | 0.44   | 5  | 1.42E+08 | 0.00166  | 4.06E-36  |
| rs6985508 | A | G | A | G | -0.02398 | 0.014968 | 0.369475 | 0.457733 | 8  | 1.41E+08 | 0.006742 | 0.026  | 8  | 1.41E+08 | 0.001731 | 1.35E-43  |
| rs6990622 | A | G | A | G | 0.01487  | -0.00273 | 0.525465 | 0.535543 | 8  | 1.25E+08 | 0.00676  | 0.69   | 8  | 1.25E+08 | 0.001623 | 5.30E-20  |
| rs710241  | A | G | A | G | -0.01202 | -0.00811 | 0.406158 | 0.60975  | 1  | 41732629 | 0.006919 | 0.24   | 1  | 41732629 | 0.001718 | 2.77E-12  |
| rs7107912 | A | G | A | G | 0.018214 | -0.00516 | 0.435368 | 0.245917 | 11 | 65835781 | 0.00782  | 0.51   | 11 | 65835781 | 0.001681 | 2.57E-27  |
| rs7127313 | T | C | T | C | 0.016429 | -0.00646 | 0.330652 | 0.237512 | 11 | 1.01E+08 | 0.008085 | 0.42   | 11 | 1.01E+08 | 0.001726 | 1.90E-21  |
| rs720419  | T | C | T | C | -0.01297 | -0.01326 | 0.318841 | 0.336695 | 4  | 1.1E+08  | 0.007295 | 0.069  | 4  | 1.1E+08  | 0.001728 | 6.57E-14  |
| rs7223465 | G | A | G | A | -0.01452 | -0.00097 | 0.379896 | 0.20341  | 17 | 78260451 | 0.008433 | 0.91   | 17 | 78260451 | 0.001831 | 2.28E-15  |
| rs7225843 | C | T | C | T | -0.02572 | 0.007028 | 0.211516 | 0.225744 | 17 | 2098531  | 0.008141 | 0.39   | 17 | 2098531  | 0.001991 | 3.91E-38  |
| rs7279086 | C | T | C | T | -0.02586 | -0.00452 | 0.262334 | 0.087416 | 10 | 44384812 | 0.012174 | 0.71   | 10 | 44384812 | 0.00186  | 6.53E-44  |
| rs7280064 | T | C | T | C | -0.0169  | -0.00045 | 0.211243 | 0.304515 | 21 | 15005329 | 0.007515 | 0.95   | 21 | 15005329 | 0.002075 | 3.92E-16  |
| rs7297371 | T | A | T | A | -0.03229 | 0.074693 | 0.065131 | 0.004323 | 18 | 76360290 | 0.049713 | 0.13   | 18 | 76360290 | 0.003665 | 1.32E-18  |
| rs7301953 | A | G | A | G | -0.01776 | 0.002609 | 0.280067 | 0.128242 | 12 | 1.24E+08 | 0.010331 | 0.8    | 12 | 1.24E+08 | 0.001811 | 1.13E-22  |
| rs7326825 | A | G | A | G | 0.017847 | 0.002637 | 0.685511 | 0.642651 | 13 | 49539314 | 0.007228 | 0.72   | 13 | 49539314 | 0.001753 | 2.56E-24  |
| rs7426631 | T | G | T | G | -0.07831 | 0.000318 | 0.966481 | 0.825648 | 2  | 1.36E+08 | 0.008795 | 0.97   | 2  | 1.36E+08 | 0.005095 | 2.93E-53  |
| rs7537229 | A | G | A | G | 0.027418 | 0.025811 | 0.914613 | 0.955572 | 1  | 56440602 | 0.016861 | 0.13   | 1  | 56440602 | 0.002928 | 8.14E-21  |
| rs7547562 | G | C | G | C | 0.024332 | 0.007669 | 0.133559 | 0.3439   | 2  | 54560455 | 0.007029 | 0.28   | 2  | 54560455 | 0.002597 | 7.73E-21  |
| rs7549164 | T | C | T | C | 0.018922 | 0.004695 | 0.239067 | 0.475504 | 1  | 30751346 | 0.006805 | 0.49   | 1  | 30751346 | 0.002064 | 5.14E-20  |
| rs7578550 | A | G | A | G | -0.01269 | -0.00223 | 0.41618  | 0.677474 | 1  | 37474398 | 0.00723  | 0.76   | 1  | 37474398 | 0.00173  | 2.33E-13  |
| rs7586834 | T | C | T | C | -0.01779 | 0.017442 | 0.200583 | 0.381364 | 2  | 1.52E+08 | 0.007041 | 0.013  | 2  | 1.52E+08 | 0.002056 | 5.24E-18  |
| rs7596385 | A | G | A | G | 0.059494 | -0.02549 | 0.984009 | 0.963977 | 11 | 95363157 | 0.018619 | 0.17   | 11 | 95363157 | 0.007013 | 2.32E-17  |
| rs7626444 | C | G | C | G | -0.02937 | -0.007   | 0.39967  | 0.251441 | 3  | 1.97E+08 | 0.008011 | 0.38   | 3  | 1.97E+08 | 0.001652 | 1.12E-70  |
| rs7641325 | A | G | A | G | -0.02428 | 0.00927  | 0.402435 | 0.267531 | 3  | 12227104 | 0.007829 | 0.24   | 3  | 12227104 | 0.001649 | 4.75E-49  |
| rs7752183 | A | C | A | C | 0.017681 | 0.002578 | 0.114405 | 0.123919 | 6  | 45604762 | 0.010551 | 0.81   | 6  | 45604762 | 0.002549 | 4.20E-12  |
| rs7771156 | A | G | A | G | -0.0108  | 0.000217 | 0.393536 | 0.754083 | 6  | 1.51E+08 | 0.007889 | 0.98   | 6  | 1.51E+08 | 0.001701 | 2.20E-10  |
| rs7776054 | G | A | G | A | -0.04531 | 0.002046 | 0.274602 | 0.204851 | 6  | 1.35E+08 | 0.008406 | 0.81   | 6  | 1.35E+08 | 0.001803 | 3.09E-139 |
| rs7776857 | T | G | T | G | -0.01803 | -0.01104 | 0.673183 | 0.983429 | 7  | 22715149 | 0.025282 | 0.66   | 7  | 22715149 | 0.001926 | 8.51E-21  |
| rs7781509 | A | G | A | G | -0.0137  | 0.010302 | 0.38275  | 0.325648 | 7  | 47325075 | 0.007254 | 0.16   | 7  | 47325075 | 0.001653 | 1.20E-16  |
| rs7803075 | G | A | G | A | -0.02291 | -0.01492 | 0.594596 | 0.130644 | 7  | 1.31E+08 | 0.009942 | 0.13   | 7  | 1.31E+08 | 0.001924 | 1.20E-32  |
| rs7846314 | T | A | T | A | 0.043352 | -0.00661 | 0.190981 | 0.136407 | 8  | 60738272 | 0.009799 | 0.5    | 8  | 60738272 | 0.002053 | 5.99E-99  |
| rs7867734 | G | A | G | A | 0.027015 | 0.027672 | 0.062115 | 0.005524 | 11 | 1.02E+08 | 0.046388 | 0.55   | 11 | 1.02E+08 | 0.003743 | 5.49E-13  |
| rs7901056 | G | T | G | T | 0.014829 | -0.01602 | 0.343837 | 0.074448 | 10 | 26423554 | 0.012926 | 0.22   | 10 | 26423554 | 0.001751 | 2.58E-17  |
| rs7924975 | C | G | C | G | 0.012909 | 0.007398 | 0.369394 | 0.348703 | 11 | 1.2E+08  | 0.007144 | 0.3    | 11 | 1.2E+08  | 0.001672 | 1.21E-14  |
| rs7926034 | A | C | A | C | -0.02019 | -0.01261 | 0.059726 | 0.082853 | 4  | 26296666 | 0.01266  | 0.32   | 4  | 26296666 | 0.003438 | 4.41E-09  |
| rs7955734 | G | C | G | C | -0.02722 | -0.00868 | 0.23172  | 0.184438 | 12 | 4223993  | 0.00883  | 0.33   | 12 | 4223993  | 0.00196  | 8.37E-44  |
| rs796003  | T | G | T | G | -0.02248 | 0.002459 | 0.262161 | 0.267531 | 9  | 83980886 | 0.007808 | 0.75   | 9  | 83980886 | 0.001844 | 3.80E-34  |
| rs796056  | C | A | C | A | 0.018991 | 0.023204 | 0.656902 | 0.764649 | 2  | 1.01E+08 | 0.008026 | 0.0038 | 2  | 1.01E+08 | 0.001706 | 9.43E-29  |
| rs7971658 | A | G | A | G | -0.03613 | -0.02724 | 0.120139 | 0.021374 | 2  | 1.43E+08 | 0.023447 | 0.25   | 2  | 1.43E+08 | 0.002799 | 4.40E-38  |
| rs832187  | T | C | T | C | -0.01377 | 0.005351 | 0.60147  | 0.465898 | 3  | 63847374 | 0.0069   | 0.44   | 3  | 63847374 | 0.001659 | 1.09E-16  |
| rs835574  | T | C | T | C | -0.00125 | 0.001819 | 0.125241 | 0.146254 | 1  | 1.2E+08  | 0.009465 | 0.85   | 1  | 1.2E+08  | 0.002553 | 0.623561  |
| rs853198  | C | A | C | A | -0.01719 | -0.00546 | 0.705839 | 0.950288 | 17 | 37489236 | 0.015484 | 0.72   | 17 | 37489236 | 0.001822 | 4.17E-21  |
| rs874356  | T | A | T | A | 0.011326 | -0.01637 | 0.57487  | 0.431556 | 22 | 31157368 | 0.006929 | 0.018  | 22 | 31157368 | 0.001716 | 4.20E-11  |

|           |   |   |   |   |          |          |          |          |    |          |          |       |    |          |          |          |
|-----------|---|---|---|---|----------|----------|----------|----------|----|----------|----------|-------|----|----------|----------|----------|
| rs899013  | G | A | G | A | 0.012627 | -0.00524 | 0.626473 | 0.745437 | 11 | 10455142 | 0.007708 | 0.5   | 11 | 10455142 | 0.001673 | 4.59E-14 |
| rs900835  | T | C | T | C | -0.01765 | 0.000674 | 0.175798 | 0.158982 | 1  | 42946784 | 0.009441 | 0.94  | 1  | 42946784 | 0.002142 | 1.81E-16 |
| rs9287604 | C | G | C | G | 0.024289 | -0.01    | 0.701333 | 0.690682 | 2  | 2.37E+08 | 0.007437 | 0.18  | 2  | 2.37E+08 | 0.001797 | 1.35E-41 |
| rs935655  | G | T | G | T | 0.013546 | -0.00296 | 0.77267  | 0.698127 | 2  | 45840306 | 0.007452 | 0.69  | 2  | 45840306 | 0.001935 | 2.68E-12 |
| rs9375447 | G | A | G | A | -0.01365 | -0.006   | 0.593063 | 0.931076 | 6  | 1.27E+08 | 0.012807 | 0.64  | 6  | 1.27E+08 | 0.00179  | 2.60E-14 |
| rs9375700 | C | T | C | T | 0.010475 | -0.00238 | 0.680105 | 0.761287 | 6  | 1.3E+08  | 0.007989 | 0.77  | 6  | 1.3E+08  | 0.001752 | 2.30E-09 |
| rs9390460 | C | T | C | T | 0.01482  | -0.00024 | 0.481383 | 0.306436 | 6  | 1.47E+08 | 0.007319 | 0.97  | 6  | 1.47E+08 | 0.00165  | 2.89E-19 |
| rs9487043 | T | C | T | C | 0.019581 | -0.00994 | 0.482771 | 0.346302 | 6  | 1.09E+08 | 0.007082 | 0.16  | 6  | 1.09E+08 | 0.001614 | 8.02E-34 |
| rs9608255 | C | T | C | T | -0.01788 | -0.00189 | 0.283797 | 0.215898 | 22 | 24227169 | 0.008337 | 0.82  | 22 | 24227169 | 0.001829 | 1.51E-22 |
| rs9672995 | C | T | C | T | -0.01107 | 0.011358 | 0.244907 | 0.451009 | 15 | 75005260 | 0.006835 | 0.097 | 15 | 75005260 | 0.00193  | 1.00E-08 |
| rs9747839 | G | C | G | C | 0.018677 | -0.00398 | 0.474686 | 0.379203 | 17 | 83136753 | 0.006985 | 0.57  | 17 | 83136753 | 0.002157 | 5.10E-18 |
| rs9773718 | T | C | T | C | -0.03677 | 0.003717 | 0.200499 | 0.185879 | 9  | 1.33E+08 | 0.008722 | 0.67  | 9  | 1.33E+08 | 0.002016 | 2.77E-74 |
| rs9819371 | T | C | T | C | -0.04528 | -0.022   | 0.063948 | 0.005764 | 3  | 1.41E+08 | 0.045474 | 0.63  | 3  | 1.41E+08 | 0.003714 | 3.72E-34 |
| rs9832919 | G | A | G | A | 0.011269 | 0.000405 | 0.366529 | 0.409222 | 3  | 1.32E+08 | 0.006966 | 0.95  | 3  | 1.32E+08 | 0.00169  | 2.70E-11 |
| rs9867398 | T | C | T | C | 0.019695 | 0.002079 | 0.122047 | 0.146013 | 3  | 1.86E+08 | 0.009648 | 0.83  | 3  | 1.86E+08 | 0.002555 | 1.33E-14 |
| rs9905106 | C | T | C | T | 0.01703  | -0.00899 | 0.688425 | 0.46878  | 17 | 1470224  | 0.006682 | 0.18  | 17 | 1470224  | 0.001856 | 4.85E-20 |
| rs9965539 | A | G | A | G | 0.024537 | 0.009347 | 0.155232 | 0.178915 | 18 | 44393814 | 0.008914 | 0.29  | 18 | 44393814 | 0.002268 | 3.03E-27 |
| rs9970896 | C | T | T | A | -0.0574  | -0.01319 | 0.895898 | 0.025696 | 1  | 2.36E+08 | 0.021555 | 0.54  | 1  | 2.36E+08 | 0.00293  | 2.04E-85 |
| rs9977672 | A | G | A | G | -0.02149 | 0.006739 | 0.237136 | 0.167867 | 21 | 39091357 | 0.009079 | 0.46  | 21 | 39091357 | 0.001919 | 4.70E-29 |

Supplementary Table 2m. List of SNPs for Neutrophil Count and their effects on TEWL

| SNP          | effect_allele | other_allele | effect_allele | other_allele | beta.Neu | beta.TEWL | eaf.Neu  | eaf.TEWL | chr.TEWL | pos.TEWL | se.TEWL  | pval.TEWL | chr.Neu | pos.Neu  | se.Neu   | pval.Neu  |
|--------------|---------------|--------------|---------------|--------------|----------|-----------|----------|----------|----------|----------|----------|-----------|---------|----------|----------|-----------|
| chr1:1740: A | G             | A            | G             | G            | -0.0178  | -0.01363  | 0.296649 | 0.567723 | 1        | 1.74E+08 | 0.006706 | 0.042     | 1       | 1.74E+08 | 0.001954 | 9.15E-20  |
| chr1:2003: C | T             | C            | T             | T            | -0.01331 | -0.01388  | 0.370849 | 0.700048 | 1        | 2E+08    | 0.007455 | 0.063     | 1       | 2E+08    | 0.001847 | 6.04E-13  |
| chr1:2051: A | G             | G            | C             | C            | 0.014831 | -0.03894  | 0.610037 | 0.027618 | 1        | 2.05E+08 | 0.020845 | 0.062     | 1       | 2.05E+08 | 0.001872 | 2.44E-15  |
| chr1:3075: A | G             | A            | G             | G            | 0.022591 | 0.007383  | 0.657746 | 0.2817   | 1        | 30757821 | 0.007411 | 0.32      | 1       | 30757821 | 0.001888 | 5.82E-33  |
| chr10:102: G | A             | G            | A             | A            | -0.0263  | 0.001069  | 0.283885 | 0.506484 | 10       | 1.03E+08 | 0.006855 | 0.88      | 10      | 1.03E+08 | 0.00195  | 2.15E-41  |
| chr10:944: C | T             | C            | G             | G            | -0.0125  | -0.00885  | 0.413957 | 0.189481 | 10       | 94450643 | 0.008576 | 0.3       | 10      | 94450643 | 0.001803 | 4.27E-12  |
| chr11:114: C | T             | T            | A             | A            | 0.022599 | -0.01237  | 0.51893  | 0.291787 | 11       | 1.14E+08 | 0.007565 | 0.1       | 11      | 1.14E+08 | 0.001766 | 1.90E-37  |
| chr11:122: C | A             | T            | C             | C            | 0.016627 | 0.001008  | 0.212663 | 0.103987 | 11       | 1.23E+08 | 0.011166 | 0.93      | 11      | 1.23E+08 | 0.002184 | 2.76E-14  |
| chr11:128: T | C             | T            | C             | C            | -0.01454 | -0.00836  | 0.560419 | 0.184678 | 11       | 1.28E+08 | 0.00888  | 0.35      | 11      | 1.28E+08 | 0.001875 | 9.26E-15  |
| chr11:308: G | A             | G            | A             | A            | 0.012747 | -0.01147  | 0.693756 | 0.925552 | 11       | 308314   | 0.012474 | 0.36      | 11      | 308314   | 0.001942 | 5.44E-11  |
| chr11:618: A | G             | A            | G             | G            | -0.01678 | 0.002437  | 0.178613 | 0.428674 | 11       | 61813896 | 0.006566 | 0.71      | 11      | 61813896 | 0.002311 | 3.95E-13  |
| chr11:658: T | A             | A            | G             | G            | -0.02225 | 0.002263  | 0.126825 | 0.363353 | 11       | 65857720 | 0.006956 | 0.74      | 11      | 65857720 | 0.00307  | 4.49E-13  |
| chr11:696: C | T             | C            | A             | A            | -0.03762 | -0.01057  | 0.884995 | 0.163545 | 11       | 69685018 | 0.009263 | 0.25      | 11      | 69685018 | 0.002772 | 6.32E-42  |
| chr11:880: C | T             | C            | T             | T            | 0.021507 | 0.004952  | 0.488272 | 0.629923 | 11       | 8801946  | 0.007059 | 0.48      | 11      | 8801946  | 0.001783 | 1.74E-33  |
| chr12:111: A | G             | A            | G             | G            | 0.032993 | -0.00864  | 0.066471 | 0.012968 | 12       | 1.11E+08 | 0.028479 | 0.76      | 12      | 1.11E+08 | 0.0038   | 4.11E-18  |
| chr12:121: A | G             | A            | G             | G            | 0.017151 | -0.00427  | 0.454748 | 0.426753 | 12       | 1.22E+08 | 0.007041 | 0.54      | 12      | 1.22E+08 | 0.001803 | 2.02E-21  |
| chr12:519: T | C             | T            | C             | C            | -0.04651 | -0.00871  | 0.043534 | 0.852065 | 12       | 51912002 | 0.009598 | 0.36      | 12      | 51912002 | 0.004681 | 3.08E-23  |
| chr12:884: G | T             | A            | G             | G            | -0.01825 | -0.00244  | 0.618526 | 0.198847 | 12       | 88449697 | 0.008477 | 0.77      | 12      | 88449697 | 0.001808 | 6.45E-24  |
| chr13:280: A | G             | A            | G             | G            | -0.02106 | 0.014336  | 0.106018 | 0.185879 | 13       | 28038749 | 0.008973 | 0.11      | 13      | 28038749 | 0.002947 | 9.26E-13  |
| chr13:495: T | G             | C            | T             | T            | -0.01568 | -0.00301  | 0.220402 | 0.473343 | 13       | 49548545 | 0.006839 | 0.66      | 13      | 49548545 | 0.002152 | 3.35E-13  |
| chr14:926: A | G             | G            | C             | C            | 0.014167 | -0.00653  | 0.382296 | 0.016811 | 14       | 92631994 | 0.026517 | 0.81      | 14      | 92631994 | 0.00189  | 6.82E-14  |
| chr15:770: G | A             | G            | A             | A            | 0.028221 | 0.004199  | 0.858024 | 0.194765 | 15       | 77013944 | 0.008493 | 0.62      | 15      | 77013944 | 0.002556 | 2.62E-28  |
| chr15:775: A | G             | A            | G             | G            | -0.01106 | -0.02065  | 0.387605 | 0.758646 | 15       | 77535756 | 0.008038 | 0.01      | 15      | 77535756 | 0.001802 | 8.73E-10  |
| chr16:211: T | C             | T            | C             | C            | -0.02684 | -0.00494  | 0.123697 | 0.963737 | 16       | 2115629  | 0.018323 | 0.79      | 16      | 2115629  | 0.002676 | 1.20E-23  |
| chr16:304: T | C             | C            | G             | G            | -0.08968 | -0.0255   | 0.128316 | 0.102305 | 16       | 30474072 | 0.011365 | 0.025     | 16      | 30474072 | 0.002691 | 1.00E-200 |
| chr16:815: T | C             | T            | C             | C            | 0.020647 | -0.00396  | 0.474144 | 0.212296 | 16       | 81569795 | 0.008266 | 0.63      | 16      | 81569795 | 0.001754 | 6.21E-32  |
| chr17:298: T | C             | T            | C             | C            | -0.02585 | 0.009617  | 0.399891 | 0.315802 | 17       | 29831797 | 0.007337 | 0.19      | 17      | 29831797 | 0.001809 | 2.89E-46  |
| chr17:399: C | G             | C            | G             | G            | 0.010857 | -0.00684  | 0.62945  | 0.685879 | 17       | 39958724 | 0.007424 | 0.36      | 17      | 39958724 | 0.001827 | 2.90E-09  |
| chr17:480: T | C             | T            | C             | C            | 0.016764 | -0.01062  | 0.169513 | 0.229587 | 17       | 48000601 | 0.008096 | 0.19      | 17      | 48000601 | 0.002351 | 1.04E-12  |
| chr17:542: C | T             | C            | T             | T            | 0.015447 | -0.01744  | 0.167048 | 0.044428 | 17       | 5422842  | 0.016745 | 0.3       | 17      | 5422842  | 0.002386 | 9.94E-11  |
| chr17:733: C | T             | C            | T             | T            | -0.0227  | -0.00364  | 0.19406  | 0.92195  | 17       | 7337072  | 0.012945 | 0.78      | 17      | 7337072  | 0.002222 | 1.81E-24  |
| chr19:102: T | G             | T            | G             | G            | -0.06521 | -0.00512  | 0.990098 | 0.610231 | 19       | 10223987 | 0.0071   | 0.47      | 19      | 10223987 | 0.00968  | 1.68E-11  |
| chr19:103: G | T             | T            | C             | C            | 0.258476 | -0.00414  | 0.991269 | 0.317963 | 19       | 1036019  | 0.00736  | 0.57      | 19      | 1036019  | 0.01093  | 1.45E-123 |
| chr19:394: A | G             | A            | G             | G            | 0.018756 | -0.00526  | 0.336694 | 0.527618 | 19       | 39456187 | 0.006928 | 0.45      | 19      | 39456187 | 0.001905 | 7.52E-23  |
| chr19:412: G | A             | C            | G             | G            | -0.02022 | -0.00399  | 0.312816 | 0.464697 | 19       | 41205703 | 0.006789 | 0.56      | 19      | 41205703 | 0.001949 | 3.44E-25  |
| chr19:512: T | C             | T            | C             | C            | 0.022198 | 0.000255  | 0.114012 | 0.182757 | 19       | 51225221 | 0.008829 | 0.98      | 19      | 51225221 | 0.002923 | 3.21E-14  |
| chr2:1011: C | T             | A            | C             | C            | -0.01461 | -0.02356  | 0.617881 | 0.235351 | 2        | 1.01E+08 | 0.008026 | 0.0033    | 2       | 1.01E+08 | 0.001879 | 7.82E-15  |
| chr2:1447: T | C             | G            | C             | C            | -0.04273 | 0.002749  | 0.117949 | 0.212296 | 2        | 1.45E+08 | 0.008372 | 0.74      | 2       | 1.45E+08 | 0.002831 | 1.95E-51  |
| chr2:2416: T | C             | T            | C             | C            | 0.020046 | -0.01143  | 0.782204 | 0.190922 | 2        | 24164663 | 0.008792 | 0.19      | 2       | 24164663 | 0.00217  | 2.72E-20  |
| chr2:3124: A | C             | C            | T             | T            | 0.013783 | 0.003398  | 0.577451 | 0.116234 | 2        | 31240984 | 0.010678 | 0.75      | 2       | 31240984 | 0.001839 | 7.00E-14  |
| chr2:6642: A | G             | C            | G             | G            | 0.020672 | 0.006213  | 0.200116 | 0.43756  | 2        | 66425850 | 0.006723 | 0.36      | 2       | 66425850 | 0.002232 | 2.12E-20  |

|             |   |   |   |          |           |          |          |    |          |          |         |    |          |          |           |
|-------------|---|---|---|----------|-----------|----------|----------|----|----------|----------|---------|----|----------|----------|-----------|
| chr2:8531:G | A | A | C | 0.014306 | -0.01026  | 0.770754 | 0.120797 | 2  | 85313657 | 0.010347 | 0.32    | 2  | 85313657 | 0.002235 | 1.61E-10  |
| chr20:637:A | G | A | G | -0.01318 | -0.02558  | 0.370454 | 0.566523 | 20 | 63706054 | 0.006812 | 0.00017 | 20 | 63706054 | 0.00186  | 1.47E-12  |
| chr22:311:C | T | T | G | 0.017454 | -0.01092  | 0.185236 | 0.112872 | 22 | 31184360 | 0.010295 | 0.29    | 22 | 31184360 | 0.00246  | 1.34E-12  |
| chr3:1075:A | G | A | C | -0.0129  | -0.03844  | 0.360293 | 0.003362 | 3  | 1.08E+08 | 0.059382 | 0.52    | 3  | 1.08E+08 | 0.00187  | 5.46E-12  |
| chr3:6385:C | G | C | T | 0.020366 | -0.00301  | 0.573614 | 0.530019 | 3  | 63856953 | 0.006888 | 0.66    | 3  | 63856953 | 0.001897 | 7.24E-27  |
| chr3:7147:T | C | T | C | -0.01914 | -0.01685  | 0.356008 | 0.104947 | 3  | 71479792 | 0.010466 | 0.11    | 3  | 71479792 | 0.001885 | 3.46E-24  |
| chr4:2628:T | G | C | T | -0.01828 | -0.00645  | 0.315597 | 0.088136 | 4  | 26281184 | 0.012217 | 0.6     | 4  | 26281184 | 0.001938 | 4.15E-21  |
| chr4:5454:A | G | A | T | -0.03413 | 0.005499  | 0.043075 | 0.350144 | 4  | 54542708 | 0.00726  | 0.45    | 4  | 54542708 | 0.004355 | 4.87E-15  |
| chr4:6968:C | G | G | A | 0.070939 | 0.004655  | 0.54133  | 0.270653 | 4  | 6968192  | 0.007727 | 0.55    | 4  | 6968192  | 0.001782 | 1.00E-200 |
| chr5:1228:T | C | T | C | -0.01293 | -0.01121  | 0.641169 | 0.631604 | 5  | 1.23E+08 | 0.006991 | 0.11    | 5  | 1.23E+08 | 0.00188  | 6.43E-12  |
| chr5:1285:T | C | T | G | 0.031911 | -6.94E-06 | 0.139022 | 0.396494 | 5  | 1285859  | 0.006994 | 1       | 5  | 1285859  | 0.002554 | 8.84E-36  |
| chr5:1796:T | G | G | A | 0.004189 | -0.00339  | 0.529222 | 0.376081 | 5  | 1.8E+08  | 0.007085 | 0.63    | 5  | 1.8E+08  | 0.001767 | 0.017797  |
| chr5:5801:C | T | C | T | -0.0208  | -0.00965  | 0.623998 | 0.894092 | 5  | 58019808 | 0.01113  | 0.39    | 5  | 58019808 | 0.00182  | 3.15E-30  |
| chr6:1093:C | A | G | A | -0.024   | -0.01264  | 0.452649 | 0.362872 | 6  | 1.09E+08 | 0.007051 | 0.073   | 6  | 1.09E+08 | 0.001928 | 1.52E-35  |
| chr6:1265:C | T | C | T | -0.02642 | 0.008171  | 0.381089 | 0.070845 | 6  | 1.27E+08 | 0.012646 | 0.52    | 6  | 1.27E+08 | 0.00181  | 3.27E-48  |
| chr6:1367:G | C | T | C | -0.05029 | 0.003077  | 0.582546 | 0.504563 | 6  | 1.37E+08 | 0.006801 | 0.65    | 6  | 1.37E+08 | 0.001787 | 3.01E-174 |
| chr6:1675:C | A | G | C | 0.017671 | 0.000347  | 0.653842 | 0.414505 | 6  | 16752633 | 0.006748 | 0.96    | 6  | 16752633 | 0.001848 | 1.25E-21  |
| chr6:2138:C | T | A | C | -0.00642 | 0.007061  | 0.091031 | 0.39025  | 6  | 21382534 | 0.007104 | 0.32    | 6  | 21382534 | 0.003315 | 0.0529    |
| chr6:8727:T | C | C | G | 0.020089 | -0.01024  | 0.177091 | 0.385687 | 6  | 87271017 | 0.007074 | 0.15    | 6  | 87271017 | 0.002295 | 2.21E-18  |
| chr7:1491:T | C | T | C | -0.01726 | 7.85E-05  | 0.247272 | 0.887608 | 7  | 1.49E+08 | 0.010766 | 0.99    | 7  | 1.49E+08 | 0.002092 | 1.64E-16  |
| chr7:5600:G | A | G | A | 0.016542 | -0.00726  | 0.634381 | 0.691402 | 7  | 56004317 | 0.007594 | 0.34    | 7  | 56004317 | 0.001884 | 1.71E-18  |
| chr7:6652:A | G | A | G | -0.03924 | 0.00587   | 0.410983 | 0.06196  | 7  | 6652974  | 0.013891 | 0.67    | 7  | 6652974  | 0.001874 | 2.59E-97  |
| chr7:9830:G | A | G | A | 0.013424 | 0.002121  | 0.446468 | 0.331892 | 7  | 98304289 | 0.007042 | 0.76    | 7  | 98304289 | 0.001789 | 6.39E-14  |
| chr8:1296:A | G | A | G | -0.03871 | 0.00104   | 0.032733 | 0.371037 | 8  | 1.3E+08  | 0.007061 | 0.88    | 8  | 1.3E+08  | 0.005277 | 2.29E-13  |
| chr8:5687:G | T | G | A | 0.013223 | 0.000206  | 0.204533 | 0.058838 | 8  | 5687469  | 0.014421 | 0.99    | 8  | 5687469  | 0.002203 | 1.99E-09  |
| chr8:7043:T | G | C | G | -0.03075 | -0.0009   | 0.098781 | 0.389529 | 8  | 7043782  | 0.006907 | 0.9     | 8  | 7043782  | 0.003157 | 2.16E-22  |
| chr9:1280:A | T | A | T | 0.020549 | 0.009796  | 0.133782 | 0.451969 | 9  | 1.28E+08 | 0.006896 | 0.16    | 9  | 1.28E+08 | 0.002582 | 1.84E-15  |
| rs1004874:A | G | A | G | 0.018526 | -0.01589  | 0.658978 | 0.055956 | 2  | 68735005 | 0.014624 | 0.28    | 2  | 68735005 | 0.001884 | 8.56E-23  |
| rs1007893:C | A | G | A | -0.02804 | 0.008114  | 0.595863 | 0.442843 | 21 | 46457681 | 0.006897 | 0.24    | 21 | 46457681 | 0.00188  | 2.95E-50  |
| rs1010109:G | A | G | A | -0.07491 | 0.007872  | 0.148643 | 0.091499 | 5  | 1.43E+08 | 0.012054 | 0.51    | 5  | 1.43E+08 | 0.002662 | 3.38E-174 |
| rs1014696:G | A | G | A | -0.01894 | -0.00375  | 0.639771 | 0.607589 | 14 | 1.01E+08 | 0.006992 | 0.59    | 14 | 1.01E+08 | 0.002066 | 5.09E-20  |
| rs1025687:C | T | C | T | 0.021917 | 0.008473  | 0.544162 | 0.628002 | 18 | 50621423 | 0.007101 | 0.23    | 18 | 50621423 | 0.001799 | 4.20E-34  |
| rs1038193:T | C | C | G | 0.014396 | 0.012984  | 0.372709 | 0.345581 | 9  | 1.35E+08 | 0.007301 | 0.075   | 9  | 1.35E+08 | 0.001845 | 6.37E-15  |
| rs1042286:C | T | C | T | 0.049171 | 0.000111  | 0.465718 | 0.575889 | 19 | 33403940 | 0.006775 | 0.99    | 19 | 33403940 | 0.002089 | 2.12E-122 |
| rs1047891:C | T | T | G | -0.01371 | -0.00569  | 0.286789 | 0.165946 | 2  | 2.11E+08 | 0.009281 | 0.54    | 2  | 2.11E+08 | 0.001967 | 3.38E-12  |
| rs1050991:T | C | T | A | -0.06947 | 0.001932  | 0.572933 | 0.308117 | 10 | 1.1E+08  | 0.007368 | 0.79    | 10 | 1.1E+08  | 0.001792 | 1.00E-200 |
| rs1074960:A | G | A | G | 0.055498 | -0.01006  | 0.043478 | 0.858549 | 10 | 80489996 | 0.009726 | 0.3     | 10 | 80489996 | 0.004455 | 1.40E-35  |
| rs1078579:C | T | A | C | -0.01379 | 0.005407  | 0.434028 | 0.475985 | 1  | 1.07E+08 | 0.006938 | 0.44    | 1  | 1.07E+08 | 0.001841 | 6.97E-14  |
| rs1078632:C | T | G | C | 0.019588 | -0.00948  | 0.431375 | 0.317963 | 10 | 97308981 | 0.007281 | 0.19    | 10 | 97308981 | 0.001845 | 2.62E-26  |
| rs1080856:A | G | A | G | 0.015275 | -0.0118   | 0.724068 | 0.435159 | 8  | 1.28E+08 | 0.006907 | 0.088   | 8  | 1.28E+08 | 0.001995 | 1.97E-14  |
| rs1082339:A | G | A | G | 0.018957 | -0.00131  | 0.27664  | 0.194765 | 10 | 69483278 | 0.008755 | 0.88    | 10 | 69483278 | 0.001971 | 7.18E-22  |
| rs1083173:A | T | G | A | -0.02103 | -0.00274  | 0.846625 | 0.369356 | 11 | 12114765 | 0.007135 | 0.7     | 11 | 12114765 | 0.002467 | 1.63E-17  |
| rs1084902:C | T | C | G | -0.03217 | -0.00886  | 0.265227 | 0.184678 | 12 | 4222843  | 0.008814 | 0.31    | 12 | 4222843  | 0.002007 | 9.09E-58  |

|             |   |   |   |          |          |          |          |    |          |          |       |    |          |          |           |
|-------------|---|---|---|----------|----------|----------|----------|----|----------|----------|-------|----|----------|----------|-----------|
| rs1086436 A | G | A | G | 0.013724 | 0.017261 | 0.597136 | 0.151777 | 1  | 8858254  | 0.008815 | 0.05  | 1  | 8858254  | 0.001817 | 4.40E-14  |
| rs1088957 A | G | A | G | -0.01272 | -0.00965 | 0.424266 | 0.787464 | 1  | 65683658 | 0.007711 | 0.21  | 1  | 65683658 | 0.001811 | 2.28E-12  |
| rs1091269 A | G | A | G | 0.01345  | 0.003423 | 0.679635 | 0.356148 | 1  | 1.71E+08 | 0.007018 | 0.63  | 1  | 1.71E+08 | 0.001923 | 2.75E-12  |
| rs1094803 A | G | T | G | -0.01801 | -0.00153 | 0.226686 | 0.154899 | 6  | 42542567 | 0.009531 | 0.87  | 6  | 42542567 | 0.002189 | 2.03E-16  |
| rs1098172 A | C | G | C | -0.01291 | 0.019124 | 0.408151 | 0.068924 | 9  | 1.13E+08 | 0.01303  | 0.14  | 9  | 1.13E+08 | 0.001821 | 1.39E-12  |
| rs1099243 A | T | A | G | -0.03078 | 0.000463 | 0.058146 | 0.288425 | 9  | 92721221 | 0.00728  | 0.95  | 9  | 92721221 | 0.004199 | 2.40E-13  |
| rs1099547 A | C | G | A | -0.02291 | -0.00912 | 0.442172 | 0.301393 | 10 | 63250912 | 0.007321 | 0.21  | 10 | 63250912 | 0.001845 | 2.26E-35  |
| rs1102713 T | C | G | T | -0.01619 | -0.00051 | 0.268743 | 0.331172 | 1  | 1.73E+08 | 0.00712  | 0.94  | 1  | 1.73E+08 | 0.001987 | 3.93E-16  |
| rs1107251 C | T | T | A | 0.016932 | -0.00526 | 0.345277 | 0.016811 | 15 | 74932469 | 0.026911 | 0.85  | 15 | 74932469 | 0.001868 | 1.35E-19  |
| rs1108239 A | G | A | G | 0.016761 | 0.008696 | 0.389722 | 0.175793 | 18 | 44492751 | 0.009029 | 0.34  | 18 | 44492751 | 0.001915 | 2.26E-18  |
| rs1121262 C | T | C | T | 0.014388 | 0.003884 | 0.448579 | 0.43828  | 11 | 1.08E+08 | 0.006784 | 0.57  | 11 | 1.08E+08 | 0.001764 | 3.67E-16  |
| rs1124009 G | A | G | A | 0.016756 | 0.009831 | 0.424257 | 0.337656 | 1  | 1.48E+08 | 0.007394 | 0.18  | 1  | 1.48E+08 | 0.001781 | 5.32E-21  |
| rs1125841 C | T | C | T | -0.02142 | 0.010685 | 0.410286 | 0.334294 | 10 | 13494086 | 0.007227 | 0.14  | 10 | 13494086 | 0.001801 | 1.42E-32  |
| rs1126380 C | T | C | T | -0.01305 | 0.007238 | 0.402639 | 0.20365  | 2  | 70121038 | 0.008472 | 0.39  | 2  | 70121038 | 0.001886 | 4.79E-12  |
| rs1148947 A | G | A | G | 0.019305 | -0.00357 | 0.147402 | 0.014649 | 10 | 88017202 | 0.02876  | 0.9   | 10 | 88017202 | 0.002476 | 6.67E-15  |
| rs1164412 G | A | G | A | -0.01967 | 0.003247 | 0.293602 | 0.799472 | 16 | 57025062 | 0.008367 | 0.7   | 16 | 57025062 | 0.001931 | 2.51E-24  |
| rs1164628 A | G | A | G | -0.01723 | 0.015144 | 0.183132 | 0.39001  | 16 | 3669343  | 0.006895 | 0.028 | 16 | 3669343  | 0.002298 | 6.77E-14  |
| rs1164866 G | A | G | A | -0.02031 | -0.00992 | 0.264948 | 0.776657 | 16 | 53088574 | 0.008168 | 0.22  | 16 | 53088574 | 0.002034 | 1.85E-23  |
| rs1167071 G | A | T | G | 0.461355 | 0.013702 | 0.997133 | 0.088617 | 19 | 11808063 | 0.011875 | 0.25  | 19 | 11808063 | 0.018138 | 1.20E-142 |
| rs1167309 T | C | T | C | 0.034541 | -0.00853 | 0.042013 | 0.044909 | 19 | 45238836 | 0.015978 | 0.59  | 19 | 45238836 | 0.004511 | 1.98E-14  |
| rs1169520 T | C | T | C | 0.01662  | -0.02181 | 0.409791 | 0.942123 | 2  | 1.27E+08 | 0.014498 | 0.13  | 2  | 1.27E+08 | 0.001872 | 7.25E-19  |
| rs1171255 T | C | T | C | 0.018617 | 0.013282 | 0.208969 | 0.775216 | 3  | 1.41E+08 | 0.008174 | 0.1   | 3  | 1.41E+08 | 0.002181 | 1.45E-17  |
| rs1181210 C | G | A | G | -0.02033 | -0.02545 | 0.195041 | 0.009846 | 17 | 57385975 | 0.034091 | 0.46  | 17 | 57385975 | 0.00223  | 8.36E-20  |
| rs1182183 A | G | A | G | 0.042574 | -0.00762 | 0.907878 | 0.201489 | 7  | 2833502  | 0.008692 | 0.38  | 7  | 2833502  | 0.003069 | 1.00E-43  |
| rs1182394 G | T | T | C | -0.01576 | 0.006382 | 0.557966 | 0.276897 | 11 | 47701960 | 0.007724 | 0.41  | 11 | 47701960 | 0.001781 | 9.04E-19  |
| rs1192740 A | G | A | G | 0.015375 | -0.00255 | 0.197679 | 0.443804 | 3  | 98684125 | 0.006987 | 0.72  | 3  | 98684125 | 0.002213 | 3.85E-12  |
| rs1196064 A | G | T | G | -0.04836 | -0.00039 | 0.256335 | 0.254323 | 5  | 1.49E+08 | 0.007698 | 0.96  | 5  | 1.49E+08 | 0.002151 | 7.60E-112 |
| rs1215624 A | C | A | G | -0.01923 | -0.00564 | 0.295218 | 0.467579 | 8  | 86061448 | 0.006856 | 0.41  | 8  | 86061448 | 0.001943 | 4.78E-23  |
| rs1219604 C | T | G | T | -0.05864 | -0.00247 | 0.894316 | 0.243276 | 6  | 1.21E+08 | 0.007675 | 0.75  | 6  | 1.21E+08 | 0.003052 | 3.13E-82  |
| rs1220674 C | T | G | C | 0.015905 | -0.01626 | 0.722099 | 0.071806 | 6  | 52420596 | 0.012993 | 0.21  | 6  | 52420596 | 0.001955 | 4.31E-16  |
| rs1242570 C | T | C | T | -0.01715 | 0.003841 | 0.752333 | 0.278818 | 12 | 50216538 | 0.00763  | 0.61  | 12 | 50216538 | 0.002057 | 8.16E-17  |
| rs1245035 A | G | T | G | -0.02004 | -0.00295 | 0.517527 | 0.32781  | 12 | 64582269 | 0.00734  | 0.69  | 12 | 64582269 | 0.001783 | 2.78E-29  |
| rs12453 T   | C | T | C | -0.01627 | -0.00199 | 0.499979 | 0.745917 | 11 | 60178272 | 0.007739 | 0.8   | 11 | 60178272 | 0.001776 | 5.61E-20  |
| rs1248126 T | A | C | T | 0.014729 | -0.00293 | 0.473819 | 0.323007 | 20 | 8146273  | 0.007281 | 0.69  | 20 | 8146273  | 0.001908 | 1.24E-14  |
| rs1250568 T | C | T | C | 0.014385 | 0.005471 | 0.503755 | 0.544428 | 10 | 79285523 | 0.006814 | 0.42  | 10 | 79285523 | 0.001759 | 3.09E-16  |
| rs1255061 G | A | G | A | 0.028228 | -0.00447 | 0.062875 | 0.194284 | 8  | 23109256 | 0.008786 | 0.61  | 8  | 23109256 | 0.003668 | 1.48E-14  |
| rs1260326 G | A | G | A | -0.11341 | 0.003182 | 0.009374 | 0.538665 | 2  | 27508073 | 0.006816 | 0.64  | 2  | 27508073 | 0.010279 | 2.83E-28  |
| rs1263309 C | T | C | T | 0.017203 | 0.003981 | 0.490945 | 0.554035 | 4  | 3050213  | 0.006896 | 0.56  | 4  | 3050213  | 0.001787 | 6.65E-22  |
| rs1274279 T | C | C | A | -0.01274 | 0.008119 | 0.593897 | 0.027618 | 1  | 27061994 | 0.020331 | 0.69  | 1  | 27061994 | 0.001801 | 1.54E-12  |
| rs1275932 A | G | A | G | 0.032828 | 0.007179 | 0.796308 | 0.454851 | 1  | 41757169 | 0.006794 | 0.29  | 1  | 41757169 | 0.002216 | 1.31E-49  |
| rs1288587 A | G | A | G | 0.017922 | -0.00613 | 0.162423 | 0.181556 | 14 | 1.04E+08 | 0.00885  | 0.49  | 14 | 1.04E+08 | 0.002417 | 1.28E-13  |
| rs1290950 T | G | A | G | -0.01425 | 0.009112 | 0.668116 | 0.433237 | 15 | 50812153 | 0.006833 | 0.18  | 15 | 50812153 | 0.002012 | 1.46E-12  |
| rs1292076 C | T | C | T | 0.017551 | -0.00997 | 0.636468 | 0.120797 | 16 | 1312186  | 0.010297 | 0.33  | 16 | 1312186  | 0.001918 | 5.91E-20  |



|           |   |   |   |   |          |           |          |          |    |          |          |         |    |          |          |           |
|-----------|---|---|---|---|----------|-----------|----------|----------|----|----------|----------|---------|----|----------|----------|-----------|
| rs1292735 | G | C | A | C | 0.021764 | 0.011972  | 0.56731  | 0.01585  | 16 | 74562720 | 0.026462 | 0.65    | 16 | 74562720 | 0.001851 | 6.93E-32  |
| rs1321309 | C | A | T | C | -0.0028  | 0.000153  | 0.44346  | 0.349183 | 6  | 36670859 | 0.007075 | 0.98    | 6  | 36670859 | 0.001831 | 0.126647  |
| rs1328909 | G | A | A | C | 0.030745 | 0.001031  | 0.13831  | 0.085735 | 9  | 1.29E+08 | 0.01227  | 0.93    | 9  | 1.29E+08 | 0.00256  | 3.48E-33  |
| rs1329166 | G | C | G | A | 0.027441 | 0.037578  | 0.11172  | 0.017531 | 9  | 282738   | 0.024433 | 0.12    | 9  | 282738   | 0.003007 | 7.65E-20  |
| rs1362622 | T | C | T | C | -0.01649 | 0.005249  | 0.723805 | 0.095821 | 16 | 49851826 | 0.011717 | 0.65    | 16 | 49851826 | 0.002052 | 9.57E-16  |
| rs1366045 | T | C | T | C | -0.0166  | 0.010964  | 0.633161 | 0.341499 | 3  | 42867558 | 0.007362 | 0.14    | 3  | 42867558 | 0.001943 | 1.35E-17  |
| rs1375493 | A | T | A | G | 0.015196 | -0.00293  | 0.430279 | 0.386167 | 2  | 1.81E+08 | 0.007002 | 0.68    | 2  | 1.81E+08 | 0.00194  | 5.02E-15  |
| rs1386451 | T | C | C | A | 0.046954 | -0.00833  | 0.032234 | 0.263208 | 10 | 67826634 | 0.007824 | 0.29    | 10 | 67826634 | 0.005313 | 1.03E-18  |
| rs1412444 | T | A | T | C | 0.031072 | 0.011747  | 0.26649  | 0.347022 | 10 | 89243170 | 0.007105 | 0.098   | 10 | 89243170 | 0.002027 | 5.47E-53  |
| rs1445171 | A | C | A | G | -0.01277 | 0.02573   | 0.32388  | 0.276897 | 5  | 1.01E+08 | 0.007643 | 0.00076 | 5  | 1.01E+08 | 0.00193  | 3.89E-11  |
| rs1446707 | G | A | G | A | 0.013163 | -0.00805  | 0.36386  | 0.008405 | 2  | 2.18E+08 | 0.03774  | 0.83    | 2  | 2.18E+08 | 0.001842 | 9.31E-13  |
| rs1468102 | A | C | G | C | 0.034007 | 0.012299  | 0.325839 | 0.351345 | 11 | 2983296  | 0.007175 | 0.086   | 11 | 2983296  | 0.002    | 9.02E-65  |
| rs1490077 | T | C | T | C | -0.01429 | 0.02181   | 0.637002 | 0.101105 | 7  | 50330658 | 0.011449 | 0.057   | 7  | 50330658 | 0.00193  | 1.35E-13  |
| rs1684335 | G | C | T | A | 0.014053 | 0.002066  | 0.348547 | 0.126321 | 1  | 1.99E+08 | 0.010348 | 0.84    | 1  | 1.99E+08 | 0.001913 | 2.10E-13  |
| rs1693037 | G | A | G | A | 0.013358 | 0.012584  | 0.195939 | 0.086455 | 12 | 3278531  | 0.0123   | 0.31    | 12 | 3278531  | 0.002218 | 1.77E-09  |
| rs1700589 | C | T | C | T | -0.01552 | -5.10E-05 | 0.438304 | 0.663545 | 4  | 82626709 | 0.007295 | 0.99    | 4  | 82626709 | 0.001796 | 5.86E-18  |
| rs1738668 | C | G | G | T | -0.02354 | -0.02127  | 0.501502 | 0.061239 | 14 | 35132881 | 0.013903 | 0.13    | 14 | 35132881 | 0.001757 | 6.77E-41  |
| rs1746782 | T | C | T | C | -0.02284 | -0.00418  | 0.212491 | 0.742555 | 4  | 71739800 | 0.007681 | 0.59    | 4  | 71739800 | 0.002295 | 2.63E-23  |
| rs1800961 | C | G | T | C | -0.00117 | -0.00754  | 0.756915 | 0.01489  | 20 | 44413724 | 0.027641 | 0.78    | 20 | 44413724 | 0.00344  | 0.733369  |
| rs1883587 | G | C | T | A | 0.057242 | 0.088895  | 0.459185 | 0.005043 | 12 | 1.2E+08  | 0.048578 | 0.067   | 12 | 1.2E+08  | 0.001802 | 1.00E-200 |
| rs1894401 | C | T | C | T | -0.01436 | 0.00376   | 0.731641 | 0.183958 | 15 | 90885812 | 0.008629 | 0.66    | 15 | 90885812 | 0.002001 | 7.56E-13  |
| rs1926168 | T | C | T | C | 0.013391 | -0.04495  | 0.299603 | 0.021854 | 11 | 1.18E+08 | 0.022703 | 0.048   | 11 | 1.18E+08 | 0.001928 | 3.93E-12  |
| rs1948760 | C | T | A | T | 0.015422 | -0.01283  | 0.674774 | 0.011287 | 5  | 1.57E+08 | 0.032665 | 0.69    | 5  | 1.57E+08 | 0.001912 | 7.63E-16  |
| rs1966479 | C | T | C | T | 0.026487 | -0.00542  | 0.090033 | 0.896494 | 5  | 1.19E+08 | 0.010832 | 0.62    | 5  | 1.19E+08 | 0.00312  | 2.18E-17  |
| rs1985157 | G | T | G | A | -0.02708 | -0.00947  | 0.093418 | 0.182277 | 19 | 18402784 | 0.00877  | 0.28    | 19 | 18402784 | 0.003392 | 1.50E-15  |
| rs1990760 | A | G | A | G | 0.040748 | -0.00784  | 0.927283 | 0.223103 | 2  | 1.62E+08 | 0.007982 | 0.33    | 2  | 1.62E+08 | 0.003515 | 4.85E-31  |
| rs1991651 | G | A | C | G | 0.039918 | -0.01422  | 0.359097 | 0.273535 | 8  | 10848901 | 0.007654 | 0.063   | 8  | 10848901 | 0.001874 | 1.19E-100 |
| rs2012011 | T | A | A | G | -0.03181 | 0.006737  | 0.051128 | 0.159702 | 6  | 46925618 | 0.009414 | 0.47    | 6  | 46925618 | 0.004192 | 3.39E-14  |
| rs2038700 | C | T | C | T | -0.01392 | -0.00916  | 0.549685 | 0.450528 | 14 | 24992783 | 0.006918 | 0.19    | 14 | 24992783 | 0.00181  | 1.56E-14  |
| rs2062250 | T | G | C | T | 0.069426 | 0.016001  | 0.289812 | 0.091018 | 15 | 64379803 | 0.011195 | 0.15    | 15 | 64379803 | 0.001976 | 1.00E-200 |
| rs2072448 | T | C | T | C | 0.016072 | 9.81E-05  | 0.421117 | 0.605668 | 12 | 8058101  | 0.006936 | 0.99    | 12 | 8058101  | 0.001795 | 3.66E-19  |
| rs211440  | G | T | C | T | -0.01369 | 0.007575  | 0.087028 | 0.214938 | 6  | 1.33E+08 | 0.008269 | 0.36    | 6  | 1.33E+08 | 0.002365 | 7.21E-09  |
| rs211959  | C | T | C | T | -0.02474 | -0.00244  | 0.106037 | 0.504803 | 21 | 17578144 | 0.006686 | 0.72    | 21 | 17578144 | 0.003161 | 5.28E-15  |
| rs212409  | A | G | A | G | -0.02121 | 0.007718  | 0.756889 | 0.479827 | 6  | 1.59E+08 | 0.00661  | 0.24    | 6  | 1.59E+08 | 0.002061 | 8.32E-25  |
| rs2212931 | T | C | T | C | -0.018   | -0.01434  | 0.547649 | 0.837896 | 21 | 38487267 | 0.009161 | 0.12    | 21 | 38487267 | 0.001908 | 4.06E-21  |
| rs2219143 | T | G | T | C | -0.01907 | -0.00504  | 0.469235 | 0.370317 | 9  | 2622278  | 0.007119 | 0.48    | 9  | 2622278  | 0.001762 | 2.89E-27  |
| rs2240775 | T | G | G | A | -0.02586 | 0.005401  | 0.135095 | 0.240154 | 17 | 76714046 | 0.007988 | 0.5     | 17 | 76714046 | 0.002686 | 6.36E-22  |
| rs2261003 | T | C | A | C | -0.01594 | 0.009327  | 0.281648 | 0.388809 | 13 | 1.14E+08 | 0.007058 | 0.19    | 13 | 1.14E+08 | 0.001957 | 3.96E-16  |
| rs2271400 | G | C | C | T | 0.011636 | 0.001486  | 0.682082 | 0.245677 | 8  | 55878685 | 0.007896 | 0.85    | 8  | 55878685 | 0.001905 | 1.04E-09  |
| rs2290846 | T | C | T | C | -0.02365 | -0.0013   | 0.075201 | 0.261527 | 4  | 1.5E+08  | 0.007847 | 0.87    | 4  | 1.5E+08  | 0.003576 | 3.89E-11  |
| rs2338823 | G | C | T | C | -0.01049 | -0.0054   | 0.458354 | 0.365514 | 5  | 1.42E+08 | 0.007024 | 0.44    | 5  | 1.42E+08 | 0.001792 | 4.97E-09  |
| rs2412771 | A | G | A | G | 0.026004 | 0.000635  | 0.517184 | 0.570605 | 4  | 56895251 | 0.00683  | 0.93    | 4  | 56895251 | 0.001782 | 3.35E-48  |
| rs2421200 | T | G | T | G | 0.021989 | 0.004179  | 0.295409 | 0.330211 | 2  | 61484680 | 0.00723  | 0.56    | 2  | 61484680 | 0.001931 | 5.13E-30  |

|           |   |   |   |          |          |          |          |    |          |          |       |    |          |          |          |
|-----------|---|---|---|----------|----------|----------|----------|----|----------|----------|-------|----|----------|----------|----------|
| rs2458280 | G | A | A | -0.01577 | -0.00605 | 0.211419 | 0.364073 | 8  | 1.03E+08 | 0.007012 | 0.39  | 8  | 1.03E+08 | 0.002194 | 6.97E-13 |
| rs2469434 | G | A | A | 0.015716 | -0.00672 | 0.275131 | 0.350144 | 18 | 69876810 | 0.007244 | 0.35  | 18 | 69876810 | 0.00204  | 1.38E-14 |
| rs2475787 | T | C | C | -0.02333 | 0.000853 | 0.20664  | 0.544188 | 6  | 85705518 | 0.006778 | 0.9   | 6  | 85705518 | 0.002193 | 2.04E-26 |
| rs247826  | T | C | C | 0.014113 | -0.00359 | 0.301343 | 0.173631 | 16 | 84549359 | 0.009145 | 0.69  | 16 | 84549359 | 0.001945 | 4.20E-13 |
| rs2482819 | T | C | C | 0.016692 | 0.006461 | 0.697022 | 0.278578 | 10 | 30218170 | 0.007522 | 0.39  | 10 | 30218170 | 0.002303 | 4.41E-13 |
| rs2497833 | T | G | A | 0.015532 | 0.004026 | 0.61808  | 0.39097  | 10 | 17983041 | 0.006976 | 0.56  | 10 | 17983041 | 0.001889 | 2.12E-16 |
| rs2522051 | A | G | G | -0.01332 | 0.019594 | 0.502337 | 0.25072  | 5  | 1.32E+08 | 0.007915 | 0.013 | 5  | 1.32E+08 | 0.001758 | 3.64E-14 |
| rs2561758 | T | C | C | -0.0187  | -0.04277 | 0.299754 | 0.006004 | 5  | 1.74E+08 | 0.044591 | 0.34  | 5  | 1.74E+08 | 0.001926 | 3.00E-22 |
| rs257063  | C | T | T | 0.023319 | -0.00313 | 0.391786 | 0.370077 | 5  | 1.15E+08 | 0.007053 | 0.66  | 5  | 1.15E+08 | 0.001893 | 7.79E-35 |
| rs2665405 | C | T | T | -0.02291 | 0.002786 | 0.193448 | 0.586936 | 17 | 59797931 | 0.006866 | 0.68  | 17 | 59797931 | 0.002238 | 1.45E-24 |
| rs2710804 | G | A | A | 0.016766 | 0.009366 | 0.447647 | 0.224304 | 7  | 36044919 | 0.00829  | 0.26  | 7  | 36044919 | 0.001783 | 5.56E-21 |
| rs2732625 | T | C | C | -0.01195 | -0.02925 | 0.379026 | 0.007925 | 17 | 46255063 | 0.037689 | 0.44  | 17 | 46255063 | 0.001812 | 4.36E-11 |
| rs2734031 | A | C | G | 0.02132  | -0.01141 | 0.173155 | 0.332373 | 3  | 1.29E+08 | 0.007171 | 0.11  | 3  | 1.29E+08 | 0.002346 | 1.08E-19 |
| rs2807742 | T | C | C | -0.01284 | -0.00103 | 0.616525 | 0.914986 | 10 | 28492438 | 0.012074 | 0.93  | 10 | 28492438 | 0.001818 | 1.72E-12 |
| rs2853075 | T | C | C | 0.014036 | 0.020268 | 0.221856 | 0.011768 | 4  | 36310920 | 0.032006 | 0.53  | 4  | 36310920 | 0.002129 | 4.51E-11 |
| rs2861524 | A | T | T | 0.014448 | -0.00945 | 0.541795 | 0.207493 | 8  | 54538633 | 0.008471 | 0.26  | 8  | 54538633 | 0.001811 | 1.56E-15 |
| rs2867816 | A | G | C | -0.02866 | -0.00458 | 0.123048 | 0.301873 | 17 | 43020464 | 0.007289 | 0.53  | 17 | 43020464 | 0.002705 | 3.46E-26 |
| rs2875187 | C | T | T | 0.01549  | 0.014434 | 0.405612 | 0.043948 | 5  | 71009726 | 0.016459 | 0.38  | 5  | 71009726 | 0.001799 | 7.62E-18 |
| rs2900156 | A | G | G | 0.003019 | -0.01369 | 0.819349 | 0.335255 | 6  | 32479564 | 0.007214 | 0.058 | 6  | 32479564 | 0.002564 | 0.23902  |
| rs2910686 | A | G | G | 0.020977 | -0.00065 | 0.451223 | 0.586455 | 5  | 96916885 | 0.006931 | 0.93  | 5  | 96916885 | 0.001879 | 6.43E-29 |
| rs2915607 | G | A | A | 0.014639 | 0.00883  | 0.223519 | 0.774015 | 8  | 30422400 | 0.008012 | 0.27  | 8  | 30422400 | 0.002106 | 3.75E-12 |
| rs2980869 | C | T | T | -0.03078 | 0.001348 | 0.588603 | 0.480788 | 8  | 1.25E+08 | 0.006828 | 0.84  | 8  | 1.25E+08 | 0.001799 | 1.39E-65 |
| rs303753  | C | G | G | 0.032329 | -0.0085  | 0.254004 | 0.086215 | 18 | 23494958 | 0.011967 | 0.48  | 18 | 23494958 | 0.002069 | 5.55E-55 |
| rs305083  | A | G | G | -0.02598 | -0.00021 | 0.363379 | 0.92243  | 16 | 85902272 | 0.012695 | 0.99  | 16 | 85902272 | 0.001891 | 6.38E-43 |
| rs325925  | T | C | G | 0.020949 | 0.009731 | 0.329652 | 0.365274 | 1  | 1.11E+08 | 0.007174 | 0.17  | 1  | 1.11E+08 | 0.00187  | 4.13E-29 |
| rs328491  | G | A | A | 0.019537 | -0.00953 | 0.587716 | 0.095341 | 20 | 57394436 | 0.01126  | 0.4   | 20 | 57394436 | 0.002067 | 3.53E-21 |
| rs334563  | T | C | T | -0.01318 | 0.000718 | 0.537064 | 0.429395 | 3  | 1.2E+08  | 0.006866 | 0.92  | 3  | 1.2E+08  | 0.001856 | 1.28E-12 |
| rs3395198 | G | A | A | 0.011519 | -0.00542 | 0.727271 | 0.899616 | 7  | 73615107 | 0.011373 | 0.63  | 7  | 73615107 | 0.002119 | 5.58E-08 |
| rs3411241 | C | T | T | -0.01333 | 0.00495  | 0.322135 | 0.117675 | 14 | 69374185 | 0.010434 | 0.64  | 14 | 69374185 | 0.001907 | 2.82E-12 |
| rs3418057 | T | C | C | -0.0168  | 0.011366 | 0.684378 | 0.041547 | 1  | 2.21E+08 | 0.016939 | 0.5   | 1  | 2.21E+08 | 0.001953 | 8.46E-18 |
| rs342242  | T | C | C | -0.014   | 0.00805  | 0.493707 | 0.748079 | 7  | 1.07E+08 | 0.007785 | 0.3   | 7  | 1.07E+08 | 0.001983 | 1.75E-12 |
| rs354707  | T | C | A | 0.037239 | -0.0139  | 0.120884 | 0.247839 | 2  | 1.43E+08 | 0.007831 | 0.076 | 2  | 1.43E+08 | 0.002765 | 2.60E-41 |
| rs3573424 | A | G | G | -0.0202  | 0.003648 | 0.211722 | 0.550432 | 4  | 712911   | 0.007046 | 0.6   | 4  | 712911   | 0.002163 | 1.07E-20 |
| rs3578917 | C | T | A | 0.032447 | 0.005516 | 0.415272 | 0.395773 | 2  | 1.02E+08 | 0.006858 | 0.42  | 2  | 1.02E+08 | 0.001803 | 2.20E-72 |
| rs3735485 | T | C | C | -0.04818 | -0.00833 | 0.027913 | 0.099424 | 7  | 44969742 | 0.01152  | 0.47  | 7  | 44969742 | 0.005333 | 1.76E-19 |
| rs3747869 | G | A | G | -0.02243 | 0.004457 | 0.057626 | 0.191162 | 10 | 71760875 | 0.008657 | 0.61  | 10 | 71760875 | 0.003802 | 3.72E-09 |
| rs3749440 | C | T | T | 0.019927 | -0.00433 | 0.707003 | 0.4061   | 3  | 1.84E+08 | 0.006958 | 0.53  | 3  | 1.84E+08 | 0.002029 | 9.93E-23 |
| rs3760232 | G | A | A | 0.036785 | -0.00613 | 0.043508 | 0.774736 | 17 | 2111555  | 0.008197 | 0.45  | 17 | 2111555  | 0.005186 | 1.37E-12 |
| rs3777755 | G | C | C | 0.001321 | 0.001674 | 0.471473 | 0.229827 | 6  | 12159466 | 0.008042 | 0.84  | 6  | 12159466 | 0.001799 | 0.462856 |
| rs3781454 | T | C | C | -0.01437 | 0.008515 | 0.711635 | 0.668348 | 10 | 1.25E+08 | 0.0072   | 0.24  | 10 | 1.25E+08 | 0.001961 | 2.50E-13 |
| rs3795445 | T | C | T | -0.01421 | 0.011738 | 0.620645 | 0.178915 | 1  | 2.27E+08 | 0.008846 | 0.18  | 1  | 2.27E+08 | 0.001832 | 9.42E-15 |
| rs3825761 | T | C | C | -0.01986 | 0.002552 | 0.682661 | 0.45365  | 14 | 1.05E+08 | 0.006833 | 0.71  | 14 | 1.05E+08 | 0.001937 | 1.25E-24 |
| rs385893  | T | C | C | 0.022558 | -0.00899 | 0.368348 | 0.229827 | 9  | 4763176  | 0.00796  | 0.26  | 9  | 4763176  | 0.001855 | 5.41E-34 |

|           |   |   |   |   |          |          |          |          |    |          |          |        |    |          |          |           |
|-----------|---|---|---|---|----------|----------|----------|----------|----|----------|----------|--------|----|----------|----------|-----------|
| rs386243  | A | G | A | G | 0.022892 | -0.00853 | 0.259541 | 0.665466 | 19 | 48624233 | 0.007063 | 0.23   | 19 | 48624233 | 0.002237 | 1.50E-24  |
| rs38859   | C | T | C | T | 0.02183  | -0.0045  | 0.549433 | 0.528098 | 7  | 1.17E+08 | 0.006811 | 0.51   | 7  | 1.17E+08 | 0.001826 | 6.91E-33  |
| rs3917932 | G | A | G | C | 0.01612  | 0.007055 | 0.556407 | 0.389529 | 1  | 36478315 | 0.007002 | 0.31   | 1  | 36478315 | 0.001802 | 3.98E-19  |
| rs3923776 | C | G | C | G | -0.01884 | -0.00354 | 0.406605 | 0.044669 | 9  | 1.36E+08 | 0.016369 | 0.83   | 9  | 1.36E+08 | 0.001797 | 1.09E-25  |
| rs3931    | G | C | G | A | 0.015762 | -0.00464 | 0.407347 | 0.259126 | 2  | 1.69E+08 | 0.007782 | 0.55   | 2  | 1.69E+08 | 0.001845 | 1.38E-17  |
| rs4006418 | G | C | T | C | 0.019701 | -0.0012  | 0.281002 | 0.200288 | 18 | 22130372 | 0.008654 | 0.89   | 18 | 22130372 | 0.001986 | 3.72E-23  |
| rs410876  | G | A | G | T | 0.013989 | -0.00427 | 0.391446 | 0.373199 | 9  | 1.34E+08 | 0.007229 | 0.56   | 9  | 1.34E+08 | 0.001804 | 9.17E-15  |
| rs427044  | C | T | C | T | -0.01318 | -0.00689 | 0.451253 | 0.854227 | 7  | 66043558 | 0.009615 | 0.47   | 7  | 66043558 | 0.001838 | 8.01E-13  |
| rs4375747 | C | T | C | T | -0.1954  | -0.07469 | 0.994909 | 0.995677 | 18 | 76359827 | 0.049713 | 0.13   | 18 | 76359827 | 0.014302 | 1.87E-42  |
| rs4420029 | C | T | C | T | -0.02119 | -0.0162  | 0.27746  | 0.049232 | 1  | 45959828 | 0.015851 | 0.31   | 1  | 45959828 | 0.001981 | 1.14E-26  |
| rs445     | A | G | A | G | -0.0227  | -0.00889 | 0.243782 | 0.332133 | 7  | 92779056 | 0.007238 | 0.22   | 7  | 92779056 | 0.002072 | 6.88E-28  |
| rs4660482 | C | A | T | C | -0.03958 | -0.00503 | 0.315243 | 0.260086 | 1  | 40892982 | 0.007824 | 0.52   | 1  | 40892982 | 0.001952 | 2.49E-91  |
| rs4707609 | A | C | G | A | 0.023381 | 0.004051 | 0.189166 | 0.14049  | 6  | 90236760 | 0.00974  | 0.68   | 6  | 90236760 | 0.00228  | 1.19E-24  |
| rs4721668 | C | T | C | T | 0.022706 | 0.101548 | 0.541006 | 0.988713 | 7  | 17902783 | 0.031972 | 0.0015 | 7  | 17902783 | 0.001816 | 7.94E-36  |
| rs4734879 | C | G | G | A | 0.025412 | -0.00763 | 0.709931 | 0.427474 | 8  | 1.06E+08 | 0.006899 | 0.27   | 8  | 1.06E+08 | 0.001973 | 6.54E-38  |
| rs4751697 | C | T | C | T | 0.013417 | 0.002819 | 0.531504 | 0.377522 | 10 | 1.19E+08 | 0.007067 | 0.69   | 10 | 1.19E+08 | 0.001771 | 3.69E-14  |
| rs4757956 | G | A | G | A | -0.03341 | 0.009884 | 0.727739 | 0.28146  | 11 | 12855119 | 0.007439 | 0.18   | 11 | 12855119 | 0.002139 | 6.16E-55  |
| rs4760    | A | T | G | A | -0.04794 | 0.010138 | 0.02143  | 0.016811 | 19 | 43648948 | 0.026562 | 0.7    | 19 | 43648948 | 0.007111 | 1.63E-11  |
| rs4761234 | T | C | T | C | -0.03172 | 0.009745 | 0.233005 | 0.568924 | 12 | 69338325 | 0.006916 | 0.16   | 12 | 69338325 | 0.002251 | 4.93E-45  |
| rs4812447 | G | A | G | A | 0.013936 | 0.006796 | 0.178084 | 0.439001 | 20 | 40643980 | 0.006893 | 0.32   | 20 | 40643980 | 0.002373 | 4.40E-09  |
| rs4843080 | T | C | T | C | 0.030045 | 0.009882 | 0.169334 | 0.583333 | 15 | 85603872 | 0.007086 | 0.16   | 15 | 85603872 | 0.00252  | 1.00E-32  |
| rs4844622 | T | G | A | G | -0.0134  | 0.054889 | 0.656565 | 0.014169 | 1  | 2.08E+08 | 0.027818 | 0.048  | 1  | 2.08E+08 | 0.001908 | 2.21E-12  |
| rs4903580 | C | T | C | T | -0.01505 | 0.006348 | 0.413598 | 0.899616 | 14 | 77384635 | 0.011079 | 0.57   | 14 | 77384635 | 0.001815 | 1.17E-16  |
| rs4917628 | A | G | A | G | -0.02646 | 0.011651 | 0.199223 | 0.230307 | 10 | 1.12E+08 | 0.008191 | 0.15   | 10 | 1.12E+08 | 0.002224 | 1.30E-32  |
| rs4970764 | T | C | G | C | -0.04769 | 0.005981 | 0.033652 | 0.422911 | 1  | 1.09E+08 | 0.006862 | 0.38   | 1  | 1.09E+08 | 0.004904 | 2.53E-22  |
| rs547364  | A | G | G | C | 0.014138 | -0.01074 | 0.802686 | 0.498559 | 1  | 1.08E+08 | 0.006845 | 0.12   | 1  | 1.08E+08 | 0.002209 | 1.60E-10  |
| rs551125  | T | A | C | T | 0.024618 | 0.004998 | 0.782567 | 0.166667 | 12 | 1.21E+08 | 0.009088 | 0.58   | 12 | 1.21E+08 | 0.002162 | 5.37E-30  |
| rs5572910 | A | G | A | G | 0.014763 | 0.003237 | 0.636898 | 0.809318 | 2  | 2.32E+08 | 0.008566 | 0.71   | 2  | 2.32E+08 | 0.001827 | 6.79E-16  |
| rs5608240 | G | A | G | A | 0.033833 | 0.004333 | 0.168666 | 0.660183 | 3  | 1.57E+08 | 0.007139 | 0.54   | 3  | 1.57E+08 | 0.002397 | 3.35E-45  |
| rs5617956 | C | T | C | T | 0.159817 | 0.010115 | 0.002635 | 0.605427 | 7  | 1.3E+08  | 0.006995 | 0.15   | 7  | 1.3E+08  | 0.022367 | 9.36E-13  |
| rs5618886 | G | C | C | T | -0.02291 | -0.00416 | 0.223998 | 0.382565 | 1  | 2.47E+08 | 0.006971 | 0.55   | 1  | 2.47E+08 | 0.002151 | 1.84E-26  |
| rs5636531 | G | T | C | T | -0.01378 | 0.007979 | 0.544809 | 0.263208 | 2  | 1.28E+08 | 0.007713 | 0.3    | 2  | 1.28E+08 | 0.001767 | 6.60E-15  |
| rs5638817 | C | T | A | C | 0.013865 | -0.00633 | 0.550276 | 0.184918 | 7  | 28684757 | 0.008702 | 0.47   | 7  | 28684757 | 0.00187  | 1.28E-13  |
| rs5640811 | C | A | G | A | 0.01566  | 0.003827 | 0.626156 | 0.126801 | 19 | 19682736 | 0.010273 | 0.71   | 19 | 19682736 | 0.002011 | 7.29E-15  |
| rs5692122 | A | G | A | G | 0.015628 | 0.010021 | 0.555076 | 0.148175 | 4  | 53485997 | 0.009452 | 0.29   | 4  | 53485997 | 0.001892 | 1.56E-16  |
| rs571497  | T | C | T | C | 0.546141 | -0.03028 | 0.976761 | 0.009606 | 19 | 7762944  | 0.035329 | 0.39   | 19 | 7762944  | 0.012303 | 1.00E-200 |
| rs5746451 | A | G | A | G | -0.02414 | 0.004407 | 0.449277 | 0.180596 | 22 | 17643254 | 0.008861 | 0.62   | 22 | 17643254 | 0.001817 | 3.12E-40  |
| rs5763096 | T | C | T | C | -0.03865 | -0.00554 | 0.582725 | 0.43708  | 22 | 29247432 | 0.00694  | 0.42   | 22 | 29247432 | 0.00184  | 6.92E-98  |
| rs5988287 | G | A | G | A | 0.015492 | 0.005725 | 0.376575 | 0.746398 | 7  | 76009103 | 0.007999 | 0.47   | 7  | 76009103 | 0.001856 | 7.36E-17  |
| rs618145  | G | C | A | C | -0.013   | 0.011111 | 0.649558 | 0.079011 | 9  | 76704644 | 0.012365 | 0.37   | 9  | 76704644 | 0.001905 | 9.14E-12  |
| rs6188983 | C | T | C | T | -0.03073 | -0.00703 | 0.042119 | 0.98391  | 11 | 10281374 | 0.026753 | 0.79   | 11 | 10281374 | 0.004691 | 5.91E-11  |
| rs619450  | G | T | A | G | -0.01813 | -0.00707 | 0.518771 | 0.225024 | 20 | 2914144  | 0.008242 | 0.39   | 20 | 2914144  | 0.001969 | 3.61E-20  |
| rs6229295 | T | C | T | A | 0.018023 | -0.00379 | 0.485318 | 0.14121  | 3  | 1.32E+08 | 0.010044 | 0.71   | 3  | 1.32E+08 | 0.001821 | 4.64E-23  |

|             |   |   |   |          |          |          |          |    |          |          |       |    |          |          |           |
|-------------|---|---|---|----------|----------|----------|----------|----|----------|----------|-------|----|----------|----------|-----------|
| rs6251850 A | G | A | G | 0.022025 | 0.002235 | 0.533263 | 0.209414 | 8  | 78260489 | 0.008326 | 0.79  | 8  | 78260489 | 0.001775 | 2.53E-35  |
| rs643177 G  | A | G | A | 0.014556 | 0.005172 | 0.246309 | 0.883285 | 6  | 1.38E+08 | 0.010718 | 0.63  | 6  | 1.38E+08 | 0.002054 | 1.43E-12  |
| rs6432335 C | T | A | C | 0.01575  | 0.006282 | 0.335405 | 0.182997 | 2  | 12788845 | 0.008608 | 0.47  | 2  | 12788845 | 0.001867 | 3.41E-17  |
| rs6442061 C | T | C | A | -0.01889 | 0.004189 | 0.185112 | 0.330451 | 3  | 47162293 | 0.007377 | 0.57  | 3  | 47162293 | 0.002561 | 1.71E-13  |
| rs6510834 G | C | T | C | 0.076409 | -0.01567 | 0.989933 | 0.225504 | 19 | 5008662  | 0.008254 | 0.058 | 19 | 5008662  | 0.009741 | 4.57E-15  |
| rs6651495 G | A | G | A | -0.01572 | 0.005143 | 0.273388 | 0.591739 | 5  | 69315756 | 0.006951 | 0.46  | 5  | 69315756 | 0.00211  | 9.67E-14  |
| rs665723 G  | C | T | C | 0.018947 | -0.00334 | 0.458171 | 0.114073 | 6  | 7138831  | 0.010452 | 0.75  | 6  | 7138831  | 0.00176  | 5.40E-27  |
| rs6674304 C | G | C | T | -0.01676 | 0.000441 | 0.52083  | 0.114553 | 1  | 1.16E+08 | 0.010551 | 0.97  | 1  | 1.16E+08 | 0.001791 | 8.66E-21  |
| rs6690335 T | A | G | A | 0.010367 | 0.007126 | 0.495688 | 0.383766 | 1  | 38826036 | 0.00702  | 0.31  | 1  | 38826036 | 0.001774 | 5.21E-09  |
| rs6714557 T | C | T | C | -0.02579 | 0.002998 | 0.323156 | 0.225504 | 5  | 1.51E+08 | 0.008208 | 0.71  | 5  | 1.51E+08 | 0.002083 | 3.59E-35  |
| rs6717590 A | G | A | G | 0.023086 | 0.008532 | 0.108547 | 0.197166 | 15 | 1.01E+08 | 0.008699 | 0.33  | 15 | 1.01E+08 | 0.00283  | 3.60E-16  |
| rs6734238 G | A | G | A | 0.036704 | -0.00838 | 0.067113 | 0.103987 | 2  | 1.13E+08 | 0.010904 | 0.44  | 2  | 1.13E+08 | 0.00354  | 3.69E-25  |
| rs6734347 A | C | A | C | 0.058058 | 0.010439 | 0.029522 | 0.033381 | 7  | 7979532  | 0.019438 | 0.59  | 7  | 7979532  | 0.005437 | 1.39E-26  |
| rs6779340 T | C | C | G | -0.04022 | -0.0093  | 0.032142 | 0.035783 | 3  | 58047974 | 0.017195 | 0.59  | 3  | 58047974 | 0.00537  | 7.27E-14  |
| rs6859727 T | C | T | C | -0.03754 | 0.023217 | 0.065119 | 0.039625 | 5  | 72446795 | 0.017612 | 0.19  | 5  | 72446795 | 0.003831 | 1.21E-22  |
| rs6905891 G | A | G | A | -0.03551 | 0.017989 | 0.044393 | 0.866475 | 6  | 43791452 | 0.010009 | 0.072 | 6  | 43791452 | 0.004846 | 2.42E-13  |
| rs6985508 A | G | A | G | 0.048573 | 0.014968 | 0.065789 | 0.457733 | 8  | 1.41E+08 | 0.006742 | 0.026 | 8  | 1.41E+08 | 0.003549 | 1.38E-42  |
| rs704984 T  | C | G | T | -0.01417 | 0.012594 | 0.296734 | 0.177474 | 1  | 1.46E+08 | 0.009027 | 0.16  | 1  | 1.46E+08 | 0.002065 | 7.11E-12  |
| rs7210990 T | C | T | G | -0.02207 | 0.013484 | 0.693963 | 0.116955 | 17 | 16267450 | 0.010537 | 0.2   | 17 | 16267450 | 0.001929 | 2.93E-30  |
| rs7217986 T | C | T | C | -0.03801 | -0.02563 | 0.193304 | 0.946206 | 17 | 77373496 | 0.014355 | 0.074 | 17 | 77373496 | 0.002233 | 6.57E-65  |
| rs7272605 T | C | T | C | -0.02004 | -0.00454 | 0.109516 | 0.104947 | 15 | 41978076 | 0.011003 | 0.68  | 15 | 41978076 | 0.002813 | 1.09E-12  |
| rs7275491 T | G | A | G | -0.02238 | 0.000171 | 0.171532 | 0.207733 | 9  | 1.1E+08  | 0.008431 | 0.98  | 9  | 1.1E+08  | 0.002502 | 4.04E-19  |
| rs7275928 C | T | C | T | -0.05243 | 0.001157 | 0.874243 | 0.180596 | 9  | 1.24E+08 | 0.008875 | 0.9   | 9  | 1.24E+08 | 0.002769 | 6.36E-80  |
| rs7279086 T | C | T | C | 0.014685 | 0.004525 | 0.444088 | 0.912584 | 10 | 44384812 | 0.012174 | 0.71  | 10 | 44384812 | 0.001783 | 1.87E-16  |
| rs7280331 A | G | A | G | -0.02909 | 0.004634 | 0.8186   | 0.0622   | 16 | 89300741 | 0.013978 | 0.74  | 16 | 89300741 | 0.002329 | 9.04E-36  |
| rs738408 C  | A | A | G | 0.063318 | 0.00364  | 0.983351 | 0.352546 | 22 | 43928850 | 0.007073 | 0.61  | 22 | 43928850 | 0.010425 | 1.29E-09  |
| rs7426631 C | G | G | T | -0.02947 | -0.00032 | 0.177471 | 0.174352 | 2  | 1.36E+08 | 0.008795 | 0.97  | 2  | 1.36E+08 | 0.002462 | 5.68E-33  |
| rs7462171 A | C | T | C | 0.015969 | -0.00184 | 0.445235 | 0.119837 | 7  | 1.38E+08 | 0.010397 | 0.86  | 7  | 1.38E+08 | 0.001857 | 8.64E-18  |
| rs7496362 T | C | G | C | 0.013419 | 0.001298 | 0.283854 | 0.23487  | 15 | 65466536 | 0.007945 | 0.87  | 15 | 65466536 | 0.00195  | 6.09E-12  |
| rs749780 A  | T | C | A | -0.01699 | 0.0089   | 0.753765 | 0.452209 | 17 | 74703245 | 0.006907 | 0.2   | 17 | 74703245 | 0.002319 | 2.49E-13  |
| rs7536608 C | T | T | G | -0.0287  | -0.00618 | 0.592435 | 0.026657 | 1  | 2.24E+08 | 0.021211 | 0.77  | 1  | 2.24E+08 | 0.001907 | 3.79E-51  |
| rs7537229 C | T | C | T | -0.02773 | -0.02581 | 0.469695 | 0.044428 | 1  | 56440602 | 0.016861 | 0.13  | 1  | 56440602 | 0.001761 | 7.68E-56  |
| rs7547562 C | T | C | G | -0.02338 | 0.007669 | 0.675233 | 0.3439   | 2  | 54560455 | 0.007029 | 0.28  | 2  | 54560455 | 0.001938 | 1.81E-33  |
| rs7572922 G | A | G | A | 0.022615 | 0.010379 | 0.658793 | 0.789625 | 2  | 65425022 | 0.00815  | 0.2   | 2  | 65425022 | 0.001889 | 5.36E-33  |
| rs7626444 G | A | G | C | 0.016596 | -0.007   | 0.123403 | 0.251441 | 3  | 1.97E+08 | 0.008011 | 0.38  | 3  | 1.97E+08 | 0.00268  | 6.12E-10  |
| rs7679673 C | T | G | T | 0.013008 | -0.00413 | 0.421299 | 0.211335 | 4  | 1.05E+08 | 0.008279 | 0.62  | 4  | 1.05E+08 | 0.001932 | 1.71E-11  |
| rs7724386 A | G | C | A | -0.03669 | -0.00535 | 0.157187 | 0.450288 | 5  | 1.77E+08 | 0.006848 | 0.43  | 5  | 1.77E+08 | 0.002622 | 1.98E-44  |
| rs7776857 C | T | C | A | 0.021973 | 0.011041 | 0.063137 | 0.016571 | 7  | 22715149 | 0.025282 | 0.66  | 7  | 22715149 | 0.003658 | 1.95E-09  |
| rs7781509 A | C | T | C | -0.08747 | 0.010302 | 0.013295 | 0.325648 | 7  | 47325075 | 0.007254 | 0.16  | 7  | 47325075 | 0.008263 | 3.71E-26  |
| rs7803075 A | G | A | G | -0.0123  | 0.014918 | 0.586998 | 0.869356 | 7  | 1.31E+08 | 0.009942 | 0.13  | 7  | 1.31E+08 | 0.001833 | 2.01E-11  |
| rs7807030 G | A | G | T | 0.016578 | -0.00572 | 0.63433  | 0.038905 | 2  | 43628011 | 0.017638 | 0.75  | 2  | 43628011 | 0.001898 | 2.55E-18  |
| rs7817850 T | A | G | A | 0.060858 | 0.007444 | 0.192342 | 0.071326 | 17 | 19984410 | 0.013208 | 0.57  | 17 | 19984410 | 0.002239 | 1.21E-162 |
| rs7846314 T | C | A | T | -0.0143  | -0.00661 | 0.546042 | 0.136407 | 8  | 60738272 | 0.009799 | 0.5   | 8  | 60738272 | 0.001834 | 6.62E-15  |

|           |   |   |   |          |          |          |          |          |          |          |          |       |          |          |          |          |
|-----------|---|---|---|----------|----------|----------|----------|----------|----------|----------|----------|-------|----------|----------|----------|----------|
| rs7873858 | A | G | G | -0.02103 | -0.02163 | 0.135031 | 0.036023 | 13       | 42269494 | 0.017993 | 0.23     | 13    | 42269494 | 0.002573 | 3.16E-16 |          |
| rs789858  | A | C | A | G        | -0.03546 | -0.00155 | 0.422238 | 0.244476 | 3        | 1.95E+08 | 0.007886 | 0.84  | 3        | 1.95E+08 | 0.001844 | 2.41E-82 |
| rs796007  | A | G | A | G        | 0.014661 | 0.002016 | 0.242227 | 0.267291 | 9        | 83962626 | 0.007817 | 0.8   | 9        | 83962626 | 0.002083 | 2.02E-12 |
| rs8004096 | T | C | C | A        | 0.01253  | -0.01215 | 0.451298 | 0.404419 | 14       | 81234738 | 0.007001 | 0.083 | 14       | 81234738 | 0.001776 | 1.77E-12 |
| rs8013915 | G | T | G | A        | -0.02156 | 0.007711 | 0.564288 | 0.014409 | 20       | 10746012 | 0.029002 | 0.79  | 20       | 10746012 | 0.001955 | 3.02E-28 |
| rs8020004 | A | G | A | G        | 0.01269  | 0.000972 | 0.577901 | 0.159222 | 1        | 42958261 | 0.009421 | 0.92  | 1        | 42958261 | 0.001892 | 2.05E-11 |
| rs878664  | A | G | A | G        | -0.01897 | -0.07394 | 0.257495 | 0.005283 | 18       | 62447188 | 0.047428 | 0.12  | 18       | 62447188 | 0.002011 | 4.27E-21 |
| rs9131    | A | C | A | G        | 0.015797 | -0.00568 | 0.690295 | 0.316763 | 4        | 74097332 | 0.007246 | 0.43  | 4        | 74097332 | 0.00197  | 1.11E-15 |
| rs915125  | A | G | A | G        | 0.02478  | 0.00613  | 0.912761 | 0.334054 | 6        | 81753659 | 0.007346 | 0.4   | 6        | 81753659 | 0.00334  | 1.22E-13 |
| rs9287604 | A | G | C | G        | -0.01713 | 0.010002 | 0.563703 | 0.309318 | 2        | 2.37E+08 | 0.007437 | 0.18  | 2        | 2.37E+08 | 0.001859 | 3.34E-20 |
| rs9390460 | A | G | A | G        | -0.02263 | 0.000239 | 0.173173 | 0.693564 | 6        | 1.47E+08 | 0.007319 | 0.97  | 6        | 1.47E+08 | 0.00235  | 6.32E-22 |
| rs9394283 | A | G | T | A        | -0.0044  | 0.005804 | 0.397436 | 0.310759 | 6        | 35221859 | 0.007352 | 0.43  | 6        | 35221859 | 0.001836 | 0.01653  |
| rs9402685 | T | C | T | C        | 0.022336 | -0.00369 | 0.187163 | 0.793708 | 6        | 1.35E+08 | 0.008388 | 0.66  | 6        | 1.35E+08 | 0.002285 | 1.55E-22 |
| rs9749453 | T | G | C | T        | -0.09681 | -0.00324 | 0.979626 | 0.236071 | 19       | 11276185 | 0.008123 | 0.69  | 19       | 11276185 | 0.00704  | 5.60E-43 |
| rs9773718 | C | T | C | T        | 0.014759 | -0.00372 | 0.432619 | 0.814121 | 9        | 1.33E+08 | 0.008722 | 0.67  | 9        | 1.33E+08 | 0.001817 | 4.78E-16 |
| rs9804265 | G | C | C | A        | -0.01524 | 0.000427 | 0.290385 | 0.045389 | 10       | 24925121 | 0.016322 | 0.98  | 10       | 24925121 | 0.002    | 2.63E-14 |
| rs9905106 | C | T | C | T        | 0.02018  | -0.00899 | 0.761459 | 0.46878  | 17       | 1470224  | 0.006682 | 0.18  | 17       | 1470224  | 0.00208  | 3.10E-22 |
| rs9970896 | C | T | T | A        | 0.018342 | -0.01319 | 0.171157 | 0.025696 | 1        | 2.36E+08 | 0.021555 | 0.54  | 1        | 2.36E+08 | 0.00238  | 1.35E-14 |
| rs9977672 | C | T | C | T        | 0.022798 | -0.00674 | 0.622184 | 0.832133 | 21       | 39091357 | 0.009079 | 0.46  | 21       | 39091357 | 0.001853 | 9.37E-35 |

Supplementary Table 2n. List of SNPs for Vitamin D and their effects on TEWL

| SNP         | effect_alle | other_alle | effect_alle | other_alle | beta.VitD | beta.TEWL | eaf.VitD | eaf.TEWL | chr.TEWL | pos.TEWL | se.TEWL  | pval.TEWL | chr.VitD | pos.VitD  | se.VitD  | pval.VitD |
|-------------|-------------|------------|-------------|------------|-----------|-----------|----------|----------|----------|----------|----------|-----------|----------|-----------|----------|-----------|
| chr1:1550:G | T           | G          | T           | T          | 0.016904  | 0.026789  | 0.733745 | 0.928194 | 1        | 1.55E+08 | 0.013223 | 0.043     | 1        | 154994978 | 0.00229  | 1.57E-13  |
| chr1:2207:A | G           | A          | G           | G          | 0.014498  | -0.00336  | 0.315487 | 0.226465 | 1        | 2.21E+08 | 0.00806  | 0.68      | 1        | 220972343 | 0.002152 | 1.60E-11  |
| chr1:2301:C | T           | C          | T           | T          | -0.01747  | -0.00091  | 0.199128 | 0.688761 | 1        | 2.3E+08  | 0.007285 | 0.9       | 1        | 230303512 | 0.002509 | 3.37E-12  |
| chr1:4137:C | T           | C          | T           | T          | 0.013438  | -0.00461  | 0.433767 | 0.615034 | 1        | 41370013 | 0.00701  | 0.51      | 1        | 41835685  | 0.002025 | 3.25E-11  |
| chr12:975:G | T           | G          | T           | T          | 0.022014  | 0.005789  | 0.929281 | 0.830451 | 12       | 97588923 | 0.009219 | 0.53      | 12       | 97982701  | 0.00388  | 1.40E-08  |
| chr14:100:G | C           | G          | C           | C          | -0.01175  | 0.005567  | 0.326561 | 0.947406 | 14       | 1.01E+08 | 0.014032 | 0.69      | 14       | 101176212 | 0.002132 | 3.52E-08  |
| chr14:390:G | C           | G          | C           | C          | 0.037944  | 0.008267  | 0.176673 | 0.336695 | 14       | 39086981 | 0.00739  | 0.26      | 14       | 39556185  | 0.00261  | 6.84E-48  |
| chr15:583:T | C           | T          | C           | C          | 0.028378  | -0.00075  | 0.644772 | 0.580692 | 15       | 58387979 | 0.006845 | 0.91      | 15       | 58680178  | 0.002087 | 4.14E-42  |
| chr15:584:C | T           | C          | T           | T          | 0.033844  | -0.01157  | 0.784797 | 0.646254 | 15       | 58431476 | 0.007076 | 0.1       | 15       | 58723675  | 0.002423 | 2.54E-44  |
| chr16:118:T | TG          | G          | A           | A          | -0.01371  | 0.006785  | 0.726827 | 0.384246 | 16       | 11814919 | 0.00698  | 0.33      | 16       | 11906659  | 0.002253 | 1.15E-09  |
| chr16:569:C | T           | C          | T           | T          | 0.013859  | -0.00043  | 0.676894 | 0.836936 | 16       | 56960616 | 0.009319 | 0.96      | 16       | 56994528  | 0.002246 | 6.85E-10  |
| chr18:496:T | A           | T          | A           | A          | 0.019288  | 0.000734  | 0.154667 | 0.245917 | 18       | 49617853 | 0.007841 | 0.93      | 18       | 47144223  | 0.002778 | 3.85E-12  |
| chr19:358:C | T           | C          | T           | T          | 0.012475  | 0.002104  | 0.688405 | 0.458934 | 19       | 35851310 | 0.006743 | 0.75      | 19       | 36342212  | 0.00215  | 6.57E-09  |
| chr19:449:A | G           | A          | G           | G          | 0.015846  | -0.01093  | 0.384386 | 0.573487 | 19       | 44918620 | 0.006787 | 0.11      | 19       | 45421877  | 0.002098 | 4.29E-14  |
| chr2:6293:G | A           | G          | A           | A          | 0.011447  | -0.00146  | 0.471877 | 0.434198 | 2        | 62939244 | 0.007006 | 0.84      | 2        | 63166379  | 0.001996 | 9.81E-09  |
| chr4:9931:T | C           | T          | C           | C          | 0.046667  | -0.00391  | 0.024889 | 0.665466 | 4        | 99318162 | 0.006684 | 0.56      | 4        | 100239319 | 0.006374 | 2.45E-13  |
| chr5:8864:T | C           | T          | C           | C          | -0.01321  | -0.00461  | 0.290469 | 0.680355 | 5        | 88644208 | 0.007124 | 0.52      | 5        | 87940026  | 0.002198 | 1.82E-09  |
| chr6:1316:G | A           | G          | A           | A          | 0.023362  | -0.00183  | 0.834778 | 0.676033 | 6        | 1.32E+08 | 0.007337 | 0.8       | 6        | 131924689 | 0.002683 | 3.07E-18  |
| chr6:6079:C | T           | C          | T           | T          | -0.01176  | 5.56E-05  | 0.488637 | 0.563881 | 6        | 60799829 | 0.006885 | 0.99      | 6        | 57767576  | 0.002001 | 4.21E-09  |
| chr7:1049:C | T           | C          | T           | T          | 0.011683  | -0.00089  | 0.537368 | 0.128482 | 7        | 1.05E+08 | 0.009371 | 0.92      | 7        | 104618318 | 0.002038 | 9.85E-09  |
| chr8:1175:A | G           | A          | G           | G          | -0.01489  | -0.00658  | 0.416395 | 0.029059 | 8        | 11754356 | 0.019714 | 0.74      | 8        | 11611865  | 0.002036 | 2.63E-13  |
| chr8:2603:G | A           | G          | A           | A          | -0.01495  | 0.012938  | 0.747064 | 0.666186 | 8        | 26035403 | 0.007165 | 0.071     | 8        | 25892919  | 0.0023   | 8.14E-11  |
| chr8:5848:A | G           | A          | G           | G          | -0.01231  | -0.00838  | 0.334478 | 0.244236 | 8        | 58480714 | 0.007882 | 0.29      | 8        | 59393273  | 0.002115 | 5.91E-09  |
| rs1008588   | T           | C          | T           | C          | 0.014558  | 0.010177  | 0.717815 | 0.918588 | 7        | 21538342 | 0.012378 | 0.41      | 7        | 21577960  | 0.002238 | 7.85E-11  |
| rs1038165   | C           | T          | C           | T          | -0.01206  | -0.00087  | 0.416651 | 0.486071 | 12       | 68272160 | 0.006758 | 0.9       | 12       | 68665940  | 0.002018 | 2.31E-09  |
| rs1040196   | A           | AG         | G           | A          | -0.04179  | 0.003581  | 0.926847 | 0.088857 | 19       | 19296909 | 0.012039 | 0.77      | 19       | 19393890  | 0.003833 | 1.13E-27  |
| rs10426     | G           | A          | G           | A          | -0.0252   | -0.01654  | 0.786567 | 0.849664 | 19       | 51014542 | 0.009714 | 0.089     | 19       | 51517798  | 0.002431 | 3.53E-25  |
| rs1045408   | C           | T          | C           | T          | 0.013531  | 0.000217  | 0.715178 | 0.566523 | 17       | 42583623 | 0.006928 | 0.97      | 17       | 40735641  | 0.002207 | 8.71E-10  |
| rs1047891   | C           | A          | C           | A          | 0.015214  | 0.005686  | 0.684179 | 0.834054 | 2        | 2.11E+08 | 0.009281 | 0.54      | 2        | 211540507 | 0.002141 | 1.18E-12  |
| rs1085999   | T           | C          | T           | C          | 0.043773  | -0.00765  | 0.417366 | 0.527858 | 12       | 95981904 | 0.006862 | 0.26      | 12       | 96375682  | 0.002082 | 3.76E-98  |
| rs1088771   | C           | T          | C           | T          | 0.01117   | 0.008481  | 0.471787 | 0.055235 | 10       | 80282868 | 0.014727 | 0.56      | 10       | 82042624  | 0.001998 | 2.28E-08  |
| rs1090841   | G           | A          | G           | A          | 0.012127  | -0.00366  | 0.510067 | 0.467339 | 1        | 1.55E+08 | 0.00677  | 0.59      | 1        | 154567699 | 0.001994 | 1.18E-09  |
| rs1090846   | C           | T          | C           | T          | -0.0201   | 0.010491  | 0.732668 | 0.352305 | 1        | 1.55E+08 | 0.007015 | 0.13      | 1        | 155389688 | 0.002292 | 1.79E-18  |
| rs1107617   | A           | G          | A           | G          | -0.0177   | 0.005412  | 0.821642 | 0.864793 | 16       | 56972466 | 0.010159 | 0.59      | 16       | 57006378  | 0.002748 | 1.17E-10  |
| rs1110836   | A           | G          | A           | G          | -0.01442  | -0.01038  | 0.393855 | 0.500961 | 12       | 95992360 | 0.006923 | 0.13      | 12       | 96386138  | 0.002154 | 2.15E-11  |
| rs1112718   | T           | C          | T           | C          | -0.01136  | 0.002453  | 0.504205 | 0.661623 | 2        | 28658541 | 0.007159 | 0.73      | 2        | 28881407  | 0.002035 | 2.35E-08  |
| rs1118242   | T           | C          | T           | C          | 0.012535  | -0.0025   | 0.480005 | 0.819164 | 12       | 38132585 | 0.008855 | 0.78      | 12       | 38526387  | 0.001994 | 3.24E-10  |
| rs1126432   | G           | A          | G           | A          | 0.013028  | 0.012939  | 0.570235 | 0.162824 | 1        | 1.55E+08 | 0.009267 | 0.16      | 1        | 155087933 | 0.002049 | 2.03E-10  |
| rs1149605   | T           | C          | T           | C          | -0.02308  | -0.01534  | 0.829603 | 0.643132 | 11       | 76774172 | 0.007059 | 0.03      | 11       | 76485216  | 0.002662 | 4.28E-18  |
| rs1154246   | G           | A          | G           | A          | 0.023866  | -0.01536  | 0.865656 | 0.982229 | 16       | 82000205 | 0.025183 | 0.54      | 16       | 82033810  | 0.002919 | 2.90E-16  |
| rs11606     | C           | G          | C           | G          | -0.01227  | 0.000287  | 0.574838 | 0.785062 | 19       | 54154365 | 0.008249 | 0.97      | 19       | 54658102  | 0.002051 | 2.21E-09  |
| rs1173289   | G           | A          | G           | A          | 0.016005  | 0.006897  | 0.701209 | 0.691402 | 4        | 87366841 | 0.00741  | 0.35      | 4        | 88287993  | 0.002174 | 1.79E-13  |

|             |    |   |   |          |           |          |          |    |          |          |        |    |           |          |           |
|-------------|----|---|---|----------|-----------|----------|----------|----|----------|----------|--------|----|-----------|----------|-----------|
| rs1205676 T | G  | T | G | 0.025414 | 0.005599  | 0.417091 | 0.353506 | 8  | 1.16E+08 | 0.007006 | 0.42   | 8  | 116988527 | 0.002048 | 2.28E-35  |
| rs1231726 A | G  | A | G | 0.020897 | -0.00524  | 0.848996 | 0.567723 | 12 | 21199607 | 0.00684  | 0.44   | 12 | 21352541  | 0.002785 | 6.21E-14  |
| rs1260326 T | C  | T | C | -0.02088 | -0.00318  | 0.393435 | 0.461335 | 2  | 27508073 | 0.006816 | 0.64   | 2  | 27730940  | 0.002038 | 1.24E-24  |
| rs1279471 G | A  | G | A | 0.112807 | 0.004545  | 0.578197 | 0.629443 | 11 | 14892029 | 0.007061 | 0.52   | 11 | 14913575  | 0.002056 | 1.00E-200 |
| rs1280325 A | G  | A | G | -0.06733 | 0.015547  | 0.223268 | 0.652978 | 11 | 71421822 | 0.007174 | 0.03   | 11 | 71132868  | 0.003899 | 8.13E-67  |
| rs1310426 G | A  | G | A | -0.02019 | -0.01378  | 0.743062 | 0.992075 | 4  | 69482372 | 0.036665 | 0.71   | 4  | 70348090  | 0.002387 | 2.70E-17  |
| rs1328405 T | C  | T | C | -0.01757 | -0.00309  | 0.882273 | 0.933718 | 9  | 1.05E+08 | 0.013816 | 0.82   | 9  | 107669073 | 0.003134 | 2.08E-08  |
| rs1352846 A | G  | A | G | 0.195884 | -0.00508  | 0.708567 | 0.751921 | 4  | 71752058 | 0.007772 | 0.51   | 4  | 72617775  | 0.002322 | 1.00E-200 |
| rs1421589 G | A  | G | A | -0.02549 | -0.04087  | 0.885392 | 0.982229 | 19 | 11079858 | 0.026209 | 0.12   | 19 | 11190534  | 0.003146 | 5.43E-16  |
| rs1660839 G | A  | G | A | -0.0151  | 0.004231  | 0.751151 | 0.657061 | 11 | 71383186 | 0.007238 | 0.56   | 11 | 71094232  | 0.002336 | 1.03E-10  |
| rs1721670 T | C  | T | C | 0.032453 | 0.033267  | 0.817316 | 0.945965 | 20 | 54115823 | 0.014906 | 0.026  | 20 | 52732362  | 0.00272  | 8.30E-33  |
| rs1933064 G | A  | G | A | -0.01512 | -0.0106   | 0.53039  | 0.15586  | 1  | 1.52E+08 | 0.009327 | 0.26   | 1  | 152301576 | 0.002106 | 6.93E-13  |
| rs2012736 C | A  | C | A | 0.048307 | 0.002059  | 0.919186 | 0.758405 | 2  | 2.34E+08 | 0.008084 | 0.8    | 2  | 234622379 | 0.003666 | 1.21E-39  |
| rs2037511 G | A  | G | A | -0.01808 | -0.00593  | 0.833993 | 0.888088 | 18 | 63698973 | 0.010959 | 0.59   | 18 | 61366207  | 0.00268  | 1.52E-11  |
| rs2074735 G | C  | G | C | -0.02773 | -0.01023  | 0.935904 | 0.627041 | 22 | 31139886 | 0.007094 | 0.15   | 22 | 31535872  | 0.004071 | 9.62E-12  |
| rs212100 T  | C  | T | C | 0.065857 | -0.03168  | 0.164001 | 0.010567 | 19 | 47873738 | 0.033111 | 0.34   | 19 | 48376995  | 0.002692 | 3.83E-132 |
| rs2131925 G | T  | G | T | 0.022894 | 0.008814  | 0.356375 | 0.2805   | 1  | 62560271 | 0.007588 | 0.25   | 1  | 63025942  | 0.002085 | 4.71E-28  |
| rs2229742 G | C  | G | C | 0.025148 | 0.016608  | 0.896549 | 0.991114 | 21 | 14966851 | 0.036709 | 0.65   | 21 | 16339172  | 0.003271 | 1.49E-14  |
| rs2346264 A | C  | A | C | 0.013883 | -0.01359  | 0.217315 | 0.057397 | 7  | 1.34E+08 | 0.014812 | 0.36   | 7  | 133536351 | 0.002436 | 1.21E-08  |
| rs2585442 C | G  | C | G | -0.02663 | 0.011977  | 0.759346 | 0.876801 | 20 | 54120584 | 0.010474 | 0.25   | 20 | 52737123  | 0.002438 | 8.95E-28  |
| rs2725371 A | G  | A | G | -0.01197 | 0.008406  | 0.302309 | 0.066523 | 8  | 30996517 | 0.012631 | 0.51   | 8  | 30854033  | 0.002183 | 4.17E-08  |
| rs2762943 T | G  | T | G | -0.04535 | -0.01454  | 0.076929 | 0.017531 | 20 | 54174247 | 0.026377 | 0.58   | 20 | 52790786  | 0.003775 | 3.07E-33  |
| rs2837596 A | AT | G | A | 0.034618 | 0.020248  | 0.52465  | 0.293708 | 4  | 69098070 | 0.007511 | 0.007  | 4  | 69968825  | 0.002058 | 1.71E-63  |
| rs2840795 C | T  | C | T | 0.013428 | -0.00475  | 0.756438 | 0.658021 | 6  | 32658571 | 0.007166 | 0.51   | 6  | 32623367  | 0.002325 | 7.69E-09  |
| rs2847500 G | A  | G | A | 0.022158 | -0.00847  | 0.876497 | 0.884006 | 11 | 1.2E+08  | 0.010637 | 0.43   | 11 | 120114421 | 0.003028 | 2.51E-13  |
| rs2952289 C | T  | C | T | -0.01772 | 0.001089  | 0.201968 | 0.472863 | 17 | 68468273 | 0.006774 | 0.87   | 17 | 66464414  | 0.002492 | 1.18E-12  |
| rs31612 T   | C  | T | C | 0.014528 | -0.00351  | 0.825562 | 0.370797 | 5  | 1.1E+08  | 0.006993 | 0.62   | 5  | 108996643 | 0.002649 | 4.16E-08  |
| rs325384 C  | T  | C | T | 0.014173 | 0.001626  | 0.715795 | 0.71806  | 15 | 99689556 | 0.007684 | 0.83   | 15 | 100229761 | 0.002218 | 1.66E-10  |
| rs3429076 C | G  | C | G | 0.038727 | 0.036401  | 0.970888 | 0.991835 | 8  | 9327669  | 0.038374 | 0.34   | 8  | 9185179   | 0.005976 | 9.16E-11  |
| rs3505790 A | T  | A | T | -0.01597 | -0.00382  | 0.568691 | 0.872238 | 4  | 68506364 | 0.010229 | 0.71   | 4  | 69372082  | 0.002096 | 2.62E-14  |
| rs3540843 C | T  | C | T | 0.021388 | 0.005484  | 0.657806 | 0.742075 | 1  | 17233700 | 0.007765 | 0.48   | 1  | 17560195  | 0.0021   | 2.34E-24  |
| rs3849374 G | C  | G | C | 0.016102 | 0.006347  | 0.821971 | 0.404659 | 2  | 1.01E+08 | 0.006965 | 0.36   | 2  | 101443397 | 0.002616 | 7.47E-10  |
| rs3925446 G | A  | G | A | -0.0158  | -0.00251  | 0.800871 | 0.653458 | 10 | 89735565 | 0.007165 | 0.73   | 10 | 91495322  | 0.002497 | 2.50E-10  |
| rs4327060 C | T  | C | T | 0.024675 | -0.01108  | 0.945604 | 0.588136 | 16 | 72773539 | 0.006881 | 0.11   | 16 | 72807438  | 0.004393 | 1.94E-08  |
| rs4364259 G | A  | G | A | -0.01591 | 0.013089  | 0.797852 | 0.896974 | 4  | 15890536 | 0.011261 | 0.25   | 4  | 15892159  | 0.002506 | 2.16E-10  |
| rs4418728 G | T  | G | T | -0.0112  | -0.00033  | 0.548312 | 0.182517 | 10 | 93079967 | 0.008723 | 0.97   | 10 | 94839724  | 0.002    | 2.17E-08  |
| rs4575545 G | A  | G | A | 0.015891 | -0.02025  | 0.695172 | 0.731268 | 16 | 79721549 | 0.007646 | 0.0081 | 16 | 79755446  | 0.002174 | 2.65E-13  |
| rs4616820 C | T  | C | T | 0.012286 | -0.0034   | 0.535046 | 0.465178 | 4  | 56879315 | 0.006828 | 0.62   | 4  | 57745481  | 0.002018 | 1.13E-09  |
| rs541041 G  | A  | G | A | 0.01623  | -0.03823  | 0.180761 | 0.01513  | 2  | 21072103 | 0.027456 | 0.16   | 2  | 21294975  | 0.002594 | 3.93E-10  |
| rs5582999 T | C  | T | C | 0.0188   | -0.00699  | 0.655996 | 0.972382 | 15 | 63498443 | 0.018949 | 0.71   | 15 | 63790642  | 0.002103 | 3.93E-19  |
| rs590215 C  | T  | C | T | 0.012876 | -0.00883  | 0.734073 | 0.818444 | 18 | 60236855 | 0.008895 | 0.32   | 18 | 57904088  | 0.002258 | 1.17E-08  |
| rs6003456 T | A  | T | A | 0.013214 | -9.75E-05 | 0.765336 | 0.967819 | 22 | 23013933 | 0.018396 | 1      | 22 | 23356100  | 0.002364 | 2.27E-08  |
| rs6123359 A | G  | A | G | -0.02506 | 0.002784  | 0.897775 | 0.48511  | 20 | 54098167 | 0.006692 | 0.68   | 20 | 52714706  | 0.003344 | 6.72E-14  |
| rs613808 A  | G  | A | G | -0.01566 | -0.00128  | 0.280007 | 0.726945 | 11 | 1.17E+08 | 0.007687 | 0.87   | 11 | 116710968 | 0.00245  | 1.63E-10  |

|             |       |   |   |          |           |          |          |    |          |          |      |    |           |          |          |
|-------------|-------|---|---|----------|-----------|----------|----------|----|----------|----------|------|----|-----------|----------|----------|
| rs6189138 T | G     | T | G | -0.013   | -0.0039   | 0.544079 | 0.829971 | 11 | 66312347 | 0.009007 | 0.67 | 11 | 66079818  | 0.002008 | 9.72E-11 |
| rs6200729 G | A     | G | A | 0.013341 | -0.00738  | 0.287463 | 0.628963 | 15 | 77419377 | 0.007126 | 0.3  | 15 | 77711719  | 0.0022   | 1.33E-09 |
| rs6550617 A | ATTTC | T | C | 0.012408 | 0.009179  | 0.28438  | 0.497598 | 3  | 18736344 | 0.00684  | 0.18 | 3  | 18794313  | 0.002216 | 2.14E-08 |
| rs6671730 G | A     | G | A | 0.014788 | -0.00669  | 0.565714 | 0.722863 | 1  | 2407700  | 0.007565 | 0.38 | 1  | 2339139   | 0.002011 | 1.92E-13 |
| rs6782190 G | A     | G | A | 0.018046 | 0.004798  | 0.352488 | 0.099904 | 3  | 85590522 | 0.010892 | 0.66 | 3  | 85639672  | 0.002089 | 5.74E-18 |
| rs705117 C  | T     | C | T | -0.03191 | -0.00383  | 0.1477   | 0.474304 | 4  | 71742398 | 0.006787 | 0.57 | 4  | 72608115  | 0.002923 | 9.62E-28 |
| rs7149014 T | C     | T | C | 0.013167 | -0.0067   | 0.370807 | 0.565802 | 14 | 29333705 | 0.006871 | 0.33 | 14 | 29802911  | 0.002086 | 2.77E-10 |
| rs727857 G  | A     | G | A | 0.01401  | -0.00827  | 0.388511 | 0.576369 | 2  | 58754832 | 0.006863 | 0.23 | 2  | 58981967  | 0.002062 | 1.08E-11 |
| rs7299762 C | A     | C | A | -0.02793 | 0.008828  | 0.915338 | 0.784822 | 11 | 75777009 | 0.008481 | 0.3  | 11 | 75488054  | 0.003582 | 6.39E-15 |
| rs7341359 T | C     | T | C | -0.0217  | -0.0154   | 0.926146 | 0.953891 | 12 | 1.11E+08 | 0.016502 | 0.35 | 12 | 111582630 | 0.003826 | 1.41E-08 |
| rs7412 C    | T     | C | T | -0.03033 | 0.012884  | 0.917927 | 0.918828 | 19 | 44908822 | 0.012548 | 0.3  | 19 | 45412079  | 0.003636 | 7.44E-17 |
| rs7528419 A | G     | A | G | -0.01974 | 0.003734  | 0.775329 | 0.914745 | 1  | 1.09E+08 | 0.01203  | 0.76 | 1  | 109817192 | 0.002387 | 1.36E-16 |
| rs7569755 G | A     | G | A | -0.01425 | 0.010088  | 0.70942  | 0.833573 | 2  | 1.18E+08 | 0.008959 | 0.26 | 2  | 118648261 | 0.002212 | 1.18E-10 |
| rs7574138 C | G     | C | G | 0.016153 | -7.03E-05 | 0.852362 | 0.614553 | 7  | 1.01E+08 | 0.00692  | 0.99 | 7  | 100809458 | 0.002826 | 1.09E-08 |
| rs7604788 C | T     | C | T | -0.0362  | 0.02464   | 0.966567 | 0.991595 | 2  | 20967152 | 0.036715 | 0.5  | 2  | 21190024  | 0.005567 | 7.88E-11 |
| rs7640441 T | TG    | T | G | -0.01384 | 0.000333  | 0.727909 | 0.216859 | 3  | 1.25E+08 | 0.008387 | 0.97 | 3  | 125125159 | 0.002268 | 1.04E-09 |
| rs7753286 C | T     | C | T | -0.02701 | 0.017905  | 0.945958 | 0.981748 | 10 | 86321681 | 0.025547 | 0.48 | 10 | 88081438  | 0.004402 | 8.49E-10 |
| rs7784802 A | T     | A | T | -0.01381 | 0.007011  | 0.639009 | 0.82781  | 7  | 64555001 | 0.00912  | 0.44 | 7  | 64015379  | 0.002072 | 2.63E-11 |
| rs7792461 G | A     | G | A | 0.016641 | -0.00901  | 0.806515 | 0.85951  | 16 | 20381010 | 0.010221 | 0.38 | 16 | 20392332  | 0.002552 | 6.96E-11 |
| rs7815119 A | C     | A | C | 0.016696 | -0.01913  | 0.871284 | 0.976705 | 6  | 25618779 | 0.022772 | 0.4  | 6  | 25619007  | 0.002974 | 1.98E-08 |
| rs7864991 T | A     | T | A | 0.021195 | 0.008628  | 0.893821 | 0.784582 | 4  | 3480486  | 0.008482 | 0.31 | 4  | 3482213   | 0.003252 | 7.17E-11 |
| rs8091117 C | A     | C | A | 0.026363 | 0.001136  | 0.934702 | 0.926753 | 18 | 31339831 | 0.013264 | 0.93 | 18 | 28919794  | 0.004029 | 6.00E-11 |
| rs8113404 C | T     | C | T | -0.0127  | -0.0141   | 0.695414 | 0.939241 | 19 | 52562326 | 0.014226 | 0.32 | 19 | 53065579  | 0.002172 | 4.92E-09 |
| rs9490317 T | C     | T | C | -0.01105 | -0.00122  | 0.554106 | 0.615514 | 6  | 1.22E+08 | 0.006994 | 0.86 | 6  | 121859499 | 0.002012 | 3.96E-08 |
| rs964184 G  | C     | G | C | -0.03495 | 0.008342  | 0.131624 | 0.231988 | 11 | 1.17E+08 | 0.008313 | 0.32 | 11 | 116648917 | 0.003222 | 2.05E-27 |
| rs9861009 T | C     | T | C | -0.01402 | -0.00204  | 0.272485 | 0.211335 | 3  | 1.42E+08 | 0.008298 | 0.81 | 3  | 141654685 | 0.002253 | 4.87E-10 |
| rs9870992 C | T     | C | T | 0.016694 | -0.00094  | 0.860311 | 0.985831 | 3  | 84318463 | 0.028276 | 0.97 | 3  | 84440527  | 0.002879 | 6.70E-09 |



Supplementary Table 2o. List of SNPs for Atopic Dermatitis (AD) and their effects on TEWL

| SNP         | effect_allele | other_allele | effect_allele | other_allele | beta.AD  | beta.TEWL | eaf.TEWL | chr.TEWL | pos.TEWL | se.TEWL  | pval.TEWL | chr.AD | pos.AD   | se.AD    | pval.AD  |
|-------------|---------------|--------------|---------------|--------------|----------|-----------|----------|----------|----------|----------|-----------|--------|----------|----------|----------|
| chr11:363!T | C             | T            | C             | C            | 0.072571 | 0.0142    | 0.67123  | 11       | 36350084 | 0.007228 | 0.049     | 11     | 36350207 | 0.032928 | 8.70E-07 |
| chr11:657!G | A             | G            | A             | A            | 0.113329 | 0.00575   | 0.505764 | 11       | 65791795 | 0.006852 | 0.4       | 11     | 65791795 | 0.027339 | 2.10E-19 |
| chr16:111!T | C             | T            | C             | C            | 0.083382 | -0.0016   | 0.674832 | 16       | 11135732 | 0.007127 | 0.82      | 16     | 11135732 | 0.022186 | 2.50E-11 |
| chr20:636!A | C             | A            | C             | C            | 0.105361 | 0.01616   | 0.365034 | 20       | 63671762 | 0.006794 | 0.017     | 20     | 63671762 | 0.034026 | 7.00E-13 |
| chr5:1326!C | T             | C            | T             | T            | 0.131028 | 0.001878  | 0.17219  | 5        | 1.33E+08 | 0.009043 | 0.84      | 5      | 1.33E+08 | 0.031476 | 4.00E-17 |
| rs1019960 G | A             | G            | A             | A            | 0.040822 | 0.015429  | 0.774736 | 2        | 8354967  | 0.00823  | 0.061     | 2      | 8354967  | 0.016029 | 4.00E-08 |
| rs1021423 T | C             | T            | C             | C            | 0.061875 | -0.00887  | 0.830211 | 5        | 35883632 | 0.009029 | 0.33      | 5      | 35883632 | 0.016372 | 2.90E-14 |
| rs1057258 C | T             | C            | T             | T            | 0.061875 | -0.00431  | 0.591258 | 2        | 2.33E+08 | 0.007087 | 0.54      | 2      | 2.33E+08 | 0.021714 | 1.70E-10 |
| rs1121114 A | G             | A            | G             | G            | 0.061875 | -0.01119  | 0.772334 | 2        | 70872975 | 0.007911 | 0.16      | 2      | 70872975 | 0.021714 | 9.40E-09 |
| rs1126561 A | G             | A            | G             | G            | 0.076961 | 0.001614  | 0.637848 | 1        | 1.54E+08 | 0.006963 | 0.82      | 1      | 1.54E+08 | 0.014176 | 6.10E-11 |
| rs2143950 T | C             | T            | C             | C            | 0.076961 | 0.004009  | 0.361431 | 14       | 35103151 | 0.007008 | 0.57      | 14     | 35103151 | 0.018899 | 1.80E-15 |
| rs2212434 T | C             | T            | C             | C            | 0.086178 | -0.00838  | 0.430596 | 11       | 76570549 | 0.006805 | 0.22      | 11     | 76570549 | 0.023301 | 4.60E-13 |
| rs2227483 T | A             | T            | A             | A            | 0.061875 | -0.00064  | 0.476225 | 12       | 68254396 | 0.00681  | 0.93      | 12     | 68254396 | 0.016198 | 6.70E-16 |
| rs2918307 G | A             | G            | A             | A            | 0.113329 | -0.00145  | 0.117915 | 19       | 8679458  | 0.01071  | 0.89      | 19     | 8679458  | 0.036459 | 4.60E-12 |
| rs2944542 G | C             | G            | C             | C            | 0.061875 | 0.00533   | 0.475024 | 10       | 62610240 | 0.006921 | 0.44      | 10     | 62610240 | 0.021714 | 1.20E-06 |
| rs6419573 T | C             | T            | C             | C            | 0.10436  | 0.009158  | 0.467819 | 2        | 1.02E+08 | 0.006871 | 0.18      | 2      | 1.02E+08 | 0.027585 | 1.50E-13 |
| rs6473227 C | A             | C            | A             | A            | 0.061875 | -0.01212  | 0.538184 | 8        | 80373657 | 0.006752 | 0.073     | 8      | 80373657 | 0.010856 | 2.20E-16 |
| rs6602364 G | C             | G            | C             | C            | 0.04879  | 0.011613  | 0.319164 | 10       | 5996890  | 0.007301 | 0.11      | 10     | 5996890  | 0.014648 | 1.30E-10 |
| rs7127307 T | C             | T            | C             | C            | 0.061875 | 0.002691  | 0.394092 | 11       | 1.28E+08 | 0.007122 | 0.71      | 11     | 1.28E+08 | 0.016372 | 1.50E-18 |
| rs7512552 C | T             | C            | T             | T            | 0.040822 | 0.00067   | 0.758405 | 1        | 1.5E+08  | 0.008049 | 0.93      | 1      | 1.5E+08  | 0.016029 | 5.40E-09 |
