# Supplementary material for: Investigating causal relationships between obesity and skin barrier function in a multi-ethnic Asian general population cohort
Source: PubMed Central journal article supplement (PMC10511308; doi:10.1038/s41366-023-01343-z), 2023-07-21
Supplement: 41366_2023_1343_MOESM7_ESM.pdf [file 41366_2023_1343_MOESM7_ESM.pdf]

**Supplementary Table 6: Body Mass Index (BMI) SNPs and annotated associations with possible confounders**

| snp        | trait                                                             | study   | pmid     | ancestry | year | beta     | se       | p        | n      | n_cases | n_controls | n_studies | unit      | dataset                           |
|------------|-------------------------------------------------------------------|---------|----------|----------|------|----------|----------|----------|--------|---------|------------|-----------|-----------|-----------------------------------|
| rs1000096  | Hayfever, allergic rhinitis or eczema                             | Neale B | UKBB     | European | 2017 | 0.007504 | 0.001057 | 1.23E-12 | 336782 | 77891   | 258891     | 1         | risk diff | Neale-B_UKBB_EUR_2017             |
| rs1000096  | No blood clot, bronchitis, emphysema, asthma, rhinitis, eczema o  | Neale B | UKBB     | European | 2017 | -0.00584 | 0.001171 | 6.21E-07 | 336782 | 228530  | 108252     | 1         | risk diff | Neale-B_UKBB_EUR_2017             |
| rs1000096  | Qualifications: college or university degree                      | Neale B | UKBB     | European | 2017 | 0.005623 | 0.001172 | 1.61E-06 | 334070 | 106305  | 227765     | 1         | risk diff | Neale-B_UKBB_EUR_2017             |
| rs10035289 | Pack years adult smoking as proportion of life span exposed to sn | Neale B | UKBB     | European | 2017 | 0.01954  | 0.004387 | 8.42E-06 | 101726 | 0       | 101726     | 1         | IVNT      | Neale-B_UKBB_EUR_2017             |
| rs1035010  | Diastolic blood pressure                                          | Neale B | UKBB     | European | 2017 | 0.01724  | 0.002815 | 9.07E-10 | 317756 | 0       | 317756     | 1         | IVNT      | Neale-B_UKBB_EUR_2017             |
| rs1035010  | Systolic blood pressure                                           | Neale B | UKBB     | European | 2017 | 0.01454  | 0.002813 | 2.35E-07 | 317754 | 0       | 317754     | 1         | IVNT      | Neale-B_UKBB_EUR_2017             |
| rs10733051 | Asthma                                                            | Neale B | UKBB     | European | 2017 | -0.00359 | 0.00078  | 4.06E-06 | 336782 | 38791   | 297991     | 1         | risk diff | Neale-B_UKBB_EUR_2017             |
| rs10733051 | Hayfever, allergic rhinitis or eczema                             | Neale B | UKBB     | European | 2017 | -0.00495 | 0.001029 | 1.47E-06 | 336782 | 77891   | 258891     | 1         | risk diff | Neale-B_UKBB_EUR_2017             |
| rs10733051 | No blood clot, bronchitis, emphysema, asthma, rhinitis, eczema o  | Neale B | UKBB     | European | 2017 | 0.005385 | 0.00114  | 2.31E-06 | 336782 | 228530  | 108252     | 1         | risk diff | Neale-B_UKBB_EUR_2017             |
| rs10733051 | Self-reported asthma                                              | Neale B | UKBB     | European | 2017 | -0.00348 | 0.000781 | 8.57E-06 | 337159 | 39049   | 298110     | 1         | risk diff | Neale-B_UKBB_EUR_2017             |
| rs10797115 | Qualifications: college or university degree                      | Neale B | UKBB     | European | 2017 | 0.006757 | 0.001146 | 3.69E-09 | 334070 | 106305  | 227765     | 1         | risk diff | Neale-B_UKBB_EUR_2017             |
| rs10734604 | Diastolic blood pressure                                          | Neale B | UKBB     | European | 2017 | 0.01655  | 0.003218 | 2.70E-07 | 317756 | 0       | 317756     | 1         | IVNT      | Neale-B_UKBB_EUR_2017             |
| rs10734604 | Self-reported hypertension                                        | Neale B | UKBB     | European | 2017 | 0.008266 | 0.001393 | 2.95E-09 | 337159 | 87690   | 249469     | 1         | risk diff | Neale-B_UKBB_EUR_2017             |
| rs10734604 | Systolic blood pressure                                           | Neale B | UKBB     | European | 2017 | 0.01748  | 0.003216 | 5.50E-08 | 317754 | 0       | 317754     | 1         | IVNT      | Neale-B_UKBB_EUR_2017             |
| rs10734604 | Vascular or heart problems diagnosed by doctor: high blood pres   | Neale B | UKBB     | European | 2017 | 0.008566 | 0.001412 | 1.31E-09 | 336683 | 91033   | 245650     | 1         | risk diff | Neale-B_UKBB_EUR_2017             |
| rs479971   | Past tobacco smoking                                              | Neale B | UKBB     | European | 2017 | 0.0182   | 0.003547 | 2.86E-07 | 310749 | 0       | 310749     | 1         | -         | Neale-B_UKBB_EUR_2017             |
| rs479971   | Treatment with blood pressure medication                          | Neale B | UKBB     | European | 2017 | -0.00633 | 0.00142  | 8.38E-06 | 180203 | 31488   | 148715     | 1         | risk diff | Neale-B_UKBB_EUR_2017             |
| rs10955841 | Qualifications: college or university degree                      | Neale B | UKBB     | European | 2017 | 0.006453 | 0.001213 | 1.03E-07 | 334070 | 106305  | 227765     | 1         | risk diff | Neale-B_UKBB_EUR_2017             |
| rs10955841 | Qualifications: none                                              | Neale B | UKBB     | European | 2017 | -0.00435 | 0.000983 | 9.77E-06 | 334070 | 57567   | 276503     | 1         | risk diff | Neale-B_UKBB_EUR_2017             |
| rs11030385 | Qualifications: college or university degree                      | Neale B | UKBB     | European | 2017 | 0.005289 | 0.001164 | 5.52E-06 | 334070 | 106305  | 227765     | 1         | risk diff | Neale-B_UKBB_EUR_2017             |
| rs11030385 | Wheeze or whistling in the chest in last year                     | Neale B | UKBB     | European | 2017 | -0.005   | 0.001017 | 9.04E-07 | 331257 | 68531   | 262726     | 1         | risk diff | Neale-B_UKBB_EUR_2017             |
| rs11030385 | Former smoker                                                     | TAG     | 20418890 | European | 2010 | 0.0738   | 0.0165   | 7.84E-06 | 41278  | 23969   | 17309      | 14        | log OR    | TAG_FORMER_EUR_2010               |
| rs11066301 | Diastolic blood pressure                                          | BPExome | 27618447 | Mixed    | 2016 | NA       | NA       | 4.49E-09 | 192763 | 0       | 192763     | 51        | INVT      | BPExome_DBP_Mixed_2016            |
| rs11066301 | Hypertension                                                      | BPExome | 27618447 | Mixed    | 2016 | NA       | NA       | 1.87E-08 | 183273 | 92652   | 90621      | 51        | log OR    | BPExome_Hypertension_Mixed_2016   |
| rs11066301 | Diastolic blood pressure                                          | ICBP    | 21909115 | European | 2011 | NA       | NA       | 6.59E-11 | 69395  | -       | -          | -         | -         | GRASP                             |
| rs11066301 | Systolic blood pressure                                           | ICBP    | 21909115 | European | 2011 | NA       | NA       | 4.94E-08 | 69395  | -       | -          | -         | -         | GRASP                             |
| rs11066301 | Diastolic blood pressure                                          | ICBP    | 21909115 | European | 2011 | NA       | NA       | 6.59E-11 | 69395  | 0       | 69395      | 29        | mmHg      | ICBP_DBP_EUR_2011                 |
| rs11066301 | Systolic blood pressure                                           | ICBP    | 21909115 | European | 2011 | NA       | NA       | 4.94E-08 | 69395  | 0       | 69395      | 29        | mmHg      | ICBP_SBP_EUR_2011                 |
| rs11066301 | Diastolic blood pressure                                          | Neale B | UKBB     | European | 2017 | -0.02776 | 0.002491 | 7.94E-29 | 317756 | 0       | 317756     | 1         | IVNT      | Neale-B_UKBB_EUR_2017             |
| rs11066301 | Doctor diagnosed hayfever or allergic rhinitis                    | Neale B | UKBB     | European | 2017 | 0.01018  | 0.002075 | 9.39E-07 | 83529  | 18934   | 64595      | 1         | risk diff | Neale-B_UKBB_EUR_2017             |
| rs11066301 | Ever smoked                                                       | Neale B | UKBB     | European | 2017 | -0.00554 | 0.001204 | 4.17E-06 | 336067 | 202585  | 133482     | 1         | risk diff | Neale-B_UKBB_EUR_2017             |
| rs11066301 | Hayfever, allergic rhinitis or eczema                             | Neale B | UKBB     | European | 2017 | 0.00682  | 0.001039 | 5.34E-11 | 336782 | 77891   | 258891     | 1         | risk diff | Neale-B_UKBB_EUR_2017             |
| rs11066301 | Illnesses of siblings: high blood pressure                        | Neale B | UKBB     | European | 2017 | -0.00526 | 0.001121 | 2.70E-06 | 262361 | 54270   | 208091     | 1         | risk diff | Neale-B_UKBB_EUR_2017             |
| rs11066301 | No blood clot, bronchitis, emphysema, asthma, rhinitis, eczema o  | Neale B | UKBB     | European | 2017 | -0.00585 | 0.001152 | 3.74E-07 | 336782 | 228530  | 108252     | 1         | risk diff | Neale-B_UKBB_EUR_2017             |
| rs11066301 | Past tobacco smoking                                              | Neale B | UKBB     | European | 2017 | 0.01753  | 0.003205 | 4.49E-08 | 310749 | 0       | 310749     | 1         | -         | Neale-B_UKBB_EUR_2017             |
| rs11066301 | Self-reported hypertension                                        | Neale B | UKBB     | European | 2017 | -0.00871 | 0.001079 | 6.77E-16 | 337159 | 87690   | 249469     | 1         | risk diff | Neale-B_UKBB_EUR_2017             |
| rs11066301 | Smoking status: previous                                          | Neale B | UKBB     | European | 2017 | -0.00626 | 0.001177 | 1.07E-07 | 336024 | 118419  | 217605     | 1         | risk diff | Neale-B_UKBB_EUR_2017             |
| rs11066301 | Systolic blood pressure                                           | Neale B | UKBB     | European | 2017 | -0.01728 | 0.00249  | 4.01E-12 | 317754 | 0       | 317754     | 1         | IVNT      | Neale-B_UKBB_EUR_2017             |
| rs11066301 | Treatment with blood pressure medication                          | Neale B | UKBB     | European | 2017 | -0.00761 | 0.00128  | 2.75E-09 | 180203 | 31488   | 148715     | 1         | risk diff | Neale-B_UKBB_EUR_2017             |
| rs11066301 | Vascular or heart problems diagnosed by doctor: high blood pres   | Neale B | UKBB     | European | 2017 | -0.00915 | 0.001094 | 6.09E-17 | 336683 | 91033   | 245650     | 1         | risk diff | Neale-B_UKBB_EUR_2017             |
| rs4321967  | Diastolic blood pressure                                          | Neale B | UKBB     | European | 2017 | 0.01651  | 0.002489 | 3.30E-11 | 317756 | 0       | 317756     | 1         | IVNT      | Neale-B_UKBB_EUR_2017             |
| rs4321967  | Self-reported hypertension                                        | Neale B | UKBB     | European | 2017 | 0.007122 | 0.001078 | 3.97E-11 | 337159 | 87690   | 249469     | 1         | risk diff | Neale-B_UKBB_EUR_2017             |
| rs4321967  | Systolic blood pressure                                           | Neale B | UKBB     | European | 2017 | 0.01787  | 0.002487 | 6.71E-13 | 317754 | 0       | 317754     | 1         | IVNT      | Neale-B_UKBB_EUR_2017             |
| rs4321967  | Treatment with blood pressure medication                          | Neale B | UKBB     | European | 2017 | 0.006239 | 0.001281 | 1.11E-06 | 180203 | 31488   | 148715     | 1         | risk diff | Neale-B_UKBB_EUR_2017             |
| rs4321967  | Vascular or heart problems diagnosed by doctor: high blood pres   | Neale B | UKBB     | European | 2017 | 0.007476 | 0.001093 | 7.97E-12 | 336683 | 91033   | 245650     | 1         | risk diff | Neale-B_UKBB_EUR_2017             |
| rs11259933 | Asthma                                                            | Neale B | UKBB     | European | 2017 | -0.00368 | 0.000779 | 2.34E-06 | 336782 | 38791   | 297991     | 1         | risk diff | Neale-B_UKBB_EUR_2017             |
| rs11259933 | Self-reported asthma                                              | Neale B | UKBB     | European | 2017 | -0.00379 | 0.00078  | 1.18E-06 | 337159 | 39049   | 298110     | 1         | risk diff | Neale-B_UKBB_EUR_2017             |
| rs11496125 | Systolic blood pressure                                           | Neale B | UKBB     | European | 2017 | -0.01152 | 0.0025   | 4.03E-06 | 317754 | 0       | 317754     | 1         | IVNT      | Neale-B_UKBB_EUR_2017             |
| rs11672660 | 2 hour glucose                                                    | MAGIC   | 20081857 | European | 2010 | NA       | NA       | 4.06E-06 | 15234  | -       | -          | -         | -         | GRASP                             |
| rs11672660 | 2 hour glucose tolerance test                                     | MAGIC   | 22885924 | European | 2012 | NA       | NA       | 2.72E-27 | 133010 | -       | -          | -         | -         | GRASP                             |
| rs11672660 | Fasting blood glucose                                             | MAGIC   | 22885924 | European | 2012 | NA       | NA       | 5.83E-09 | 133010 | -       | -          | -         | -         | GRASP                             |
| rs11672660 | 2 hour fasting glucose                                            | MAGIC   | 22885924 | European | 2012 | -0.12    | 0.014    | 2.40E-16 | 42854  | 0       | 42854      | 20        | mmol/l    | MAGIC_2HG-METABO_EUR_2012         |
| rs11672660 | 2 hour fasting glucose                                            | MAGIC   | 20081857 | European | 2010 | -0.15    | 0.032    | 4.06E-06 | 15234  | 0       | 15234      | 9         | mmol/l    | MAGIC_2HG_EUR_2010                |
| rs11672660 | Fasting glucose                                                   | MAGIC   | 22885924 | European | 2012 | 0.016    | 0.0028   | 5.83E-09 | 133010 | 0       | 133010     | 66        | mmol/l    | MAGIC_FG-METABO_EUR_2012          |
| rs11753081 | Type II diabetes                                                  | DIAGRAM | 26551672 | European | 2015 | 0.124    | 0.01623  | 3.50E-14 | 84780  | 27206   | 57574      | 23        | log OR    | DIAGRAM_T2D-METABO_EUR_2015       |
| rs11753081 | Type II diabetes adjusted for BMI                                 | DIAGRAM | 28566273 | European | 2017 | 0.2      | 0.019    | 4.60E-26 | 159208 | 26676   | 132532     | 18        | log OR    | DIAGRAM_T2D-adjusted-BMI_EUR_2017 |
| rs11753081 | Type II diabetes                                                  | DIAGRAM | 22885922 | European | 2012 | 0.207    | 0.02491  | 1.70E-17 | 63390  | 9580    | 53810      | 12        | log OR    | DIAGRAM_T2D_EUR_2012              |

|            |                                                                   |           |          |            |      |          |          |          |        |        |        |    |           |                           |
|------------|-------------------------------------------------------------------|-----------|----------|------------|------|----------|----------|----------|--------|--------|--------|----|-----------|---------------------------|
| rs11753081 | Type II diabetes                                                  | DIAGRAM   | 28566273 | European   | 2017 | 0.17     | 0.016    | 1.30E-27 | 159208 | 26676  | 132532 | 18 | log OR    | DIAGRAM_T2D_EUR_2017      |
| rs11753081 | Type II diabetes                                                  | DIAGRAM   | 24509480 | Mixed      | 2014 | 0.1484   | 0.01546  | 6.80E-23 | 110452 | 26488  | 83964  | 4  | log OR    | DIAGRAM_T2D_Mixed_2014    |
| rs11753081 | Glycosylated hemoglobin in nondiabetic subjects                   | Ryu J     | 22290723 | East Asian | 2012 | NA       | NA       | 1.61E-08 | 4275   | -      | -      | -  | -         | GRASP                     |
| rs11753081 | Type 2 diabetes                                                   | Cho YS    | 22158537 | Mixed      | 2011 | NA       | NA       | 4.47E-16 | 18817  | -      | -      | -  | -         | GRASP                     |
| rs11753081 | Type 2 diabetes                                                   | Imamura N | 22456796 | East Asian | 2012 | NA       | NA       | 6.52E-06 | 7541   | -      | -      | -  | -         | GRASP                     |
| rs11753081 | Fasting glucose                                                   | MAGIC     | 22885924 | European   | 2012 | 0.015    | 0.0028   | 2.27E-08 | 133010 | 0      | 133010 | 66 | mmol/l    | MAGIC_FG-METABO_EUR_2012  |
| rs11753081 | Diabetes diagnosed by doctor                                      | Neale B   | UKBB     | European   | 2017 | 0.007004 | 0.000687 | 1.97E-24 | 336473 | 16183  | 320290 | 1  | risk diff | Neale-B_UKBB_EUR_2017     |
| rs11753081 | Illnesses of father: diabetes                                     | Neale B   | UKBB     | European   | 2017 | 0.005092 | 0.000997 | 3.25E-07 | 293407 | 28197  | 265210 | 1  | risk diff | Neale-B_UKBB_EUR_2017     |
| rs11753081 | Illnesses of mother: diabetes                                     | Neale B   | UKBB     | European   | 2017 | 0.004668 | 0.00096  | 1.16E-06 | 309953 | 28875  | 281078 | 1  | risk diff | Neale-B_UKBB_EUR_2017     |
| rs11753081 | Self-reported diabetes                                            | Neale B   | UKBB     | European   | 2017 | 0.005398 | 0.000623 | 4.35E-18 | 337159 | 13243  | 323916 | 1  | risk diff | Neale-B_UKBB_EUR_2017     |
| rs11753081 | Self-reported type 2 diabetes                                     | Neale B   | UKBB     | European   | 2017 | 0.001317 | 0.000255 | 2.33E-07 | 337159 | 2133   | 335026 | 1  | risk diff | Neale-B_UKBB_EUR_2017     |
| rs11753081 | Treatment with gliclazide                                         | Neale B   | UKBB     | European   | 2017 | 0.001432 | 0.000292 | 9.19E-07 | 337159 | 2807   | 334352 | 1  | risk diff | Neale-B_UKBB_EUR_2017     |
| rs11855821 | Qualifications: college or university degree                      | Neale B   | UKBB     | European   | 2017 | 0.007124 | 0.001286 | 3.00E-08 | 334070 | 106305 | 227765 | 1  | risk diff | Neale-B_UKBB_EUR_2017     |
| rs11855821 | Qualifications: none                                              | Neale B   | UKBB     | European   | 2017 | -0.00569 | 0.001042 | 4.89E-08 | 334070 | 57567  | 276503 | 1  | risk diff | Neale-B_UKBB_EUR_2017     |
| rs11855821 | Years of educational attainment                                   | SSGAC     | 27225129 | European   | 2016 | 0.014    | 0.003    | 6.68E-07 | 328917 | 0      | 328917 | 64 | years     | SSGAC_EduYears_EUR_2016   |
| rs11889536 | Years of education                                                | SSGAC     | 23722424 | European   | 2013 | NA       | NA       | 9.13E-06 | 101069 | -      | -      | -  | -         | GRASP                     |
| rs11889536 | Years of educational attainment                                   | SSGAC     | 23722424 | European   | 2013 | -0.024   | 0.005    | 9.13E-06 | 101069 | 0      | 101069 | 42 | years     | SSGAC_EduYears_EUR_2013   |
| rs12042908 | Ever smoked                                                       | Neale B   | UKBB     | European   | 2017 | 0.006194 | 0.0012   | 2.42E-07 | 336067 | 202585 | 133482 | 1  | risk diff | Neale-B_UKBB_EUR_2017     |
| rs12042908 | Past tobacco smoking                                              | Neale B   | UKBB     | European   | 2017 | -0.01695 | 0.003196 | 1.14E-07 | 310749 | 0      | 310749 | 1  | -         | Neale-B_UKBB_EUR_2017     |
| rs10927006 | Exposure to tobacco smoke outside home                            | Neale B   | UKBB     | European   | 2017 | -0.01152 | 0.002101 | 4.14E-08 | 286550 | 0      | 286550 | 1  | -         | Neale-B_UKBB_EUR_2017     |
| rs10927006 | Qualifications: none                                              | Neale B   | UKBB     | European   | 2017 | -0.0061  | 0.001312 | 3.36E-06 | 334070 | 57567  | 276503 | 1  | risk diff | Neale-B_UKBB_EUR_2017     |
| rs12044597 | Systolic blood pressure                                           | Neale B   | UKBB     | European   | 2017 | 0.01232  | 0.002465 | 5.81E-07 | 317754 | 0      | 317754 | 1  | IVNT      | Neale-B_UKBB_EUR_2017     |
| rs12101393 | Qualifications: A levels or as levels or equivalent               | Neale B   | UKBB     | European   | 2017 | -0.006   | 0.001325 | 5.86E-06 | 334070 | 91710  | 242360 | 1  | risk diff | Neale-B_UKBB_EUR_2017     |
| rs12411886 | Systolic blood pressure                                           | ICBP      | 21909115 | European   | 2011 | NA       | NA       | 3.26E-09 | 69395  | -      | -      | -  | -         | GRASP                     |
| rs12411886 | Systolic blood pressure                                           | ICBP      | 21909115 | European   | 2011 | NA       | NA       | 3.26E-09 | 69395  | 0      | 69395  | 29 | mmHg      | ICBP_SBP_EUR_2011         |
| rs12411886 | Diastolic blood pressure                                          | Neale B   | UKBB     | European   | 2017 | -0.03529 | 0.004624 | 2.31E-14 | 317756 | 0      | 317756 | 1  | IVNT      | Neale-B_UKBB_EUR_2017     |
| rs12411886 | Illnesses of mother: high blood pressure                          | Neale B   | UKBB     | European   | 2017 | -0.01151 | 0.00218  | 1.30E-07 | 311681 | 94817  | 216864 | 1  | risk diff | Neale-B_UKBB_EUR_2017     |
| rs12411886 | Self-reported hypertension                                        | Neale B   | UKBB     | European   | 2017 | -0.01476 | 0.002002 | 1.67E-13 | 337159 | 87690  | 249469 | 1  | risk diff | Neale-B_UKBB_EUR_2017     |
| rs12411886 | Systolic blood pressure                                           | Neale B   | UKBB     | European   | 2017 | -0.04758 | 0.004621 | 7.43E-25 | 317754 | 0      | 317754 | 1  | IVNT      | Neale-B_UKBB_EUR_2017     |
| rs12411886 | Treatment with blood pressure medication                          | Neale B   | UKBB     | European   | 2017 | -0.01347 | 0.002387 | 1.67E-08 | 180203 | 31488  | 148715 | 1  | risk diff | Neale-B_UKBB_EUR_2017     |
| rs12411886 | Vascular or heart problems diagnosed by doctor: high blood pres   | Neale B   | UKBB     | European   | 2017 | -0.0154  | 0.00203  | 3.36E-14 | 336683 | 91033  | 245650 | 1  | risk diff | Neale-B_UKBB_EUR_2017     |
| rs12448738 | Diastolic blood pressure                                          | Neale B   | UKBB     | European   | 2017 | -0.01686 | 0.003626 | 3.35E-06 | 317756 | 0      | 317756 | 1  | IVNT      | Neale-B_UKBB_EUR_2017     |
| rs12593036 | Self-reported hypertension                                        | Neale B   | UKBB     | European   | 2017 | 0.006869 | 0.001161 | 3.26E-09 | 337159 | 87690  | 249469 | 1  | risk diff | Neale-B_UKBB_EUR_2017     |
| rs12593036 | Vascular or heart problems diagnosed by doctor: high blood pres   | Neale B   | UKBB     | European   | 2017 | 0.006902 | 0.001177 | 4.48E-09 | 336683 | 91033  | 245650 | 1  | risk diff | Neale-B_UKBB_EUR_2017     |
| rs12638746 | Smoking status: previous                                          | Neale B   | UKBB     | European   | 2017 | -0.00577 | 0.001237 | 3.13E-06 | 336024 | 118419 | 217605 | 1  | risk diff | Neale-B_UKBB_EUR_2017     |
| rs12680842 | Pack years adult smoking as proportion of life span exposed to sn | Neale B   | UKBB     | European   | 2017 | 0.02164  | 0.004729 | 4.75E-06 | 101726 | 0      | 101726 | 1  | IVNT      | Neale-B_UKBB_EUR_2017     |
| rs13246064 | Self-reported hypertension                                        | Neale B   | UKBB     | European   | 2017 | 0.005227 | 0.001084 | 1.41E-06 | 337159 | 87690  | 249469 | 1  | risk diff | Neale-B_UKBB_EUR_2017     |
| rs13246064 | Vascular or heart problems diagnosed by doctor: high blood pres   | Neale B   | UKBB     | European   | 2017 | 0.005848 | 0.001099 | 1.02E-07 | 336683 | 91033  | 245650 | 1  | risk diff | Neale-B_UKBB_EUR_2017     |
| rs13246064 | Wheeze or whistling in the chest in last year                     | Neale B   | UKBB     | European   | 2017 | 0.006413 | 0.001012 | 2.32E-10 | 331257 | 68531  | 262726 | 1  | risk diff | Neale-B_UKBB_EUR_2017     |
| rs12713433 | Hayfever, allergic rhinitis or eczema                             | Neale B   | UKBB     | European   | 2017 | 0.006565 | 0.001285 | 3.26E-07 | 336782 | 77891  | 258891 | 1  | risk diff | Neale-B_UKBB_EUR_2017     |
| rs12713433 | No blood clot, bronchitis, emphysema, asthma, rhinitis, eczema o  | Neale B   | UKBB     | European   | 2017 | -0.00632 | 0.001424 | 9.14E-06 | 336782 | 228530 | 108252 | 1  | risk diff | Neale-B_UKBB_EUR_2017     |
| rs12964689 | Qualifications: college or university degree                      | Neale B   | UKBB     | European   | 2017 | -0.00574 | 0.001138 | 4.57E-07 | 334070 | 106305 | 227765 | 1  | risk diff | Neale-B_UKBB_EUR_2017     |
| rs12964689 | Years of educational attainment                                   | SSGAC     | 27225129 | European   | 2016 | -0.014   | 0.002    | 1.19E-08 | 328917 | 0      | 328917 | 64 | years     | SSGAC_EduYears_EUR_2016   |
| rs13021737 | Diastolic blood pressure                                          | Neale B   | UKBB     | European   | 2017 | -0.016   | 0.003262 | 9.36E-07 | 317756 | 0      | 317756 | 1  | IVNT      | Neale-B_UKBB_EUR_2017     |
| rs13021737 | Past tobacco smoking                                              | Neale B   | UKBB     | European   | 2017 | 0.02006  | 0.004193 | 1.71E-06 | 310749 | 0      | 310749 | 1  | -         | Neale-B_UKBB_EUR_2017     |
| rs13021737 | Systolic blood pressure                                           | Neale B   | UKBB     | European   | 2017 | -0.01604 | 0.00326  | 8.66E-07 | 317754 | 0      | 317754 | 1  | IVNT      | Neale-B_UKBB_EUR_2017     |
| rs13227433 | Age completed full time education                                 | Neale B   | UKBB     | European   | 2017 | -0.01406 | 0.002755 | 3.32E-07 | 226899 | 0      | 226899 | 1  | -         | Neale-B_UKBB_EUR_2017     |
| rs13227433 | Self-reported hypertension                                        | Neale B   | UKBB     | European   | 2017 | 0.006764 | 0.001213 | 2.47E-08 | 337159 | 87690  | 249469 | 1  | risk diff | Neale-B_UKBB_EUR_2017     |
| rs13227433 | Vascular or heart problems diagnosed by doctor: high blood pres   | Neale B   | UKBB     | European   | 2017 | 0.006739 | 0.00123  | 4.24E-08 | 336683 | 91033  | 245650 | 1  | risk diff | Neale-B_UKBB_EUR_2017     |
| rs7794705  | Ever smoked                                                       | Neale B   | UKBB     | European   | 2017 | 0.008999 | 0.001644 | 4.41E-08 | 336067 | 202585 | 133482 | 1  | risk diff | Neale-B_UKBB_EUR_2017     |
| rs7794705  | Past tobacco smoking                                              | Neale B   | UKBB     | European   | 2017 | -0.02164 | 0.004372 | 7.47E-07 | 310749 | 0      | 310749 | 1  | -         | Neale-B_UKBB_EUR_2017     |
| rs13290794 | Diastolic blood pressure                                          | Neale B   | UKBB     | European   | 2017 | -0.01395 | 0.00255  | 4.49E-08 | 317756 | 0      | 317756 | 1  | IVNT      | Neale-B_UKBB_EUR_2017     |
| rs13290794 | Self-reported hypertension                                        | Neale B   | UKBB     | European   | 2017 | -0.00506 | 0.001104 | 4.60E-06 | 337159 | 87690  | 249469 | 1  | risk diff | Neale-B_UKBB_EUR_2017     |
| rs13290794 | Vascular or heart problems diagnosed by doctor: high blood pres   | Neale B   | UKBB     | European   | 2017 | -0.00506 | 0.001119 | 6.27E-06 | 336683 | 91033  | 245650 | 1  | risk diff | Neale-B_UKBB_EUR_2017     |
| rs13321566 | Qualifications: college or university degree                      | Neale B   | UKBB     | European   | 2017 | 0.006738 | 0.001516 | 8.78E-06 | 334070 | 106305 | 227765 | 1  | risk diff | Neale-B_UKBB_EUR_2017     |
| rs13321566 | Years of educational attainment in females                        | SSGAC     | 27225129 | European   | 2016 | 0.022    | 0.004    | 2.72E-07 | 181443 | 0      | 181443 | 62 | years     | SSGAC_EduYears-F_EUR_2016 |
| rs13321566 | Years of educational attainment                                   | SSGAC     | 27225129 | European   | 2016 | 0.016    | 0.003    | 1.30E-06 | 328917 | 0      | 328917 | 64 | years     | SSGAC_EduYears_EUR_2016   |
| rs62250504 | Ever smoked                                                       | Neale B   | UKBB     | European   | 2017 | -0.00769 | 0.001231 | 4.23E-10 | 336067 | 202585 | 133482 | 1  | risk diff | Neale-B_UKBB_EUR_2017     |
| rs62250504 | Past tobacco smoking                                              | Neale B   | UKBB     | European   | 2017 | 0.02201  | 0.003278 | 1.88E-11 | 310749 | 0      | 310749 | 1  | -         | Neale-B_UKBB_EUR_2017     |

|            |                                                                 |            |          |          |      |          |          |          |        |        |        |    |           |                                   |
|------------|-----------------------------------------------------------------|------------|----------|----------|------|----------|----------|----------|--------|--------|--------|----|-----------|-----------------------------------|
| rs62250504 | Qualifications: A levels or as levels or equivalent             | Neale B    | UKBB     | European | 2017 | 0.005926 | 0.001131 | 1.59E-07 | 334070 | 91710  | 242360 | 1  | risk diff | Neale-B_UKBB_EUR_2017             |
| rs62250504 | Qualifications: college or university degree                    | Neale B    | UKBB     | European | 2017 | 0.008009 | 0.001179 | 1.12E-11 | 334070 | 106305 | 227765 | 1  | risk diff | Neale-B_UKBB_EUR_2017             |
| rs62250504 | Smoking status: previous                                        | Neale B    | UKBB     | European | 2017 | -0.00641 | 0.001205 | 1.04E-07 | 336024 | 118419 | 217605 | 1  | risk diff | Neale-B_UKBB_EUR_2017             |
| rs62250504 | Wheeze or whistling in the chest in last year                   | Neale B    | UKBB     | European | 2017 | -0.00478 | 0.001031 | 3.54E-06 | 331257 | 68531  | 262726 | 1  | risk diff | Neale-B_UKBB_EUR_2017             |
| rs62250504 | Years of educational attainment in males                        | SSGAC      | 27225129 | European | 2016 | 0.018    | 0.004    | 3.33E-06 | 147474 | 0      | 147474 | 6  | years     | SSGAC_EduYears-M_EUR_2016         |
| rs62250504 | Years of educational attainment                                 | SSGAC      | 27225129 | European | 2016 | 0.013    | 0.003    | 4.27E-07 | 328917 | 0      | 328917 | 64 | years     | SSGAC_EduYears_EUR_2016           |
| rs1394     | Diastolic blood pressure                                        | Neale B    | UKBB     | European | 2017 | 0.01794  | 0.002554 | 2.18E-12 | 317756 | 0      | 317756 | 1  | IVNT      | Neale-B_UKBB_EUR_2017             |
| rs1394     | Self-reported hypertension                                      | Neale B    | UKBB     | European | 2017 | 0.006632 | 0.001106 | 2.04E-09 | 337159 | 87690  | 249469 | 1  | risk diff | Neale-B_UKBB_EUR_2017             |
| rs1394     | Systolic blood pressure                                         | Neale B    | UKBB     | European | 2017 | 0.01467  | 0.002553 | 9.19E-09 | 317754 | 0      | 317754 | 1  | IVNT      | Neale-B_UKBB_EUR_2017             |
| rs1394     | Vascular or heart problems diagnosed by doctor: high blood pres | Neale B    | UKBB     | European | 2017 | 0.007113 | 0.001122 | 2.28E-10 | 336683 | 91033  | 245650 | 1  | risk diff | Neale-B_UKBB_EUR_2017             |
| rs1399054  | Diastolic blood pressure                                        | Neale B    | UKBB     | European | 2017 | 0.01459  | 0.00305  | 1.71E-06 | 317756 | 0      | 317756 | 1  | IVNT      | Neale-B_UKBB_EUR_2017             |
| rs1405348  | Self-reported hypertension                                      | Neale B    | UKBB     | European | 2017 | 0.005287 | 0.001075 | 8.72E-07 | 337159 | 87690  | 249469 | 1  | risk diff | Neale-B_UKBB_EUR_2017             |
| rs1405348  | Systolic blood pressure                                         | Neale B    | UKBB     | European | 2017 | 0.01306  | 0.002481 | 1.41E-07 | 317754 | 0      | 317754 | 1  | IVNT      | Neale-B_UKBB_EUR_2017             |
| rs1405348  | Vascular or heart problems diagnosed by doctor: high blood pres | Neale B    | UKBB     | European | 2017 | 0.00563  | 0.00109  | 2.39E-07 | 336683 | 91033  | 245650 | 1  | risk diff | Neale-B_UKBB_EUR_2017             |
| rs1452075  | Type 2 diabetes                                                 | Zeggini E  | 18372903 | European | 2008 | NA       | NA       | 6.16E-07 | 10128  | -      | -      | -  | -         | GRASP                             |
| rs1452075  | Qualifications: college or university degree                    | Neale B    | UKBB     | European | 2017 | -0.00665 | 0.001292 | 2.59E-07 | 334070 | 106305 | 227765 | 1  | risk diff | Neale-B_UKBB_EUR_2017             |
| rs17056301 | Self-reported hypertension                                      | Neale B    | UKBB     | European | 2017 | 0.006794 | 0.001228 | 3.14E-08 | 337159 | 87690  | 249469 | 1  | risk diff | Neale-B_UKBB_EUR_2017             |
| rs17056301 | Systolic blood pressure                                         | Neale B    | UKBB     | European | 2017 | 0.01877  | 0.002833 | 3.46E-11 | 317754 | 0      | 317754 | 1  | IVNT      | Neale-B_UKBB_EUR_2017             |
| rs17056301 | Vascular or heart problems diagnosed by doctor: high blood pres | Neale B    | UKBB     | European | 2017 | 0.00678  | 0.001245 | 5.14E-08 | 336683 | 91033  | 245650 | 1  | risk diff | Neale-B_UKBB_EUR_2017             |
| rs17080319 | Qualifications: college or university degree                    | Neale B    | UKBB     | European | 2017 | 0.01066  | 0.001727 | 6.77E-10 | 334070 | 106305 | 227765 | 1  | risk diff | Neale-B_UKBB_EUR_2017             |
| rs17080319 | Years of educational attainment                                 | SSGAC      | 27225129 | European | 2016 | 0.021    | 0.004    | 1.01E-07 | 328917 | 0      | 328917 | 64 | years     | SSGAC_EduYears_EUR_2016           |
| rs3123794  | Systolic blood pressure                                         | Neale B    | UKBB     | European | 2017 | 0.01499  | 0.002466 | 1.22E-09 | 317754 | 0      | 317754 | 1  | IVNT      | Neale-B_UKBB_EUR_2017             |
| rs794369   | Age completed full time education                               | Neale B    | UKBB     | European | 2017 | 0.01143  | 0.002461 | 3.43E-06 | 226899 | 0      | 226899 | 1  | -         | Neale-B_UKBB_EUR_2017             |
| rs794369   | Diastolic blood pressure                                        | Neale B    | UKBB     | European | 2017 | -0.01285 | 0.002497 | 2.69E-07 | 317756 | 0      | 317756 | 1  | IVNT      | Neale-B_UKBB_EUR_2017             |
| rs794369   | Qualifications: A levels or as levels or equivalent             | Neale B    | UKBB     | European | 2017 | 0.00541  | 0.001107 | 1.03E-06 | 334070 | 91710  | 242360 | 1  | risk diff | Neale-B_UKBB_EUR_2017             |
| rs794369   | Qualifications: college or university degree                    | Neale B    | UKBB     | European | 2017 | 0.005756 | 0.001155 | 6.27E-07 | 334070 | 106305 | 227765 | 1  | risk diff | Neale-B_UKBB_EUR_2017             |
| rs794369   | Self-reported hypertension                                      | Neale B    | UKBB     | European | 2017 | -0.00488 | 0.001081 | 6.38E-06 | 337159 | 87690  | 249469 | 1  | risk diff | Neale-B_UKBB_EUR_2017             |
| rs794369   | Systolic blood pressure                                         | Neale B    | UKBB     | European | 2017 | -0.01209 | 0.002496 | 1.28E-06 | 317754 | 0      | 317754 | 1  | IVNT      | Neale-B_UKBB_EUR_2017             |
| rs794369   | Vascular or heart problems diagnosed by doctor: high blood pres | Neale B    | UKBB     | European | 2017 | -0.00494 | 0.001096 | 6.67E-06 | 336683 | 91033  | 245650 | 1  | risk diff | Neale-B_UKBB_EUR_2017             |
| rs17522122 | Age completed full time education                               | Neale B    | UKBB     | European | 2017 | 0.01107  | 0.002434 | 5.40E-06 | 226899 | 0      | 226899 | 1  | -         | Neale-B_UKBB_EUR_2017             |
| rs17681708 | Type II diabetes                                                | DIAGRAM    | 28566273 | European | 2017 | 0.064    | 0.013    | 5.60E-07 | 159208 | 26676  | 132532 | 18 | log OR    | DIAGRAM_T2D_EUR_2017              |
| rs17724992 | Systolic blood pressure                                         | Neale B    | UKBB     | European | 2017 | 0.01399  | 0.002787 | 5.15E-07 | 317754 | 0      | 317754 | 1  | IVNT      | Neale-B_UKBB_EUR_2017             |
| rs964782   | Current employment status: unable to work because of sickness   | Neale B    | UKBB     | European | 2017 | 0.002623 | 0.000522 | 5.07E-07 | 336252 | 12554  | 323698 | 1  | risk diff | Neale-B_UKBB_EUR_2017             |
| rs964782   | Diastolic blood pressure                                        | Neale B    | UKBB     | European | 2017 | 0.01285  | 0.002782 | 3.87E-06 | 317756 | 0      | 317756 | 1  | IVNT      | Neale-B_UKBB_EUR_2017             |
| rs964782   | Qualifications: college or university degree                    | Neale B    | UKBB     | European | 2017 | -0.00592 | 0.001287 | 4.29E-06 | 334070 | 106305 | 227765 | 1  | risk diff | Neale-B_UKBB_EUR_2017             |
| rs964782   | Qualifications: none                                            | Neale B    | UKBB     | European | 2017 | 0.005714 | 0.001044 | 4.40E-08 | 334070 | 57567  | 276503 | 1  | risk diff | Neale-B_UKBB_EUR_2017             |
| rs964782   | Systolic blood pressure                                         | Neale B    | UKBB     | European | 2017 | 0.02007  | 0.00278  | 5.25E-13 | 317754 | 0      | 317754 | 1  | IVNT      | Neale-B_UKBB_EUR_2017             |
| rs964782   | Vascular or heart problems diagnosed by doctor: high blood pres | Neale B    | UKBB     | European | 2017 | 0.005402 | 0.001222 | 9.78E-06 | 336683 | 91033  | 245650 | 1  | risk diff | Neale-B_UKBB_EUR_2017             |
| rs1899951  | Type II diabetes                                                | DIAGRAM    | 26551672 | European | 2015 | -0.09713 | 0.01851  | 1.40E-07 | 84780  | 27206  | 57574  | 23 | log OR    | DIAGRAM_T2D-METABO_EUR_2015       |
| rs1899951  | Type II diabetes adjusted for BMI                               | DIAGRAM    | 28566273 | European | 2017 | -0.14    | 0.022    | 7.30E-11 | 159208 | 26676  | 132532 | 18 | log OR    | DIAGRAM_T2D-adjusted-BMI_EUR_2017 |
| rs1899951  | Type II diabetes                                                | DIAGRAM    | 22885922 | European | 2012 | -0.1484  | 0.0241   | 3.80E-09 | 69033  | 12171  | 56862  | 12 | log OR    | DIAGRAM_T2D_EUR_2012              |
| rs1899951  | Type II diabetes                                                | DIAGRAM    | 28566273 | European | 2017 | -0.12    | 0.019    | 5.20E-11 | 159208 | 26676  | 132532 | 18 | log OR    | DIAGRAM_T2D_EUR_2017              |
| rs1899951  | Type II diabetes                                                | DIAGRAM    | 24509480 | Mixed    | 2014 | -0.131   | 0.02024  | 2.40E-10 | 110452 | 26488  | 83964  | 4  | log OR    | DIAGRAM_T2D_Mixed_2014            |
| rs1899951  | Type 2 diabetes                                                 | DIAGRAM    | 22885922 | Mixed    | 2012 | NA       | NA       | 3.70E-07 | 69033  | -      | -      | -  | -         | GRASP                             |
| rs1899951  | Diabetes diagnosed by doctor                                    | Neale B    | UKBB     | European | 2017 | -0.00412 | 0.000794 | 2.10E-07 | 336473 | 16183  | 320290 | 1  | risk diff | Neale-B_UKBB_EUR_2017             |
| rs1899951  | Illnesses of mother: diabetes                                   | Neale B    | UKBB     | European | 2017 | -0.00521 | 0.001111 | 2.79E-06 | 309953 | 28875  | 281078 | 1  | risk diff | Neale-B_UKBB_EUR_2017             |
| rs1899951  | Self-reported diabetes                                          | Neale B    | UKBB     | European | 2017 | -0.0036  | 0.00072  | 6.00E-07 | 337159 | 13243  | 323916 | 1  | risk diff | Neale-B_UKBB_EUR_2017             |
| rs200968   | Type 1 diabetes                                                 | Hakonarso  | 17632545 | European | 2007 | NA       | NA       | 3.33E-09 | 3105   | -      | -      | -  | -         | GRASP                             |
| rs200968   | Diastolic blood pressure                                        | Neale B    | UKBB     | European | 2017 | 0.02614  | 0.0031   | 3.45E-17 | 317756 | 0      | 317756 | 1  | IVNT      | Neale-B_UKBB_EUR_2017             |
| rs200968   | Treatment with insulin                                          | Neale B    | UKBB     | European | 2017 | -0.00194 | 0.000366 | 1.10E-07 | 180203 | 1377   | 178826 | 1  | risk diff | Neale-B_UKBB_EUR_2017             |
| rs200968   | Treatment with insulin product                                  | Neale B    | UKBB     | European | 2017 | -0.00217 | 0.000303 | 8.42E-13 | 337159 | 3319   | 333840 | 1  | risk diff | Neale-B_UKBB_EUR_2017             |
| rs200968   | Asthma                                                          | TAGC       | 29273806 | European | 2018 | -0.07503 | 0.0167   | 7.05E-06 | 127669 | 19954  | 107715 | 56 | log OR    | TAGC_Asthma_EUR_2018              |
| rs2075650  | Diabetes diagnosed by doctor                                    | Neale B    | UKBB     | European | 2017 | 0.003293 | 0.000736 | 7.72E-06 | 336473 | 16183  | 320290 | 1  | risk diff | Neale-B_UKBB_EUR_2017             |
| rs2075650  | Illnesses of mother: diabetes                                   | Neale B    | UKBB     | European | 2017 | 0.006424 | 0.001029 | 4.26E-10 | 309953 | 28875  | 281078 | 1  | risk diff | Neale-B_UKBB_EUR_2017             |
| rs2075650  | Treatment with atorvastatin                                     | Neale B    | UKBB     | European | 2017 | -0.00667 | 0.000588 | 7.86E-30 | 337159 | 10167  | 326992 | 1  | risk diff | Neale-B_UKBB_EUR_2017             |
| rs2075650  | Treatment with rosuvastatin                                     | Neale B    | UKBB     | European | 2017 | -0.00157 | 0.00027  | 6.10E-09 | 337159 | 2089   | 335070 | 1  | risk diff | Neale-B_UKBB_EUR_2017             |
| rs2075650  | Treatment with simvastatin                                      | Neale B    | UKBB     | European | 2017 | -0.01266 | 0.001089 | 3.02E-31 | 337159 | 38492  | 298667 | 1  | risk diff | Neale-B_UKBB_EUR_2017             |
| rs215632   | Nicotine dependence smoking cigarettes per day                  | Thorgeirss | 20418888 | European | 2010 | NA       | NA       | 1.90E-08 | 31266  | -      | -      | -  | -         | GRASP                             |
| rs215632   | Difficulty not smoking for 1 day                                | Neale B    | UKBB     | European | 2017 | 0.0398   | 0.008675 | 4.50E-06 | 23332  | 0      | 23332  | 1  | -         | Neale-B_UKBB_EUR_2017             |

|            |                                                                   |         |          |          |      |          |          |          |        |        |        |    |           |                             |
|------------|-------------------------------------------------------------------|---------|----------|----------|------|----------|----------|----------|--------|--------|--------|----|-----------|-----------------------------|
| rs215632   | Pack years adult smoking as proportion of life span exposed to sn | Neale B | UKBB     | European | 2017 | 0.02985  | 0.004545 | 5.14E-11 | 101726 | 0      | 101726 | 1  | IVNT      | Neale-B_UKBB_EUR_2017       |
| rs215632   | Pack years of smoking preview only                                | Neale B | UKBB     | European | 2017 | 0.02861  | 0.004529 | 2.70E-10 | 101726 | 0      | 101726 | 1  | IVNT      | Neale-B_UKBB_EUR_2017       |
| rs215632   | Qualifications: A levels or as levels or equivalent               | Neale B | UKBB     | European | 2017 | -0.00573 | 0.001134 | 4.39E-07 | 334070 | 91710  | 242360 | 1  | risk diff | Neale-B_UKBB_EUR_2017       |
| rs215632   | Qualifications: college or university degree                      | Neale B | UKBB     | European | 2017 | -0.00658 | 0.001183 | 2.64E-08 | 334070 | 106305 | 227765 | 1  | risk diff | Neale-B_UKBB_EUR_2017       |
| rs7919685  | Age completed full time education                                 | Neale B | UKBB     | European | 2017 | 0.01436  | 0.002425 | 3.19E-09 | 226899 | 0      | 226899 | 1  | -         | Neale-B_UKBB_EUR_2017       |
| rs7919685  | Diastolic blood pressure                                          | Neale B | UKBB     | European | 2017 | -0.01753 | 0.002464 | 1.14E-12 | 317756 | 0      | 317756 | 1  | IVNT      | Neale-B_UKBB_EUR_2017       |
| rs7919685  | Qualifications: A levels or as levels or equivalent               | Neale B | UKBB     | European | 2017 | 0.005654 | 0.001093 | 2.30E-07 | 334070 | 91710  | 242360 | 1  | risk diff | Neale-B_UKBB_EUR_2017       |
| rs7919685  | Qualifications: college or university degree                      | Neale B | UKBB     | European | 2017 | 0.005944 | 0.001114 | 1.85E-07 | 334070 | 106305 | 227765 | 1  | risk diff | Neale-B_UKBB_EUR_2017       |
| rs7919685  | Qualifications: none                                              | Neale B | UKBB     | European | 2017 | -0.00624 | 0.000924 | 1.52E-11 | 334070 | 57567  | 276503 | 1  | risk diff | Neale-B_UKBB_EUR_2017       |
| rs7919685  | Years of educational attainment in males                          | SSGAC   | 27225129 | European | 2016 | 0.02     | 0.004    | 1.02E-07 | 147474 | 0      | 147474 | 6  | years     | SSGAC_EduYears-M_EUR_2016   |
| rs7919685  | Years of educational attainment                                   | SSGAC   | 27225129 | European | 2016 | 0.014    | 0.002    | 2.33E-08 | 328917 | 0      | 328917 | 64 | years     | SSGAC_EduYears_EUR_2016     |
| rs2185027  | Fasting glucose                                                   | MAGIC   | 22885924 | European | 2012 | -0.01    | 0.0022   | 2.55E-06 | 133010 | 0      | 133010 | 66 | mmol/l    | MAGIC_FG-METABO_EUR_2012    |
| rs9848497  | Age completed full time education                                 | Neale B | UKBB     | European | 2017 | -0.01505 | 0.002425 | 5.48E-10 | 226899 | 0      | 226899 | 1  | -         | Neale-B_UKBB_EUR_2017       |
| rs9848497  | Diabetes diagnosed by doctor                                      | Neale B | UKBB     | European | 2017 | 0.002357 | 0.000521 | 5.97E-06 | 336473 | 16183  | 320290 | 1  | risk diff | Neale-B_UKBB_EUR_2017       |
| rs9848497  | Diastolic blood pressure                                          | Neale B | UKBB     | European | 2017 | 0.01361  | 0.002461 | 3.18E-08 | 317756 | 0      | 317756 | 1  | IVNT      | Neale-B_UKBB_EUR_2017       |
| rs9848497  | Qualifications: A levels or as levels or equivalent               | Neale B | UKBB     | European | 2017 | -0.0106  | 0.001091 | 2.51E-22 | 334070 | 91710  | 242360 | 1  | risk diff | Neale-B_UKBB_EUR_2017       |
| rs9848497  | Qualifications: college or university degree                      | Neale B | UKBB     | European | 2017 | -0.01373 | 0.001138 | 1.64E-33 | 334070 | 106305 | 227765 | 1  | risk diff | Neale-B_UKBB_EUR_2017       |
| rs9848497  | Qualifications: none                                              | Neale B | UKBB     | European | 2017 | 0.006491 | 0.000923 | 1.99E-12 | 334070 | 57567  | 276503 | 1  | risk diff | Neale-B_UKBB_EUR_2017       |
| rs9848497  | Qualifications: other professional qualifications                 | Neale B | UKBB     | European | 2017 | -0.00513 | 0.001112 | 3.95E-06 | 334070 | 97524  | 236546 | 1  | risk diff | Neale-B_UKBB_EUR_2017       |
| rs9848497  | Self-reported diabetes                                            | Neale B | UKBB     | European | 2017 | 0.002247 | 0.000472 | 1.94E-06 | 337159 | 13243  | 323916 | 1  | risk diff | Neale-B_UKBB_EUR_2017       |
| rs9848497  | Wheeze or whistling in the chest in last year                     | Neale B | UKBB     | European | 2017 | 0.00692  | 0.000995 | 3.44E-12 | 331257 | 68531  | 262726 | 1  | risk diff | Neale-B_UKBB_EUR_2017       |
| rs9848497  | Years of educational attainment in females                        | SSGAC   | 27225129 | European | 2016 | -0.023   | 0.003    | 2.52E-12 | 181443 | 0      | 181443 | 62 | years     | SSGAC_EduYears-F_EUR_2016   |
| rs9848497  | Years of educational attainment in males                          | SSGAC   | 27225129 | European | 2016 | -0.021   | 0.004    | 9.19E-09 | 147474 | 0      | 147474 | 6  | years     | SSGAC_EduYears-M_EUR_2016   |
| rs9848497  | Years of educational attainment                                   | SSGAC   | 27225129 | European | 2016 | -0.021   | 0.002    | 1.39E-17 | 328917 | 0      | 328917 | 64 | years     | SSGAC_EduYears_EUR_2016     |
| rs56038006 | Qualifications: college or university degree                      | Neale B | UKBB     | European | 2017 | -0.00981 | 0.001513 | 9.00E-11 | 334070 | 106305 | 227765 | 1  | risk diff | Neale-B_UKBB_EUR_2017       |
| rs56038006 | Years of educational attainment in males                          | SSGAC   | 27225129 | European | 2016 | -0.025   | 0.005    | 2.46E-07 | 147474 | 0      | 147474 | 6  | years     | SSGAC_EduYears-M_EUR_2016   |
| rs56038006 | Years of educational attainment                                   | SSGAC   | 27225129 | European | 2016 | -0.017   | 0.003    | 5.66E-08 | 328917 | 0      | 328917 | 64 | years     | SSGAC_EduYears_EUR_2016     |
| rs2304130  | Type II diabetes                                                  | DIAGRAM | 26551672 | European | 2015 | -0.1231  | 0.02277  | 5.50E-08 | 84780  | 27206  | 57574  | 23 | log OR    | DIAGRAM_T2D-METABO_EUR_2015 |
| rs2304130  | Type 2 diabetes                                                   | DIAGRAM | 22885922 | Mixed    | 2012 | NA       | NA       | 1.10E-97 | 69033  | -      | -      | -  | -         | GRASP                       |
| rs2304130  | Diabetes diagnosed by doctor                                      | Neale B | UKBB     | European | 2017 | -0.00471 | 0.000929 | 3.97E-07 | 336473 | 16183  | 320290 | 1  | risk diff | Neale-B_UKBB_EUR_2017       |
| rs2304130  | Self-reported diabetes                                            | Neale B | UKBB     | European | 2017 | -0.00404 | 0.000842 | 1.63E-06 | 337159 | 13243  | 323916 | 1  | risk diff | Neale-B_UKBB_EUR_2017       |
| rs2304607  | Diastolic blood pressure                                          | Neale B | UKBB     | European | 2017 | 0.02104  | 0.003622 | 6.31E-09 | 317756 | 0      | 317756 | 1  | IVNT      | Neale-B_UKBB_EUR_2017       |
| rs2304607  | Qualifications: college or university degree                      | Neale B | UKBB     | European | 2017 | 0.01006  | 0.001676 | 2.00E-09 | 334070 | 106305 | 227765 | 1  | risk diff | Neale-B_UKBB_EUR_2017       |
| rs9942416  | Self-reported diabetes                                            | Neale B | UKBB     | European | 2017 | 0.002203 | 0.000491 | 7.23E-06 | 337159 | 13243  | 323916 | 1  | risk diff | Neale-B_UKBB_EUR_2017       |
| rs2397061  | Elevated blood glucose level                                      | Neale B | UKBB     | European | 2017 | 0.000389 | 7.37E-05 | 1.33E-07 | 337199 | 125    | 337074 | 1  | risk diff | Neale-B_UKBB_EUR_2017       |
| rs2516739  | Diastolic blood pressure                                          | Neale B | UKBB     | European | 2017 | 0.01444  | 0.002975 | 1.22E-06 | 317756 | 0      | 317756 | 1  | IVNT      | Neale-B_UKBB_EUR_2017       |
| rs2516739  | Systolic blood pressure                                           | Neale B | UKBB     | European | 2017 | 0.0142   | 0.002973 | 1.78E-06 | 317754 | 0      | 317754 | 1  | IVNT      | Neale-B_UKBB_EUR_2017       |
| rs2590942  | Ever smoked                                                       | Neale B | UKBB     | European | 2017 | 0.007059 | 0.001481 | 1.86E-06 | 336067 | 202585 | 133482 | 1  | risk diff | Neale-B_UKBB_EUR_2017       |
| rs2590942  | Past tobacco smoking                                              | Neale B | UKBB     | European | 2017 | -0.02173 | 0.003946 | 3.65E-08 | 310749 | 0      | 310749 | 1  | -         | Neale-B_UKBB_EUR_2017       |
| rs2590942  | Self-reported hypertension                                        | Neale B | UKBB     | European | 2017 | 0.006167 | 0.001327 | 3.36E-06 | 337159 | 87690  | 249469 | 1  | risk diff | Neale-B_UKBB_EUR_2017       |
| rs2590942  | Smoking status: previous                                          | Neale B | UKBB     | European | 2017 | 0.007754 | 0.001448 | 8.63E-08 | 336024 | 118419 | 217605 | 1  | risk diff | Neale-B_UKBB_EUR_2017       |
| rs2590942  | Vascular or heart problems diagnosed by doctor: high blood pres   | Neale B | UKBB     | European | 2017 | 0.005998 | 0.001345 | 8.26E-06 | 336683 | 91033  | 245650 | 1  | risk diff | Neale-B_UKBB_EUR_2017       |
| rs2817419  | Diabetes diagnosed by doctor                                      | Neale B | UKBB     | European | 2017 | 0.002799 | 0.000592 | 2.28E-06 | 336473 | 16183  | 320290 | 1  | risk diff | Neale-B_UKBB_EUR_2017       |
| rs2817419  | Self-reported diabetes                                            | Neale B | UKBB     | European | 2017 | 0.002413 | 0.000537 | 6.95E-06 | 337159 | 13243  | 323916 | 1  | risk diff | Neale-B_UKBB_EUR_2017       |
| rs273504   | Diastolic blood pressure                                          | Neale B | UKBB     | European | 2017 | -0.01175 | 0.002493 | 2.46E-06 | 317756 | 0      | 317756 | 1  | IVNT      | Neale-B_UKBB_EUR_2017       |
| rs273504   | Qualifications: college or university degree                      | Neale B | UKBB     | European | 2017 | 0.006087 | 0.001154 | 1.32E-07 | 334070 | 106305 | 227765 | 1  | risk diff | Neale-B_UKBB_EUR_2017       |
| rs7655341  | Systolic blood pressure                                           | Neale B | UKBB     | European | 2017 | 0.0139   | 0.002764 | 4.93E-07 | 317754 | 0      | 317754 | 1  | IVNT      | Neale-B_UKBB_EUR_2017       |
| rs7655341  | Treatment with simvastatin                                        | Neale B | UKBB     | European | 2017 | 0.004029 | 0.000865 | 3.18E-06 | 337159 | 38492  | 298667 | 1  | risk diff | Neale-B_UKBB_EUR_2017       |
| rs2820311  | Diastolic blood pressure                                          | Neale B | UKBB     | European | 2017 | -0.01662 | 0.002602 | 1.67E-10 | 317756 | 0      | 317756 | 1  | IVNT      | Neale-B_UKBB_EUR_2017       |
| rs2820311  | Qualifications: college or university degree                      | Neale B | UKBB     | European | 2017 | 0.006038 | 0.001203 | 5.25E-07 | 334070 | 106305 | 227765 | 1  | risk diff | Neale-B_UKBB_EUR_2017       |
| rs2820311  | Qualifications: other professional qualifications                 | Neale B | UKBB     | European | 2017 | 0.006058 | 0.001176 | 2.57E-07 | 334070 | 97524  | 236546 | 1  | risk diff | Neale-B_UKBB_EUR_2017       |
| rs2820311  | Self-reported hypertension                                        | Neale B | UKBB     | European | 2017 | -0.00507 | 0.001126 | 6.68E-06 | 337159 | 87690  | 249469 | 1  | risk diff | Neale-B_UKBB_EUR_2017       |
| rs2820311  | Vascular or heart problems diagnosed by doctor: high blood pres   | Neale B | UKBB     | European | 2017 | -0.00505 | 0.001142 | 9.97E-06 | 336683 | 91033  | 245650 | 1  | risk diff | Neale-B_UKBB_EUR_2017       |
| rs2836961  | No blood clot, bronchitis, emphysema, asthma, rhinitis, eczema o  | Neale B | UKBB     | European | 2017 | -0.00547 | 0.001174 | 3.16E-06 | 336782 | 228530 | 108252 | 1  | risk diff | Neale-B_UKBB_EUR_2017       |
| rs1041448  | Qualifications: college or university degree                      | Neale B | UKBB     | European | 2017 | -0.00623 | 0.001192 | 1.74E-07 | 334070 | 106305 | 227765 | 1  | risk diff | Neale-B_UKBB_EUR_2017       |
| rs1041448  | Years of educational attainment                                   | SSGAC   | 27225129 | European | 2016 | -0.012   | 0.003    | 5.55E-06 | 328917 | 0      | 328917 | 64 | years     | SSGAC_EduYears_EUR_2016     |
| rs2842385  | Qualifications: A levels or as levels or equivalent               | Neale B | UKBB     | European | 2017 | -0.00614 | 0.001367 | 7.04E-06 | 334070 | 91710  | 242360 | 1  | risk diff | Neale-B_UKBB_EUR_2017       |
| rs2842385  | Qualifications: college or university degree                      | Neale B | UKBB     | European | 2017 | -0.00872 | 0.001426 | 9.66E-10 | 334070 | 106305 | 227765 | 1  | risk diff | Neale-B_UKBB_EUR_2017       |
| rs2842385  | Years of educational attainment                                   | SSGAC   | 27225129 | European | 2016 | -0.016   | 0.003    | 5.09E-07 | 328917 | 0      | 328917 | 64 | years     | SSGAC_EduYears_EUR_2016     |

|            |                                                                 |            |          |          |      |          |          |          |        |        |        |    |           |                                      |
|------------|-----------------------------------------------------------------|------------|----------|----------|------|----------|----------|----------|--------|--------|--------|----|-----------|--------------------------------------|
| rs1757457  | Hayfever, allergic rhinitis or eczema                           | Neale B    | UKBB     | European | 2017 | -0.00579 | 0.001238 | 2.93E-06 | 336782 | 77891  | 258891 | 1  | risk diff | Neale-B_UKBB_EUR_2017                |
| rs1757457  | No blood clot, bronchitis, emphysema, asthma, rhinitis, eczema  | Neale B    | UKBB     | European | 2017 | 0.007501 | 0.001372 | 4.55E-08 | 336782 | 228530 | 108252 | 1  | risk diff | Neale-B_UKBB_EUR_2017                |
| rs329124   | Current tobacco smoking                                         | Neale B    | UKBB     | European | 2017 | 0.006439 | 0.001341 | 1.57E-06 | 337030 | 0      | 337030 | 1  | -         | Neale-B_UKBB_EUR_2017                |
| rs329124   | Qualifications: college or university degree                    | Neale B    | UKBB     | European | 2017 | -0.00605 | 0.001155 | 1.66E-07 | 334070 | 106305 | 227765 | 1  | risk diff | Neale-B_UKBB_EUR_2017                |
| rs329124   | Years of educational attainment                                 | SSGAC      | 27225129 | European | 2016 | -0.012   | 0.002    | 8.81E-07 | 328917 | 0      | 328917 | 64 | years     | SSGAC_EduYears_EUR_2016              |
| rs3734572  | Self-reported psoriasis                                         | Neale B    | UKBB     | European | 2017 | -0.0093  | 0.000635 | 1.69E-48 | 337159 | 3871   | 333288 | 1  | risk diff | Neale-B_UKBB_EUR_2017                |
| rs3734572  | Self-reported psoriatic arthropathy                             | Neale B    | UKBB     | European | 2017 | -0.00148 | 0.000262 | 1.54E-08 | 337159 | 650    | 336509 | 1  | risk diff | Neale-B_UKBB_EUR_2017                |
| rs7201850  | Type II diabetes                                                | DIAGRAM    | 26551672 | European | 2015 | -0.1266  | 0.01281  | 2.80E-23 | 84780  | 27206  | 57574  | 23 | log OR    | DIAGRAM_T2D-METABO_EUR_2015          |
| rs7201850  | Type II diabetes                                                | DIAGRAM    | 22885922 | European | 2012 | -0.1133  | 0.01823  | 7.70E-10 | 63390  | 9580   | 53810  | 12 | log OR    | DIAGRAM_T2D_EUR_2012                 |
| rs7201850  | Type II diabetes                                                | DIAGRAM    | 28566273 | European | 2017 | -0.12    | 0.012    | 2.50E-22 | 159208 | 26676  | 132532 | 18 | log OR    | DIAGRAM_T2D_EUR_2017                 |
| rs7201850  | Type II diabetes                                                | DIAGRAM    | 24509480 | Mixed    | 2014 | -0.08618 | 0.01405  | 4.00E-10 | 110452 | 26488  | 83964  | 4  | log OR    | DIAGRAM_T2D_Mixed_2014               |
| rs7201850  | Diabetes diagnosed by doctor                                    | Neale B    | UKBB     | European | 2017 | -0.00482 | 0.000529 | 7.83E-20 | 336473 | 16183  | 320290 | 1  | risk diff | Neale-B_UKBB_EUR_2017                |
| rs7201850  | Illnesses of father: diabetes                                   | Neale B    | UKBB     | European | 2017 | -0.00386 | 0.000768 | 5.07E-07 | 293407 | 28197  | 265210 | 1  | risk diff | Neale-B_UKBB_EUR_2017                |
| rs7201850  | Illnesses of mother: diabetes                                   | Neale B    | UKBB     | European | 2017 | -0.00375 | 0.000739 | 3.87E-07 | 309953 | 28875  | 281078 | 1  | risk diff | Neale-B_UKBB_EUR_2017                |
| rs7201850  | Self-reported diabetes                                          | Neale B    | UKBB     | European | 2017 | -0.00383 | 0.00048  | 1.37E-15 | 337159 | 13243  | 323916 | 1  | risk diff | Neale-B_UKBB_EUR_2017                |
| rs7201850  | Self-reported hypertension                                      | Neale B    | UKBB     | European | 2017 | -0.00752 | 0.001082 | 3.68E-12 | 337159 | 87690  | 249469 | 1  | risk diff | Neale-B_UKBB_EUR_2017                |
| rs7201850  | Treatment with blood pressure medication                        | Neale B    | UKBB     | European | 2017 | -0.00706 | 0.001286 | 4.01E-08 | 180203 | 31488  | 148715 | 1  | risk diff | Neale-B_UKBB_EUR_2017                |
| rs7201850  | Vascular or heart problems diagnosed by doctor: high blood pres | Neale B    | UKBB     | European | 2017 | -0.00741 | 0.001097 | 1.42E-11 | 336683 | 91033  | 245650 | 1  | risk diff | Neale-B_UKBB_EUR_2017                |
| rs3768486  | Vascular or heart problems diagnosed by doctor: high blood pres | Neale B    | UKBB     | European | 2017 | -0.00636 | 0.001399 | 5.38E-06 | 336683 | 91033  | 245650 | 1  | risk diff | Neale-B_UKBB_EUR_2017                |
| rs3800229  | Qualifications: college or university degree                    | Neale B    | UKBB     | European | 2017 | -0.00633 | 0.001266 | 5.81E-07 | 334070 | 106305 | 227765 | 1  | risk diff | Neale-B_UKBB_EUR_2017                |
| rs3800229  | Qualifications: none                                            | Neale B    | UKBB     | European | 2017 | 0.005058 | 0.001026 | 8.28E-07 | 334070 | 57567  | 276503 | 1  | risk diff | Neale-B_UKBB_EUR_2017                |
| rs3803286  | Hayfever, allergic rhinitis or eczema                           | Neale B    | UKBB     | European | 2017 | 0.005949 | 0.001087 | 4.47E-08 | 336782 | 77891  | 258891 | 1  | risk diff | Neale-B_UKBB_EUR_2017                |
| rs3803286  | No blood clot, bronchitis, emphysema, asthma, rhinitis, eczema  | Neale B    | UKBB     | European | 2017 | -0.00539 | 0.001205 | 7.63E-06 | 336782 | 228530 | 108252 | 1  | risk diff | Neale-B_UKBB_EUR_2017                |
| rs3803286  | Qualifications: none                                            | Neale B    | UKBB     | European | 2017 | -0.00467 | 0.000978 | 1.79E-06 | 334070 | 57567  | 276503 | 1  | risk diff | Neale-B_UKBB_EUR_2017                |
| rs3803286  | Self-reported eczema or dermatitis                              | Neale B    | UKBB     | European | 2017 | 0.00192  | 0.00041  | 2.77E-06 | 337159 | 8718   | 328441 | 1  | risk diff | Neale-B_UKBB_EUR_2017                |
| rs3810291  | Diabetes diagnosed by doctor                                    | Neale B    | UKBB     | European | 2017 | 0.003169 | 0.000557 | 1.24E-08 | 336473 | 16183  | 320290 | 1  | risk diff | Neale-B_UKBB_EUR_2017                |
| rs3810291  | Self-reported diabetes                                          | Neale B    | UKBB     | European | 2017 | 0.002298 | 0.000505 | 5.26E-06 | 337159 | 13243  | 323916 | 1  | risk diff | Neale-B_UKBB_EUR_2017                |
| rs3810291  | Wheeze or whistling in the chest in last year                   | Neale B    | UKBB     | European | 2017 | 0.005471 | 0.001063 | 2.68E-07 | 331257 | 68531  | 262726 | 1  | risk diff | Neale-B_UKBB_EUR_2017                |
| rs3814883  | Self-reported hypertension                                      | Neale B    | UKBB     | European | 2017 | 0.005114 | 0.00107  | 1.75E-06 | 337159 | 87690  | 249469 | 1  | risk diff | Neale-B_UKBB_EUR_2017                |
| rs3814883  | Vascular or heart problems diagnosed by doctor: high blood pres | Neale B    | UKBB     | European | 2017 | 0.005311 | 0.001084 | 9.72E-07 | 336683 | 91033  | 245650 | 1  | risk diff | Neale-B_UKBB_EUR_2017                |
| rs3922853  | Qualifications: A levels or as levels or equivalent             | Neale B    | UKBB     | European | 2017 | 0.006996 | 0.001438 | 1.14E-06 | 334070 | 91710  | 242360 | 1  | risk diff | Neale-B_UKBB_EUR_2017                |
| rs3922853  | Qualifications: O levels or GCSEs or equivalent                 | Neale B    | UKBB     | European | 2017 | 0.007139 | 0.001605 | 8.64E-06 | 334070 | 159730 | 174340 | 1  | risk diff | Neale-B_UKBB_EUR_2017                |
| rs149457   | Systolic blood pressure                                         | Neale B    | UKBB     | European | 2017 | -0.01744 | 0.003282 | 1.08E-07 | 317754 | 0      | 317754 | 1  | IVNT      | Neale-B_UKBB_EUR_2017                |
| rs10496345 | Years of education                                              | SSGAC      | 23722424 | European | 2013 | NA       | NA       | 4.47E-07 | 101069 | -      | -      | -  | -         | GRASP                                |
| rs10496345 | Qualifications: A levels or as levels or equivalent             | Neale B    | UKBB     | European | 2017 | 0.006314 | 0.001115 | 1.48E-08 | 334070 | 91710  | 242360 | 1  | risk diff | Neale-B_UKBB_EUR_2017                |
| rs10496345 | Qualifications: college or university degree                    | Neale B    | UKBB     | European | 2017 | 0.01083  | 0.001163 | 1.27E-20 | 334070 | 106305 | 227765 | 1  | risk diff | Neale-B_UKBB_EUR_2017                |
| rs10496345 | Qualifications: none                                            | Neale B    | UKBB     | European | 2017 | -0.00482 | 0.000943 | 3.21E-07 | 334070 | 57567  | 276503 | 1  | risk diff | Neale-B_UKBB_EUR_2017                |
| rs10496345 | Years of educational attainment in females                      | SSGAC      | 27225129 | European | 2016 | 0.021    | 0.003    | 6.08E-10 | 181443 | 0      | 181443 | 62 | years     | SSGAC_EduYears-F_EUR_2016            |
| rs10496345 | Years of educational attainment in males                        | SSGAC      | 27225129 | European | 2016 | 0.025    | 0.004    | 8.78E-11 | 147474 | 0      | 147474 | 6  | years     | SSGAC_EduYears-M_EUR_2016            |
| rs10496345 | Years of educational attainment                                 | SSGAC      | 23722424 | European | 2013 | 0.021    | 0.004    | 4.47E-07 | 101069 | 0      | 101069 | 42 | years     | SSGAC_EduYears_EUR_2013              |
| rs10496345 | Years of educational attainment                                 | SSGAC      | 27225129 | European | 2016 | 0.022    | 0.003    | 8.01E-18 | 328917 | 0      | 328917 | 64 | years     | SSGAC_EduYears_EUR_2016              |
| rs4372296  | Qualifications: college or university degree                    | Neale B    | UKBB     | European | 2017 | 0.007896 | 0.001374 | 9.06E-09 | 334070 | 106305 | 227765 | 1  | risk diff | Neale-B_UKBB_EUR_2017                |
| rs4372296  | Wheeze or whistling in the chest in last year                   | Neale B    | UKBB     | European | 2017 | -0.00623 | 0.001201 | 2.07E-07 | 331257 | 68531  | 262726 | 1  | risk diff | Neale-B_UKBB_EUR_2017                |
| rs4515655  | Current tobacco smoking                                         | Neale B    | UKBB     | European | 2017 | 0.006197 | 0.001349 | 4.34E-06 | 337030 | 0      | 337030 | 1  | -         | Neale-B_UKBB_EUR_2017                |
| rs4516268  | Qualifications: college or university degree                    | Neale B    | UKBB     | European | 2017 | 0.006659 | 0.001442 | 3.86E-06 | 334070 | 106305 | 227765 | 1  | risk diff | Neale-B_UKBB_EUR_2017                |
| rs388614   | Self-reported hypertension                                      | Neale B    | UKBB     | European | 2017 | -0.00517 | 0.001081 | 1.73E-06 | 337159 | 87690  | 249469 | 1  | risk diff | Neale-B_UKBB_EUR_2017                |
| rs4653017  | Ever smoked                                                     | Neale B    | UKBB     | European | 2017 | -0.0067  | 0.001282 | 1.73E-07 | 336067 | 202585 | 133482 | 1  | risk diff | Neale-B_UKBB_EUR_2017                |
| rs4653017  | Past tobacco smoking                                            | Neale B    | UKBB     | European | 2017 | 0.01777  | 0.003412 | 1.91E-07 | 310749 | 0      | 310749 | 1  | -         | Neale-B_UKBB_EUR_2017                |
| rs1559625  | Qualifications: college or university degree                    | Neale B    | UKBB     | European | 2017 | -0.0058  | 0.001165 | 6.38E-07 | 334070 | 106305 | 227765 | 1  | risk diff | Neale-B_UKBB_EUR_2017                |
| rs4744275  | Qualifications: none                                            | Neale B    | UKBB     | European | 2017 | 0.004856 | 0.001051 | 3.83E-06 | 334070 | 57567  | 276503 | 1  | risk diff | Neale-B_UKBB_EUR_2017                |
| rs4759073  | Qualifications: college or university degree                    | Neale B    | UKBB     | European | 2017 | 0.005864 | 0.001155 | 3.80E-07 | 334070 | 106305 | 227765 | 1  | risk diff | Neale-B_UKBB_EUR_2017                |
| rs4759073  | Qualifications: other professional qualifications               | Neale B    | UKBB     | European | 2017 | 0.005149 | 0.001128 | 5.01E-06 | 334070 | 97524  | 236546 | 1  | risk diff | Neale-B_UKBB_EUR_2017                |
| rs4759228  | Allergic disease                                                | Ferreira M | 29083406 | European | 2017 | -0.0379  | 0.0065   | 4.78E-09 | 360838 | 180129 | 180709 | 13 | log OR    | Ferreira-M_Allergic-Disease_EUR_2017 |
| rs4759228  | Asthma                                                          | Neale B    | UKBB     | European | 2017 | -0.0043  | 0.000854 | 4.66E-07 | 336782 | 38791  | 297991 | 1  | risk diff | Neale-B_UKBB_EUR_2017                |
| rs4759228  | Hayfever, allergic rhinitis or eczema                           | Neale B    | UKBB     | European | 2017 | -0.00758 | 0.001126 | 1.72E-11 | 336782 | 77891  | 258891 | 1  | risk diff | Neale-B_UKBB_EUR_2017                |
| rs4759228  | No blood clot, bronchitis, emphysema, asthma, rhinitis, eczema  | Neale B    | UKBB     | European | 2017 | 0.008588 | 0.001248 | 9.95E-12 | 336782 | 228530 | 108252 | 1  | risk diff | Neale-B_UKBB_EUR_2017                |
| rs4759228  | Qualifications: college or university degree                    | Neale B    | UKBB     | European | 2017 | -0.00553 | 0.001249 | 9.56E-06 | 334070 | 106305 | 227765 | 1  | risk diff | Neale-B_UKBB_EUR_2017                |
| rs4759228  | Self-reported asthma                                            | Neale B    | UKBB     | European | 2017 | -0.00455 | 0.000855 | 1.04E-07 | 337159 | 39049  | 298110 | 1  | risk diff | Neale-B_UKBB_EUR_2017                |
| rs4759228  | Years of educational attainment                                 | SSGAC      | 27225129 | European | 2016 | -0.014   | 0.003    | 1.37E-06 | 328917 | 0      | 328917 | 64 | years     | SSGAC_EduYears_EUR_2016              |

|            |                                                                     |         |          |          |      |          |          |          |        |        |        |             |                                   |
|------------|---------------------------------------------------------------------|---------|----------|----------|------|----------|----------|----------|--------|--------|--------|-------------|-----------------------------------|
| rs4796243  | Self-reported allergy or anaphylactic reaction to drug              | Neale B | UKBB     | European | 2017 | -0.00116 | 0.000252 | 4.08E-06 | 337159 | 3043   | 334116 | 1 risk diff | Neale-B_UKBB_EUR_2017             |
| rs487060   | Treatment with atorvastatin                                         | Neale B | UKBB     | European | 2017 | 0.002086 | 0.000418 | 5.91E-07 | 337159 | 10167  | 326992 | 1 risk diff | Neale-B_UKBB_EUR_2017             |
| rs487060   | Treatment with simvastatin                                          | Neale B | UKBB     | European | 2017 | 0.003458 | 0.000774 | 7.80E-06 | 337159 | 38492  | 298667 | 1 risk diff | Neale-B_UKBB_EUR_2017             |
| rs11857450 | Type II diabetes adjusted for BMI                                   | DIAGRAM | 28566273 | European | 2017 | 0.074    | 0.016    | 4.00E-06 | 159208 | 26676  | 132532 | 18 log OR   | DIAGRAM_T2D-adjusted-BMI_EUR_2017 |
| rs11857450 | Type II diabetes                                                    | DIAGRAM | 28566273 | European | 2017 | 0.078    | 0.014    | 1.40E-08 | 159208 | 26676  | 132532 | 18 log OR   | DIAGRAM_T2D_EUR_2017              |
| rs11857450 | Type II diabetes                                                    | DIAGRAM | 24509480 | Mixed    | 2014 | 0.08618  | 0.01405  | 3.60E-11 | 110452 | 26488  | 83964  | 4 log OR    | DIAGRAM_T2D_Mixed_2014            |
| rs11857450 | Diabetes diagnosed by doctor                                        | Neale B | UKBB     | European | 2017 | 0.003093 | 0.000581 | 9.98E-08 | 336473 | 16183  | 320290 | 1 risk diff | Neale-B_UKBB_EUR_2017             |
| rs11857450 | Self-reported diabetes                                              | Neale B | UKBB     | European | 2017 | 0.002497 | 0.000527 | 2.11E-06 | 337159 | 13243  | 323916 | 1 risk diff | Neale-B_UKBB_EUR_2017             |
| rs4916661  | Years of educational attainment                                     | SSGAC   | 27225129 | European | 2016 | 0.011    | 0.003    | 7.05E-06 | 328917 | 0      | 328917 | 64 years    | SSGAC_EduYears_EUR_2016           |
| rs1569979  | Qualifications: A levels or as levels or equivalent                 | Neale B | UKBB     | European | 2017 | -0.00664 | 0.0013   | 3.24E-07 | 334070 | 91710  | 242360 | 1 risk diff | Neale-B_UKBB_EUR_2017             |
| rs1569979  | Qualifications: college or university degree                        | Neale B | UKBB     | European | 2017 | -0.0063  | 0.001357 | 3.38E-06 | 334070 | 106305 | 227765 | 1 risk diff | Neale-B_UKBB_EUR_2017             |
| rs1569979  | Years of educational attainment                                     | SSGAC   | 27225129 | European | 2016 | -0.015   | 0.003    | 5.68E-07 | 328917 | 0      | 328917 | 64 years    | SSGAC_EduYears_EUR_2016           |
| rs5396     | Current employment status: unable to work because of sickness       | Neale B | UKBB     | European | 2017 | -0.00233 | 0.000517 | 6.22E-06 | 336252 | 12554  | 323698 | 1 risk diff | Neale-B_UKBB_EUR_2017             |
| rs6121381  | Self-reported hypertension                                          | Neale B | UKBB     | European | 2017 | -0.00665 | 0.001471 | 6.20E-06 | 337159 | 87690  | 249469 | 1 risk diff | Neale-B_UKBB_EUR_2017             |
| rs6121381  | Vascular or heart problems diagnosed by doctor: high blood pressure | Neale B | UKBB     | European | 2017 | -0.00673 | 0.001491 | 6.33E-06 | 336683 | 91033  | 245650 | 1 risk diff | Neale-B_UKBB_EUR_2017             |
| rs6235     | 3233 split proinsulin in non diabetics                              | MAGIC   | 21873549 | European | 2011 | NA       | NA       | 4.50E-06 | 10701  | -      | -      | -           | GRASP                             |
| rs6235     | Diabetes mellitus type 2                                            | MAGIC   | 21873549 | European | 2011 | NA       | NA       | 1.00E-26 | -      | -      | -      | -           | dbGaP                             |
| rs11030104 | Ever smoked                                                         | Neale B | UKBB     | European | 2017 | 0.00705  | 0.001476 | 1.79E-06 | 336067 | 202585 | 133482 | 1 risk diff | Neale-B_UKBB_EUR_2017             |
| rs11030104 | Past tobacco smoking                                                | Neale B | UKBB     | European | 2017 | -0.02319 | 0.003928 | 3.56E-09 | 310749 | 0      | 310749 | 1 -         | Neale-B_UKBB_EUR_2017             |
| rs6442101  | Diastolic blood pressure                                            | ICBP    | 21909115 | European | 2011 | NA       | NA       | 8.80E-06 | 69395  | -      | -      | -           | GRASP                             |
| rs6442101  | Diastolic blood pressure                                            | ICBP    | 21909115 | European | 2011 | NA       | NA       | 8.80E-06 | 69395  | 0      | 69395  | 29 mmHg     | ICBP_DBP_EUR_2011                 |
| rs6442101  | Diastolic blood pressure                                            | Neale B | UKBB     | European | 2017 | -0.01355 | 0.002638 | 2.79E-07 | 317756 | 0      | 317756 | 1 IVNT      | Neale-B_UKBB_EUR_2017             |
| rs6442101  | Qualifications: college or university degree                        | Neale B | UKBB     | European | 2017 | -0.00601 | 0.001221 | 8.65E-07 | 334070 | 106305 | 227765 | 1 risk diff | Neale-B_UKBB_EUR_2017             |
| rs6442101  | Self-reported hypertension                                          | Neale B | UKBB     | European | 2017 | -0.00521 | 0.001143 | 5.06E-06 | 337159 | 87690  | 249469 | 1 risk diff | Neale-B_UKBB_EUR_2017             |
| rs6449531  | Qualifications: A levels or as levels or equivalent                 | Neale B | UKBB     | European | 2017 | -0.0058  | 0.001137 | 3.35E-07 | 334070 | 91710  | 242360 | 1 risk diff | Neale-B_UKBB_EUR_2017             |
| rs6449531  | Qualifications: college or university degree                        | Neale B | UKBB     | European | 2017 | -0.00806 | 0.001186 | 1.04E-11 | 334070 | 106305 | 227765 | 1 risk diff | Neale-B_UKBB_EUR_2017             |
| rs6449531  | Qualifications: none                                                | Neale B | UKBB     | European | 2017 | 0.005503 | 0.000961 | 1.04E-08 | 334070 | 57567  | 276503 | 1 risk diff | Neale-B_UKBB_EUR_2017             |
| rs6449531  | Qualifications: other professional qualifications                   | Neale B | UKBB     | European | 2017 | -0.0054  | 0.001158 | 3.11E-06 | 334070 | 97524  | 236546 | 1 risk diff | Neale-B_UKBB_EUR_2017             |
| rs6449531  | Years of educational attainment                                     | SSGAC   | 27225129 | European | 2016 | -0.012   | 0.003    | 2.12E-06 | 328917 | 0      | 328917 | 64 years    | SSGAC_EduYears_EUR_2016           |
| rs663129   | Type II diabetes                                                    | DIAGRAM | 28566273 | European | 2017 | -0.064   | 0.014    | 4.60E-06 | 159208 | 26676  | 132532 | 18 log OR   | DIAGRAM_T2D_EUR_2017              |
| rs663129   | Type II diabetes                                                    | DIAGRAM | 24509480 | Mixed    | 2014 | -0.07696 | 0.01418  | 4.50E-08 | 110452 | 26488  | 83964  | 4 log OR    | DIAGRAM_T2D_Mixed_2014            |
| rs663129   | Diabetes diagnosed by doctor                                        | Neale B | UKBB     | European | 2017 | -0.00309 | 0.000614 | 4.71E-07 | 336473 | 16183  | 320290 | 1 risk diff | Neale-B_UKBB_EUR_2017             |
| rs663129   | Vascular or heart problems diagnosed by doctor: high blood pressure | Neale B | UKBB     | European | 2017 | -0.00596 | 0.001274 | 2.94E-06 | 336683 | 91033  | 245650 | 1 risk diff | Neale-B_UKBB_EUR_2017             |
| rs6738445  | Diastolic blood pressure                                            | Neale B | UKBB     | European | 2017 | 0.01485  | 0.002729 | 5.29E-08 | 317756 | 0      | 317756 | 1 IVNT      | Neale-B_UKBB_EUR_2017             |
| rs6818414  | Tobacco smoking: smokes on most or all days                         | Neale B | UKBB     | European | 2017 | 0.003229 | 0.000728 | 9.26E-06 | 83133  | 1869   | 81264  | 1 risk diff | Neale-B_UKBB_EUR_2017             |
| rs6843738  | Diastolic blood pressure                                            | Neale B | UKBB     | European | 2017 | -0.01385 | 0.002622 | 1.29E-07 | 317756 | 0      | 317756 | 1 IVNT      | Neale-B_UKBB_EUR_2017             |
| rs6843738  | Self-reported hypertension                                          | Neale B | UKBB     | European | 2017 | -0.0064  | 0.001135 | 1.69E-08 | 337159 | 87690  | 249469 | 1 risk diff | Neale-B_UKBB_EUR_2017             |
| rs6843738  | Treatment with blood pressure medication                            | Neale B | UKBB     | European | 2017 | -0.00675 | 0.001349 | 5.70E-07 | 180203 | 31488  | 148715 | 1 risk diff | Neale-B_UKBB_EUR_2017             |
| rs6843738  | Vascular or heart problems diagnosed by doctor: high blood pressure | Neale B | UKBB     | European | 2017 | -0.00652 | 0.001151 | 1.51E-08 | 336683 | 91033  | 245650 | 1 risk diff | Neale-B_UKBB_EUR_2017             |
| rs6922855  | Diastolic blood pressure                                            | Neale B | UKBB     | European | 2017 | 0.01572  | 0.002475 | 2.12E-10 | 317756 | 0      | 317756 | 1 IVNT      | Neale-B_UKBB_EUR_2017             |
| rs6922855  | Self-reported hypertension                                          | Neale B | UKBB     | European | 2017 | 0.004962 | 0.001072 | 3.68E-06 | 337159 | 87690  | 249469 | 1 risk diff | Neale-B_UKBB_EUR_2017             |
| rs6922855  | Vascular or heart problems diagnosed by doctor: high blood pressure | Neale B | UKBB     | European | 2017 | 0.00533  | 0.001087 | 9.38E-07 | 336683 | 91033  | 245650 | 1 risk diff | Neale-B_UKBB_EUR_2017             |
| rs6938239  | Hayfever, allergic rhinitis or eczema                               | Neale B | UKBB     | European | 2017 | 0.006602 | 0.001478 | 7.90E-06 | 336782 | 77891  | 258891 | 1 risk diff | Neale-B_UKBB_EUR_2017             |
| rs7006629  | Qualifications: college or university degree                        | Neale B | UKBB     | European | 2017 | 0.005403 | 0.001139 | 2.10E-06 | 334070 | 106305 | 227765 | 1 risk diff | Neale-B_UKBB_EUR_2017             |
| rs398015   | Systolic blood pressure                                             | Neale B | UKBB     | European | 2017 | -0.01348 | 0.002711 | 6.57E-07 | 317754 | 0      | 317754 | 1 IVNT      | Neale-B_UKBB_EUR_2017             |
| rs398015   | Treatment with simvastatin                                          | Neale B | UKBB     | European | 2017 | -0.00405 | 0.000848 | 1.81E-06 | 337159 | 38492  | 298667 | 1 risk diff | Neale-B_UKBB_EUR_2017             |
| rs7122539  | Qualifications: college or university degree                        | Neale B | UKBB     | European | 2017 | -0.00553 | 0.001206 | 4.62E-06 | 334070 | 106305 | 227765 | 1 risk diff | Neale-B_UKBB_EUR_2017             |
| rs7123876  | Fasting glucose                                                     | MAGIC   | 22885924 | European | 2012 | -0.011   | 0.0024   | 3.55E-06 | 133010 | 0      | 133010 | 66 mmol/l   | MAGIC_FG-METABO_EUR_2012          |
| rs7123876  | Years of educational attainment                                     | SSGAC   | 27225129 | European | 2016 | -0.013   | 0.003    | 3.26E-06 | 328917 | 0      | 328917 | 64 years    | SSGAC_EduYears_EUR_2016           |
| rs7131262  | Diastolic blood pressure                                            | Neale B | UKBB     | European | 2017 | 0.01317  | 0.002724 | 1.34E-06 | 317756 | 0      | 317756 | 1 IVNT      | Neale-B_UKBB_EUR_2017             |
| rs7185232  | Qualifications: college or university degree                        | Neale B | UKBB     | European | 2017 | -0.00754 | 0.001206 | 4.04E-10 | 334070 | 106305 | 227765 | 1 risk diff | Neale-B_UKBB_EUR_2017             |
| rs7217226  | Self-reported hypertension                                          | Neale B | UKBB     | European | 2017 | 0.004957 | 0.001115 | 8.77E-06 | 337159 | 87690  | 249469 | 1 risk diff | Neale-B_UKBB_EUR_2017             |
| rs7217226  | Vascular or heart problems diagnosed by doctor: high blood pressure | Neale B | UKBB     | European | 2017 | 0.005399 | 0.00113  | 1.79E-06 | 336683 | 91033  | 245650 | 1 risk diff | Neale-B_UKBB_EUR_2017             |
| rs7243357  | Diabetes diagnosed by doctor                                        | Neale B | UKBB     | European | 2017 | -0.00324 | 0.000687 | 2.32E-06 | 336473 | 16183  | 320290 | 1 risk diff | Neale-B_UKBB_EUR_2017             |
| rs7334078  | Years of education                                                  | SSGAC   | 23722424 | European | 2013 | NA       | NA       | 1.40E-06 | 101069 | -      | -      | -           | GRASP                             |
| rs7334078  | Qualifications: college or university degree                        | Neale B | UKBB     | European | 2017 | 0.006198 | 0.001264 | 9.39E-07 | 334070 | 106305 | 227765 | 1 risk diff | Neale-B_UKBB_EUR_2017             |
| rs7334078  | Years of educational attainment                                     | SSGAC   | 23722424 | European | 2013 | 0.021    | 0.004    | 1.40E-06 | 101069 | 0      | 101069 | 42 years    | SSGAC_EduYears_EUR_2013           |
| rs7334078  | Years of educational attainment                                     | SSGAC   | 27225129 | European | 2016 | 0.015    | 0.003    | 1.10E-07 | 328917 | 0      | 328917 | 64 years    | SSGAC_EduYears_EUR_2016           |
| rs7377083  | Type II diabetes                                                    | DIAGRAM | 28566273 | European | 2017 | 0.06     | 0.013    | 9.30E-06 | 159208 | 26676  | 132532 | 18 log OR   | DIAGRAM_T2D_EUR_2017              |

|             |                                                                  |            |          |          |      |          |          |          |        |        |        |    |           |                                      |
|-------------|------------------------------------------------------------------|------------|----------|----------|------|----------|----------|----------|--------|--------|--------|----|-----------|--------------------------------------|
| rs11039798  | Diastolic blood pressure                                         | Neale B    | UKBB     | European | 2017 | -0.01728 | 0.003666 | 2.43E-06 | 317756 | 0      | 317756 | 1  | IVNT      | Neale-B_UKBB_EUR_2017                |
| rs11039798  | Illnesses of siblings: high blood pressure                       | Neale B    | UKBB     | European | 2017 | -0.00791 | 0.00165  | 1.67E-06 | 262361 | 54270  | 208091 | 1  | risk diff | Neale-B_UKBB_EUR_2017                |
| rs11039798  | Self-reported hypertension                                       | Neale B    | UKBB     | European | 2017 | -0.01202 | 0.001588 | 3.67E-14 | 337159 | 87690  | 249469 | 1  | risk diff | Neale-B_UKBB_EUR_2017                |
| rs11039798  | Systolic blood pressure                                          | Neale B    | UKBB     | European | 2017 | -0.01962 | 0.003664 | 8.57E-08 | 317754 | 0      | 317754 | 1  | IVNT      | Neale-B_UKBB_EUR_2017                |
| rs11039798  | Treatment with blood pressure medication                         | Neale B    | UKBB     | European | 2017 | -0.00843 | 0.001884 | 7.70E-06 | 180203 | 31488  | 148715 | 1  | risk diff | Neale-B_UKBB_EUR_2017                |
| rs11039798  | Vascular or heart problems diagnosed by doctor: high blood pres  | Neale B    | UKBB     | European | 2017 | -0.01201 | 0.00161  | 8.41E-14 | 336683 | 91033  | 245650 | 1  | risk diff | Neale-B_UKBB_EUR_2017                |
| rs7531118   | Qualifications: college or university degree                     | Neale B    | UKBB     | European | 2017 | 0.008878 | 0.000149 | 1.09E-14 | 334070 | 106305 | 227765 | 1  | risk diff | Neale-B_UKBB_EUR_2017                |
| rs7531118   | Qualifications: none                                             | Neale B    | UKBB     | European | 2017 | -0.00434 | 0.000931 | 3.13E-06 | 334070 | 57567  | 276503 | 1  | risk diff | Neale-B_UKBB_EUR_2017                |
| rs7531118   | Qualifications: other professional qualifications                | Neale B    | UKBB     | European | 2017 | 0.005436 | 0.001122 | 1.27E-06 | 334070 | 97524  | 236546 | 1  | risk diff | Neale-B_UKBB_EUR_2017                |
| rs7531118   | Vascular or heart problems diagnosed by doctor: high blood pres  | Neale B    | UKBB     | European | 2017 | 0.005382 | 0.00109  | 7.86E-07 | 336683 | 91033  | 245650 | 1  | risk diff | Neale-B_UKBB_EUR_2017                |
| rs7531118   | Years of educational attainment                                  | SSGAC      | 27225129 | European | 2016 | 0.012    | 0.003    | 1.84E-06 | 328917 | 0      | 328917 | 64 | years     | SSGAC_EduYears_EUR_2016              |
| rs115590225 | Diastolic blood pressure                                         | Neale B    | UKBB     | European | 2017 | 0.02306  | 0.004818 | 1.70E-06 | 317756 | 0      | 317756 | 1  | IVNT      | Neale-B_UKBB_EUR_2017                |
| rs9905385   | Systolic blood pressure                                          | Neale B    | UKBB     | European | 2017 | -0.01301 | 0.002624 | 7.17E-07 | 317754 | 0      | 317754 | 1  | IVNT      | Neale-B_UKBB_EUR_2017                |
| rs7607369   | Qualifications: A levels or as levels or equivalent              | Neale B    | UKBB     | European | 2017 | -0.00508 | 0.001101 | 3.89E-06 | 334070 | 91710  | 242360 | 1  | risk diff | Neale-B_UKBB_EUR_2017                |
| rs769674    | Current employment status: unable to work because of sickness (  | Neale B    | UKBB     | European | 2017 | -0.00247 | 0.000493 | 5.58E-07 | 336252 | 12554  | 323698 | 1  | risk diff | Neale-B_UKBB_EUR_2017                |
| rs769674    | Years of educational attainment                                  | SSGAC      | 27225129 | European | 2016 | 0.014    | 0.003    | 2.38E-07 | 328917 | 0      | 328917 | 64 | years     | SSGAC_EduYears_EUR_2016              |
| rs7711753   | Diastolic blood pressure                                         | Neale B    | UKBB     | European | 2017 | 0.01636  | 0.002483 | 4.42E-11 | 317756 | 0      | 317756 | 1  | IVNT      | Neale-B_UKBB_EUR_2017                |
| rs7965658   | Systolic blood pressure                                          | Neale B    | UKBB     | European | 2017 | -0.0154  | 0.003114 | 7.58E-07 | 317754 | 0      | 317754 | 1  | IVNT      | Neale-B_UKBB_EUR_2017                |
| rs799449    | Years of educational attainment                                  | SSGAC      | 27225129 | European | 2016 | 0.011    | 0.002    | 4.69E-06 | 328917 | 0      | 328917 | 64 | years     | SSGAC_EduYears_EUR_2016              |
| rs8047395   | Type II diabetes                                                 | DIAGRAM    | 26551672 | European | 2015 | 0.1213   | 0.01266  | 8.10E-22 | 84780  | 27206  | 57574  | 23 | log OR    | DIAGRAM_T2D-METABO_EUR_2015          |
| rs8047395   | Type II diabetes                                                 | DIAGRAM    | 22885922 | European | 2012 | 0.1044   | 0.01839  | 7.30E-08 | 63390  | 9580   | 53810  | 12 | log OR    | DIAGRAM_T2D_EUR_2012                 |
| rs8047395   | Type II diabetes                                                 | DIAGRAM    | 28566273 | European | 2017 | 0.1      | 0.012    | 3.20E-16 | 159208 | 26676  | 132532 | 18 | log OR    | DIAGRAM_T2D_EUR_2017                 |
| rs8047395   | Type II diabetes                                                 | DIAGRAM    | 24509480 | Mixed    | 2014 | 0.07696  | 0.01418  | 1.80E-07 | 110452 | 26488  | 83964  | 4  | log OR    | DIAGRAM_T2D_Mixed_2014               |
| rs8047395   | Diabetes diagnosed by doctor                                     | Neale B    | UKBB     | European | 2017 | 0.004025 | 0.000522 | 1.25E-14 | 336473 | 16183  | 320290 | 1  | risk diff | Neale-B_UKBB_EUR_2017                |
| rs8047395   | Illnesses of father: diabetes                                    | Neale B    | UKBB     | European | 2017 | 0.003551 | 0.000758 | 2.81E-06 | 293407 | 28197  | 265210 | 1  | risk diff | Neale-B_UKBB_EUR_2017                |
| rs8047395   | Illnesses of siblings: high blood pressure                       | Neale B    | UKBB     | European | 2017 | 0.005355 | 0.001109 | 1.38E-06 | 262361 | 54270  | 208091 | 1  | risk diff | Neale-B_UKBB_EUR_2017                |
| rs8047395   | Self-reported diabetes                                           | Neale B    | UKBB     | European | 2017 | 0.003339 | 0.000473 | 1.73E-12 | 337159 | 13243  | 323916 | 1  | risk diff | Neale-B_UKBB_EUR_2017                |
| rs8047395   | Self-reported hypertension                                       | Neale B    | UKBB     | European | 2017 | 0.006877 | 0.001068 | 1.21E-10 | 337159 | 87690  | 249469 | 1  | risk diff | Neale-B_UKBB_EUR_2017                |
| rs8047395   | Systolic blood pressure                                          | Neale B    | UKBB     | European | 2017 | 0.01092  | 0.002466 | 9.59E-06 | 317754 | 0      | 317754 | 1  | IVNT      | Neale-B_UKBB_EUR_2017                |
| rs8047395   | Treatment with blood pressure medication                         | Neale B    | UKBB     | European | 2017 | 0.006135 | 0.001267 | 1.27E-06 | 180203 | 31488  | 148715 | 1  | risk diff | Neale-B_UKBB_EUR_2017                |
| rs8047395   | Vascular or heart problems diagnosed by doctor: high blood pres  | Neale B    | UKBB     | European | 2017 | 0.00677  | 0.001083 | 4.06E-10 | 336683 | 91033  | 245650 | 1  | risk diff | Neale-B_UKBB_EUR_2017                |
| rs8070454   | Allergic disease                                                 | Ferreira M | 29083406 | European | 2017 | -0.0388  | 0.0058   | 2.97E-11 | 360838 | 180129 | 180709 | 13 | log OR    | Ferreira-M_Allergic-Disease_EUR_2017 |
| rs8070454   | Asthma                                                           | GABRIEL    | 20860503 | European | 2010 | -0.1054  | 0.02037  | 2.28E-07 | 26475  | 10365  | 16110  | 24 | log OR    | GABRIEL_Asthma_EUR_2010              |
| rs8070454   | Asthma                                                           | GABRIEL    | 20860503 | European | 2010 | NA       | NA       | 2.28E-07 | 26475  | -      | -      | -  | -         | GRASP                                |
| rs8070454   | Asthma childhood and later onset                                 | GABRIEL    | 20860503 | European | 2010 | NA       | NA       | 1.99E-06 | 26475  | -      | -      | -  | -         | GRASP                                |
| rs8070454   | Asthma childhood later and unknown onset and severe and indus    | GABRIEL    | 20860503 | European | 2010 | NA       | NA       | 2.28E-07 | 26475  | -      | -      | -  | -         | GRASP                                |
| rs8070454   | Asthma childhood later and unknown onset and severe asthma       | GABRIEL    | 20860503 | European | 2010 | NA       | NA       | 3.29E-07 | 26475  | -      | -      | -  | -         | GRASP                                |
| rs8070454   | Asthma childhood onset                                           | GABRIEL    | 20860503 | European | 2010 | NA       | NA       | 6.60E-08 | 26475  | -      | -      | -  | -         | GRASP                                |
| rs8070454   | Asthma                                                           | Neale B    | UKBB     | European | 2017 | -0.00627 | 0.000798 | 4.03E-15 | 336782 | 38791  | 297991 | 1  | risk diff | Neale-B_UKBB_EUR_2017                |
| rs8070454   | Doctor diagnosed asthma                                          | Neale B    | UKBB     | European | 2017 | -0.008   | 0.001672 | 1.73E-06 | 83529  | 10589  | 72940  | 1  | risk diff | Neale-B_UKBB_EUR_2017                |
| rs8070454   | Hayfever, allergic rhinitis or eczema                            | Neale B    | UKBB     | European | 2017 | -0.0055  | 0.001053 | 1.76E-07 | 336782 | 77891  | 258891 | 1  | risk diff | Neale-B_UKBB_EUR_2017                |
| rs8070454   | No blood clot, bronchitis, emphysema, asthma, rhinitis, eczema o | Neale B    | UKBB     | European | 2017 | 0.008389 | 0.001167 | 6.47E-13 | 336782 | 228530 | 108252 | 1  | risk diff | Neale-B_UKBB_EUR_2017                |
| rs8070454   | Self-reported asthma                                             | Neale B    | UKBB     | European | 2017 | -0.00647 | 0.0008   | 5.96E-16 | 337159 | 39049  | 298110 | 1  | risk diff | Neale-B_UKBB_EUR_2017                |
| rs8070454   | Wheeze or whistling in the chest in last year                    | Neale B    | UKBB     | European | 2017 | -0.00494 | 0.00102  | 1.28E-06 | 331257 | 68531  | 262726 | 1  | risk diff | Neale-B_UKBB_EUR_2017                |
| rs8070454   | Asthma                                                           | TAGC       | 29273806 | European | 2018 | -0.1057  | 0.01273  | 1.04E-16 | 127669 | 19954  | 107715 | 56 | log OR    | TAGC_Asthma_EUR_2018                 |
| rs8070454   | Asthma                                                           | TAGC       | 29273806 | Mixed    | 2018 | -0.09901 | 0.01191  | 9.29E-17 | 142486 | 23948  | 118538 | 66 | log OR    | TAGC_Asthma_Mixed_2018               |
| rs8075273   | Qualifications: college or university degree                     | Neale B    | UKBB     | European | 2017 | 0.005734 | 0.001276 | 7.02E-06 | 334070 | 106305 | 227765 | 1  | risk diff | Neale-B_UKBB_EUR_2017                |
| rs8097544   | Self-reported hypertension                                       | Neale B    | UKBB     | European | 2017 | -0.00705 | 0.001518 | 3.39E-06 | 337159 | 87690  | 249469 | 1  | risk diff | Neale-B_UKBB_EUR_2017                |
| rs8097544   | Vascular or heart problems diagnosed by doctor: high blood pres  | Neale B    | UKBB     | European | 2017 | -0.00705 | 0.001538 | 4.65E-06 | 336683 | 91033  | 245650 | 1  | risk diff | Neale-B_UKBB_EUR_2017                |
| rs8102137   | Diastolic blood pressure                                         | Neale B    | UKBB     | European | 2017 | 0.02299  | 0.002618 | 1.61E-18 | 317756 | 0      | 317756 | 1  | IVNT      | Neale-B_UKBB_EUR_2017                |
| rs8102137   | Self-reported hypertension                                       | Neale B    | UKBB     | European | 2017 | 0.005083 | 0.001134 | 7.34E-06 | 337159 | 87690  | 249469 | 1  | risk diff | Neale-B_UKBB_EUR_2017                |
| rs8102137   | Vascular or heart problems diagnosed by doctor: high blood pres  | Neale B    | UKBB     | European | 2017 | 0.005486 | 0.001149 | 1.81E-06 | 336683 | 91033  | 245650 | 1  | risk diff | Neale-B_UKBB_EUR_2017                |
| rs820077    | Asthma                                                           | Neale B    | UKBB     | European | 2017 | 0.004737 | 0.000973 | 1.13E-06 | 336782 | 38791  | 297991 | 1  | risk diff | Neale-B_UKBB_EUR_2017                |
| rs820077    | Self-reported asthma                                             | Neale B    | UKBB     | European | 2017 | 0.004942 | 0.000975 | 3.99E-07 | 337159 | 39049  | 298110 | 1  | risk diff | Neale-B_UKBB_EUR_2017                |
| rs853679    | Asthma                                                           | Neale B    | UKBB     | European | 2017 | -0.00494 | 0.001048 | 2.47E-06 | 336782 | 38791  | 297991 | 1  | risk diff | Neale-B_UKBB_EUR_2017                |
| rs853679    | Diabetes diagnosed by doctor                                     | Neale B    | UKBB     | European | 2017 | -0.00317 | 0.000702 | 6.41E-06 | 336473 | 16183  | 320290 | 1  | risk diff | Neale-B_UKBB_EUR_2017                |
| rs853679    | Diastolic blood pressure                                         | Neale B    | UKBB     | European | 2017 | 0.01864  | 0.003316 | 1.92E-08 | 317756 | 0      | 317756 | 1  | IVNT      | Neale-B_UKBB_EUR_2017                |
| rs853679    | Self-reported asthma                                             | Neale B    | UKBB     | European | 2017 | -0.00469 | 0.00105  | 7.96E-06 | 337159 | 39049  | 298110 | 1  | risk diff | Neale-B_UKBB_EUR_2017                |
| rs853679    | Treatment with insulin                                           | Neale B    | UKBB     | European | 2017 | -0.00188 | 0.000391 | 1.48E-06 | 180203 | 1377   | 178826 | 1  | risk diff | Neale-B_UKBB_EUR_2017                |

|            |                                                                 |         |          |          |      |          |          |          |        |        |        |             |                             |
|------------|-----------------------------------------------------------------|---------|----------|----------|------|----------|----------|----------|--------|--------|--------|-------------|-----------------------------|
| rs853679   | Treatment with insulin product                                  | Neale B | UKBB     | European | 2017 | -0.00234 | 0.000324 | 4.99E-13 | 337159 | 3319   | 333840 | 1 risk diff | Neale-B_UKBB_EUR_2017       |
| rs8567     | Vascular or heart problems diagnosed by doctor: high blood pres | Neale B | UKBB     | European | 2017 | -0.00481 | 0.001083 | 8.85E-06 | 336683 | 91033  | 245650 | 1 risk diff | Neale-B_UKBB_EUR_2017       |
| rs879620   | Diastolic blood pressure                                        | Neale B | UKBB     | European | 2017 | 0.01407  | 0.002539 | 2.99E-08 | 317756 | 0      | 317756 | 1 IVNT      | Neale-B_UKBB_EUR_2017       |
| rs889398   | Diabetes diagnosed by doctor                                    | Neale B | UKBB     | European | 2017 | -0.00301 | 0.000531 | 1.45E-08 | 336473 | 16183  | 320290 | 1 risk diff | Neale-B_UKBB_EUR_2017       |
| rs889398   | Past tobacco smoking                                            | Neale B | UKBB     | European | 2017 | 0.01623  | 0.003228 | 4.98E-07 | 310749 | 0      | 310749 | 1 -         | Neale-B_UKBB_EUR_2017       |
| rs889398   | Self-reported diabetes                                          | Neale B | UKBB     | European | 2017 | -0.00261 | 0.000482 | 5.76E-08 | 337159 | 13243  | 323916 | 1 risk diff | Neale-B_UKBB_EUR_2017       |
| rs900144   | Diastolic blood pressure                                        | Neale B | UKBB     | European | 2017 | 0.01386  | 0.002484 | 2.41E-08 | 317756 | 0      | 317756 | 1 IVNT      | Neale-B_UKBB_EUR_2017       |
| rs900144   | Self-reported hypertension                                      | Neale B | UKBB     | European | 2017 | 0.005249 | 0.001075 | 1.05E-06 | 337159 | 87690  | 249469 | 1 risk diff | Neale-B_UKBB_EUR_2017       |
| rs900144   | Systolic blood pressure                                         | Neale B | UKBB     | European | 2017 | 0.01241  | 0.002483 | 5.78E-07 | 317754 | 0      | 317754 | 1 IVNT      | Neale-B_UKBB_EUR_2017       |
| rs900144   | Vascular or heart problems diagnosed by doctor: high blood pres | Neale B | UKBB     | European | 2017 | 0.005017 | 0.00109  | 4.19E-06 | 336683 | 91033  | 245650 | 1 risk diff | Neale-B_UKBB_EUR_2017       |
| rs13194250 | Diastolic blood pressure                                        | Neale B | UKBB     | European | 2017 | 0.01313  | 0.002482 | 1.23E-07 | 317756 | 0      | 317756 | 1 IVNT      | Neale-B_UKBB_EUR_2017       |
| rs13194250 | Exposure to tobacco smoke outside home                          | Neale B | UKBB     | European | 2017 | 0.007214 | 0.001494 | 1.37E-06 | 286550 | 0      | 286550 | 1 -         | Neale-B_UKBB_EUR_2017       |
| rs13194250 | Qualifications: A levels or as levels or equivalent             | Neale B | UKBB     | European | 2017 | -0.00803 | 0.001101 | 2.93E-13 | 334070 | 91710  | 242360 | 1 risk diff | Neale-B_UKBB_EUR_2017       |
| rs13194250 | Qualifications: CSEs or equivalent                              | Neale B | UKBB     | European | 2017 | 0.005261 | 0.000837 | 3.31E-10 | 334070 | 44362  | 289708 | 1 risk diff | Neale-B_UKBB_EUR_2017       |
| rs13194250 | Qualifications: O levels or GCSEs or equivalent                 | Neale B | UKBB     | European | 2017 | -0.00546 | 0.001229 | 8.97E-06 | 334070 | 159730 | 174340 | 1 risk diff | Neale-B_UKBB_EUR_2017       |
| rs13194250 | Qualifications: college or university degree                    | Neale B | UKBB     | European | 2017 | -0.01217 | 0.001148 | 3.01E-26 | 334070 | 106305 | 227765 | 1 risk diff | Neale-B_UKBB_EUR_2017       |
| rs13194250 | Qualifications: none                                            | Neale B | UKBB     | European | 2017 | 0.006648 | 0.000931 | 9.34E-13 | 334070 | 57567  | 276503 | 1 risk diff | Neale-B_UKBB_EUR_2017       |
| rs13194250 | Years of educational attainment in females                      | SSGAC   | 27225129 | European | 2016 | -0.019   | 0.003    | 8.16E-09 | 181443 | 0      | 181443 | 62 years    | SSGAC_EduYears-F_EUR_2016   |
| rs13194250 | Years of educational attainment in males                        | SSGAC   | 27225129 | European | 2016 | -0.022   | 0.004    | 4.23E-09 | 147474 | 0      | 147474 | 6 years     | SSGAC_EduYears-M_EUR_2016   |
| rs13194250 | Years of educational attainment                                 | SSGAC   | 27225129 | European | 2016 | -0.02    | 0.002    | 2.77E-15 | 328917 | 0      | 328917 | 64 years    | SSGAC_EduYears_EUR_2016     |
| rs903959   | Qualifications: college or university degree                    | Neale B | UKBB     | European | 2017 | -0.00782 | 0.001164 | 1.86E-11 | 334070 | 106305 | 227765 | 1 risk diff | Neale-B_UKBB_EUR_2017       |
| rs903959   | Years of educational attainment in females                      | SSGAC   | 27225129 | European | 2016 | -0.021   | 0.003    | 3.57E-10 | 181443 | 0      | 181443 | 62 years    | SSGAC_EduYears-F_EUR_2016   |
| rs903959   | Years of educational attainment                                 | SSGAC   | 27225129 | European | 2016 | -0.016   | 0.003    | 3.35E-10 | 328917 | 0      | 328917 | 64 years    | SSGAC_EduYears_EUR_2016     |
| rs905938   | Hayfever, allergic rhinitis or eczema                           | Neale B | UKBB     | European | 2017 | 0.005435 | 0.001162 | 2.88E-06 | 336782 | 77891  | 258891 | 1 risk diff | Neale-B_UKBB_EUR_2017       |
| rs919433   | Hayfever, allergic rhinitis or eczema                           | Neale B | UKBB     | European | 2017 | -0.00644 | 0.001071 | 1.83E-09 | 336782 | 77891  | 258891 | 1 risk diff | Neale-B_UKBB_EUR_2017       |
| rs9460306  | Qualifications: college or university degree                    | Neale B | UKBB     | European | 2017 | 0.01038  | 0.00204  | 3.60E-07 | 334070 | 106305 | 227765 | 1 risk diff | Neale-B_UKBB_EUR_2017       |
| rs9527706  | Qualifications: A levels or as levels or equivalent             | Neale B | UKBB     | European | 2017 | 0.007632 | 0.001227 | 4.91E-10 | 334070 | 91710  | 242360 | 1 risk diff | Neale-B_UKBB_EUR_2017       |
| rs9527706  | Qualifications: college or university degree                    | Neale B | UKBB     | European | 2017 | 0.01092  | 0.001279 | 1.42E-17 | 334070 | 106305 | 227765 | 1 risk diff | Neale-B_UKBB_EUR_2017       |
| rs9527706  | Qualifications: none                                            | Neale B | UKBB     | European | 2017 | -0.0071  | 0.001037 | 7.65E-12 | 334070 | 57567  | 276503 | 1 risk diff | Neale-B_UKBB_EUR_2017       |
| rs9527706  | Years of educational attainment in females                      | SSGAC   | 27225129 | European | 2016 | 0.026    | 0.004    | 3.11E-12 | 181443 | 0      | 181443 | 62 years    | SSGAC_EduYears-F_EUR_2016   |
| rs9527706  | Years of educational attainment in males                        | SSGAC   | 27225129 | European | 2016 | 0.02     | 0.004    | 1.01E-06 | 147474 | 0      | 147474 | 6 years     | SSGAC_EduYears-M_EUR_2016   |
| rs9527706  | Years of educational attainment                                 | SSGAC   | 27225129 | European | 2016 | 0.022    | 0.003    | 1.18E-15 | 328917 | 0      | 328917 | 64 years    | SSGAC_EduYears_EUR_2016     |
| rs954018   | Systolic blood pressure                                         | Neale B | UKBB     | European | 2017 | 0.01641  | 0.002685 | 9.75E-10 | 317754 | 0      | 317754 | 1 IVNT      | Neale-B_UKBB_EUR_2017       |
| rs73455661 | Diabetes diagnosed by doctor                                    | Neale B | UKBB     | European | 2017 | -0.00284 | 0.00058  | 9.66E-07 | 336473 | 16183  | 320290 | 1 risk diff | Neale-B_UKBB_EUR_2017       |
| rs10954284 | Type II diabetes                                                | DIAGRAM | 22885922 | European | 2012 | -0.09531 | 0.01617  | 1.20E-08 | 69033  | 12171  | 56862  | 12 log OR   | DIAGRAM_T2D_EUR_2012        |
| rs10954284 | Diabetes diagnosed by doctor                                    | Neale B | UKBB     | European | 2017 | -0.00241 | 0.000521 | 3.81E-06 | 336473 | 16183  | 320290 | 1 risk diff | Neale-B_UKBB_EUR_2017       |
| rs10954284 | Self-reported hypertension                                      | Neale B | UKBB     | European | 2017 | -0.00661 | 0.001066 | 5.52E-10 | 337159 | 87690  | 249469 | 1 risk diff | Neale-B_UKBB_EUR_2017       |
| rs10954284 | Treatment with blood pressure medication                        | Neale B | UKBB     | European | 2017 | -0.00879 | 0.001266 | 3.98E-12 | 180203 | 31488  | 148715 | 1 risk diff | Neale-B_UKBB_EUR_2017       |
| rs10954284 | Treatment with simvastatin                                      | Neale B | UKBB     | European | 2017 | -0.00355 | 0.000771 | 4.18E-06 | 337159 | 38492  | 298667 | 1 risk diff | Neale-B_UKBB_EUR_2017       |
| rs10954284 | Vascular or heart problems diagnosed by doctor: high blood pres | Neale B | UKBB     | European | 2017 | -0.00671 | 0.001081 | 5.49E-10 | 336683 | 91033  | 245650 | 1 risk diff | Neale-B_UKBB_EUR_2017       |
| rs987237   | Diabetes diagnosed by doctor                                    | Neale B | UKBB     | European | 2017 | -0.0037  | 0.000681 | 5.67E-08 | 336473 | 16183  | 320290 | 1 risk diff | Neale-B_UKBB_EUR_2017       |
| rs987237   | Self-reported diabetes                                          | Neale B | UKBB     | European | 2017 | -0.00313 | 0.000617 | 4.04E-07 | 337159 | 13243  | 323916 | 1 risk diff | Neale-B_UKBB_EUR_2017       |
| rs9931494  | Type II diabetes                                                | DIAGRAM | 26551672 | European | 2015 | -0.1275  | 0.0128   | 1.70E-23 | 84780  | 27206  | 57574  | 23 log OR   | DIAGRAM_T2D-METABO_EUR_2015 |
| rs9931494  | Type II diabetes                                                | DIAGRAM | 22885922 | European | 2012 | -0.1133  | 0.01823  | 6.80E-10 | 63390  | 9580   | 53810  | 12 log OR   | DIAGRAM_T2D_EUR_2012        |
| rs9931494  | Type II diabetes                                                | DIAGRAM | 28566273 | European | 2017 | -0.12    | 0.012    | 1.00E-22 | 159208 | 26676  | 132532 | 18 log OR   | DIAGRAM_T2D_EUR_2017        |
| rs9931494  | Type II diabetes                                                | DIAGRAM | 24509480 | Mixed    | 2014 | -0.08618 | 0.01165  | 3.70E-11 | 110452 | 26488  | 83964  | 4 log OR    | DIAGRAM_T2D_Mixed_2014      |
| rs9931494  | Diabetes diagnosed by doctor                                    | Neale B | UKBB     | European | 2017 | -0.00486 | 0.000529 | 4.33E-20 | 336473 | 16183  | 320290 | 1 risk diff | Neale-B_UKBB_EUR_2017       |
| rs9931494  | Illnesses of father: diabetes                                   | Neale B | UKBB     | European | 2017 | -0.00389 | 0.000769 | 4.32E-07 | 293407 | 28197  | 265210 | 1 risk diff | Neale-B_UKBB_EUR_2017       |
| rs9931494  | Illnesses of mother: diabetes                                   | Neale B | UKBB     | European | 2017 | -0.00373 | 0.00074  | 4.58E-07 | 309953 | 28875  | 281078 | 1 risk diff | Neale-B_UKBB_EUR_2017       |
| rs9931494  | Illnesses of siblings: high blood pressure                      | Neale B | UKBB     | European | 2017 | -0.00498 | 0.001124 | 9.31E-06 | 262361 | 54270  | 208091 | 1 risk diff | Neale-B_UKBB_EUR_2017       |
| rs9931494  | Self-reported diabetes                                          | Neale B | UKBB     | European | 2017 | -0.00386 | 0.00048  | 8.34E-16 | 337159 | 13243  | 323916 | 1 risk diff | Neale-B_UKBB_EUR_2017       |
| rs9931494  | Self-reported hypertension                                      | Neale B | UKBB     | European | 2017 | -0.00758 | 0.001083 | 2.54E-12 | 337159 | 87690  | 249469 | 1 risk diff | Neale-B_UKBB_EUR_2017       |
| rs9931494  | Treatment with blood pressure medication                        | Neale B | UKBB     | European | 2017 | -0.00714 | 0.001286 | 2.85E-08 | 180203 | 31488  | 148715 | 1 risk diff | Neale-B_UKBB_EUR_2017       |
| rs9931494  | Treatment with gliclazide                                       | Neale B | UKBB     | European | 2017 | -0.001   | 0.000225 | 8.46E-06 | 337159 | 2807   | 334352 | 1 risk diff | Neale-B_UKBB_EUR_2017       |
| rs9931494  | Vascular or heart problems diagnosed by doctor: high blood pres | Neale B | UKBB     | European | 2017 | -0.00747 | 0.001098 | 1.00E-11 | 336683 | 91033  | 245650 | 1 risk diff | Neale-B_UKBB_EUR_2017       |
| rs998584   | Diastolic blood pressure                                        | BPExome | 27618447 | Mixed    | 2016 | NA       | NA       | 3.87E-06 | 192763 | 0      | 192763 | 51 INVT     | BPExome_DBP_Mixed_2016      |
| rs998584   | Self-reported hypertension                                      | Neale B | UKBB     | European | 2017 | -0.00474 | 0.001069 | 9.17E-06 | 337159 | 87690  | 249469 | 1 risk diff | Neale-B_UKBB_EUR_2017       |
| rs998584   | Treatment with simvastatin                                      | Neale B | UKBB     | European | 2017 | -0.0036  | 0.000773 | 3.10E-06 | 337159 | 38492  | 298667 | 1 risk diff | Neale-B_UKBB_EUR_2017       |
| rs998584   | Vascular or heart problems diagnosed by doctor: high blood pres | Neale B | UKBB     | European | 2017 | -0.00501 | 0.001084 | 3.72E-06 | 336683 | 91033  | 245650 | 1 risk diff | Neale-B_UKBB_EUR_2017       |



|            |                                                                             |         |          |          |      |          |          |          |        |        |        |    |           |                                   |
|------------|-----------------------------------------------------------------------------|---------|----------|----------|------|----------|----------|----------|--------|--------|--------|----|-----------|-----------------------------------|
| rs12146443 | Type II diabetes                                                            | DIAGRAM | 26551672 | European | 2015 | -0.07511 | 0.01301  | 5.50E-09 | 84780  | 27206  | 57574  | 23 | log OR    | DIAGRAM_T2D-METABO_EUR_2015       |
| rs12146443 | Type II diabetes adjusted for BMI                                           | DIAGRAM | 28566273 | European | 2017 | -0.074   | 0.015    | 5.30E-07 | 159208 | 26676  | 132532 | 18 | log OR    | DIAGRAM_T2D-adjusted-BMI_EUR_2017 |
| rs12146443 | Type II diabetes                                                            | DIAGRAM | 28566273 | European | 2017 | -0.061   | 0.012    | 7.90E-07 | 159208 | 26676  | 132532 | 18 | log OR    | DIAGRAM_T2D_EUR_2017              |
| rs12146443 | Diabetes diagnosed by doctor                                                | Neale B | UKBB     | European | 2017 | -0.00319 | 0.000536 | 2.61E-09 | 336473 | 16183  | 320290 | 1  | risk diff | Neale-B_UKBB_EUR_2017             |
| rs12146443 | Forced expiratory volume in 1-second, predicted                             | Neale B | UKBB     | European | 2017 | -0.01264 | 0.002801 | 6.44E-06 | 110423 | 0      | 110423 | 1  | IVNT      | Neale-B_UKBB_EUR_2017             |
| rs12146443 | Self-reported diabetes                                                      | Neale B | UKBB     | European | 2017 | -0.00306 | 0.000486 | 2.98E-10 | 337159 | 13243  | 323916 | 1  | risk diff | Neale-B_UKBB_EUR_2017             |
| rs12146443 | Systolic blood pressure                                                     | Neale B | UKBB     | European | 2017 | -0.01199 | 0.002531 | 2.17E-06 | 317754 | 0      | 317754 | 1  | IVNT      | Neale-B_UKBB_EUR_2017             |
| rs12146443 | Treatment with metformin                                                    | Neale B | UKBB     | European | 2017 | -0.00191 | 0.00039  | 9.38E-07 | 337159 | 8392   | 328767 | 1  | risk diff | Neale-B_UKBB_EUR_2017             |
| rs13001104 | Ever smoked                                                                 | Neale B | UKBB     | European | 2017 | -0.00578 | 0.001198 | 1.41E-06 | 336067 | 202585 | 133482 | 1  | risk diff | Neale-B_UKBB_EUR_2017             |
| rs13270194 | Diastolic blood pressure                                                    | Neale B | UKBB     | European | 2017 | 0.01616  | 0.002463 | 5.35E-11 | 317756 | 0      | 317756 | 1  | IVNT      | Neale-B_UKBB_EUR_2017             |
| rs13270194 | Forced expiratory volume in 1-second                                        | Neale B | UKBB     | European | 2017 | -0.0096  | 0.002082 | 3.96E-06 | 307638 | 0      | 307638 | 1  | IVNT      | Neale-B_UKBB_EUR_2017             |
| rs13270194 | Peak expiratory flow                                                        | Neale B | UKBB     | European | 2017 | -0.01137 | 0.002163 | 1.48E-07 | 307638 | 0      | 307638 | 1  | IVNT      | Neale-B_UKBB_EUR_2017             |
| rs13270194 | Self-reported hypertension                                                  | Neale B | UKBB     | European | 2017 | 0.005967 | 0.001067 | 2.22E-08 | 337159 | 87690  | 249469 | 1  | risk diff | Neale-B_UKBB_EUR_2017             |
| rs13270194 | Systolic blood pressure                                                     | Neale B | UKBB     | European | 2017 | 0.01458  | 0.002462 | 3.20E-09 | 317754 | 0      | 317754 | 1  | IVNT      | Neale-B_UKBB_EUR_2017             |
| rs13270194 | Treatment with bendroflumethiazide                                          | Neale B | UKBB     | European | 2017 | 0.00279  | 0.000564 | 7.41E-07 | 337159 | 19084  | 318075 | 1  | risk diff | Neale-B_UKBB_EUR_2017             |
| rs13270194 | Treatment with blood pressure medication                                    | Neale B | UKBB     | European | 2017 | 0.006249 | 0.001267 | 8.24E-07 | 180203 | 31488  | 148715 | 1  | risk diff | Neale-B_UKBB_EUR_2017             |
| rs1609906  | Ever smoked                                                                 | Neale B | UKBB     | European | 2017 | 0.005531 | 0.001189 | 3.26E-06 | 336067 | 202585 | 133482 | 1  | risk diff | Neale-B_UKBB_EUR_2017             |
| rs1609906  | Past tobacco smoking                                                        | Neale B | UKBB     | European | 2017 | -0.01772 | 0.003166 | 2.20E-08 | 310749 | 0      | 310749 | 1  | -         | Neale-B_UKBB_EUR_2017             |
| rs1609906  | Smoking status: previous                                                    | Neale B | UKBB     | European | 2017 | 0.005484 | 0.001163 | 2.40E-06 | 336024 | 118419 | 217605 | 1  | risk diff | Neale-B_UKBB_EUR_2017             |
| rs34320273 | Systolic blood pressure                                                     | Neale B | UKBB     | European | 2017 | 0.01431  | 0.003123 | 4.59E-06 | 317754 | 0      | 317754 | 1  | IVNT      | Neale-B_UKBB_EUR_2017             |
| rs35267732 | Psoriasis                                                                   | Neale B | UKBB     | European | 2017 | 0.000923 | 0.000156 | 3.58E-09 | 337199 | 342    | 336857 | 1  | risk diff | Neale-B_UKBB_EUR_2017             |
| rs35267732 | Self-reported psoriasis                                                     | Neale B | UKBB     | European | 2017 | 0.002527 | 0.000524 | 1.39E-06 | 337159 | 3871   | 333288 | 1  | risk diff | Neale-B_UKBB_EUR_2017             |
| rs35267732 | Self-reported psoriatic arthropathy                                         | Neale B | UKBB     | European | 2017 | 0.001386 | 0.000216 | 1.30E-10 | 337159 | 650    | 336509 | 1  | risk diff | Neale-B_UKBB_EUR_2017             |
| rs4766502  | Diastolic blood pressure                                                    | Neale B | UKBB     | European | 2017 | -0.02344 | 0.002918 | 9.47E-16 | 317756 | 0      | 317756 | 1  | IVNT      | Neale-B_UKBB_EUR_2017             |
| rs4766502  | Medication for cholesterol, blood pressure or diabetes: blood pressure      | Neale B | UKBB     | European | 2017 | -0.00824 | 0.001852 | 8.64E-06 | 154702 | 38548  | 116154 | 1  | risk diff | Neale-B_UKBB_EUR_2017             |
| rs4766502  | Self-reported hypertension                                                  | Neale B | UKBB     | European | 2017 | -0.00702 | 0.001264 | 2.86E-08 | 337159 | 87690  | 249469 | 1  | risk diff | Neale-B_UKBB_EUR_2017             |
| rs4766502  | Systolic blood pressure                                                     | Neale B | UKBB     | European | 2017 | -0.0185  | 0.002917 | 2.28E-10 | 317754 | 0      | 317754 | 1  | IVNT      | Neale-B_UKBB_EUR_2017             |
| rs55797265 | Self-reported psoriasis                                                     | Neale B | UKBB     | European | 2017 | 0.00249  | 0.000435 | 1.01E-08 | 337159 | 3871   | 333288 | 1  | risk diff | Neale-B_UKBB_EUR_2017             |
| rs62395851 | Hayfever, allergic rhinitis or eczema                                       | Neale B | UKBB     | European | 2017 | 0.009446 | 0.001921 | 8.84E-07 | 336782 | 77891  | 258891 | 1  | risk diff | Neale-B_UKBB_EUR_2017             |
| rs62395851 | Medication for cholesterol, blood pressure or diabetes: insulin             | Neale B | UKBB     | European | 2017 | -0.00393 | 0.000782 | 5.04E-07 | 154702 | 2116   | 152586 | 1  | risk diff | Neale-B_UKBB_EUR_2017             |
| rs62395851 | No blood clot, bronchitis, emphysema, asthma, rhinitis, eczema or psoriasis | Neale B | UKBB     | European | 2017 | -0.00971 | 0.002129 | 5.09E-06 | 336782 | 228530 | 108252 | 1  | risk diff | Neale-B_UKBB_EUR_2017             |
| rs62395851 | Self-reported psoriasis                                                     | Neale B | UKBB     | European | 2017 | -0.00253 | 0.000486 | 1.93E-07 | 337159 | 3871   | 333288 | 1  | risk diff | Neale-B_UKBB_EUR_2017             |
| rs62395851 | Treatment with insulin product                                              | Neale B | UKBB     | European | 2017 | -0.00241 | 0.00045  | 8.74E-08 | 337159 | 3319   | 333840 | 1  | risk diff | Neale-B_UKBB_EUR_2017             |
| rs6577585  | Medication for cholesterol, blood pressure or diabetes: blood pressure      | Neale B | UKBB     | European | 2017 | 0.009035 | 0.001646 | 4.07E-08 | 154702 | 38548  | 116154 | 1  | risk diff | Neale-B_UKBB_EUR_2017             |
| rs6577585  | Medication for cholesterol, blood pressure or diabetes: cholesterol         | Neale B | UKBB     | European | 2017 | 0.007332 | 0.001606 | 4.97E-06 | 154702 | 35840  | 118862 | 1  | risk diff | Neale-B_UKBB_EUR_2017             |
| rs6577585  | Medication for cholesterol, blood pressure or diabetes: none of the above   | Neale B | UKBB     | European | 2017 | -0.00866 | 0.001795 | 1.43E-06 | 154702 | 103004 | 51698  | 1  | risk diff | Neale-B_UKBB_EUR_2017             |
| rs6577585  | Self-reported hypertension                                                  | Neale B | UKBB     | European | 2017 | 0.005049 | 0.001126 | 7.33E-06 | 337159 | 87690  | 249469 | 1  | risk diff | Neale-B_UKBB_EUR_2017             |
| rs67081976 | Self-reported hypertension                                                  | Neale B | UKBB     | European | 2017 | 0.006714 | 0.001354 | 7.08E-07 | 337159 | 87690  | 249469 | 1  | risk diff | Neale-B_UKBB_EUR_2017             |
| rs7033236  | Forced expiratory volume in 1-second                                        | Neale B | UKBB     | European | 2017 | 0.01028  | 0.002093 | 9.01E-07 | 307638 | 0      | 307638 | 1  | IVNT      | Neale-B_UKBB_EUR_2017             |
| rs7033236  | Forced vital capacity                                                       | Neale B | UKBB     | European | 2017 | 0.01418  | 0.001984 | 8.84E-13 | 307638 | 0      | 307638 | 1  | IVNT      | Neale-B_UKBB_EUR_2017             |
| rs7033236  | Forced vital capacity, best measure                                         | Neale B | UKBB     | European | 2017 | 0.01352  | 0.002177 | 5.27E-10 | 255492 | 0      | 255492 | 1  | IVNT      | Neale-B_UKBB_EUR_2017             |
| rs7974266  | Diastolic blood pressure                                                    | Neale B | UKBB     | European | 2017 | -0.01807 | 0.002681 | 1.61E-11 | 317756 | 0      | 317756 | 1  | IVNT      | Neale-B_UKBB_EUR_2017             |
| rs7974266  | Systolic blood pressure                                                     | Neale B | UKBB     | European | 2017 | -0.01689 | 0.00268  | 2.95E-10 | 317754 | 0      | 317754 | 1  | IVNT      | Neale-B_UKBB_EUR_2017             |
| rs8092496  | Forced expiratory volume in 1-second, predicted                             | Neale B | UKBB     | European | 2017 | 0.01521  | 0.00315  | 1.39E-06 | 110423 | 0      | 110423 | 1  | IVNT      | Neale-B_UKBB_EUR_2017             |
| rs8092496  | Forced expiratory volume in 1-second, predicted percentage                  | Neale B | UKBB     | European | 2017 | -0.02474 | 0.00492  | 4.94E-07 | 110423 | 0      | 110423 | 1  | IVNT      | Neale-B_UKBB_EUR_2017             |
| rs860262   | Type II diabetes                                                            | DIAGRAM | 26551672 | European | 2015 | -0.08434 | 0.01266  | 3.30E-11 | 84780  | 27206  | 57574  | 23 | log OR    | DIAGRAM_T2D-METABO_EUR_2015       |
| rs860262   | Type II diabetes adjusted for BMI                                           | DIAGRAM | 28566273 | European | 2017 | -0.098   | 0.015    | 1.60E-11 | 159208 | 26676  | 132532 | 18 | log OR    | DIAGRAM_T2D-adjusted-BMI_EUR_2017 |
| rs860262   | Type II diabetes                                                            | DIAGRAM | 28566273 | European | 2017 | -0.091   | 0.012    | 5.30E-14 | 159208 | 26676  | 132532 | 18 | log OR    | DIAGRAM_T2D_EUR_2017              |
| rs860262   | Asthma                                                                      | Neale B | UKBB     | European | 2017 | -0.00441 | 0.000778 | 1.48E-08 | 336782 | 38791  | 297991 | 1  | risk diff | Neale-B_UKBB_EUR_2017             |
| rs860262   | Diabetes diagnosed by doctor                                                | Neale B | UKBB     | European | 2017 | -0.0041  | 0.000521 | 3.36E-15 | 336473 | 16183  | 320290 | 1  | risk diff | Neale-B_UKBB_EUR_2017             |
| rs860262   | Forced expiratory volume in 1-second, predicted                             | Neale B | UKBB     | European | 2017 | -0.01537 | 0.002727 | 1.76E-08 | 110423 | 0      | 110423 | 1  | IVNT      | Neale-B_UKBB_EUR_2017             |
| rs860262   | Forced expiratory volume in 1-second, predicted percentage                  | Neale B | UKBB     | European | 2017 | 0.0189   | 0.004259 | 9.06E-06 | 110423 | 0      | 110423 | 1  | IVNT      | Neale-B_UKBB_EUR_2017             |
| rs860262   | Hayfever, allergic rhinitis or eczema                                       | Neale B | UKBB     | European | 2017 | -0.00613 | 0.001026 | 2.38E-09 | 336782 | 77891  | 258891 | 1  | risk diff | Neale-B_UKBB_EUR_2017             |
| rs860262   | No blood clot, bronchitis, emphysema, asthma, rhinitis, eczema or psoriasis | Neale B | UKBB     | European | 2017 | 0.007423 | 0.001137 | 6.70E-11 | 336782 | 228530 | 108252 | 1  | risk diff | Neale-B_UKBB_EUR_2017             |
| rs860262   | Self-reported asthma                                                        | Neale B | UKBB     | European | 2017 | -0.00436 | 0.000779 | 2.26E-08 | 337159 | 39049  | 298110 | 1  | risk diff | Neale-B_UKBB_EUR_2017             |
| rs860262   | Self-reported diabetes                                                      | Neale B | UKBB     | European | 2017 | -0.00369 | 0.000472 | 5.62E-15 | 337159 | 13243  | 323916 | 1  | risk diff | Neale-B_UKBB_EUR_2017             |
| rs860262   | Treatment with metformin                                                    | Neale B | UKBB     | European | 2017 | -0.00253 | 0.000379 | 2.53E-11 | 337159 | 8392   | 328767 | 1  | risk diff | Neale-B_UKBB_EUR_2017             |
| rs9468156  | Diastolic blood pressure                                                    | Neale B | UKBB     | European | 2017 | 0.01423  | 0.003184 | 7.85E-06 | 317756 | 0      | 317756 | 1  | IVNT      | Neale-B_UKBB_EUR_2017             |
| rs9939726  | Self-reported hypertension                                                  | Neale B | UKBB     | European | 2017 | -0.00474 | 0.001065 | 8.45E-06 | 337159 | 87690  | 249469 | 1  | risk diff | Neale-B_UKBB_EUR_2017             |

|           |                         |         |      |          |      |          |          |          |        |   |        |        |                       |
|-----------|-------------------------|---------|------|----------|------|----------|----------|----------|--------|---|--------|--------|-----------------------|
| rs9939726 | Systolic blood pressure | Neale B | UKBB | European | 2017 | -0.01099 | 0.002458 | 7.78E-06 | 317754 | 0 | 317754 | 1 IVNT | Neale-B_UKBB_EUR_2017 |
|-----------|-------------------------|---------|------|----------|------|----------|----------|----------|--------|---|--------|--------|-----------------------|
